# Supplementary material
Source: MDPI journal article supplement (https://www.mdpi.com/2304-6740/7/10/122)

# checkCIF/PLATON report

Structure factors have been supplied for datablock(s) MnH5As2O8.5

THIS REPORT IS FOR GUIDANCE ONLY. IF USED AS PART OF A REVIEW PROCEDURE FOR PUBLICATION, IT SHOULD NOT REPLACE THE EXPERTISE OF AN EXPERIENCED CRYSTALLOGRAPHIC REFEREE.

No syntax errors found.      CIF dictionary      Interpreting this report

## Datablock: MnH5As2O8.5

---

Bond precision:    As- O = 0.0038 A                      Wavelength=0.71073

Cell:                      a=4.975(1)                      b=5.4747(11)                      c=13.603(3)  
                              alpha=98.86(3)                      beta=93.63(3)                      gamma=99.09(3)  
Temperature:            293 K

|                | Calculated      | Reported               |
|----------------|-----------------|------------------------|
| Volume         | 360.02(14)      | 360.02(13)             |
| Space group    | P -1            | P -1                   |
| Hall group     | -P 1            | -P 1                   |
| Moiety formula | 2(As2 Mn O8), O | (As2 Mn O8), 0.5(O H2) |
| Sum formula    | As4 Mn2 O17     | As2 H5 Mn O8.50        |
| Mr             | 681.56          | 345.82                 |
| Dx,g cm-3      | 3.144           | 3.190                  |
| Z              | 1               | 2                      |
| Mu (mm-1)      | 10.964          | 10.966                 |
| F000           | 318.0           | 328.0                  |
| F000'          | 319.10          |                        |
| h,k,lmax       | 6,7,19          | 6,7,19                 |
| Nref           | 2091            | 2087                   |
| Tmin,Tmax      | 0.108,0.769     | 0.526,0.748            |
| Tmin'          | 0.005           |                        |

Correction method= # Reported T Limits: Tmin=0.526 Tmax=0.748  
AbsCorr = MULTI-SCAN

Data completeness= 0.998                      Theta(max)= 29.996

R(reflections)= 0.0332( 1831)                      wR2(reflections)= 0.1053( 2087)

S = 1.132                      Npar= 104

---

The following ALERTS were generated. Each ALERT has the format

**test-name\_ALERT\_alert-type\_alert-level.**

Click on the hyperlinks for more details of the test.

---

### Alert level B

PLAT043\_ALERT\_1\_B Calculated and Reported Mol. Weight Differ by .. 10.08 Check

---

### Alert level C

PLAT041\_ALERT\_1\_C Calc. and Reported SumFormula Strings Differ Please Check  
PLAT068\_ALERT\_1\_C Reported F000 Differs from Calcd (or Missing)... Please Check  
PLAT220\_ALERT\_2\_C Non-Solvent Resd 1 O Ueq(max)/Ueq(min) Range 4.4 Ratio  
PLAT242\_ALERT\_2\_C Low 'MainMol' Ueq as Compared to Neighbors of As2 Check  
PLAT975\_ALERT\_2\_C Check Calcd Resid. Dens. 0.71A From Ow 1.28 eA-3  
PLAT975\_ALERT\_2\_C Check Calcd Resid. Dens. 0.59A From Ow 0.81 eA-3  
PLAT975\_ALERT\_2\_C Check Calcd Resid. Dens. 1.00A From O4 0.56 eA-3  
PLAT976\_ALERT\_2\_C Check Calcd Resid. Dens. 0.45A From Ow -0.90 eA-3  
PLAT976\_ALERT\_2\_C Check Calcd Resid. Dens. 0.78A From O4 -0.59 eA-3

---

### Alert level G

FORMU01\_ALERT\_1\_G There is a discrepancy between the atom counts in the  
\_chemical\_formula\_sum and \_chemical\_formula\_moiety. This is  
usually due to the moiety formula being in the wrong format.  
Atom count from \_chemical\_formula\_sum: H5 As2 Mn1 O8.5  
Atom count from \_chemical\_formula\_moiety: H1 As2 Mn1 O8.5  
FORMU01\_ALERT\_2\_G There is a discrepancy between the atom counts in the  
\_chemical\_formula\_sum and the formula from the \_atom\_site\* data.  
Atom count from \_chemical\_formula\_sum: H5 As2 Mn1 O8.5  
Atom count from the \_atom\_site data: As2 Mn1 O8.5  
CELLZ01\_ALERT\_1\_G Difference between formula and atom\_site contents detected.  
CELLZ01\_ALERT\_1\_G WARNING: H atoms missing from atom site list. Is this intentional?  
From the CIF: \_cell\_formula\_units\_Z 2  
From the CIF: \_chemical\_formula\_sum As2 H5 Mn O8.50  
TEST: Compare cell contents of formula and atom\_site data

| atom | Z*formula | cif sites | diff  |
|------|-----------|-----------|-------|
| As   | 4.00      | 4.00      | 0.00  |
| H    | 10.00     | 0.00      | 10.00 |
| Mn   | 2.00      | 2.00      | 0.00  |
| O    | 17.00     | 17.00     | 0.00  |

PLAT004\_ALERT\_5\_G Polymeric Structure Found with Maximum Dimension 3 Info  
PLAT042\_ALERT\_1\_G Calc. and Reported MoietyFormula Strings Differ Please Check  
PLAT045\_ALERT\_1\_G Calculated and Reported Z Differ by a Factor ... 0.50 Check  
PLAT154\_ALERT\_1\_G The s.u.'s on the Cell Angles are Equal ..(Note) 0.03 Degree  
PLAT199\_ALERT\_1\_G Reported \_cell\_measurement\_temperature ..... (K) 293 Check  
PLAT200\_ALERT\_1\_G Reported \_diffrn\_ambient\_temperature ..... (K) 293 Check  
PLAT300\_ALERT\_4\_G Atom Site Occupancy of Ow Constrained at 0.5 Check  
PLAT302\_ALERT\_4\_G Anion/Solvent/Minor-Residue Disorder (Resd 2 ) 100% Note  
PLAT311\_ALERT\_2\_G Isolated Disordered Oxygen Atom (No H's ?) ..... Ow Check  
PLAT720\_ALERT\_4\_G Number of Unusual/Non-Standard Labels ..... 1 Note  
PLAT794\_ALERT\_5\_G Tentative Bond Valency for Mn1 (II) . 2.03 Info  
PLAT883\_ALERT\_1\_G No Info/Value for \_atom\_sites\_solution\_primary . Please Do !  
PLAT910\_ALERT\_3\_G Missing # of FCF Reflection(s) Below Theta(Min). 3 Note  
PLAT960\_ALERT\_3\_G Number of Intensities with I < - 2\*sig(I) ... 1 Check  
PLAT992\_ALERT\_5\_G Repd & Actual \_reflns\_number\_gt Values Differ by 1 Check

---

- 0 **ALERT level A** = Most likely a serious problem - resolve or explain  
1 **ALERT level B** = A potentially serious problem, consider carefully  
9 **ALERT level C** = Check. Ensure it is not caused by an omission or oversight  
19 **ALERT level G** = General information/check it is not something unexpected

12 ALERT type 1 CIF construction/syntax error, inconsistent or missing data

9 ALERT type 2 Indicator that the structure model may be wrong or deficient  
2 ALERT type 3 Indicator that the structure quality may be low  
3 ALERT type 4 Improvement, methodology, query or suggestion  
3 ALERT type 5 Informative message, check

---

It is advisable to attempt to resolve as many as possible of the alerts in all categories. Often the minor alerts point to easily fixed oversights, errors and omissions in your CIF or refinement strategy, so attention to these fine details can be worthwhile. In order to resolve some of the more serious problems it may be necessary to carry out additional measurements or structure refinements. However, the purpose of your study may justify the reported deviations and the more serious of these should normally be commented upon in the discussion or experimental section of a paper or in the "special\_details" fields of the CIF. checkCIF was carefully designed to identify outliers and unusual parameters, but every test has its limitations and alerts that are not important in a particular case may appear. Conversely, the absence of alerts does not guarantee there are no aspects of the results needing attention. It is up to the individual to critically assess their own results and, if necessary, seek expert advice.

### **Publication of your CIF in IUCr journals**

A basic structural check has been run on your CIF. These basic checks will be run on all CIFs submitted for publication in IUCr journals (*Acta Crystallographica*, *Journal of Applied Crystallography*, *Journal of Synchrotron Radiation*); however, if you intend to submit to *Acta Crystallographica Section C* or *E* or *IUCrData*, you should make sure that full publication checks are run on the final version of your CIF prior to submission.

### **Publication of your CIF in other journals**

Please refer to the *Notes for Authors* of the relevant journal for any special instructions relating to CIF submission.

---

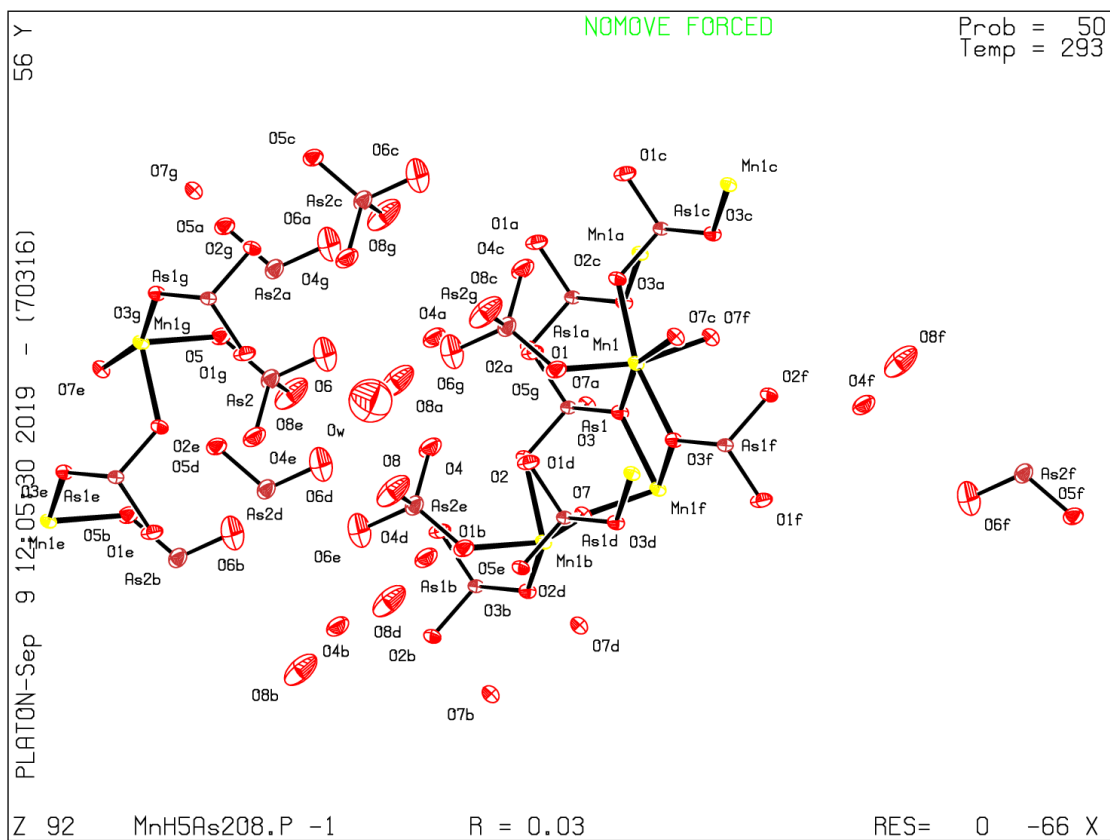

Supplement: s1 [file s1 › MnH5As2O9_checkcif_output.pdf]
