# Supplementary material
Source: MDPI journal article supplement (https://www.mdpi.com/2304-6740/7/10/122)

# checkCIF/PLATON report

Structure factors have been supplied for datablock(s) ZnAs2H4O8

THIS REPORT IS FOR GUIDANCE ONLY. IF USED AS PART OF A REVIEW PROCEDURE FOR PUBLICATION, IT SHOULD NOT REPLACE THE EXPERTISE OF AN EXPERIENCED CRYSTALLOGRAPHIC REFEREE.

No syntax errors found.      CIF dictionary      Interpreting this report

## Datablock: ZnAs2H4O8

---

Bond precision:    As- O = 0.0044 Å                      Wavelength=0.71073

Cell:                      a=4.9187(3)                      b=5.2357(3)                      c=12.8459(8)  
                                    alpha=83.987(3)                      beta=81.286(3)                      gamma=80.117(3)  
Temperature:    296 K

|                | Calculated  | Reported     |
|----------------|-------------|--------------|
| Volume         | 321.09(3)   | 321.09(3)    |
| Space group    | P -1        | P -1         |
| Hall group     | -P 1        | -P 1         |
| Moiety formula | As2 O8 Zn   | As2 O8 Zn    |
| Sum formula    | As2 O8 Zn   | As2 H4 O8 Zn |
| Mr             | 343.23      | 347.24       |
| Dx,g cm-3      | 3.550       | 3.592        |
| Z              | 2           | 2            |
| Mu (mm-1)      | 14.052      | 14.054       |
| F000           | 320.0       | 328.0        |
| F000'          | 321.02      |              |
| h,k,lmax       | 7,7,18      | 7,7,18       |
| Nref           | 2049        | 2011         |
| Tmin,Tmax      | 0.202,0.869 | 0.480,0.747  |
| Tmin'          | 0.170       |              |

Correction method= # Reported T Limits: Tmin=0.480 Tmax=0.747  
AbsCorr = MULTI-SCAN

Data completeness= 0.981                      Theta(max)= 30.978

R(reflections)= 0.0380( 1600)                      wR2(reflections)= 0.0994( 2011)

S = 1.032                      Npar= 100

---

The following ALERTS were generated. Each ALERT has the format

**test-name\_ALERT\_alert-type\_alert-level.**

Click on the hyperlinks for more details of the test.

---

## 🟡 Alert level B

PLAT043\_ALERT\_1\_B Calculated and Reported Mol. Weight Differ by .. 4.01 Check

---

## 🟢 Alert level C

PLAT041\_ALERT\_1\_C Calc. and Reported SumFormula Strings Differ Please Check  
PLAT068\_ALERT\_1\_C Reported F000 Differs from Calcd (or Missing)... Please Check  
PLAT220\_ALERT\_2\_C Non-Solvent Resd 1 O Ueq(max)/Ueq(min) Range 3.2 Ratio  
PLAT242\_ALERT\_2\_C Low 'MainMol' Ueq as Compared to Neighbors of As2 Check  
PLAT911\_ALERT\_3\_C Missing FCF Refl Between Thmin & STh/L= 0.600 12 Report  
PLAT971\_ALERT\_2\_C Check Calcd Resid. Dens. 0.76A From As1 1.93 eA-3  
PLAT975\_ALERT\_2\_C Check Calcd Resid. Dens. 0.90A From O6 0.76 eA-3  
PLAT975\_ALERT\_2\_C Check Calcd Resid. Dens. 0.46A From O7 0.70 eA-3  
PLAT975\_ALERT\_2\_C Check Calcd Resid. Dens. 0.85A From O1 0.66 eA-3  
PLAT976\_ALERT\_2\_C Check Calcd Resid. Dens. 0.87A From O4 -0.60 eA-3

---

## 🟠 Alert level G

FORMU01\_ALERT\_1\_G There is a discrepancy between the atom counts in the  
\_chemical\_formula\_sum and \_chemical\_formula\_moiety. This is  
usually due to the moiety formula being in the wrong format.  
Atom count from \_chemical\_formula\_sum: H4 As2 O8 Zn1  
Atom count from \_chemical\_formula\_moiety:As2 O8 Zn1  
FORMU01\_ALERT\_2\_G There is a discrepancy between the atom counts in the  
\_chemical\_formula\_sum and the formula from the \_atom\_site\* data.  
Atom count from \_chemical\_formula\_sum:H4 As2 O8 Zn1  
Atom count from the \_atom\_site data: As2 O8 Zn1  
CELLZ01\_ALERT\_1\_G Difference between formula and atom\_site contents detected.  
CELLZ01\_ALERT\_1\_G WARNING: H atoms missing from atom site list. Is this intentional?  
From the CIF: \_cell\_formula\_units\_Z 2  
From the CIF: \_chemical\_formula\_sum As2 H4 O8 Zn  
TEST: Compare cell contents of formula and atom\_site data

| atom | Z*formula | cif sites | diff |
|------|-----------|-----------|------|
| As   | 4.00      | 4.00      | 0.00 |
| H    | 8.00      | 0.00      | 8.00 |
| O    | 16.00     | 16.00     | 0.00 |
| Zn   | 2.00      | 2.00      | 0.00 |

PLAT004\_ALERT\_5\_G Polymeric Structure Found with Maximum Dimension 2 Info  
PLAT154\_ALERT\_1\_G The s.u.'s on the Cell Angles are Equal ..(Note) 0.003 Degree  
PLAT794\_ALERT\_5\_G Tentative Bond Valency for Zn1 (II) 1.98 Info  
PLAT883\_ALERT\_1\_G No Info/Value for \_atom\_sites\_solution\_primary . Please Do !  
PLAT910\_ALERT\_3\_G Missing # of FCF Reflection(s) Below Theta(Min). 2 Note  
PLAT912\_ALERT\_4\_G Missing # of FCF Reflections Above STh/L= 0.600 25 Note  
PLAT933\_ALERT\_2\_G Number of OMIT Records in Embedded .res File ... 2 Note  
PLAT960\_ALERT\_3\_G Number of Intensities with I < - 2\*sig(I) ... 1 Check

---

0 **ALERT level A** = Most likely a serious problem - resolve or explain  
1 **ALERT level B** = A potentially serious problem, consider carefully  
10 **ALERT level C** = Check. Ensure it is not caused by an omission or oversight  
12 **ALERT level G** = General information/check it is not something unexpected

8 ALERT type 1 CIF construction/syntax error, inconsistent or missing data  
9 ALERT type 2 Indicator that the structure model may be wrong or deficient  
3 ALERT type 3 Indicator that the structure quality may be low  
1 ALERT type 4 Improvement, methodology, query or suggestion  
2 ALERT type 5 Informative message, check

---

It is advisable to attempt to resolve as many as possible of the alerts in all categories. Often the minor alerts point to easily fixed oversights, errors and omissions in your CIF or refinement strategy, so attention to these fine details can be worthwhile. In order to resolve some of the more serious problems it may be necessary to carry out additional measurements or structure refinements. However, the purpose of your study may justify the reported deviations and the more serious of these should normally be commented upon in the discussion or experimental section of a paper or in the "special\_details" fields of the CIF. checkCIF was carefully designed to identify outliers and unusual parameters, but every test has its limitations and alerts that are not important in a particular case may appear. Conversely, the absence of alerts does not guarantee there are no aspects of the results needing attention. It is up to the individual to critically assess their own results and, if necessary, seek expert advice.

### **Publication of your CIF in IUCr journals**

A basic structural check has been run on your CIF. These basic checks will be run on all CIFs submitted for publication in IUCr journals (*Acta Crystallographica*, *Journal of Applied Crystallography*, *Journal of Synchrotron Radiation*); however, if you intend to submit to *Acta Crystallographica Section C* or *E* or *IUCrData*, you should make sure that full publication checks are run on the final version of your CIF prior to submission.

### **Publication of your CIF in other journals**

Please refer to the *Notes for Authors* of the relevant journal for any special instructions relating to CIF submission.

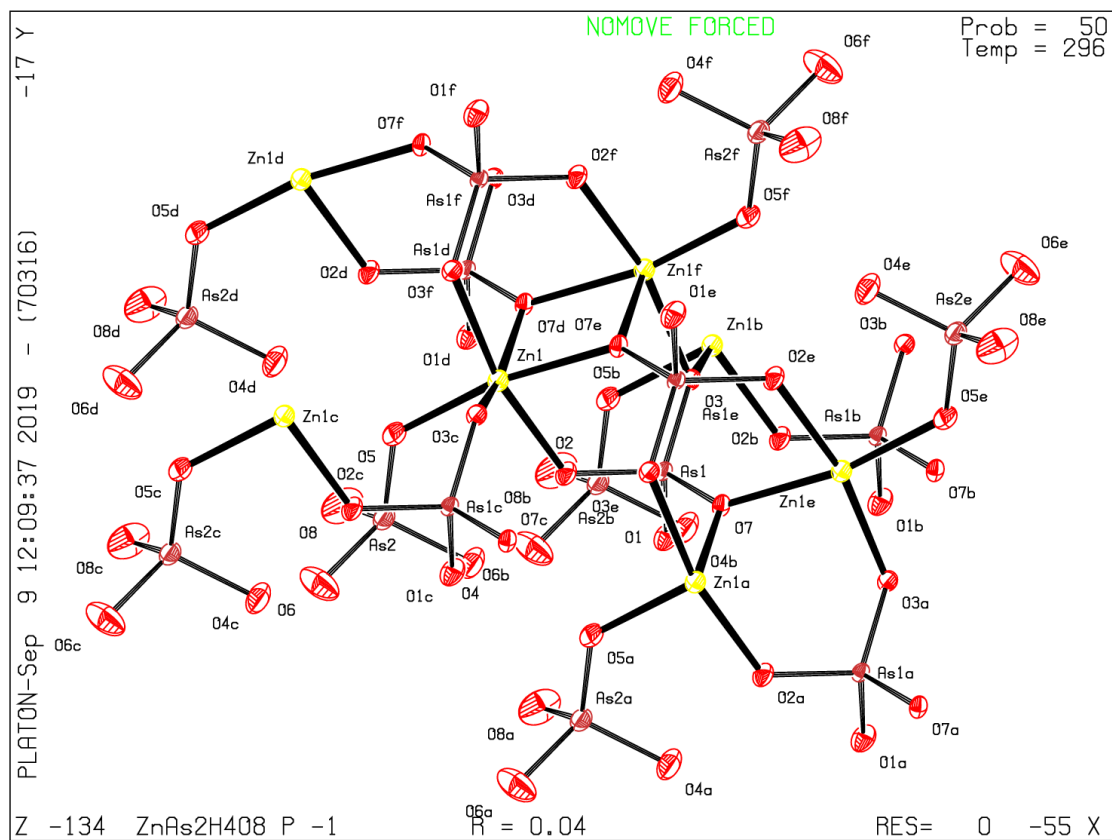

Supplement: s1 [file s1 › ZnH4As2O8_checkcif_output.pdf]
