# Supplementary material
Source: MDPI journal article supplement (https://www.mdpi.com/2304-6740/7/10/122)
Supplement: s1 [file s1]

Archive with 14 entries (14 files):
- CdH5As2O9.cif
- CdH5As2O9_checkcif_output.pdf
- CoH10As4O16.cif
- CoH10As4O16_checkcif_output.pdf
- MgH10As4O16.cif
- MgH10As4O16_checkcif_output.pdf
- MnH10As4O16.cif
- MnH10As4O16_checkcif_output.pdf
- MnH5As2O9.cif
- MnH5As2O9_checkcif_output.pdf
- NiH10As4O16.cif
- NiH10As4O16_checkcif_output.pdf
- ZnH4As2O8.cif
- ZnH4As2O8_checkcif_output.pdf
