# Supplementary material
Source: MDPI journal article supplement (https://www.mdpi.com/2304-6740/7/10/122)
Supplement: s1 [file s1 › CdH5As2O9.cif]

data_global       

_publ_contact_author_name
  
;       
Matthias Weil       
;       
  
_publ_contact_author_address  
  
;  
Institute for Chemical Technologies and Analytics
Division of Structural Chemistry
TU Wien
Getreidemarkt 9/164-SC
A-1060 Vienna
Austria       
;  
  
_publ_contact_author_phone      '+43 1 58801 17122'
_publ_contact_author_fax        '+43 1 58801 17199'  
_publ_contact_author_email      'matthias.weil@tuwien.ac.at'
_publ_contact_letter
;
Please consider this CIF submission as supporting information
for Inorganic Chemistry.
;
_publ_requested_journal
;
data deposition
;
_publ_requested_category
;
;
_publ_requested_coeditor_name   ?
_journal_date_recd_electronic      ?
_journal_date_to_coeditor       ?
_journal_date_from_coeditor     ?       
_journal_date_accepted     ?
_journal_date_printers_first    ?       
_journal_date_printers_final    ?       
_journal_date_proofs_out        ?       
_journal_date_proofs_in ?       
_journal_coeditor_name  ?       
_journal_coeditor_code     ?
_journal_paper_category      ?
_journal_coeditor_notes   ?       
_journal_techeditor_code      ?
_iucr_compatibility_tag          ?
_journal_techeditor_notes ?       
_journal_coden_ASTM     ?       
_journal_name_full      ?       
_journal_year   ?       
_journal_volume ?       
_journal_issue  ?       
_journal_page_first     ?       
_journal_page_last      ?       
_journal_suppl_publ_number      ?       
_journal_suppl_publ_pages       ?       
  
_publ_section_title             
;   
data deposition
;
loop_       
  
 _publ_author_name       
 _publ_author_address       

'Weil, Matthias'
;  
Institute for Chemical Technologies and Analytics
Division of Structural Chemistry
TU Wien
Getreidemarkt 9/164-SC
A-1060 Vienna
Austria       
; 

_publ_section_abstract
;
;
_publ_section_comment
;
;
_publ_section_exptl_prep
;
;

_publ_section_exptl_refinement
;
;

_publ_section_references
;


;
_publ_section_acknowledgements
;
;

_publ_section_figure_captions
;
;
 
data_CdH5As2O8.5 
 
_audit_creation_method            'SHELXL-2018/3'
_shelx_SHELXL_version_number      '2018/3'
_chemical_name_systematic         ?
_chemical_name_common             ?
_chemical_melting_point           ?
_chemical_formula_moiety          ?
_chemical_formula_sum
 'As2 H5 Cd O8.50' 
_chemical_formula_weight          403.28

loop_
 _atom_type_symbol
 _atom_type_description
 _atom_type_scat_dispersion_real
 _atom_type_scat_dispersion_imag
 _atom_type_scat_source
 'O'  'O'   0.0106   0.0060
 'International Tables Vol C Tables 4.2.6.8 and 6.1.1.4'
 'H'  'H'   0.0000   0.0000
 'International Tables Vol C Tables 4.2.6.8 and 6.1.1.4'
 'As'  'As'   0.0499   2.0058
 'International Tables Vol C Tables 4.2.6.8 and 6.1.1.4'
 'Cd'  'Cd'  -0.8075   1.2024
 'International Tables Vol C Tables 4.2.6.8 and 6.1.1.4'
 
_space_group_crystal_system       triclinic
_space_group_IT_number            2
_space_group_name_H-M_alt         'P -1'
_space_group_name_Hall            '-P 1'
 
_shelx_space_group_comment
;
The symmetry employed for this shelxl refinement is uniquely defined
by the following loop, which should always be used as a source of
symmetry information in preference to the above space-group names.
They are only intended as comments.
;
 
loop_
 _space_group_symop_operation_xyz
 'x, y, z'
 '-x, -y, -z'
 
_cell_length_a                    5.0188(9)
_cell_length_b                    5.6180(10)
_cell_length_c                    13.734(2)
_cell_angle_alpha                 99.254(3)
_cell_angle_beta                  93.756(3)
_cell_angle_gamma                 98.845(3)
_cell_volume                      376.02(12)
_cell_formula_units_Z             2
_cell_measurement_temperature     293(2)
_cell_measurement_reflns_used     2288
_cell_measurement_theta_min       3.018
_cell_measurement_theta_max       30.916
 
_exptl_crystal_description        plate
_exptl_crystal_colour             colourless
_exptl_crystal_density_meas       ?
_exptl_crystal_density_method     ?
_exptl_crystal_density_diffrn     3.562          
_exptl_crystal_F_000              374
_exptl_transmission_factor_min    ?
_exptl_transmission_factor_max    ?
_exptl_crystal_size_max           0.200
_exptl_crystal_size_mid           0.150
_exptl_crystal_size_min           0.020
_exptl_absorpt_coefficient_mu     11.648
_shelx_estimated_absorpt_T_min    0.204
_shelx_estimated_absorpt_T_max    0.800
_exptl_absorpt_correction_type    'multi-scan'
_exptl_absorpt_correction_T_min   0.443
_exptl_absorpt_correction_T_max   0.663
_exptl_absorpt_process_details    'SADABS'
_exptl_absorpt_special_details    ?
_diffrn_ambient_temperature       293(2)
_diffrn_radiation_wavelength      0.71073
_diffrn_radiation_type            MoK\a
_diffrn_source                    ?
_diffrn_measurement_device_type   'Bruker SMART CCD'
_diffrn_measurement_method        '\w-scans'
_diffrn_detector_area_resol_mean  ?
_diffrn_reflns_number             4430
_diffrn_reflns_av_unetI/netI      0.0480
_diffrn_reflns_av_R_equivalents   0.0287
_diffrn_reflns_limit_h_min        -7
_diffrn_reflns_limit_h_max        7
_diffrn_reflns_limit_k_min        -7
_diffrn_reflns_limit_k_max        8
_diffrn_reflns_limit_l_min        -19
_diffrn_reflns_limit_l_max        19
_diffrn_reflns_theta_min          3.019
_diffrn_reflns_theta_max          31.061
_diffrn_reflns_theta_full         25.242
_diffrn_measured_fraction_theta_max   0.966
_diffrn_measured_fraction_theta_full  0.999
_diffrn_reflns_Laue_measured_fraction_max    0.966
_diffrn_reflns_Laue_measured_fraction_full   0.999
_diffrn_reflns_point_group_measured_fraction_max   0.966
_diffrn_reflns_point_group_measured_fraction_full  0.999
_reflns_number_total              2326
_reflns_number_gt                 1996
_reflns_threshold_expression      'I > 2\s(I)'
_reflns_Friedel_coverage          0.000
_reflns_Friedel_fraction_max      .
_reflns_Friedel_fraction_full     .
 
_reflns_special_details
;
 Reflections were merged by SHELXL according to the crystal
 class for the calculation of statistics and refinement.
 
 _reflns_Friedel_fraction is defined as the number of unique
 Friedel pairs measured divided by the number that would be
 possible theoretically, ignoring centric projections and
 systematic absences.
;
 
_computing_data_collection        'SMART (Bruker, 2008)'
_computing_cell_refinement        'SAINT (Bruker, 2008)'
_computing_data_reduction         'SAINT (Bruker, 2008)'
_computing_structure_solution     'SHELXS (Sheldrick, 2008)'
_computing_structure_refinement 'SHELXL-2018/3 (Sheldrick, 2018)'
_computing_molecular_graphics     ?
_computing_publication_material   ?
_refine_special_details           ?
_refine_ls_structure_factor_coef  Fsqd
_refine_ls_matrix_type            full
_refine_ls_weighting_scheme       calc
_refine_ls_weighting_details
'w=1/[\s^2^(Fo^2^)+(0.0493P)^2^+0.5709P] where P=(Fo^2^+2Fc^2^)/3'
_atom_sites_solution_primary      ?
_atom_sites_solution_secondary    ?
_atom_sites_solution_hydrogens    .
_refine_ls_hydrogen_treatment     undef
_refine_ls_extinction_method      none
_refine_ls_extinction_coef        .
_refine_ls_number_reflns          2326
_refine_ls_number_parameters      104
_refine_ls_number_restraints      0
_refine_ls_R_factor_all           0.0428
_refine_ls_R_factor_gt            0.0350
_refine_ls_wR_factor_ref          0.0950
_refine_ls_wR_factor_gt           0.0903
_refine_ls_goodness_of_fit_ref    1.041
_refine_ls_restrained_S_all       1.041
_refine_ls_shift/su_max           0.000
_refine_ls_shift/su_mean          0.000
 
loop_
 _atom_site_label
 _atom_site_type_symbol
 _atom_site_fract_x
 _atom_site_fract_y
 _atom_site_fract_z
 _atom_site_U_iso_or_equiv
 _atom_site_adp_type
 _atom_site_occupancy
 _atom_site_site_symmetry_order  
 _atom_site_calc_flag
 _atom_site_refinement_flags_posn
 _atom_site_refinement_flags_adp
 _atom_site_refinement_flags_occupancy
 _atom_site_disorder_assembly
 _atom_site_disorder_group
Cd1 Cd 0.48075(6) 0.78242(6) 0.07599(2) 0.01798(10) Uani 1 1 d . . . . .
As1 As 0.06682(8) 0.25364(8) 0.11351(3) 0.01541(11) Uani 1 1 d . . . . .
As2 As 0.42529(12) 0.15945(12) 0.66520(4) 0.03341(15) Uani 1 1 d . . . . .
O1 O 0.0398(7) 0.4578(7) 0.2180(3) 0.0293(8) Uani 1 1 d . . . . .
O2 O 0.2204(7) 0.0397(6) 0.1583(3) 0.0228(7) Uani 1 1 d . . . . .
O3 O 0.2586(6) 0.3967(6) 0.0384(3) 0.0206(6) Uani 1 1 d . . . . .
O4 O 0.3259(9) 0.0063(9) 0.3333(3) 0.0426(11) Uani 1 1 d . . . . .
O5 O 0.3395(8) 0.2678(8) 0.7755(3) 0.0329(9) Uani 1 1 d . . . . .
O6 O 0.5057(16) 0.3805(15) 0.5973(5) 0.082(2) Uani 1 1 d . . . . .
O7 O 0.7624(6) 0.1269(6) 0.0578(3) 0.0193(6) Uani 1 1 d . . . . .
O8 O 0.8446(12) 0.0265(15) 0.4034(4) 0.082(2) Uani 1 1 d . . . . .
OW O 1.006(8) 0.508(7) 0.532(2) 0.173(11) Uiso 0.5 1 d . . P . .
 
loop_
 _atom_site_aniso_label
 _atom_site_aniso_U_11
 _atom_site_aniso_U_22
 _atom_site_aniso_U_33
 _atom_site_aniso_U_23
 _atom_site_aniso_U_13
 _atom_site_aniso_U_12
Cd1 0.01809(15) 0.01449(16) 0.02174(18) 0.00432(12) 0.00334(11) 0.00206(11)
As1 0.01186(18) 0.0138(2) 0.0203(2) 0.00213(16) 0.00289(15) 0.00172(14)
As2 0.0331(3) 0.0518(4) 0.0187(3) 0.0039(2) 0.0007(2) 0.0206(3)
O1 0.0304(17) 0.031(2) 0.0255(18) -0.0042(15) 0.0025(14) 0.0129(15)
O2 0.0251(15) 0.0215(16) 0.0247(17) 0.0046(13) 0.0052(13) 0.0112(13)
O3 0.0189(14) 0.0152(14) 0.0281(18) 0.0044(13) 0.0079(12) 0.0008(11)
O4 0.044(2) 0.066(3) 0.024(2) 0.003(2) 0.0075(17) 0.031(2)
O5 0.0309(18) 0.048(2) 0.0242(18) 0.0035(17) 0.0015(14) 0.0233(17)
O6 0.109(5) 0.100(5) 0.055(4) 0.045(4) 0.023(4) 0.035(4)
O7 0.0132(12) 0.0172(15) 0.0278(17) 0.0095(13) 0.0000(12) -0.0017(11)
O8 0.047(3) 0.129(6) 0.051(3) -0.041(4) -0.017(3) 0.030(3)
 
_geom_special_details
;
 All esds (except the esd in the dihedral angle between two l.s. planes)
 are estimated using the full covariance matrix.  The cell esds are taken
 into account individually in the estimation of esds in distances, angles
 and torsion angles; correlations between esds in cell parameters are only
 used when they are defined by crystal symmetry.  An approximate (isotropic)
 treatment of cell esds is used for estimating esds involving l.s. planes.
;
 
loop_
 _geom_bond_atom_site_label_1
 _geom_bond_atom_site_label_2
 _geom_bond_distance
 _geom_bond_site_symmetry_2
 _geom_bond_publ_flag
Cd1 O3 2.242(3) . ?
Cd1 O5 2.253(4) 2_666 ?
Cd1 O7 2.273(3) 1_565 ?
Cd1 O2 2.307(3) 1_565 ?
Cd1 O7 2.307(3) 2_665 ?
Cd1 O3 2.314(3) 2_665 ?
Cd1 Cd1 3.4524(8) 2_675 ?
As1 O7 1.663(3) 1_455 ?
As1 O3 1.672(3) . ?
As1 O2 1.696(3) . ?
As1 O1 1.714(4) . ?
As2 O5 1.649(4) . ?
As2 O4 1.670(4) 2_656 ?
As2 O6 1.686(7) . ?
As2 O8 1.702(6) 2_656 ?
OW OW 0.85(6) 2_766 ?
 
loop_
 _geom_angle_atom_site_label_1
 _geom_angle_atom_site_label_2
 _geom_angle_atom_site_label_3
 _geom_angle
 _geom_angle_site_symmetry_1
 _geom_angle_site_symmetry_3
 _geom_angle_publ_flag
O3 Cd1 O5 93.72(15) . 2_666 ?
O3 Cd1 O7 158.28(13) . 1_565 ?
O5 Cd1 O7 99.09(14) 2_666 1_565 ?
O3 Cd1 O2 111.48(12) . 1_565 ?
O5 Cd1 O2 88.39(13) 2_666 1_565 ?
O7 Cd1 O2 86.48(13) 1_565 1_565 ?
O3 Cd1 O7 88.76(12) . 2_665 ?
O5 Cd1 O7 168.55(12) 2_666 2_665 ?
O7 Cd1 O7 82.16(11) 1_565 2_665 ?
O2 Cd1 O7 80.31(12) 1_565 2_665 ?
O3 Cd1 O3 77.82(12) . 2_665 ?
O5 Cd1 O3 105.20(12) 2_666 2_665 ?
O7 Cd1 O3 81.92(12) 1_565 2_665 ?
O2 Cd1 O3 163.32(12) 1_565 2_665 ?
O7 Cd1 O3 86.25(12) 2_665 2_665 ?
O3 Cd1 Cd1 126.67(9) . 2_675 ?
O5 Cd1 Cd1 139.37(12) 2_666 2_675 ?
O7 Cd1 Cd1 41.45(8) 1_565 2_675 ?
O2 Cd1 Cd1 81.20(9) 1_565 2_675 ?
O7 Cd1 Cd1 40.71(7) 2_665 2_675 ?
O3 Cd1 Cd1 82.17(8) 2_665 2_675 ?
O7 As1 O3 111.82(16) 1_455 . ?
O7 As1 O2 110.06(16) 1_455 . ?
O3 As1 O2 111.54(16) . . ?
O7 As1 O1 110.78(17) 1_455 . ?
O3 As1 O1 109.09(18) . . ?
O2 As1 O1 103.23(17) . . ?
O5 As2 O4 114.69(18) . 2_656 ?
O5 As2 O6 112.5(3) . . ?
O4 As2 O6 109.1(3) 2_656 . ?
O5 As2 O8 110.2(3) . 2_656 ?
O4 As2 O8 106.1(3) 2_656 2_656 ?
O6 As2 O8 103.5(4) . 2_656 ?
As1 O2 Cd1 127.67(19) . 1_545 ?
As1 O3 Cd1 125.16(18) . . ?
As1 O3 Cd1 126.14(17) . 2_665 ?
Cd1 O3 Cd1 102.18(12) . 2_665 ?
As2 O5 Cd1 127.53(18) . 2_666 ?
As1 O7 Cd1 131.05(17) 1_655 1_545 ?
As1 O7 Cd1 130.70(17) 1_655 2_665 ?
Cd1 O7 Cd1 97.84(11) 1_545 2_665 ?
 
_refine_diff_density_max    1.446
_refine_diff_density_min   -1.011
_refine_diff_density_rms    0.239

_shelx_res_file
;
TITL sad in P-1
    last.res
    created by SHELXL-2018/3 at 14:34:14 on 14-Jul-2019
CELL 0.71073   5.0188   5.6180  13.7336  99.254  93.756  98.845
ZERR    2.00   0.0009   0.0010   0.0024   0.003   0.003   0.003
LATT  1
SFAC O H AS CD
UNIT 17 10 4 2
TEMP 20
L.S. 20
BOND
FMAP 2
PLAN 20
acta
rem Xtal erhalten aus Ansatz: CdO in halbkonz H3AsO4 aufloesen. Die Loesung wird
rem sofort klar, es faellt aber keine Substanz aus. Beim Eindunsten
rem kristallisieren die Xtals in Form von duennen Plaettchen, die sich wie
rem Igelstacheln formieren. Daneben bildet ich noch eine zweite Phase
rem in Form von runden Plaettchen, die aber fuer eine Strukturuntersuchung nicht
rem brauchbar sind.
rem nach weiterer Zeit (ca. 1 d) haben sich die Kristalle umgewandelt unter
rem Bildung von CdH10(AsO4)4 [Acta Cryst. (1980) B36, 113!
rem Xtal nicht aufgehoben oder vermessen, da beim Abmontieren Faden abbrach
rem ungefaehre Groesse des Plaettchens: 0.2x0.15x0.02 mm
rem Daten mit Stidy standardisiert
rem Absorptionskorrektur mit SADABS
rem Restelektronendichte zeigt eindeutig (wenngleich schwach) einen Peak
rem der auf ein fehlgeordnetes Wassermolekuel hindeutet (halbbesetzt)
rem daher ist die Formel
rem isotyp mit Mn-Vbd
size 0.20 0.15 0.02
WGHT    0.049300    0.570900
FVAR       0.62163
CD1   4    0.480749    0.782422    0.075991    11.00000    0.01809    0.01449 =
         0.02174    0.00432    0.00334    0.00206
AS1   3    0.066816    0.253642    0.113511    11.00000    0.01186    0.01384 =
         0.02032    0.00213    0.00289    0.00172
AS2   3    0.425286    0.159450    0.665202    11.00000    0.03307    0.05182 =
         0.01870    0.00390    0.00068    0.02056
O1    1    0.039785    0.457786    0.217984    11.00000    0.03041    0.03138 =
         0.02553   -0.00419    0.00254    0.01288
O2    1    0.220369    0.039653    0.158270    11.00000    0.02505    0.02148 =
         0.02467    0.00463    0.00521    0.01116
O3    1    0.258608    0.396660    0.038394    11.00000    0.01886    0.01516 =
         0.02809    0.00439    0.00795    0.00081
O4    1    0.325855    0.006313    0.333303    11.00000    0.04370    0.06647 =
         0.02362    0.00281    0.00747    0.03113
O5    1    0.339550    0.267836    0.775522    11.00000    0.03086    0.04793 =
         0.02417    0.00347    0.00145    0.02329
O6    1    0.505660    0.380462    0.597322    11.00000    0.10936    0.09981 =
         0.05452    0.04542    0.02336    0.03481
O7    1    0.762390    0.126871    0.057777    11.00000    0.01317    0.01720 =
         0.02779    0.00955    0.00005   -0.00166
O8    1    0.844575    0.026508    0.403446    11.00000    0.04744    0.12909 =
         0.05109   -0.04056   -0.01719    0.03009
OW    1    1.006098    0.508074    0.531560    10.50000    0.17308
HKLF 4


REM  sad in P-1
REM wR2 = 0.0950, GooF = S = 1.041, Restrained GooF = 1.041 for all data
REM R1 = 0.0350 for 1996 Fo > 4sig(Fo) and 0.0428 for all 2326 data
REM 104 parameters refined using 0 restraints

END

WGHT      0.0494      0.5699

REM Highest difference peak  1.446,  deepest hole -1.011,  1-sigma level  0.239
Q1    1   0.5228  0.8248  0.1351  11.00000  0.05    1.45
Q2    1   0.8738  0.5084  0.5090  11.00000  0.05    1.42
Q3    1   0.0866  0.2994  0.1602  11.00000  0.05    1.34
Q4    1   0.4213  0.7202  0.0229  11.00000  0.05    1.32
Q5    1   0.0188  0.2223  0.0607  11.00000  0.05    1.19
Q6    1  -0.1246  0.5279  0.2198  11.00000  0.05    1.13
Q7    1   0.4139  0.0433  0.6649  11.00000  0.05    1.09
Q8    1   0.5284  0.2213  0.6592  11.00000  0.05    1.07
Q9    1   0.4095  0.1765  0.7092  11.00000  0.05    1.07
Q10   1   0.2660  0.0638  0.1959  11.00000  0.05    0.92
Q11   1   0.0076  0.2375  0.1411  11.00000  0.05    0.91
Q12   1   0.3754  0.1073  0.6251  11.00000  0.05    0.88
Q13   1  -0.0640  0.3825  0.1993  11.00000  0.05    0.85
Q14   1   0.2424  0.2998  0.0730  11.00000  0.05    0.83
Q15   1   1.0482  0.5997  0.5747  11.00000  0.05    0.78
Q16   1   0.6609  0.8219  0.0437  11.00000  0.05    0.77
Q17   1   0.3522  0.3401  0.0060  11.00000  0.05    0.75
Q18   1   0.6155 -0.0343 -0.0181  11.00000  0.05    0.71
Q19   1   0.3535  0.2572  0.8187  11.00000  0.05    0.70
Q20   1   0.2349  0.4628  0.0354  11.00000  0.05    0.69
;
_shelx_res_checksum   66849

_shelx_hkl_file
;
   1   0   0 2493.27  120.46   2
  -1   0   0 2530.27  119.50   3
   1   0   0 2408.09  144.41   1
  -2   0   0 4638.86  226.24   3
   2   0   0 4767.99  228.05   2
   2   0   0 4704.14  273.43   1
  -3   0   0  636.24   32.16   3
   3   0   0  643.14   32.44   2
   3   0   0  632.39   39.11   1
   4   0   0  524.28   33.25   1
  -4   0   0  509.13   27.05   3
   4   0   0  521.85   27.43   2
   5   0   0  277.47   20.87   1
   5   0   0  266.61   17.42   2
  -5   0   0  297.67   16.83   3
  -6   0   0   42.05    6.44   3
   6   0   0   37.44    7.80   1
  -7   0   0  199.53   14.77   3
  -7   1   0   41.01    7.43   3
   6  -1   0  227.41   16.38   2
  -6   1   0  245.32   15.45   3
   5  -1   0  138.26   11.40   2
  -5   1   0  149.71   10.36   3
   5  -1   0  121.22   11.59   1
  -4   1   0  540.96   27.95   3
   4  -1   0  531.50   33.67   1
   4  -1   0  523.46   28.32   2
   3  -1   0  356.70   19.48   2
  -3   1   0  349.05   19.05   3
   3  -1   0  371.87   23.22   1
   2  -1   0    6.87    3.20   1
   2  -1   0    1.94    2.71   2
  -2   1   0    0.16    2.05   3
  -1   1   0   -4.09    1.58   3
   1  -1   0   -0.51    3.19   1
  -1   1   0   -2.47    1.99   2
   0   1   0 1344.57   78.71   1
   0   1   0 1344.99   65.60   2
  -1  -1   0 3625.31  170.92   3
   1   1   0 3480.45  206.63   1
   2   1   0  140.36    7.95   2
   2   1   0  131.53   11.13   1
  -2  -1   0  133.76    8.38   3
  -3  -1   0 1645.67   83.11   3
   3   1   0 1744.11   83.59   2
   3   1   0 1729.23  100.90   1
  -4  -1   0  479.67   24.45   3
   4   1   0  413.90   29.86   1
   4   1   0  482.47   24.32   2
   5   1   0   17.78    6.85   1
  -5  -1   0   27.54    5.04   3
   6   1   0  214.19   18.92   1
  -6  -1   0  248.96   15.26   3
  -7   2   0  126.41   11.73   3
   7  -2   0  135.08   12.76   2
   6  -2   0   10.88    7.02   2
  -6   2   0    7.26    5.00   3
   5  -2   0  408.30   23.34   2
  -5   2   0  398.45   22.55   3
   4  -2   0  700.69   36.34   2
   4  -2   0  691.95   42.64   1
  -4   2   0  694.38   35.73   3
   3  -2   0 1579.41   93.14   1
   3  -2   0 1574.49   78.33   2
  -3   2   0 1600.52   77.60   3
   2  -2   0 7446.43  430.22   1
  -2   2   0 7379.09  356.12   3
  -1   2   0 1131.35   56.58   3
  -1   2   0 1218.00   68.23   1
  -1   2   0 1138.26   57.05   2
   0  -2   0 4317.01  210.35   3
   0   2   0 4507.67  211.90   2
   0   2   0 4299.04  254.17   1
   1   2   0 1251.41   76.37   1
  -1  -2   0 1342.99   63.19   3
   2   2   0 1695.44   89.98   2
   2   2   0 1949.75  108.70   1
  -2  -2   0 1902.67   89.57   3
   3   2   0   36.64    6.68   1
  -3  -2   0   32.52    4.41   3
   4   2   0   52.39    8.12   1
  -4  -2   0   49.96    5.59   3
  -5  -2   0  533.73   28.41   3
   5   2   0  527.23   34.88   1
   6   2   0    7.01    7.46   1
  -6  -2   0    5.90    4.67   3
  -7   3   0   -1.12    6.15   3
   7  -3   0    0.76    7.51   2
   6  -3   0  158.76   13.43   2
  -6   3   0  147.30   12.25   3
  -5   3   0   -2.18    4.55   3
   5  -3   0   -2.62    6.29   2
   4  -3   0 1518.12   76.09   2
  -4   3   0 1520.62   75.33   3
   3  -3   0   38.92    5.99   2
  -3   3   0   42.27    5.00   3
   3  -3   0   48.20    6.32   1
   2  -3   0 3968.14  230.38   1
  -2   3   0 3939.55  190.70   3
  -1   3   0 1021.42   52.07   2
  -1   3   0 1085.45   51.82   3
  -1   3   0 1063.41   62.31   1
   0   3   0 1298.60   63.49   2
   0  -3   0 1332.31   63.59   3
   0   3   0 1267.41   76.49   1
   1   3   0 1412.10   82.91   1
  -1  -3   0 1393.16   68.69   3
   2   3   0   29.45    5.63   1
  -2  -3   0   40.25    4.70   3
   3   3   0  691.28   42.46   1
  -3  -3   0  667.97   34.52   3
  -4  -3   0  221.92   13.81   3
   4   3   0  221.17   17.63   1
   5   3   0   11.74    7.56   1
  -5  -3   0   31.38    5.49   3
   6   3   0   82.16   12.33   1
   6  -4   0    2.72    8.24   2
  -6   4   0   12.89    5.96   3
  -5   4   0  385.10   22.65   3
   5  -4   0  397.52   23.73   2
  -4   4   0  113.62    9.68   3
   4  -4   0  133.90   11.62   2
  -3   4   0   96.82    8.52   3
   3  -4   0  103.76    8.91   2
  -2   4   0 1108.34   55.16   3
  -2   4   0 1119.84   66.27   1
  -1   4   0  109.46    8.17   3
  -1   4   0   95.93    7.83   2
  -1   4   0  112.18    9.12   1
   0   4   0 1305.82   77.38   1
   0   4   0 1259.63   63.95   2
   0  -4   0 1356.35   64.74   3
   1   4   0   74.98    7.75   1
  -1  -4   0   67.64    6.95   3
  -2  -4   0  797.78   38.73   3
   2   4   0  724.32   47.02   1
   3   4   0   52.24    8.44   1
  -3  -4   0   58.22    6.04   3
   4   4   0   96.91   11.94   1
  -4  -4   0  111.91    8.98   3
   5   4   0  385.73   28.54   1
   6  -5   0  463.54   28.68   2
  -6   5   0  443.70   26.84   3
   5  -5   0   58.75    9.98   2
  -5   5   0   71.83    8.76   3
   4  -5   0 1869.52   93.94   2
  -4   5   0 1882.17   92.93   3
   3  -5   0  379.19   21.43   2
  -3   5   0  350.26   20.48   3
   2  -5   0 1971.07   95.45   2
  -2   5   0 1890.84   94.58   3
   1  -5   0  424.09   23.22   3
  -1   5   0  431.52   27.19   1
   1  -5   0  425.51   22.73   2
   0  -5   0  564.97   30.69   3
   0   5   0  542.99   34.68   1
  -1  -5   0  782.92   43.06   3
   1   5   0  904.19   51.95   1
   2   5   0    2.26    5.85   1
  -2  -5   0   12.35    5.11   3
   3   5   0  342.86   24.65   1
   4   5   0   16.66    8.09   1
   5  -6   0   19.60    9.53   2
  -5   6   0   23.17    7.51   3
   4  -6   0   12.70    7.35   2
  -4   6   0   -0.36    5.67   3
  -3   6   0  184.44   13.21   3
   3  -6   0  194.69   14.26   2
   2  -6   0   40.54    6.27   2
  -2   6   0   32.42    6.68   3
  -1   6   0  152.09   13.79   1
   1  -6   0  176.54   13.45   3
   0  -6   0  281.66   20.05   3
   0   6   0  281.56   20.31   1
   1   6   0   79.66    9.84   1
  -1  -6   0   69.16    8.49   3
   2   6   0  198.98   17.03   1
   3   6   0  127.19   13.59   1
  -4   7   0  673.28   36.11   3
   4  -7   0  648.55   36.70   2
  -3   7   0   94.83   10.28   3
   2  -7   0  602.36   33.51   3
   1  -7   0  180.40   16.29   3
   1   7   0  315.28   23.56   1
   2   7   0   33.09    8.97   1
   2   7  -1   78.80   11.16   1
   1   7  -1  136.75   14.08   1
   0   7  -1  357.50   25.23   1
   2  -7   1 1052.01   54.69   3
  -3   7  -1   30.30    7.57   3
   4  -7   1  371.17   24.28   2
  -4   7  -1  421.05   23.88   3
   3   6  -1   37.06    8.82   1
   2   6  -1  687.32   44.07   1
   1   6  -1    1.38    6.12   1
   0  -6   1  783.63   44.58   3
   0   6  -1  874.99   51.41   1
   1  -6   1  153.31   12.33   3
  -1   6  -1  140.02   13.20   1
   2  -6   1  380.68   21.78   2
  -2   6  -1  382.95   21.80   3
   3  -6   1  192.08   14.33   2
  -3   6  -1  198.26   13.47   3
   4  -6   1   62.51    8.95   2
  -4   6  -1   61.41    8.25   3
   5  -6   1  352.63   22.89   2
  -5   6  -1  334.70   21.26   3
   4   5  -1   36.89    8.98   1
   3   5  -1  205.64   17.12   1
  -2  -5   1   52.10    5.90   3
   2   5  -1   38.27    7.63   1
  -1  -5   1  130.01   10.23   3
   1   5  -1  128.79   11.82   1
   0   5  -1  966.02   56.35   1
   0  -5   1  886.66   47.85   3
  -1   5  -1    1.98    4.55   1
  -1   5  -1    3.18    4.09   2
  -2   5  -1 1141.18   61.76   2
  -2   5  -1 1280.57   61.30   3
  -2   5  -1 1275.65   73.81   1
  -3   5  -1   21.48    5.19   3
   3  -5   1   22.06    6.30   2
   4  -5   1  364.45   21.94   2
  -4   5  -1  345.11   20.55   3
  -5   5  -1   -1.41    5.58   3
   5  -5   1    5.93    7.77   2
   6  -5   1   41.06   10.80   2
  -6   5  -1   41.88    8.00   3
   5   4  -1   48.71   10.25   1
   4   4  -1  413.78   28.76   1
  -3  -4   1  129.59    9.53   3
   3   4  -1  116.86   12.49   1
   2   4  -1 2821.62  167.19   1
  -2  -4   1 2864.28  137.83   3
  -1  -4   1  348.71   18.63   3
   1   4  -1  330.75   22.34   1
   0  -4   1 3437.96  170.48   3
   0   4  -1 3738.60  171.28   2
   0   4  -1 3389.66  205.62   1
  -1   4  -1 1457.40   88.45   1
  -1   4  -1 1555.03   73.37   3
  -1   4  -1 1486.27   73.82   2
  -2   4  -1 1763.85   86.10   2
  -2   4  -1 1727.65   85.24   3
  -3   4  -1 1193.94   58.45   3
   3  -4   1 1153.42   71.40   1
  -4   4  -1   -5.08    4.16   3
   4  -4   1   17.57    6.23   2
  -5   4  -1  333.55   19.73   3
   5  -4   1  317.09   20.76   2
   6  -4   1  117.75   12.13   2
  -6   4  -1  104.77   10.45   3
   6   3  -1  222.06   20.06   1
  -5  -3   1  102.76    8.42   3
   5   3  -1   83.09   11.38   1
   4   3  -1  209.53   16.23   1
  -4  -3   1  175.79   12.05   3
   3   3  -1  205.04   16.01   1
  -3  -3   1  213.38   12.72   3
  -2  -3   1   22.02    3.70   3
   2   3  -1   29.34    5.45   1
   1   3  -1   25.14    4.36   1
   1   3  -1   13.27    2.33   2
  -1  -3   1   16.74    3.51   3
   0   3  -1   27.42    3.24   2
   0   3  -1   26.92    4.11   1
   0  -3   1   26.68    3.45   3
  -1   3  -1  876.91   42.62   2
  -1   3  -1  834.30   42.11   3
  -1   3  -1  856.59   50.89   1
  -2   3  -1  289.16   15.98   2
  -2   3  -1  272.56   15.36   3
   2  -3   1  307.48   20.15   1
  -3   3  -1  314.46   18.12   3
   3  -3   1  355.77   23.18   1
  -4   3  -1  154.86   11.50   3
   4  -3   1  190.31   13.02   2
   4  -3   1  180.10   15.11   1
  -5   3  -1   14.56    5.12   3
   5  -3   1   11.34    6.79   2
  -6   3  -1  134.37   11.31   3
   6  -3   1  134.17   12.41   2
   7  -3   1  188.25   16.18   2
  -7   3  -1  224.40   15.79   3
  -6  -2   1   28.02    5.77   3
   6   2  -1   28.80    8.29   1
   5   2  -1  331.94   23.72   1
  -5  -2   1  329.09   18.96   3
  -4  -2   1  769.80   40.69   3
   4   2  -1  850.36   50.09   1
  -3  -2   1  139.50    9.43   3
   3   2  -1  156.86    9.42   2
   3   2  -1  136.82   12.51   1
  -2  -2   1 8171.99  408.59   3
   2   2  -1 8484.03  412.19   2
   2   2  -1 8885.69  494.45   1
   1   2  -1 2946.71  176.88   1
  -1  -2   1 3172.73  146.19   3
   1   2  -1 2976.00  147.09   2
   0   2  -1 8424.29  499.52   1
   0   2  -1 8803.22  416.64   2
  -1   2  -1    9.81    2.72   1
  -1   2  -1    1.83    2.24   2
  -1   2  -1   -0.48    1.62   3
  -2   2  -1  864.75   42.28   2
  -2   2  -1  841.19   41.81   3
   2  -2   1  838.54   51.10   1
  -3   2  -1  638.38   32.93   3
   3  -2   1  666.22   33.56   2
   3  -2   1  647.55   39.76   1
   4  -2   1   28.52    6.63   1
   4  -2   1   22.37    5.72   2
  -4   2  -1   23.88    4.61   3
   5  -2   1  287.60   17.00   2
   5  -2   1  233.82   19.09   1
  -5   2  -1  255.84   15.79   3
   6  -2   1   21.58    7.45   2
  -6   2  -1   15.87    5.13   3
  -7   2  -1  163.50   13.24   3
   7  -2   1  169.51   14.59   2
  -6  -1   1  458.69   25.70   3
   6   1  -1  456.84   31.01   1
  -5  -1   1   32.48    5.15   3
   5   1  -1   35.04    7.47   1
   4   1  -1  749.01   37.95   2
   4   1  -1  750.70   46.02   1
  -4  -1   1  735.58   37.83   3
   3   1  -1    6.22    4.38   1
  -3  -1   1    0.95    2.81   3
   3   1  -1   -1.02    3.16   2
  -2  -1   1 1938.58   97.23   3
   2   1  -1 2071.17   97.98   2
   2   1  -1 2019.84  117.83   1
   1   1  -1 4718.06  273.45   1
   1   1  -1 4973.80  228.11   2
  -1  -1   1 4433.38  226.06   3
   0   1  -1  996.94   49.12   2
   0   1  -1 1021.71   59.01   1
  -1   1  -1 6532.39  311.59   3
  -1   1  -1 6453.29  314.17   2
  -2   1  -1  488.45   24.95   2
   2  -1   1  486.90   29.98   1
  -2   1  -1  496.63   24.78   3
  -3   1  -1  591.17   30.51   3
   3  -1   1  597.00   37.02   1
   3  -1   1  611.60   30.78   2
   4  -1   1  988.29   47.22   2
   4  -1   1  985.18   56.47   1
  -4   1  -1  818.25   46.64   3
   5  -1   1   32.62    7.02   1
   5  -1   1   28.07    6.35   2
  -5   1  -1   25.81    5.23   3
   6  -1   1  120.06   11.97   1
  -6   1  -1  111.67    9.74   3
  -7   1  -1  269.26   17.86   3
  -7   0   1  129.85   11.59   3
  -6   0   1   29.23    5.77   3
   5   0  -1  132.34   11.53   2
   5   0  -1  145.75   13.54   1
  -5   0   1  147.80   10.58   3
   4   0  -1 3018.15  146.80   2
  -4   0   1 2945.31  145.65   3
   4   0  -1 3036.96  175.84   1
   3   0  -1  282.40   20.02   1
   3   0  -1  320.97   16.75   2
  -3   0   1  298.16   16.28   3
  -2   0   1 3939.71  191.33   3
   2   0  -1 3995.65  231.14   1
   2   0  -1 3991.95  192.96   2
   1   0  -1   11.83    2.04   1
  -1   0   1   10.13    1.59   3
   1   0  -1    5.74    1.89   2
   1   0   1   21.62    3.22   1
  -1   0  -1   17.56    2.02   3
  -1   0  -1   20.97    2.01   2
  -2   0  -1   32.81    3.38   3
   2   0   1   37.63    3.54   2
   2   0   1   39.50    5.03   1
  -3   0  -1  376.27   20.31   3
   3   0   1  401.68   25.43   1
   3   0   1  385.13   20.43   2
   4   0   1   45.80    7.19   1
   4   0   1   43.41    5.52   2
  -4   0  -1   33.25    4.86   3
  -5   0  -1 1108.67   56.06   3
   5   0   1 1100.33   56.34   2
   5   0   1 1137.55   67.96   1
  -6   0  -1   -0.10    4.50   3
   6   0   1   10.21    6.76   1
  -7   0  -1  557.32   31.25   3
  -7   1   1    0.15    5.59   3
  -6   1   1  727.68   37.30   3
   6  -1  -1  677.54   37.74   2
   5  -1  -1   92.54    9.33   1
   5  -1  -1   82.91    8.83   2
  -5   1   1   92.81    8.13   3
   4  -1  -1 3125.24  153.20   2
  -4   1   1 3108.68  151.97   3
   4  -1  -1 3153.31  182.99   1
   3  -1  -1 2042.69   99.08   2
   3  -1  -1 1974.71  118.11   1
  -3   1   1 2036.68   98.21   3
   2  -1  -1 4445.99  214.60   2
   2  -1  -1 4398.30  256.75   1
  -2   1   1 4421.61  212.74   3
   1  -1  -1 7353.49  352.40   2
  -1   1   1 7212.79  349.41   3
   0  -1  -1  766.07   35.95   3
   0   1   1  710.58   43.22   1
   1   1   1 6202.82  366.65   1
  -1  -1  -1 6432.02  303.34   3
   2   1   1  136.56    7.63   2
  -2  -1  -1  123.45    8.08   3
   2   1   1  120.09   11.10   1
  -3  -1  -1  182.72   11.25   3
   3   1   1  193.66   15.45   1
   3   1   1  185.92   11.05   2
   4   1   1  522.26   32.81   1
  -4  -1  -1  480.54   26.26   3
   4   1   1  503.81   26.16   2
  -5  -1  -1    6.70    4.27   3
   5   1   1   11.69    6.80   1
  -6  -1  -1    1.42    4.57   3
   6   1   1    8.15    7.21   1
   7  -2  -1  151.95   13.64   2
  -7   2   1  155.41   13.30   3
   6  -2  -1   13.78    7.27   2
  -6   2   1   23.13    5.59   3
   5  -2  -1   16.64    6.59   2
  -5   2   1   13.71    4.85   3
   4  -2  -1  174.11   12.54   2
  -4   2   1  172.66   11.25   3
   4  -2  -1  158.82   13.47   1
   3  -2  -1  101.51    9.72   1
  -3   2   1  105.61    7.66   3
   3  -2  -1   96.22    8.71   2
  -2   2   1 1000.84   49.55   3
   2  -2  -1  972.21   50.09   2
   2  -2  -1 1050.62   59.50   1
   1  -2  -1  601.59   30.44   2
  -1   2   1  623.94   36.05   1
  -1   2   1  599.71   30.19   3
   0   2   1 1298.44   76.36   1
   0  -2  -1 1310.30   63.42   3
   1   2   1    2.02    2.91   1
  -1  -2  -1    4.66    2.71   3
   2   2   1  131.35   11.30   1
  -2  -2  -1  122.08    8.51   3
   3   2   1  975.27   59.30   1
  -3  -2  -1  979.03   48.60   3
   4   2   1  126.39   12.36   1
  -4  -2  -1  136.39    9.61   3
   5   2   1 1370.26   85.91   1
  -5  -2  -1 1467.50   70.82   3
  -6  -2  -1   66.39    7.74   3
   6   2   1   74.02   10.98   1
  -7   3   1   44.82    8.58   3
   7  -3  -1   32.20    9.18   2
  -6   3   1 1258.64   63.82   3
   6  -3  -1 1237.28   64.56   2
   5  -3  -1  270.27   18.13   2
  -5   3   1  277.33   16.92   3
   4  -3  -1 3105.41  152.60   2
  -4   3   1 3109.67  151.33   3
   3  -3  -1  498.62   29.81   1
   3  -3  -1  474.10   25.78   2
  -3   3   1  459.57   25.00   3
   2  -3  -1 1233.13   77.92   1
  -2   3   1 1358.63   64.78   3
   2  -3  -1 1375.79   65.48   2
  -1   3   1 2265.78  131.65   1
   1  -3  -1 2233.47  110.05   2
  -1   3   1 2272.47  109.34   3
   0  -3  -1  313.91   16.82   3
   0   3   1  302.31   19.36   1
   1   3   1  701.53   40.69   1
  -1  -3  -1  636.56   33.93   3
   2   3   1  318.67   21.76   1
  -2  -3  -1  340.21   18.26   3
  -3  -3  -1  671.77   34.83   3
   3   3   1  695.15   42.70   1
   4   3   1   -2.05    6.00   1
  -4  -3  -1   -2.15    4.04   3
   5   3   1   69.12   10.68   1
  -5  -3  -1   79.51    7.82   3
   6   3   1   44.10   10.84   1
  -6  -3  -1   48.45    7.02   3
   6  -4  -1   22.50    8.78   2
  -6   4   1   11.17    6.12   3
  -5   4   1  198.31   14.16   3
   5  -4  -1  211.90   15.92   2
  -4   4   1   48.59    6.68   3
   4  -4  -1   55.29    7.76   2
  -3   4   1 1304.46   65.42   3
   3  -4  -1 1334.67   66.16   2
  -2   4   1  346.83   18.73   3
  -2   4   1  353.47   22.26   1
   2  -4  -1  331.54   19.18   2
  -1   4   1  895.96   52.76   1
  -1   4   1  915.68   44.21   3
   1  -4  -1  840.41   44.09   2
   0  -4  -1  167.36   10.47   2
   0  -4  -1  207.91   12.91   3
   0   4   1  189.11   13.54   1
  -1  -4  -1   39.09    6.01   3
   1   4   1   40.65    6.14   1
   2   4   1  430.44   29.05   1
  -2  -4  -1  459.80   24.21   3
   3   4   1  516.89   34.97   1
  -3  -4  -1  558.75   28.44   3
  -4  -4  -1   30.97    5.90   3
   4   4   1   21.90    7.84   1
   5   4   1  502.47   34.94   1
  -6   5   1  638.41   36.47   3
   6  -5  -1  676.05   38.09   2
   5  -5  -1   56.75    9.84   2
  -5   5   1   53.99    8.11   3
   4  -5  -1  708.91   38.16   2
  -4   5   1  714.20   37.51   3
  -3   5   1  126.46   10.30   3
   3  -5  -1  145.80   11.65   2
   2  -5  -1  134.03   10.67   2
  -2   5   1  138.13   10.12   3
  -1   5   1  279.28   19.30   1
   1  -5  -1  276.34   16.23   2
   1  -5  -1  314.27   17.02   3
   0  -5  -1   16.80    7.51   3
   0   5   1    4.44    4.86   1
   1   5   1 1463.50   83.22   1
  -1  -5  -1 1308.77   69.21   3
   2   5   1    1.37    6.05   1
  -2  -5  -1    1.45    5.04   3
  -3  -5  -1  577.24   30.41   3
   3   5   1  567.49   37.76   1
   4   5   1   53.89   10.30   1
  -5   6   1  289.26   19.22   3
   5  -6  -1  291.43   21.04   2
   4  -6  -1   40.10    8.67   2
  -4   6   1   58.28    7.92   3
  -3   6   1  702.45   37.97   3
   3  -6  -1  749.19   38.48   2
   1  -6  -1  127.72   11.68   3
   0  -6  -1  181.78   14.96   3
   0   6   1  158.93   14.38   1
  -1  -6  -1   12.39    6.62   3
   1   6   1   10.74    6.60   1
   2   6   1   10.70    7.22   1
   3   6   1  148.70   14.97   1
  -4   7   1  143.03   12.35   3
  -3   7   1   -2.57    6.43   3
   2  -7  -1   93.35   11.10   3
   1  -7  -1  271.66   20.96   3
   1   7   1  602.99   39.81   1
   2   7   1   63.81   10.68   1
   2   7  -2   75.01   10.72   1
   1   7  -2    6.58    7.12   1
   0   7  -2  268.37   20.49   1
  -3   7  -2    8.52    6.01   3
   3  -7   2    3.96    6.08   2
   4  -7   2   63.22    9.90   2
  -4   7  -2   58.15    8.82   3
   3   6  -2   76.85   10.82   1
   2   6  -2  934.98   58.31   1
   1   6  -2  116.44   11.76   1
   0   6  -2  714.18   44.47   1
   1  -6   2  723.70   36.59   3
  -1   6  -2  662.10   43.18   1
  -2   6  -2   86.83    8.44   3
  -2   6  -2   89.56    9.16   2
  -3   6  -2  368.27   21.63   3
   3  -6   2  389.24   22.34   2
   4  -6   2   55.73    8.77   2
  -4   6  -2   58.01    7.99   3
   5  -6   2  172.21   15.23   2
  -5   6  -2  194.50   14.48   3
   4   5  -2   69.47   11.03   1
   3   5  -2   52.28    9.01   1
   2   5  -2    3.72    5.67   1
   1   5  -2  611.73   38.91   1
  -1  -5   2  627.76   31.93   3
   0   5  -2  116.56   10.52   1
   0  -5   2  114.06   10.10   3
  -1   5  -2  472.66   25.06   2
  -1   5  -2  471.02   24.98   3
  -1   5  -2  465.79   29.94   1
  -2   5  -2  146.64   10.75   3
  -2   5  -2  163.20   13.37   1
  -2   5  -2  173.26   12.01   2
   3  -5   2   27.31   10.62   1
  -3   5  -2   24.25    5.17   3
   4  -5   2  228.53   15.40   2
  -4   5  -2  174.46   13.21   3
  -5   5  -2  312.50   19.68   3
   5  -5   2  323.97   21.12   2
  -6   5  -2   52.92    8.27   3
   6  -5   2   39.97    9.68   2
   5   4  -2   12.85    8.82   1
   4   4  -2  789.04   50.04   1
   3   4  -2  191.49   15.90   1
  -2  -4   2 2718.64  129.70   3
   2   4  -2 2636.21  157.57   1
  -1  -4   2  158.44    9.50   3
   1   4  -2  123.95   11.45   1
   0   4  -2  425.64   20.89   2
   0   4  -2  372.47   25.03   1
   0  -4   2  387.23   21.18   3
  -1   4  -2  719.44   35.71   3
  -1   4  -2  716.98   36.22   2
  -1   4  -2  701.23   43.27   1
  -2   4  -2   10.31    3.33   3
   2  -4   2    5.34    5.56   1
  -2   4  -2    1.35    4.08   2
  -3   4  -2  677.54   34.40   3
  -3   4  -2  731.22   35.19   2
   3  -4   2  591.93   43.22   1
   4  -4   2   18.76    6.55   2
  -4   4  -2   17.12    5.06   3
  -5   4  -2  526.51   29.49   3
   5  -4   2  553.56   30.50   2
   6  -4   2    7.47    8.05   2
  -6   4  -2    1.65    5.18   3
   6   3  -2  409.73   29.88   1
   5   3  -2    7.75    6.75   1
  -4  -3   2  542.60   29.82   3
   4   3  -2  622.68   37.66   1
   3   3  -2  920.41   55.85   1
  -3  -3   2  904.58   45.42   3
   2   3  -2  818.33   39.41   2
  -2  -3   2  764.69   39.23   3
   2   3  -2  800.63   48.40   1
   1   3  -2 2699.26  161.25   1
  -1  -3   2 2795.74  133.12   3
   1   3  -2 2779.91  133.98   2
   0   3  -2   64.41    6.72   1
   0  -3   2   60.79    5.13   3
   0   3  -2   75.54    5.58   2
  -1   3  -2 1822.75   90.53   3
  -1   3  -2 1909.73   91.55   2
  -1   3  -2 1880.13  109.64   1
  -2   3  -2 1095.76   56.57   3
  -2   3  -2 1150.72   57.31   2
   2  -3   2 1221.59   69.39   1
  -3   3  -2   26.26    4.27   3
  -3   3  -2   16.76    4.40   2
   3  -3   2   22.39    6.67   1
   4  -3   2   98.59   10.05   1
   4  -3   2   72.47    8.34   2
  -4   3  -2   97.27    8.20   3
   5  -3   2  321.07   19.70   2
  -5   3  -2  302.60   18.42   3
   6  -3   2   65.47    9.61   2
  -6   3  -2   66.38    7.97   3
   7  -3   2  245.35   18.69   2
  -7   3  -2  289.12   18.33   3
   6   2  -2  169.62   15.96   1
  -5  -2   2   44.49    5.87   3
   5   2  -2   45.83    8.19   1
  -4  -2   2 1461.05   73.15   3
   4   2  -2 1512.38   89.00   1
   3   2  -2  172.97   14.33   1
  -3  -2   2  177.22   10.74   3
   3   2  -2  195.78   11.11   2
   2   2  -2 1753.50  103.46   1
   2   2  -2 1813.95   86.36   2
  -2  -2   2 1711.82   85.13   3
   1   2  -2  161.02    8.53   2
  -1  -2   2  140.37    8.32   3
   1   2  -2  146.45   10.72   1
   0   2  -2  419.54   19.94   3
   0   2  -2  393.31   20.21   2
   0   2  -2  391.11   24.49   1
  -1   2  -2    1.20    2.32   2
  -1   2  -2    2.89    1.71   3
  -1   2  -2   10.51    2.90   1
  -2   2  -2  467.87   23.24   3
  -2   2  -2  495.20   23.67   2
   2  -2   2  400.99   29.38   1
  -3   2  -2 3280.93  163.33   2
  -3   2  -2 3288.99  162.18   3
   3  -2   2 3485.67  195.89   1
   4  -2   2   42.58    7.91   1
  -4   2  -2   34.95    5.36   3
   4  -2   2   40.07    6.14   2
   5  -2   2 1527.48   89.93   1
  -5   2  -2 1477.87   74.69   3
   5  -2   2 1490.19   75.29   2
  -6   2  -2  216.23   14.34   3
   6  -2   2  206.04   15.32   2
   7  -2   2  414.51   25.27   2
  -7   2  -2  419.80   24.70   3
  -6  -1   2  861.96   46.22   3
   6   1  -2  930.83   55.91   1
  -5  -1   2  306.60   17.55   3
   5   1  -2  291.85   21.54   1
   4   1  -2 1919.47  112.44   1
  -4  -1   2 1918.62   93.00   3
   4   1  -2 1864.96   93.62   2
  -3  -1   2 2464.04  118.81   3
   3   1  -2 2427.85  119.72   2
   3   1  -2 2463.14  143.67   1
  -2  -1   2  462.43   22.48   3
   2   1  -2  431.77   27.45   1
   2   1  -2  448.45   22.75   2
  -1  -1   2 6974.47  338.16   3
   1   1  -2 7188.18  341.16   2
   1   1  -2 6983.05  408.81   1
   0   1  -2  687.42   32.90   2
   0   1  -2  654.16   39.41   1
  -1   1  -2 1037.30   51.10   2
   1  -1   2 1005.52   62.17   1
  -1   1  -2 1083.51   50.71   3
  -2   1  -2  992.11   50.44   2
  -2   1  -2 1020.35   50.22   3
   2  -1   2 1063.28   60.87   1
   3  -1   2    1.66    5.37   1
  -3   1  -2    1.78    2.63   3
   4  -1   2  182.81   12.57   2
  -4   1  -2  187.74   11.86   3
   4  -1   2  194.46   16.24   1
   5  -1   2    1.37    5.51   2
  -5   1  -2   -3.41    3.82   3
   5  -1   2    5.27    6.48   1
  -6   1  -2  153.52   11.81   3
   6  -1   2  170.88   16.19   1
   6  -1   2  157.38   13.08   2
  -7   1  -2   73.58    9.07   3
  -7   0   2    2.58    5.56   3
   6   0  -2    8.78    6.30   2
  -6   0   2    8.75    5.11   3
   5   0  -2  317.83   21.93   1
  -5   0   2  318.01   18.28   3
   5   0  -2  306.69   19.04   2
   4   0  -2  208.30   13.38   2
  -4   0   2  199.30   12.67   3
   4   0  -2  206.37   15.53   1
   3   0  -2  842.29   42.19   2
  -3   0   2  834.47   41.71   3
   3   0  -2  835.33   50.17   1
  -2   0   2  475.93   23.61   3
   2   0  -2  476.09   23.97   2
   2   0  -2  455.51   28.30   1
   1   0  -2  917.18   54.01   1
  -1   0   2  946.77   44.79   3
   1   0  -2  906.41   45.32   2
   0   0  -2  251.70   13.10   2
   0   0   2  251.48   15.67   1
   0   0  -2  243.14   12.77   3
  -1   0  -2 2133.62  105.54   3
  -1   0  -2 2153.59  106.24   2
   1   0   2 2278.71  127.80   1
  -2   0  -2   15.84    2.76   2
  -2   0  -2   16.53    2.73   3
   2   0   2   11.90    4.31   1
  -3   0  -2 5768.44  276.90   3
   3   0   2 5803.38  278.89   2
   3   0   2 5680.93  334.75   1
   4   0   2  587.24   30.80   2
  -4   0  -2  590.89   30.79   3
   4   0   2  609.85   38.11   1
  -5   0  -2 1888.36   92.74   3
   5   0   2 1838.91  112.00   1
   5   0   2 1915.00   93.13   2
  -6   0  -2   55.37    7.03   3
   6   0   2   50.65    9.50   1
  -7   0  -2  230.40   16.20   3
  -7   1   2   54.52    8.40   3
   7  -1  -2   45.09    8.78   2
  -6   1   2 1287.08   64.81   3
   6  -1  -2 1271.15   65.37   2
   5  -1  -2  305.94   19.07   2
  -5   1   2  311.64   18.09   3
  -4   1   2  583.96   30.02   3
   4  -1  -2  564.11   30.63   2
   4  -1  -2  580.74   35.84   1
   3  -1  -2 1094.06   55.22   2
   3  -1  -2 1107.00   65.29   1
  -3   1   2 1111.05   54.52   3
   2  -1  -2  765.88   45.17   1
   2  -1  -2  785.17   38.43   2
  -2   1   2  747.38   37.80   3
  -1   1   2 1898.57   92.80   3
   1  -1  -2 1935.64   93.68   2
   0   1   2 1579.64   93.05   1
   0  -1  -2 1649.71   77.27   3
   0  -1  -2 1539.78   77.51   2
   1   1   2  756.32   46.72   1
  -1  -1  -2  805.30   38.63   3
   2   1   2   23.56    2.70   2
   2   1   2   26.10    5.06   1
  -2  -1  -2   34.91    3.43   3
  -3  -1  -2  817.56   39.54   3
   3   1   2  757.59   48.02   1
   3   1   2  779.41   39.13   2
  -4  -1  -2  406.33   21.97   3
   4   1   2  406.55   27.76   1
  -5  -1  -2   76.81    7.54   3
   5   1   2   76.57   10.27   1
  -6  -1  -2  463.19   25.30   3
   6   1   2  434.00   30.76   1
  -7   2   2   69.47    9.47   3
   7  -2  -2   53.99    9.77   2
  -6   2   2  144.25   11.72   3
   6  -2  -2  146.25   12.86   2
   5  -2  -2 1411.86   71.20   2
  -5   2   2 1403.26   70.50   3
   4  -2  -2   -2.50    5.41   2
  -4   2   2    0.39    3.77   3
   3  -2  -2 1509.33   74.05   2
   3  -2  -2 1480.35   87.44   1
  -3   2   2 1488.36   73.20   3
  -2   2   2    8.12    2.71   3
   2  -2  -2    4.97    3.55   2
  -1   2   2  313.81   19.28   1
  -1   2   2  316.52   16.63   3
   1  -2  -2  323.53   16.78   2
   0   2   2  629.53   38.78   1
   0  -2  -2  688.85   32.70   3
   0  -2  -2  639.50   32.15   2
   1   2   2 1599.36   88.84   1
  -1  -2  -2 1416.81   73.62   3
   2   2   2  342.92   24.03   1
  -2  -2  -2  393.75   19.83   3
  -3  -2  -2 1715.58   82.15   3
   3   2   2 1637.38   99.66   1
   4   2   2   26.49    7.16   1
  -4  -2  -2   22.06    4.70   3
   5   2   2  579.18   39.04   1
  -5  -2  -2  616.11   31.82   3
  -6  -2  -2    3.89    5.20   3
   6   2   2   -0.67    7.88   1
   7  -3  -2   -4.52    7.38   2
  -7   3   2    2.75    7.04   3
   6  -3  -2  396.46   25.55   2
  -6   3   2  441.34   24.87   3
   5  -3  -2    5.68    6.80   2
  -5   3   2   -0.66    4.60   3
  -4   3   2  365.61   20.29   3
   4  -3  -2  351.01   21.11   2
   3  -3  -2   45.76    6.39   2
  -3   3   2   63.36    5.91   3
   2  -3  -2  145.17   10.11   2
  -2   3   2  152.09    9.51   3
   2  -3  -2  140.36   11.60   1
  -1   3   2 2938.23  141.58   3
  -1   3   2 3022.65  170.51   1
   1  -3  -2 2822.12  142.41   2
   0  -3  -2  213.75   12.37   3
   0   3   2  192.73   13.55   1
   0  -3  -2  193.99   10.76   2
  -1  -3  -2 2610.39  137.62   3
   1   3   2 3061.30  166.04   1
  -2  -3  -2  145.00   10.22   3
   2   3   2  127.20   11.84   1
  -3  -3  -2 1632.26   78.72   3
   3   3   2 1567.89   95.48   1
   4   3   2  622.68   41.82   1
  -4  -3  -2  688.43   34.55   3
  -5  -3  -2  111.05    9.67   3
   5   3   2  108.78   12.64   1
   6   3   2  197.11   19.36   1
  -6  -3  -2  206.67   14.95   3
  -6   4   2   52.97    8.76   3
   6  -4  -2   60.54   10.17   2
   5  -4  -2 1002.28   51.07   2
  -5   4   2  937.01   50.07   3
  -4   4   2   11.44    5.31   3
   4  -4  -2   27.48    6.89   2
  -3   4   2  676.94   35.24   3
   3  -4  -2  689.94   35.79   2
  -2   4   2  818.53   40.63   3
   2  -4  -2  791.53   40.84   2
  -1   4   2   11.72    3.78   1
   1  -4  -2    4.17    3.75   2
   0   4   2    1.68    3.84   1
   0  -4  -2    4.63    5.34   3
   1   4   2  141.19   11.35   1
  -1  -4  -2  113.24   10.46   3
   2   4   2   39.66    6.88   1
  -2  -4  -2   33.36    6.20   3
   3   4   2  315.37   23.30   1
  -3  -4  -2  336.46   18.92   3
  -4  -4  -2  138.12   11.31   3
   4   4   2  137.43   14.25   1
   5   4   2  153.60   16.56   1
  -5  -4  -2  178.60   13.02   3
   6  -5  -2   54.61   11.98   2
  -6   5   2   68.81    9.37   3
  -5   5   2   26.33    7.16   3
   5  -5  -2   40.20    9.21   2
   4  -5  -2   10.29    6.95   2
  -4   5   2    9.42    5.56   3
  -3   5   2  215.56   14.05   3
   3  -5  -2  213.74   14.62   2
   2  -5  -2   31.62    5.65   2
  -2   5   2   32.50    5.62   3
   1  -5  -2 1598.50   78.80   3
  -1   5   2 1590.72   94.22   1
   0   5   2  109.44   10.74   1
   0  -5  -2  113.54   11.71   3
   1   5   2 1976.06  114.36   1
  -1  -5  -2 1872.79   95.19   3
  -2  -5  -2  195.42   13.98   3
   2   5   2  182.36   15.82   1
   3   5   2  425.58   29.97   1
  -3  -5  -2  437.01   24.18   3
   4   5   2  280.53   22.39   1
   5  -6  -2  261.68   19.81   2
  -5   6   2  256.12   17.72   3
   4  -6  -2   12.10    7.67   2
  -4   6   2   26.62    6.85   3
   3  -6  -2  314.57   19.09   2
  -3   6   2  295.43   18.37   3
   2  -6  -2    4.53    5.87   3
   1  -6  -2  151.43   12.91   3
   0   6   2   68.73    9.04   1
   0  -6  -2   61.54   10.51   3
  -1  -6  -2   14.93    7.52   3
   1   6   2   26.00    7.66   1
  -2  -6  -2  313.17   19.50   3
   2   6   2  288.63   22.54   1
   3   6   2   23.77    8.32   1
  -4   7   2    9.18    6.67   3
   2  -7  -2   52.76    9.63   3
   1  -7  -2  451.52   29.15   3
   0  -7  -2    4.08    9.18   3
   2   7   2   56.09   10.09   1
   0   8  -3  142.51   14.56   1
   2   7  -3   -1.47    6.84   1
   1   7  -3  185.88   16.07   1
   0   7  -3   79.37   10.33   1
  -1   7  -3   80.39   10.84   1
   3  -7   3   70.26    8.78   2
  -4   7  -3   43.73    7.47   3
   4  -7   3   32.48    8.64   2
   3   6  -3   55.88    9.85   1
   2   6  -3  299.86   22.25   1
   1   6  -3  181.45   15.34   1
   0   6  -3   73.61    9.00   1
  -1   6  -3  814.50   50.44   1
  -2   6  -3    2.94    6.32   1
  -2   6  -3    4.80    5.15   3
  -2   6  -3   10.74    6.53   2
  -3   6  -3  947.06   48.36   2
  -3   6  -3  899.32   47.19   3
   4  -6   3   11.35    7.13   2
  -4   6  -3   20.24    6.48   3
  -5   6  -3  440.80   25.44   3
   5  -6   3  411.95   26.57   2
   5   5  -3  162.20   17.03   1
   4   5  -3  155.23   15.57   1
   3   5  -3  604.76   39.29   1
   2   5  -3    1.13    5.50   1
   1   5  -3 1042.64   63.19   1
   0   5  -3  125.34   10.92   1
   0  -5   3  118.08   10.03   3
  -1   5  -3   11.31    4.25   3
  -1   5  -3    7.14    5.31   1
  -1   5  -3   -0.87    4.52   2
  -2   5  -3   92.21    8.40   2
  -2   5  -3   92.92    7.94   3
  -3   5  -3   58.04    7.48   2
   3  -5   3   50.85   12.56   1
  -3   5  -3   46.66    6.12   3
  -4   5  -3   -1.81    4.81   3
   4  -5   3    8.92    6.35   2
   5  -5   3  472.78   27.67   2
  -5   5  -3  461.80   26.69   3
   6  -5   3   26.11    8.86   2
  -6   5  -3   19.88    6.76   3
   5   4  -3   47.22   10.04   1
   4   4  -3  207.39   17.51   1
   3   4  -3    7.58    6.06   1
   2   4  -3  307.33   21.73   1
  -2  -4   3  319.66   16.81   3
   1   4  -3   31.85    5.51   1
   1   4  -3   29.30    3.69   2
  -1  -4   3   28.46    4.01   3
   0  -4   3    4.54    3.70   3
   0   4  -3    7.78    3.52   2
   0   4  -3    5.83    3.85   1
  -1   4  -3 2604.20  123.60   3
  -1   4  -3 2467.01  149.56   1
  -1   4  -3 2586.86  124.87   2
  -2   4  -3  326.08   17.74   3
   2  -4   3  333.26   23.13   1
  -2   4  -3  326.31   18.64   2
   3  -4   3 1881.18  121.71   1
  -3   4  -3 2072.97   99.95   3
  -3   4  -3 2169.90  101.11   2
   4  -4   3  289.49   23.35   1
  -4   4  -3  291.66   17.31   3
  -5   4  -3 1135.87   58.04   3
   6  -4   3  402.23   24.67   2
  -6   4  -3  381.63   23.35   3
   6   3  -3  444.99   31.70   1
   5   3  -3  372.81   26.58   1
   4   3  -3  342.38   24.22   1
   3   3  -3 1681.12   97.93   1
  -3  -3   3 1607.50   80.11   3
  -2  -3   3    6.45    2.51   3
   2   3  -3   15.59    3.48   2
   2   3  -3   12.71    4.73   1
  -1  -3   3 1013.11   48.92   3
   1   3  -3 1020.76   49.50   2
   1   3  -3  973.25   59.80   1
   0   3  -3  216.87   12.26   2
   0   3  -3  232.06   14.98   1
   0  -3   3  224.90   11.95   3
  -1   3  -3  470.56   24.19   2
  -1   3  -3  473.39   29.10   1
  -1   3  -3  464.38   23.55   3
  -2   3  -3   92.32    6.98   3
   2  -3   3  110.45   10.51   1
  -2   3  -3   92.82    7.86   2
  -3   3  -3    5.32    4.06   2
   3  -3   3    6.79    6.92   1
  -3   3  -3    0.12    3.20   3
  -4   3  -3  434.52   24.44   3
   4  -3   3  476.01   30.72   1
   5  -3   3   19.44    6.90   2
  -5   3  -3   15.07    5.03   3
   5  -3   3   11.60    8.55   1
   6  -3   3  227.15   16.94   2
  -6   3  -3  235.60   15.60   3
   6   2  -3   32.95    8.50   1
  -5  -2   3  382.81   21.51   3
   5   2  -3  396.37   26.86   1
   4   2  -3  140.91   12.44   1
  -4  -2   3  125.39    9.26   3
  -3  -2   3  879.43   44.89   3
   3   2  -3  903.84   54.93   1
   3   2  -3  940.19   45.53   2
  -2  -2   3   71.67    5.44   3
   2   2  -3   81.63    6.81   2
   2   2  -3   71.96    6.99   1
   1   2  -3  245.75   12.92   2
   1   2  -3  236.82   15.50   1
  -1  -2   3  221.10   11.99   3
   0   2  -3   90.43    6.15   2
   0   2  -3   84.23    7.47   1
   0   2  -3  102.72    5.53   3
  -1   2  -3 3751.88  180.49   3
  -1   2  -3 3757.71  182.19   2
  -2   2  -3  671.65   33.55   3
  -2   2  -3  698.25   34.01   2
   2  -2   3  647.27   41.94   1
   3  -2   3 6721.30  381.81   1
  -3   2  -3 6439.31  315.84   3
  -3   2  -3 6520.12  318.25   2
  -4   2  -3  202.79   13.38   3
   4  -2   3  245.02   19.06   1
   4  -2   3  218.24   14.13   2
   5  -2   3  537.21   28.76   2
  -5   2  -3  485.54   28.04   3
   5  -2   3  550.94   34.91   1
   6  -2   3   85.93    9.71   2
  -6   2  -3   78.00    8.47   3
  -7   2  -3   56.50    8.16   3
  -6  -1   3  356.43   20.79   3
   5   1  -3  258.64   16.45   2
   5   1  -3  262.41   19.42   1
  -5  -1   3  275.17   15.98   3
  -4  -1   3   80.02    6.76   3
   4   1  -3   66.64    7.99   1
   4   1  -3   79.55    7.05   2
   3   1  -3 2436.15  143.86   1
   3   1  -3 2435.79  120.05   2
  -3  -1   3 2498.01  119.02   3
   2   1  -3   59.59    4.73   2
  -2  -1   3   43.88    3.89   3
   2   1  -3   46.18    5.11   1
   1   1  -3 2918.35  137.01   2
  -1  -1   3 2820.11  135.32   3
   1   1  -3 2698.09  163.78   1
   0   1  -3  362.33   18.26   2
   0   1  -3  354.35   21.83   1
  -1   1  -3 5894.27  275.36   3
  -1   1  -3 5573.22  277.57   2
   1  -1   3 5736.13  333.38   1
   2  -1   3 2001.45  111.97   1
  -2   1  -3 1867.16   92.28   3
  -2   1  -3 1841.59   92.81   2
  -3   1  -3 1643.11   80.14   2
  -3   1  -3 1583.72   79.76   3
   3  -1   3 1667.22   96.81   1
  -4   1  -3 2607.41  128.07   3
   4  -1   3 2620.66  154.93   1
   4  -1   3 2659.58  128.92   2
   5  -1   3   52.12    7.13   2
  -5   1  -3   46.66    6.07   3
   5  -1   3   53.35    9.38   1
  -6   1  -3  646.50   33.95   3
   6  -1   3  615.48   41.45   1
  -7   1  -3   12.12    6.17   3
  -7   0   3  423.91   24.97   3
  -6   0   3   24.14    5.55   3
   6   0  -3   33.20    7.33   2
  -5   0   3  924.59   45.57   3
   5   0  -3  891.01   54.28   1
   5   0  -3  858.03   45.98   2
  -4   0   3   70.80    6.67   3
   4   0  -3   81.20    7.77   1
   4   0  -3   71.95    7.40   2
   3   0  -3  389.87   24.47   1
   3   0  -3  387.95   21.12   2
  -3   0   3  393.25   20.50   3
  -2   0   3   -1.11    2.02   3
   2   0  -3    6.02    3.15   2
   2   0  -3    4.03    2.26   1
  -1   0   3 2890.65  138.38   3
   1   0  -3 2776.12  139.72   2
   1   0  -3 2956.88  167.19   1
   0   0   3  688.04   40.04   1
   0   0  -3  674.26   32.98   3
   0   0  -3  657.95   33.39   2
   1   0   3 6525.69  364.49   1
  -1   0  -3 5882.36  303.66   2
  -1   0  -3 6430.16  301.41   3
  -2   0  -3   70.66    5.38   2
   2   0   3   73.27    7.50   1
  -2   0  -3   67.25    5.23   3
   3   0   3 1554.62   92.85   1
   3   0   3 1578.89   76.72   2
  -3   0  -3 1553.67   76.49   3
   4   0   3   51.97    8.60   1
  -4   0  -3   51.70    5.78   3
   4   0   3   57.76    5.86   2
   5   0   3  150.38   15.47   1
  -5   0  -3  145.41   10.79   3
   6   0   3   39.77    9.45   1
  -6   0  -3   34.29    6.33   3
   7  -1  -3    2.97    7.24   2
  -7   1   3   16.97    6.74   3
  -6   1   3  142.74   11.65   3
   6  -1  -3  157.44   12.80   2
  -5   1   3   41.36    6.25   3
   5  -1  -3   51.18    7.66   2
   4  -1  -3   26.05    6.21   2
  -4   1   3   18.82    4.53   3
   4  -1  -3   25.12    4.68   1
  -3   1   3  665.31   34.21   3
   3  -1  -3  674.56   40.48   1
   3  -1  -3  698.28   35.02   2
  -2   1   3  402.40   20.58   3
   2  -1  -3  398.73   21.20   2
   1  -1  -3 9999.25  481.82   2
  -1   1   3 9920.38  477.77   3
   0  -1  -3 1228.91   59.77   2
   0   1   3 1205.47   71.83   1
   0  -1  -3 1241.43   59.84   3
  -1  -1  -3 4469.29  215.33   3
   1   1   3 4477.07  260.18   1
  -2  -1  -3 5440.75  260.14   3
   2   1   3 5371.68  314.66   1
   3   1   3 1573.54   79.80   2
  -3  -1  -3 1694.06   80.09   3
   3   1   3 1634.57   97.11   1
   4   1   3 1122.59   70.45   1
  -4  -1  -3 1201.45   58.04   3
  -5  -1  -3   23.83    5.40   3
   5   1   3   29.02    8.49   1
   6   1   3  449.09   32.05   1
  -6  -1  -3  474.34   26.07   3
  -7   2   3  374.42   23.28   3
   7  -2  -3  364.44   23.90   2
   6  -2  -3    1.39    7.34   2
  -6   2   3    3.18    5.53   3
   5  -2  -3  968.46   50.67   2
  -5   2   3  981.78   49.99   3
  -4   2   3  363.40   19.87   3
   4  -2  -3  343.82   20.76   2
   3  -2  -3   11.62    4.90   2
  -3   2   3    2.64    3.28   3
   2  -2  -3  494.94   25.88   2
  -2   2   3  499.96   25.40   3
   1  -2  -3  201.97   11.33   2
  -1   2   3  197.43   12.31   1
  -1   2   3  195.09   11.14   3
   0  -2  -3  102.74    7.51   3
   0   2   3   89.68    7.83   1
   0  -2  -3   93.35    5.94   2
  -1  -2  -3  389.96   23.00   3
   1   2   3  494.62   27.83   1
   2   2   3 1058.83   65.89   1
  -2  -2  -3 1139.12   54.61   3
  -3  -2  -3  149.69   11.01   3
   3   2   3  164.87   14.54   1
  -4  -2  -3  215.37   13.44   3
   4   2   3  180.39   16.99   1
  -5  -2  -3   22.93    5.48   3
   5   2   3   16.58    7.94   1
   6   2   3    0.80    8.84   1
  -6  -2  -3    5.71    5.56   3
  -7   3   3   74.70   10.21   3
   7  -3  -3   73.06   10.52   2
  -6   3   3   -3.62    5.68   3
   6  -3  -3    1.83    8.00   2
  -5   3   3    6.44    5.11   3
   5  -3  -3    0.25    6.89   2
   4  -3  -3    3.77    5.83   2
  -4   3   3    2.49    4.40   3
   3  -3  -3 2387.61  119.61   2
  -3   3   3 2478.50  118.63   3
  -2   3   3  125.43    8.49   3
   2  -3  -3  111.12    9.24   2
   1  -3  -3 5713.44  279.39   2
  -1   3   3 5907.02  334.58   1
  -1   3   3 5667.49  277.42   3
   0  -3  -3  715.38   35.61   3
   0   3   3  678.03   41.61   1
   0  -3  -3  690.99   34.33   2
  -1  -3  -3 2452.78  121.21   3
   1   3   3 2522.33  145.78   1
  -2  -3  -3  412.88   22.63   3
   2   3   3  410.31   27.11   1
   3   3   3  502.07   33.13   1
  -3  -3  -3  507.81   26.97   3
   4   3   3  839.19   53.53   1
  -4  -3  -3  868.33   43.94   3
  -5  -3  -3    6.20    5.05   3
   5   3   3   -2.54    7.47   1
  -6   4   3   13.38    7.27   3
   6  -4  -3   22.63    9.24   2
   5  -4  -3  244.56   17.95   2
  -5   4   3  266.55   17.06   3
   4  -4  -3   32.35    7.36   2
  -4   4   3   28.75    6.03   3
   3  -4  -3  543.55   29.94   2
  -3   4   3  579.96   29.73   3
   2  -4  -3  253.68   14.98   2
  -2   4   3  247.47   14.74   3
   1  -4  -3  169.53   11.21   2
  -1   4   3  194.68   13.00   1
   1  -4  -3  174.04   11.67   3
   0  -4  -3 2278.41  111.52   3
   0   4   3 2254.54  132.95   1
  -1  -4  -3   43.02    6.92   3
   1   4   3   43.31    6.56   1
   2   4   3 1075.31   65.36   1
  -2  -4  -3 1077.15   54.46   3
  -3  -4  -3   20.40    5.59   3
   3   4   3   11.34    6.87   1
   4   4   3  205.87   18.50   1
  -4  -4  -3  233.96   15.10   3
   5   4   3    3.65    9.26   1
  -5  -4  -3   21.76    6.46   3
  -6   5   3    1.79    6.32   3
   6  -5  -3  -13.18    9.43   2
  -5   5   3   44.60    8.01   3
   5  -5  -3   33.70    9.40   2
  -4   5   3   31.07    6.56   3
   4  -5  -3   22.56    7.52   2
   3  -5  -3  766.00   39.82   2
  -3   5   3  757.09   39.51   3
  -2   5   3    5.44    5.08   3
   2  -5  -3    5.97    5.24   2
   1  -5  -3 1217.02   61.06   3
   0   5   3   54.42    7.27   1
   0  -5  -3   58.52    9.84   3
  -1  -5  -3  413.49   23.46   3
   1   5   3  389.70   26.72   1
  -2  -5  -3  113.15   10.55   3
   2   5   3  107.04   11.71   1
   3   5   3   10.32    7.76   1
  -3  -5  -3   12.33    5.80   3
  -4  -5  -3  382.15   21.85   3
   4   5   3  335.92   26.64   1
   5  -6  -3  373.83   24.46   2
  -5   6   3  370.97   23.15   3
   4  -6  -3   29.71    8.32   2
  -4   6   3   26.89    7.05   3
   3  -6  -3  524.43   28.38   2
  -3   6   3  499.35   28.29   3
   2  -6  -3  424.89   24.09   3
   1  -6  -3  510.70   29.23   3
   0  -6  -3  951.24   50.45   3
  -1  -6  -3   58.24    9.15   3
  -2  -6  -3  480.69   27.97   3
   2   6   3  481.29   32.93   1
   3   6   3   -4.64    7.03   1
  -4   7   3   30.25    7.54   3
   3  -7  -3  173.63   14.77   3
   2  -7  -3   28.79    9.07   3
   1  -7  -3  104.00   14.46   3
   0  -7  -3   84.40   12.06   3
  -1  -7  -3   75.71   11.15   3
   0   8  -4   29.97    8.88   1
   2   7  -4    8.65    6.78   1
   1   7  -4  199.24   16.79   1
   0   7  -4   11.87    7.28   1
  -1   7  -4   15.70    7.97   1
   4  -7   4   38.18    8.83   2
   3   6  -4   36.55    8.96   1
   2   6  -4    7.49    6.74   1
   1   6  -4  411.22   27.53   1
   0   6  -4   69.81    8.79   1
  -1   6  -4 1466.24   88.01   1
  -2   6  -4   72.54    8.54   2
   3  -6   4 1009.32   66.67   1
  -3   6  -4 1042.37   53.06   3
  -3   6  -4 1074.39   54.10   2
  -4   6  -4  343.22   20.78   3
  -5   6  -4  238.33   16.44   3
   5  -6   4  207.35   17.26   2
   4   5  -4   29.86    8.88   1
   3   5  -4  653.27   42.04   1
   2   5  -4    0.75    5.55   1
   1   5  -4  739.75   45.80   1
   0   5  -4  163.24   10.53   2
   0   5  -4  146.06   12.63   1
  -1   5  -4   95.66    7.94   3
  -1   5  -4  107.73    9.09   2
  -1   5  -4   95.79    9.80   1
  -2   5  -4  613.26   32.87   2
  -2   5  -4  620.79   31.89   3
   2  -5   4  623.81   39.63   1
   3  -5   4  129.58   16.66   1
  -3   5  -4  143.29   11.66   2
  -3   5  -4  139.00   10.55   3
  -4   5  -4  942.21   49.03   3
  -4   5  -4  969.87   49.73   2
  -5   5  -4   12.16    6.02   3
   5  -5   4    0.77    7.15   2
  -6   5  -4  167.56   13.85   3
   6  -5   4  174.72   15.27   2
   5   4  -4  184.90   17.38   1
   4   4  -4    5.48    6.57   1
   3   4  -4   -2.11    5.27   1
   2   4  -4  104.80   10.70   1
   1   4  -4  970.65   47.44   2
   1   4  -4  935.89   57.46   1
  -1  -4   4  950.59   46.70   3
   0   4  -4   39.25    4.71   2
   0  -4   4   38.47    4.55   3
   0   4  -4   43.70    5.64   1
  -1   4  -4 3889.33  190.33   2
  -1   4  -4 3775.13  228.10   1
  -1   4  -4 4059.27  188.45   3
  -2   4  -4  501.07   26.57   2
  -2   4  -4  503.41   25.71   3
   2  -4   4  491.22   32.71   1
   3  -4   4  885.77   51.96   1
  -3   4  -4  725.55   40.78   3
  -3   4  -4  833.81   41.57   2
  -4   4  -4   45.35    6.50   3
  -4   4  -4   51.78    6.83   2
   4  -4   4   51.16   11.08   1
   5  -4   4   54.25    8.67   2
  -5   4  -4   61.41    7.82   3
   6  -4   4  148.20   13.39   2
  -6   4  -4  143.98   12.28   3
   6   3  -4   18.79    8.99   1
   5   3  -4  447.86   30.74   1
   4   3  -4   13.94    6.50   1
   3   3  -4 1585.31   94.50   1
  -2  -3   4   22.77    3.03   3
   2   3  -4   23.82    4.35   2
   2   3  -4   22.27    5.25   1
   1   3  -4 2600.88  122.35   2
  -1  -3   4 2566.39  120.83   3
   1   3  -4 2357.78  146.88   1
   0   3  -4  844.22   41.60   2
   0   3  -4  827.55   49.98   1
  -1   3  -4 4202.48  210.06   2
  -1   3  -4 4344.76  251.92   1
  -1   3  -4 4429.26  208.04   3
  -2   3  -4 3838.07  187.62   3
   2  -3   4 3990.10  228.07   1
  -2   3  -4 3849.34  189.43   2
   3  -3   4  437.59   34.16   1
  -3   3  -4  534.96   27.12   2
  -3   3  -4  549.92   26.83   3
   4  -3   4 1905.71  113.69   1
  -4   3  -4 1869.05   93.75   3
  -4   3  -4 1942.22   94.32   2
  -5   3  -4    4.23    4.57   3
   5  -3   4   -4.36    5.93   2
   5  -3   4   14.80    9.60   1
   6  -3   4  167.69   14.06   2
  -6   3  -4  133.27   11.49   3
   6   2  -4    9.38    6.82   1
   5   2  -4  311.98   22.45   1
   4   2  -4    2.71    5.18   1
  -4  -2   4    8.23    3.61   3
   4   2  -4    8.36    4.18   2
   3   2  -4    6.67    4.25   2
  -3  -2   4    9.20    3.02   3
   2   2  -4   33.75    5.44   2
  -2  -2   4    3.97    2.08   3
   2   2  -4   -0.57    3.36   1
   1   2  -4 3266.11  164.88   2
   1   2  -4 3513.34  197.57   1
   0   2  -4    2.54    1.15   3
   0   2  -4    4.24    2.50   2
   0   2  -4   -0.34    2.53   1
  -1   2  -4 2068.69  103.78   2
  -1   2  -4 2116.61  102.68   3
   1  -2   4 2203.02  124.79   1
  -2   2  -4 1040.51   51.25   2
   2  -2   4 1021.73   62.59   1
  -2   2  -4 1035.78   50.78   3
  -3   2  -4  232.19   13.77   3
   3  -2   4  251.93   19.79   1
  -3   2  -4  226.95   13.64   2
  -4   2  -4   87.33    7.21   2
   4  -2   4   84.91   11.25   1
  -4   2  -4   73.66    7.23   3
   5  -2   4    8.80    8.41   1
   5  -2   4    9.03    6.02   2
  -5   2  -4   -0.74    4.25   3
   6  -2   4  127.79   14.35   1
  -6   2  -4  130.85   10.68   3
   6  -2   4  116.64   11.54   2
  -7   2  -4   -2.25    5.18   3
  -6  -1   4    5.47    4.39   3
   5   1  -4  245.79   17.95   1
  -5  -1   4  244.14   14.68   3
   5   1  -4  229.37   15.44   2
   4   1  -4   22.85    4.96   2
  -4  -1   4   22.69    4.27   3
   4   1  -4   18.79    5.11   1
  -3  -1   4 4255.11  199.54   3
   3   1  -4 4205.59  241.21   1
   3   1  -4 3956.72  201.31   2
   2   1  -4  537.72   32.57   1
   2   1  -4  515.31   27.30   2
  -2  -1   4  554.52   26.68   3
   1   1  -4 3958.17  231.33   1
   1   1  -4 3999.82  193.56   2
   0   1  -4 5953.08  291.53   2
   0   1  -4 6084.26  349.34   1
  -1   1  -4 4104.24  197.39   3
   1  -1   4 4328.97  239.35   1
  -1   1  -4 3888.09  198.99   2
  -2   1  -4 5100.02  249.49   3
  -2   1  -4 5043.28  251.30   2
   2  -1   4 5415.52  302.11   1
  -3   1  -4   36.33    4.63   3
  -3   1  -4   44.54    4.47   2
   3  -1   4   40.89    8.44   1
   4  -1   4 1310.17   77.92   1
  -4   1  -4 1263.71   63.90   3
   5  -1   4   22.95    6.20   2
   5  -1   4   14.29    8.48   1
  -5   1  -4   15.78    4.89   3
   6  -1   4  214.07   19.67   1
  -6   1  -4  198.17   14.18   3
  -7   0   4  441.41   25.65   3
  -6   0   4    0.44    4.62   3
   6   0  -4    2.90    6.50   2
   5   0  -4  185.27   13.93   2
  -5   0   4  193.36   12.61   3
  -4   0   4   75.51    6.54   3
   4   0  -4   73.40    7.49   2
   4   0  -4   65.00    6.84   1
   3   0  -4  211.65   14.27   1
   3   0  -4  227.47   13.24   2
  -3   0   4  206.86   12.17   3
   2   0  -4 1163.05   57.40   2
   2   0  -4 1155.68   68.02   1
  -2   0   4 1159.38   56.56   3
   1   0  -4  112.05    7.58   1
   1   0  -4  112.22    7.32   2
  -1   0   4  112.81    6.57   3
   0   0   4 4913.02  283.78   1
   0   0  -4 4858.75  236.79   2
   0   0  -4 4882.81  234.74   3
  -1   0  -4   35.65    3.34   3
   1   0   4   41.60    5.26   1
  -1   0  -4   33.46    2.98   2
   2   0   4 2151.65  121.84   1
  -2   0  -4 1982.61  100.58   2
  -2   0  -4 2074.05  100.28   3
   3   0   4  112.57   11.54   1
  -3   0  -4  114.20    8.40   3
  -3   0  -4  119.63    8.15   2
   4   0   4  147.03   13.26   1
   4   0   4  131.98    9.63   2
  -4   0  -4  118.31    9.62   3
  -5   0  -4   16.43    4.85   3
   5   0   4   14.06    8.21   1
   6   0   4  222.48   20.53   1
  -6   0  -4  223.98   15.05   3
   7  -1  -4   30.02    8.67   2
  -7   1   4   24.70    7.51   3
  -6   1   4    1.71    4.94   3
   6  -1  -4    6.37    7.09   2
  -5   1   4  842.67   43.34   3
   5  -1  -4  838.82   44.13   2
  -4   1   4  105.33    8.57   3
   4  -1  -4  103.53    9.34   2
   3  -1  -4 3496.43  212.57   1
  -3   1   4 3752.04  176.87   3
   3  -1  -4 3740.70  178.66   2
  -2   1   4 1447.06   69.75   3
   2  -1  -4 1415.08   70.60   2
  -1   1   4 6856.30  329.09   3
   1  -1  -4 6852.25  331.88   2
   0   1   4  114.84    9.72   1
   0  -1  -4  122.44    8.74   3
   0  -1  -4  132.61    7.62   2
  -1  -1  -4 1267.02   65.58   3
   1   1   4 1386.15   79.22   1
  -1  -1  -4 1366.72   65.23   2
  -2  -1  -4 2730.86  126.76   2
   2   1   4 2541.26  153.12   1
  -2  -1  -4 2553.57  126.43   3
  -3  -1  -4   27.55    4.58   3
   3   1   4   22.88    6.92   1
   4   1   4  409.13   29.51   1
  -4  -1  -4  455.04   23.63   3
  -5  -1  -4   51.10    6.85   3
   5   1   4   55.70   10.37   1
  -6  -1  -4  387.35   22.16   3
   6   1   4  349.23   27.33   1
  -7   2   4  233.90   16.83   3
   7  -2  -4  193.82   17.24   2
   6  -2  -4   83.23   10.31   2
  -6   2   4   67.56    8.79   3
   5  -2  -4  825.26   43.09   2
  -5   2   4  800.32   42.25   3
  -4   2   4  216.12   13.93   3
   4  -2  -4  232.20   15.43   2
  -3   2   4  994.05   50.57   3
   3  -2  -4 1037.81   51.43   2
   2  -2  -4 4490.90  215.82   2
  -2   2   4 4385.75  213.89   3
   1  -2  -4 1337.39   65.66   2
  -1   2   4 1335.89   65.28   3
   0  -2  -4 5414.96  260.98   3
   0   2   4 5456.51  314.49   1
   0  -2  -4 5375.22  262.14   2
  -1  -2  -4   57.06    5.80   3
   1   2   4   59.76    6.48   1
  -2  -2  -4 2251.14  106.94   3
   2   2   4 2132.07  129.09   1
   3   2   4   -0.97    6.28   1
  -3  -2  -4   -1.39    3.67   3
  -4  -2  -4   22.64    5.59   3
   4   2   4    9.26    7.46   1
  -5  -2  -4    2.53    4.89   3
   5   2   4   -5.18    7.55   1
  -6  -2  -4   66.97    8.98   3
   6   2   4   83.02   13.08   1
   6  -3  -4    2.78    8.03   2
  -6   3   4    1.03    6.07   3
  -5   3   4  575.89   31.59   3
   5  -3  -4  586.07   32.58   2
  -4   3   4   -2.58    4.45   3
   4  -3  -4    1.17    5.78   2
   3  -3  -4 1805.40   89.63   2
  -3   3   4 1810.51   88.76   3
  -2   3   4   72.26    6.32   3
   2  -3  -4   77.87    6.99   2
  -1   3   4  993.95   58.33   1
   1  -3  -4  985.67   49.23   2
   0   3   4   67.98    7.17   1
   0  -3  -4   90.24    7.79   3
   0  -3  -4   68.49    5.65   2
  -1  -3  -4    9.72    5.04   3
   1   3   4   12.46    4.88   1
  -2  -3  -4  276.61   16.68   3
   2   3   4  270.24   19.95   1
   3   3   4    9.45    6.78   1
  -3  -3  -4   12.68    4.89   3
   4   3   4  867.90   56.99   1
  -4  -3  -4  951.85   46.94   3
  -5  -3  -4    7.31    5.54   3
   5   3   4    0.92    8.35   1
  -6   4   4   26.90    8.29   3
   6  -4  -4   36.95   10.13   2
  -5   4   4  606.36   33.13   3
   5  -4  -4  600.33   33.74   2
  -4   4   4  598.12   32.08   3
   4  -4  -4  593.71   32.50   2
  -3   4   4 1073.18   53.60   3
   3  -4  -4 1055.54   54.02   2
   2  -4  -4 2667.39  130.78   2
  -2   4   4 2673.40  130.00   3
   1  -4  -4  340.76   18.41   2
   1  -4  -4  325.71   18.53   3
   0   4   4 2238.97  124.92   1
   0  -4  -4 1996.89  104.86   3
   1   4   4    2.68    4.74   1
  -1  -4  -4   -1.39    5.24   3
   2   4   4  568.29   33.98   1
  -2  -4  -4  474.52   28.41   3
   3   4   4    1.48    6.63   1
  -3  -4  -4    6.39    5.32   3
   4   4   4   45.91    9.63   1
  -4  -4  -4   45.35    7.64   3
   5   4   4   70.04   11.08   1
  -5  -4  -4   67.50    9.18   3
  -6   5   4   64.94   10.68   3
   6  -5  -4   59.93   11.88   2
  -5   5   4   16.47    7.22   3
   5  -5  -4   22.28    8.71   2
   4  -5  -4   87.65    9.84   2
  -4   5   4   91.30    9.37   3
   3  -5  -4   85.43    8.70   2
  -3   5   4   73.00    7.97   3
   2  -5  -4  490.54   26.42   2
   1  -5  -4    8.88    5.72   3
   0  -5  -4   28.67    8.48   3
   0   5   4   12.48    5.56   1
  -1  -5  -4   -3.85    6.35   3
   1   5   4    4.63    5.95   1
   2   5   4  147.84   14.11   1
  -2  -5  -4  139.86   12.35   3
   3   5   4   -4.91    7.25   1
  -3  -5  -4    2.36    6.02   3
   4   5   4  365.07   28.76   1
  -4  -5  -4  423.40   23.91   3
   5  -6  -4  411.75   26.71   2
  -5   6   4  435.28   25.59   3
  -4   6   4  191.25   14.26   3
   4  -6  -4  198.45   15.21   2
  -3   6   4  321.97   19.87   3
   2  -6  -4  503.27   27.83   3
   1  -6  -4   57.49    9.74   3
   0  -6  -4  690.55   38.23   3
  -1  -6  -4    6.35    7.56   3
   1   6   4   43.18    8.72   1
  -2  -6  -4  315.28   21.48   3
   2   6   4  342.73   24.87   1
   3   6   4   54.93   10.47   1
  -3  -6  -4   55.38    8.96   3
   3  -7  -4    0.36    7.75   3
   2  -7  -4  250.28   18.91   3
   1  -7  -4  -11.02   10.15   3
   0  -7  -4   81.08   12.06   3
  -1  -7  -4  -13.92    8.62   3
   0   8  -5   14.15    7.84   1
  -1   8  -5  368.23   26.71   1
   2   7  -5   89.90   11.19   1
   1   7  -5  188.65   16.32   1
   0   7  -5  209.75   17.68   1
  -1   7  -5   69.28   10.58   1
   2  -7   5  885.78   56.49   1
  -3   7  -5   13.28    7.76   2
   4  -7   5  218.63   16.56   2
   3   6  -5   92.17   11.66   1
   2   6  -5   39.49    8.35   1
   1   6  -5  385.19   26.20   1
   0   6  -5    9.26    5.99   1
  -1   6  -5  517.31   34.98   1
  -1   6  -5  564.44   29.35   2
  -2   6  -5   -2.04    5.91   2
   2  -6   5    2.85    7.94   1
   3  -6   5   23.17   13.17   1
  -3   6  -5   36.54    7.75   2
  -4   6  -5  161.14   13.96   2
  -4   6  -5  169.53   13.06   3
  -5   6  -5    4.11    6.49   3
   4   5  -5   11.75    7.96   1
   3   5  -5  650.24   41.94   1
   2   5  -5  162.31   14.21   1
   1   5  -5 1049.66   63.54   1
   0   5  -5 1749.26   84.54   2
   0   5  -5 1675.43  101.68   1
  -1   5  -5  388.76   22.09   2
  -1   5  -5  415.41   26.85   1
  -2   5  -5 1619.75   82.08   2
   2  -5   5 1622.39   98.81   1
  -2   5  -5 1703.24   80.99   3
   3  -5   5   52.36   13.12   1
  -3   5  -5   60.42    6.79   3
  -3   5  -5   56.74    7.44   2
  -4   5  -5  524.13   26.45   3
  -4   5  -5  480.52   26.68   2
   4  -5   5  391.14   33.87   1
  -5   5  -5   11.09    6.40   3
   5  -5   5    8.95    6.89   2
   6  -5   5   19.28    8.13   2
  -6   5  -5   27.76    7.00   3
   5   4  -5  106.21   12.86   1
   4   4  -5  100.35   11.42   1
   3   4  -5   38.83    7.38   1
   2   4  -5  138.03   12.27   1
   1   4  -5  345.68   23.53   1
   1   4  -5  372.90   19.47   2
   0   4  -5 1006.20   48.19   2
   0   4  -5  994.05   58.07   1
   0  -4   5  897.69   47.30   3
  -1   4  -5    8.28    4.01   2
  -1   4  -5    2.39    2.80   3
  -1   4  -5    2.31    4.46   1
  -2   4  -5  378.20   22.23   2
  -2   4  -5  425.73   21.49   3
   2  -4   5  423.20   28.22   1
  -3   4  -5   21.17    4.79   3
  -3   4  -5   27.90    5.72   2
   3  -4   5   33.81   10.09   1
  -4   4  -5   18.66    5.62   2
  -4   4  -5   21.55    5.34   3
   4  -4   5   14.35   10.44   1
  -5   4  -5    5.79    5.43   3
   5  -4   5   15.42   10.47   1
   5  -4   5   12.99    6.73   2
  -6   4  -5  304.41   19.71   3
   6  -4   5  308.88   20.87   2
   6   3  -5   18.70    8.61   1
   5   3  -5  677.79   43.63   1
   4   3  -5   49.38    8.05   1
   3   3  -5 2079.27  117.57   1
   3   3  -5 1889.20   98.17   2
   2   3  -5  604.17   35.27   1
   2   3  -5  524.72   29.26   2
   1   3  -5 2988.21  143.31   2
   1   3  -5 2889.27  171.86   1
   0   3  -5 4779.10  277.61   1
   0   3  -5 4757.69  231.46   2
  -1   3  -5  398.86   22.14   2
  -1   3  -5  445.08   26.91   1
  -1   3  -5  429.39   21.34   3
   2  -3   5 1933.64  113.28   1
  -2   3  -5 1849.14   93.15   2
  -2   3  -5 1907.61   92.16   3
  -3   3  -5   51.08    5.37   3
  -3   3  -5   51.93    6.10   2
   3  -3   5   47.75    9.88   1
  -4   3  -5  582.53   31.13   2
   4  -3   5  611.33   39.56   1
  -4   3  -5  579.62   31.12   3
  -5   3  -5   21.47    5.73   3
   5  -3   5   23.14    6.62   2
   5  -3   5   29.57   11.03   1
   6  -3   5   74.94   10.23   2
  -6   3  -5   79.82    8.73   3
   5   2  -5  139.04   13.15   1
   4   2  -5  521.44   33.33   1
  -3  -2   5   68.73    5.96   3
   3   2  -5   74.26    7.07   2
   3   2  -5   66.39    7.34   1
  -2  -2   5 3420.87  157.34   3
   2   2  -5 3308.91  190.94   1
   2   2  -5 3070.40  160.08   2
   1   2  -5   48.76    5.42   2
   1   2  -5   69.67    6.48   1
   0   2  -5 4866.95  290.74   1
   0   2  -5 5138.24  242.69   2
   1  -2   5   62.05    7.07   1
  -1   2  -5   64.03    5.64   2
  -1   2  -5   69.53    4.83   3
   2  -2   5 1183.39   67.90   1
  -2   2  -5 1091.35   55.50   2
  -2   2  -5 1093.24   55.06   3
  -3   2  -5  269.94   15.19   3
   3  -2   5  256.30   22.16   1
  -3   2  -5  267.80   15.30   2
  -4   2  -5  252.27   15.12   3
   4  -2   5  253.24   21.67   1
  -4   2  -5  241.05   14.84   2
   5  -2   5   13.73    5.88   2
  -5   2  -5   -2.75    4.34   3
   5  -2   5   -1.65    9.26   1
   6  -2   5  543.91   36.79   1
   6  -2   5  503.99   29.35   2
  -6   2  -5  508.75   28.79   3
   5   1  -5  770.10   45.49   1
  -5  -1   5  705.80   37.57   3
   5   1  -5  721.78   38.27   2
   4   1  -5   34.13    5.58   1
   4   1  -5   35.09    5.46   2
  -4  -1   5   26.41    4.34   3
   3   1  -5 2741.47  159.32   1
  -3  -1   5 2753.06  131.73   3
   3   1  -5 2680.28  133.22   2
   2   1  -5  820.32   41.77   2
  -2  -1   5  826.12   40.77   3
   2   1  -5  858.52   49.74   1
   1   1  -5  143.14   11.06   2
   1   1  -5  167.49   10.78   1
   0   1  -5 1506.67   76.88   2
   0   1  -5 1628.23   75.65   3
  -1   1  -5  658.10   33.86   2
  -1   1  -5  665.55   33.54   3
   1  -1   5  718.65   41.87   1
   2  -1   5 1646.28  103.34   1
  -2   1  -5 1744.19   85.25   2
  -2   1  -5 1832.10   84.92   3
  -3   1  -5  825.18   41.58   3
   3  -1   5  863.53   51.70   1
  -3   1  -5  796.56   41.45   2
  -4   1  -5  623.25   33.46   3
  -4   1  -5  648.24   33.16   2
   4  -1   5  660.94   41.98   1
   5  -1   5  133.87   14.17   1
   5  -1   5  115.43    9.78   2
  -5   1  -5  108.75    9.64   3
  -6   1  -5  287.94   18.95   3
   6  -1   5  345.76   26.15   1
  -6   0   5   80.64    8.40   3
   6   0  -5   76.62    9.56   2
  -5   0   5  673.94   35.00   3
   5   0  -5  668.85   36.00   2
  -4   0   5 1545.29   77.63   3
   4   0  -5 1586.16   78.85   2
   4   0  -5 1607.18   93.08   1
   3   0  -5 1265.53   75.99   1
   3   0  -5 1302.64   64.45   2
  -3   0   5 1313.07   63.42   3
   2   0  -5 6456.30  368.13   1
  -2   0   5 6401.27  304.82   3
   2   0  -5 6175.06  307.69   2
   1   0  -5  197.24   12.70   1
  -1   0   5  206.67   10.55   3
   1   0  -5  187.89   11.20   2
   0   0   5 3029.57  177.56   1
   0   0  -5 3145.48  146.85   3
   0   0  -5 2967.63  148.14   2
   1   0   5  538.17   35.47   1
  -1   0  -5  600.97   28.69   2
  -1   0  -5  577.21   28.85   3
  -2   0  -5  249.29   14.12   2
  -2   0  -5  280.35   14.98   3
   2   0   5  292.27   20.30   1
  -3   0  -5   24.03    3.63   2
   3   0   5   23.73    8.26   1
  -3   0  -5   22.95    4.43   3
  -4   0  -5  206.35   13.24   3
   4   0   5  230.18   19.09   1
   4   0   5  195.03   12.54   2
   5   0   5   25.87    9.79   1
  -5   0  -5   35.24    5.92   3
   6   0   5  225.05   21.63   1
  -6   0  -5  241.99   15.87   3
   7  -1  -5   31.21    8.56   2
  -7   1   5   38.78    8.20   3
  -6   1   5   21.65    6.24   3
   6  -1  -5   21.82    7.94   2
  -5   1   5  667.20   35.08   3
   5  -1  -5  663.30   36.08   2
   4  -1  -5  386.87   22.22   2
  -4   1   5  376.58   20.93   3
   3  -1  -5  256.97   15.44   2
  -3   1   5  241.83   14.02   3
   2  -1  -5  456.85   24.12   2
  -2   1   5  461.25   23.48   3
  -1   1   5    6.45    2.47   3
   1  -1  -5    9.56    3.11   2
   0   1   5   11.02    3.77   1
   0  -1  -5   14.02    3.72   3
   0  -1  -5   19.65    3.70   2
  -1  -1  -5  964.17   45.15   2
  -1  -1  -5  775.45   45.61   3
   1   1   5 1024.83   55.62   1
  -2  -1  -5 1419.99   70.17   3
   2   1   5 1434.47   85.29   1
  -2  -1  -5 1436.27   69.78   2
  -3  -1  -5   60.13    6.21   3
   3   1   5   48.59    8.87   1
   4   1   5  891.33   56.17   1
  -4  -1  -5  903.93   45.81   3
   5   1   5  110.58   13.76   1
  -5  -1  -5  121.21   10.20   3
  -6  -1  -5  468.94   25.58   3
   6   1   5  397.06   31.71   1
  -7   2   5  434.76   25.53   3
   7  -2  -5  388.32   25.63   2
   6  -2  -5  186.99   16.02   2
  -6   2   5  195.10   14.17   3
   5  -2  -5  823.54   44.06   2
  -5   2   5  837.82   43.17   3
  -4   2   5 2574.22  123.68   3
   4  -2  -5 2485.03  124.88   2
   3  -2  -5  816.69   41.87   2
  -3   2   5  810.17   41.11   3
   2  -2  -5 4217.33  203.05   2
  -2   2   5 4125.57  201.23   3
   1  -2  -5    5.94    3.56   2
  -1   2   5    3.17    2.91   3
   0   2   5 2483.03  140.44   1
   0  -2  -5 2411.28  116.86   2
   0  -2  -5 2312.68  117.14   3
  -1  -2  -5  255.06   15.15   3
   1   2   5  255.49   17.90   1
   2   2   5  243.31   18.43   1
  -2  -2  -5  247.11   15.05   3
   3   2   5  152.02   15.31   1
  -3  -2  -5  164.46   11.51   3
   4   2   5    4.33    8.11   1
  -4  -2  -5    7.42    5.16   3
  -5  -2  -5  276.75   17.98   3
   5   2   5  290.59   22.99   1
  -6  -2  -5   15.92    7.10   3
   6   2   5   12.60   10.26   1
   6  -3  -5  338.89   23.18   2
  -6   3   5  366.91   22.20   3
  -5   3   5   47.41    7.66   3
   5  -3  -5   61.51    8.95   2
   4  -3  -5  959.05   49.26   2
  -4   3   5  942.19   48.50   3
  -3   3   5  351.26   19.19   3
   3  -3  -5  322.67   19.86   2
  -2   3   5  995.40   50.12   3
   2  -3  -5 1014.56   50.57   2
   1  -3  -5  321.83   18.03   3
   1  -3  -5  341.60   18.01   2
  -1   3   5  322.65   20.23   1
   0  -3  -5  147.48   12.79   3
   0  -3  -5  163.73    9.50   2
   0   3   5  164.13   11.88   1
  -1  -3  -5   65.43    7.21   3
   1   3   5   61.04    7.46   1
  -2  -3  -5 1015.05   55.16   3
   2   3   5 1178.53   66.66   1
   3   3   5    6.13    7.07   1
  -3  -3  -5    1.80    4.71   3
   4   3   5  703.09   46.43   1
  -4  -3  -5  742.68   38.28   3
  -5  -3  -5   32.20    7.15   3
   5   3   5   23.04   10.11   1
   6  -4  -5  106.50   13.13   2
  -6   4   5  117.30   12.37   3
   5  -4  -5  365.40   23.72   2
  -5   4   5  394.87   23.25   3
  -4   4   5  565.66   30.37   3
   4  -4  -5  542.97   30.70   2
   3  -4  -5   17.15    6.17   2
  -3   4   5   16.37    5.26   3
  -2   4   5 1010.70   49.92   3
   2  -4  -5  970.31   50.03   2
   1  -4  -5   69.65    7.26   3
   1  -4  -5   77.92    6.79   2
   0   4   5  526.18   31.81   1
   0  -4  -5  478.00   28.67   3
   1   4   5   91.76    9.61   1
  -1  -4  -5  103.98    9.51   3
  -2  -4  -5  425.98   25.44   3
   2   4   5  471.66   29.96   1
  -3  -4  -5  383.26   22.01   3
   3   4   5  367.80   26.71   1
   4   4   5   46.39   10.46   1
  -4  -4  -5   53.02    8.41   3
  -5   5   5   86.55   10.77   3
   5  -5  -5  101.59   11.71   2
   4  -5  -5  647.68   35.02   2
  -4   5   5  634.66   34.67   3
   3  -5  -5   14.11    6.43   2
  -3   5   5   12.81    5.86   3
   2  -5  -5  400.93   22.59   3
   1  -5  -5   81.49    9.05   3
   0  -5  -5  133.81   12.67   3
  -1  -5  -5   26.70    7.52   3
   1   5   5   24.49    7.42   1
   2   5   5  164.30   15.61   1
  -2  -5  -5  180.42   14.54   3
  -3  -5  -5   47.24    8.35   3
   3   5   5   44.96    9.92   1
  -4  -5  -5  150.65   13.41   3
   4   5   5  142.85   15.37   1
  -5   6   5   -5.63    5.82   3
   5  -6  -5   -4.41    9.21   2
   4  -6  -5   57.22    9.07   2
  -4   6   5   48.20    8.32   3
   2  -6  -5  303.88   19.19   3
   1  -6  -5   -1.74    7.95   3
   0  -6  -5  599.00   33.93   3
  -1  -6  -5   39.55    9.01   3
   2   6   5  317.61   24.24   1
  -2  -6  -5  305.00   21.16   3
   3  -7  -5   19.33    8.66   3
   2  -7  -5   79.18   11.85   3
   1  -7  -5   85.75   14.18   3
   0  -7  -5   -0.12    9.64   3
  -1  -7  -5  145.48   15.36   3
  -1   8  -6   24.83    8.67   1
   2   7  -6  368.33   26.51   1
   1   7  -6  165.71   15.32   1
   0   7  -6  577.65   37.94   1
  -1   7  -6   29.46    8.63   1
   2  -7   6  717.65   47.84   1
  -2   7  -6  733.06   38.94   2
  -3   7  -6   -9.68    7.33   2
   3   6  -6   27.46    8.63   1
   2   6  -6  287.27   21.17   1
   1   6  -6   -4.28    5.51   1
   0   6  -6  192.33   16.09   1
  -1   6  -6    4.86    6.71   1
  -1   6  -6    8.00    5.83   2
   2  -6   6   -5.43    8.01   1
  -2   6  -6   -4.77    5.93   2
   3  -6   6   11.68   13.52   1
  -3   6  -6   28.98    7.14   2
  -4   6  -6  325.86   20.72   2
  -5   6  -6   -4.22    5.69   3
   5  -6   6   -5.86    7.31   2
   4   5  -6   40.52    9.39   1
   3   5  -6  409.07   28.32   1
   2   5  -6  592.37   37.95   1
   1   5  -6  257.82   18.64   1
   0   5  -6 1117.19   55.79   2
   0   5  -6 1106.87   67.24   1
  -1   5  -6    0.63    5.40   1
  -1   5  -6   14.68    5.06   2
  -2   5  -6  594.35   31.18   2
   2  -5   6  572.41   38.29   1
   3  -5   6   13.88   11.68   1
  -3   5  -6   13.84    5.04   3
  -3   5  -6    9.13    5.93   2
  -4   5  -6  247.28   16.69   2
  -4   5  -6  266.68   16.47   3
   4  -5   6  238.23   23.79   1
  -5   5  -6   86.64    9.82   3
   6  -5   6   45.06    8.50   2
   5   4  -6   65.33   10.69   1
   4   4  -6  753.67   47.83   1
   3   4  -6   27.15    6.76   1
   2   4  -6 1904.32  116.02   1
   2   4  -6 2012.34   96.59   2
   1   4  -6   23.89    4.40   2
   1   4  -6   11.25    4.75   1
   0   4  -6 1051.24   63.10   1
   0   4  -6 1043.04   52.36   2
  -1   4  -6  143.99    8.63   3
  -1   4  -6  133.82    9.78   2
  -1   4  -6  140.19   12.44   1
  -2   4  -6    9.84    4.79   2
   2  -4   6   10.19    8.04   1
  -2   4  -6   10.64    3.54   3
   3  -4   6   -2.69    9.31   1
  -3   4  -6    6.38    5.08   2
  -3   4  -6   -1.61    4.06   3
  -4   4  -6  595.63   31.81   2
  -4   4  -6  636.61   31.82   3
   4  -4   6  530.51   40.73   1
   5  -4   6   11.62   11.51   1
  -5   4  -6   -2.07    5.06   3
  -6   4  -6  254.43   17.52   3
   6  -4   6  265.93   18.78   2
   5   3  -6  319.02   23.21   1
   4   3  -6   38.52    7.42   1
   3   3  -6  190.33   12.92   2
   3   3  -6  168.71   14.14   1
   2   3  -6   26.23    5.41   2
   2   3  -6   45.07    6.12   1
   1   3  -6   30.89    4.90   2
   1   3  -6   36.92    5.23   1
   0   3  -6 1813.46   89.44   2
   0   3  -6 1828.94  107.30   1
  -1   3  -6  556.51   27.57   3
  -1   3  -6  558.71   28.52   2
   1  -3   6  548.42   34.81   1
  -2   3  -6  547.03   29.63   2
   2  -3   6  593.17   39.02   1
  -2   3  -6  589.28   29.11   3
  -3   3  -6    0.30    3.40   3
   3  -3   6    0.01    8.58   1
  -3   3  -6    0.34    4.15   2
  -4   3  -6 1065.50   53.77   2
  -4   3  -6 1058.70   53.68   3
   4  -3   6 1059.36   66.25   1
  -5   3  -6  523.48   30.12   3
   5  -3   6  597.11   39.46   1
   6  -3   6  256.16   17.95   2
   6  -3   6  247.92   23.99   1
  -6   3  -6  243.15   16.50   3
   5   2  -6  272.66   19.95   1
   4   2  -6 2435.24  120.03   2
   4   2  -6 2434.72  143.49   1
   3   2  -6  196.93   13.44   2
   3   2  -6  197.08   14.52   1
   2   2  -6 2867.58  164.13   1
   2   2  -6 2853.70  138.01   2
  -2  -2   6 2703.61  134.89   3
   1   2  -6  424.32   24.28   1
   1   2  -6  344.94   20.83   2
   0   2  -6 1614.66   95.17   1
   0   2  -6 1622.98   79.53   2
  -1   2  -6   87.57    6.69   2
  -1   2  -6   75.59    5.47   3
   1  -2   6   79.52    8.37   1
  -2   2  -6  166.11   10.51   3
   2  -2   6  183.18   16.39   1
  -2   2  -6  177.33   10.73   2
  -3   2  -6  131.46    9.38   3
   3  -2   6  113.34   13.76   1
  -3   2  -6  133.37    9.37   2
  -4   2  -6  479.93   26.68   3
  -4   2  -6  505.73   26.49   2
   4  -2   6  507.57   34.99   1
   5  -2   6  192.73   14.33   2
   5  -2   6  229.09   21.34   1
  -5   2  -6  198.61   13.90   3
   6  -2   6   34.93    8.47   2
   6  -2   6   39.29   12.60   1
  -6   2  -6   54.75    7.71   3
   5   1  -6   19.86    6.01   2
   4   1  -6  567.42   34.04   1
   4   1  -6  541.24   29.13   2
  -4  -1   6  532.25   28.07   3
  -3  -1   6    7.97    2.76   3
   3   1  -6    3.60    3.43   1
   3   1  -6   11.27    4.33   2
  -2  -1   6    7.06    2.14   3
   2   1  -6   13.40    3.20   1
   2   1  -6    7.36    3.86   2
   1   1  -6 1677.40   79.94   3
   1   1  -6 1666.79   97.17   1
   1   1  -6 1632.20   82.16   2
   0   1  -6  300.40   18.79   2
   0  -1   6  375.35   22.66   1
   0   1  -6  381.20   17.77   3
  -1   1  -6   33.61    3.84   2
   1  -1   6   40.40    6.50   1
  -1   1  -6   38.70    3.70   3
  -2   1  -6 2677.80  120.37   3
   2  -1   6 2181.06  146.12   1
  -2   1  -6 2575.04  121.00   2
  -3   1  -6  305.47   17.82   2
   3  -1   6  354.94   25.26   1
  -3   1  -6  344.12   18.37   3
  -4   1  -6 1121.50   57.71   2
  -4   1  -6 1153.78   58.03   3
   4  -1   6 1201.83   71.72   1
  -5   1  -6  933.37   48.73   3
   5  -1   6  968.22   60.38   1
   6  -1   6  172.37   18.41   1
  -6   1  -6  170.91   13.04   3
   6   0  -6  534.64   30.95   2
  -6   0   6  558.25   29.91   3
   5   0  -6  374.26   21.76   2
  -5   0   6  352.15   20.46   3
   4   0  -6 1844.90   90.65   2
  -4   0   6 1801.25   89.23   3
  -3   0   6   52.11    5.16   3
   3   0  -6   61.17    5.39   1
   3   0  -6   62.69    6.66   2
   2   0  -6 2532.34  126.24   2
  -2   0   6 2660.12  124.80   3
   2   0  -6 2561.48  150.39   1
   1   0  -6  167.40   10.06   2
  -1   0   6  157.80   11.44   1
   0   0  -6  853.71   44.78   2
   0   0  -6  938.82   44.37   3
   0   0   6  910.15   53.90   1
   1   0   6  207.39   18.04   1
  -1   0  -6  253.93   13.12   2
  -1   0  -6  254.62   13.73   3
  -2   0  -6  128.35    8.43   2
   2   0   6  147.38   14.55   1
  -2   0  -6  150.97    9.60   3
  -3   0  -6 1230.44   62.81   2
  -3   0  -6 1332.36   63.30   3
   3   0   6 1264.45   77.55   1
   4   0   6   26.70    9.88   1
  -4   0  -6   45.28    6.09   3
   5   0   6  771.37   50.39   1
  -5   0  -6  771.93   40.49   3
  -6   0  -6   18.77    6.47   3
   6   0   6   17.92   10.87   1
   7  -1  -6   -6.81    7.01   2
  -7   1   6    0.34    5.72   3
   6  -1  -6  594.33   34.86   2
  -6   1   6  648.20   33.83   3
   5  -1  -6   35.80    7.87   2
  -5   1   6   20.69    5.61   3
   4  -1  -6 1520.47   75.46   2
  -4   1   6 1483.78   74.14   3
   3  -1  -6  779.75   40.54   2
  -3   1   6  794.21   39.65   3
  -2   1   6    3.69    2.81   3
   2  -1  -6    7.55    4.17   2
  -1   1   6   11.64    3.37   1
   1  -1  -6   13.27    3.46   2
   0  -1  -6 2333.87  125.27   2
   0  -1  -6 2603.94  124.66   3
   0   1   6 2767.03  150.19   1
  -1  -1  -6    7.38    2.49   2
   1   1   6    8.21    5.49   1
  -1  -1  -6   11.06    3.92   3
  -2  -1  -6 2918.13  141.27   2
  -2  -1  -6 2786.66  141.14   3
   2   1   6 3028.73  171.15   1
   3   1   6   53.39   10.04   1
  -3  -1  -6   59.50    6.46   3
  -4  -1  -6  483.49   25.74   3
   4   1   6  442.81   32.55   1
  -5  -1  -6  123.60   10.82   3
   5   1   6  118.52   14.47   1
   6   1   6   27.61   12.39   1
  -6   2   6  214.40   15.27   3
   6  -2  -6  218.52   17.11   2
   5  -2  -6   -9.16    6.75   2
  -5   2   6   -8.42    4.61   3
   4  -2  -6  792.73   42.22   2
  -4   2   6  817.07   41.43   3
  -3   2   6  459.81   24.44   3
   3  -2  -6  455.26   25.42   2
  -2   2   6  473.76   25.39   3
   2  -2  -6  506.48   26.17   2
   1  -2  -6   65.97    5.56   3
   1  -2  -6   66.14    5.79   2
   0  -2  -6 1497.46   79.87   3
   0   2   6 1692.88   95.33   1
   0  -2  -6 1661.18   79.37   2
  -1  -2  -6 1809.89   88.36   3
   1   2   6 1794.53  106.46   1
  -2  -2  -6  377.01   23.77   3
   2   2   6  504.76   29.53   1
  -3  -2  -6 1553.56   76.88   3
   3   2   6 1549.75   93.38   1
   4   2   6  108.24   13.75   1
  -4  -2  -6  119.89   10.37   3
  -5  -2  -6  915.86   47.48   3
   5   2   6  902.43   58.23   1
   6  -3  -6  805.34   45.90   2
  -6   3   6  893.15   45.72   3
  -5   3   6   48.28    7.70   3
   5  -3  -6   57.30    9.09   2
  -4   3   6  528.69   27.70   3
   4  -3  -6  476.84   28.21   2
  -3   3   6  201.61   13.39   3
   3  -3  -6  226.13   14.47   2
  -2   3   6   65.92    6.50   3
   2  -3  -6   61.07    6.93   2
   1  -3  -6   37.97    5.42   2
   1  -3  -6   43.70    5.30   3
   0   3   6  936.22   55.73   1
   0  -3  -6  926.03   47.99   3
  -1  -3  -6  455.37   24.55   3
   1   3   6  429.03   28.45   1
  -2  -3  -6  262.22   17.37   3
   2   3   6  295.49   20.91   1
  -3  -3  -6   34.85    6.68   3
   3   3   6   44.91    9.43   1
   4   3   6   -0.06    8.32   1
  -4  -3  -6   10.04    6.39   3
  -5  -3  -6    5.60    6.79   3
   5   3   6   -4.74    9.06   1
   6  -4  -6   -7.97    8.62   2
  -6   4   6   -0.10    8.23   3
   5  -4  -6   69.28   10.09   2
  -5   4   6   75.37    9.55   3
   4  -4  -6  116.76   10.98   2
  -4   4   6  127.84   10.86   3
  -3   4   6   74.76    7.89   3
   3  -4  -6   75.52    8.40   2
   2  -4  -6  811.96   39.90   2
  -2   4   6  730.95   39.64   3
   1  -4  -6  112.39    9.89   3
   0  -4  -6  761.89   41.59   3
   0   4   6  801.64   47.78   1
   1   4   6  886.61   57.83   1
  -1  -4  -6 1028.98   49.16   3
  -2  -4  -6  491.58   27.63   3
   2   4   6  487.15   32.52   1
  -3  -4  -6  724.57   42.59   3
   3   4   6  919.88   52.37   1
  -4  -4  -6    5.37    7.29   3
   4   4   6    4.64    8.71   1
   5  -5  -6    5.95    8.37   2
  -5   5   6    5.64    7.67   3
  -4   5   6  170.69   13.38   3
   4  -5  -6  162.28   13.79   2
  -3   5   6   20.64    6.45   3
   3  -5  -6   25.26    6.74   2
   2  -5  -6   42.17    6.74   3
   1  -5  -6  381.76   22.90   3
   0  -5  -6   31.29    8.62   3
   1   5   6  403.90   28.79   1
  -1  -5  -6  450.97   25.12   3
   2   5   6   16.78    7.81   1
  -2  -5  -6    4.51    7.54   3
   3   5   6  261.59   20.11   1
  -3  -5  -6  191.69   16.26   3
  -4   6   6  121.64   11.82   3
   3  -6  -6   30.08    7.68   3
   2  -6  -6  459.40   26.70   3
   1  -6  -6   13.57    9.23   3
   0  -6  -6  381.62   24.04   3
  -1  -6  -6  181.66   15.62   3
  -2  -6  -6   50.43   10.69   3
   3  -7  -6  122.71   13.16   3
   2  -7  -6   27.66   10.69   3
   1  -7  -6  400.11   27.60   3
   0  -7  -6   35.70   11.13   3
   2   7  -7  364.87   26.38   1
   1   7  -7   12.23    7.41   1
   0   7  -7  316.10   23.56   1
  -1   7  -7    0.13    7.38   1
  -2   7  -7  364.79   22.74   2
   2  -7   7  389.21   28.88   1
  -3   7  -7  172.86   14.42   2
   3  -7   7  149.31   21.50   1
  -4   7  -7   71.60    9.60   2
   3   6  -7   14.62    7.87   1
   2   6  -7  418.86   28.72   1
   1   6  -7   80.37   10.06   1
   0   6  -7   61.55    9.17   1
  -1   6  -7   74.96   10.13   1
  -1   6  -7   91.96    8.65   2
   2  -6   7  117.46   14.11   1
  -2   6  -7  140.39   11.53   2
  -3   6  -7   50.27    8.21   2
   3  -6   7   46.44   15.18   1
  -4   6  -7  164.81   13.46   2
   4  -6   7  149.65   18.44   1
   4   5  -7   13.41    8.15   1
   3   5  -7    5.40    6.34   1
   2   5  -7  312.69   22.08   1
   1   5  -7   14.32    5.06   2
   1   5  -7    3.30    5.38   1
   0   5  -7  632.63   32.85   2
   0   5  -7  622.46   39.78   1
  -1   5  -7    4.39    5.07   2
  -1   5  -7    2.42    5.67   1
   2  -5   7  920.30   57.60   1
  -2   5  -7  918.03   47.16   2
   3  -5   7  632.17   42.32   1
  -3   5  -7  578.59   32.35   2
  -4   5  -7  591.08   30.51   3
  -4   5  -7  519.28   30.41   2
   4  -5   7  547.73   39.39   1
  -5   5  -7  681.54   37.34   2
  -5   5  -7  778.45   37.92   3
   5  -5   7  583.09   46.75   1
   5   4  -7   52.56   10.17   1
   4   4  -7  968.34   60.20   1
   3   4  -7   31.40    6.97   1
   2   4  -7 1096.55   67.52   1
   2   4  -7 1140.08   56.46   2
   1   4  -7  123.23    9.96   2
   1   4  -7  135.74   11.34   1
   0   4  -7   34.69    5.29   2
   0   4  -7   43.38    6.64   1
  -1   4  -7  315.03   17.70   2
  -1   4  -7  304.79   21.27   1
  -2   4  -7   87.40    7.01   3
   2  -4   7   77.61   11.90   1
  -2   4  -7   88.92    7.77   2
   3  -4   7  492.57   34.26   1
  -3   4  -7  487.38   25.70   3
  -3   4  -7  458.39   26.04   2
  -4   4  -7   27.28    6.04   2
   4  -4   7   26.78   12.35   1
  -4   4  -7   27.37    5.87   3
  -5   4  -7  589.25   31.38   2
   5  -4   7  531.43   40.67   1
  -5   4  -7  579.79   31.62   3
  -6   4  -7   40.78    7.62   3
   6  -4   7   43.90    9.13   2
   5   3  -7   23.41    7.29   1
   4   3  -7   -2.99    5.12   1
   3   3  -7  198.19   13.44   2
   3   3  -7  176.51   14.38   1
   2   3  -7  126.30   10.94   1
   2   3  -7  126.86   10.32   2
   1   3  -7  263.07   17.93   1
   1   3  -7  262.18   15.65   2
   0   3  -7 3072.89  153.42   2
   0   3  -7 3218.01  184.03   1
  -1   3  -7  209.85   11.03   3
  -1   3  -7  197.10   12.23   2
   1  -3   7  192.77   16.17   1
  -2   3  -7 1665.52   79.07   3
   2  -3   7 1626.17   97.87   1
  -2   3  -7 1564.17   79.94   2
  -3   3  -7 1317.14   64.95   2
  -3   3  -7 1258.66   64.33   3
   3  -3   7 1322.09   79.39   1
   4  -3   7  490.80   38.76   1
  -4   3  -7  581.47   30.30   3
  -4   3  -7  603.21   30.28   2
   5  -3   7  652.66   41.67   1
  -5   3  -7  551.04   30.97   2
  -5   3  -7  550.62   31.34   3
   6  -3   7    6.68   13.05   1
  -6   3  -7   -2.36    5.21   3
   6  -3   7    0.68    7.42   2
   5   2  -7    3.22    5.76   2
   5   2  -7    7.08    5.17   1
   4   2  -7  939.12   57.18   1
   4   2  -7  947.38   48.66   2
   3   2  -7    9.80    5.59   2
   3   2  -7    3.04    4.03   1
   2   2  -7  449.33   25.19   2
   2   2  -7  447.94   28.04   1
   1   2  -7  157.63   11.93   1
   1   2  -7  149.95   10.77   2
   0   2  -7  174.01   11.10   2
   0   2  -7  177.60   12.92   1
   1  -2   7 1963.44  121.46   1
  -1   2  -7 2058.84  100.69   2
  -1   2  -7 2133.83   99.41   3
  -2   2  -7   78.31    6.68   3
   2  -2   7   82.06   10.22   1
  -2   2  -7   79.72    6.39   2
  -3   2  -7 3156.84  148.36   3
   3  -2   7 2859.41  180.14   1
  -3   2  -7 3131.50  149.18   2
  -4   2  -7  205.41   13.59   3
   4  -2   7  216.43   21.72   1
  -4   2  -7  204.66   13.10   2
   5  -2   7  649.57   46.28   1
  -5   2  -7  705.40   36.45   3
   6  -2   7  123.90   17.58   1
  -6   2  -7  128.83   11.38   3
   6   1  -7  388.00   23.24   2
   5   1  -7  199.77   14.16   2
   4   1  -7  250.01   17.09   1
   4   1  -7  250.35   15.61   2
   3   1  -7  180.60   12.36   1
  -3  -1   7  169.82    9.93   3
   3   1  -7  157.24   11.34   2
   2   1  -7  911.33   54.00   1
   2   1  -7  918.86   46.03   2
  -2  -1   7  899.70   44.34   3
   1   1  -7    3.82    2.83   1
   1   1  -7    1.33    1.95   3
   1   1  -7   -1.80    4.32   2
   0  -1   7 1307.81   75.59   1
   0   1  -7 1177.52   63.00   2
   0   1  -7 1330.23   61.79   3
  -1   1  -7   48.94    4.63   2
   1  -1   7   45.82    7.23   1
  -1   1  -7   44.95    4.19   3
   2  -1   7  945.84   58.67   1
  -2   1  -7  960.20   47.30   3
  -2   1  -7  943.83   47.34   2
  -3   1  -7   38.00    4.66   2
   3  -1   7   46.57   10.90   1
  -3   1  -7   30.01    5.18   3
  -4   1  -7   -1.70    3.87   2
  -4   1  -7   -2.47    4.33   3
   4  -1   7   -7.44   10.02   1
   5  -1   7  259.09   24.45   1
  -5   1  -7  275.52   17.07   3
  -6   1  -7   49.42    7.73   3
   6  -1   7   60.59   14.45   1
   6   0  -7  191.58   15.09   2
  -5   0   7  103.50    9.00   3
   5   0  -7   99.94   10.02   2
  -4   0   7  474.92   25.31   3
   4   0  -7  494.25   26.82   2
  -3   0   7  340.26   17.67   3
   3   0  -7  328.10   18.76   2
   3   0  -7  319.23   20.32   1
   2   0  -7 1291.23   75.12   1
   2   0  -7 1231.03   63.50   2
  -2   0   7 1323.48   62.53   3
   1   0  -7 2215.60  106.86   2
  -1   0   7 2174.43  127.57   1
   1   0  -7 2152.18  105.23   3
   0   0   7 3411.61  198.00   1
   0   0  -7 3334.73  165.13   2
   0   0  -7 3433.55  163.66   3
   1   0   7 2757.67  168.23   1
  -1   0  -7 2978.24  138.93   3
  -2   0  -7  953.03   45.41   3
  -2   0  -7  892.40   44.86   2
   2   0   7  863.00   56.18   1
   3   0   7 3098.04  187.77   1
  -3   0  -7 3349.75  154.83   3
  -3   0  -7 3100.21  154.90   2
  -4   0  -7  182.92   13.06   3
   4   0   7  188.21   18.06   1
  -5   0  -7  730.17   38.10   3
   5   0   7  696.52   47.75   1
  -6   0  -7   19.64    7.12   3
   6   0   7   14.28   12.45   1
   6  -1  -7  387.45   24.31   2
  -6   1   7  384.79   22.61   3
   5  -1  -7   84.26    9.89   2
  -5   1   7   82.97    8.21   3
  -4   1   7   66.94    6.75   3
   4  -1  -7   67.08    8.40   2
   3  -1  -7  158.84   11.34   2
  -3   1   7  121.75    9.54   3
  -2   1   7 1032.25   51.25   3
   2  -1  -7 1047.18   52.08   2
   1  -1  -7 1359.43   64.86   3
  -1   1   7 1297.85   78.09   1
   1  -1  -7 1330.39   65.49   2
   0  -1  -7  331.03   17.90   3
   0   1   7  321.71   22.09   1
   0  -1  -7  315.40   17.76   2
  -1  -1  -7 1249.85   62.13   3
  -1  -1  -7 1220.87   61.72   2
   1   1   7 1300.69   75.46   1
  -2  -1  -7   18.95    2.87   2
  -2  -1  -7    6.78    4.25   3
   2   1   7    5.03    7.64   1
  -3  -1  -7  139.88   11.19   3
   3   1   7  154.23   14.89   1
  -4  -1  -7  205.74   14.36   3
   4   1   7  199.20   20.16   1
   5   1   7   25.77   11.00   1
  -5  -1  -7   15.93    6.43   3
  -6  -1  -7   48.02    8.93   3
   6   1   7   41.37   14.05   1
  -6   2   7   52.03    8.36   3
   6  -2  -7   52.64    9.90   2
   5  -2  -7  236.12   17.01   2
  -5   2   7  228.44   15.37   3
   4  -2  -7  599.24   32.33   2
  -4   2   7  582.87   31.31   3
   3  -2  -7  139.72   11.54   2
  -3   2   7  130.09    9.99   3
   2  -2  -7 1775.35   86.88   2
  -2   2   7 1742.18   86.00   3
   1  -2  -7 1210.02   58.61   2
   1  -2  -7 1154.69   58.28   3
   0  -2  -7 1611.59   86.16   2
   0   2   7 1840.95  103.27   1
   0  -2  -7 1813.55   86.50   3
  -1  -2  -7 5005.09  240.94   3
   1   2   7 4972.24  291.02   1
   2   2   7   38.11    8.49   1
  -2  -2  -7   33.07    6.25   3
   3   2   7 1132.08   66.01   1
  -3  -2  -7 1001.79   53.76   3
   4   2   7   -0.47    9.37   1
  -4  -2  -7   12.29    6.23   3
   5   2   7  308.89   26.61   1
  -5  -2  -7  346.78   20.80   3
   6  -3  -7  209.57   17.33   2
  -6   3   7  215.72   16.52   3
  -5   3   7   15.09    6.72   3
   5  -3  -7   17.70    7.90   2
  -4   3   7    6.29    5.61   3
   4  -3  -7   13.23    6.80   2
   3  -3  -7  873.70   44.58   2
  -3   3   7  847.66   43.92   3
  -2   3   7    5.88    4.53   3
   2  -3  -7    7.38    5.54   2
   1  -3  -7  754.00   42.75   3
   1  -3  -7  931.91   42.67   2
   0   3   7  153.37   12.28   1
   0  -3  -7  137.70   11.61   3
   1   3   7 2067.03  122.04   1
  -1  -3  -7 2061.09  101.51   3
  -2  -3  -7  349.45   21.23   3
   2   3   7  364.48   25.54   1
  -3  -3  -7   92.80    9.73   3
   3   3   7  121.43   13.34   1
  -4  -3  -7  144.54   13.02   3
   4   3   7  168.37   16.88   1
  -5  -3  -7   26.10    8.49   3
   5   3   7   13.53    9.89   1
   6  -4  -7   62.49   11.63   2
  -6   4   7   66.33   11.22   3
  -5   4   7   42.05    8.23   3
   5  -4  -7   34.04    9.02   2
  -4   4   7  382.40   22.70   3
   4  -4  -7  387.94   22.90   2
   3  -4  -7   -3.52    5.97   2
  -3   4   7   -4.76    5.09   3
   2  -4  -7  701.15   36.79   3
   2  -4  -7  715.11   37.02   2
   1  -4  -7  384.92   22.18   3
   0  -4  -7   79.81    9.52   3
  -1  -4  -7  414.57   23.57   3
   1   4   7  396.13   27.15   1
   2   4   7   -4.77    6.91   1
  -2  -4  -7   -7.50    6.33   3
   3   4   7  307.35   22.76   1
  -3  -4  -7  250.95   18.09   3
   4   4   7    6.31    9.35   1
  -4  -4  -7   12.04    7.72   3
  -5   5   7   91.90   11.49   3
   5  -5  -7   83.35   11.47   2
   4  -5  -7  150.00   13.32   2
  -4   5   7  153.23   12.89   3
   3  -5  -7  527.32   28.76   2
  -3   5   7  507.48   28.72   3
   2  -5  -7  137.28   11.52   3
   1  -5  -7 1715.17   86.33   3
   0  -5  -7   87.29   10.50   3
  -1  -5  -7  764.00   40.81   3
  -2  -5  -7  129.33   12.33   3
   2   5   7   96.73   12.29   1
  -3  -5  -7  100.36   11.45   3
   3   5   7   98.29   13.16   1
  -4   6   7   68.88    9.92   3
   3  -6  -7   85.32    9.76   3
   2  -6  -7    4.27    7.56   3
   1  -6  -7   -8.53    9.11   3
   0  -6  -7   29.52    9.51   3
  -1  -6  -7   48.64   10.08   3
  -2  -6  -7   31.81   10.38   3
   2  -7  -7   24.37   11.61   3
   1  -7  -7  470.40   30.50   3
   2   7  -8  242.31   19.76   1
   1   7  -8   -1.27    7.19   1
   0   7  -8  262.21   20.86   1
  -1   7  -8  117.47   12.96   1
  -2   7  -8  281.70   18.78   2
   2  -7   8  279.22   24.95   1
   3  -7   8  514.76   41.68   1
  -3   7  -8  509.17   29.22   2
   3   6  -8   92.48   11.91   1
   2   6  -8  142.90   14.06   1
   1   6  -8  230.18   18.48   1
   0   6  -8   27.99    7.92   1
   0   6  -8   34.74    6.30   2
  -1   6  -8  528.43   29.00   2
  -1   6  -8  530.14   34.94   1
  -2   6  -8    6.52    6.21   2
   2  -6   8   -0.92    9.27   1
  -3   6  -8  524.70   30.96   2
   3  -6   8  614.88   42.16   1
  -4   6  -8  113.65   11.41   2
   4  -6   8  158.03   18.62   1
  -5   6  -8  114.39   10.80   2
   4   5  -8    8.57    7.82   1
   3   5  -8  251.02   19.51   1
   2   5  -8  307.63   21.91   1
   1   5  -8    2.39    5.56   1
   1   5  -8    7.55    5.49   2
   0   5  -8  555.82   29.20   2
   0   5  -8  536.71   35.27   1
  -1   5  -8  107.47    8.89   2
  -1   5  -8  103.18   10.77   1
  -2   5  -8  398.89   23.16   2
   2  -5   8  430.56   29.97   1
   3  -5   8  550.06   37.96   1
  -3   5  -8  499.76   28.63   2
   4  -5   8    0.53   12.00   1
  -4   5  -8    1.61    5.92   2
   5  -5   8  141.97   20.65   1
  -5   5  -8  170.07   14.21   2
  -5   5  -8  208.03   14.72   3
   5   4  -8    4.51    7.30   1
   4   4  -8  431.09   29.54   1
   3   4  -8   92.54   10.02   1
   2   4  -8  375.32   21.15   2
   2   4  -8  352.76   24.21   1
   1   4  -8 1201.15   72.96   1
   1   4  -8 1224.66   61.07   2
   0   4  -8   88.51    7.97   2
   0   4  -8   98.71    9.66   1
   1  -4   8 2945.66  177.85   1
  -1   4  -8 3106.53  148.20   2
  -2   4  -8  416.44   23.25   2
   2  -4   8  438.12   31.37   1
  -3   4  -8 2006.00   94.98   3
   3  -4   8 1962.59  116.13   1
  -3   4  -8 1827.15   95.77   2
   4  -4   8  161.76   18.07   1
  -4   4  -8  136.06   11.62   2
  -4   4  -8  148.18   11.46   3
  -5   4  -8  306.77   18.39   3
  -5   4  -8  267.40   17.77   2
   5  -4   8  239.58   26.35   1
   6  -4   8  111.29   11.89   2
  -6   4  -8  108.51   11.11   3
   6  -4   8  160.02   21.29   1
   5   3  -8  260.24   19.86   1
   4   3  -8   59.83    8.05   1
   3   3  -8  195.84   15.26   1
   3   3  -8  208.43   14.49   2
   2   3  -8  274.03   15.43   2
   2   3  -8  215.05   16.68   1
   1   3  -8  237.30   15.78   1
   1   3  -8  175.29   13.23   2
   0   3  -8  468.79   29.10   1
   0   3  -8  438.25   24.31   2
  -1   3  -8   -1.33    3.81   2
   1  -3   8   -0.46    6.37   1
   2  -3   8  158.03   15.37   1
  -2   3  -8  158.05   10.89   2
  -2   3  -8  157.26    9.76   3
  -3   3  -8   84.42    7.49   2
  -3   3  -8   71.98    6.97   3
   3  -3   8   83.98   12.21   1
  -4   3  -8  194.28   13.01   2
  -4   3  -8  172.80   12.81   3
   4  -3   8  181.68   18.94   1
  -5   3  -8   79.70    8.42   2
  -5   3  -8   88.47    9.12   3
   5  -3   8   81.79   16.29   1
   6  -3   8   94.88   11.54   2
   6  -3   8  135.18   19.47   1
  -6   3  -8  120.22   11.09   3
   5   2  -8   42.76    8.24   2
   4   2  -8  379.97   25.88   1
   4   2  -8  418.62   23.47   2
   3   2  -8  342.08   22.05   2
   3   2  -8  381.47   23.81   1
   2   2  -8 1548.57   96.12   1
   2   2  -8 1720.30   81.49   2
   1   2  -8 4408.46  258.66   1
   1   2  -8 4472.16  216.34   2
   0   2  -8 1122.17   57.48   2
   0  -2   8 1177.70   68.71   1
  -1   2  -8 4413.65  210.46   2
  -1   2  -8 4501.29  208.24   3
   1  -2   8 4046.13  253.00   1
   2  -2   8  551.00   35.40   1
  -2   2  -8  533.85   27.91   2
  -2   2  -8  521.64   27.54   3
  -3   2  -8 2081.39   99.74   3
  -3   2  -8 2027.24  100.05   2
   3  -2   8 1984.05  121.71   1
  -4   2  -8  137.82   10.96   3
  -4   2  -8  140.18   10.62   2
   4  -2   8  119.38   16.76   1
  -5   2  -8   66.21    8.46   3
  -5   2  -8   64.40    7.34   2
   5  -2   8   78.63   15.70   1
   6  -2   8   53.98   15.95   1
  -6   2  -8   64.47    8.71   3
   6   1  -8   97.96   10.14   2
   5   1  -8  173.18   13.00   2
   4   1  -8   31.45    6.03   2
   3   1  -8  465.54   26.89   1
   3   1  -8  388.50   23.53   2
   2   1  -8  106.68    8.65   2
   2   1  -8  113.18    9.10   1
  -2  -1   8   94.14    6.47   3
   1   1  -8 2368.94  114.86   2
   1   1  -8 2209.90  136.48   1
   1   1  -8 2431.45  112.67   3
   0   1  -8  229.59   12.66   2
   0  -1   8  211.26   16.83   1
   0   1  -8  178.20   11.04   3
  -1   1  -8  756.01   38.86   2
   1  -1   8  786.54   47.56   1
  -1   1  -8  768.56   38.36   3
  -2   1  -8  692.30   34.32   3
   2  -1   8  658.02   43.40   1
  -2   1  -8  662.49   34.19   2
   3  -1   8   62.27   12.35   1
  -3   1  -8   69.45    6.13   2
  -3   1  -8   68.74    7.06   3
  -4   1  -8  446.60   23.87   2
   4  -1   8  441.96   33.52   1
  -4   1  -8  436.66   24.65   3
   5  -1   8  116.53   16.71   1
  -5   1  -8   93.85    9.77   3
   6  -1   8   19.85   14.41   1
  -6   1  -8    2.06    5.62   3
   6   0  -8  113.92   11.43   2
   5   0  -8   22.18    6.84   2
  -4   0   8 1147.05   57.30   3
   4   0  -8 1165.03   58.78   2
   3   0  -8  284.40   18.33   2
  -3   0   8  344.68   17.37   3
   2   0  -8 1127.10   67.20   1
  -2   0   8 1159.41   55.97   3
   2   0  -8 1146.71   57.08   2
  -1   0   8 3587.02  203.27   1
   1   0  -8 3361.17  170.05   2
   1   0  -8 3495.93  167.85   3
   0   0  -8  544.18   29.06   2
   0   0  -8  565.67   28.55   3
   0   0   8  577.32   35.37   1
   1   0   8 1968.62  110.72   1
  -1   0  -8 1577.96   90.74   3
  -1   0  -8 2053.19   91.55   2
   2   0   8  146.93   15.73   1
  -2   0  -8  186.48   10.60   2
  -2   0  -8  164.92   11.48   3
   3   0   8  685.62   47.99   1
  -3   0  -8  728.28   37.19   2
  -3   0  -8  791.18   38.56   3
   4   0   8   19.22   11.35   1
  -4   0  -8   14.94    5.66   3
   5   0   8   54.03   13.82   1
  -5   0  -8   45.84    7.84   3
   6   0   8  103.81   17.66   1
  -6   0  -8   80.62   10.00   3
   6  -1  -8   11.76    8.17   2
  -5   1   8  448.58   24.93   3
   5  -1  -8  453.47   26.73   2
   4  -1  -8   45.81    7.78   2
  -4   1   8   42.90    5.91   3
  -3   1   8 2316.55  112.22   3
   3  -1  -8 2292.41  113.71   2
   2  -1  -8   55.20    6.22   2
  -2   1   8   52.46    5.25   3
   1  -1  -8 4661.95  223.88   3
   1  -1  -8 4628.75  225.81   2
   0   1   8 1847.13  115.10   1
   0  -1  -8 2008.86   95.15   3
   0  -1  -8 1989.57   95.59   2
  -1  -1  -8 1797.49   97.27   2
   1   1   8 2046.57  118.25   1
  -1  -1  -8 2143.28   97.43   3
   2   1   8  572.54   37.55   1
  -2  -1  -8  559.96   28.47   2
   3   1   8   -1.30    8.90   1
  -3  -1  -8    1.33    4.80   3
   4   1   8  247.15   22.28   1
  -4  -1  -8  222.45   15.79   3
   5   1   8  195.67   20.12   1
  -5  -1  -8  191.12   14.45   3
   6  -2  -8  189.05   16.29   2
  -6   2   8  176.46   14.25   3
  -5   2   8   50.67    7.44   3
   5  -2  -8   53.32    9.06   2
   4  -2  -8  302.91   19.30   2
  -4   2   8  297.13   17.91   3
   3  -2  -8  277.84   17.29   2
  -3   2   8  271.64   16.15   3
   2  -2  -8   38.37    6.24   2
  -2   2   8   45.53    5.65   3
   1  -2  -8  319.42   17.73   3
   1  -2  -8  312.11   17.48   2
   0  -2  -8  496.84   26.23   2
   0  -2  -8  500.62   26.80   3
   0   2   8  490.06   31.44   1
   1   2   8  406.34   27.08   1
  -1  -2  -8  386.80   22.11   3
  -2  -2  -8  250.51   16.61   3
   2   2   8  282.62   21.78   1
   3   2   8  136.96   14.00   1
  -3  -2  -8   86.59    9.23   3
   4   2   8   44.09   12.14   1
  -4  -2  -8   43.73    8.02   3
  -5  -2  -8  189.31   14.89   3
   5   2   8  187.46   20.03   1
   6  -3  -8  216.45   18.52   2
  -6   3   8  225.15   17.08   3
  -5   3   8  454.12   26.68   3
   5  -3  -8  479.56   27.88   2
  -4   3   8  183.84   12.86   3
   4  -3  -8  158.44   13.88   2
   3  -3  -8 2530.99  123.04   2
  -3   3   8 2451.70  121.86   3
   2  -3  -8  752.05   39.18   3
   2  -3  -8  779.26   39.61   2
   1  -3  -8 2484.81  119.17   2
   1  -3  -8 2380.85  119.04   3
   0   3   8  365.01   23.87   1
   0  -3  -8  361.86   21.61   3
  -1  -3  -8  481.58   26.01   3
   1   3   8  455.02   30.73   1
   2   3   8  358.91   25.59   1
  -2  -3  -8  333.08   20.73   3
   3   3   8   27.81   10.48   1
  -3  -3  -8   11.08    6.62   3
   4   3   8  201.25   19.52   1
  -4  -3  -8  185.88   14.99   3
   5   3   8   16.40    9.28   1
  -5  -3  -8    8.61    7.65   3
   6  -4  -8   64.69   11.62   2
  -6   4   8   58.02   10.94   3
   5  -4  -8  214.71   16.69   2
  -5   4   8  199.18   15.99   3
   4  -4  -8   -0.30    6.91   2
  -4   4   8   -7.38    5.82   3
  -3   4   8  138.52   12.10   3
   3  -4  -8  169.74   13.01   2
   2  -4  -8  127.33   10.73   3
   2  -4  -8  150.13   11.90   2
   1  -4  -8    8.33    6.31   3
   0  -4  -8  401.07   23.75   3
   1   4   8  127.83   13.45   1
  -1  -4  -8  138.66   11.49   3
  -2  -4  -8   62.27    9.27   3
   2   4   8   78.32   11.04   1
  -3  -4  -8  181.13   14.94   3
   3   4   8  209.54   19.25   1
  -4  -4  -8    6.05    8.79   3
   4   4   8    1.05    9.87   1
  -5   5   8  505.30   29.42   3
   5  -5  -8  467.02   29.08   2
   4  -5  -8   47.75    8.82   2
  -4   5   8   57.40    9.30   3
   3  -5  -8  824.24   43.20   3
   2  -5  -8   -0.87    6.36   3
   1  -5  -8  572.70   33.19   3
   0  -5  -8   72.81   10.12   3
  -1  -5  -8  162.01   14.06   3
   2   5   8  162.00   16.29   1
  -2  -5  -8  177.59   14.84   3
  -3  -5  -8    5.00    8.58   3
   3   5   8   -3.91    8.84   1
   4  -6  -8  111.76   11.01   3
   3  -6  -8  250.11   17.86   3
   2  -6  -8  201.14   16.81   3
   1  -6  -8   -0.46    9.31   3
   0  -6  -8  309.88   21.21   3
  -1  -6  -8   33.34   10.16   3
   2   7  -9  107.24   12.22   1
   1   7  -9   -3.45    7.13   1
   0   7  -9   20.23    8.33   1
  -2   7  -9   -0.16    6.83   2
   2  -7   9   -8.19   11.46   1
  -3   7  -9   99.65   10.79   2
   3  -7   9  112.83   20.71   1
   3   6  -9  295.28   23.40   1
   2   6  -9   87.51   11.28   1
   1   6  -9  810.30   51.23   1
   0   6  -9  182.71   13.76   2
   0   6  -9  180.10   16.32   1
  -1   6  -9 1362.38   68.86   2
  -2   6  -9  132.16   11.31   2
   2  -6   9  140.98   16.06   1
  -3   6  -9  289.41   19.26   2
   3  -6   9  319.07   28.90   1
   4  -6   9  208.29   21.15   1
  -4   6  -9  160.50   14.00   2
   4   5  -9   21.74    8.01   1
   3   5  -9  362.68   25.61   1
   2   5  -9   41.97    7.66   1
   1   5  -9   44.79    7.33   2
   1   5  -9   46.60    8.11   1
   0   5  -9   29.37    6.27   2
   0   5  -9   33.79    7.43   1
  -1   5  -9   10.09    5.67   2
   1  -5   9   14.22    8.07   1
   2  -5   9  214.73   21.55   1
  -2   5  -9  224.83   14.80   2
   3  -5   9  115.59   16.00   1
  -3   5  -9  118.87   10.52   2
  -4   5  -9  199.15   14.94   2
   4  -5   9  232.03   23.14   1
  -5   5  -9   70.06    9.56   2
   5  -5   9   53.52   17.15   1
   5   4  -9    6.32    7.42   1
   4   4  -9  160.76   14.65   1
   3   4  -9  651.35   38.32   1
   3   4  -9  544.13   32.59   2
   2   4  -9  171.99   14.09   2
   2   4  -9  224.19   15.94   1
   1   4  -9 2088.79  123.47   1
   1   4  -9 2076.73  103.28   2
   0   4  -9   40.88    7.01   1
   0   4  -9   41.09    6.50   2
   1  -4   9 1484.52   90.11   1
  -1   4  -9 1515.78   74.76   2
   2  -4   9  152.78   16.84   1
  -2   4  -9  149.98   11.30   2
  -3   4  -9  269.31   16.90   2
   3  -4   9  282.52   24.03   1
  -4   4  -9   24.61    6.10   3
   4  -4   9   13.92   12.77   1
  -4   4  -9   19.82    6.41   2
  -5   4  -9    5.79    5.72   3
   5  -4   9    5.22   14.21   1
  -5   4  -9   -2.57    6.03   2
   4   3  -9    5.36    6.69   2
   4   3  -9   -2.30    4.86   1
   3   3  -9 1069.70   51.31   2
   3   3  -9  926.01   59.88   1
   2   3  -9  299.54   20.02   1
   2   3  -9  275.36   17.75   2
   1   3  -9 1359.99   81.25   1
   0   3  -9  821.66   41.61   2
   0   3  -9  799.32   49.53   1
   1  -3   9   70.76   10.09   1
  -1   3  -9   72.09    7.02   2
  -2   3  -9 1297.66   62.01   3
   2  -3   9 1231.38   76.84   1
  -2   3  -9 1235.74   62.88   2
  -3   3  -9   22.68    5.22   3
  -3   3  -9   24.45    5.44   2
   3  -3   9   17.15   10.27   1
  -4   3  -9  111.96    9.53   2
  -4   3  -9  110.40    9.64   3
   4  -3   9   97.45   16.04   1
  -5   3  -9  257.10   17.10   3
   5  -3   9  214.82   24.86   1
  -5   3  -9  267.37   16.69   2
  -6   3  -9   12.59    6.51   3
   6  -3   9   28.19   16.98   1
   6  -3   9   13.18    7.50   2
   5   2  -9   19.43    7.85   2
   4   2  -9  168.14   14.29   2
   4   2  -9  165.01   13.04   1
   3   2  -9  377.90   24.44   2
   3   2  -9  422.28   25.98   1
   2   2  -9  168.24   12.27   2
   2   2  -9  134.23   11.93   1
   1   2  -9 1331.17   64.32   2
   1   2  -9 1239.26   76.26   1
   0  -2   9  222.22   15.64   1
   0   2  -9  160.80   12.27   2
   1  -2   9  400.99   29.53   1
  -1   2  -9  425.35   21.52   3
  -1   2  -9  416.18   22.74   2
   2  -2   9   22.37    8.62   1
  -2   2  -9   12.95    4.51   2
  -2   2  -9   13.27    4.14   3
  -3   2  -9   55.29    6.37   2
   3  -2   9   59.88   11.63   1
  -3   2  -9   61.29    6.83   3
   4  -2   9  111.84   16.73   1
  -4   2  -9  114.65   10.16   2
  -4   2  -9  118.63   10.00   3
  -5   2  -9   15.97    5.61   2
   5  -2   9    9.61   14.36   1
  -5   2  -9   13.91    6.29   3
  -6   2  -9  410.40   24.20   3
   6  -2   9  353.24   34.20   1
   6   1  -9   34.71    7.93   2
   5   1  -9 1050.46   54.25   2
   4   1  -9   60.60    7.64   2
   3   1  -9 2804.51  140.49   2
   3   1  -9 2909.18  167.04   1
   2   1  -9 1155.19   65.85   1
   2   1  -9 1054.32   56.47   2
  -1  -1   9 3967.02  252.82   1
   1   1  -9 4364.02  211.61   2
   1   1  -9 4690.16  208.79   3
   0   1  -9 1392.60   67.20   2
   0  -1   9 1306.91   81.10   1
   1  -1   9  314.48   21.14   1
  -1   1  -9  261.42   15.38   3
  -1   1  -9  263.88   15.78   2
  -2   1  -9  403.53   21.74   2
  -2   1  -9  409.31   22.00   3
   2  -1   9  394.85   29.12   1
  -3   1  -9  309.22   17.39   2
   3  -1   9  274.95   25.89   1
  -3   1  -9  322.08   18.25   3
   4  -1   9   90.45   16.30   1
  -4   1  -9  123.02   10.28   3
  -4   1  -9  107.69    9.55   2
   5  -1   9  102.39   17.66   1
  -5   1  -9  115.74   10.72   3
   6  -1   9   -0.96   15.24   1
  -6   1  -9    4.94    5.88   3
   6   0  -9   27.01    8.16   2
   5   0  -9    5.23    6.77   2
   4   0  -9   37.06    7.04   2
  -3   0   9  123.71    8.52   3
   3   0  -9  118.54   10.02   2
   2   0  -9 1061.30   52.94   2
  -2   0   9 1039.79   51.62   3
  -1   0   9  259.33   17.36   1
   1   0  -9  232.39   13.83   3
   1   0  -9  198.61   15.33   2
   0   0  -9 1045.65   52.83   2
   0   0  -9 1064.97   52.12   3
   0   0   9 1055.73   63.82   1
  -1   0  -9   70.87    6.73   3
   1   0   9   71.45   10.09   1
  -1   0  -9   78.05    6.65   2
   2   0   9   61.17   11.71   1
  -2   0  -9   38.87    5.99   3
  -2   0  -9   75.55    5.74   2
   3   0   9  579.60   45.01   1
  -3   0  -9  711.40   35.82   3
  -3   0  -9  713.58   34.55   2
  -4   0  -9  492.58   26.64   3
   4   0   9  448.46   35.16   1
  -5   0  -9   94.63   10.40   3
   5   0   9   79.12   16.27   1
  -6   0  -9  368.48   23.47   3
   6   0   9  418.88   33.81   1
   6  -1  -9   37.02    8.94   2
  -5   1   9 1050.22   53.86   3
   5  -1  -9 1080.05   55.66   2
   4  -1  -9  375.16   22.05   2
  -4   1   9  358.25   20.42   3
  -3   1   9 3167.95  155.67   3
   3  -1  -9 3257.48  157.56   2
   2  -1  -9  322.34   18.87   2
  -2   1   9  348.91   18.45   3
  -1   1   9  639.48   44.87   1
   1  -1  -9  815.16   38.11   2
   1  -1  -9  767.16   37.48   3
   0  -1  -9  679.10   34.15   2
   0  -1  -9  656.64   34.14   3
   1   1   9  140.04   14.95   1
  -1  -1  -9  166.29   10.91   2
  -1  -1  -9  189.43   11.91   3
  -2  -1  -9  368.27   21.67   3
   2   1   9  404.31   28.84   1
  -3  -1  -9   48.45    7.47   3
   3   1   9   76.91   13.21   1
  -4  -1  -9  419.82   25.03   3
   4   1   9  442.07   32.85   1
   5   1   9    5.47   11.97   1
  -5  -1  -9    1.16    6.30   3
   6  -2  -9    7.97    8.27   2
  -6   2   9    8.46    6.82   3
  -5   2   9  267.36   17.36   3
   5  -2  -9  280.35   19.12   2
  -4   2   9  372.10   21.26   3
   4  -2  -9  379.00   22.92   2
   3  -2  -9  160.36   12.62   2
  -3   2   9  161.02   11.29   3
   2  -2  -9 1098.70   54.15   3
   2  -2  -9 1072.72   54.75   2
   1  -2  -9    7.94    4.84   2
   1  -2  -9   10.25    4.57   3
   0  -2  -9  594.25   29.99   2
   0  -2  -9  575.43   30.57   3
   0   2   9  563.68   36.52   1
   1   2   9  599.88   39.83   1
  -1  -2  -9  634.58   32.64   3
   2   2   9   14.62    9.61   1
  -2  -2  -9   27.59    6.35   3
  -3  -2  -9  111.62   10.47   3
   3   2   9  131.56   15.35   1
   4   2   9  368.32   27.46   1
  -4  -2  -9  278.21   19.89   3
  -5  -2  -9   41.01    8.98   3
   5   2   9   52.32   13.44   1
   6  -3  -9   57.30   11.40   2
  -6   3   9   53.48    9.88   3
   5  -3  -9  646.49   35.83   2
  -5   3   9  627.81   34.79   3
  -4   3   9   11.60    5.96   3
   4  -3  -9   17.40    7.38   2
  -3   3   9  442.19   24.84   3
   3  -3  -9  453.00   25.54   2
   2  -3  -9    3.69    5.44   2
   2  -3  -9    4.15    4.72   3
   1  -3  -9  131.09   11.44   3
   1  -3  -9  167.72   10.93   2
   0  -3  -9  101.30    9.72   3
   1   3   9   31.98    8.38   1
  -1  -3  -9   30.12    6.67   3
  -2  -3  -9  572.05   31.36   3
   2   3   9  572.42   38.56   1
  -3  -3  -9    2.61    6.45   3
   3   3   9    8.07   10.21   1
   4   3   9  540.60   35.39   1
  -4  -3  -9  417.07   27.28   3
   5  -4  -9  652.06   37.14   2
  -5   4   9  670.60   36.87   3
  -4   4   9  405.63   23.73   3
   4  -4  -9  388.52   23.85   2
   3  -4  -9   39.43    7.75   2
   2  -4  -9  456.08   25.56   3
   1  -4  -9   22.78    8.18   3
   0  -4  -9  363.72   22.05   3
  -1  -4  -9  150.03   12.74   3
   2   4   9   -5.82    8.34   1
  -2  -4  -9    3.71    7.09   3
  -3  -4  -9   26.86    8.20   3
   3   4   9   10.98   10.87   1
   4   4   9   -4.73    9.26   1
  -5   5   9   77.35   11.60   3
   5  -5  -9   63.13   11.46   2
  -4   5   9  118.36   12.21   3
   4  -5  -9   90.73   10.77   2
   3  -5  -9  161.08   12.97   3
   2  -5  -9    4.08    7.29   3
   1  -5  -9   83.27   11.93   3
   0  -5  -9  198.84   15.70   3
  -1  -5  -9   55.87    9.67   3
  -2  -5  -9  591.82   33.78   3
   3  -6  -9   27.75    8.56   3
   2  -6  -9  219.67   18.80   3
   1  -6  -9   26.36   10.61   3
  -1  -6  -9    1.80    9.32   3
   1   7 -10   28.07    8.89   1
   0   7 -10  158.77   16.00   1
  -1   7 -10   18.32    6.91   2
   1  -7  10   20.79   11.41   1
  -2   7 -10   83.77   10.06   2
   2  -7  10  104.46   17.24   1
  -3   7 -10   30.73    7.90   2
   3  -7  10    9.94   17.38   1
   3   6 -10  407.63   29.69   1
   2   6 -10   12.29    7.98   1
   1   6 -10  494.21   33.70   1
   0   6 -10   43.18    9.02   1
   0   6 -10   34.40    7.68   2
   1  -6  10  401.41   29.67   1
  -1   6 -10  416.00   23.91   2
   2  -6  10   39.11   13.40   1
  -2   6 -10   57.77    8.40   2
   3  -6  10    9.35   13.86   1
  -3   6 -10   -3.61    6.58   2
  -4   6 -10  189.32   14.81   2
   4  -6  10  197.16   22.04   1
   4   5 -10   31.06    8.85   1
   3   5 -10  563.91   37.12   1
   2   5 -10  370.24   26.02   1
   1   5 -10  123.80   10.77   2
   1   5 -10  116.00   12.09   1
   0   5 -10  661.80   34.09   2
   0   5 -10  603.60   40.53   1
  -1   5 -10   -2.15    5.72   2
   1  -5  10    1.79    8.45   1
   2  -5  10  432.85   33.08   1
  -2   5 -10  430.11   24.53   2
  -3   5 -10  172.63   13.70   2
   3  -5  10  194.37   19.55   1
   4  -5  10   14.37   13.28   1
  -4   5 -10   -8.58    6.68   2
  -5   5 -10   95.72   11.05   2
   5  -5  10   88.08   19.57   1
   4   4 -10    3.59    5.50   1
   3   4 -10  374.82   25.85   1
   3   4 -10  385.46   22.94   2
   2   4 -10   40.63    7.76   2
   2   4 -10   53.51    7.94   1
   1   4 -10  375.52   25.44   1
   1   4 -10  354.85   21.96   2
   0   4 -10   27.28    6.60   1
   0   4 -10   25.91    6.35   2
   1  -4  10  178.78   17.36   1
  -1   4 -10  198.05   13.26   2
  -2   4 -10  176.19   12.67   2
   2  -4  10  177.15   18.39   1
   3  -4  10   20.96   11.14   1
  -3   4 -10   36.25    6.68   2
  -4   4 -10  622.72   35.88   2
   4  -4  10  731.46   46.78   1
  -5   4 -10   75.04    9.00   3
  -5   4 -10   65.26    9.11   2
   5  -4  10   53.76   17.16   1
   4   3 -10  194.04   14.73   2
   4   3 -10  147.31   13.25   1
   3   3 -10 1184.23   58.21   2
   3   3 -10 1092.12   68.43   1
   2   3 -10  697.00   43.69   1
   2   3 -10  711.42   37.19   2
   1   3 -10  260.12   17.46   2
   1   3 -10  305.73   20.36   1
   0   3 -10  517.70   29.50   2
   0  -3  10  580.94   35.50   1
   1  -3  10  158.86   15.70   1
  -1   3 -10  171.85   12.25   2
  -2   3 -10  179.59   12.73   2
   2  -3  10  174.51   18.17   1
   3  -3  10  130.73   15.29   1
  -3   3 -10  134.41   10.39   3
  -3   3 -10  115.19   10.42   2
   4  -3  10   73.01   14.86   1
  -4   3 -10   62.47    7.92   2
  -4   3 -10   74.75    8.17   3
   5  -3  10  -22.82   14.57   1
  -5   3 -10   -2.53    5.81   2
  -5   3 -10    0.05    5.62   3
   5   2 -10   16.24    8.57   2
   4   2 -10  263.01   18.89   2
   3   2 -10    6.36    6.89   2
   3   2 -10   -1.63    4.05   1
   2   2 -10  688.66   42.58   1
   2   2 -10  699.76   36.64   2
   1   2 -10  115.92    9.64   2
   1   2 -10   94.54   10.28   1
   0  -2  10  352.02   23.93   1
   0   2 -10  328.21   19.56   2
  -1   2 -10  357.57   18.31   3
   1  -2  10  345.53   25.68   1
  -1   2 -10  325.87   19.85   2
  -2   2 -10  882.26   44.76   2
   2  -2  10  874.74   55.04   1
  -2   2 -10  878.29   44.25   3
  -3   2 -10  507.10   26.98   2
   3  -2  10  490.77   35.38   1
  -3   2 -10  497.99   27.05   3
  -4   2 -10  757.31   38.00   2
   4  -2  10  671.49   49.05   1
  -4   2 -10  724.38   38.32   3
   5  -2  10   63.92   17.80   1
  -5   2 -10   62.67    7.79   2
  -5   2 -10   73.65    8.88   3
  -6   2 -10  577.29   31.54   3
   6  -2  10  490.53   42.91   1
   6   1 -10   15.89    7.85   2
   5   1 -10 1130.74   58.57   2
   4   1 -10   87.05    9.25   2
   3   1 -10  717.44   38.09   2
   2   1 -10  201.98   13.61   1
   2   1 -10  151.02   13.27   2
  -1  -1  10    6.85    5.48   1
   1   1 -10    5.14    4.84   2
   0  -1  10  191.08   16.78   1
   0   1 -10  202.22   12.43   2
   0   1 -10  161.15   10.57   3
   1  -1  10  209.93   16.19   1
  -1   1 -10  153.27   11.10   2
  -1   1 -10  139.92   10.51   3
  -2   1 -10 1219.78   63.66   3
  -2   1 -10 1306.93   63.83   2
   2  -1  10 1318.49   78.25   1
  -3   1 -10   19.60    4.89   2
   3  -1  10   15.88   11.85   1
  -3   1 -10   19.99    5.63   3
  -4   1 -10  554.58   30.09   3
  -4   1 -10  584.63   29.37   2
   4  -1  10  466.55   39.46   1
  -5   1 -10  129.44   11.56   3
   5  -1  10   99.53   18.74   1
   6  -1  10  145.84   22.22   1
   6   0 -10  194.03   15.46   2
   5   0 -10  142.76   12.25   2
   4   0 -10  779.99   41.08   2
   3   0 -10   39.30    6.50   2
  -3   0  10   42.36    4.97   3
   2   0 -10 1725.75   76.92   3
   2   0 -10 1419.36   78.58   2
  -1   0  10  327.64   21.88   1
   1   0 -10  316.42   19.06   2
   1   0 -10  304.98   17.48   3
   0   0  10   -5.28    6.80   1
   0   0 -10    9.63    3.73   3
   0   0 -10    2.36    4.45   2
  -1   0 -10  571.73   28.58   3
  -1   0 -10  485.75   28.55   2
   1   0  10  587.87   36.01   1
   2   0  10  261.27   24.69   1
  -2   0 -10  299.89   16.41   2
  -3   0 -10   72.83    8.19   3
   3   0  10   46.15   13.89   1
  -4   0 -10  636.94   33.50   3
   4   0  10  587.36   43.66   1
   5   0  10   23.48   14.59   1
  -5   0 -10   17.79    7.34   3
   6  -1 -10   18.68    8.27   2
   5  -1 -10  232.31   17.18   2
   4  -1 -10    9.61    6.59   2
  -4   1  10   17.91    5.07   3
   3  -1 -10  126.31   10.74   2
  -3   1  10  106.56    8.79   3
   2  -1 -10   79.21    8.02   2
   2  -1 -10   95.29    7.05   3
   1  -1 -10   -1.25    6.00   2
   1  -1 -10  -12.13    4.01   3
   0   1  10 1040.17   74.41   1
   0  -1 -10 1325.14   61.17   3
   0  -1 -10 1314.71   61.37   2
  -1  -1 -10   63.17    6.37   2
   1   1  10   30.03   10.43   1
  -1  -1 -10   72.53    6.99   3
   2   1  10 1346.32   96.51   1
  -2  -1 -10 1832.18   79.32   3
   3   1  10  204.13   21.16   1
  -3  -1 -10  170.83   13.63   3
  -4  -1 -10  756.33   42.71   3
   4   1  10  864.97   54.35   1
  -5  -1 -10  187.23   15.14   3
   5   1  10  205.00   21.76   1
   6  -2 -10  275.99   19.94   2
   5  -2 -10  218.49   17.01   2
  -5   2  10  215.31   14.77   3
  -4   2  10  398.58   22.92   3
   4  -2 -10  414.40   24.13   2
   3  -2 -10   48.58    7.47   2
  -3   2  10   30.94    6.21   3
   2  -2 -10  517.95   27.87   3
   2  -2 -10  543.30   28.43   2
   1  -2 -10  102.60    8.84   2
   1  -2 -10   90.36    9.03   3
   0  -2 -10   18.40    5.67   3
   0  -2 -10   12.84    4.65   2
  -1  -2 -10   86.71    8.49   3
   1   2  10   52.06   10.03   1
  -2  -2 -10   55.80    8.02   3
   2   2  10   60.56   12.42   1
   3   2  10   98.68   14.83   1
  -3  -2 -10   78.51    9.29   3
   4   2  10   13.35   12.67   1
  -4  -2 -10   23.83    8.18   3
  -5  -2 -10   50.25    8.95   3
   5   2  10   73.75   14.75   1
  -6   3  10  196.38   16.10   3
   6  -3 -10  185.95   16.75   2
  -5   3  10   39.97    8.27   3
   5  -3 -10   56.99   10.19   2
  -4   3  10   94.49    9.64   3
   4  -3 -10   81.92   10.07   2
  -3   3  10  133.43   11.22   3
   3  -3 -10  104.66   10.32   2
   2  -3 -10   93.34    8.67   2
   2  -3 -10   77.71    8.46   3
   1  -3 -10  155.94   13.70   3
   1  -3 -10  201.00   12.85   2
   0  -3 -10 1037.15   53.00   3
  -1  -3 -10   94.95    9.50   3
   1   3  10   88.77   11.71   1
   2   3  10 1304.44   83.14   1
  -2  -3 -10 1397.79   68.44   3
   3   3  10  173.55   18.46   1
  -3  -3 -10  144.07   12.85   3
   4   3  10  308.92   26.07   1
  -4  -3 -10  265.31   19.83   3
   5  -4 -10   20.32    9.41   2
  -5   4  10   18.90    8.64   3
  -4   4  10  347.94   21.78   3
   4  -4 -10  334.72   21.66   2
   3  -4 -10   58.56    8.35   3
   3  -4 -10   68.61    8.72   2
   2  -4 -10  281.28   18.30   3
   1  -4 -10    6.15    8.14   3
   0  -4 -10  557.09   30.92   3
  -1  -4 -10   31.91    7.94   3
   2   4  10   79.20   12.61   1
  -2  -4 -10   74.76   10.13   3
  -3  -4 -10  237.75   17.77   3
   3   4  10  233.70   22.67   1
   4  -5 -10   51.92    8.91   2
   4  -5 -10   64.37    8.89   3
   3  -5 -10   55.14    8.93   3
   2  -5 -10  174.54   14.83   3
   1  -5 -10   30.14    9.86   3
   0  -5 -10  427.24   25.75   3
  -1  -5 -10    8.34    8.01   3
  -2  -5 -10  315.21   21.70   3
   3  -6 -10   15.98    7.19   3
   2  -6 -10  382.39   26.03   3
   1  -6 -10   31.22   10.92   3
   0  -6 -10  317.20   21.84   3
   1   7 -11    9.04    7.71   1
   0   7 -11  293.22   23.15   1
  -1   7 -11   14.53    7.26   2
   1  -7  11    5.22   12.03   1
  -2   7 -11   52.16    8.98   2
   2  -7  11   64.22   17.74   1
   3   6 -11  108.34   13.88   1
   2   6 -11   26.95    9.38   1
   1   6 -11  112.30   13.11   1
   0   6 -11   49.85    8.54   2
   0   6 -11   51.30    9.61   1
  -1   6 -11   77.94    9.19   2
   1  -6  11   52.60   12.10   1
  -2   6 -11  324.79   20.07   2
   2  -6  11  285.81   28.22   1
  -3   6 -11   41.08    8.40   2
   3  -6  11   33.98   15.02   1
  -4   6 -11  644.58   36.43   2
   4  -6  11  678.37   47.45   1
   4   5 -11  147.43   15.68   1
   3   5 -11  174.56   16.25   1
   2   5 -11  443.92   26.68   2
   2   5 -11  462.91   31.11   1
   1   5 -11    3.55    6.86   2
   1   5 -11    4.26    6.65   1
   0   5 -11  433.38   30.31   1
   0   5 -11  460.51   25.84   2
   1  -5  11   22.70    9.86   1
  -1   5 -11   17.96    6.74   2
  -2   5 -11  275.17   17.51   2
   2  -5  11  264.13   26.08   1
   3  -5  11   -3.64   11.35   1
  -3   5 -11    9.14    6.59   2
  -4   5 -11   53.69    9.34   2
   4  -5  11   55.40   15.86   1
   4   4 -11  309.80   22.51   1
   3   4 -11   64.16    8.86   1
   2   4 -11  152.91   13.54   2
   2   4 -11  183.62   15.29   1
   1   4 -11    9.55    6.44   1
   1   4 -11    6.55    6.90   2
   0   4 -11  104.38    9.96   2
   1  -4  11  209.17   20.53   1
  -1   4 -11  252.64   15.74   2
  -2   4 -11  773.84   40.53   2
   2  -4  11  773.13   50.92   1
   3  -4  11   22.19   11.13   1
  -3   4 -11   13.93    6.18   2
   4  -4  11  683.74   46.63   1
  -4   4 -11  643.98   35.94   2
   5  -4  11   15.25   16.83   1
  -5   4 -11   31.52    8.47   2
   4   3 -11   91.61    9.37   1
   4   3 -11   85.62   10.02   2
   3   3 -11  121.51   12.27   1
   3   3 -11  131.38   11.16   2
   2   3 -11  330.84   20.95   2
   2   3 -11  380.63   24.49   1
   1   3 -11    9.70    5.96   2
   1   3 -11    9.66    5.62   1
   0  -3  11 1179.42   63.63   1
   0   3 -11  895.99   52.62   2
  -1   3 -11  187.55   13.28   2
   1  -3  11  180.42   17.93   1
  -2   3 -11 1278.40   62.26   2
   2  -3  11 1178.08   75.27   1
   3  -3  11  459.38   33.37   1
  -3   3 -11  451.48   25.49   2
  -4   3 -11  497.48   28.76   3
  -4   3 -11  529.00   28.76   2
   4  -3  11  527.58   38.04   1
  -5   3 -11  414.08   24.66   2
   5  -3  11  375.82   35.37   1
  -5   3 -11  437.31   25.16   3
   5   2 -11    4.65    8.89   2
   4   2 -11  637.06   36.38   2
   3   2 -11    7.13    4.73   1
   3   2 -11    6.05    6.92   2
   2   2 -11  117.29   10.86   1
   2   2 -11   99.06    9.36   2
  -1  -2  11  682.60   43.81   1
   1   2 -11  724.33   36.92   2
   0  -2  11   49.48    9.77   1
   0   2 -11   58.41    7.07   2
   1  -2  11   38.92    9.42   1
  -1   2 -11   28.04    5.93   2
  -2   2 -11  669.78   34.95   2
  -2   2 -11  649.62   34.26   3
   2  -2  11  683.60   43.58   1
  -3   2 -11    3.58    5.24   3
   3  -2  11    3.35   10.50   1
  -3   2 -11   13.36    5.44   2
  -4   2 -11  106.66   10.16   3
  -4   2 -11  103.52    9.30   2
   4  -2  11  107.68   17.59   1
  -5   2 -11   80.92    8.54   2
  -5   2 -11   74.04    9.03   3
   5  -2  11   67.39   18.77   1
   6   1 -11   39.74    9.06   2
   5   1 -11  123.19   12.24   2
   4   1 -11   22.76    7.36   2
   3   1 -11   -2.11    6.62   2
   2   1 -11  703.00   39.28   2
  -2  -1  11  768.01   45.41   1
  -1  -1  11   97.89   11.07   1
   1   1 -11  102.70    8.69   2
   0   1 -11 3017.30  145.18   2
   0  -1  11 2907.56  174.10   1
  -1   1 -11  312.76   16.77   2
  -1   1 -11  248.26   15.84   3
  -2   1 -11 3024.67  140.92   2
   2  -1  11 3197.46  170.54   1
  -2   1 -11 2423.02  139.76   3
  -3   1 -11  581.16   33.70   3
  -3   1 -11  678.33   33.58   2
   3  -1  11  659.14   44.06   1
  -4   1 -11  401.53   23.57   3
   4  -1  11  387.76   32.89   1
   5  -1  11  237.50   26.48   1
  -5   1 -11  279.04   18.28   3
   6   0 -11  339.17   22.19   2
   5   0 -11    4.65    7.02   2
   4   0 -11  392.33   23.30   2
   3   0 -11  114.50   10.13   2
   2   0 -11  328.99   20.28   2
   1   0 -11   25.75    6.29   2
  -1   0  11   28.54    6.77   1
   1   0 -11   25.31    4.49   3
   0   0 -11   72.24    6.65   3
   0   0 -11   65.98    7.14   2
   0   0  11   74.50   10.26   1
   1   0  11  250.46   20.98   1
  -1   0 -11  264.27   15.08   3
  -1   0 -11  228.13   15.16   2
  -2   0 -11   17.93    4.69   2
  -2   0 -11   18.49    5.54   3
   2   0  11    4.82   11.26   1
  -3   0 -11  526.14   31.45   3
   3   0  11  667.53   42.05   1
   4   0  11    3.98   13.52   1
  -4   0 -11    6.75    6.46   3
  -5   0 -11  171.69   14.31   3
   5   0  11  172.16   21.92   1
   6  -1 -11  104.38   11.97   2
   5  -1 -11   26.61    8.38   2
   4  -1 -11   13.24    6.87   2
  -3   1  11  100.65    8.35   3
   3  -1 -11   87.67    9.17   2
   2  -1 -11 1070.01   52.51   3
   2  -1 -11 1034.60   53.67   2
   1  -1 -11   60.59    7.14   3
   1  -1 -11   65.49    8.61   2
   0   1  11 2641.27  158.17   1
   0  -1 -11 2672.59  130.11   3
   0  -1 -11 2707.89  130.98   2
  -1  -1 -11  465.41   24.10   2
  -1  -1 -11  474.09   24.83   3
   1   1  11  386.22   31.45   1
   2   1  11  801.14   59.33   1
  -2  -1 -11 1042.97   47.78   3
   3   1  11  135.69   18.48   1
  -3  -1 -11  172.65   13.19   3
  -4  -1 -11   20.59    8.12   3
   4   1  11   19.43   14.58   1
  -5  -1 -11   92.20   10.93   3
   5   1  11  107.60   17.83   1
   6  -2 -11  180.43   15.80   2
  -5   2  11    4.88    5.66   3
   5  -2 -11    1.14    7.98   2
  -4   2  11  265.00   17.27   3
   4  -2 -11  301.90   18.97   2
   3  -2 -11   10.02    6.39   2
   2  -2 -11  906.09   46.85   3
   2  -2 -11  937.14   47.41   2
   1  -2 -11  197.89   15.37   3
   1  -2 -11  232.49   15.66   2
   0  -2 -11  692.27   36.89   3
   0  -2 -11  724.06   36.41   2
  -1  -2 -11  974.70   42.45   3
   1   2  11  643.27   51.38   1
   2   2  11  158.72   18.57   1
  -2  -2 -11  210.81   14.54   3
   3   2  11  516.10   41.71   1
  -3  -2 -11  666.47   33.10   3
   4   2  11   -1.34   12.43   1
  -4  -2 -11    1.03    7.19   3
   5  -3 -11   50.66   10.02   2
  -5   3  11   45.37    8.66   3
  -4   3  11   44.71    7.99   3
   4  -3 -11   24.65    8.24   2
   3  -3 -11   50.88    7.73   3
   3  -3 -11   46.79    8.11   2
   2  -3 -11  500.75   28.58   3
   2  -3 -11  533.87   28.40   2
   1  -3 -11   10.37    7.70   3
   0  -3 -11  552.62   30.15   3
  -1  -3 -11   61.91    8.75   3
  -2  -3 -11  182.28   14.64   3
  -3  -3 -11    3.98    7.11   3
   3   3  11   25.34   13.27   1
  -4  -3 -11   25.17    8.14   3
   4   3  11   27.71   13.33   1
  -5   4  11   -0.13    8.88   3
   5  -4 -11    3.16    9.10   2
   4  -4 -11  682.01   37.32   2
   3  -4 -11   56.93    8.69   2
   3  -4 -11   51.91    8.59   3
   2  -4 -11  940.34   49.45   3
   1  -4 -11  456.00   27.97   3
   0  -4 -11  556.87   31.13   3
  -1  -4 -11  462.39   26.87   3
  -2  -4 -11   11.90    7.77   3
   3   4  11  304.51   27.23   1
  -3  -4 -11  345.73   21.71   3
   4  -5 -11   -9.16    5.75   3
   3  -5 -11   30.33    8.64   3
   2  -5 -11   19.46    9.88   3
   1  -5 -11  222.77   18.33   3
   0  -5 -11   50.23    9.71   3
  -1  -5 -11  103.57   12.43   3
   1  -7  12   45.05   14.77   1
  -1   7 -12   42.55    8.74   2
  -2   7 -12  165.32   13.39   2
   2  -7  12  125.57   21.76   1
   2   6 -12   10.92    9.26   1
   1   6 -12   23.84    7.97   2
   1   6 -12   12.58    8.66   1
   0   6 -12  252.95   18.17   2
  -1   6 -12    6.78    7.27   2
   1  -6  12   -3.47   10.74   1
  -2   6 -12  308.28   19.56   2
   2  -6  12  265.30   27.56   1
   3  -6  12   -3.57   14.31   1
  -3   6 -12  -10.16    6.62   2
   3   5 -12   11.35    7.93   1
   2   5 -12  360.14   26.71   2
   2   5 -12  560.77   32.31   1
   1   5 -12   67.45    9.83   2
   1   5 -12   70.60   10.27   1
   0   5 -12  910.54   47.94   2
   1  -5  12  227.09   22.07   1
  -1   5 -12  284.68   17.73   2
  -2   5 -12  570.12   31.50   2
   2  -5  12  554.99   41.23   1
   3  -5  12  567.00   40.72   1
  -3   5 -12  587.59   32.47   2
   4  -5  12   74.13   17.40   1
  -4   5 -12   78.20   10.94   2
   4   4 -12  294.30   21.87   1
   3   4 -12   44.56    8.26   2
   3   4 -12   34.11    7.76   1
   2   4 -12   -0.62    6.57   2
   2   4 -12    0.62    6.01   1
   1   4 -12   19.85    7.81   2
   1   4 -12   27.16    7.37   1
   0   4 -12   43.27    7.89   2
   0  -4  12   45.26   10.29   1
  -1   4 -12   52.20    8.21   2
   1  -4  12   76.81   13.39   1
   2  -4  12   85.21   14.09   1
  -2   4 -12   97.47    9.53   2
  -3   4 -12  290.65   18.67   2
   3  -4  12  284.51   24.72   1
   4  -4  12   16.38   14.38   1
  -4   4 -12    9.56    7.06   2
   5  -4  12    9.97   17.29   1
  -5   4 -12    3.26    8.02   2
   4   3 -12  147.93   12.63   2
   3   3 -12   15.05    6.01   1
   3   3 -12   18.25    7.06   2
   2   3 -12 1150.32   70.64   1
   2   3 -12 1184.41   59.71   2
   1   3 -12  119.80   10.56   2
   0   3 -12 1700.04   88.41   2
   0  -3  12 1840.31  106.21   1
   1  -3  12  619.27   40.51   1
  -1   3 -12  548.77   31.38   2
  -2   3 -12  691.86   35.92   2
   2  -3  12  650.83   44.00   1
   3  -3  12  342.76   28.55   1
  -3   3 -12  381.81   21.75   2
   4  -3  12   41.80   14.16   1
  -4   3 -12   36.93    7.39   2
   5  -3  12  171.45   24.38   1
  -5   3 -12  214.02   15.61   2
  -5   3 -12  177.69   14.46   3
   5   2 -12   -0.85    9.30   2
   4   2 -12  453.14   27.97   2
   3   2 -12   14.87    7.18   2
   2   2 -12  191.90   13.69   2
   2   2 -12  183.46   14.84   1
  -1  -2  12  153.77   16.58   1
   1   2 -12  206.06   13.52   2
   0   2 -12  184.88   13.21   2
   0  -2  12  180.38   17.42   1
   1  -2  12 1842.06  101.15   1
  -1   2 -12 1529.86   83.77   2
  -2   2 -12   86.13    8.31   2
   2  -2  12   79.38   12.71   1
  -3   2 -12  683.44   37.88   3
  -3   2 -12  758.79   38.20   2
   3  -2  12  730.32   48.37   1
  -4   2 -12    4.84    6.10   3
  -4   2 -12    7.42    5.68   2
   4  -2  12    7.42   13.96   1
   5  -2  12   50.90   19.34   1
  -5   2 -12   41.91    7.99   3
   5   1 -12   13.91    8.18   2
   4   1 -12  307.32   20.84   2
   3   1 -12    5.59    7.56   2
   2   1 -12 1486.98   74.95   2
   1   1 -12  109.11    9.10   2
  -1  -1  12   89.75   11.82   1
   0  -1  12 1929.69  120.71   1
   0   1 -12 2147.10  100.84   2
  -1   1 -12  122.02    9.58   3
   1  -1  12  157.19   14.59   1
  -1   1 -12  122.63   10.78   2
  -2   1 -12   59.78    6.93   2
   2  -1  12   70.76   12.28   1
  -2   1 -12   36.89    6.83   3
  -3   1 -12   65.66    7.03   2
  -3   1 -12   27.95    6.89   3
   3  -1  12   72.95   15.13   1
  -4   1 -12   10.87    6.91   3
   4  -1  12   33.75   15.84   1
  -5   1 -12  139.41   13.37   3
   5  -1  12  214.70   24.30   1
   6   0 -12  298.28   20.72   2
   5   0 -12   -0.88    7.32   2
   4   0 -12  591.36   33.10   2
   3   0 -12  324.32   20.52   2
   2   0 -12  739.72   39.88   2
   1   0 -12 1609.98   80.16   2
   0   0 -12  631.73   34.66   2
   0   0 -12  683.26   33.96   3
   0   0  12  676.61   42.37   1
  -1   0 -12 2644.41  125.04   3
  -1   0 -12 2468.48  125.95   2
   1   0  12 2587.68  152.30   1
   2   0  12   40.23   13.28   1
  -2   0 -12   43.88    6.90   3
  -2   0 -12   41.14    5.92   2
  -3   0 -12  457.54   28.12   3
   3   0  12  570.91   38.28   1
  -4   0 -12   14.31    7.16   3
   4   0  12   17.47   14.95   1
   5   0  12   -9.38   14.47   1
  -5   0 -12   -0.01    6.78   3
   6  -1 -12   13.73    7.37   2
   5  -1 -12    2.01    7.47   2
   4  -1 -12  147.85   13.09   2
   3  -1 -12    2.73    6.36   2
   2  -1 -12  489.31   27.88   2
   2  -1 -12  500.13   26.54   3
   1  -1 -12  104.89    8.63   3
   1  -1 -12   98.85    9.69   2
   0  -1 -12   14.05    5.09   2
   0  -1 -12    6.51    4.69   3
   1   1  12   51.56   12.39   1
  -1  -1 -12   54.08    6.49   2
  -1  -1 -12   50.24    6.92   3
   2   1  12    6.73   12.20   1
  -2  -1 -12   -2.66    5.31   3
  -3  -1 -12   23.25    7.28   3
   3   1  12   12.04   13.56   1
  -4  -1 -12    6.85    7.51   3
   4   1  12    9.61   14.51   1
   5  -2 -12   49.15    9.97   2
   4  -2 -12 1064.25   54.41   2
  -4   2  12 1018.67   53.14   3
   3  -2 -12  338.10   20.49   3
   3  -2 -12  384.18   21.82   2
   2  -2 -12 1318.06   67.55   3
   2  -2 -12 1377.88   68.34   2
   1  -2 -12  987.19   50.88   3
   1  -2 -12  989.38   51.11   2
   0  -2 -12   73.55    8.07   3
  -1  -2 -12  631.75   33.66   3
  -2  -2 -12   25.99    7.09   3
   2   2  12   13.30   11.97   1
  -3  -2 -12  224.28   15.17   3
   3   2  12  158.63   20.98   1
  -4  -2 -12   -0.45    7.44   3
   4   2  12   -8.90   12.68   1
  -5   3  12   22.04    8.19   3
   5  -3 -12   24.11    9.45   2
   4  -3 -12    5.75    7.70   2
   3  -3 -12  577.80   31.56   2
   3  -3 -12  565.47   31.13   3
   2  -3 -12   17.73    7.11   2
   2  -3 -12   -0.89    6.83   3
   1  -3 -12  687.96   37.66   3
   0  -3 -12   23.00    7.14   3
  -1  -3 -12  147.31   12.90   3
   2   3  12  -10.46   10.62   1
  -2  -3 -12   -2.26    7.07   3
   3   3  12   40.86   14.64   1
  -3  -3 -12   85.88   10.17   3
   4  -4 -12  587.22   32.34   3
   4  -4 -12  576.20   32.98   2
   3  -4 -12  156.51   13.81   3
   2  -4 -12   74.95   11.36   3
   1  -4 -12  222.50   17.56   3
   0  -4 -12   10.82    7.80   3
  -1  -4 -12  359.30   22.59   3
  -2  -4 -12   24.75    8.57   3
   3  -5 -12  496.38   30.02   3
   2  -5 -12   14.37   10.46   3
   1  -5 -12  307.14   21.22   3
   0  -5 -12    2.86    7.51   3
  -1  -5 -12   17.35    8.12   3
   2   6 -13   24.78   10.19   1
   1   6 -13  206.49   15.89   2
   1   6 -13  159.33   16.97   1
   0   6 -13   37.46    8.82   2
  -1   6 -13  278.80   18.74   2
   1  -6  13  245.09   24.74   1
   2  -6  13   -5.66   16.06   1
  -2   6 -13  -11.92    6.77   2
  -3   6 -13   56.51    9.01   2
   3  -6  13   48.32   16.22   1
   3   5 -13    7.16    8.17   1
   2   5 -13  368.31   23.63   2
   1   5 -13  157.24   14.39   2
   1   5 -13  194.77   16.95   1
   0   5 -13  415.93   25.33   2
   0  -5  13  418.59   30.86   1
   1  -5  13  215.83   23.68   1
  -1   5 -13  272.62   17.75   2
   2  -5  13   26.17   13.61   1
  -2   5 -13   44.22    8.37   2
  -3   5 -13  379.62   22.93   2
   3  -5  13  341.49   29.56   1
   4  -5  13   15.40   16.04   1
  -4   5 -13    6.65    8.76   2
   3   4 -13  125.12   13.42   1
   3   4 -13  128.03   12.02   2
   2   4 -13   88.23   10.09   2
   2   4 -13   77.21   10.52   1
   1   4 -13 1021.48   60.61   1
   1   4 -13  933.80   51.32   2
   0   4 -13  109.59   11.59   2
   0  -4  13  163.90   15.70   1
   1  -4  13  653.58   44.87   1
  -1   4 -13  633.54   35.00   2
   2  -4  13    6.74   11.18   1
  -2   4 -13    8.01    6.51   2
   3  -4  13  154.67   17.96   1
  -3   4 -13  162.88   13.76   2
  -4   4 -13    0.59    7.36   2
   4  -4  13   14.45   14.10   1
   5   3 -13    9.61    6.61   2
   4   3 -13  262.96   18.35   2
   3   3 -13    6.91    6.86   2
   3   3 -13    4.77    5.77   1
   2   3 -13  725.79   38.85   2
   2   3 -13  721.11   45.53   1
   1   3 -13   20.79    6.98   2
  -1  -3  13   27.61    9.43   1
   0   3 -13  144.22   12.99   2
   0  -3  13  177.34   17.25   1
   1  -3  13   25.09   11.18   1
  -1   3 -13   12.48    6.61   2
  -2   3 -13   36.49    7.47   2
   2  -3  13   60.98   11.60   1
  -3   3 -13  103.10   10.10   2
   3  -3  13  101.50   15.80   1
  -4   3 -13    1.62    6.58   2
   4  -3  13   -2.81   13.10   1
   5  -3  13  353.67   33.18   1
  -5   3 -13  297.86   21.01   2
   5   2 -13   36.67   10.12   2
   4   2 -13  509.57   30.36   2
   3   2 -13  666.05   36.25   2
   2   2 -13  369.24   22.71   2
  -2  -2  13  416.72   27.86   1
   1   2 -13 1891.22   89.44   2
  -1  -2  13 1687.65  107.26   1
   0   2 -13   97.76    9.38   2
   0  -2  13  101.45   13.61   1
  -1   2 -13 1036.66   52.63   2
   1  -2  13 1008.85   63.32   1
   2  -2  13   61.43   12.20   1
  -2   2 -13   44.46    7.19   2
   3  -2  13    5.19   11.58   1
  -3   2 -13   14.13    6.14   2
  -4   2 -13   -0.35    6.10   3
   4  -2  13   -5.40   14.70   1
  -4   2 -13   -1.17    6.11   2
  -5   2 -13    6.93    6.08   3
   5  -2  13   12.30   18.83   1
   5   1 -13  101.23   12.84   2
   4   1 -13   91.17   12.20   2
   3   1 -13  148.24   13.54   2
   2   1 -13   -0.10    5.94   2
   1   1 -13  446.90   24.16   2
  -1  -1  13  414.50   30.26   1
   0   1 -13   55.02    7.22   2
   0  -1  13   50.30    9.70   1
  -1   1 -13    1.76    5.19   2
   1  -1  13   11.66    9.82   1
   2  -1  13   92.11   13.45   1
  -2   1 -13   67.20    7.94   2
  -2   1 -13   73.52    8.27   3
  -3   1 -13  279.70   16.43   2
   3  -1  13  299.47   25.84   1
  -3   1 -13  206.17   16.05   3
   4  -1  13   21.99   15.83   1
  -4   1 -13   -2.65    6.55   3
  -5   1 -13  329.07   21.34   3
   5   0 -13   91.63   11.59   2
   4   0 -13  636.86   35.89   2
   3   0 -13  794.85   43.13   2
   2   0 -13  182.63   15.12   2
   1   0 -13  678.58   35.57   2
   0   0 -13    4.37    4.02   3
   0   0  13    5.86    8.27   1
   0   0 -13    7.01    5.19   2
  -1   0 -13  490.66   26.63   3
   1   0  13  499.51   35.30   1
  -1   0 -13  497.78   26.91   2
  -2   0 -13   17.14    5.27   2
   2   0  13   13.37   13.50   1
  -2   0 -13   12.16    5.97   3
   3   0  13   35.78   14.99   1
  -3   0 -13   34.90    7.96   3
  -4   0 -13   12.20    7.17   3
   4   0  13   29.64   15.83   1
   5  -1 -13  305.63   21.19   2
   4  -1 -13   96.21   11.11   2
   3  -1 -13 1314.36   67.40   2
   2  -1 -13    7.29    8.03   2
   1  -1 -13  347.68   20.04   3
   1  -1 -13  359.04   20.67   2
   0  -1 -13   41.77    6.43   3
   0  -1 -13   55.73    6.99   2
   1   1  13   14.37   11.72   1
  -1  -1 -13   10.23    5.60   3
  -2  -1 -13    2.12    5.65   3
   2   1  13   -5.73   12.46   1
   3   1  13  303.54   30.15   1
  -3  -1 -13  366.18   21.67   3
  -4  -1 -13    1.00    7.16   3
   4   1  13    7.92   15.28   1
   4  -2 -13  132.98   12.65   2
   3  -2 -13   44.37    8.57   2
   3  -2 -13   25.48    6.49   3
   2  -2 -13   -6.55    6.63   3
   2  -2 -13    7.15    7.70   2
   1  -2 -13  314.66   20.21   3
   1  -2 -13  353.26   20.35   2
   0  -2 -13   51.84    7.42   3
  -1  -2 -13  388.73   22.68   3
  -2  -2 -13   13.48    6.55   3
   2   2  13  -11.08   12.41   1
   3   2  13  258.20   27.78   1
  -3  -2 -13  316.58   19.60   3
  -4  -2 -13  110.96   11.69   3
   4   2  13  105.36   17.77   1
   5  -3 -13  562.45   33.14   2
   4  -3 -13   60.66    8.68   3
   4  -3 -13   41.55    9.29   2
   3  -3 -13  813.40   44.08   2
   3  -3 -13  839.13   43.79   3
   2  -3 -13    7.34    8.48   3
   2  -3 -13   12.83    7.61   2
   1  -3 -13  129.58   12.19   3
   0  -3 -13   -8.48    6.35   3
  -1  -3 -13    8.75    7.01   3
  -2  -3 -13   23.67    7.97   3
   3   3  13   74.13   16.41   1
  -3  -3 -13  104.06   11.01   3
   4  -4 -13    7.31    8.16   2
   4  -4 -13   14.43    7.30   3
   3  -4 -13    7.27    8.13   3
   2  -4 -13   48.91   11.20   3
   1  -4 -13  156.35   14.21   3
   0  -4 -13    3.48    7.45   3
  -1  -4 -13  414.56   24.76   3
  -2  -4 -13   60.91    9.84   3
   2  -5 -13    7.52    9.55   3
   1  -5 -13   57.06   10.28   3
   0  -5 -13    6.88    7.43   3
   1   6 -14  441.33   27.24   2
   1   6 -14  447.75   32.22   1
   0  -6  14    3.65   10.93   1
   0   6 -14    2.09    7.51   2
  -1   6 -14  182.25   15.15   2
   1  -6  14  148.41   20.11   1
  -2   6 -14   20.21    8.04   2
   2  -6  14   15.16   16.97   1
   3   5 -14    6.61    8.48   1
   2   5 -14   44.22   10.10   1
   2   5 -14   49.66    9.49   2
   1   5 -14    4.35    8.18   2
   0   5 -14    2.52    7.84   2
   0  -5  14    4.27   11.26   1
   1  -5  14   50.37   15.44   1
  -1   5 -14   57.99    9.43   2
   2  -5  14    8.71   13.09   1
  -2   5 -14    9.00    7.55   2
   3  -5  14  335.15   29.91   1
  -3   5 -14  374.21   23.34   2
   4   4 -14  210.03   15.99   2
   3   4 -14  538.75   36.36   1
   3   4 -14  562.46   31.31   2
   2   4 -14   63.64    9.68   2
   2   4 -14   69.10   10.04   1
  -1  -4  14  910.89   59.41   1
   1   4 -14  964.04   49.77   2
   0  -4  14   14.93   11.43   1
   0   4 -14    8.78    7.39   2
  -1   4 -14   96.62   10.61   2
   1  -4  14  108.93   17.16   1
   2  -4  14    4.89   11.27   1
  -2   4 -14    5.12    7.39   2
  -3   4 -14    4.51    7.62   2
   3  -4  14   10.06   12.34   1
   4  -4  14   66.94   16.91   1
  -4   4 -14   68.17   10.82   2
   4   3 -14   20.15    7.65   2
   3   3 -14  269.14   18.03   2
   2   3 -14   23.26    7.24   2
   1   3 -14   36.30    7.50   2
  -1  -3  14   27.43   10.58   1
   0   3 -14   43.59    7.64   2
   0  -3  14   51.63   13.94   1
   1  -3  14  161.65   16.68   1
  -1   3 -14  140.02   12.22   2
  -2   3 -14    2.88    6.36   2
   2  -3  14   10.15   10.35   1
  -3   3 -14  652.34   35.97   2
   3  -3  14  661.80   45.18   1
   4  -3  14   83.72   17.52   1
  -4   3 -14  102.74   11.04   2
   5   2 -14  172.68   15.60   2
   4   2 -14  146.27   13.46   2
   3   2 -14  516.41   29.11   2
   2   2 -14    8.78    6.29   2
  -1  -2  14  586.99   41.90   1
   1   2 -14  603.60   32.26   2
   0  -2  14   12.08    9.97   1
   0   2 -14   11.80    6.32   2
  -1   2 -14  245.71   16.25   2
   1  -2  14  223.02   20.73   1
  -2   2 -14   22.91    6.82   2
   2  -2  14   34.63   12.07   1
   3  -2  14   72.54   14.58   1
  -3   2 -14   86.00    9.23   2
  -4   2 -14  352.67   21.74   2
   5   1 -14  579.51   35.54   2
   4   1 -14   39.73   10.77   2
   3   1 -14  291.88   19.91   2
   2   1 -14   32.43    6.76   2
   1   1 -14    3.82    5.55   2
   0   1 -14   23.48    6.34   2
   0  -1  14   24.17    9.15   1
  -1   1 -14  644.91   33.97   2
   1  -1  14  624.86   42.23   1
  -2   1 -14   -0.66    5.54   2
   2  -1  14    2.60   10.94   1
  -3   1 -14  431.54   25.33   3
   3  -1  14  460.17   35.15   1
  -4   1 -14   17.77    7.76   3
   4  -1  14   39.62   16.35   1
   5   0 -14   -2.17    8.51   2
   4   0 -14   23.88    9.52   2
   3   0 -14  120.83   13.08   2
   2   0 -14   27.35    7.58   2
   1   0 -14  270.39   17.03   2
   0   0 -14   -5.02    4.95   2
  -1   0 -14  620.33   32.37   2
   1   0  14  627.93   41.62   1
  -1   0 -14  580.33   31.68   3
   2   0  14  313.79   29.12   1
  -2   0 -14  340.10   20.01   3
  -3   0 -14  260.15   18.75   3
   3   0  14  306.68   27.58   1
   4   0  14  663.21   47.83   1
  -4   0 -14  667.53   36.56   3
   5  -1 -14  584.86   34.94   2
   4  -1 -14   14.20    9.14   2
   3  -1 -14  311.02   21.26   2
   2  -1 -14    1.38    7.86   2
   1  -1 -14   14.83    5.95   2
   1  -1 -14   10.05    5.29   3
   0  -1 -14   29.80    6.38   3
   0  -1 -14   30.80    6.02   2
  -1  -1 -14   60.51    7.79   3
   2   1  14   55.74   15.53   1
  -2  -1 -14   59.88    8.05   3
   3   1  14   70.50   17.36   1
  -3  -1 -14   50.38    8.98   3
  -4  -1 -14  159.04   13.62   3
   4   1  14  115.62   20.02   1
   5  -2 -14    3.60    9.53   2
   4  -2 -14   70.68   11.20   2
   3  -2 -14   45.59    9.58   2
   2  -2 -14   66.29    9.92   3
   2  -2 -14   76.77   11.24   2
   1  -2 -14  819.05   43.16   3
   1  -2 -14  842.25   43.13   2
   0  -2 -14   86.18    8.95   3
  -1  -2 -14  653.00   35.14   3
  -2  -2 -14  295.81   18.79   3
   2   2  14  279.63   27.31   1
   3   2  14  211.43   23.28   1
  -3  -2 -14  194.84   15.55   3
   4  -3 -14   -2.40    8.73   2
   3  -3 -14  145.99   13.38   2
   3  -3 -14  131.23   13.01   3
   2  -3 -14    0.36    8.55   3
   1  -3 -14   13.70    7.81   3
   0  -3 -14  317.12   19.94   3
  -1  -3 -14   13.96    7.41   3
  -2  -3 -14  531.89   30.27   3
   3  -4 -14   84.58   12.32   3
   2  -4 -14   -5.44    9.40   3
   1  -4 -14  266.18   18.81   3
   0  -4 -14   14.88    7.83   3
  -1  -4 -14  136.22   12.98   3
  -1  -6  15  271.02   21.84   1
   1   6 -15  198.68   17.33   2
   0  -6  15   15.09   11.88   1
   0   6 -15   15.03    8.16   2
   1  -6  15   11.17   14.78   1
  -1   6 -15   33.78    8.85   2
   2   5 -15   32.58    9.90   1
   2   5 -15   24.03    8.38   2
  -1  -5  15   37.72   12.56   1
   1   5 -15   39.13    9.55   2
   0  -5  15    0.63   12.10   1
   0   5 -15   -3.67    7.80   2
  -1   5 -15  238.07   18.23   2
   1  -5  15  281.59   27.55   1
   2  -5  15   35.35   13.76   1
  -2   5 -15   26.17    8.49   2
  -3   5 -15  299.19   21.16   2
   3  -5  15  286.53   27.50   1
   3   4 -15  286.84   19.16   2
   2   4 -15    7.79    7.33   2
  -1  -4  15  302.05   25.79   1
   1   4 -15  297.91   20.25   2
   0  -4  15   53.12   15.38   1
   0   4 -15   55.47    9.36   2
  -1   4 -15  125.84   12.51   2
   1  -4  15  154.50   18.98   1
  -2   4 -15  236.12   18.45   2
   2  -4  15  282.33   23.93   1
   3  -4  15  122.73   17.66   1
  -3   4 -15  125.23   12.90   2
   4   3 -15    9.32    7.14   2
   3   3 -15   96.02   10.31   2
   2   3 -15  107.12   10.64   2
  -2  -3  15  115.37   14.33   1
  -1  -3  15  120.50   16.00   1
   1   3 -15  105.18   10.58   2
   0  -3  15   42.62   14.47   1
   0   3 -15   42.01    7.82   2
   1  -3  15  209.25   21.76   1
  -1   3 -15  273.70   17.33   2
  -2   3 -15   16.36    7.36   2
   2  -3  15   14.79   11.51   1
   3  -3  15  113.16   16.62   1
  -3   3 -15  121.70   11.94   2
  -4   3 -15    0.32    7.91   2
   4  -3  15   10.49   13.52   1
   4   2 -15   18.81    8.09   2
   3   2 -15  271.04   18.17   2
   2   2 -15   -1.75    6.06   2
   1   2 -15  511.82   27.89   2
  -1  -2  15  482.99   37.63   1
   0   2 -15  273.42   17.71   2
   0  -2  15  255.41   22.99   1
   1  -2  15  388.02   29.74   1
  -1   2 -15  435.03   24.38   2
   2  -2  15  908.73   56.38   1
  -2   2 -15  840.22   45.60   2
  -3   2 -15  227.69   16.85   2
   3  -2  15  241.48   23.67   1
   4  -2  15  647.12   46.88   1
   5   1 -15  251.93   20.77   2
   4   1 -15   24.14   10.07   2
   3   1 -15    7.38    7.44   2
   2   1 -15   69.53    8.37   2
   1   1 -15   -3.31    5.67   2
   0  -1  15  268.36   23.25   1
   0   1 -15  296.44   17.86   2
   1  -1  15   18.01   10.34   1
  -1   1 -15   40.36    7.28   2
  -2   1 -15  370.42   22.05   2
   2  -1  15  371.72   29.48   1
   3  -1  15  131.57   19.76   1
   4  -1  15  104.28   19.19   1
  -4   1 -15  122.90   11.47   3
   5   0 -15   10.17    9.16   2
   4   0 -15   74.15   12.86   2
   3   0 -15  346.21   23.49   2
   2   0 -15   51.55    8.17   2
   1   0 -15  851.53   44.17   2
   0   0 -15  420.75   23.78   2
   1   0  15  437.10   33.62   1
  -1   0 -15  449.87   24.97   2
   2   0  15  411.06   33.94   1
  -2   0 -15  428.48   24.16   3
   3   0  15   13.09   14.99   1
  -3   0 -15    8.23    7.58   3
  -4   0 -15  228.42   16.36   3
   4   0  15  203.90   23.61   1
   5  -1 -15  160.25   16.46   2
   4  -1 -15    5.84    9.76   2
   3  -1 -15   52.70   11.43   2
   2  -1 -15  210.58   16.24   2
   1  -1 -15  126.47   11.20   2
   0  -1 -15 1330.27   67.39   3
   0  -1 -15 1374.22   67.91   2
  -1  -1 -15  176.00   13.33   3
   2   1  15  608.96   43.52   1
  -2  -1 -15  588.42   32.35   3
  -3  -1 -15   67.42    9.47   3
   3   1  15   58.81   16.95   1
   4  -2 -15   13.66   10.53   2
   3  -2 -15  375.60   25.39   2
   2  -2 -15    2.61    8.30   2
   1  -2 -15  271.44   17.67   3
   0  -2 -15    1.79    6.35   3
  -1  -2 -15    0.17    6.42   3
  -2  -2 -15   30.23    7.29   3
   3   2  15   29.18   14.63   1
  -3  -2 -15   19.55    7.53   3
   4  -3 -15   72.83   12.88   2
   3  -3 -15  227.98   19.21   2
   3  -3 -15  220.40   18.20   3
   2  -3 -15  592.46   34.28   3
   1  -3 -15  104.46   11.37   3
   0  -3 -15  830.04   43.73   3
  -1  -3 -15  103.68   11.18   3
  -2  -3 -15  288.15   19.06   3
   2  -4 -15   98.02   12.86   3
   1  -4 -15   -9.20    7.92   3
   0  -4 -15   35.14    8.74   3
   2   5 -16   93.54   11.04   2
  -2  -5  16   96.01   14.32   1
   1   5 -16   55.29    9.93   2
  -1  -5  16   32.85   13.44   1
   0  -5  16  123.98   19.33   1
   0   5 -16  112.78   12.52   2
  -1   5 -16   11.64    8.08   2
   1  -5  16   -6.92   14.62   1
  -2   5 -16   24.50    9.00   2
   2  -5  16    3.03   12.46   1
   3   4 -16  251.36   17.78   2
   2   4 -16   62.44    9.72   2
  -2  -4  16   88.98   14.15   1
   1   4 -16  300.87   19.57   2
  -1  -4  16  274.67   26.52   1
   0   4 -16  422.49   26.19   2
   0  -4  16  448.97   36.95   1
  -1   4 -16  218.98   17.15   2
   1  -4  16  222.79   23.49   1
  -2   4 -16  583.35   35.79   2
   2  -4  16  684.44   43.90   1
   3  -4  16    6.98   12.93   1
  -3   4 -16   14.17    9.65   2
   3   3 -16    5.94    7.08   2
   2   3 -16  445.30   25.93   2
   1   3 -16   -8.54    6.36   2
  -1  -3  16   11.80   14.98   1
   0  -3  16  369.64   31.61   1
   0   3 -16  379.61   22.82   2
   1  -3  16   65.25   13.71   1
  -1   3 -16   82.37   10.09   2
   2  -3  16  438.99   32.25   1
  -2   3 -16  397.50   25.28   2
   3  -3  16  120.39   16.63   1
  -3   3 -16   97.54   11.86   2
   4   2 -16   -0.20    7.13   2
   3   2 -16  259.77   17.95   2
   2   2 -16   66.97    8.75   2
   1   2 -16  215.91   15.24   2
   0  -2  16  343.38   28.07   1
   0   2 -16  386.69   22.41   2
  -1   2 -16   -6.98    6.37   2
   1  -2  16   -1.82   10.74   1
  -2   2 -16  175.22   14.42   2
   2  -2  16  185.77   18.96   1
  -3   2 -16    4.81    7.30   2
   3  -2  16   13.27   13.58   1
   4   1 -16  136.11   14.00   2
   3   1 -16   74.36    9.97   2
   2   1 -16  851.82   44.84   2
   1   1 -16  330.88   19.97   2
   0   1 -16 1188.30   60.57   2
   1  -1  16  124.38   15.31   1
  -1   1 -16  120.59   10.82   2
  -2   1 -16  241.61   16.50   2
   2  -1  16  251.10   24.42   1
   3  -1  16  162.88   21.63   1
   4   0 -16   36.58   12.35   2
   3   0 -16  135.52   13.57   2
   2   0 -16   10.78    6.85   2
   1   0 -16    8.42    6.15   2
   0   0 -16   34.83    7.00   2
  -1   0 -16  141.53   12.03   2
   2   0  16   52.11   16.01   1
  -3   0 -16   60.33    8.65   3
   3   0  16   44.96   16.08   1
   4  -1 -16  429.70   29.94   2
   3  -1 -16  201.38   17.53   2
   2  -1 -16 1002.98   52.32   2
   1  -1 -16  142.14   11.96   2
  -1  -1 -16   22.09    6.14   3
  -2  -1 -16  114.08   10.41   3
   3   1  16   27.90   15.63   1
  -3  -1 -16   18.28    7.63   3
   4  -2 -16  181.35   18.43   2
   3  -2 -16    8.69   11.14   2
   2  -2 -16  251.72   18.21   2
   0  -2 -16   11.40    6.69   3
  -1  -2 -16  204.70   15.53   3
  -2  -2 -16   31.35    7.43   3
   2  -3 -16  348.20   22.54   3
   1  -3 -16   -3.09    7.39   3
   0  -3 -16  197.67   15.75   3
  -1  -3 -16    4.62    6.95   3
   1   5 -17   14.88    7.71   2
  -1  -5  17    5.41   12.83   1
   0   5 -17  340.16   22.68   2
   0  -5  17  368.20   33.54   1
   1  -5  17  154.41   19.65   1
  -1   5 -17  114.50   12.45   2
   2   4 -17   56.89    9.18   2
  -1  -4  17   10.68   16.18   1
   1   4 -17  -10.66    6.76   2
   0  -4  17   73.96   18.87   1
   0   4 -17   92.41   11.06   2
   1  -4  17   22.59   13.73   1
  -1   4 -17   30.73    9.83   2
  -2   4 -17   99.60   12.82   2
   2  -4  17   91.61   15.93   1
   3   3 -17   69.63    9.53   2
   2   3 -17  910.50   48.10   2
  -1  -3  17  136.38   20.42   1
   1   3 -17  130.63   12.02   2
   0   3 -17  302.92   19.67   2
   0  -3  17  286.79   27.31   1
   1  -3  17  147.48   18.27   1
  -1   3 -17  174.52   14.67   2
  -2   3 -17   44.16    9.79   2
   2  -3  17   51.68   14.18   1
   3  -3  17   59.24   14.46   1
  -3   3 -17   61.45   11.03   2
   3   2 -17   -1.09    6.48   2
   2   2 -17   30.28    7.99   2
   1   2 -17  193.17   14.53   2
   0  -2  17   11.07   11.19   1
   0   2 -17    3.20    7.09   2
   1  -2  17  123.71   16.68   1
  -1   2 -17  127.69   11.81   2
  -2   2 -17   73.21    9.74   2
   2  -2  17   51.69   14.14   1
   3  -2  17  -11.97   12.90   1
  -3   2 -17   11.23    7.68   2
   4   1 -17  426.31   26.22   2
   3   1 -17   48.95    9.04   2
   2   1 -17  503.69   28.54   2
   1   1 -17   16.22    6.61   2
   0   1 -17  146.85   12.88   2
   1  -1  17   -0.49   11.35   1
  -1   1 -17   15.24    7.08   2
   2  -1  17    1.68   13.20   1
   3  -1  17   75.07   17.48   1
   4   0 -17  282.93   22.88   2
   3   0 -17  182.27   15.84   2
   2   0 -17  139.90   12.23   2
   1   0 -17  274.45   17.94   2
   0   0 -17    9.79    6.34   2
   2   0  17  151.55   20.33   1
   3   0  17    1.49   13.70   1
   3  -1 -17   31.22   10.61   2
   2  -1 -17  132.23   12.01   2
   1  -1 -17   31.28    7.29   2
   3  -2 -17  180.85   17.27   2
  -1  -2 -17   29.29    7.37   3
   1  -3 -17   26.28    7.57   3
  -1  -4  18  115.41   21.02   1
   1   4 -18  126.57   11.60   2
   0   4 -18   43.35    9.02   2
   0  -4  18   34.74   15.94   1
  -1   4 -18   28.10   10.11   2
   1  -4  18   25.99   13.73   1
   2   3 -18  129.75   11.95   2
   1   3 -18   19.98    8.77   2
   0  -3  18   -3.30   12.89   1
   0   3 -18   -7.48    7.52   2
  -1   3 -18  125.05   12.89   2
   1  -3  18  125.66   17.37   1
  -2   3 -18    6.28    9.20   2
   2  -3  18  -15.84   12.68   1
   3   2 -18  190.98   14.56   2
   2   2 -18   -1.26    6.99   2
   1   2 -18  158.39   13.64   2
   0   2 -18   29.55    7.86   2
  -1   2 -18    5.83    7.65   2
   1  -2  18    6.52   12.55   1
  -2   2 -18   91.94   11.22   2
   2  -2  18   77.19   15.14   1
   3   1 -18   42.78    9.68   2
   2   1 -18   73.29    9.96   2
   1   1 -18    6.94    6.82   2
   0   1 -18   26.09    7.94   2
  -1   1 -18  294.55   19.37   2
   2  -1  18  108.68   17.75   1
   3   0 -18  221.14   17.80   2
   2   0 -18    4.89    7.30   2
   1   0 -18   40.33    7.83   2
   0   0 -18  161.29   13.45   2
   3  -1 -18   72.28   11.92   2
   2  -1 -18    2.36    7.95   2
   1   3 -19  141.00   13.49   2
   0   3 -19   40.73    9.75   2
  -1   3 -19  513.98   29.64   2
   1  -3  19  456.54   36.70   1
   2   2 -19   37.29    8.92   2
   1   2 -19   93.06   10.97   2
   0   2 -19    7.45    7.66   2
  -1   2 -19   97.23   11.60   2
   2   1 -19   52.72    9.89   2
   1   1 -19  289.21   19.21   2
   0   1 -19   57.51    9.39   2
  -1   1 -19  381.42   23.47   2
   2   0 -19    3.93    8.20   2
   1   0 -19  343.29   21.63   2
   0   0   0    0.00    0.00   0
;
_shelx_hkl_checksum   56651
