# Supplementary material
Source: MDPI journal article supplement (https://www.mdpi.com/2304-6740/7/10/122)
Supplement: s1 [file s1 › CoH10As4O16.cif]

data_global       

_publ_contact_author_name
  
;       
Matthias Weil       
;       
  
_publ_contact_author_address  
  
;  
Institute for Chemical Technologies and Analytics
Division of Structural Chemistry
TU Wien
Getreidemarkt 9/164-SC
A-1060 Vienna
Austria       
;  
  
_publ_contact_author_phone      '+43 1 58801 17122'
_publ_contact_author_fax        '+43 1 58801 17199'  
_publ_contact_author_email      'matthias.weil@tuwien.ac.at'
_publ_contact_letter
;
Please consider this CIF submission as supporting information
for Inorganic Chemistry.
;
_publ_requested_journal
;
data deposition
;
_publ_requested_category
;
;
_publ_requested_coeditor_name   ?
_journal_date_recd_electronic      ?
_journal_date_to_coeditor       ?
_journal_date_from_coeditor     ?       
_journal_date_accepted     ?
_journal_date_printers_first    ?       
_journal_date_printers_final    ?       
_journal_date_proofs_out        ?       
_journal_date_proofs_in ?       
_journal_coeditor_name  ?       
_journal_coeditor_code     ?
_journal_paper_category      ?
_journal_coeditor_notes   ?       
_journal_techeditor_code      ?
_iucr_compatibility_tag          ?
_journal_techeditor_notes ?       
_journal_coden_ASTM     ?       
_journal_name_full      ?       
_journal_year   ?       
_journal_volume ?       
_journal_issue  ?       
_journal_page_first     ?       
_journal_page_last      ?       
_journal_suppl_publ_number      ?       
_journal_suppl_publ_pages       ?       
  
_publ_section_title             
;   
data deposition
;
loop_       
  
 _publ_author_name       
 _publ_author_address       

'Weil, Matthias'
;  
Institute for Chemical Technologies and Analytics
Division of Structural Chemistry
TU Wien
Getreidemarkt 9/164-SC
A-1060 Vienna
Austria       
; 

_publ_section_abstract
;
;
_publ_section_comment
;
;
_publ_section_exptl_prep
;
;

_publ_section_exptl_refinement
;
;

_publ_section_references
;


;
_publ_section_acknowledgements
;
;

_publ_section_figure_captions
;
;
    

data_CoAs4H10O16
 
_audit_creation_method            'SHELXL-2018/3'
_shelx_SHELXL_version_number      '2018/3'
_chemical_name_systematic         ?
_chemical_name_common             ?
_chemical_melting_point           ?
_chemical_formula_moiety          'As4 Co H10 O16'
_chemical_formula_sum
 'As4 H10 Co O16' 
_chemical_formula_weight          624.69

loop_
 _atom_type_symbol
 _atom_type_description
 _atom_type_scat_dispersion_real
 _atom_type_scat_dispersion_imag
 _atom_type_scat_source
 'O'  'O'   0.0106   0.0060
 'International Tables Vol C Tables 4.2.6.8 and 6.1.1.4'
 'H'  'H'   0.0000   0.0000
 'International Tables Vol C Tables 4.2.6.8 and 6.1.1.4'
 'Co'  'Co'   0.3494   0.9721
 'International Tables Vol C Tables 4.2.6.8 and 6.1.1.4'
 'As'  'As'   0.0499   2.0058
 'International Tables Vol C Tables 4.2.6.8 and 6.1.1.4'
 
_space_group_crystal_system       triclinic
_space_group_IT_number            2
_space_group_name_H-M_alt         'P -1'
_space_group_name_Hall            '-P 1'
 
_shelx_space_group_comment
;
The symmetry employed for this shelxl refinement is uniquely defined
by the following loop, which should always be used as a source of
symmetry information in preference to the above space-group names.
They are only intended as comments.
;
 
loop_
 _space_group_symop_operation_xyz
 'x, y, z'
 '-x, -y, -z'
 
_cell_length_a                    5.495(3)
_cell_length_b                    7.394(4)
_cell_length_c                    8.330(5)
_cell_angle_alpha                 100.604(15)
_cell_angle_beta                  97.550(14)
_cell_angle_gamma                 92.858(12)
_cell_volume                      328.8(3)
_cell_formula_units_Z             1
_cell_measurement_temperature     296(2)
_cell_measurement_reflns_used     1663
_cell_measurement_theta_min       2.811
_cell_measurement_theta_max       33.011
 
_exptl_crystal_description        plate
_exptl_crystal_colour             violet
_exptl_crystal_density_meas       ?
_exptl_crystal_density_method     ?
_exptl_crystal_density_diffrn     3.155          
_exptl_crystal_F_000              297
_exptl_transmission_factor_min    ?
_exptl_transmission_factor_max    ?
_exptl_crystal_size_max           0.120
_exptl_crystal_size_mid           0.060
_exptl_crystal_size_min           0.010
_exptl_absorpt_coefficient_mu     11.379
_shelx_estimated_absorpt_T_min    0.342
_shelx_estimated_absorpt_T_max    0.895
_exptl_absorpt_correction_type    'multi-scan'
_exptl_absorpt_correction_T_min   0.5919  
_exptl_absorpt_correction_T_max   0.7472
_exptl_absorpt_process_details    'SADABS'
_exptl_absorpt_special_details    ?
_diffrn_ambient_temperature       296(2)
_diffrn_radiation_wavelength      0.71073
_diffrn_radiation_type            MoK\a
_diffrn_source                    ?
_diffrn_measurement_device_type   'Bruker APEX-II CCD'
_diffrn_measurement_method        '\w- and \f-scans'
_diffrn_detector_area_resol_mean  ?
_diffrn_reflns_number             4582
_diffrn_reflns_av_unetI/netI      0.0585
_diffrn_reflns_av_R_equivalents   0.0364
_diffrn_reflns_limit_h_min        -7
_diffrn_reflns_limit_h_max        7
_diffrn_reflns_limit_k_min        -10
_diffrn_reflns_limit_k_max        10
_diffrn_reflns_limit_l_min        -12
_diffrn_reflns_limit_l_max        11
_diffrn_reflns_theta_min          2.811
_diffrn_reflns_theta_max          30.999
_diffrn_reflns_theta_full         25.242
_diffrn_measured_fraction_theta_max   0.982
_diffrn_measured_fraction_theta_full  0.979
_diffrn_reflns_Laue_measured_fraction_max    0.982
_diffrn_reflns_Laue_measured_fraction_full   0.979
_diffrn_reflns_point_group_measured_fraction_max   0.982
_diffrn_reflns_point_group_measured_fraction_full  0.979
_reflns_number_total              2057
_reflns_number_gt                 1568
_reflns_threshold_expression      'I > 2\s(I)'
_reflns_Friedel_coverage          0.000
_reflns_Friedel_fraction_max      .
_reflns_Friedel_fraction_full     .
 
_reflns_special_details
;
 Reflections were merged by SHELXL according to the crystal
 class for the calculation of statistics and refinement.
 
 _reflns_Friedel_fraction is defined as the number of unique
 Friedel pairs measured divided by the number that would be
 possible theoretically, ignoring centric projections and
 systematic absences.
;
 
_computing_data_collection        'APEX-2 (Bruker, 2009)'
_computing_cell_refinement        'SAINT (Bruker, 2009)'
_computing_data_reduction         'SAINT (Bruker, 2009)'
_computing_structure_solution     'isomorphic replacement'
_computing_structure_refinement 'SHELXL-2018/3 (Sheldrick, 2018)'
_computing_molecular_graphics     ?
_computing_publication_material   ?
_refine_special_details           ?
_refine_ls_structure_factor_coef  Fsqd
_refine_ls_matrix_type            full
_refine_ls_weighting_scheme       calc
_refine_ls_weighting_details
'w=1/[\s^2^(Fo^2^)+(0.0412P)^2^] where P=(Fo^2^+2Fc^2^)/3'
_atom_sites_solution_primary      ?
_atom_sites_solution_secondary    ?
_atom_sites_solution_hydrogens    difmap
_refine_ls_hydrogen_treatment     refall
_refine_ls_extinction_method      none
_refine_ls_extinction_coef        .
_refine_ls_number_reflns          2057
_refine_ls_number_parameters      113
_refine_ls_number_restraints      5
_refine_ls_R_factor_all           0.0569
_refine_ls_R_factor_gt            0.0380
_refine_ls_wR_factor_ref          0.0850
_refine_ls_wR_factor_gt           0.0794
_refine_ls_goodness_of_fit_ref    1.037
_refine_ls_restrained_S_all       1.035
_refine_ls_shift/su_max           0.000
_refine_ls_shift/su_mean          0.000
 
loop_
 _atom_site_label
 _atom_site_type_symbol
 _atom_site_fract_x
 _atom_site_fract_y
 _atom_site_fract_z
 _atom_site_U_iso_or_equiv
 _atom_site_adp_type
 _atom_site_occupancy
 _atom_site_site_symmetry_order  
 _atom_site_calc_flag
 _atom_site_refinement_flags_posn
 _atom_site_refinement_flags_adp
 _atom_site_refinement_flags_occupancy
 _atom_site_disorder_assembly
 _atom_site_disorder_group
As1 As 0.04516(7) 0.32063(6) 0.74846(6) 0.01470(13) Uani 1 1 d . . . . .
As2 As 0.42570(7) 0.82870(6) 0.78027(6) 0.01208(12) Uani 1 1 d . . . . .
Co1 Co 0.000000 0.000000 0.000000 0.01367(19) Uani 1 2 d S . P . .
O1 O 0.8858(5) 0.5057(5) 0.7260(5) 0.0238(8) Uani 1 1 d D . . . .
O2 O 0.1024(7) 0.2308(6) 0.5538(5) 0.0310(9) Uani 1 1 d D . . . .
O3 O 0.8873(5) 0.1672(5) 0.8226(5) 0.0226(8) Uani 1 1 d . . . . .
O4 O 0.3131(6) 0.4034(5) 0.8716(5) 0.0271(9) Uani 1 1 d D . . . .
O5 O 0.6543(5) 0.8379(4) 0.9344(4) 0.0165(7) Uani 1 1 d . . . . .
O6 O 0.4361(6) 0.6424(5) 0.6265(5) 0.0262(9) Uani 1 1 d D . . . .
O7 O 0.1412(5) 0.8152(4) 0.8279(4) 0.0152(7) Uani 1 1 d . . . . .
O8 O 0.4552(5) 1.0163(5) 0.6877(5) 0.0237(8) Uani 1 1 d D . . . .
H1 H 0.213(10) 0.150(7) 0.576(10) 0.056(10) Uiso 1 1 d D U . . .
H2 H 0.958(12) 0.616(5) 0.780(9) 0.056(10) Uiso 1 1 d D U . . .
H3 H 0.332(12) 0.341(9) 0.955(6) 0.056(10) Uiso 1 1 d D U . . .
H4 H 0.572(7) 0.580(8) 0.634(10) 0.056(10) Uiso 1 1 d D U . . .
H5 H 0.614(5) 1.055(10) 0.725(10) 0.056(10) Uiso 1 1 d D U . . .
 
loop_
 _atom_site_aniso_label
 _atom_site_aniso_U_11
 _atom_site_aniso_U_22
 _atom_site_aniso_U_33
 _atom_site_aniso_U_23
 _atom_site_aniso_U_13
 _atom_site_aniso_U_12
As1 0.01404(18) 0.0119(2) 0.0176(3) 0.0042(2) -0.00048(16) -0.00202(15)
As2 0.00996(17) 0.0124(2) 0.0135(3) 0.00165(19) 0.00151(14) 0.00058(14)
Co1 0.0115(3) 0.0123(4) 0.0170(5) 0.0015(4) 0.0033(3) 0.0003(3)
O1 0.0149(13) 0.0105(17) 0.042(3) 0.0027(16) -0.0058(13) -0.0014(11)
O2 0.0389(19) 0.033(2) 0.021(2) 0.0023(19) 0.0062(16) 0.0107(16)
O3 0.0187(14) 0.0192(18) 0.030(2) 0.0117(16) -0.0018(13) -0.0072(12)
O4 0.0207(14) 0.024(2) 0.036(3) 0.0134(18) -0.0093(15) -0.0067(13)
O5 0.0119(12) 0.0174(17) 0.0191(19) 0.0046(15) -0.0023(11) -0.0028(11)
O6 0.0236(15) 0.026(2) 0.023(2) -0.0093(17) -0.0010(13) 0.0114(14)
O7 0.0107(11) 0.0140(16) 0.0196(19) -0.0026(14) 0.0058(11) 0.0005(10)
O8 0.0191(14) 0.027(2) 0.026(2) 0.0147(17) -0.0014(13) -0.0035(13)
 
_geom_special_details
;
 All esds (except the esd in the dihedral angle between two l.s. planes)
 are estimated using the full covariance matrix.  The cell esds are taken
 into account individually in the estimation of esds in distances, angles
 and torsion angles; correlations between esds in cell parameters are only
 used when they are defined by crystal symmetry.  An approximate (isotropic)
 treatment of cell esds is used for estimating esds involving l.s. planes.
;
 
loop_
 _geom_bond_atom_site_label_1
 _geom_bond_atom_site_label_2
 _geom_bond_distance
 _geom_bond_site_symmetry_2
 _geom_bond_publ_flag
As1 O3 1.650(3) 1_455 ?
As1 O1 1.687(3) 1_455 ?
As1 O4 1.696(3) . ?
As1 O2 1.711(4) . ?
As2 O5 1.663(3) . ?
As2 O7 1.665(3) . ?
As2 O6 1.709(4) . ?
As2 O8 1.717(4) . ?
Co1 O7 2.050(3) 2_566 ?
Co1 O7 2.050(3) 1_544 ?
Co1 O5 2.146(3) 2_666 ?
Co1 O5 2.146(3) 1_444 ?
Co1 O3 2.146(4) 1_454 ?
Co1 O3 2.146(4) 2_656 ?
O1 H2 0.901(10) . ?
O2 H1 0.898(10) . ?
O4 H3 0.898(10) . ?
O6 H4 0.896(10) . ?
O8 H5 0.899(10) . ?
 
loop_
 _geom_angle_atom_site_label_1
 _geom_angle_atom_site_label_2
 _geom_angle_atom_site_label_3
 _geom_angle
 _geom_angle_site_symmetry_1
 _geom_angle_site_symmetry_3
 _geom_angle_publ_flag
O3 As1 O1 112.01(17) 1_455 1_455 ?
O3 As1 O4 112.83(18) 1_455 . ?
O1 As1 O4 106.26(17) 1_455 . ?
O3 As1 O2 110.9(2) 1_455 . ?
O1 As1 O2 104.5(2) 1_455 . ?
O4 As1 O2 109.9(2) . . ?
O5 As2 O7 116.43(17) . . ?
O5 As2 O6 111.40(16) . . ?
O7 As2 O6 105.40(17) . . ?
O5 As2 O8 110.43(16) . . ?
O7 As2 O8 107.74(16) . . ?
O6 As2 O8 104.7(2) . . ?
O7 Co1 O7 180.00(12) 2_566 1_544 ?
O7 Co1 O5 88.58(12) 2_566 2_666 ?
O7 Co1 O5 91.42(12) 1_544 2_666 ?
O7 Co1 O5 91.42(12) 2_566 1_444 ?
O7 Co1 O5 88.58(12) 1_544 1_444 ?
O5 Co1 O5 180.0 2_666 1_444 ?
O7 Co1 O3 88.00(15) 2_566 1_454 ?
O7 Co1 O3 92.00(15) 1_544 1_454 ?
O5 Co1 O3 89.60(12) 2_666 1_454 ?
O5 Co1 O3 90.40(12) 1_444 1_454 ?
O7 Co1 O3 92.00(15) 2_566 2_656 ?
O7 Co1 O3 88.00(15) 1_544 2_656 ?
O5 Co1 O3 90.40(12) 2_666 2_656 ?
O5 Co1 O3 89.60(12) 1_444 2_656 ?
O3 Co1 O3 180.00(17) 1_454 2_656 ?
As1 O1 H2 116(5) 1_655 . ?
As1 O2 H1 101(6) . . ?
As1 O3 Co1 131.09(17) 1_655 1_656 ?
As1 O4 H3 108(5) . . ?
As2 O5 Co1 132.00(19) . 1_666 ?
As2 O6 H4 116(5) . . ?
As2 O7 Co1 126.05(17) . 1_566 ?
As2 O8 H5 101(5) . . ?
 
loop_
 _geom_hbond_atom_site_label_D 
 _geom_hbond_atom_site_label_H 
 _geom_hbond_atom_site_label_A 
 _geom_hbond_distance_DH 
 _geom_hbond_distance_HA 
 _geom_hbond_distance_DA 
 _geom_hbond_angle_DHA 
 _geom_hbond_site_symmetry_A 
 _geom_hbond_publ_flag
O2 H1 O8  0.898(10) 1.94(3) 2.812(5) 163(8) 1_545 yes
O1 H2 O7  0.901(10) 1.69(3) 2.564(5) 162(8) 1_655 yes
O4 H3 O5  0.898(10) 1.75(3) 2.616(5) 162(7) 2_667 yes
O6 H4 O1  0.896(10) 1.94(3) 2.799(4) 159(7) . yes
O6 H4 O6  0.896(10) 2.46(7) 2.875(7) 108(6) 2_666 yes
O8 H5 O3  0.899(10) 1.71(2) 2.592(5) 167(8) 1_565 yes
 
_refine_diff_density_max    1.290
_refine_diff_density_min   -1.196
_refine_diff_density_rms    0.237

_shelx_res_file
;
TITL test in P-1
    isotypic.res
    created by SHELXL-2018/3 at 16:20:39 on 13-Jul-2019
CELL 0.71073   5.4953   7.3938   8.3298 100.604  97.550  92.858
ZERR    1.00   0.0027   0.0035   0.0045   0.015   0.014   0.012
LATT  1
SFAC O H CO AS
UNIT 16 10 1 4
TEMP 23.000
L.S. 14
BOND
FMAP 2
PLAN 60
acta
size 0.12 0.06 0.01
rem unfoermiges hellviolettesfarbenes Plaettchen;
rem Xtals kristallisieren radialstrahlig in der sauren lsg
rem Koordinaten aufgestellt entsprechend der isotypen Cu-Vbd sowie wie Ni und Mn
omit -4 62
omit     0   0   1 !         1.01       1824.37      18.31       0.325       8.1
omit    -4   5   6 !         9.81       1103.48      10.74       0.253       0.8
omit    -3   3   4 !       566.30         28.75       9.70       0.041       1.2
omit    -3   3   2 !       255.31         12.52       9.38       0.027       1.4
omit    -3   6   7 !        42.89        775.33       6.99       0.212       0.7
omit    -2   2   6 !       474.85          0.13       6.74       0.003       1.1
omit    -1   1   7 !       455.08          0.17       6.25       0.003       1.1
omit    -5   5   7 !        -0.88        440.30       5.46       0.160       0.7
omit    -6  -1   1 !       159.89         17.10       5.21       0.031       0.9
omit    -3   6   8 !       -57.40        362.16       4.52       0.145       0.7
omit    -3   1   4 !       433.32        178.81       4.04       0.102       1.4
omit    -3   5   5 !         8.58        301.30       3.88       0.132       0.9
omit    -2   6   5 !        -2.80        229.52       3.29       0.115       0.8
omit    -2   2   1 !       241.21         85.88      10.20       0.070       2.1
omit    -5  -2   2 !       292.99         55.19       7.87       0.056       1.0
omit    -6  -1   5 !       224.08          4.16       6.70       0.016       0.8
bond $H
htab
dfix 0.90 0.01 O1 H2
dfix 0.90 0.01 O6 H4
dfix 0.90 0.01 O2 H1
dfix 0.90 0.01 O4 H3
dfix 0.90 0.01 O8 H5
EQIV $15 x, y-1, z
HTAB O2 O8_$15
EQIV $2 x+1, y, z
HTAB O1 O7_$2
EQIV $16 -x+1, -y+1, -z+2
HTAB O4 O5_$16
HTAB O6 O1
EQIV $7 -x+1, -y+1, -z+1
HTAB O6 O6_$7
EQIV $17 x, y+1, z
HTAB O8 O3_$17
acta
WGHT    0.041200
FVAR       0.23926   0.05607
AS1   4    0.045161    0.320625    0.748455    11.00000    0.01404    0.01194 =
         0.01760    0.00425   -0.00048   -0.00202
AS2   4    0.425695    0.828702    0.780267    11.00000    0.00996    0.01239 =
         0.01351    0.00165    0.00151    0.00058
CO1   3    0.000000    0.000000    0.000000    10.50000    0.01149    0.01230 =
         0.01697    0.00145    0.00328    0.00026
O1    1    0.885786    0.505730    0.726008    11.00000    0.01492    0.01046 =
         0.04226    0.00271   -0.00583   -0.00142
O2    1    0.102437    0.230833    0.553787    11.00000    0.03886    0.03326 =
         0.02097    0.00233    0.00622    0.01069
O3    1    0.887284    0.167233    0.822603    11.00000    0.01868    0.01921 =
         0.03019    0.01168   -0.00177   -0.00717
O4    1    0.313082    0.403364    0.871647    11.00000    0.02067    0.02360 =
         0.03563    0.01344   -0.00935   -0.00667
O5    1    0.654254    0.837905    0.934366    11.00000    0.01186    0.01743 =
         0.01910    0.00459   -0.00231   -0.00278
O6    1    0.436096    0.642355    0.626475    11.00000    0.02357    0.02650 =
         0.02303   -0.00934   -0.00096    0.01140
O7    1    0.141187    0.815159    0.827879    11.00000    0.01067    0.01396 =
         0.01960   -0.00265    0.00579    0.00048
O8    1    0.455203    1.016255    0.687740    11.00000    0.01910    0.02737 =
         0.02646    0.01467   -0.00143   -0.00353
H1    2    0.212691    0.149838    0.575664    11.00000   21.00000
H2    2    0.957939    0.616151    0.779828    11.00000   21.00000
H3    2    0.331871    0.341062    0.954858    11.00000   21.00000
H4    2    0.571842    0.580485    0.633977    11.00000   21.00000
H5    2    0.613694    1.055462    0.724769    11.00000   21.00000
HKLF 4


REM  test in P-1
REM wR2 = 0.0850, GooF = S = 1.037, Restrained GooF = 1.035 for all data
REM R1 = 0.0380 for 1568 Fo > 4sig(Fo) and 0.0569 for all 2057 data
REM 113 parameters refined using 5 restraints

END

WGHT      0.0412      0.0000

REM Instructions for potential hydrogen bonds
HTAB O2 O8_$15
HTAB O1 O7_$2
HTAB O4 O5_$16
HTAB O6 O1
HTAB O8 O3_$17

REM Highest difference peak  1.290,  deepest hole -1.196,  1-sigma level  0.237
Q1    1   0.3929  0.8148  0.8706  11.00000  0.05    1.29
Q2    1   0.0743  0.3452  0.6646  11.00000  0.05    1.20
Q3    1   1.0737  0.1233  0.8774  11.00000  0.05    1.09
Q4    1   0.8439  0.2416  0.7587  11.00000  0.05    1.07
Q5    1  -0.0312  0.3763  0.7567  11.00000  0.05    1.07
Q6    1   0.4294  0.8424  0.6880  11.00000  0.05    1.03
Q7    1   0.4918  0.7837  0.7864  11.00000  0.05    0.98
Q8    1   0.0326  0.3116  0.8443  11.00000  0.05    0.97
Q9    1   0.9969  0.2598  0.8265  11.00000  0.05    0.93
Q10   1   0.1160  0.1003  0.4734  11.00000  0.05    0.89
Q11   1   0.1030  0.7049  0.8152  11.00000  0.05    0.84
Q12   1   0.5236  0.5942  0.6757  11.00000  0.05    0.77
Q13   1   0.0670  0.2456  0.6267  11.00000  0.05    0.76
Q14   1   0.5355  0.7637  0.8391  11.00000  0.05    0.76
Q15   1   0.1713  0.2047  0.5567  11.00000  0.05    0.76
Q16   1   0.0185 -0.0240  0.1027  11.00000  0.05    0.75
Q17   1   0.6096  1.2673  0.6834  11.00000  0.05    0.75
Q18   1   0.5703  0.9003  0.7390  11.00000  0.05    0.75
Q19   1   0.5687  0.9972  0.8009  11.00000  0.05    0.73
Q20   1   0.0414  0.0367 -0.0861  11.00000  0.05    0.73
Q21   1  -0.0078  0.0518  0.5447  11.00000  0.05    0.72
Q22   1   0.6845  1.0923  0.7786  11.00000  0.05    0.68
Q23   1   0.3126  0.0439  0.5807  11.00000  0.05    0.67
Q24   1   0.2957  0.8555  0.7913  11.00000  0.05    0.67
Q25   1   0.3859  0.4003  0.9667  11.00000  0.05    0.66
Q26   1   0.7558  0.4151  0.8404  11.00000  0.05    0.65
Q27   1   0.4663  1.0456  0.6064  11.00000  0.05    0.65
Q28   1   0.7533  0.1495  0.7965  11.00000  0.05    0.64
Q29   1   0.5480  0.5496  0.4800  11.00000  0.05    0.64
Q30   1  -0.0063  0.1405  0.3777  11.00000  0.05    0.63
Q31   1   0.2982  0.6768  0.7795  11.00000  0.05    0.63
Q32   1   0.5275  1.1240  0.8331  11.00000  0.05    0.62
Q33   1   0.4919  0.8300  1.0758  11.00000  0.05    0.62
Q34   1   0.3766  0.7270  0.5805  11.00000  0.05    0.62
Q35   1   0.2352  0.4817  0.6417  11.00000  0.05    0.62
Q36   1   0.2093  0.4657  0.7975  11.00000  0.05    0.62
Q37   1   0.5577  0.9427  0.6651  11.00000  0.05    0.61
Q38   1   0.4883  0.9363  0.5833  11.00000  0.05    0.61
Q39   1   0.8109  0.6713  0.6016  11.00000  0.05    0.60
Q40   1   0.0343  0.2940  0.5598  11.00000  0.05    0.60
Q41   1   0.8567  0.2005  0.9062  11.00000  0.05    0.59
Q42   1  -0.0307  0.1972  0.6171  11.00000  0.05    0.59
Q43   1   0.4877  0.6445  0.5070  11.00000  0.05    0.59
Q44   1   0.8280  0.8036  0.9732  11.00000  0.05    0.57
Q45   1   0.8547  0.5624  0.6052  11.00000  0.05    0.57
Q46   1   0.4919  0.7147  0.6025  11.00000  0.05    0.57
Q47   1   0.4777  1.0945  0.8232  11.00000  0.05    0.57
Q48   1   0.9046  0.1604  0.7141  11.00000  0.05    0.57
Q49   1   0.3060  0.5226  0.9651  11.00000  0.05    0.56
Q50   1   0.3720  0.8273  0.5923  11.00000  0.05    0.56
Q51   1   0.1192  0.8358  0.9729  11.00000  0.05    0.56
Q52   1   1.0665  0.5413  0.9004  11.00000  0.05    0.56
Q53   1   1.0654  0.7033  0.9348  11.00000  0.05    0.56
Q54   1   1.1459  0.5779  0.6524  11.00000  0.05    0.56
Q55   1   0.1987  0.4108  0.9032  11.00000  0.05    0.55
Q56   1   0.4010  0.9949  0.8615  11.00000  0.05    0.55
Q57   1   0.2148  0.3164  0.4884  11.00000  0.05    0.54
Q58   1   0.2433  0.2275  0.4451  11.00000  0.05    0.54
Q59   1   0.2560  0.3244  0.9580  11.00000  0.05    0.54
Q60   1   0.9321  0.2151  0.8854  11.00000  0.05    0.54
;
_shelx_res_checksum   92435

_shelx_hkl_file
;
  -1   0   0   52.09    1.34
  -1   0   0   52.18    1.23
  -1   0   0   53.14    1.13
   1   0   0   52.25    1.32
  -2   0   0  649.46   11.19
  -2   0   0  683.40    9.71
  -2   0   0  662.12   10.38
  -3   0   0   44.33    1.77
  -3   0   0   42.97    1.81
  -3   0   0   43.66    1.60
  -4   0   0   -0.02    0.81
  -4   0   0    1.47    0.73
  -4   0   0    1.32    0.88
  -5   0   0   32.68    2.28
  -5   0   0   27.99    2.03
  -5   0   0   32.43    1.87
  -6   0   0   15.22    1.65
  -6   0   0   16.57    1.92
  -6   0   0   14.83    1.81
  -7   0   0   30.18    2.60
  -7   0   0   35.17    2.54
  -8   0   0   14.13    2.11
  -9   0   0    2.55    1.84
  -9   1   0   31.35    3.00
  -8   1   0    1.14    1.54
  -7   1   0   76.63    3.65
  -7   1   0   74.57    3.42
  -7   1   0   79.78    3.94
   6  -1   0   64.30    3.50
  -6   1   0   59.24    2.99
  -6   1   0   57.11    2.69
  -6   1   0   60.15    3.23
   5  -1   0   39.33    2.66
  -5   1   0   34.86    2.18
  -5   1   0   34.73    2.02
  -5   1   0   39.91    2.27
  -4   1   0  332.02    6.15
  -4   1   0  326.70    6.90
  -4   1   0  322.47    6.44
  -3   1   0   26.15    1.53
  -3   1   0   27.76    1.36
  -3   1   0   26.16    1.44
  -2   1   0  253.10    4.51
  -2   1   0  261.93    4.30
  -2   1   0  252.52    4.83
   1  -1   0   76.40    1.67
  -1   1   0   76.82    1.47
  -1   1   0   74.90    1.65
  -1   1   0   78.14    1.56
   0  -1   0   48.37    1.22
   0  -1   0   40.34    1.79
  -1  -1   0   51.02    2.11
  -1  -1   0   48.20    1.39
  -1  -1   0   50.46    1.10
  -1  -1   0   48.71    1.23
   1   1   0   50.40    1.98
  -2  -1   0   21.27    1.05
  -2  -1   0   23.86    1.16
  -2  -1   0   22.25    1.23
  -3  -1   0    8.51    0.86
  -3  -1   0    6.68    0.95
  -3  -1   0    7.67    0.95
  -4  -1   0  279.55    5.33
  -4  -1   0  267.95    5.71
  -4  -1   0  269.80    6.27
  -5  -1   0   15.96    1.48
  -5  -1   0   13.98    1.58
  -5  -1   0   14.26    1.69
  -6  -1   0   59.69    2.67
  -6  -1   0   55.76    3.06
  -6  -1   0   57.26    3.01
  -7  -1   0    0.28    1.17
  -7  -1   0   -0.21    1.45
  -8  -1   0   -0.62    1.42
  -9  -1   0    0.51    1.75
  -9   2   0    7.28    2.01
  -8   2   0   -0.53    1.49
   7  -2   0    1.34    1.58
  -7   2   0    4.51    1.65
  -7   2   0    2.80    1.52
  -7   2   0    3.29    1.40
   6  -2   0   14.62    2.07
  -6   2   0   16.22    1.75
  -6   2   0   13.26    1.73
  -6   2   0   16.18    1.93
   5  -2   0   79.86    3.73
  -5   2   0   75.12    2.79
  -5   2   0   75.52    2.94
  -5   2   0   75.78    3.09
  -4   2   0   18.84    1.51
  -4   2   0   16.33    1.45
  -4   2   0   16.47    1.32
  -3   2   0  164.32    3.56
  -3   2   0  155.14    3.38
  -3   2   0  161.14    3.75
   2  -2   0   46.97    2.73
  -2   2   0   46.74    1.47
  -2   2   0   45.19    1.54
  -2   2   0   48.39    1.50
   1  -2   0  120.93    3.32
   1  -2   0  128.37    4.31
  -1   2   0  122.57    3.71
  -1   2   0  119.37    2.14
  -1   2   0  122.36    2.17
   0  -2   0  141.35    4.84
   0  -2   0  149.71    3.47
   0   2   0  151.98    4.37
  -1  -2   0   94.78    1.90
  -1  -2   0   98.39    3.84
  -1  -2   0   91.74    1.67
   1   2   0   91.66    3.35
  -2  -2   0    2.29    0.61
  -2  -2   0    3.66    1.49
  -2  -2   0    2.97    0.54
   2   2   0    3.27    1.16
  -3  -2   0  194.53    3.73
  -3  -2   0  173.15    4.38
  -3  -2   0  182.57    4.04
   3   2   0  194.88    5.71
  -4  -2   0   19.32    1.63
  -4  -2   0   20.68    1.72
  -4  -2   0   21.61    1.46
  -5  -2   0   56.76    2.70
  -5  -2   0   56.54    2.43
  -6  -2   0   38.64    2.55
  -6  -2   0   39.57    2.36
  -7  -2   0    2.62    1.61
  -7  -2   0    5.56    1.52
  -8  -2   0   51.65    3.22
  -9  -2   0    0.42    1.80
  -9   3   0    9.54    2.19
  -8   3   0    0.60    1.55
   7  -3   0   24.15    2.84
  -7   3   0   21.03    2.36
  -7   3   0   16.57    1.99
  -7   3   0   20.02    2.17
   6  -3   0   17.45    2.40
  -6   3   0   17.70    1.92
  -6   3   0   17.58    1.80
  -6   3   0   20.12    1.96
   5  -3   0    0.51    1.33
  -5   3   0    1.80    1.01
  -5   3   0   -0.10    0.90
  -5   3   0    2.16    1.11
   4  -3   0  131.39    4.81
  -4   3   0  130.09    3.69
  -4   3   0  134.95    3.50
  -4   3   0  128.82    3.36
   3  -3   0   95.81    4.47
   3  -3   0  100.41    3.81
  -3   3   0   99.10    2.55
  -3   3   0   96.35    2.67
  -3   3   0   93.48    2.49
   2  -3   0   29.96    2.02
   2  -3   0   30.80    2.68
  -2   3   0   31.43    1.22
  -2   3   0   33.28    1.23
  -2   3   0   31.37    1.33
  -2   3   0   26.77    1.96
   1  -3   0  337.69    7.67
   1  -3   0  338.75    9.64
  -1   3   0  341.59    8.76
  -1   3   0  343.64    5.07
   0  -3   0    3.37    1.99
   0  -3   0    1.47    0.64
   0   3   0    2.16    1.18
  -1  -3   0  226.03    7.53
  -1  -3   0  244.88    4.02
  -1  -3   0  238.20    5.26
   1   3   0  248.98    6.99
  -2  -3   0  175.42    3.08
  -2  -3   0  169.05    3.41
  -2  -3   0  162.87    6.04
   2   3   0  166.85    5.63
  -3  -3   0  184.13    4.15
  -3  -3   0  192.35    3.75
   3   3   0  198.22    6.37
  -4  -3   0  210.94    4.40
  -4  -3   0  208.85    4.88
   4   3   0  200.47    6.87
  -5  -3   0    5.64    1.22
  -5  -3   0    5.26    1.14
   5   3   0    6.23    2.08
  -6  -3   0   55.88    2.72
  -6  -3   0   56.33    3.03
  -7  -3   0   14.55    2.16
  -7  -3   0   13.48    1.84
  -8  -3   0    1.97    1.59
   8  -4   0   58.48    4.42
  -8   4   0   55.85    3.45
   7  -4   0    5.76    2.19
  -7   4   0    4.46    1.71
  -7   4   0    3.83    1.50
   6  -4   0   30.92    3.15
  -6   4   0   30.76    2.22
  -6   4   0   27.36    2.26
  -6   4   0   29.72    2.34
   5  -4   0   81.31    4.24
  -5   4   0   81.38    2.93
  -5   4   0   85.41    3.21
  -5   4   0   79.81    3.04
   4  -4   0    0.53    1.17
   4  -4   0    1.95    2.45
  -4   4   0    0.80    0.81
  -4   4   0    1.21    0.84
  -4   4   0    1.50    0.88
   3  -4   0  211.21    6.49
   3  -4   0  238.29    8.05
  -3   4   0  228.61    4.44
  -3   4   0  226.06    4.80
  -3   4   0  222.58    4.34
   2  -4   0   10.73    2.49
   2  -4   0   12.25    1.50
  -2   4   0   10.92    0.86
  -2   4   0   12.64    0.97
  -2   4   0   14.34    0.96
  -2   4   0   14.46    1.75
   1  -4   0  225.46    5.90
   1  -4   0  225.58    7.99
  -1   4   0  236.82    3.67
  -1   4   0  239.33    6.99
   0  -4   0    6.63    1.03
   0  -4   0    7.94    2.47
   0   4   0    6.32    0.38
   0   4   0    6.90    1.63
  -1  -4   0    3.15    0.77
  -1  -4   0    3.06    2.34
   1   4   0    4.61    1.56
  -2  -4   0   -0.15    2.22
  -2  -4   0   -0.40    0.54
   2   4   0   -0.70    1.32
  -3  -4   0  206.36    7.65
  -3  -4   0  211.31    4.52
  -3  -4   0  214.30    4.04
   3   4   0  209.06    7.18
  -4  -4   0   16.24    1.51
  -4  -4   0   17.50    1.31
   4   4   0   21.39    2.84
  -5  -4   0   91.46    3.00
  -5  -4   0   94.09    3.56
   5   4   0   93.55    5.11
  -6  -4   0    1.07    1.17
  -6  -4   0    0.74    1.40
   6   4   0    0.42    2.22
  -7  -4   0    3.84    1.51
   8  -5   0    0.12    2.12
  -8   5   0    0.69    1.51
   7  -5   0   12.69    2.68
  -7   5   0    9.90    1.74
   6  -5   0   31.40    3.33
  -6   5   0   28.31    2.15
  -6   5   0   30.87    2.44
   5  -5   0   23.98    2.60
   5  -5   0   22.88    4.04
  -5   5   0   23.07    1.98
  -5   5   0   23.04    1.75
   4  -5   0  137.89    6.60
   4  -5   0  112.45    5.00
  -4   5   0  128.25    3.32
  -4   5   0  128.85    3.58
  -4   5   0  122.00    3.31
   3  -5   0   13.34    1.81
   3  -5   0    9.18    3.15
  -3   5   0   13.80    1.23
  -3   5   0   11.05    1.04
   2  -5   0   20.25    1.91
   2  -5   0   15.26    3.20
  -2   5   0   23.17    1.12
  -2   5   0   23.39    1.24
  -2   5   0   21.97    2.56
   1  -5   0   42.48    4.23
   1  -5   0   40.93    2.42
  -1   5   0   39.59    3.18
  -1   5   0   41.63    1.13
   0  -5   0   40.75    2.24
   0  -5   0   45.33    4.36
   0   5   0   44.80    3.31
  -1  -5   0  161.41    4.60
  -1  -5   0  184.93    7.79
   1   5   0  167.28    6.41
  -2  -5   0   30.23    4.22
   2   5   0   37.58    3.37
  -3  -5   0   40.46    4.70
  -3  -5   0   43.91    1.95
   3   5   0   41.86    3.79
  -4  -5   0   63.89    2.69
  -4  -5   0   60.98    2.24
   4   5   0   63.03    4.58
  -5  -5   0    5.72    1.38
   5   5   0    6.02    2.65
   6   5   0   36.10    4.20
   8  -6   0   11.46    3.02
  -8   6   0   11.74    2.10
   7  -6   0    7.01    2.51
  -7   6   0    9.99    1.77
   6  -6   0   17.79    2.90
  -6   6   0   18.31    1.83
   5  -6   0   13.55    4.25
   5  -6   0    7.04    2.11
  -5   6   0   10.68    1.36
   4  -6   0   -0.59    1.29
  -4   6   0   -0.12    0.81
  -4   6   0   -0.11    0.85
   3  -6   0    0.60    1.35
   3  -6   0   -1.79    2.95
  -3   6   0    0.26    0.67
  -3   6   0   -0.84    0.67
   2  -6   0  144.36    5.32
  -2   6   0  150.16    6.02
  -2   6   0  159.47    3.49
  -2   6   0  155.05    3.04
   1  -6   0    0.75    2.82
   1  -6   0    0.40    1.09
  -1   6   0   -0.08    1.68
  -1   6   0    0.55    0.40
   0  -6   0  456.35   10.66
   0   6   0  465.15   13.15
  -1  -6   0   15.27    4.12
  -1  -6   0   30.48    2.10
   1   6   0   24.42    3.18
  -2  -6   0  207.61    9.14
   2   6   0  204.12    7.99
   3   6   0   52.86    4.41
   4   6   0    2.84    2.58
   5   6   0   43.92    4.64
   6   6   0    1.06    2.70
   7   6   0   19.05    3.69
   8  -7   0   -0.21    2.59
  -8   7   0   -1.92    1.39
   7  -7   0   26.37    3.69
  -7   7   0   22.63    2.21
   6  -7   0   29.19    3.58
   6  -7   0   28.23    5.44
  -6   7   0   37.51    2.37
   5  -7   0   18.09    2.88
   5  -7   0   14.42    4.82
  -5   7   0   18.11    1.70
   4  -7   0  114.92    5.56
   4  -7   0  122.54    7.65
  -4   7   0  116.64    3.25
   3  -7   0    0.63    1.56
   3  -7   0    0.95    3.59
   2  -7   0   74.70    6.45
   2  -7   0   83.51    4.12
  -2   7   0   81.57    4.76
   1  -7   0    6.54    1.61
   1  -7   0    4.45    3.89
  -1   7   0    5.86    2.47
   0  -7   0    9.01    4.24
   0  -7   0   20.74    2.19
   0   7   0   22.63    3.27
  -1  -7   0    2.32    1.25
  -1  -7   0    0.58    3.88
   1   7   0    3.43    2.46
  -2  -7   0    7.22    4.17
   2   7   0   10.29    3.02
   3   7   0   18.98    3.69
   4   7   0   35.21    4.38
   5   7   0   -0.64    2.65
   6   7   0   22.57    4.09
   7  -8   0    1.01    2.50
   6  -8   0    4.04    4.91
   6  -8   0    9.81    2.72
   5  -8   0   16.92    2.99
   5  -8   0   22.60    5.78
   4  -8   0    4.45    2.13
   4  -8   0    6.53    4.73
   3  -8   0   31.72    3.32
   3  -8   0   39.54    6.06
   2  -8   0   13.94    2.28
   2  -8   0   17.50    5.08
  -2   8   0   19.30    3.23
   1  -8   0    2.65    4.40
   1  -8   0    5.13    1.69
  -1   8   0    4.08    2.59
   0  -8   0   19.72    5.41
   0  -8   0   38.12    2.88
   0   8   0   36.82    4.27
  -1  -8   0    6.48    4.55
  -2  -8   0    3.56    4.57
   2   8   0   11.26    3.51
   3   8   0   23.01    4.41
   4   8   0   -1.27    2.93
   5   8   0   10.17    3.60
   6   8   0   12.81    3.91
   7  -9   0   11.07    3.50
   6  -9   0    2.98    5.43
   6  -9   0    1.73    2.65
   5  -9   0    2.66    5.27
   5  -9   0    3.18    2.55
   4  -9   0    5.05    5.00
   4  -9   0    5.52    2.45
   3  -9   0   11.98    2.58
   3  -9   0   14.43    5.44
   2  -9   0    0.54    4.53
   2  -9   0    3.64    1.89
   1  -9   0   74.13    4.34
   1  -9   0   72.85    7.48
  -1   9   0   77.00    5.73
   0  -9   0    2.77    1.75
   0  -9   0    1.30    4.98
   0   9   0    1.60    2.96
   1   9   0   68.57    5.87
   2   9   0   17.76    4.40
   3   9   0   21.00    4.61
   4   9   0   60.94    5.97
   5   9   0    7.55    3.76
   6 -10   0    2.31    2.98
   5 -10   0   27.27    4.02
   5 -10   0   19.97    6.34
   4 -10   0    0.98    2.36
   4 -10   0    2.70    4.89
   3 -10   0   63.49    4.76
   3 -10   0   38.24    7.10
   2 -10   0   -1.83    4.87
   2 -10   0    0.93    1.92
   1 -10   0   50.90    4.06
  -1  10   0   51.66    5.36
   0 -10   0   -5.04    4.91
   0  10   0    3.94    3.44
  -1 -10   0   -2.40    5.04
   1  10   0    0.14    3.50
   2  10   0    3.59    4.21
   3  10   0   24.25    5.40
   4  10   0    3.04    4.03
   5 -11   0   11.49    3.59
   4 -11   0   11.47    3.23
   3 -11   0   -1.96    4.74
   3 -11   0    1.71    2.36
   2 -11   0    2.53    2.32
   2 -11   0    1.39    5.70
   1 -11   0    0.79    5.69
   0 -11   0   -0.72    5.68
   0  11   0    3.52    3.85
   1  11   0   22.53    5.44
   2  11   0    5.45    4.47
   3 -12   0    2.01    2.54
   0 -12   1    4.07    6.23
   2 -12   1    5.97    2.67
   3 -12   1   22.94    3.79
   2  11  -1    7.44    4.57
   1  11  -1   18.43    4.99
   0  11  -1    0.41    3.50
   0 -11   1   -0.15    5.53
   1 -11   1   23.72    3.35
   1 -11   1    1.90    5.77
   2 -11   1    7.63    2.55
   2 -11   1    1.48    5.58
   3 -11   1    1.43    2.41
   3 -11   1   -1.17    4.43
   4 -11   1   18.44    3.66
   5 -11   1    2.80    3.01
   4  10  -1   -1.30    3.37
   3  10  -1   -0.82    3.58
   2  10  -1   23.55    4.98
   1  10  -1    2.32    3.45
  -1 -10   1   -2.55    5.34
   0  10  -1   49.76    5.31
   0 -10   1   45.92    4.05
  -1  10  -1    5.60    3.39
   1 -10   1    7.57    5.79
   1 -10   1    4.10    2.07
   2 -10   1    5.83    5.32
   2 -10   1    9.28    2.43
   3 -10   1   -3.94    4.41
   3 -10   1    2.17    2.25
   4 -10   1    0.08    4.52
   4 -10   1    3.99    2.59
   5 -10   1   -0.43    4.86
   5 -10   1   -0.43    2.52
   6 -10   1   16.72    3.93
   5   9  -1    1.58    3.20
   4   9  -1    6.53    3.84
   3   9  -1   20.43    4.59
   2   9  -1    7.99    3.74
   1   9  -1   44.52    5.07
   0   9  -1    2.70    2.98
   0  -9   1    1.83    5.04
   0  -9   1    2.79    1.70
  -1   9  -1   37.16    4.47
   1  -9   1   37.08    3.29
   2  -9   1   75.66    4.64
   3  -9   1    7.70    4.89
   3  -9   1   13.88    2.52
   4  -9   1   78.93    5.26
   5  -9   1   -7.91    4.44
   5  -9   1    1.74    2.23
   6  -9   1   12.12    3.28
   6  -9   1   13.61    5.84
   7  -9   1    1.43    2.83
   6   8  -1    1.91    2.89
   5   8  -1   85.34    6.32
   4   8  -1    7.22    3.31
   3   8  -1  111.13    6.75
   2   8  -1   38.62    4.53
  -2  -8   1   28.12    6.10
   1   8  -1   23.95    3.94
  -1  -8   1   17.20    5.29
   0   8  -1   30.68    4.03
   0  -8   1   14.86    5.09
   0  -8   1   23.11    2.52
  -1   8  -1    2.85    2.36
   1  -8   1    2.96    4.39
   1  -8   1    3.53    1.62
  -2   8  -1   22.30    3.40
   2  -8   1   22.17    2.60
   2  -8   1   11.43    4.76
   3  -8   1   19.53    2.72
   3  -8   1   11.44    4.78
   4  -8   1   13.11    5.07
   4  -8   1    7.76    2.42
   5  -8   1    5.92    4.84
   5  -8   1    4.17    2.35
   6  -8   1    0.11    4.75
   6  -8   1    2.66    2.48
   7  -8   1    0.96    2.49
   7   7  -1   26.82    4.18
   6   7  -1   -0.14    2.71
   5   7  -1    7.25    3.13
   4   7  -1    6.87    2.92
   3   7  -1    5.50    2.66
   2   7  -1    1.21    2.13
  -2  -7   1    4.63    4.17
   1   7  -1   92.01    5.46
  -1  -7   1   95.06    3.98
   0   7  -1   24.83    3.43
   0  -7   1   16.99    4.68
   0  -7   1   23.58    2.29
  -1   7  -1   80.57    4.85
   1  -7   1   80.18    6.52
   1  -7   1   84.91    3.99
  -2   7  -1    0.20    1.85
  -2   7  -1    0.64    0.61
   2  -7   1   -0.26    1.35
   2  -7   1   -1.16    3.25
  -3   7  -1    1.82    1.03
  -3   7  -1    1.82    0.84
   3  -7   1    1.99    1.62
   3  -7   1   -2.69    3.33
  -4   7  -1    8.55    1.24
   4  -7   1    8.64    2.04
   4  -7   1    9.31    4.33
  -5   7  -1   16.20    1.64
   5  -7   1   11.36    4.52
   5  -7   1   16.61    2.81
  -6   7  -1    2.38    1.28
   6  -7   1    2.52    4.09
   6  -7   1   -0.07    2.09
  -7   7  -1   28.70    2.44
   7  -7   1   26.56    3.84
  -8   7  -1   -0.40    1.56
   8  -7   1    0.32    2.63
   7   6  -1   -0.02    2.38
   6   6  -1    5.81    2.85
   5   6  -1   32.52    3.96
  -5  -6   1   28.94    2.28
   4   6  -1   14.11    3.06
  -4  -6   1   11.52    1.46
   3   6  -1   34.04    3.83
  -3  -6   1   47.36    2.03
   2   6  -1  110.44    5.63
  -2  -6   1  125.08    7.15
  -2  -6   1  111.93    2.65
   1   6  -1    3.89    1.93
  -1  -6   1    4.80    3.49
  -1  -6   1    2.05    1.19
   0   6  -1  102.36    5.27
   0  -6   1  106.70    4.07
   0  -6   1  120.23    6.89
  -1   6  -1   84.64    1.91
  -1   6  -1   79.51    4.50
   1  -6   1   82.97    5.88
   1  -6   1   85.25    3.72
  -2   6  -1    7.22    0.78
  -2   6  -1    6.66    2.04
   2  -6   1    3.41    3.15
   2  -6   1    5.45    1.54
  -3   6  -1  180.71    3.93
  -3   6  -1  193.57    4.63
   3  -6   1  188.00    8.51
   3  -6   1  182.18    6.33
  -4   6  -1    2.57    0.98
  -4   6  -1    3.89    1.13
   4  -6   1    2.67    1.62
   4  -6   1    4.78    3.69
  -5   6  -1  146.06    4.19
  -5   6  -1  153.17    4.57
   5  -6   1  145.52    6.21
  -6   6  -1    5.16    1.44
   6  -6   1    7.11    2.32
  -7   6  -1   21.34    2.24
   7  -6   1   24.27    3.42
  -8   6  -1   16.64    2.37
   8  -6   1   14.51    3.42
  -7  -5   1   -1.46    1.46
   6   5  -1  104.33    5.54
  -6  -5   1  102.48    4.15
   5   5  -1    0.57    2.13
  -5  -5   1   -1.57    1.00
   4   5  -1  203.76    7.63
  -4  -5   1  196.65    4.87
   3   5  -1   33.71    3.45
  -3  -5   1   32.76    1.76
  -3  -5   1   34.77    4.12
   2   5  -1   79.44    4.40
  -2  -5   1   83.75    5.52
  -2  -5   1   82.65    2.23
   1   5  -1  183.65    6.67
  -1  -5   1  179.41    7.76
  -1  -5   1  200.65    3.33
  -1  -5   1  190.27    5.22
   0   5  -1    8.86    1.98
   0  -5   1    9.75    2.96
   0  -5   1    7.69    1.24
  -1   5  -1  356.33    9.89
  -1   5  -1  345.40    5.34
   1  -5   1  341.45    8.46
   1  -5   1  329.21   11.01
  -2   5  -1   16.71    1.10
  -2   5  -1   22.26    2.30
   2  -5   1   17.02    1.81
  -3   5  -1   77.38    2.39
  -3   5  -1   79.94    2.70
   3  -5   1   78.39    3.74
   3  -5   1   82.21    5.32
  -4   5  -1   28.40    1.97
  -4   5  -1   28.09    1.73
   4  -5   1   26.58    2.76
   4  -5   1   29.34    4.25
  -5   5  -1   10.98    1.42
  -5   5  -1   11.33    1.51
   5  -5   1    4.10    3.15
   5  -5   1   10.63    2.15
  -6   5  -1    0.45    1.18
  -6   5  -1    0.70    1.30
   6  -5   1   -0.15    1.64
  -7   5  -1   30.40    2.53
  -7   5  -1   24.64    2.52
   7  -5   1   24.81    3.20
  -8   5  -1    7.57    1.95
   8  -5   1    5.14    2.61
  -7  -4   1    0.69    1.63
  -7  -4   1    0.46    1.40
  -6  -4   1   51.52    2.67
  -6  -4   1   48.80    2.96
   5   4  -1   -0.03    1.84
  -5  -4   1    1.54    1.03
  -5  -4   1    1.01    1.14
   4   4  -1   23.71    2.83
  -4  -4   1   20.88    1.64
  -4  -4   1   20.15    1.57
   3   4  -1   10.63    2.09
  -3  -4   1    4.00    2.25
   2   4  -1  149.99    5.59
  -2  -4   1  153.81    6.28
  -2  -4   1  156.90    3.25
   1   4  -1   27.92    2.55
  -1  -4   1   29.68    1.82
  -1  -4   1   30.01    1.05
  -1  -4   1   28.01    3.44
   0   4  -1  440.48   11.50
   0  -4   1  441.20   12.40
   0  -4   1  439.37    9.66
  -1   4  -1   -1.04    1.06
   1  -4   1    0.16    0.81
   1  -4   1    0.72    1.92
  -2   4  -1   33.42    2.35
  -2   4  -1   31.76    1.30
   2  -4   1   29.82    2.07
   2  -4   1   33.84    3.38
  -3   4  -1    7.09    0.88
  -3   4  -1    7.31    1.07
   3  -4   1    7.83    2.66
   3  -4   1    3.42    1.26
  -4   4  -1    5.69    1.04
  -4   4  -1    4.65    1.08
   4  -4   1    7.85    1.51
   4  -4   1    7.14    2.77
  -5   4  -1   11.23    1.34
  -5   4  -1   12.15    1.56
   5  -4   1   11.03    1.99
  -6   4  -1   28.84    2.48
  -6   4  -1   26.81    2.15
   6  -4   1   27.38    2.98
  -7   4  -1    3.60    1.54
  -7   4  -1    4.78    1.73
   7  -4   1    3.15    1.96
  -8   4  -1   22.16    2.79
  -8   4  -1   13.98    2.24
  -9  -3   1   14.63    2.46
  -8  -3   1    5.84    1.81
  -8  -3   1    5.59    2.00
  -7  -3   1   17.58    2.28
  -7  -3   1   18.20    2.01
  -6  -3   1    8.66    1.62
  -6  -3   1    9.63    1.49
  -5  -3   1    0.00    1.08
  -5  -3   1    0.08    0.91
   4   3  -1  101.73    4.39
  -4  -3   1  102.67    3.18
  -4  -3   1  104.82    2.90
   3   3  -1    9.25    1.73
  -3  -3   1    8.93    0.90
  -3  -3   1    7.77    0.98
   2   3  -1   73.22    3.36
  -2  -3   1   68.37    1.96
  -2  -3   1   74.57    3.81
   1   3  -1   74.57    3.32
  -1  -3   1   77.54    4.02
  -1  -3   1   77.64    1.73
   0   3  -1    6.61    1.41
   0  -3   1    6.01    1.81
   0  -3   1    5.91    0.91
  -1   3  -1  349.37    8.91
   1  -3   1  354.21    9.68
   1  -3   1  347.39    7.82
  -2   3  -1  317.49    8.16
  -2   3  -1  327.16    5.38
  -2   3  -1  334.62    6.25
   2  -3   1  322.64    9.19
   2  -3   1  326.78    7.72
  -3   3  -1   55.97    1.93
  -3   3  -1   52.26    1.82
  -3   3  -1   58.26    2.18
   3  -3   1   61.36    3.59
   3  -3   1   50.84    2.59
  -4   3  -1  384.69    7.23
  -4   3  -1  410.43    8.29
  -4   3  -1  421.22    7.71
   4  -3   1  408.94   10.04
  -5   3  -1   14.95    1.70
  -5   3  -1   13.14    1.49
   5  -3   1   13.16    1.89
  -6   3  -1   49.60    2.97
  -6   3  -1   41.76    2.54
   6  -3   1   50.72    3.41
  -7   3  -1   15.82    2.00
  -7   3  -1   13.60    2.13
   7  -3   1    9.99    2.21
  -8   3  -1    1.80    1.85
  -8   3  -1    2.51    1.64
  -9  -2   1   -0.22    1.76
  -8  -2   1   -0.49    1.48
  -8  -2   1    0.40    1.70
  -7  -2   1   18.02    2.25
  -7  -2   1   19.25    2.02
  -6  -2   1    1.48    1.12
  -6  -2   1    1.38    1.27
  -5  -2   1  177.07    4.74
  -5  -2   1  182.07    4.42
  -4  -2   1   10.39    1.12
  -4  -2   1    9.65    1.19
  -3  -2   1  555.86    9.43
  -3  -2   1  568.26    8.76
   2   2  -1  312.55    7.88
  -2  -2   1  296.96    4.93
  -2  -2   1  312.12    5.38
   1   2  -1  373.27    8.94
  -1  -2   1  338.88    9.18
  -1  -2   1  375.97    5.78
   0   2  -1  557.39   12.66
   0  -2   1  544.51   10.86
   0  -2   1  532.61   13.05
  -1   2  -1    5.29    0.95
   1  -2   1    4.55    0.78
   1  -2   1    5.47    1.47
  -2   2  -1   83.37    2.02
  -2   2  -1   86.79    2.39
  -2   2  -1   86.68    2.10
   2  -2   1   82.35    2.85
   2  -2   1   84.79    3.53
  -3   2  -1   16.42    1.30
  -3   2  -1   16.91    1.28
  -3   2  -1   18.50    1.16
   3  -2   1   17.33    1.63
  -4   2  -1   29.85    1.70
  -4   2  -1   28.09    1.77
  -4   2  -1   27.39    1.81
   4  -2   1   30.49    2.18
  -5   2  -1   -0.92    1.01
  -5   2  -1    1.04    0.89
  -5   2  -1    0.56    1.04
   5  -2   1    1.10    1.20
  -6   2  -1    4.39    1.22
  -6   2  -1    4.85    1.48
  -6   2  -1    3.21    1.29
   6  -2   1    3.86    1.45
  -7   2  -1    6.66    1.89
  -7   2  -1    7.62    1.67
  -8   2  -1   39.97    3.47
  -8   2  -1   36.49    2.80
  -9   2  -1    0.02    1.80
  -9  -1   1   32.23    2.96
  -8  -1   1    3.17    1.78
  -8  -1   1    1.44    1.53
  -7  -1   1   82.26    3.83
  -7  -1   1   81.01    3.49
  -6  -1   1    8.10    1.52
  -6  -1   1    9.93    1.47
  -5  -1   1   79.38    2.83
  -5  -1   1   74.14    2.90
  -4  -1   1   12.42    1.26
  -4  -1   1   11.09    1.15
  -3  -1   1   29.47    1.42
  -3  -1   1   30.25    1.54
  -2  -1   1  200.01    3.50
  -2  -1   1  196.27    3.75
   1   1  -1  427.47    9.58
  -1  -1   1  410.25    9.63
  -1  -1   1  414.55    6.03
  -1  -1   1  409.74    6.46
   0   1  -1   68.38    2.17
   0  -1   1   72.64    2.50
   0  -1   1   71.36    1.89
  -1   1  -1  408.99    9.64
   1  -1   1  394.95    9.82
   1  -1   1  451.27    8.47
  -2   1  -1   40.64    1.53
  -2   1  -1   39.48    1.48
  -2   1  -1   40.56    1.34
   2  -1   1   40.09    1.71
  -3   1  -1   18.04    1.40
  -3   1  -1   19.74    1.30
  -3   1  -1   20.87    1.29
   3  -1   1   19.53    1.51
  -4   1  -1  106.84    2.98
  -4   1  -1  105.20    3.41
  -4   1  -1  113.91    3.32
   4  -1   1  115.75    3.77
  -5   1  -1   46.19    2.47
  -5   1  -1   43.70    2.45
  -5   1  -1   41.67    2.10
   5  -1   1   45.79    2.61
  -6   1  -1   25.33    2.29
  -6   1  -1   28.04    2.13
  -6   1  -1   25.81    2.12
   6  -1   1   25.96    2.37
  -7   1  -1   43.53    3.16
  -7   1  -1   42.74    2.80
  -8   1  -1    1.87    1.81
  -8   1  -1   -2.37    1.35
  -9   1  -1    9.97    2.22
  -9   0   1    7.65    2.04
  -8   0   1   16.61    2.39
  -8   0   1   14.16    2.09
  -7   0   1    3.92    1.48
  -7   0   1    3.73    1.52
  -6   0   1    0.20    0.97
  -6   0   1    0.76    1.14
  -5   0   1  102.84    3.64
  -5   0   1  101.11    3.20
  -5   0   1   97.23    3.34
  -4   0   1   20.09    1.36
  -4   0   1   21.31    1.47
  -4   0   1   23.06    1.76
  -3   0   1  113.33    2.87
  -3   0   1  120.52    3.14
  -3   0   1  120.59    2.75
  -2   0   1   74.47    1.90
  -2   0   1   80.02    1.84
  -2   0   1   75.07    2.06
   1   0  -1   81.51    1.73
  -1   0   1   77.94    1.53
  -1   0   1   81.55    1.65
   0   0  -1    0.11    0.35
   0   0   1   -0.01    0.44
  -1   0  -1  216.68    3.98
  -1   0  -1  220.36    5.28
   1   0   1  214.56    4.41
   1   0   1  209.92    5.62
  -2   0  -1   41.37    1.58
  -2   0  -1   46.46    1.54
  -2   0  -1   44.43    1.36
   2   0   1   47.00    1.58
  -3   0  -1  613.02    9.60
  -3   0  -1  609.52   11.14
  -3   0  -1  611.32   10.34
   3   0   1  652.67   12.60
  -4   0  -1    1.55    0.80
  -4   0  -1    2.57    0.95
  -4   0  -1    1.60    0.95
   4   0   1    2.21    0.82
  -5   0  -1  239.65    6.14
  -5   0  -1  247.52    5.89
  -5   0  -1  244.36    5.44
   5   0   1  248.27    6.27
  -6   0  -1   27.01    2.34
  -6   0  -1   27.50    2.12
  -6   0  -1   26.07    2.21
  -7   0  -1   42.25    3.22
  -7   0  -1   42.89    2.72
  -8   0  -1   37.68    2.94
  -9   0  -1    0.88    1.74
  -9   1   1    1.24    1.74
  -8   1   1    2.48    1.55
  -8   1   1    2.45    1.72
  -7   1   1   -0.08    1.29
  -7   1   1    1.37    1.31
  -6   1   1  100.71    3.56
  -6   1   1  107.44    3.98
  -6   1   1  101.65    3.74
  -5   1   1    3.95    0.97
  -5   1   1    3.87    1.22
  -5   1   1    3.41    1.08
  -4   1   1  294.63    6.05
  -4   1   1  303.34    5.79
  -4   1   1  319.18    6.58
  -3   1   1   24.01    1.30
  -3   1   1   27.24    1.47
  -3   1   1   27.08    1.38
  -2   1   1   31.53    1.22
  -2   1   1   31.06    1.16
  -2   1   1   33.08    1.24
   1  -1  -1  842.67   13.53
   1  -1  -1  809.54   18.36
  -1   1   1  848.36   18.39
  -1   1   1  828.26   11.48
  -1   1   1  821.46   13.43
  -1   1   1  819.43   12.30
   0  -1  -1   75.45    2.52
   0  -1  -1   74.28    1.46
   0   1   1   75.41    2.61
  -1  -1  -1 1000.00   14.04
  -1  -1  -1  986.40   16.69
   1   1   1  990.81   22.16
  -2  -1  -1  119.79    2.76
  -2  -1  -1  117.48    2.94
  -2  -1  -1  121.51    2.47
   2   1   1  123.42    4.03
  -3  -1  -1  299.86    6.39
  -3  -1  -1  327.63    5.51
  -3  -1  -1  305.05    5.93
   3   1   1  317.81    6.47
  -4  -1  -1    9.37    1.18
  -4  -1  -1    8.20    1.18
  -4  -1  -1    7.98    1.06
   4   1   1    7.18    0.91
  -5  -1  -1   -1.59    0.89
  -5  -1  -1   -0.44    0.90
  -5  -1  -1    1.29    0.98
  -6  -1  -1   -1.19    1.12
  -6  -1  -1   -0.62    1.06
  -6  -1  -1    1.09    1.33
  -7  -1  -1   45.87    2.79
  -8  -1  -1    4.68    1.75
  -9  -1  -1    7.03    2.17
  -9   2   1    2.22    1.81
  -8   2   1   57.44    3.67
  -8   2   1   63.03    3.49
   7  -2  -1    0.74    1.59
  -7   2   1   -2.17    1.21
  -7   2   1    0.77    1.20
   6  -2  -1   92.14    4.44
  -6   2   1   82.91    3.19
  -6   2   1   85.32    3.44
  -6   2   1   92.24    3.72
  -5   2   1    2.27    1.10
  -5   2   1    2.25    1.03
  -5   2   1    1.88    1.06
  -4   2   1   38.47    1.87
  -4   2   1   35.77    1.89
  -4   2   1   37.94    1.75
  -3   2   1   49.86    1.76
  -3   2   1   51.41    1.80
  -3   2   1   50.97    1.82
  -2   2   1   14.38    0.94
  -2   2   1   13.83    0.94
  -2   2   1   13.35    0.93
  -1   2   1  132.31    2.24
  -1   2   1  132.42    2.40
  -1   2   1  129.16    2.34
  -1   2   1  133.75    4.07
   0   2   1  296.77    7.80
   0   2   1  303.11    5.05
  -1  -2  -1   19.19    0.69
  -1  -2  -1   24.41    2.71
  -1  -2  -1   17.86    1.00
   1   2   1   19.31    2.04
  -2  -2  -1   76.73    2.13
  -2  -2  -1   80.31    3.82
  -2  -2  -1   83.46    1.89
  -2  -2  -1   79.06    2.40
   2   2   1   79.27    3.49
  -3  -2  -1   80.35    2.80
  -3  -2  -1   84.90    2.60
  -3  -2  -1   86.12    2.28
   3   2   1   82.75    3.72
  -4  -2  -1   -0.27    0.96
  -4  -2  -1    0.68    0.75
  -4  -2  -1   -0.41    0.88
   4   2   1   -0.19    1.32
  -5  -2  -1   48.16    2.27
  -5  -2  -1   45.53    2.46
  -5  -2  -1   44.12    2.69
  -6  -2  -1    2.99    1.41
  -6  -2  -1    4.02    1.25
  -7  -2  -1    7.87    1.69
  -8  -2  -1    6.69    1.83
  -9   3   1    8.35    2.14
   8  -3  -1    8.73    2.49
  -8   3   1    7.46    1.93
  -8   3   1    5.69    1.65
   7  -3  -1    3.71    1.95
  -7   3   1    4.56    1.56
  -7   3   1    6.73    1.60
   6  -3  -1   10.87    2.11
  -6   3   1    8.78    1.52
  -6   3   1    7.85    1.33
  -6   3   1   11.15    1.66
  -5   3   1    1.85    1.00
  -5   3   1    0.86    0.94
  -5   3   1    0.50    0.95
  -4   3   1   99.41    2.90
  -4   3   1   94.65    2.81
  -4   3   1   99.97    3.02
  -3   3   1   19.68    1.25
  -3   3   1   22.69    1.29
  -3   3   1   20.82    1.29
   2  -3  -1  157.31    5.71
  -2   3   1  171.19    3.29
  -2   3   1  170.85    3.20
  -2   3   1  170.96    5.06
  -2   3   1  170.94    3.15
  -1   3   1   46.83    2.68
  -1   3   1   44.87    1.04
  -1   3   1   44.73    1.10
  -1   3   1   44.57    1.07
   0  -3  -1   11.66    1.15
   0  -3  -1   16.47    2.38
   0   3   1   10.19    0.64
   0   3   1   15.36    1.94
  -1  -3  -1    8.85    2.39
  -1  -3  -1    8.68    0.75
  -1  -3  -1    7.21    0.49
   1   3   1    9.26    1.75
  -2  -3  -1  149.03    5.84
  -2  -3  -1  144.21    2.73
   2   3   1  138.77    5.28
  -3  -3  -1    9.13    0.87
  -3  -3  -1    9.65    1.18
  -3  -3  -1   10.14    2.31
  -3  -3  -1    8.24    1.02
   3   3   1    8.27    1.86
  -4  -3  -1  279.57    5.35
  -4  -3  -1  272.13    5.96
   4   3   1  276.67    8.69
  -5  -3  -1   11.85    1.45
   5   3   1   15.52    2.67
  -6  -3  -1   60.33    2.83
  -7  -3  -1   27.42    2.36
  -8  -3  -1   -1.84    1.43
   8  -4  -1   -0.64    1.94
  -8   4   1    0.16    1.52
   7  -4  -1   11.62    2.47
  -7   4   1   13.94    1.96
  -7   4   1   13.37    1.93
  -7   4   1   13.72    1.89
   6  -4  -1   17.53    2.61
  -6   4   1   13.71    1.66
  -6   4   1   13.77    1.70
  -6   4   1   18.50    1.88
   5  -4  -1  144.59    5.79
  -5   4   1  131.56    3.77
  -5   4   1  148.94    4.18
  -5   4   1  141.47    3.99
   4  -4  -1    0.89    1.35
   4  -4  -1    0.07    2.24
  -4   4   1    1.70    0.83
  -4   4   1    1.82    0.87
  -4   4   1    0.75    0.79
   3  -4  -1  196.87    7.33
  -3   4   1  177.78    3.70
  -3   4   1  182.79    3.77
  -3   4   1  179.71    3.92
   2  -4  -1  258.96    8.96
  -2   4   1  279.73    7.86
  -2   4   1  277.44    4.60
  -2   4   1  283.05    4.69
  -2   4   1  277.88    4.92
   1  -4  -1   74.15    2.96
   1  -4  -1   79.06    4.70
  -1   4   1   73.35    3.63
  -1   4   1   74.45    1.47
   0  -4  -1  373.42    8.19
   0  -4  -1  361.67   11.23
   0   4   1  375.03   10.28
  -1  -4  -1    0.26    0.64
  -1  -4  -1   -0.57    2.14
   1   4   1    0.48    1.42
  -2  -4  -1  239.35    8.85
  -2  -4  -1  260.44    4.14
   2   4   1  270.36    8.46
  -3  -4  -1    5.53    2.75
   3   4   1    3.69    1.99
  -4  -4  -1   50.39    2.03
   4   4   1   45.91    3.98
  -5  -4  -1   20.15    1.66
   5   4   1   22.13    3.32
  -6  -4  -1    0.88    1.28
   8  -5  -1   -0.10    2.20
  -8   5   1    0.23    1.53
   7  -5  -1   66.98    4.72
  -7   5   1   66.12    3.27
  -7   5   1   72.38    3.54
   6  -5  -1   16.35    2.66
  -6   5   1   18.90    1.95
  -6   5   1   14.95    1.77
   5  -5  -1   57.23    5.14
   5  -5  -1   54.63    3.94
  -5   5   1   57.70    2.46
  -5   5   1   60.92    2.63
  -5   5   1   59.20    2.56
   4  -5  -1   36.89    3.13
   4  -5  -1   40.04    4.39
  -4   5   1   40.62    1.96
  -4   5   1   42.80    1.92
  -4   5   1   38.49    1.86
   3  -5  -1    6.74    1.55
   3  -5  -1    7.26    2.94
  -3   5   1    5.87    0.82
  -3   5   1    6.99    0.83
  -3   5   1    6.57    0.89
   2  -5  -1   95.73    4.05
   2  -5  -1  102.89    6.10
  -2   5   1  105.93    2.26
  -2   5   1   99.32    4.55
  -2   5   1  102.76    2.23
  -2   5   1  104.08    2.07
   1  -5  -1  177.11    7.86
   1  -5  -1  178.92    5.33
  -1   5   1  185.18    6.56
  -1   5   1  187.48    2.85
   0  -5  -1   78.53    2.96
   0  -5  -1   68.82    5.29
   0   5   1   75.59    4.23
  -1  -5  -1   43.76    2.12
  -1  -5  -1   52.37    5.16
   1   5   1   46.52    3.73
  -2  -5  -1   27.07    4.01
   2   5   1   26.66    3.23
  -3  -5  -1    0.08    2.98
   3   5   1    0.93    2.09
   4   5   1   82.34    5.25
   5   5   1    5.03    2.89
   6   5   1   30.17    4.24
   8  -6  -1    0.95    2.41
  -8   6   1   -0.56    1.49
   7  -6  -1    2.04    2.20
  -7   6   1    0.08    1.32
   6  -6  -1   -0.58    1.81
  -6   6   1    1.56    1.23
   5  -6  -1   48.48    5.36
   5  -6  -1   50.46    3.95
  -5   6   1   53.42    2.46
   4  -6  -1    7.73    2.00
   4  -6  -1    9.45    3.66
  -4   6   1    7.26    1.09
   3  -6  -1   92.49    4.32
   3  -6  -1   91.07    6.26
  -3   6   1   91.34    2.43
   2  -6  -1    4.09    1.49
   2  -6  -1    6.10    3.20
  -2   6   1    6.84    0.69
  -2   6   1    5.91    2.09
   1  -6  -1   14.29    3.79
   1  -6  -1   15.03    1.77
  -1   6   1   18.56    2.75
   0  -6  -1    0.13    0.94
   0  -6  -1    1.37    3.06
   0   6   1    0.80    1.92
  -1  -6  -1   31.46    2.08
  -1  -6  -1   16.53    4.14
   1   6   1   25.46    3.33
  -2  -6  -1    8.75    3.60
   2   6   1    7.13    2.60
   3   6   1  110.16    6.24
   4   6   1    7.71    3.19
   5   6   1   67.20    5.52
   6   6   1   12.93    3.77
   7   6   1   14.85    3.81
   8  -7  -1    0.01    2.53
  -8   7   1    0.70    1.51
   7  -7  -1   10.52    2.98
  -7   7   1    8.72    1.71
   6  -7  -1   22.90    5.29
   6  -7  -1   21.73    3.14
  -6   7   1   18.90    1.82
   5  -7  -1    5.52    2.18
   5  -7  -1    7.92    4.26
  -5   7   1    5.16    1.20
   4  -7  -1   51.02    3.89
   4  -7  -1   54.99    6.03
   3  -7  -1   10.81    4.30
   3  -7  -1   11.20    2.01
   2  -7  -1   45.86    5.68
   2  -7  -1   39.95    2.94
  -2   7   1   41.39    3.95
   1  -7  -1  111.72    7.64
   1  -7  -1  112.20    4.50
  -1   7   1  120.16    5.91
   0  -7  -1   10.16    4.23
   0  -7  -1   16.25    1.84
   0   7   1   15.50    3.17
  -1  -7  -1  199.41    5.77
   1   7   1  191.64    8.33
  -2  -7  -1    7.59    4.36
   2   7   1   16.17    3.51
   3   7   1   75.51    5.65
   4   7   1    9.14    3.55
   5   7   1    2.62    3.24
   6   7   1    2.83    3.30
   7  -8  -1   -1.67    2.36
   6  -8  -1   28.54    6.42
   6  -8  -1   32.15    3.96
   5  -8  -1    1.92    2.25
   5  -8  -1    1.19    4.56
   4  -8  -1   30.36    6.02
   4  -8  -1   22.03    3.13
   3  -8  -1   34.56    6.01
   3  -8  -1   48.57    3.75
   2  -8  -1   -0.09    4.03
   2  -8  -1   -0.32    1.49
   1  -8  -1   52.77    6.57
   1  -8  -1   52.55    3.47
  -1   8   1   56.64    4.84
   0  -8  -1   24.02    2.42
   0  -8  -1    8.03    4.75
   0   8   1   27.37    4.07
  -1  -8  -1   -0.71    4.46
   1   8   1    0.29    2.65
  -2  -8  -1    6.83    4.66
   2   8   1    9.28    3.54
   3   8   1   19.12    4.40
   4   8   1   -1.87    2.95
   5   8   1   17.96    4.39
   7  -9  -1    0.03    2.89
   6  -9  -1   -1.91    5.23
   6  -9  -1    0.74    2.48
   5  -9  -1    2.65    2.38
   5  -9  -1    0.61    5.20
   4  -9  -1   35.28    6.62
   4  -9  -1   30.52    3.71
   3  -9  -1    0.38    4.43
   3  -9  -1    0.93    1.95
   2  -9  -1   20.34    5.93
   2  -9  -1   36.09    3.47
   1  -9  -1    0.36    5.00
   1  -9  -1    1.27    1.70
  -1   9   1    0.95    2.82
   0  -9  -1    0.70    4.96
   0   9   1    6.71    3.42
  -1  -9  -1   -0.12    4.68
   1   9   1    2.63    3.36
   2   9   1   33.22    5.39
   3   9   1    7.65    4.15
   4   9   1   47.51    6.20
   6 -10  -1    6.01    3.47
   5 -10  -1   11.15    3.31
   4 -10  -1    0.70    2.35
   4 -10  -1    0.10    4.85
   3 -10  -1    3.50    5.16
   3 -10  -1   14.80    2.96
   2 -10  -1   28.02    3.41
   1 -10  -1    0.33    5.20
   1 -10  -1    1.10    1.98
   0  10   1   93.43    7.18
  -1 -10  -1    0.95    5.21
   1  10   1    3.56    3.94
   2  10   1   51.12    6.79
   3  10   1    5.94    4.19
   5 -11  -1   12.59    3.68
   4 -11  -1   16.29    3.51
   3 -11  -1   -2.65    4.72
   3 -11  -1   -0.13    2.27
   2 -11  -1   25.82    3.40
   2 -11  -1   17.63    6.76
   1 -11  -1   -2.77    5.56
   0 -11  -1    5.11    6.01
   0  11   1   12.22    4.63
   1  11   1   -1.03    4.04
   2  11   1    3.18    4.71
   3 -12  -1    7.60    2.92
   1  12  -2   -0.63    3.99
   0 -12   2   -1.79    6.03
   2 -12   2    1.94    2.52
   3 -12   2   12.45    3.32
   3  11  -2   15.13    4.95
   2  11  -2    0.98    3.90
   1  11  -2   62.07    6.38
   0  11  -2    2.28    3.68
   0 -11   2    3.14    5.58
   1 -11   2    1.98    5.79
   1 -11   2   42.22    4.38
   2 -11   2    2.67    5.54
   2 -11   2   14.34    3.00
   3 -11   2    1.51    5.03
   3 -11   2    4.31    2.62
   4 -11   2   15.46    3.41
   5 -11   2    3.19    2.95
   4  10  -2   -0.06    3.36
   3  10  -2   35.60    5.60
   2  10  -2   -0.69    3.22
   1  10  -2    8.46    3.90
  -1 -10   2    2.19    5.58
   0  10  -2   -1.11    2.93
   0 -10   2    0.95    5.46
  -1  10  -2    2.42    3.04
   1 -10   2    1.65    1.96
   1 -10   2   -0.59    5.24
   2 -10   2    3.79    2.17
   2 -10   2    2.57    4.89
   3 -10   2   23.62    3.35
   3 -10   2    2.91    4.52
   4 -10   2   -1.57    4.42
   4 -10   2    9.83    2.88
   5 -10   2   18.41    3.64
   5 -10   2   15.94    5.80
   6 -10   2   -1.11    2.77
   5   9  -2   -0.03    3.05
   4   9  -2   33.06    5.13
   3   9  -2    1.01    3.17
   2   9  -2    9.51    3.62
   1   9  -2   16.82    3.93
  -1  -9   2    8.03    5.44
   0   9  -2    4.98    3.04
   0  -9   2    5.19    5.31
   0  -9   2    8.68    2.13
  -1   9  -2   32.50    4.43
   1  -9   2   23.46    2.91
   1  -9   2    9.80    5.36
   2  -9   2    6.65    4.85
   3  -9   2    2.60    4.26
   3  -9   2    6.63    2.35
   4  -9   2    2.55    4.53
   4  -9   2   11.62    2.89
   5  -9   2    4.91    4.86
   5  -9   2    4.15    2.62
   6  -9   2    6.33    5.01
   6  -9   2    5.20    2.93
   7  -9   2   23.69    4.15
   6   8  -2    6.87    3.23
   5   8  -2   14.41    3.77
   4   8  -2    0.34    2.71
   3   8  -2    0.64    2.64
   2   8  -2   95.80    6.06
  -2  -8   2   92.04    7.56
   1   8  -2   -0.75    2.31
  -1  -8   2   -2.34    4.31
   0   8  -2  147.87    7.03
   0  -8   2  149.42    5.69
  -1   8  -2   14.91    3.13
   1  -8   2   13.65    2.11
   1  -8   2    8.72    4.58
  -2   8  -2   72.83    4.91
   2  -8   2   64.55    6.67
   2  -8   2   65.09    4.15
   3  -8   2   45.01    3.80
  -4   8  -2    9.67    1.35
   4  -8   2    3.27    4.26
   4  -8   2    8.84    2.40
  -5   8  -2   47.07    2.59
   5  -8   2   48.39    4.39
   5  -8   2   50.04    6.32
  -6   8  -2    0.12    1.33
   6  -8   2    0.45    2.33
   6  -8   2   -2.97    4.21
  -7   8  -2    9.93    1.92
   7  -8   2   12.27    3.27
   7   7  -2   18.97    3.83
   6   7  -2   46.37    4.76
   5   7  -2    8.10    3.14
   4   7  -2  103.10    6.21
   3   7  -2    5.24    2.73
   2   7  -2  104.46    5.97
  -2  -7   2  108.24    7.23
   1   7  -2    0.46    1.97
  -1  -7   2    0.43    3.88
   0   7  -2   24.06    3.32
   0  -7   2   21.73    2.39
   0  -7   2   12.60    4.47
  -1   7  -2    7.03    2.40
  -1   7  -2    6.59    0.78
   1  -7   2    6.70    1.69
   1  -7   2    5.71    3.77
  -2   7  -2   56.20    4.11
  -2   7  -2   53.59    1.92
   2  -7   2   48.26    5.62
   2  -7   2   54.71    3.44
  -3   7  -2   18.66    1.46
  -3   7  -2   16.58    1.67
   3  -7   2   11.94    4.23
   3  -7   2   15.79    2.37
  -4   7  -2   72.86    3.13
  -4   7  -2   72.57    2.72
   4  -7   2   63.36    4.33
  -5   7  -2    1.51    1.10
   5  -7   2    1.21    2.00
   5  -7   2    1.26    3.69
  -6   7  -2    8.49    1.72
   6  -7   2   11.82    4.35
   6  -7   2    7.41    2.61
  -7   7  -2    4.17    1.67
   7  -7   2    3.36    2.66
   8  -7   2    0.01    2.61
  -7  -6   2   -0.68    1.53
   6   6  -2   25.14    3.69
  -6  -6   2   23.47    2.39
   5   6  -2   19.08    3.37
  -5  -6   2   17.71    1.84
   4   6  -2    9.53    2.71
  -4  -6   2    8.03    1.36
   3   6  -2   31.09    3.62
  -3  -6   2   27.61    1.80
   2   6  -2   80.64    4.97
  -2  -6   2   89.58    6.05
  -2  -6   2   91.62    2.39
   1   6  -2    2.19    1.79
  -1  -6   2    1.43    3.26
  -1  -6   2    0.81    0.48
   0   6  -2  169.87    6.68
   0  -6   2  177.71    5.54
  -1   6  -2   13.01    2.41
   1  -6   2    6.37    3.32
   1  -6   2   10.11    1.58
  -2   6  -2   25.47    1.34
  -2   6  -2   25.98    2.93
   2  -6   2   24.55    4.27
   2  -6   2   24.21    2.48
  -3   6  -2   37.15    1.76
  -3   6  -2   40.32    2.27
   3  -6   2   39.25    3.12
   3  -6   2   29.13    4.49
  -4   6  -2    2.64    1.15
  -4   6  -2    2.09    0.98
   4  -6   2    1.17    1.61
   4  -6   2    0.84    3.50
  -5   6  -2    4.63    1.27
  -5   6  -2    5.71    1.53
   5  -6   2    4.22    3.56
   5  -6   2    5.82    1.97
  -6   6  -2   57.47    3.01
  -6   6  -2   58.35    3.37
   6  -6   2   56.49    4.42
  -7   6  -2    1.10    1.43
   7  -6   2    1.68    2.29
  -8   6  -2   43.75    3.29
   8  -6   2   45.53    4.59
  -8  -5   2   -0.09    1.70
  -7  -5   2   29.08    2.77
   6   5  -2   -0.32    2.05
  -6  -5   2   -1.24    1.24
   5   5  -2    5.13    2.30
  -5  -5   2    4.33    1.32
   4   5  -2    3.68    2.09
  -4  -5   2    3.68    1.07
   3   5  -2   83.50    4.65
  -3  -5   2   91.75    2.78
  -3  -5   2   96.76    5.18
   2   5  -2    3.29    1.70
  -2  -5   2    1.17    2.43
   1   5  -2  381.64   11.17
  -1  -5   2  404.92    6.41
  -1  -5   2  396.76   12.30
   0   5  -2   21.79    2.48
   0  -5   2   20.53    1.91
   0  -5   2   17.68    3.29
  -1   5  -2  283.18    8.55
   1  -5   2  278.46    7.47
   1  -5   2  295.67    9.93
  -2   5  -2  142.64    5.30
  -2   5  -2  142.08    3.10
   2  -5   2  144.19    4.97
   2  -5   2  131.83    6.59
  -3   5  -2   18.21    1.66
  -3   5  -2   19.31    1.41
   3  -5   2   18.87    2.03
   3  -5   2   15.44    3.41
  -4   5  -2  151.73    3.98
  -4   5  -2  161.32    4.62
   4  -5   2  159.96    7.27
   4  -5   2  160.75    5.93
  -5   5  -2    0.21    1.12
  -5   5  -2    0.60    1.07
   5  -5   2    1.11    1.56
   5  -5   2    2.39    2.76
  -6   5  -2   49.70    2.83
  -6   5  -2   53.09    3.26
   6  -5   2   56.57    4.13
  -7   5  -2    0.51    1.39
  -7   5  -2   -0.11    1.61
   7  -5   2    2.44    2.06
  -8   5  -2    9.33    2.13
  -8  -4   2   17.05    2.60
  -7  -4   2   21.36    2.37
  -6  -4   2   11.74    1.76
   5   4  -2  135.32    5.60
  -5  -4   2  131.52    4.11
   4   4  -2   20.50    2.54
  -4  -4   2   16.31    1.46
   3   4  -2  386.82   10.87
  -3  -4   2  414.70    7.31
  -3  -4   2  385.59   10.84
   2   4  -2   11.61    1.91
  -2  -4   2   12.82    1.08
  -2  -4   2   11.67    2.57
   1   4  -2  301.96    8.75
  -1  -4   2  314.49    9.51
  -1  -4   2  304.06    5.10
   0   4  -2   18.44    2.08
   0  -4   2   11.50    2.56
   0  -4   2   15.29    1.48
  -1   4  -2    6.88    1.53
   1  -4   2    6.61    2.39
   1  -4   2    8.48    1.24
  -2   4  -2   39.55    2.60
   2  -4   2   39.53    2.36
   2  -4   2   46.66    3.73
  -3   4  -2   97.56    3.16
  -3   4  -2   92.71    2.64
  -3   4  -2   91.70    3.91
   3  -4   2   96.96    3.95
   3  -4   2   98.95    5.14
  -4   4  -2   17.66    1.70
  -4   4  -2   17.98    1.47
   4  -4   2   19.94    2.16
   4  -4   2   20.96    3.24
  -5   4  -2   46.84    2.42
  -5   4  -2   51.01    2.78
   5  -4   2   49.42    3.38
  -6   4  -2    1.07    1.37
  -6   4  -2    3.25    1.31
   6  -4   2    1.61    1.71
  -7   4  -2    5.60    1.86
  -7   4  -2    4.42    1.51
   7  -4   2    3.71    2.09
  -8   4  -2    9.42    2.09
  -8  -3   2    6.71    2.02
  -8  -3   2    5.13    1.86
  -7  -3   2   40.16    2.99
  -7  -3   2   40.09    2.70
  -6  -3   2   35.58    2.43
  -6  -3   2   34.55    2.33
  -5  -3   2   52.19    2.59
  -5  -3   2   52.57    2.42
   4   3  -2  119.12    4.63
  -4  -3   2  124.96    3.29
  -4  -3   2  124.37    3.53
   3   3  -2    2.94    1.31
  -3  -3   2    1.78    0.73
   2   3  -2    5.37    1.43
  -2  -3   2    3.62    1.60
  -2  -3   2    3.55    0.67
   1   3  -2   56.48    2.95
  -1  -3   2   59.81    3.56
   0   3  -2    0.22    1.00
   0  -3   2    0.71    1.71
   0  -3   2    1.37    0.77
  -1   3  -2  146.27    4.78
   1  -3   2  158.15    5.65
   1  -3   2  152.02    4.31
  -2   3  -2   17.60    1.96
   2  -3   2   17.21    2.56
   2  -3   2   18.50    1.69
  -3   3  -2  126.41    3.62
  -3   3  -2  125.76    3.13
   3  -3   2  132.61    5.15
   3  -3   2  125.14    4.20
  -4   3  -2   18.17    1.39
  -4   3  -2   19.19    1.71
   4  -3   2   17.57    1.84
   4  -3   2   19.93    2.82
  -5   3  -2   12.61    1.69
  -5   3  -2   11.89    1.46
   5  -3   2   11.92    1.90
  -6   3  -2   -0.33    1.10
  -6   3  -2    0.89    1.40
   6  -3   2    1.54    1.54
  -7   3  -2   62.42    3.75
  -7   3  -2   55.64    3.20
  -8   3  -2    0.17    1.52
  -9  -2   2    1.10    1.73
  -9  -2   2   -0.57    1.91
  -8  -2   2   28.64    2.64
  -8  -2   2   29.08    2.84
  -7  -2   2   10.20    1.90
  -7  -2   2   10.19    1.75
  -6  -2   2   18.24    1.81
  -6  -2   2   18.86    1.92
  -5  -2   2   16.84    1.57
  -4  -2   2    0.78    0.77
  -4  -2   2    0.66    0.76
   3   2  -2   28.78    2.12
  -3  -2   2   26.67    1.40
  -3  -2   2   26.01    1.49
   2   2  -2  127.08    4.03
  -2  -2   2  122.14    4.06
  -2  -2   2  119.84    2.71
   1   2  -2  180.79    5.16
  -1  -2   2  183.34    5.46
   0   2  -2  631.71   14.83
   0  -2   2  655.37   15.29
   0  -2   2  646.75   12.95
  -1   2  -2  103.96    3.60
   1  -2   2  106.72    4.02
   1  -2   2  104.73    3.09
  -2   2  -2  204.88    5.93
  -2   2  -2  201.92    4.53
   2  -2   2  210.70    5.22
   2  -2   2  207.21    6.25
  -3   2  -2  439.05    7.34
  -3   2  -2  430.69    8.47
   3  -2   2  436.32    9.76
   3  -2   2  438.39   11.19
  -4   2  -2   44.56    2.25
  -4   2  -2   44.07    1.96
   4  -2   2   46.56    2.59
   4  -2   2   45.09    3.23
  -5   2  -2  178.89    4.53
  -5   2  -2  171.34    5.15
   5  -2   2  178.89    5.55
  -6   2  -2    1.41    1.18
  -6   2  -2   -0.10    1.34
   6  -2   2    1.60    1.40
  -7   2  -2   45.81    3.38
  -7   2  -2   42.13    2.86
  -8   2  -2    1.66    1.65
  -9  -1   2   13.26    2.54
  -9  -1   2   11.02    2.25
  -8  -1   2    2.50    1.51
  -8  -1   2    0.35    1.59
  -7  -1   2   21.39    2.10
  -7  -1   2   18.16    2.16
  -6  -1   2   91.17    3.39
  -6  -1   2   97.65    3.69
  -5  -1   2   13.64    1.47
  -5  -1   2   14.59    1.40
  -4  -1   2  333.73    6.64
  -4  -1   2  336.41    6.23
  -3  -1   2    6.50    0.81
  -3  -1   2    8.15    0.87
  -2  -1   2  272.67    4.54
  -2  -1   2  264.91    4.80
   1   1  -2  202.56    5.34
  -1  -1   2  210.17    5.60
   0   1  -2  108.41    3.43
   0  -1   2  115.90    3.86
  -1   1  -2  502.89   12.04
   1  -1   2  481.46   12.13
   1  -1   2  531.15   10.21
  -2   1  -2   26.69    1.99
  -2   1  -2   25.79    1.43
   2  -1   2   27.15    2.39
   2  -1   2   26.08    1.44
  -3   1  -2  157.43    4.02
  -3   1  -2  158.72    3.49
   3  -1   2  161.20    5.23
   3  -1   2  154.75    4.20
  -4   1  -2  158.45    3.84
  -4   1  -2  151.50    4.32
   4  -1   2  154.85    4.49
  -5   1  -2   -0.92    1.06
  -5   1  -2    0.46    0.87
   5  -1   2    0.31    1.06
  -6   1  -2    8.47    1.77
  -6   1  -2   10.67    1.62
  -7   1  -2   23.67    2.30
  -7   1  -2   21.70    2.60
  -8   1  -2    3.96    1.63
  -9   0   2    5.39    2.01
  -9   0   2    6.86    2.26
  -8   0   2   22.11    2.51
  -8   0   2   19.14    2.32
  -7   0   2    1.35    1.35
  -7   0   2    4.77    1.56
  -6   0   2   78.43    3.31
  -6   0   2   80.56    3.17
  -5   0   2    6.60    1.23
  -5   0   2    7.57    1.20
  -4   0   2   22.80    1.62
  -4   0   2   22.43    1.49
  -3   0   2   14.51    1.13
  -3   0   2   14.15    1.21
  -2   0   2  147.84    3.03
  -2   0   2  145.12    2.87
   1   0  -2    1.29    0.82
  -1   0   2    0.22    0.90
   0   0  -2  617.96   14.31
   0   0   2  617.93   14.54
  -1   0  -2    8.78    0.74
  -1   0  -2    9.42    1.28
   1   0   2    8.49    1.62
  -2   0  -2  228.21    4.73
  -2   0  -2  235.51    5.95
  -2   0  -2  228.78    4.01
   2   0   2  216.94    6.77
   2   0   2  218.78    4.86
  -3   0  -2    3.49    0.85
  -3   0  -2    4.04    0.77
   3   0   2    5.17    1.75
   3   0   2    4.05    0.72
  -4   0  -2    0.70    0.73
  -4   0  -2    0.78    0.98
   4   0   2    0.85    0.75
  -5   0  -2    3.27    0.99
  -5   0  -2    3.98    1.21
  -6   0  -2   52.53    2.74
  -6   0  -2   50.48    3.13
  -7   0  -2    7.18    2.02
  -7   0  -2    4.83    1.59
  -8   0  -2   44.78    3.14
  -9   1   2    5.87    2.05
  -9   1   2    5.12    2.10
  -8   1   2   -0.58    1.54
  -8   1   2    2.24    1.58
  -7   1   2   38.68    2.62
  -7   1   2   37.45    2.62
  -6   1   2    2.21    1.07
  -6   1   2    1.80    1.18
  -5   1   2   28.55    1.87
  -5   1   2   27.91    1.97
  -4   1   2    8.88    1.02
  -4   1   2    7.34    1.10
  -3   1   2  144.17    3.14
  -3   1   2  140.92    3.25
   2  -1  -2   44.13    2.25
  -2   1   2   41.71    1.40
  -2   1   2   41.36    1.45
   1  -1  -2  828.73   18.78
  -1   1   2  829.81   18.67
   0  -1  -2    0.78    0.85
   0   1   2    0.52    1.03
  -1  -1  -2   90.41    2.22
  -1  -1  -2   92.59    3.34
   1   1   2   89.17    3.70
  -2  -1  -2  155.24    3.01
  -2  -1  -2  154.38    3.60
   2   1   2  158.71    5.38
  -3  -1  -2   45.27    1.69
  -3  -1  -2   45.45    2.13
   3   1   2   47.55    3.10
   3   1   2   43.40    1.40
  -4  -1  -2  219.94    4.69
  -4  -1  -2  215.88    5.53
   4   1   2  225.03    7.07
  -5  -1  -2    8.37    1.43
  -5  -1  -2    5.43    1.18
  -6  -1  -2  135.81    4.17
  -6  -1  -2  125.87    4.89
  -7  -1  -2    1.80    1.37
  -7  -1  -2    0.45    1.52
  -8  -1  -2   16.89    2.34
  -9   2   2    4.50    1.92
  -9   2   2    2.74    2.08
  -8   2   2   15.50    2.18
  -8   2   2   14.26    2.30
  -7   2   2   13.03    1.83
  -7   2   2   12.42    1.84
  -6   2   2    4.10    1.16
  -6   2   2    2.67    1.25
  -5   2   2  193.92    4.63
  -5   2   2  189.35    4.78
  -4   2   2    8.76    1.11
  -4   2   2   10.62    1.14
  -4   2   2    7.83    1.09
  -3   2   2  479.49    7.77
  -3   2   2  491.09    8.25
   2  -2  -2   63.39    2.80
  -2   2   2   66.42    1.75
  -2   2   2   49.44    2.51
  -2   2   2   61.39    1.64
   1  -2  -2  562.19   13.77
  -1   2   2  594.88   13.84
   0  -2  -2    4.98    0.45
   0   2   2    5.22    1.39
  -1  -2  -2   31.04    1.27
  -1  -2  -2   33.04    3.04
   1   2   2   29.00    2.61
  -2  -2  -2  179.56    3.27
  -2  -2  -2  177.67    4.08
   2   2   2  181.85    6.12
  -3  -2  -2   70.03    2.07
  -3  -2  -2   68.66    2.55
   3   2   2   68.68    3.81
  -4  -2  -2   70.41    2.39
  -4  -2  -2   67.09    2.92
   4   2   2   72.01    4.07
   5   2   2   17.58    2.68
  -6  -2  -2    2.94    1.56
  -6  -2  -2    3.73    1.29
  -7  -2  -2    0.05    1.43
  -8  -2  -2   12.21    2.11
  -9   3   2   16.19    2.48
  -9   3   2   13.46    2.51
   8  -3  -2    6.15    2.37
  -8   3   2    5.69    1.78
  -8   3   2    3.69    1.79
   7  -3  -2   87.96    5.08
  -7   3   2   91.95    3.72
  -7   3   2   89.44    3.87
  -6   3   2    8.67    1.52
  -6   3   2    6.64    1.38
  -5   3   2   73.90    2.75
  -5   3   2   72.07    2.79
  -4   3   2   65.10    2.31
  -4   3   2   68.29    2.33
  -4   3   2   63.65    2.33
  -3   3   2   16.11    1.12
  -3   3   2   13.37    1.01
  -3   3   2   14.34    1.02
   2  -3  -2   -1.17    1.76
  -2   3   2    2.64    0.56
  -2   3   2    2.90    0.55
  -2   3   2    3.21    1.25
   0   3   2   86.75    4.05
   0   3   2   90.43    1.81
  -1  -3  -2  117.19    2.78
  -1  -3  -2  120.36    2.94
  -1  -3  -2  120.97    2.05
   1   3   2  119.97    4.98
  -2  -3  -2    3.75    2.10
  -2  -3  -2    5.29    0.99
  -2  -3  -2    5.14    0.65
   2   3   2    7.39    1.97
  -3  -3  -2   84.73    2.31
  -3  -3  -2   80.89    3.02
  -3  -3  -2   86.16    4.84
   3   3   2   87.36    4.60
  -4  -3  -2    5.53    1.34
  -4  -3  -2    5.38    0.96
   4   3   2    4.18    2.22
  -5  -3  -2    0.96    0.94
  -5  -3  -2    0.70    1.26
   5   3   2    0.18    1.98
  -6  -3  -2    6.24    1.44
   6   3   2   11.73    3.02
  -7  -3  -2   42.65    2.72
   8  -4  -2   15.11    3.09
  -8   4   2   14.21    2.14
  -8   4   2   15.51    2.41
   7  -4  -2    2.81    2.23
  -7   4   2    7.00    1.57
  -7   4   2    4.62    1.51
   6  -4  -2   14.76    2.60
  -6   4   2   18.44    1.79
  -6   4   2   19.07    1.80
  -5   4   2    2.17    1.01
  -5   4   2    2.78    1.02
   4  -4  -2    0.24    2.38
  -4   4   2    1.29    0.84
  -4   4   2    1.92    0.82
  -4   4   2    2.74    0.81
   3  -4  -2  115.52    5.61
  -3   4   2  117.03    2.77
  -3   4   2  121.44    2.87
  -3   4   2  117.66    2.62
  -2   4   2   69.12    1.78
  -2   4   2   69.97    1.81
  -2   4   2   74.20    3.63
   0  -4  -2  170.99    6.66
   0  -4  -2  146.06    4.17
   0   4   2  139.95    5.74
   0   4   2  152.75    2.85
  -1  -4  -2   63.57    2.14
  -1  -4  -2   62.70    4.64
   1   4   2   61.77    3.99
  -2  -4  -2   72.03    5.09
  -2  -4  -2   71.72    1.69
   2   4   2   71.36    4.43
  -3  -4  -2  240.63    8.98
  -3  -4  -2  235.98    4.35
   3   4   2  229.41    8.44
  -4  -4  -2    3.59    0.98
   4   4   2    4.44    2.51
  -5  -4  -2  157.10    4.09
   5   4   2  153.84    7.14
   8  -5  -2    0.28    2.34
  -8   5   2   -1.54    1.33
   7  -5  -2    1.21    2.10
  -7   5   2    1.67    1.51
  -7   5   2   -0.75    1.19
   6  -5  -2   52.33    4.16
  -6   5   2   45.53    2.49
  -6   5   2   50.40    2.73
   5  -5  -2    1.39    1.61
  -5   5   2    2.77    0.99
  -5   5   2    2.55    1.05
   4  -5  -2  153.61    7.56
  -4   5   2  158.45    3.74
  -4   5   2  167.87    3.92
   3  -5  -2   26.98    4.24
  -3   5   2   26.07    1.36
  -3   5   2   25.65    1.41
   2  -5  -2  202.60    8.32
  -2   5   2  202.72    3.60
  -2   5   2  191.39    3.48
  -2   5   2  197.04    6.86
   1  -5  -2   89.08    5.74
   1  -5  -2   82.86    3.48
  -1   5   2   86.05    4.56
   0  -5  -2   40.19    2.23
   0  -5  -2   41.91    4.66
   0   5   2   40.46    3.63
  -1  -5  -2  269.46   10.10
  -1  -5  -2  255.23    6.11
   1   5   2  250.99    8.98
  -2  -5  -2   18.43    3.91
   2   5   2   15.93    3.10
   3   5   2  106.76    5.96
   4   5   2   17.96    3.52
   5   5   2   -1.11    2.63
   6   5   2    0.87    3.11
   8  -6  -2   15.86    3.28
  -8   6   2   15.57    2.19
   7  -6  -2   -1.06    2.16
  -7   6   2   -0.34    1.24
   6  -6  -2   61.34    5.88
   6  -6  -2   62.72    4.71
  -6   6   2   62.57    2.81
   5  -6  -2    2.21    3.87
   5  -6  -2   -0.55    1.64
  -5   6   2    1.16    0.98
   4  -6  -2   44.39    5.52
   4  -6  -2   50.08    3.80
  -4   6   2   45.73    1.98
   3  -6  -2   18.07    4.14
   3  -6  -2   15.75    2.17
  -3   6   2   15.61    1.23
   2  -6  -2   27.75    2.66
   2  -6  -2   31.33    4.76
  -2   6   2   28.80    3.24
   1  -6  -2    1.83    3.08
   1  -6  -2    4.28    1.33
  -1   6   2    3.12    2.09
   0  -6  -2  151.34    4.83
   0  -6  -2  167.82    8.47
   0   6   2  156.56    7.00
  -1  -6  -2    3.52    3.43
  -1  -6  -2    2.48    1.09
   1   6   2    2.05    2.32
  -2  -6  -2   83.06    6.55
   2   6   2   73.68    5.35
   3   6   2    0.05    2.41
   4   6   2    0.82    2.72
   5   6   2    5.54    3.53
   6   6   2   12.34    4.05
   7   6   2    8.03    3.76
   8  -7  -2    6.61    3.09
   7  -7  -2   14.71    3.21
   6  -7  -2    2.49    2.29
   6  -7  -2   -1.33    4.08
   5  -7  -2   12.52    2.68
   5  -7  -2    5.77    4.32
   4  -7  -2   19.67    2.80
   4  -7  -2   15.69    4.66
   3  -7  -2    4.79    1.89
   3  -7  -2    3.95    3.87
   2  -7  -2   32.94    5.68
   2  -7  -2   43.22    3.17
  -2   7   2   41.31    3.91
   1  -7  -2   55.72    3.24
   1  -7  -2   50.45    6.17
  -1   7   2   59.68    4.69
   0  -7  -2    4.58    4.21
   0  -7  -2   10.55    1.67
   0   7   2   10.13    3.04
  -1  -7  -2   29.17    5.38
   1   7   2   28.70    4.17
  -2  -7  -2   25.34    5.48
   2   7   2   30.40    4.60
   3   7   2    3.40    3.24
   4   7   2   68.94    6.03
   5   7   2    6.90    3.82
   6   7   2   42.05    5.72
   7  -8  -2    4.56    2.90
   6  -8  -2    0.57    2.42
   6  -8  -2   -3.06    4.48
   5  -8  -2   32.31    3.80
   5  -8  -2   30.92    6.34
   4  -8  -2   -1.54    4.21
   4  -8  -2    0.69    1.93
   3  -8  -2   89.85    7.75
   3  -8  -2   92.92    5.04
   2  -8  -2    6.79    4.68
   2  -8  -2   11.13    2.17
   1  -8  -2   83.92    7.66
   1  -8  -2   81.00    4.23
  -1   8   2   86.45    5.78
   0  -8  -2   65.84    3.64
   0   8   2   66.09    5.55
  -1  -8  -2    3.08    4.61
   1   8   2    6.76    3.52
   2   8   2   61.65    5.98
   3   8   2    1.39    3.58
   4   8   2   15.89    4.55
   5   8   2   -0.50    3.52
   6  -9  -2    1.13    5.26
   6  -9  -2   -0.98    2.43
   5  -9  -2   23.15    6.31
   5  -9  -2   26.26    3.74
   4  -9  -2    0.57    4.96
   4  -9  -2    0.07    2.14
   3  -9  -2   -0.56    4.67
   3  -9  -2    0.00    1.86
   2  -9  -2    9.52    2.42
   2  -9  -2    4.99    5.21
   1  -9  -2    7.82    2.12
   1  -9  -2    7.07    5.50
  -1   9   2   14.24    3.80
   0  -9  -2    3.44    5.16
   0   9   2   16.07    4.19
  -1  -9  -2    5.92    5.05
   1   9   2   14.48    4.45
   2   9   2    1.59    3.70
   3   9   2   14.87    4.76
   4   9   2   10.09    4.48
   6 -10  -2    2.24    3.07
   5 -10  -2    3.81    2.86
   4 -10  -2    0.34    2.30
   4 -10  -2    2.33    4.75
   3 -10  -2   22.61    6.47
   3 -10  -2   20.50    3.30
   2 -10  -2    1.66    5.50
   2 -10  -2    3.77    2.25
   1 -10  -2    9.72    6.23
   0 -10  -2    4.27    5.76
   0  10   2    0.59    3.57
  -1 -10  -2   -0.47    5.06
   1  10   2    6.36    4.26
   2  10   2    1.14    4.16
   3  10   2   34.45    6.34
   4 -11  -2   21.09    3.82
   3 -11  -2   -0.65    2.26
   1 -11  -2    1.88    6.04
   0 -11  -2    7.34    6.13
   1  11   2   34.74    6.69
   1  12  -3    1.72    4.11
   0 -12   3   -0.07    5.72
   1 -12   3   -2.46    5.77
   2 -12   3    0.69    2.57
   3 -12   3    6.30    3.08
   3  11  -3    4.54    4.13
   2  11  -3    3.02    4.16
   1  11  -3    2.79    3.73
   0  11  -3   -3.18    3.16
   0 -11   3   -0.70    5.27
   1 -11   3   -0.46    5.47
   2 -11   3   22.15    3.47
   2 -11   3   12.29    6.17
   3 -11   3   -3.36    4.25
   3 -11   3    0.81    2.37
   4 -11   3   33.05    4.47
   5 -11   3    4.26    3.19
   4  10  -3    0.48    3.44
   3  10  -3   19.98    4.81
   2  10  -3   58.83    6.01
   1  10  -3   12.63    4.15
  -1 -10   3    5.49    5.87
  -1  10  -3    1.97    3.12
   1 -10   3    2.40    2.10
   1 -10   3   -6.52    4.88
   2 -10   3   39.55    3.95
   2 -10   3    4.19    5.11
   3 -10   3   -1.55    4.21
   3 -10   3    6.44    2.61
   4 -10   3    1.88    4.41
   4 -10   3    9.16    2.85
   5 -10   3    2.52    2.66
   5 -10   3    3.84    4.50
   6 -10   3    3.71    3.06
   5   9  -3   11.60    3.81
   4   9  -3   13.86    4.04
   3   9  -3    2.76    3.21
   2   9  -3   44.73    5.08
  -1  -9   3   10.08    5.41
   0   9  -3   11.29    3.51
   0  -9   3   -1.28    5.09
  -1   9  -3   29.46    4.23
   1  -9   3   24.13    2.96
   2  -9   3    0.31    4.30
   2  -9   3   18.20    2.67
   3  -9   3    2.45    2.03
   3  -9   3   -0.56    4.07
   4  -9   3   22.16    3.35
   5  -9   3    1.56    2.45
   5  -9   3    1.45    4.51
   6  -9   3    8.15    3.04
   6  -9   3    7.12    4.87
   6   8  -3    1.36    2.79
   5   8  -3   35.82    4.82
   4   8  -3    1.31    2.70
   3   8  -3   95.41    6.12
   2   8  -3   -0.08    2.34
  -2  -8   3   -1.70    3.66
   1   8  -3   15.07    3.33
  -1  -8   3    8.81    4.85
   0   8  -3   -0.49    2.29
   0  -8   3   -1.92    4.11
   0  -8   3    1.09    1.57
  -1   8  -3   42.58    4.27
   1  -8   3   38.99    3.32
  -2   8  -3    2.10    2.39
   2  -8   3    1.96    3.91
   2  -8   3    0.52    1.43
  -3   8  -3   85.29    3.57
  -3   8  -3   86.91    2.84
   3  -8   3   86.00    4.96
  -4   8  -3    2.30    1.16
   4  -8   3    0.08    3.97
   4  -8   3    2.14    2.04
  -5   8  -3   33.25    2.44
   5  -8   3   33.89    3.90
   5  -8   3   31.68    5.72
  -6   8  -3    7.36    1.77
   6  -8   3   11.17    2.97
   6  -8   3   10.36    4.66
  -7   8  -3    5.95    1.84
   7  -8   3    2.50    2.70
   7   7  -3   10.61    3.28
   6   7  -3   38.80    4.59
   5   7  -3   -0.03    2.50
   4   7  -3   37.76    4.23
   3   7  -3   32.66    3.98
   2   7  -3   22.76    3.45
  -2  -7   3   16.10    4.17
   1   7  -3  128.62    6.26
   0   7  -3   19.27    3.16
   0  -7   3    7.45    3.98
   0  -7   3   18.05    2.22
  -1   7  -3  225.75    8.25
   1  -7   3  215.83    7.02
  -2   7  -3    9.90    1.10
  -2   7  -3   13.35    2.77
   2  -7   3    3.86    3.49
   2  -7   3   10.19    1.98
  -3   7  -3   69.25    2.56
   3  -7   3   68.35    4.11
  -4   7  -3   18.22    1.61
  -4   7  -3   17.89    1.96
   4  -7   3   15.41    4.28
   4  -7   3   17.89    2.69
  -5   7  -3    3.37    1.51
  -5   7  -3    0.04    1.14
   5  -7   3    2.16    3.84
   5  -7   3   -0.08    1.98
  -6   7  -3   14.97    2.00
   6  -7   3   19.24    3.25
   6  -7   3   19.29    4.76
  -7   7  -3   12.65    2.10
   7  -7   3   15.81    3.33
   8  -7   3    0.04    2.56
  -8  -6   3   26.91    2.96
  -7  -6   3    6.16    1.83
   6   6  -3   43.76    4.27
  -6  -6   3   49.78    3.03
   5   6  -3   36.47    3.94
  -5  -6   3   37.18    2.57
   4   6  -3   33.82    3.80
  -4  -6   3   25.88    2.01
   3   6  -3   95.03    5.34
  -3  -6   3  106.81    3.06
   2   6  -3   28.19    3.33
  -2  -6   3   25.71    1.44
  -2  -6   3   20.81    3.80
   1   6  -3   47.43    3.78
  -1  -6   3   49.88    1.55
  -1  -6   3   38.91    4.69
   0   6  -3   26.28    3.13
   0  -6   3   25.27    2.43
   0  -6   3   13.62    3.70
  -1   6  -3   17.08    2.59
   1  -6   3   12.72    3.53
   1  -6   3   15.80    1.97
  -2   6  -3    1.05    1.68
   2  -6   3    1.04    1.33
   2  -6   3    0.36    2.81
  -3   6  -3   48.54    2.13
   3  -6   3   48.18    3.47
   3  -6   3   49.05    4.96
  -4   6  -3    2.27    1.01
  -4   6  -3   -0.83    1.07
   4  -6   3    3.63    1.77
   4  -6   3    2.49    3.21
  -5   6  -3   52.21    2.71
  -5   6  -3   45.92    2.92
   5  -6   3   51.51    3.98
   5  -6   3   48.46    5.04
  -6   6  -3    4.23    1.52
  -6   6  -3    2.50    1.57
   6  -6   3    5.74    2.30
   6  -6   3   -2.57    3.24
  -7   6  -3   13.98    2.40
  -7   6  -3   11.29    2.05
   7  -6   3   12.43    2.93
  -8   6  -3   -0.27    1.75
  -8  -5   3    0.51    1.80
  -7  -5   3    0.08    1.49
   6   5  -3   29.22    3.43
  -6  -5   3   23.05    2.30
   5   5  -3    5.78    2.24
  -5  -5   3    4.15    1.28
   4   5  -3   47.47    3.82
  -4  -5   3   56.93    2.45
   3   5  -3    7.18    2.10
  -3  -5   3    5.87    1.01
  -3  -5   3    8.52    2.51
   2   5  -3   30.20    3.01
  -2  -5   3   34.50    1.54
   1   5  -3   17.99    2.48
  -1  -5   3   13.01    2.92
  -1  -5   3   16.75    1.03
   0   5  -3   20.70    2.61
   0  -5   3   20.94    2.13
   0  -5   3   13.98    3.14
  -1   5  -3  102.98    4.54
   1  -5   3   84.94    5.32
   1  -5   3   98.71    3.88
  -2   5  -3   70.57    3.85
   2  -5   3   69.31    3.39
   2  -5   3   71.93    4.94
  -3   5  -3   22.23    1.94
  -3   5  -3   22.89    1.62
   3  -5   3   19.97    3.59
   3  -5   3   20.03    2.11
  -4   5  -3  137.21    4.54
  -4   5  -3  138.00    3.87
   4  -5   3  141.63    6.74
   4  -5   3  141.58    5.55
  -5   5  -3   36.05    2.61
  -5   5  -3   32.06    2.25
   5  -5   3   30.64    2.94
   5  -5   3   36.49    4.24
  -6   5  -3   20.53    2.11
  -6   5  -3   27.09    2.58
   6  -5   3   26.41    3.00
   6  -5   3   19.64    3.93
  -7   5  -3   44.14    3.52
  -7   5  -3   39.57    3.00
   7  -5   3   40.95    4.14
  -8   5  -3    2.57    1.80
  -8  -4   3    6.16    2.01
  -7  -4   3   13.70    2.05
  -6  -4   3   33.57    2.51
   5   4  -3   22.28    2.83
  -5  -4   3   24.39    2.03
   4   4  -3    0.16    1.52
  -4  -4   3   -0.37    0.87
   3   4  -3   40.80    3.11
  -3  -4   3   35.41    3.14
   2   4  -3  202.84    6.65
  -2  -4   3  204.57    4.12
  -2  -4   3  207.37    7.01
   1   4  -3   31.37    2.65
  -1  -4   3   33.50    3.22
   0   4  -3  661.48   16.37
   0  -4   3  659.13   14.25
   0  -4   3  685.35   17.29
  -1   4  -3   18.40    2.09
   1  -4   3   12.02    2.57
   1  -4   3   15.27    1.57
  -2   4  -3  335.64    9.36
   2  -4   3  341.65    8.48
   2  -4   3  333.46   10.28
  -3   4  -3   23.67    2.76
  -3   4  -3   21.82    1.49
  -3   4  -3   20.66    1.86
   3  -4   3   25.08    3.39
   3  -4   3   21.44    2.06
  -4   4  -3   53.10    2.71
  -4   4  -3   54.63    2.42
   4  -4   3   53.97    4.25
   4  -4   3   56.17    3.31
  -5   4  -3   35.76    2.58
  -5   4  -3   33.78    2.15
   5  -4   3   37.74    3.02
   5  -4   3   31.45    3.78
  -6   4  -3    4.61    1.38
  -6   4  -3    5.78    1.60
   6  -4   3    4.64    1.85
  -7   4  -3   27.53    2.79
  -7   4  -3   21.26    2.37
  -8   4  -3   17.68    2.48
  -8  -3   3    0.01    1.64
  -7  -3   3   79.03    3.87
  -6  -3   3   10.80    1.60
  -5  -3   3   39.61    2.36
   4   3  -3  145.93    5.18
  -4  -3   3  148.89    3.93
   3   3  -3   13.93    1.84
  -3  -3   3   11.61    1.11
  -3  -3   3   15.31    2.00
   2   3  -3  571.23   14.06
  -2  -3   3  577.64    9.39
  -2  -3   3  565.99   14.17
   1   3  -3   12.18    1.69
  -1  -3   3   11.94    2.13
   0   3  -3  230.41    6.77
   0  -3   3  232.03    7.28
  -1   3  -3   12.00    1.67
   1  -3   3   10.25    1.19
   1  -3   3   13.01    2.39
  -2   3  -3   23.04    2.36
   2  -3   3   23.17    1.76
   2  -3   3   27.73    2.89
  -3   3  -3   10.32    1.96
  -3   3  -3    8.03    1.06
  -3   3  -3    9.02    1.27
   3  -3   3    9.25    2.39
   3  -3   3    7.90    1.25
  -4   3  -3  147.13    3.90
  -4   3  -3  148.97    4.63
   4  -3   3  153.92    5.12
   4  -3   3  158.10    6.20
  -5   3  -3    4.38    1.16
  -5   3  -3    6.68    1.48
   5  -3   3    5.70    2.40
   5  -3   3    4.12    1.53
  -6   3  -3   39.72    2.62
  -6   3  -3   44.77    3.19
   6  -3   3   38.78    3.20
  -7   3  -3    5.57    1.68
  -7   3  -3    3.98    1.90
  -8   3  -3   -2.07    1.50
  -9  -2   3   14.15    2.57
  -8  -2   3    0.52    1.59
  -8  -2   3    2.77    1.75
  -7  -2   3    0.84    1.31
  -7  -2   3    1.71    1.44
  -6  -2   3   27.36    2.27
  -6  -2   3   27.26    2.11
  -5  -2   3   72.33    2.91
  -5  -2   3   71.84    2.81
  -4  -2   3    1.02    0.87
  -4  -2   3    1.09    0.85
  -3  -2   3  232.96    4.82
   2   2  -3    2.08    1.02
  -2  -2   3    1.12    1.24
   1   2  -3  127.08    4.30
  -1  -2   3  131.49    4.75
   0   2  -3    0.95    1.02
   0  -2   3    1.31    1.46
  -1   2  -3  187.25    5.72
   1  -2   3  185.13    4.78
   1  -2   3  189.00    6.11
  -2   2  -3  117.26    4.43
   2  -2   3  118.99    3.51
   2  -2   3  101.81    4.55
  -3   2  -3  146.01    3.47
  -3   2  -3  140.22    4.10
   3  -2   3  150.62    4.44
   3  -2   3  149.38    5.60
  -4   2  -3    7.15    1.29
  -4   2  -3    7.31    1.08
   4  -2   3    6.17    1.32
   4  -2   3    9.62    2.34
  -5   2  -3   15.38    1.64
  -5   2  -3   14.64    1.79
   5  -2   3   15.33    1.82
   5  -2   3   18.60    3.03
  -6   2  -3   24.44    2.12
  -6   2  -3   23.23    2.37
  -7   2  -3    5.98    1.75
  -7   2  -3    6.23    2.03
  -8   2  -3   49.66    3.47
  -9  -1   3    7.77    2.26
  -8  -1   3    1.10    1.53
  -8  -1   3    0.59    1.56
  -7  -1   3   36.70    2.51
  -7  -1   3   32.49    2.55
  -6  -1   3   32.13    2.36
  -6  -1   3   30.09    2.21
  -5  -1   3    5.10    1.24
  -5  -1   3    7.65    1.18
  -4  -1   3   68.81    2.35
  -4  -1   3   61.77    2.38
  -3  -1   3  107.04    2.71
  -3  -1   3  108.52    2.87
   2   1  -3    1.10    0.95
   1   1  -3  291.50    7.52
  -1  -1   3  285.90    7.87
   0   1  -3   12.47    1.55
   0  -1   3   14.99    1.88
  -1   1  -3  242.22    7.15
   1  -1   3  258.49    7.39
  -2   1  -3  145.98    3.72
  -2   1  -3  135.56    4.83
   2  -1   3  142.28    3.78
   2  -1   3  139.98    5.21
  -3   1  -3  226.75    5.38
  -3   1  -3  227.88    4.59
   3  -1   3  222.26    5.52
   3  -1   3  232.90    7.46
  -4   1  -3  118.97    3.35
  -4   1  -3  115.85    3.85
   4  -1   3  117.96    5.60
   4  -1   3  123.52    3.83
  -5   1  -3    1.69    1.07
  -5   1  -3    3.62    1.37
  -6   1  -3   87.93    4.06
  -6   1  -3   87.22    3.43
  -7   1  -3   13.53    2.38
  -7   1  -3    8.92    1.87
  -8   1  -3   11.47    2.19
  -9   0   3   -0.13    1.84
  -9   0   3    1.95    1.84
  -8   0   3   36.95    3.08
  -8   0   3   37.24    2.92
  -7   0   3   10.27    1.76
  -7   0   3   10.90    1.82
  -6   0   3   78.29    3.18
  -6   0   3   76.86    3.24
  -5   0   3  129.43    3.88
  -5   0   3  132.83    3.76
  -4   0   3   44.25    1.89
  -4   0   3   42.59    2.04
  -3   0   3  324.55    6.04
  -3   0   3  314.62    5.64
   2   0  -3    1.83    1.08
   1   0  -3   56.44    2.84
  -1   0   3   55.96    2.93
   0   0  -3   12.90    1.73
   0   0   3   13.95    2.03
  -1   0  -3    2.15    1.27
   1   0   3    1.34    1.59
  -2   0  -3   92.60    2.78
  -2   0  -3   98.79    3.75
   2   0   3   85.97    4.42
  -3   0  -3   58.27    2.02
  -3   0  -3   63.39    2.48
   3   0   3   61.39    3.99
   3   0   3   58.75    2.13
  -4   0  -3   34.68    2.25
  -4   0  -3   35.14    1.90
   4   0   3   32.40    1.77
   4   0   3   31.51    3.46
  -5   0  -3   64.56    2.73
  -5   0  -3   64.59    3.16
   5   0   3   59.66    4.30
  -6   0  -3   -0.43    1.16
  -6   0  -3    0.07    1.39
  -7   0  -3   23.72    2.36
  -7   0  -3   22.45    2.65
  -8   0  -3    3.06    1.78
  -9   1   3    1.02    1.76
  -9   1   3    1.54    1.88
  -8   1   3    2.38    1.68
  -8   1   3    2.01    1.61
  -7   1   3   10.25    1.68
  -7   1   3    8.76    1.76
  -6   1   3   23.58    2.02
  -6   1   3   22.71    1.95
  -5   1   3   13.10    1.49
  -5   1   3   11.75    1.39
  -4   1   3   73.72    2.54
  -4   1   3   75.61    2.49
  -3   1   3   37.61    1.62
  -3   1   3   38.52    1.56
   2  -1  -3   82.85    3.60
  -2   1   3   88.43    3.22
   0  -1  -3    0.94    1.12
   0   1   3    0.62    1.31
  -1  -1  -3  362.54    6.57
  -1  -1  -3  355.82    9.42
   1   1   3  344.03    9.94
  -2  -1  -3   33.49    1.63
  -2  -1  -3   35.25    2.61
   2   1   3   31.99    3.06
  -3  -1  -3   77.58    2.85
  -3  -1  -3   85.18    2.41
   3   1   3   78.87    4.37
  -4  -1  -3   83.52    2.74
  -4  -1  -3   80.23    3.26
   4   1   3   76.37    4.52
  -5  -1  -3    7.64    1.31
  -5  -1  -3    7.09    1.49
   5   1   3    9.37    2.50
  -6  -1  -3   24.30    2.39
  -6  -1  -3   25.39    2.10
  -7  -1  -3   41.34    2.83
  -7  -1  -3   43.38    3.55
  -8  -1  -3    1.66    1.68
  -9   2   3    1.10    1.77
  -9   2   3    2.35    1.97
   8  -2  -3   16.17    2.95
  -8   2   3   15.79    2.21
  -8   2   3   15.02    2.24
  -7   2   3   17.87    2.10
  -7   2   3   19.24    2.06
  -6   2   3   73.40    3.03
  -6   2   3   81.35    3.32
  -5   2   3   14.01    1.53
  -5   2   3   15.96    1.53
  -4   2   3   10.14    1.18
  -4   2   3    9.81    1.14
   3  -2  -3    0.45    1.12
  -3   2   3    0.08    0.60
  -3   2   3    0.89    0.58
   2  -2  -3  310.36    8.53
  -2   2   3  310.97    8.27
   1  -2  -3   40.11    2.73
  -1   2   3   40.09    2.86
   0  -2  -3  750.00   11.93
   0  -2  -3  713.43   17.50
   0   2   3  731.61   17.84
  -1  -2  -3   11.57    0.94
  -1  -2  -3   15.00    1.98
   1   2   3   13.10    2.22
  -2  -2  -3  451.65    7.03
  -2  -2  -3  454.05    8.46
   2   2   3  444.42   12.49
  -3  -2  -3   17.77    2.51
   3   2   3   10.27    2.39
  -4  -2  -3   47.08    2.60
  -4  -2  -3   45.85    2.11
   4   2   3   48.72    4.02
  -5  -2  -3  106.44    3.36
  -5  -2  -3   94.33    3.89
   5   2   3  100.51    5.47
  -6  -2  -3   -0.43    1.12
  -6  -2  -3   -1.12    1.27
   6   2   3    1.30    2.43
  -7  -2  -3   44.35    2.94
  -7  -2  -3   44.39    3.56
  -8  -2  -3    1.24    1.68
  -9   3   3   15.47    2.47
  -9   3   3   15.06    2.69
   8  -3  -3   -0.51    2.04
  -8   3   3    0.69    1.55
  -8   3   3   -0.10    1.44
  -7   3   3   45.44    2.93
  -7   3   3   42.81    2.76
  -6   3   3   23.08    1.91
  -6   3   3   23.17    1.95
  -5   3   3   34.95    2.09
  -5   3   3   41.26    2.15
   4  -3  -3  192.55    7.37
  -4   3   3  197.83    4.49
  -4   3   3  200.61    4.34
  -3   3   3    2.07    0.69
  -3   3   3    2.34    0.69
  -2   3   3  628.82   15.36
  -1   3   3    1.92    1.42
   0  -3  -3  219.70    3.87
   0   3   3  207.60    7.16
  -1  -3  -3   19.39    1.18
   1   3   3   20.90    2.75
  -2  -3  -3   42.19    1.43
  -2  -3  -3   45.11    1.97
   2   3   3   44.45    3.71
  -3  -3  -3    3.16    2.46
  -3  -3  -3    3.25    1.11
  -3  -3  -3    4.22    0.84
   3   3   3    5.18    2.26
  -4  -3  -3   85.80    2.67
  -4  -3  -3   83.10    3.47
   4   3   3   82.37    5.19
  -5  -3  -3    0.32    1.35
  -5  -3  -3    0.71    1.00
   5   3   3    0.99    2.38
  -6  -3  -3   31.88    2.24
  -6  -3  -3   27.58    2.71
   6   3   3   31.16    4.22
   9  -4  -3    9.17    3.23
  -9   4   3   10.35    2.49
   8  -4  -3    9.07    2.87
  -8   4   3    9.85    2.01
  -8   4   3    8.76    1.90
   7  -4  -3    0.32    2.08
  -7   4   3    1.66    1.47
  -7   4   3    2.31    1.37
  -6   4   3   47.00    2.51
  -6   4   3   46.42    2.67
  -5   4   3   13.06    1.43
  -5   4   3   13.13    1.43
  -4   4   3   26.51    1.70
  -4   4   3   27.99    1.63
  -3   4   3   90.71    2.50
  -3   4   3   89.24    2.40
  -2   4   3   37.48    3.08
  -2   4   3   38.17    1.45
  -1  -4  -3   28.12    1.59
  -1  -4  -3   28.99    0.86
   1   4   3   31.57    3.47
  -2  -4  -3   61.86    1.65
  -2  -4  -3   60.51    2.39
  -2  -4  -3   60.96    4.98
   2   4   3   56.76    4.53
  -3  -4  -3   48.07    5.01
  -3  -4  -3   77.01    2.15
  -3  -4  -3   75.46    3.01
   3   4   3   54.81    4.77
  -4  -4  -3   10.74    1.67
   4   4   3    9.74    3.05
   5   4   3    2.14    2.94
   6   4   3   13.82    3.78
   8  -5  -3    0.91    2.34
  -8   5   3    1.16    1.51
   7  -5  -3   31.33    3.77
  -7   5   3   26.53    2.34
   6  -5  -3    6.53    2.34
  -6   5   3    6.11    1.34
  -6   5   3    3.50    1.36
   5  -5  -3    8.26    3.37
  -5   5   3   14.76    1.50
  -5   5   3   17.11    1.58
   4  -5  -3   -2.29    2.71
  -4   5   3   -0.08    0.82
  -4   5   3    0.41    0.80
   3  -5  -3   24.26    3.90
  -3   5   3   14.59    1.21
  -3   5   3   15.82    1.15
   2  -5  -3    1.49    2.49
  -2   5   3    5.95    2.02
  -2   5   3    3.39    0.67
  -1   5   3   89.44    4.99
   0  -5  -3   -2.91    2.49
   0  -5  -3   -0.27    0.92
   0   5   3   -0.79    1.84
  -1  -5  -3  175.65    4.58
  -1  -5  -3  166.67    8.01
   1   5   3  174.50    7.53
  -2  -5  -3   61.15    5.63
   2   5   3   53.68    4.80
   3   5   3   80.60    5.75
   4   5   3  109.68    6.68
   5   5   3    2.93    3.37
   6   5   3   49.80    5.45
   7   5   3    4.13    3.92
   8  -6  -3   15.83    3.43
  -8   6   3   15.86    2.22
   7  -6  -3    2.34    2.42
  -7   6   3   -0.61    1.28
   6  -6  -3   17.59    3.16
  -6   6   3   22.40    1.97
   5  -6  -3   34.12    3.66
  -5   6   3   35.41    2.10
   4  -6  -3    6.17    3.92
   4  -6  -3    9.80    2.34
  -4   6   3    8.80    1.13
   3  -6  -3  199.91    7.20
   3  -6  -3  202.78    9.49
   2  -6  -3   -4.26    3.19
   2  -6  -3    0.45    1.40
  -2   6   3    1.98    1.99
   1  -6  -3  134.32    7.88
   1  -6  -3  145.82    5.10
  -1   6   3  142.87    6.67
   0  -6  -3   18.77    4.53
   0  -6  -3   16.11    1.78
   0   6   3   18.03    3.35
  -1  -6  -3    3.78    3.74
   1   6   3    5.28    2.83
  -2  -6  -3   34.67    5.54
   2   6   3   34.33    4.63
   3   6   3   11.47    3.69
   4   6   3   14.63    4.13
   5   6   3   25.06    4.78
   6   6   3   -1.60    3.57
   8  -7  -3    4.02    2.84
   7  -7  -3   15.69    3.40
   6  -7  -3    4.77    2.56
   6  -7  -3    2.69    4.33
   5  -7  -3    6.37    4.19
   5  -7  -3   23.91    3.27
   4  -7  -3   15.93    2.74
   4  -7  -3    7.11    4.42
   3  -7  -3   17.28    2.69
   3  -7  -3   13.63    4.62
   2  -7  -3    6.92    1.92
   2  -7  -3    4.49    3.97
  -2   7   3    5.51    2.56
   1  -7  -3    1.82    1.46
   1  -7  -3    2.17    3.94
  -1   7   3    1.23    2.41
   0  -7  -3    0.74    3.82
   0  -7  -3    5.05    1.41
   0   7   3    1.74    2.71
  -1  -7  -3  116.56    8.22
   1   7   3  103.92    6.81
  -2  -7  -3    3.60    4.15
   2   7   3    5.73    3.42
   3   7   3   60.63    5.92
   4   7   3    3.18    3.73
   5   7   3   -0.33    3.66
   7  -8  -3    6.77    3.13
   6  -8  -3    5.06    4.90
   6  -8  -3   13.15    3.21
   5  -8  -3   -1.27    4.44
   5  -8  -3   -0.68    2.22
   4  -8  -3    4.11    2.33
   4  -8  -3    0.02    4.53
   3  -8  -3    5.88    2.19
   3  -8  -3    5.17    4.85
   2  -8  -3   11.63    5.58
   2  -8  -3   17.69    2.52
   1  -8  -3    6.44    5.35
   1  -8  -3    8.28    1.94
  -1   8   3    6.92    3.19
   0  -8  -3   81.09    8.07
   0   8   3   75.90    6.20
  -1  -8  -3    5.21    4.72
   1   8   3    1.16    3.46
   2   8   3   50.56    5.96
   3   8   3   17.25    4.76
   4   8   3   10.97    4.62
   5   8   3   25.09    5.61
   6  -9  -3    6.75    3.28
   5  -9  -3    0.22    5.24
   5  -9  -3    3.41    2.67
   4  -9  -3   35.49    7.03
   4  -9  -3   54.20    4.71
   3  -9  -3    5.45    5.52
   3  -9  -3   -0.53    2.11
   2  -9  -3   66.48    4.46
   1  -9  -3    0.51    5.20
  -1   9   3    3.13    3.20
   0  -9  -3   12.10    5.51
   0   9   3   23.30    4.90
  -1  -9  -3    9.52    5.77
   1   9   3   20.29    5.12
   2   9   3    0.13    4.18
   3   9   3   13.28    5.10
   4   9   3    5.38    4.55
   5 -10  -3    2.41    2.77
   4 -10  -3    4.29    2.63
   4 -10  -3    1.92    5.22
   3 -10  -3   -2.60    4.67
   3 -10  -3    6.14    2.61
   2 -10  -3    3.08    5.62
   2 -10  -3   -0.43    2.08
   1 -10  -3   -3.45    5.46
   0 -10  -3    0.37    5.46
   0  10   3   16.79    4.93
   1  10   3   12.84    5.04
   2  10   3   12.49    5.31
   4 -11  -3    0.86    2.87
   3 -11  -3    3.10    2.70
   1 -11  -3    5.28    6.57
   0 -11  -3   -3.90    5.51
   1  12  -4   15.30    5.11
   0 -12   4    1.49    5.90
   3 -12   4    4.23    3.06
   3  11  -4   -0.88    3.70
   2  11  -4   -4.52    3.45
   1  11  -4   26.36    5.24
   0  11  -4   -1.94    3.28
   0 -11   4    3.19    5.50
   1 -11   4    6.37    5.59
   2 -11   4    0.28    2.46
   2 -11   4   -0.61    4.84
   3 -11   4    1.10    2.51
   3 -11   4    2.17    4.66
   4 -11   4    1.32    2.81
   4  10  -4    0.46    3.47
   3  10  -4   14.54    4.58
   2  10  -4   31.74    5.31
   1  10  -4    0.68    3.27
  -1 -10   4   -0.87    5.23
   0  10  -4   18.74    4.36
   0 -10   4    1.60    5.37
  -1  10  -4   14.69    4.07
   2 -10   4    2.64    4.75
   2 -10   4    2.58    2.26
   3 -10   4   34.46    3.98
   3 -10   4   20.51    5.50
   4 -10   4    1.35    2.46
   4 -10   4   -0.45    4.04
   5 -10   4   47.31    5.00
   5   9  -4   -0.33    2.79
   4   9  -4   45.09    5.20
   3   9  -4    8.40    3.62
   2   9  -4   65.50    5.71
   1   9  -4   37.75    4.66
  -1  -9   4   23.34    5.89
   0   9  -4   16.13    3.79
  -1   9  -4   90.43    6.12
   1  -9   4   82.91    5.08
   2  -9   4    9.07    4.84
   2  -9   4   14.68    2.74
   3  -9   4   20.56    5.09
   3  -9   4   33.63    3.59
   4  -9   4    6.07    2.58
   4  -9   4    2.57    4.15
   5  -9   4    0.72    2.42
   5  -9   4    0.56    3.98
   6  -9   4    0.49    2.59
   6   8  -4   37.27    4.85
   5   8  -4   -0.55    2.73
   4   8  -4    7.20    3.14
   3   8  -4    6.61    3.06
   2   8  -4   24.45    3.97
  -2  -8   4   19.42    4.60
   1   8  -4   22.85    3.79
  -1  -8   4   14.13    4.80
   0   8  -4   57.81    4.88
   0  -8   4   58.27    6.21
  -1   8  -4    6.41    2.84
   1  -8   4    8.21    1.99
   1  -8   4    3.27    4.02
  -2   8  -4   48.37    2.15
  -2   8  -4   48.16    4.50
   2  -8   4   46.81    5.79
   2  -8   4   46.56    3.81
   3  -8   4    4.60    2.00
   3  -8   4    5.86    4.03
  -4   8  -4    2.00    1.17
  -4   8  -4    3.96    1.69
   4  -8   4    6.92    2.38
   4  -8   4    1.15    3.78
  -5   8  -4   17.46    1.99
   5  -8   4   16.16    3.08
   5  -8   4   12.71    4.65
  -6   8  -4   17.49    2.21
   6  -8   4   17.82    3.34
   6  -8   4   16.41    5.31
  -7   8  -4    2.64    1.86
   7  -8   4    4.11    2.89
   6   7  -4   -0.88    2.35
   5   7  -4    0.75    2.48
   4   7  -4   36.48    4.25
   3   7  -4    6.09    2.73
   2   7  -4   75.90    5.09
  -2  -7   4   66.01    5.56
   1   7  -4    9.78    2.80
  -1  -7   4   11.06    3.77
   0   7  -4    4.87    2.38
  -1   7  -4   28.20    3.56
   1  -7   4   21.89    2.54
  -2   7  -4  100.06    5.42
   2  -7   4   95.54    4.80
   2  -7   4   88.98    6.43
  -3   7  -4   11.91    1.36
   3  -7   4   10.96    3.88
   3  -7   4   11.25    2.10
  -4   7  -4  111.76    4.43
  -4   7  -4  113.61    3.71
   4  -7   4  110.64    5.57
   4  -7   4  108.24    7.20
  -5   7  -4    3.80    1.64
  -5   7  -4    7.33    1.55
   5  -7   4    5.68    4.01
   5  -7   4    3.81    2.17
  -6   7  -4   26.34    2.53
  -6   7  -4   30.60    2.88
   6  -7   4   16.55    4.67
   6  -7   4   29.83    3.61
  -7   7  -4    7.06    2.00
   7  -7   4   10.49    2.99
  -8  -6   4   -0.52    1.78
  -7  -6   4   10.46    1.98
   6   6  -4    0.53    2.24
  -6  -6   4   -0.18    1.30
   5   6  -4   46.69    4.23
  -5  -6   4   49.95    2.70
   4   6  -4    5.79    2.38
  -4  -6   4    4.55    1.23
   3   6  -4  142.40    6.52
  -3  -6   4  151.67    3.80
   2   6  -4   31.35    3.52
  -2  -6   4   35.30    1.70
  -2  -6   4   31.85    4.02
   1   6  -4   92.08    5.04
  -1  -6   4   98.34    2.49
  -1  -6   4  103.29    5.98
   0   6  -4  176.28    6.99
   0  -6   4  182.54    8.02
  -1   6  -4    6.18    2.17
   1  -6   4    6.62    3.08
   1  -6   4    4.58    1.58
  -2   6  -4  152.09    6.33
   2  -6   4  153.83    7.45
   2  -6   4  145.39    5.61
  -3   6  -4    0.37    0.91
   3  -6   4    1.04    3.04
   3  -6   4    1.04    1.41
  -4   6  -4   13.22    1.92
  -4   6  -4   13.55    1.61
   4  -6   4   13.66    2.33
   4  -6   4   17.10    4.01
  -5   6  -4    0.50    1.43
  -5   6  -4    0.59    1.21
   5  -6   4   -1.45    3.27
   5  -6   4   -0.63    1.67
  -6   6  -4    7.36    1.98
  -6   6  -4    5.78    1.67
   6  -6   4    3.97    3.72
   6  -6   4    7.64    2.53
  -7   6  -4    0.07    1.62
   7  -6   4    1.37    2.21
  -8  -5   4    4.46    1.97
  -7  -5   4   58.59    3.59
   6   5  -4   -0.92    1.82
  -6  -5   4    0.11    1.31
   5   5  -4   66.39    4.32
  -5  -5   4   62.32    2.98
   4   5  -4   21.93    2.95
  -4  -5   4   18.31    1.66
   3   5  -4   -0.40    1.65
  -3  -5   4    0.87    0.79
   2   5  -4   34.02    3.16
  -2  -5   4   36.81    1.61
  -2  -5   4   34.09    3.64
   1   5  -4   47.62    3.45
  -1  -5   4   48.15    4.11
   0   5  -4    0.56    1.51
   0  -5   4    0.03    2.34
  -1   5  -4  112.16    5.04
   1  -5   4  113.22    4.42
   1  -5   4  112.61    5.90
  -2   5  -4    0.01    1.57
   2  -5   4    0.22    1.18
   2  -5   4   -0.34    2.34
  -3   5  -4   23.64    1.77
   3  -5   4   32.52    4.11
   3  -5   4   23.73    2.35
  -4   5  -4   18.92    2.10
  -4   5  -4   21.44    1.82
   4  -5   4   23.79    3.91
   4  -5   4   20.30    2.41
  -5   5  -4   11.93    2.00
  -5   5  -4   13.72    1.74
   5  -5   4   13.97    3.66
   5  -5   4   14.13    2.32
  -6   5  -4   25.88    2.69
  -6   5  -4   27.89    2.35
   6  -5   4   24.11    4.24
   6  -5   4   25.35    3.00
  -7   5  -4   15.07    2.24
  -7   5  -4   13.71    2.55
  -8   5  -4    0.82    1.84
  -8  -4   4    8.61    2.11
  -7  -4   4    0.81    1.46
  -6  -4   4    5.86    1.52
   5   4  -4   48.80    3.45
  -5  -4   4   42.74    2.50
   4   4  -4    3.26    1.74
  -4  -4   4    2.16    0.99
   3   4  -4  122.02    5.05
  -3  -4   4  124.21    5.30
  -3  -4   4  121.96    3.30
   2   4  -4   93.94    4.34
  -2  -4   4   99.79    4.79
  -2  -4   4   97.24    2.66
   1   4  -4   55.81    3.36
  -1  -4   4   53.44    3.81
   0   4  -4   30.27    2.76
   0  -4   4   33.19    3.31
  -1   4  -4   23.32    2.66
   1  -4   4   20.33    2.09
   1  -4   4   25.12    3.22
  -2   4  -4   19.51    2.35
   2  -4   4   18.80    2.07
   2  -4   4   21.28    3.16
  -3   4  -4  121.95    5.37
  -3   4  -4  112.18    3.97
   3  -4   4  123.12    4.56
   3  -4   4  122.48    5.88
  -4   4  -4    4.47    1.21
  -4   4  -4    4.08    1.46
   4  -4   4   -1.07    2.46
   4  -4   4    3.61    1.48
  -5   4  -4  133.69    5.00
  -5   4  -4  134.89    4.26
   5  -4   4  138.37    6.58
   5  -4   4  143.43    5.50
  -6   4  -4    8.45    1.66
  -6   4  -4    5.60    1.92
   6  -4   4    7.89    3.31
   6  -4   4    8.58    2.11
  -7   4  -4   55.44    3.42
  -7   4  -4   58.13    4.07
  -8   4  -4   12.73    2.36
  -8  -3   4    1.44    1.71
  -7  -3   4    3.69    1.61
  -6  -3   4   62.18    3.04
  -5  -3   4    1.14    1.07
   4   3  -4  234.82    7.24
  -4  -3   4  239.75    5.43
   3   3  -4    9.77    1.83
  -3  -3   4   10.64    1.93
  -3  -3   4    7.54    1.02
   2   3  -4  170.23    5.77
  -2  -3   4  174.99    6.10
   1   3  -4  226.57    7.01
  -1  -3   4  233.33    7.49
   0   3  -4   17.63    2.08
   0  -3   4   18.86    2.60
  -1   3  -4  497.64   12.83
   1  -3   4  506.33   13.48
  -2   3  -4    0.97    1.48
   2  -3   4    3.03    2.03
   2  -3   4    1.88    1.01
  -3   3  -4  239.42    6.23
  -3   3  -4  259.24    7.99
   3  -3   4  251.80    8.54
   3  -3   4  247.55    6.76
  -4   3  -4    0.34    0.87
  -4   3  -4    0.74    1.13
   4  -3   4    1.38    1.13
   4  -3   4    1.27    2.23
  -5   3  -4    7.54    1.75
  -5   3  -4    5.53    1.37
   5  -3   4    8.62    1.65
   5  -3   4   10.75    2.97
  -6   3  -4    5.52    1.58
  -6   3  -4    6.69    1.90
  -7   3  -4   13.12    2.51
  -7   3  -4   12.40    2.07
  -8   3  -4    4.89    2.00
  -8  -2   4   58.76    3.75
  -7  -2   4   -0.03    1.40
  -6  -2   4  123.14    4.31
  -5  -2   4   16.25    1.65
  -4  -2   4   15.21    1.37
   3   2  -4   75.25    3.43
  -3  -2   4   70.04    2.45
   2   2  -4   19.08    2.12
  -2  -2   4   22.41    2.31
   1   2  -4   75.40    3.45
  -1  -2   4   72.44    3.78
   0   2  -4   72.94    3.41
   0  -2   4   72.80    3.95
  -1   2  -4   65.00    3.54
   1  -2   4   65.90    3.87
  -2   2  -4   67.95    3.79
   2  -2   4   69.69    4.09
   2  -2   4   72.44    2.90
  -3   2  -4   28.87    2.16
  -3   2  -4   24.57    2.78
   3  -2   4   29.64    2.10
   3  -2   4   30.92    3.28
  -4   2  -4    2.43    1.06
   4  -2   4    3.06    1.13
   4  -2   4    2.15    2.19
  -5   2  -4   84.53    3.21
  -5   2  -4   89.35    3.98
   5  -2   4   86.24    3.74
   5  -2   4   83.27    5.49
  -6   2  -4    7.81    1.90
  -6   2  -4    5.69    1.54
  -7   2  -4   13.26    2.10
  -7   2  -4   14.11    2.59
  -8   2  -4    8.85    2.10
  -9  -1   4    2.55    2.00
  -8  -1   4    5.66    1.90
  -7  -1   4    5.97    1.67
  -6  -1   4    2.21    1.16
  -6  -1   4    2.11    1.16
  -5  -1   4    2.47    0.99
  -4  -1   4   82.10    2.85
   3   1  -4   12.31    1.65
  -3  -1   4    8.66    1.00
   2   1  -4  248.94    7.01
  -2  -1   4  240.99    7.14
   1   1  -4    1.44    1.18
  -1  -1   4    1.34    1.56
   0   1  -4    3.20    1.46
   0  -1   4    2.73    1.74
   1  -1   4    6.20    1.95
  -2   1  -4  138.27    3.88
  -2   1  -4  133.33    5.27
   2  -1   4  142.44    5.88
  -3   1  -4   18.41    2.19
  -3   1  -4   15.81    1.59
   3  -1   4   21.92    3.22
  -4   1  -4  127.83    3.70
  -4   1  -4  125.75    4.29
   4  -1   4  131.20    6.27
   4  -1   4  128.52    4.06
  -5   1  -4    3.80    1.15
  -5   1  -4    3.94    1.39
   5  -1   4    7.76    2.80
  -6   1  -4   58.20    3.66
  -6   1  -4   54.23    3.00
   6  -1   4   52.06    4.87
  -7   1  -4   11.02    1.98
  -7   1  -4   10.59    2.36
  -8   1  -4    2.34    1.83
  -9   0   4    2.56    1.95
  -8   0   4   -0.52    1.56
  -8   0   4    0.50    1.57
  -7   0   4    8.02    1.72
  -7   0   4    8.08    1.76
  -6   0   4   19.52    1.97
  -6   0   4   17.52    1.74
  -5   0   4   51.30    2.35
  -5   0   4   51.16    2.52
  -4   0   4    0.22    0.84
   3   0  -4  195.04    6.14
  -3   0   4  197.07    4.36
   2   0  -4  157.52    5.39
  -2   0   4  161.31    5.12
   1   0  -4  282.89    8.23
  -1   0   4  286.56    8.29
   0   0  -4  375.13   10.12
   0   0   4  364.51   10.44
  -1   0  -4   14.37    2.09
   1   0   4   18.25    2.60
  -2   0  -4  404.01    8.11
  -2   0  -4  400.21   11.00
   2   0   4  409.84   11.91
  -3   0  -4    0.86    1.01
  -3   0  -4    1.13    1.22
  -3   0  -4    0.96    0.80
   3   0   4    1.26    2.00
  -4   0  -4   49.91    2.32
  -4   0  -4   51.93    2.82
   4   0   4   50.91    4.33
  -5   0  -4   24.59    2.30
  -5   0  -4   25.76    1.95
   5   0   4   30.21    3.92
  -6   0  -4    1.54    1.33
  -6   0  -4    2.20    1.66
  -7   0  -4    7.23    1.86
  -7   0  -4    8.54    2.17
  -8   0  -4   11.63    2.38
  -9   1   4   18.58    2.68
  -8   1   4    1.12    1.58
  -8   1   4    2.68    1.68
  -7   1   4  116.15    4.29
  -7   1   4  114.82    4.45
  -6   1   4    5.37    1.34
  -6   1   4    8.23    1.50
  -5   1   4  114.87    3.64
  -5   1   4  108.86    3.41
  -4   1   4   80.24    2.73
  -4   1   4   82.87    2.64
   3  -1  -4   24.76    2.57
   2  -1  -4  166.32    5.88
  -2   1   4  175.63    5.49
   1  -1  -4  113.14    4.70
  -1   1   4  118.79    4.66
   0  -1  -4   57.58    3.43
   0   1   4   55.23    3.58
  -1  -1  -4  176.42    6.17
  -1  -1  -4  188.54    4.15
   1   1   4  175.36    6.74
  -2  -1  -4    4.05    1.53
  -2  -1  -4    3.15    0.95
   2   1   4    3.45    2.03
  -3  -1  -4   12.96    1.49
  -3  -1  -4   12.39    1.17
   3   1   4   16.46    2.90
  -4  -1  -4   35.10    1.97
  -4  -1  -4   36.21    2.45
   4   1   4   31.07    3.91
  -5  -1  -4   11.35    1.49
  -5  -1  -4   11.70    1.79
   5   1   4   12.69    3.10
  -6  -1  -4   47.10    2.78
  -6  -1  -4   52.68    3.47
   6   1   4   42.01    4.57
  -7  -1  -4   12.09    2.53
  -7  -1  -4   13.31    2.15
  -8  -1  -4    7.39    2.14
  -9   2   4   14.20    2.51
  -8   2   4    2.77    1.66
  -8   2   4    1.45    1.57
  -7   2   4    2.78    1.45
  -7   2   4    6.37    1.66
  -6   2   4   -0.67    1.12
  -6   2   4   -2.24    0.87
  -5   2   4   46.79    2.25
  -5   2   4   47.01    2.30
  -4   2   4   21.61    1.56
  -4   2   4   22.92    1.67
   3  -2  -4  337.89    9.43
  -3   2   4  326.44    6.33
   2  -2  -4   39.37    2.98
  -2   2   4   37.31    2.82
   1  -2  -4  104.42    4.58
  -1   2   4  103.94    4.60
   0  -2  -4    1.37    1.35
   0  -2  -4    0.55    0.55
   0   2   4    1.18    1.61
  -1  -2  -4   11.81    1.06
  -1  -2  -4   15.78    2.27
   1   2   4   12.84    2.47
  -2  -2  -4   22.27    1.60
   2   2   4   24.24    3.20
  -3  -2  -4  107.92    2.88
  -3  -2  -4  107.35    3.63
   3   2   4  105.87    5.73
  -4  -2  -4   12.88    1.75
  -4  -2  -4   12.23    1.36
   4   2   4   16.04    3.30
  -5  -2  -4  107.51    4.28
  -5  -2  -4  104.14    3.49
   5   2   4  112.44    6.26
  -6  -2  -4    5.32    1.89
  -6  -2  -4    5.54    1.61
   6   2   4    7.31    3.28
  -7  -2  -4   37.22    2.90
  -9   3   4   -0.86    1.88
  -8   3   4   -0.77    1.45
  -8   3   4    0.34    1.55
  -7   3   4   20.29    2.15
  -7   3   4   16.19    2.01
  -6   3   4   30.00    2.26
  -6   3   4   33.43    2.34
  -5   3   4   13.27    1.49
  -5   3   4   11.12    1.40
  -4   3   4   75.39    2.66
  -4   3   4   77.82    2.58
   3  -3  -4   28.79    3.04
  -3   3   4   33.32    1.69
   2  -3  -4   88.99    4.52
  -2   3   4   90.04    4.32
   1  -3  -4  164.86    6.29
  -1   3   4  167.95    6.34
   0  -3  -4   15.67    0.93
   0  -3  -4   15.23    2.38
   0   3   4   17.72    2.76
  -1  -3  -4  647.28   11.02
   1   3   4  612.57   17.03
  -2  -3  -4    2.61    0.71
  -2  -3  -4    0.02    2.24
  -2  -3  -4    2.54    0.96
   2   3   4    4.26    2.36
  -3  -3  -4  193.65    4.13
  -3  -3  -4  213.05    7.73
  -3  -3  -4  198.94    5.25
   3   3   4  201.46    8.34
  -4  -3  -4   20.37    2.02
  -4  -3  -4   22.36    1.70
   4   3   4   29.16    4.10
  -5  -3  -4    5.94    1.36
  -5  -3  -4    3.81    1.64
   5   3   4   10.41    3.45
  -6  -3  -4   15.79    2.39
   6   3   4   14.74    4.07
   7   3   4    2.85    3.59
   9  -4  -4    1.22    2.70
   8  -4  -4   33.36    4.08
  -8   4   4   34.22    2.87
  -8   4   4   36.70    2.86
  -7   4   4    0.16    1.30
  -7   4   4   -1.17    1.27
  -6   4   4   65.70    2.95
  -6   4   4   62.41    3.02
   5  -4  -4    7.81    2.52
  -5   4   4   13.00    1.43
  -5   4   4   11.87    1.50
   3  -4  -4  125.47    7.17
  -3   4   4  130.82    3.26
   2  -4  -4    0.35    2.62
  -2   4   4    1.37    1.70
   1  -4  -4  150.75    7.69
  -1   4   4  135.11    6.10
   0  -4  -4    0.19    2.70
   0   4   4    2.20    2.13
  -1  -4  -4   12.60    1.10
   1   4   4   10.21    2.91
  -2  -4  -4   18.67    1.71
  -2  -4  -4   10.66    2.97
   2   4   4   21.83    3.56
  -3  -4  -4   19.35    1.91
   3   4   4   19.95    3.75
  -4  -4  -4    4.14    1.44
   4   4   4    2.55    2.90
  -5  -4  -4   58.29    3.48
   5   4   4   66.39    5.88
   6   4   4    4.20    3.73
   7   4   4   13.30    4.53
   8  -5  -4    9.93    3.12
   7  -5  -4    0.54    2.29
  -7   5   4    0.24    1.30
  -6   5   4    0.66    1.10
   5  -5  -4   -0.93    2.75
  -5   5   4    3.56    1.22
  -5   5   4    2.66    1.11
   4  -5  -4   38.39    4.37
  -4   5   4   30.63    1.80
   3  -5  -4    0.49    2.80
  -3   5   4   11.62    1.13
  -2   5   4   63.59    4.36
  -2   5   4   65.00    2.03
   1  -5  -4    0.53    2.78
  -1   5   4    1.13    2.11
   0   5   4   25.23    3.73
  -1  -5  -4   24.55    4.14
   1   5   4   34.20    4.34
  -2  -5  -4    4.52    3.21
   2   5   4   25.45    4.25
   3   5   4    4.98    3.23
   4   5   4   49.98    5.53
   5   5   4    3.61    3.71
   6   5   4   20.11    4.97
   8  -6  -4    1.36    2.67
   7  -6  -4    5.24    2.72
   6  -6  -4   14.41    2.93
   5  -6  -4    1.17    3.71
   4  -6  -4    1.53    3.56
   3  -6  -4   22.30    4.64
   2  -6  -4   17.29    4.37
  -2   6   4   15.16    2.99
   1  -6  -4   22.40    4.72
   1  -6  -4   16.01    2.13
  -1   6   4   18.47    3.35
   0  -6  -4  186.14    9.23
   0  -6  -4  163.70    5.37
   0   6   4  167.50    8.06
  -1  -6  -4    0.06    3.48
   1   6   4    3.79    3.18
  -2  -6  -4  125.14    8.43
   2   6   4  145.43    8.10
   3   6   4    7.50    3.86
   4   6   4   35.72    5.74
   5   6   4   17.55    4.85
   6   6   4    0.55    3.93
   7  -7  -4   46.44    4.86
   6  -7  -4    3.23    2.68
   6  -7  -4   -1.43    4.03
   5  -7  -4   33.52    3.89
   5  -7  -4    2.86    4.24
   4  -7  -4   41.20    4.07
   3  -7  -4    0.59    1.82
   3  -7  -4    2.52    4.51
   2  -7  -4   75.60    7.44
   2  -7  -4   78.25    4.44
   1  -7  -4    7.96    4.59
   1  -7  -4    3.69    1.57
  -1   7   4    4.86    2.88
   0  -7  -4   53.19    6.73
   0   7   4   49.03    5.32
  -1  -7  -4    9.52    4.74
   1   7   4    6.99    3.66
  -2  -7  -4    2.22    4.46
   2   7   4    4.32    3.84
   3   7   4   -3.86    3.45
   4   7   4   20.34    5.17
   5   7   4    3.81    4.24
   7  -8  -4    0.38    2.71
   6  -8  -4   -2.79    4.62
   6  -8  -4    4.57    2.80
   5  -8  -4    1.51    4.60
   5  -8  -4    9.79    2.99
   4  -8  -4    5.95    5.61
   4  -8  -4    9.07    2.73
   3  -8  -4   43.23    3.93
   3  -8  -4   27.57    6.84
   2  -8  -4    3.35    1.89
   2  -8  -4    5.25    5.07
   1  -8  -4    9.55    5.42
   1  -8  -4   17.52    2.40
  -1   8   4   13.76    3.87
   0  -8  -4   -0.41    4.63
   0   8   4    5.17    3.66
  -1  -8  -4   -0.83    5.08
   1   8   4    2.17    3.90
   2   8   4   19.81    5.50
   3   8   4   10.25    5.03
   4   8   4    1.26    4.41
   6  -9  -4    2.19    2.93
   5  -9  -4    3.04    2.75
   5  -9  -4   -2.39    5.02
   4  -9  -4    9.16    2.82
   4  -9  -4    0.54    5.42
   3  -9  -4   -2.20    5.91
   3  -9  -4   -0.93    2.11
   2  -9  -4    0.91    2.02
   2  -9  -4    3.90    5.74
   1  -9  -4    4.80    5.51
   0  -9  -4   -2.24    5.03
   0   9   4   -0.28    3.79
   1   9   4   55.73    6.87
   2   9   4   -1.75    4.38
   3   9   4   28.78    6.45
   5 -10  -4    6.40    3.18
   4 -10  -4    7.63    3.05
   3 -10  -4   13.66    6.17
   3 -10  -4   23.43    3.50
   2 -10  -4    3.92    5.93
   1 -10  -4   16.23    7.34
   0 -10  -4   -0.47    5.83
   0  10   4   -2.74    3.95
   1  10   4    2.14    4.83
   2  10   4   -2.63    4.59
   0 -12   5    1.92    5.98
   2  11  -5   36.66    6.02
   1  11  -5    0.08    3.76
   0  11  -5   11.89    4.33
   0 -11   5    5.09    5.79
   1 -11   5    0.37    5.55
   2 -11   5    5.11    5.45
   4 -11   5   11.56    3.60
   4  10  -5    2.83    3.62
   3  10  -5   10.91    4.31
   2  10  -5    2.82    3.73
   1  10  -5    3.04    3.52
  -1 -10   5    3.73    5.49
   0  10  -5   45.40    5.36
   0 -10   5   21.10    6.21
  -1  10  -5    0.32    3.19
   1 -10   5    4.18    5.34
   2 -10   5   10.59    5.42
   3 -10   5    4.25    4.67
   3 -10   5    6.05    2.80
   4 -10   5   -1.17    4.04
   4 -10   5    0.74    2.47
   5 -10   5    0.13    2.79
   5   9  -5    2.34    3.21
   4   9  -5    2.35    3.19
   3   9  -5   13.06    3.90
   2   9  -5    4.84    3.34
   1   9  -5   45.15    5.04
  -1  -9   5   37.57    6.61
   0   9  -5    0.49    2.84
   0  -9   5   -3.07    4.59
  -1   9  -5   84.61    6.11
   1  -9   5   85.65    7.62
   2  -9   5   13.95    5.08
   2  -9   5   15.47    2.96
   3  -9   5    7.45    4.55
   3  -9   5   19.57    3.30
   4  -9   5   55.39    4.86
  -5   9  -5   -0.26    1.43
   5  -9   5    0.40    2.40
   5  -9   5    0.24    4.24
   6  -9   5   23.64    4.02
   6   8  -5    8.10    3.34
   5   8  -5   47.74    5.07
   4   8  -5    6.11    3.24
   3   8  -5  150.31    7.67
   2   8  -5    1.03    2.69
  -2  -8   5    2.59    3.71
   1   8  -5   70.31    5.41
  -1  -8   5   73.44    6.47
   0   8  -5   21.13    3.79
   0  -8   5   14.30    4.90
  -1   8  -5    4.19    2.81
   1  -8   5    0.20    3.96
   2  -8   5   22.76    5.08
   2  -8   5   19.95    2.86
  -3   8  -5   12.09    1.62
   3  -8   5   11.01    4.30
   3  -8   5   14.87    2.79
  -4   8  -5    3.56    1.48
  -4   8  -5    6.38    1.81
   4  -8   5    5.11    4.07
   4  -8   5    4.72    2.39
  -5   8  -5   15.76    2.05
  -5   8  -5   23.40    2.77
   5  -8   5   19.19    5.26
   5  -8   5   20.89    3.46
  -6   8  -5    1.71    1.59
   6  -8   5    0.74    4.34
   6  -8   5    3.02    2.59
   7  -8   5    0.02    2.96
   6   7  -5    5.55    2.94
   5   7  -5   16.60    3.43
  -5  -7   5   18.48    2.01
   4   7  -5   22.63    3.72
  -4  -7   5   22.15    1.90
   3   7  -5    2.13    2.35
  -3  -7   5    1.33    0.97
   2   7  -5    7.75    2.74
  -2  -7   5    9.33    3.50
   1   7  -5   18.67    3.29
  -1  -7   5   16.12    4.10
   0   7  -5    1.80    2.25
   0  -7   5   -2.55    3.33
  -1   7  -5   77.94    5.11
   1  -7   5   78.20    6.23
  -2   7  -5    8.79    2.78
   2  -7   5    7.26    1.90
   2  -7   5    7.10    3.77
  -3   7  -5   37.82    2.22
   3  -7   5   31.57    4.91
   3  -7   5   38.32    3.58
  -4   7  -5    0.26    1.18
  -4   7  -5    0.79    1.45
   4  -7   5    1.22    3.45
   4  -7   5   -1.38    1.76
  -5   7  -5    2.50    1.42
  -5   7  -5    2.47    1.77
   5  -7   5    3.25    4.05
   5  -7   5    0.98    2.17
  -6   7  -5    0.50    1.49
  -6   7  -5    1.52    1.77
   6  -7   5   -1.23    2.33
   6  -7   5   -1.49    3.79
  -7   7  -5   11.70    2.22
   7  -7   5   16.97    3.56
  -8  -6   5   16.89    2.60
  -7  -6   5    3.75    1.83
   6   6  -5   32.11    3.95
  -6  -6   5   24.28    2.40
   5   6  -5   -0.37    2.14
  -5  -6   5   -1.00    1.19
   4   6  -5    2.17    2.25
  -4  -6   5    1.77    1.10
   3   6  -5    4.93    2.27
   2   6  -5   32.87    3.57
  -2  -6   5   36.42    1.81
  -2  -6   5   36.23    4.25
   1   6  -5    2.13    2.01
  -1  -6   5    3.47    2.83
   0   6  -5  120.42    5.81
   0  -6   5  106.46    6.38
  -1   6  -5    3.72    2.15
   1  -6   5    3.48    3.04
  -2   6  -5   60.94    4.40
   2  -6   5   61.83    3.84
   2  -6   5   62.48    5.39
   3  -6   5   57.32    3.70
   3  -6   5   52.76    5.20
  -4   6  -5   20.95    2.33
  -4   6  -5   19.93    1.90
   4  -6   5   20.29    2.73
   4  -6   5   24.01    4.40
  -5   6  -5   83.52    4.25
  -5   6  -5   90.06    3.69
   5  -6   5   84.50    6.45
   5  -6   5   85.27    5.05
  -6   6  -5    2.36    1.60
  -6   6  -5    1.66    1.73
   6  -6   5    2.49    2.23
   6  -6   5   -0.80    3.47
  -7   6  -5   25.89    2.74
  -8  -5   5   -0.75    1.63
  -7  -5   5   26.15    2.54
   6   5  -5   26.93    3.41
  -6  -5   5   21.75    2.18
   5   5  -5   10.87    2.57
  -5  -5   5   10.13    1.61
   4   5  -5  151.45    6.41
  -4  -5   5  150.97    4.26
   3   5  -5    1.04    1.80
  -3  -5   5    0.94    0.92
   2   5  -5  173.81    6.82
  -2  -5   5  183.88    7.34
   1   5  -5   39.45    3.52
  -1  -5   5   37.78    3.99
   0   5  -5   52.37    3.85
   0  -5   5   51.58    4.42
   1  -5   5  106.09    5.88
  -2   5  -5    0.53    1.66
   2  -5   5   -0.02    1.11
   2  -5   5    0.68    2.45
   3  -5   5   48.39    3.21
   3  -5   5   49.06    4.72
  -4   5  -5   32.36    2.24
  -4   5  -5   29.49    2.64
   4  -5   5   32.77    3.08
   4  -5   5   24.73    4.29
  -5   5  -5   10.66    2.09
  -5   5  -5    9.68    1.68
   5  -5   5   10.77    3.72
   5  -5   5   11.05    2.29
  -6   5  -5   16.72    2.51
  -6   5  -5   13.45    2.08
   6  -5   5   11.50    4.01
   6  -5   5   19.10    2.96
  -7   5  -5    2.98    1.75
  -8  -4   5   18.40    2.61
  -7  -4   5   -0.93    1.39
   6   4  -5   67.68    4.24
  -6  -4   5   67.06    3.38
   5   4  -5    0.12    1.71
  -5  -4   5    1.61    1.15
   4   4  -5   25.11    2.97
  -4  -4   5   24.63    1.89
   3   4  -5   23.42    2.80
   2   4  -5   18.55    2.48
  -2  -4   5   17.22    2.89
   1   4  -5    0.87    1.51
  -1  -4   5    1.77    2.08
   0   4  -5  228.39    7.71
   0  -4   5  232.25    8.23
  -1   4  -5   54.28    3.62
   1  -4   5   52.31    4.15
  -2   4  -5  165.39    6.48
   2  -4   5  162.99    5.46
   2  -4   5  174.55    7.32
   3  -4   5    3.99    2.67
   3  -4   5    3.14    1.28
  -4   4  -5    2.22    1.52
  -4   4  -5    0.17    0.99
   4  -4   5    2.72    2.80
   4  -4   5    0.76    1.34
  -5   4  -5    3.95    1.33
  -5   4  -5    4.09    1.61
   5  -4   5    2.52    3.12
   5  -4   5    2.48    1.61
  -6   4  -5   16.73    2.17
  -6   4  -5   18.28    2.57
   6  -4   5   16.14    4.29
  -7   4  -5   -1.00    1.51
  -8  -3   5    4.02    1.85
  -7  -3   5   33.85    2.82
  -6  -3   5    2.71    1.30
   5   3  -5    9.35    2.08
  -5  -3   5    7.42    1.44
   4   3  -5   30.78    2.94
  -4  -3   5   28.71    1.87
   3   3  -5   29.30    2.85
  -3  -3   5   28.49    1.80
  -3  -3   5   27.37    3.10
   2   3  -5   96.02    4.39
  -2  -3   5   96.63    4.68
   1   3  -5  143.20    5.57
  -1  -3   5  152.22    6.05
   0   3  -5    3.15    1.51
   0  -3   5    4.41    2.07
  -1   3  -5  154.24    5.87
   1  -3   5  148.96    6.39
  -2   3  -5   55.15    3.86
   2  -3   5   56.99    4.30
  -3   3  -5   47.46    3.71
  -3   3  -5   42.12    2.58
   3  -3   5   46.29    4.13
   3  -3   5   45.78    2.92
  -4   3  -5  147.84    5.14
  -4   3  -5  140.80    4.19
   4  -3   5  145.82    5.13
   4  -3   5  139.77    6.76
  -5   3  -5    1.32    1.20
  -5   3  -5    0.41    1.46
   5  -3   5    1.51    1.51
   5  -3   5    0.75    2.81
  -6   3  -5  103.27    4.13
  -6   3  -5  100.70    4.81
   6  -3   5   99.15    6.54
  -7   3  -5    0.25    1.63
  -8   3  -5   13.06    2.51
  -8  -2   5    3.72    1.85
  -7  -2   5   -0.10    1.43
  -6  -2   5    0.84    1.31
  -5  -2   5  122.69    4.04
   4   2  -5   10.46    1.96
  -4  -2   5    6.48    1.24
   3   2  -5  523.41   13.20
  -3  -2   5  492.93   12.98
  -3  -2   5  508.11    9.23
   2   2  -5   74.35    3.71
  -2  -2   5   69.50    4.10
   1   2  -5  245.89    7.61
  -1  -2   5  248.51    8.06
   0   2  -5   63.99    3.69
   0  -2   5   65.49    4.07
  -1   2  -5    1.94    1.60
   1  -2   5    0.95    1.78
  -2   2  -5   88.72    4.56
   2  -2   5   89.76    4.98
  -3   2  -5   19.91    2.01
  -3   2  -5   22.61    2.94
   3  -2   5   23.48    3.51
  -4   2  -5   42.20    2.86
  -4   2  -5   48.37    2.39
   4  -2   5   45.08    4.81
  -5   2  -5    5.48    1.33
  -5   2  -5    5.98    1.66
   5  -2   5    9.18    3.42
  -6   2  -5   -0.13    1.60
  -6   2  -5    0.52    1.41
   6  -2   5   -2.58    2.96
  -7   2  -5    1.90    1.69
  -8   2  -5    9.37    2.30
  -8  -1   5    7.02    1.93
  -7  -1   5   53.02    3.26
  -6  -1   5   12.88    1.79
  -5  -1   5   63.68    2.91
   4   1  -5   13.23    2.12
  -4  -1   5    9.90    1.32
   3   1  -5   47.63    3.16
   2   1  -5    8.20    1.87
  -2  -1   5    9.51    1.95
   1   1  -5   29.23    2.76
  -1  -1   5   27.22    3.00
   0   1  -5   12.86    2.16
   0  -1   5   12.27    2.53
  -1   1  -5  203.79    6.99
   1  -1   5  199.60    7.67
  -2   1  -5    0.46    1.53
  -2   1  -5   -0.04    0.94
   2  -1   5    0.13    2.05
  -3   1  -5   46.73    3.68
  -3   1  -5   53.32    2.87
   3  -1   5   51.81    4.59
  -4   1  -5    5.82    1.20
  -4   1  -5    4.04    1.48
   4  -1   5    8.03    3.24
  -5   1  -5    1.81    1.57
  -5   1  -5    1.26    1.18
   5  -1   5   -1.23    2.68
  -6   1  -5    6.79    1.69
  -6   1  -5    5.49    2.00
   6  -1   5    3.74    3.35
  -7   1  -5   10.74    2.12
  -8   1  -5   -0.20    1.77
  -9   0   5    8.15    2.42
  -8   0   5   15.36    2.32
  -7   0   5   17.04    2.16
  -6   0   5   35.80    2.58
  -5   0   5    7.38    1.41
   4   0  -5    7.90    1.95
  -4   0   5    6.42    1.11
   3   0  -5   95.14    4.46
  -2   0   5   20.12    2.44
   1   0  -5   17.58    2.40
  -1   0   5   16.62    2.36
   0   0  -5  117.56    5.06
   0   0   5  109.22    5.24
  -1   0  -5    0.57    1.54
   1   0   5    0.74    1.82
  -2   0  -5   98.96    4.95
  -2   0  -5  104.99    3.46
   2   0   5  105.87    5.65
  -3   0  -5   91.75    4.59
  -3   0  -5   85.52    3.47
   3   0   5   84.24    5.40
  -4   0  -5    4.18    1.21
  -4   0  -5    4.41    1.47
   4   0   5    7.30    3.03
  -5   0  -5  179.10    4.92
  -5   0  -5  165.59    5.69
   5   0   5  165.42    7.88
  -6   0  -5    0.17    1.71
  -6   0  -5    2.48    1.50
   6   0   5    3.14    3.09
  -7   0  -5   44.35    3.20
  -8   0  -5    6.87    2.17
  -9   1   5    3.86    2.04
  -8   1   5    0.00    1.58
  -7   1   5    6.29    1.71
  -6   1   5   41.42    2.71
  -5   1   5    0.95    1.04
   4  -1  -5  152.41    5.80
  -4   1   5  160.29    4.22
   3  -1  -5    5.36    1.89
   2  -1  -5  261.43    8.43
  -2   1   5  269.43    8.03
   1  -1  -5  110.39    4.93
  -1   1   5   98.12    4.70
   0  -1  -5  124.49    5.45
   0   1   5  131.05    5.73
  -1  -1  -5  464.16    8.89
  -1  -1  -5  464.63   12.95
   1   1   5  469.38   13.63
  -2  -1  -5    1.37    0.96
  -2  -1  -5    0.16    1.43
   2   1   5    1.93    2.14
  -3  -1  -5  141.60    4.38
  -3  -1  -5  141.46    3.68
   3   1   5  135.96    6.80
  -4  -1  -5   15.63    1.80
  -4  -1  -5   14.50    1.55
   4   1   5   14.19    3.43
  -5  -1  -5    6.27    1.70
  -5  -1  -5    5.58    1.52
   5   1   5    6.02    3.19
  -6  -1  -5    9.75    1.82
  -6  -1  -5   11.00    2.15
   6   1   5   12.03    3.89
  -7  -1  -5    1.90    1.70
  -8  -1  -5    2.49    2.03
  -9   2   5    1.11    1.91
  -8   2   5   29.29    2.75
  -7   2   5    2.17    1.46
  -6   2   5   96.27    3.81
  -5   2   5    1.17    1.13
   4  -2  -5   98.30    4.65
  -4   2   5   93.96    3.16
   3  -2  -5   11.95    2.34
   2  -2  -5   16.86    2.51
  -2   2   5   10.24    2.07
   1  -2  -5   39.56    3.37
  -1   2   5   38.28    3.44
   0  -2  -5  222.72    7.87
   0  -2  -5  233.07    4.71
   0   2   5  224.62    8.22
  -1  -2  -5   28.18    3.19
  -1  -2  -5   24.20    1.61
   1   2   5   27.90    3.57
  -2  -2  -5  157.01    4.18
   2   2   5  144.74    7.00
  -3  -2  -5    0.66    1.07
  -3  -2  -5   -0.28    2.73
  -3  -2  -5   -0.98    0.83
   3   2   5   -0.79    2.28
  -4  -2  -5    9.46    1.72
  -4  -2  -5    9.16    1.29
   4   2   5   12.13    3.50
  -5  -2  -5   19.34    1.92
  -5  -2  -5   14.84    2.18
   5   2   5   17.54    4.05
  -6  -2  -5   12.81    1.99
  -6  -2  -5    7.28    2.12
   6   2   5   12.22    4.10
   7   2   5   10.11    4.22
   9  -3  -5    4.60    3.07
  -8   3   5    9.58    2.18
  -7   3   5   20.39    2.29
  -6   3   5    0.92    1.29
  -5   3   5    0.71    1.11
   4  -3  -5   33.80    3.41
  -4   3   5   32.75    1.95
   3  -3  -5   16.82    2.68
  -3   3   5   18.33    1.45
   2  -3  -5   86.23    4.80
  -2   3   5   90.52    4.66
   1  -3  -5   20.54    2.91
  -1   3   5   13.99    2.64
   0  -3  -5   57.03    4.24
   0  -3  -5   62.67    1.87
   0   3   5   58.99    4.56
  -1  -3  -5   31.61    1.69
   1   3   5   33.50    4.11
  -2  -3  -5   19.60    4.00
  -2  -3  -5   24.12    1.42
  -2  -3  -5   25.53    1.82
   2   3   5   25.03    3.89
  -3  -3  -5    9.65    1.19
  -3  -3  -5    6.86    1.45
   3   3   5    9.91    3.37
  -4  -3  -5  131.75    3.71
  -4  -3  -5  132.32    4.65
   4   3   5  128.27    7.43
  -5  -3  -5    1.37    1.59
   5   3   5    1.34    3.35
  -6  -3  -5   60.31    4.02
   6   3   5   60.46    6.20
   7   3   5    5.15    4.13
  -8   4   5    0.91    1.78
  -7   4   5    0.98    1.37
  -6   4   5    0.87    1.24
  -4   4   5    0.58    0.89
  -3   4   5  208.91    4.67
  -2   4   5   21.29    3.00
  -1   4   5  117.99    6.04
   0   4   5  108.09    6.19
  -1  -4  -5   11.27    1.15
  -1  -4  -5    2.36    3.13
   1   4   5    9.88    3.21
  -2  -4  -5   92.53    3.22
   2   4   5   91.69    6.34
  -3  -4  -5    4.23    1.35
   3   4   5    2.69    3.13
  -4  -4  -5   47.65    3.14
   4   4   5   48.67    5.55
  -5  -4  -5    3.36    1.73
   5   4   5    1.28    3.69
   6   4   5    1.20    3.94
   8  -5  -5    4.33    2.85
   6  -5  -5    0.59    3.24
   5  -5  -5   61.14    5.18
   4  -5  -5   -0.45    3.15
   3  -5  -5    0.49    3.48
   2  -5  -5   -2.18    3.14
  -2   5   5    9.63    2.74
   1  -5  -5    2.98    3.38
  -1   5   5    3.16    2.56
  -2  -5  -5    5.04    3.47
   2   5   5    4.98    3.45
   3   5   5   37.81    5.60
   4   5   5   21.91    5.05
   5   5   5    3.33    4.17
   6   5   5   10.75    4.79
   8  -6  -5    6.60    3.19
   7  -6  -5    8.90    3.13
   6  -6  -5    2.31    3.99
   5  -6  -5    2.43    3.62
   4  -6  -5   -2.06    3.33
   2  -6  -5   -0.16    3.32
  -1   6   5   38.40    4.66
   0  -6  -5   31.12    5.21
   0   6   5   23.36    4.46
  -1  -6  -5    1.00    3.78
   1   6   5    5.66    3.67
  -2  -6  -5    1.45    3.90
   2   6   5    0.11    3.50
   3   6   5   16.65    5.00
   4   6   5    2.28    4.22
   5   6   5   38.91    6.43
   7  -7  -5    1.72    2.85
   6  -7  -5    0.71    4.49
   6  -7  -5    8.78    3.20
   5  -7  -5   -1.23    4.02
   5  -7  -5    4.58    2.73
   3  -7  -5   -1.29    4.58
   3  -7  -5    4.55    2.23
   2  -7  -5   22.98    5.90
   2  -7  -5   45.35    3.88
   1  -7  -5   20.23    5.68
   1  -7  -5   30.39    3.08
  -1   7   5   27.28    4.56
   0  -7  -5    7.45    4.77
   0   7   5   17.46    4.43
  -1  -7  -5   97.22    8.50
   1   7   5  114.99    8.00
   2   7   5    2.58    4.18
   3   7   5   69.68    7.33
   4   7   5   -0.26    4.24
   6  -8  -5   29.07    4.32
   5  -8  -5    4.94    2.91
   5  -8  -5   -3.41    4.86
   4  -8  -5   29.16    3.87
   4  -8  -5    2.70    5.04
   3  -8  -5    3.34    5.60
   3  -8  -5   12.35    2.82
   2  -8  -5   -0.74    1.72
   2  -8  -5   -2.25    5.19
   1  -8  -5    7.22    5.54
  -1   8   5   10.45    4.03
   0  -8  -5   24.43    6.55
   0   8   5   26.61    5.39
  -1  -8  -5    5.10    5.45
   1   8   5   13.36    5.12
   2   8   5   13.06    5.55
   3   8   5   -1.88    4.63
   5  -9  -5   -0.77    2.70
   4  -9  -5    3.48    2.65
   4  -9  -5   -1.75    5.48
   3  -9  -5    2.44    2.45
   3  -9  -5   -1.76    7.05
   2  -9  -5    5.04    6.16
   1  -9  -5   -2.35    5.23
   0  -9  -5    3.44    5.96
   0   9   5    4.50    4.41
  -1  -9  -5    5.02    5.94
   1   9   5   -0.78    4.54
   2   9   5    3.70    5.09
   4 -10  -5    3.07    2.99
   1 -10  -5    4.81    6.04
   0 -10  -5    5.57    6.18
   1  10   5   -0.97    4.88
   2  11  -6   12.54    4.83
   1  11  -6   33.63    5.84
   0  11  -6    8.21    4.27
   0 -11   6    2.65    6.04
   1 -11   6   24.64    6.90
   2 -11   6    1.41    5.13
   4  10  -6    7.69    4.02
   3  10  -6   23.02    5.08
   2  10  -6    0.92    3.61
   1  10  -6   19.44    4.65
  -1 -10   6    9.24    6.01
   0  10  -6    2.49    3.62
   0 -10   6    5.16    5.67
   1 -10   6    1.08    5.18
   2 -10   6   -4.00    4.44
   3 -10   6    5.01    4.66
   5   9  -6    4.44    3.61
   4   9  -6   22.55    4.62
   3   9  -6    6.10    3.58
   2   9  -6   24.70    4.73
   1   9  -6   12.59    3.91
  -1  -9   6   14.81    5.55
   0   9  -6    0.52    3.04
   0  -9   6    2.92    4.99
  -1   9  -6   26.04    4.55
   1  -9   6   14.93    5.51
   2  -9   6    8.99    4.86
  -3   9  -6    8.31    1.55
   3  -9   6    6.21    4.46
  -4   9  -6   24.75    2.80
  -4   9  -6   20.10    2.19
   4  -9   6   15.02    5.07
   4  -9   6   24.13    3.63
  -5   9  -6    0.56    1.53
   5  -9   6   -0.27    4.38
   5  -9   6    1.12    2.81
  -6   9  -6    7.90    2.07
   6  -9   6    7.65    3.39
   6   8  -6    9.64    3.53
   5   8  -6    8.32    3.57
   4   8  -6   -1.10    2.74
   3   8  -6   29.19    4.45
   2   8  -6   27.39    4.45
   1   8  -6    1.83    2.70
  -1  -8   6   -1.34    3.76
   0   8  -6  109.12    6.61
   0  -8   6  119.10    7.97
  -1   8  -6    0.91    2.65
   1  -8   6    1.39    4.12
   2  -8   6   86.54    7.16
  -3   8  -6   19.39    1.89
   3  -8   6   16.81    4.78
  -4   8  -6   16.36    2.42
  -4   8  -6   22.56    2.19
   4  -8   6   21.80    3.24
   4  -8   6   17.85    5.04
  -5   8  -6   20.78    2.81
  -5   8  -6   23.01    2.32
   5  -8   6   18.48    5.23
   5  -8   6   23.73    3.72
  -6   8  -6   -1.37    1.58
   6  -8   6    1.17    2.74
   6   7  -6    1.39    2.63
  -6  -7   6    1.61    1.47
   5   7  -6   22.03    3.89
  -5  -7   6   16.79    2.01
   4   7  -6   58.98    5.05
  -4  -7   6   57.82    2.72
   3   7  -6    4.17    2.74
  -3  -7   6    5.24    1.22
   2   7  -6  121.82    6.62
  -2  -7   6  128.21    7.29
  -2  -7   6  124.72    3.48
   1   7  -6    0.41    2.37
  -1  -7   6    1.21    3.23
   0   7  -6   39.31    4.25
   0  -7   6   41.63    5.17
  -1   7  -6   17.69    3.53
   1  -7   6   16.39    4.34
  -2   7  -6   -0.34    2.09
   2  -7   6    4.89    3.60
   3  -7   6    1.04    3.49
   3  -7   6    1.44    1.95
  -4   7  -6   32.54    2.94
  -4   7  -6   33.17    2.57
   4  -7   6   20.58    4.95
   4  -7   6   37.93    3.96
  -5   7  -6    5.62    1.69
  -5   7  -6    5.83    1.97
   5  -7   6    5.93    4.36
   5  -7   6    6.22    2.55
  -6   7  -6   13.56    2.25
   6  -7   6   16.87    3.51
   6  -7   6    9.00    4.58
  -7  -6   6    1.98    1.65
   6   6  -6    3.45    2.59
  -6  -6   6    2.95    1.54
   5   6  -6   33.65    3.98
  -5  -6   6   26.28    2.23
   4   6  -6    4.76    2.61
  -4  -6   6    4.23    1.34
   3   6  -6   93.12    5.52
  -3  -6   6   93.23    3.23
   2   6  -6    1.67    2.17
  -2  -6   6    1.25    2.65
   1   6  -6   28.84    3.71
  -1  -6   6   34.92    4.61
   0   6  -6   10.20    2.75
   0  -6   6   10.00    3.52
  -1   6  -6    5.29    2.41
   1  -6   6    8.88    3.47
  -2   6  -6   32.81    3.78
   2  -6   6   32.47    4.71
   3  -6   6   18.03    2.49
   3  -6   6   12.32    3.92
  -4   6  -6    3.54    1.72
  -4   6  -6    6.34    1.56
   4  -6   6    4.96    2.20
   4  -6   6    5.27    3.60
  -5   6  -6   18.20    2.20
  -5   6  -6   14.52    2.28
   5  -6   6   15.95    2.86
   5  -6   6   13.13    4.40
  -6   6  -6    7.02    1.98
   6  -6   6    7.14    2.61
   6  -6   6    2.26    3.93
  -7   6  -6    9.55    2.28
  -8  -5   6    0.16    1.82
  -7  -5   6   10.99    2.09
   6   5  -6    5.19    2.42
  -6  -5   6    6.12    1.77
   5   5  -6   27.86    3.50
  -5  -5   6   24.34    2.11
   4   5  -6   13.71    2.81
  -4  -5   6    8.91    1.43
   3   5  -6    0.22    1.82
  -3  -5   6    0.89    0.98
   2   5  -6   11.06    2.54
  -2  -5   6    8.62    2.94
   1   5  -6  170.48    7.01
  -1  -5   6  169.44    7.57
   0   5  -6    8.49    2.47
   0  -5   6    9.90    3.08
  -1   5  -6  245.64    8.64
   1  -5   6  243.20    9.58
  -2   5  -6   16.48    2.87
   2  -5   6   14.21    3.57
   3  -5   6   64.60    5.52
  -4   5  -6   23.31    2.10
  -4   5  -6   25.52    2.64
   4  -5   6   25.34    4.49
   4  -5   6   24.76    2.84
  -5   5  -6    1.41    1.42
  -5   5  -6    0.27    1.65
   5  -5   6    0.99    3.45
   5  -5   6    1.37    2.00
  -6   5  -6   33.24    3.31
  -6   5  -6   32.56    2.80
   6  -5   6   23.87    5.02
  -7   5  -6    1.57    1.78
  -8  -4   6   26.34    2.95
  -7  -4   6    1.98    1.60
  -6  -4   6   51.21    3.12
   5   4  -6   98.52    5.15
  -5  -4   6  104.30    3.89
   4   4  -6   24.90    3.12
  -4  -4   6   17.71    1.73
   3   4  -6  167.67    6.69
  -3  -4   6  170.25    4.47
   2   4  -6   -0.39    1.63
  -2  -4   6    0.35    1.97
   1   4  -6   82.04    4.60
  -1  -4   6   80.59    5.02
   0   4  -6    1.63    1.84
   0  -4   6    2.14    2.38
  -1   4  -6   25.73    3.26
   1  -4   6   24.73    3.78
  -2   4  -6   19.39    3.00
   2  -4   6   20.06    3.60
   3  -4   6   27.40    4.12
  -4   4  -6   27.16    2.70
  -4   4  -6   24.93    2.01
   4  -4   6   27.37    4.27
  -5   4  -6   58.55    3.20
  -5   4  -6   55.34    3.80
   5  -4   6   56.96    5.53
  -6   4  -6    0.78    1.36
  -6   4  -6    1.18    1.91
   6  -4   6    0.00    3.88
  -7   4  -6   14.47    2.40
  -8  -3   6    6.82    2.04
  -7  -3   6    9.23    2.01
  -6  -3   6    2.19    1.42
   5   3  -6   31.92    3.18
  -5  -3   6   34.52    2.45
   4   3  -6   45.55    3.54
  -4  -3   6   47.27    2.48
   3   3  -6   22.66    2.84
   2   3  -6   58.62    3.81
  -2  -3   6   61.29    4.23
   1   3  -6   76.29    4.21
  -1  -3   6   77.34    4.68
   0   3  -6    1.77    1.74
   0  -3   6    0.73    1.98
  -1   3  -6  153.96    6.45
   1  -3   6  154.33    6.85
  -2   3  -6   16.91    2.82
   2  -3   6   15.91    3.20
  -3   3  -6   22.32    2.16
   3  -3   6   28.49    4.01
  -4   3  -6   28.33    2.59
  -4   3  -6   32.30    2.21
   4  -3   6   33.82    4.70
  -5   3  -6    1.64    1.76
  -5   3  -6    2.32    1.34
   5  -3   6    0.05    3.41
  -6   3  -6    7.67    2.31
  -6   3  -6    9.15    1.90
   6  -3   6   11.02    4.36
  -7   3  -6   15.62    2.45
  -8  -2   6   14.84    2.43
  -7  -2   6    2.71    1.67
  -6  -2   6   43.65    2.86
   5   2  -6   16.27    2.55
  -5  -2   6   16.91    1.84
   4   2  -6   14.37    2.46
  -4  -2   6   10.56    1.37
   3   2  -6    6.55    2.06
   2   2  -6   41.01    3.38
  -2  -2   6   40.64    3.65
   1   2  -6   -0.69    1.53
  -1  -2   6    0.85    2.00
   0   2  -6  222.99    7.86
   0  -2   6  220.25    8.34
  -1   2  -6    2.43    1.89
   1  -2   6    1.09    2.16
  -2   2  -6  255.67    8.67
   2  -2   6  250.57    9.59
  -3   2  -6   41.24    2.84
   3  -2   6   46.18    4.93
  -4   2  -6   51.11    2.72
  -4   2  -6   48.23    3.24
   4  -2   6   53.43    5.29
  -5   2  -6   87.47    4.43
  -5   2  -6   76.37    3.52
   5  -2   6   85.50    6.38
  -6   2  -6    1.84    1.60
  -6   2  -6    2.20    1.80
   6  -2   6    2.87    3.76
  -7   2  -6   18.05    2.51
  -8  -1   6    2.18    1.78
  -7  -1   6   36.08    2.96
  -6  -1   6    5.97    1.57
  -5  -1   6   19.71    1.91
   4   1  -6  110.36    5.14
  -4  -1   6  112.56    3.74
   3   1  -6   28.45    3.10
   2   1  -6  422.22   12.28
  -2  -1   6  443.07   12.22
   1   1  -6   35.31    3.24
  -1  -1   6   26.15    3.21
   0   1  -6  282.53    9.29
   0  -1   6  298.56    9.97
  -1   1  -6   14.34    2.55
   1  -1   6    0.25    2.17
  -2   1  -6   -0.52    1.68
  -2   1  -6    1.48    1.11
   2  -1   6    1.31    2.43
  -3   1  -6   -0.88    1.13
   3  -1   6   -0.66    2.70
  -4   1  -6   51.34    3.19
  -4   1  -6   46.31    2.64
   4  -1   6   54.00    5.20
  -5   1  -6    9.23    2.04
  -5   1  -6    6.45    1.62
   5  -1   6    5.97    3.54
  -6   1  -6   24.64    3.10
  -6   1  -6   22.86    2.46
   6  -1   6   24.46    4.86
  -7   1  -6    0.63    1.68
  -8   0   6    4.80    1.94
  -7   0   6   11.11    2.01
  -6   0   6   29.58    2.43
   5   0  -6   20.83    2.70
  -5   0   6   21.72    1.99
   4   0  -6   61.88    3.94
  -4   0   6   64.97    2.86
   3   0  -6   88.56    4.71
   2   0  -6    3.98    1.80
  -2   0   6    1.86    1.60
   1   0  -6   11.58    2.36
  -1   0   6    8.91    2.29
   0   0  -6   60.52    4.18
   0   0   6   56.78    4.36
  -1   0  -6   -0.24    1.62
   1   0   6    0.05    2.00
  -2   0  -6   90.26    5.17
  -2   0  -6   89.95    3.50
   2   0   6   92.74    5.76
  -3   0  -6    7.60    1.63
   3   0   6    5.23    2.83
  -4   0  -6   39.79    2.80
  -4   0  -6   40.43    2.43
   4   0   6   39.82    4.89
  -5   0  -6    7.95    1.65
  -5   0  -6    7.27    1.97
   5   0   6    7.65    3.69
  -6   0  -6    0.48    1.89
  -6   0  -6    2.61    1.69
   6   0   6   -2.14    3.35
  -7   0  -6    2.38    1.92
  -8   1   6    4.69    1.89
  -7   1   6   21.42    2.43
  -6   1   6    4.99    1.55
   5  -1  -6   20.92    2.78
  -5   1   6   21.12    1.93
   4  -1  -6   -1.15    1.58
  -4   1   6    0.08    0.98
   3  -1  -6    1.67    1.95
   2  -1  -6   14.45    2.74
  -2   1   6   16.17    2.55
   1  -1  -6  109.03    5.38
  -1   1   6  110.57    5.38
   0  -1  -6   13.81    2.62
   0   1   6   16.28    2.92
  -1  -1  -6  282.71    9.63
  -1  -1  -6  276.32    6.33
   1   1   6  303.12   10.38
  -2  -1  -6   21.85    3.03
  -2  -1  -6   24.24    2.00
   2   1   6   25.42    3.87
  -3  -1  -6   49.86    2.85
  -3  -1  -6   51.17    2.41
   3   1   6   54.38    5.11
  -4  -1  -6   89.55    4.03
  -4  -1  -6   87.77    3.35
   4   1   6   91.03    6.33
  -5  -1  -6    3.57    1.47
  -5  -1  -6    1.49    1.69
   5   1   6    4.21    3.62
  -6  -1  -6   47.32    3.62
  -6  -1  -6   49.25    3.16
   6   1   6   39.02    5.71
  -7  -1  -6    0.01    1.73
  -8   2   6   16.78    2.42
  -7   2   6    1.01    1.57
  -6   2   6   19.68    2.14
  -5   2   6   82.32    3.34
   4  -2  -6    9.61    2.42
  -4   2   6    9.63    1.37
   3  -2  -6  190.32    7.42
   2  -2  -6   27.14    3.30
   1  -2  -6  111.33    5.67
  -1   2   6  115.02    5.77
   0  -2  -6   17.92    1.40
   0  -2  -6   21.71    3.12
   0   2   6   22.90    3.47
  -1  -2  -6   39.11    2.06
  -1  -2  -6   34.83    3.76
   1   2   6   34.24    4.26
  -2  -2  -6   76.39    3.09
  -2  -2  -6   80.09    5.15
   2   2   6   70.33    5.56
  -3  -2  -6    1.94    1.03
  -3  -2  -6   -0.10    1.17
   3   2   6    1.19    2.91
  -4  -2  -6   45.59    2.51
  -4  -2  -6   46.75    3.06
   4   2   6   44.65    5.32
  -5  -2  -6   45.61    3.34
  -5  -2  -6   44.36    2.69
   5   2   6   38.26    5.64
  -6  -2  -6   -1.36    1.79
   6   2   6    1.97    3.93
   7   2   6   18.50    5.24
  -8   3   6   12.19    2.15
  -7   3   6    9.46    1.90
  -6   3   6    0.40    1.35
   5  -3  -6   47.17    3.88
  -5   3   6   43.56    2.53
   4  -3  -6   22.06    3.16
  -4   3   6   19.45    1.66
   3  -3  -6   33.35    3.70
   2  -3  -6    6.85    2.35
  -2   3   6    8.39    2.48
   1  -3  -6    9.67    2.67
  -1   3   6   10.69    2.82
   0  -3  -6    0.50    0.78
   0  -3  -6    0.21    1.99
   0   3   6   -0.51    2.29
  -1  -3  -6  104.69    3.15
   1   3   6   90.77    6.23
  -2  -3  -6    4.95    1.31
   2   3   6    5.53    3.22
  -3  -3  -6   55.55    2.95
  -3  -3  -6   56.35    2.37
   3   3   6   56.25    5.68
  -4  -3  -6    2.15    1.50
   4   3   6    2.15    3.64
  -5  -3  -6    1.30    1.67
   5   3   6   -2.47    3.72
  -6  -3  -6   -1.74    1.85
   6   3   6   -0.05    4.10
  -7   4   6    3.80    1.70
  -6   4   6   31.68    2.56
   5  -4  -6    1.27    3.26
  -5   4   6    2.51    1.28
  -4   4   6   20.75    1.74
  -3   4   6    0.39    0.96
  -2   4   6   16.73    3.15
  -1   4   6   16.62    3.47
   0   4   6   96.46    6.33
  -1  -4  -6    4.74    3.94
   1   4   6    7.28    3.51
   3   4   6   25.23    5.08
  -4  -4  -6   22.20    2.47
   4   4   6   35.46    5.76
   5   4   6   51.38    6.87
   6   4   6    6.28    4.58
   8  -5  -6    3.96    3.05
   6  -5  -6    1.57    3.15
   5  -5  -6    2.54    3.24
   4  -5  -6    0.56    3.74
   3  -5  -6   -1.94    3.48
  -2   5   6  154.41    7.36
   1  -5  -6    0.64    3.83
  -1   5   6   13.59    3.55
  -1  -5  -6    2.32    3.67
   1   5   6    9.98    4.11
  -2  -5  -6    2.11    3.32
   2   5   6    7.17    4.14
   3   5   6   18.51    5.23
   4   5   6   11.71    5.04
   5   5   6   13.23    5.21
   7  -6  -6    3.37    2.93
   6  -6  -6   -0.07    4.10
   5  -6  -6    2.12    3.57
   4  -6  -6   18.25    4.59
   3  -6  -6    0.50    3.68
   2  -6  -6   -1.68    3.72
   1  -6  -6   -0.77    3.90
  -1   6   6   -0.59    2.81
   0  -6  -6    3.89    3.83
   0   6   6   34.01    5.32
  -1  -6  -6    9.73    4.66
   1   6   6    7.83    4.43
   2   6   6   38.99    6.48
   3   6   6    1.29    4.43
   4   6   6    9.43    5.16
   5   6   6    3.17    4.88
   7  -7  -6    6.96    3.29
   6  -7  -6    3.39    2.83
   6  -7  -6    2.09    4.57
   5  -7  -6    1.89    4.39
   4  -7  -6   -1.13    4.25
   3  -7  -6    1.84    4.70
   2  -7  -6   16.66    5.91
   1  -7  -6   17.35    5.89
  -1   7   6   23.80    4.70
   0  -7  -6    5.36    4.75
   0   7   6    6.65    4.32
  -1  -7  -6   18.36    5.88
   1   7   6   42.80    6.79
   2   7   6    5.34    5.10
   3   7   6   11.14    5.67
   4   7   6   24.97    6.24
   6  -8  -6    2.85    3.07
   5  -8  -6    4.36    5.09
   5  -8  -6   15.55    3.62
   4  -8  -6   -2.30    5.04
   4  -8  -6    0.69    2.55
   3  -8  -6    7.21    6.60
   2  -8  -6    4.19    2.36
   2  -8  -6   -0.61    5.37
   1  -8  -6   14.23    6.37
   0  -8  -6   -2.29    5.02
   0   8   6    2.70    4.40
  -1  -8  -6    0.84    5.48
   1   8   6    8.00    5.23
   2   8   6   28.00    6.66
   3   8   6   -0.63    5.03
   5  -9  -6   20.44    4.16
   4  -9  -6    0.51    2.72
   3  -9  -6   17.40    3.27
   3  -9  -6   -7.97    6.29
   2  -9  -6    1.91    6.19
   1  -9  -6    0.00    5.68
   0  -9  -6    2.55    5.65
   0   9   6    1.38    4.49
   1   9   6    9.08    5.67
   1  11  -7    6.09    4.25
   0  11  -7    1.46    4.06
   0 -11   7    0.51    5.92
   1 -11   7    5.04    6.06
   3  10  -7   34.95    5.81
   2  10  -7    6.23    4.12
   1  10  -7   20.29    4.99
   0  10  -7   48.52    5.86
   0 -10   7   27.69    7.03
   1 -10   7    5.27    5.60
   2 -10   7   19.89    6.31
   3 -10   7    3.29    5.10
   4   9  -7    3.34    3.66
   3   9  -7    5.05    3.68
   2   9  -7    6.61    3.81
   1   9  -7   17.82    4.44
  -1  -9   7   15.64    5.71
   0   9  -7    5.72    3.66
   0  -9   7   -0.40    4.80
  -1   9  -7   29.65    4.99
   1  -9   7   17.74    5.98
   2  -9   7   -3.92    4.37
  -3   9  -7    2.30    1.49
   3  -9   7   -1.24    4.35
  -4   9  -7    8.92    1.87
   4  -9   7    3.20    4.55
  -5   9  -7    2.83    1.68
   5   8  -7   12.92    3.86
   4   8  -7    2.90    2.98
   3   8  -7   29.51    4.70
   2   8  -7    1.59    3.04
   1   8  -7   27.88    4.60
  -1  -8   7   30.78    5.90
   0   8  -7    7.55    3.46
   0  -8   7    6.73    4.60
  -1   8  -7    0.97    2.81
   1  -8   7   -0.93    4.06
   2  -8   7   -2.81    3.93
   3  -8   7   19.57    5.31
  -4   8  -7    1.10    1.79
  -4   8  -7   -0.69    1.43
   4  -8   7   -0.86    3.96
  -5   8  -7   37.56    2.93
   5  -8   7   25.12    5.67
  -6   8  -7    0.72    1.82
   6   7  -7   11.28    3.49
  -6  -7   7   10.32    2.03
   5   7  -7    5.35    3.00
  -5  -7   7    6.55    1.71
   4   7  -7   75.32    5.68
  -4  -7   7   71.55    3.28
   3   7  -7    0.99    2.57
  -3  -7   7    2.68    1.22
   2   7  -7   57.96    5.16
  -2  -7   7   64.09    5.88
  -2  -7   7   63.73    2.75
   1   7  -7   64.48    5.35
  -1  -7   7   63.44    6.10
   0   7  -7   12.82    3.57
   0  -7   7    9.66    4.33
  -1   7  -7   80.14    5.67
   1  -7   7   78.81    6.80
   2  -7   7    0.16    3.58
   3  -7   7   57.73    6.25
  -4   7  -7    0.19    1.66
  -4   7  -7   -2.23    1.24
   4  -7   7   -1.00    3.76
  -5   7  -7   23.42    2.48
  -5   7  -7   18.99    2.77
   5  -7   7   16.51    4.88
  -6   7  -7    0.02    1.67
  -7  -6   7   -0.65    1.57
   6   6  -7   57.18    5.06
  -6  -6   7   61.18    3.48
   5   6  -7    3.26    2.64
  -5  -6   7    2.19    1.40
   4   6  -7   36.92    4.17
  -4  -6   7   36.64    2.46
   3   6  -7   18.57    3.41
  -3  -6   7   17.07    1.71
   2   6  -7   -0.25    2.26
  -2  -6   7   -0.25    2.71
   1   6  -7   46.71    4.52
  -1  -6   7   47.95    5.08
   0   6  -7   46.38    4.47
   0  -6   7   50.42    5.27
  -1   6  -7   30.42    4.01
   1  -6   7   24.08    4.63
  -2   6  -7   38.29    4.33
   2  -6   7   30.62    5.04
   3  -6   7   10.44    3.97
  -4   6  -7    2.27    1.44
  -4   6  -7    2.79    1.70
   4  -6   7    2.82    3.71
  -5   6  -7   13.10    2.49
  -5   6  -7   24.88    2.51
   5  -6   7   13.37    4.58
  -6   6  -7    1.57    1.71
   6  -6   7    3.86    4.56
  -7  -5   7    3.45    1.90
   6   5  -7    0.06    2.35
  -6  -5   7    2.69    1.55
   5   5  -7   -0.31    2.18
  -5  -5   7   -2.23    1.26
   4   5  -7   41.04    4.09
   3   5  -7    2.48    2.29
  -3  -5   7    1.34    1.11
   2   5  -7   92.03    5.46
  -2  -5   7   92.94    5.75
   1   5  -7   -0.50    2.02
  -1  -5   7    1.86    2.80
   0   5  -7   24.96    3.48
   0  -5   7   16.71    3.83
  -1   5  -7    0.94    2.12
   1  -5   7    2.06    3.07
  -2   5  -7   11.51    2.91
   2  -5   7   15.03    3.91
   3  -5   7    3.38    3.27
  -4   5  -7   59.01    3.10
  -4   5  -7   46.60    3.53
   4  -5   7   63.80    5.89
  -5   5  -7    1.54    1.56
  -5   5  -7    4.08    1.92
   5  -5   7   -0.74    3.88
  -6   5  -7   26.03    2.68
   6  -5   7   26.53    5.58
  -7   5  -7    6.63    2.16
  -8  -4   7    1.16    1.91
  -7  -4   7    2.70    1.77
  -6  -4   7   11.50    1.97
   5   4  -7   29.72    3.59
  -5  -4   7   29.21    2.41
   4   4  -7    7.96    2.56
  -4  -4   7    8.84    1.51
   3   4  -7   43.54    3.88
   2   4  -7   35.98    3.56
  -2  -4   7   36.18    4.02
   1   4  -7   36.34    3.62
  -1  -4   7   35.30    4.08
   0   4  -7  197.03    7.81
   0  -4   7  191.85    8.26
  -1   4  -7   33.36    3.90
   1  -4   7   34.27    4.43
  -2   4  -7  203.19    8.09
   2  -4   7  185.35    8.56
   3  -4   7    7.49    3.37
  -4   4  -7   30.27    2.87
  -4   4  -7   34.51    2.51
   4  -4   7   31.74    5.08
  -5   4  -7    3.70    2.06
  -5   4  -7    4.08    1.49
   5  -4   7    0.55    3.97
  -6   4  -7    1.05    1.60
   6  -4   7    1.57    4.25
  -7   4  -7    5.68    2.10
   7  -4   7    3.56    4.49
  -8  -3   7    0.95    1.84
  -7  -3   7   40.35    3.24
  -6  -3   7    6.99    1.78
   5   3  -7   66.44    4.45
  -5  -3   7   64.38    3.19
   4   3  -7   31.59    3.45
  -4  -3   7   32.62    2.38
   3   3  -7   39.84    3.67
   2   3  -7  106.72    5.46
  -2  -3   7  106.40    5.97
   1   3  -7   19.63    3.13
  -1  -3   7   21.41    3.48
   0   3  -7   70.14    4.78
   0  -3   7   72.30    5.17
  -1   3  -7   46.20    4.14
   1  -3   7   42.99    4.60
  -2   3  -7    2.46    2.29
   2  -3   7    3.86    2.78
  -3   3  -7    5.75    1.73
   3  -3   7    2.77    3.07
  -4   3  -7   17.04    1.85
  -4   3  -7   21.80    2.63
   4  -3   7   21.27    4.67
  -5   3  -7    2.13    1.88
  -5   3  -7    1.06    1.48
   5  -3   7    2.21    3.81
  -6   3  -7   23.50    2.56
  -6   3  -7   18.66    2.95
   6  -3   7   17.80    4.83
  -7   3  -7    2.00    1.88
  -8  -2   7    0.18    1.79
  -7  -2   7   10.18    2.13
  -6  -2   7   -0.15    1.36
   5   2  -7   28.14    3.43
  -5  -2   7   28.76    2.44
   4   2  -7    8.83    2.63
  -4  -2   7    8.47    1.45
   3   2  -7   92.46    5.14
   2   2  -7    6.33    2.41
  -2  -2   7    4.97    2.31
   1   2  -7   77.34    4.90
  -1  -2   7   85.67    5.37
   0   2  -7   -0.46    1.83
   0  -2   7    0.85    2.46
  -1   2  -7   18.59    3.12
   1  -2   7   17.38    3.75
  -2   2  -7   14.56    2.99
   2  -2   7   11.46    3.51
  -3   2  -7   38.00    2.83
   3  -2   7   45.05    5.12
  -4   2  -7   10.37    1.69
  -4   2  -7   11.15    2.06
   4  -2   7   17.20    4.40
  -5   2  -7   65.63    3.50
  -5   2  -7   65.58    4.23
   5  -2   7   79.38    6.39
  -6   2  -7    1.98    2.16
  -6   2  -7    0.46    1.61
   6  -2   7    1.30    3.97
  -7   2  -7    9.67    2.29
   7  -2   7   15.49    4.97
  -8  -1   7    1.79    1.84
  -7  -1   7   10.04    2.06
  -6  -1   7   24.59    2.46
   5   1  -7   32.03    3.52
  -5  -1   7   29.21    2.39
   4   1  -7   75.63    4.72
  -4  -1   7   74.39    3.22
   3   1  -7    4.46    2.30
   2   1  -7   49.73    4.16
  -2  -1   7   61.00    4.23
   1   1  -7   77.83    4.81
  -1  -1   7   64.56    4.72
   0   1  -7    6.50    2.33
   0  -1   7   11.58    3.09
  -1   1  -7  247.55    9.00
   1  -1   7  241.85    9.77
  -2   1  -7    4.43    2.29
  -2   1  -7    2.86    1.44
   2  -1   7    3.25    2.91
  -3   1  -7  131.91    4.97
   3  -1   7  152.46    7.82
  -4   1  -7    8.66    2.09
  -4   1  -7    8.90    1.71
   4  -1   7    9.57    3.88
  -5   1  -7   39.86    3.32
  -5   1  -7   43.70    2.97
   5  -1   7   37.79    5.57
  -6   1  -7    9.66    2.09
  -6   1  -7    6.99    2.48
   6  -1   7    6.30    4.28
  -7   1  -7   -1.18    1.73
  -8   0   7   28.79    2.98
  -7   0   7   -0.89    1.53
  -6   0   7   82.28    3.78
   5   0  -7    9.95    2.55
   4   0  -7   53.13    4.10
  -4   0   7   57.81    2.76
   3   0  -7   64.22    4.41
   2   0  -7    1.26    1.81
  -2   0   7   -0.33    1.68
   1   0  -7  190.01    7.64
  -1   0   7  190.02    7.77
   0   0  -7   13.12    2.89
   0   0   7   11.97    3.02
  -1   0  -7   61.96    4.67
   1   0   7   69.35    5.32
  -2   0  -7    3.19    1.40
  -2   0  -7    4.39    2.57
   2   0   7    7.10    3.19
  -3   0  -7    5.50    1.55
   3   0   7    9.62    3.66
  -4   0  -7   -0.87    1.40
  -4   0  -7    3.54    1.40
   4   0   7   -0.62    3.35
  -5   0  -7   38.81    3.39
  -5   0  -7   46.39    2.97
   5   0   7   42.38    5.72
  -6   0  -7   -0.55    1.60
  -6   0  -7    1.97    1.99
   6   0   7    1.84    4.01
  -7   0  -7   11.80    2.44
   7   0   7   12.48    5.03
  -8   1   7   12.93    2.36
  -7   1   7    1.94    1.66
  -6   1   7    0.75    1.31
   5  -1  -7   10.00    2.63
  -5   1   7    9.76    1.59
   4  -1  -7   30.59    3.52
  -4   1   7   29.03    2.23
   3  -1  -7   12.89    2.83
   2  -1  -7   42.93    3.99
  -2   1   7   34.45    3.64
   1  -1  -7   26.01    3.45
   0  -1  -7   34.64    4.01
   0   1   7   31.73    3.97
  -1  -1  -7   16.85    3.10
  -1  -1  -7   20.90    1.85
   1   1   7   21.40    3.77
  -2  -1  -7   10.19    1.62
  -2  -1  -7    7.55    2.59
   2   1   7   11.65    3.54
  -3  -1  -7   39.16    2.78
   3   1   7   42.17    5.27
  -4  -1  -7   38.34    2.56
  -4  -1  -7   36.95    3.00
   4   1   7   43.07    5.60
  -5  -1  -7    0.26    1.78
  -5  -1  -7    0.22    1.42
   5   1   7    2.78    4.00
  -6  -1  -7    9.68    2.19
   6   1   7   12.44    4.73
  -8   2   7    2.31    1.93
  -7   2   7   -0.66    1.46
  -6   2   7   18.01    2.16
   5  -2  -7   14.77    2.91
  -5   2   7   11.45    1.72
   4  -2  -7   17.32    3.14
  -4   2   7   16.75    1.76
   3  -2  -7   31.30    3.77
   2  -2  -7   30.24    3.94
  -2   2   7   30.98    3.69
   1  -2  -7    3.13    2.30
  -1   2   7    4.66    2.61
   0  -2  -7  142.86    6.91
   0  -2  -7  136.87    3.76
   0   2   7  139.59    7.28
  -1  -2  -7    4.30    2.40
  -1  -2  -7    4.19    1.13
   1   2   7    6.47    3.20
  -2  -2  -7  119.94    6.61
  -2  -2  -7  118.80    4.11
   2   2   7  119.31    7.36
  -3  -2  -7   14.22    1.93
  -3  -2  -7   17.38    1.78
   3   2   7   22.35    4.67
  -4  -2  -7   50.35    3.38
  -4  -2  -7   59.85    2.99
   4   2   7   47.38    5.85
  -5  -2  -7   10.82    2.32
   5   2   7   11.93    4.66
   6   2   7   -1.41    4.14
  -8   3   7   -2.17    1.64
  -7   3   7   34.97    2.95
  -6   3   7    0.16    1.32
   5  -3  -7   51.44    4.36
  -5   3   7   50.86    2.81
   4  -3  -7   31.57    3.87
  -4   3   7   36.56    2.42
   3  -3  -7   22.00    3.54
   2  -3  -7  106.48    6.04
  -2   3   7  111.75    6.07
   1  -3  -7    3.95    2.43
  -1   3   7    1.55    2.55
   0  -3  -7   83.84    5.75
   0   3   7   89.50    6.21
  -1  -3  -7   13.46    3.29
   1   3   7   17.07    4.23
  -2  -3  -7    3.47    1.34
   2   3   7    7.79    3.85
  -3  -3  -7    0.02    1.33
   3   3   7   -2.41    3.47
  -4  -3  -7   10.76    2.03
   4   3   7   12.54    4.71
  -5  -3  -7    2.54    1.89
   5   3   7    5.78    4.34
   6   3   7    8.91    5.02
  -7   4   7   11.43    2.06
   6  -4  -7    1.80    3.21
  -6   4   7    8.70    1.68
  -5   4   7    5.50    1.47
  -4   4   7   11.90    1.53
   2  -4  -7    8.14    3.07
  -2   4   7    8.92    3.09
  -1   4   7   56.99    5.33
   0   4   7    0.61    2.96
  -1  -4  -7    1.17    4.17
   1   4   7    1.83    3.40
  -2  -4  -7    1.59    4.10
   2   4   7   18.13    5.02
   3   4   7    9.65    4.80
   4   4   7   15.30    5.28
   5   4   7   15.68    5.52
   6  -5  -7    3.50    3.09
   5  -5  -7   -0.05    3.59
   4  -5  -7    8.29    4.62
   3  -5  -7    1.12    4.24
   2  -5  -7   -2.09    4.10
   1  -5  -7   28.37    6.19
  -1   5   7   34.26    5.02
   0  -5  -7    0.51    4.40
   0   5   7   -0.84    3.28
  -2  -5  -7   -1.72    3.56
   2   5   7   -1.95    4.20
   3   5   7   70.80    7.67
   4   5   7    4.98    4.99
   5   5   7   10.38    5.42
   6  -6  -7   -1.78    3.85
   5  -6  -7    5.11    3.83
   4  -6  -7    4.50    4.30
   3  -6  -7    2.45    4.49
   2  -6  -7    1.07    4.34
   0  -6  -7    5.05    4.31
   0   6   7   -1.37    3.65
  -1  -6  -7   19.24    4.88
   1   6   7   28.94    6.18
   2   6   7    2.16    4.90
   3   6   7    1.38    5.18
   4   6   7    2.80    5.15
   6  -7  -7    2.35    3.17
   5  -7  -7    1.26    4.60
   4  -7  -7   -2.05    4.04
   3  -7  -7    4.24    5.18
   2  -7  -7   17.37    5.85
   1  -7  -7    4.52    5.13
   0  -7  -7    2.35    4.98
   0   7   7    9.21    5.07
  -1  -7  -7    0.02    4.77
   1   7   7   17.24    6.03
   2   7   7   -0.23    5.21
   3   7   7   25.70    6.93
   5  -8  -7    1.92    2.85
   4  -8  -7    5.49    2.95
   4  -8  -7   -0.64    5.80
   3  -8  -7    6.49    6.52
   3  -8  -7    0.51    2.31
   2  -8  -7   -4.69    5.41
   1  -8  -7   -4.75    5.10
   0  -8  -7    6.14    5.75
   0   8   7   22.04    6.05
   1   8   7   -0.22    4.87
   2   8   7   27.85    7.21
   4  -9  -7    4.42    3.08
   1  11  -8    7.98    4.72
   0  11  -8   -1.48    3.89
   0 -11   8   -3.14    5.95
   3  10  -8    0.82    3.92
   2  10  -8    8.46    4.50
   1  10  -8    3.08    4.11
   0  10  -8   33.99    5.79
   0 -10   8   17.89    6.73
   1 -10   8   -0.93    5.28
   2 -10   8    9.85    5.88
   4   9  -8   29.55    5.42
   3   9  -8    0.85    3.65
   2   9  -8   47.21    5.86
   1   9  -8   15.01    4.59
  -1  -9   8   12.67    5.53
   0   9  -8   28.84    5.18
   0  -9   8   18.27    6.18
  -1   9  -8   16.20    4.36
   1  -9   8   15.52    5.95
   2  -9   8    2.58    4.86
  -3   9  -8   14.93    2.01
   3  -9   8   13.92    5.55
  -4   9  -8    8.49    2.03
   5   8  -8    3.10    3.29
   4   8  -8   14.61    4.29
   3   8  -8    1.95    3.30
   2   8  -8   -1.90    3.06
   1   8  -8   -0.19    3.07
  -1  -8   8   -2.76    3.75
   0   8  -8   35.85    5.20
   0  -8   8   21.96    5.76
  -1   8  -8    2.55    3.09
   1  -8   8    1.58    4.42
   2  -8   8   20.33    5.70
   3  -8   8   -3.38    4.03
  -4   8  -8    4.87    1.76
   4  -8   8    3.46    4.33
  -5   8  -8   -0.88    1.63
   6   7  -8    1.05    2.83
  -6  -7   8    1.29    1.63
   5   7  -8   10.13    3.64
  -5  -7   8    6.34    1.68
   4   7  -8    4.69    3.21
  -4  -7   8    5.26    1.64
   3   7  -8   -0.87    2.76
  -3  -7   8   -1.35    1.16
   2   7  -8   47.68    5.14
   1   7  -8   34.73    4.83
  -1  -7   8   25.78    5.11
   0   7  -8   16.55    3.86
   0  -7   8   10.52    4.53
  -1   7  -8   42.02    4.97
   1  -7   8   32.86    5.98
   2  -7   8    7.02    4.61
   3  -7   8    8.27    4.51
  -4   7  -8   34.21    3.40
  -4   7  -8   31.16    2.66
   4  -7   8   19.31    5.18
  -5   7  -8    0.66    1.62
   5  -7   8   -1.02    4.25
  -7  -6   8    0.01    1.81
   6   6  -8    3.60    2.80
  -6  -6   8    0.74    1.61
   5   6  -8   47.21    4.77
  -5  -6   8   53.62    3.26
   4   6  -8    0.59    2.63
  -4  -6   8    1.77    1.40
   3   6  -8  111.86    6.54
  -3  -6   8  107.72    4.02
   2   6  -8   10.15    3.17
  -2  -6   8    7.50    3.58
   1   6  -8  107.74    6.44
  -1  -6   8  112.18    7.02
   0   6  -8   22.13    3.90
   0  -6   8   18.10    4.55
  -1   6  -8   21.45    3.99
   1  -6   8   18.27    4.75
   2  -6   8   55.88    6.06
   3  -6   8    7.48    4.14
  -4   6  -8   27.66    2.48
  -4   6  -8   31.01    3.23
   4  -6   8   18.88    4.95
  -5   6  -8    4.95    1.86
   5  -6   8   -0.76    4.01
  -6   6  -8    0.58    1.75
  -7  -5   8   21.19    2.72
   6   5  -8    0.21    2.40
  -6  -5   8    0.42    1.52
   5   5  -8   61.93    4.92
  -5  -5   8   61.62    3.46
   4   5  -8    0.16    2.30
  -4  -5   8    0.49    1.31
   3   5  -8   28.97    3.94
   2   5  -8    1.94    2.36
  -2  -5   8    3.80    2.92
   1   5  -8   21.14    3.62
  -1  -5   8   13.66    3.71
   0   5  -8    2.52    2.64
   0  -5   8    1.21    3.04
  -1   5  -8   65.78    5.31
   1  -5   8   62.16    5.74
  -2   5  -8   -0.12    2.21
   2  -5   8    0.99    3.38
   3  -5   8   20.40    4.76
  -4   5  -8    0.15    1.67
  -4   5  -8    0.68    1.28
   4  -5   8   -0.96    3.76
  -5   5  -8   -0.30    1.57
  -5   5  -8    0.98    1.99
   5  -5   8   -3.92    3.97
  -6   5  -8    3.14    1.82
   6  -5   8    0.68    4.40
  -7  -4   8    2.43    1.85
   6   4  -8   26.25    3.93
  -6  -4   8   30.37    2.81
   5   4  -8    4.59    2.55
  -5  -4   8    4.12    1.64
   4   4  -8    6.70    2.67
  -4  -4   8    5.91    1.62
   3   4  -8   20.41    3.46
   2   4  -8   11.41    3.05
  -2  -4   8   11.54    3.41
   1   4  -8   30.43    4.08
  -1  -4   8   32.22    4.44
   0   4  -8   19.17    3.52
   0  -4   8   21.67    4.08
  -1   4  -8    5.78    2.72
   1  -4   8    3.21    3.10
  -2   4  -8    4.76    2.64
   2  -4   8    8.08    3.75
  -3   4  -8   23.48    2.56
   3  -4   8   25.81    4.99
  -4   4  -8    8.09    2.07
  -4   4  -8    4.33    1.47
   4  -4   8    0.38    3.90
  -5   4  -8   50.77    4.07
  -5   4  -8   46.61    3.25
   5  -4   8   56.97    6.36
  -6   4  -8    5.85    2.03
   6  -4   8    2.12    4.36
  -8  -3   8    0.24    1.93
  -7  -3   8    2.37    1.87
   6   3  -8   11.50    3.16
  -6  -3   8   11.60    2.12
   5   3  -8    0.63    2.28
  -5  -3   8   -1.73    1.21
   4   3  -8   51.35    4.49
  -4  -3   8   60.30    3.18
   3   3  -8   -0.29    2.10
   2   3  -8  114.28    6.26
  -2  -3   8  121.21    6.56
   1   3  -8   24.29    3.67
  -1  -3   8   24.33    4.01
   0   3  -8   92.20    5.68
   0  -3   8   92.43    6.49
  -1   3  -8  121.21    6.48
   1  -3   8  115.19    7.34
  -2   3  -8    4.47    2.46
   2  -3   8    4.52    3.50
  -3   3  -8   86.91    4.35
   3  -3   8   84.25    6.81
  -4   3  -8    2.52    1.77
  -4   3  -8    1.76    1.47
   4  -3   8    4.75    4.07
  -5   3  -8   14.31    2.20
  -5   3  -8   11.35    2.60
   5  -3   8   13.04    4.70
  -6   3  -8    1.81    1.77
   6  -3   8   -2.74    3.97
  -8  -2   8   17.88    2.71
  -7  -2   8    7.00    2.07
   6   2  -8   73.94    5.02
  -6  -2   8   77.77    4.03
   5   2  -8    1.63    2.27
  -5  -2   8    2.67    1.53
   4   2  -8   60.03    4.73
  -4  -2   8   57.27    3.12
   3   2  -8   -1.67    2.00
   2   2  -8    2.35    2.25
  -2  -2   8    1.16    2.15
   1   2  -8   37.26    4.16
  -1  -2   8   37.16    4.45
   0   2  -8   39.48    4.19
   0  -2   8   40.18    4.85
  -1   2  -8   22.10    3.42
   1  -2   8   24.05    4.43
  -2   2  -8   75.81    5.40
   2  -2   8   63.52    6.01
  -3   2  -8    1.19    1.62
   3  -2   8    0.06    3.46
  -4   2  -8   29.61    3.05
  -4   2  -8   29.65    2.46
   4  -2   8   31.81    5.34
  -5   2  -8    4.21    1.80
  -5   2  -8    4.90    2.25
   5  -2   8   10.35    4.54
  -6   2  -8    1.00    1.74
   6  -2   8    1.60    4.25
  -8  -1   8    7.63    2.34
  -7  -1   8    7.43    2.04
  -6  -1   8    6.51    1.82
   5   1  -8    1.22    2.28
  -5  -1   8    4.43    1.52
   4   1  -8   15.27    3.12
   3   1  -8    0.85    2.21
   2   1  -8  108.48    6.03
  -2  -1   8  114.97    6.06
   1   1  -8   32.92    3.93
  -1  -1   8   35.37    4.22
   0   1  -8   81.78    5.33
   0  -1   8   81.53    5.83
  -1   1  -8   37.21    4.40
   1  -1   8   39.73    4.97
  -2   1  -8   10.40    3.00
  -2   1  -8    7.73    1.75
   2  -1   8    8.49    3.51
  -3   1  -8    0.34    1.56
   3  -1   8    5.74    3.61
  -4   1  -8   56.72    3.85
  -4   1  -8   46.28    2.85
   4  -1   8   52.21    5.80
  -5   1  -8   -0.12    1.52
  -5   1  -8   -0.04    1.79
   5  -1   8   -1.14    3.91
  -6   1  -8   25.73    2.87
   6  -1   8   29.38    5.70
  -8   0   8    1.87    1.94
  -7   0   8    4.79    1.86
   6   0  -8    1.80    2.17
  -6   0   8    1.71    1.61
   5   0  -8   44.06    4.10
  -5   0   8   38.23    2.78
   4   0  -8   -0.78    2.04
   3   0  -8  143.39    6.83
   2   0  -8    6.91    2.66
  -2   0   8    7.16    2.50
   1   0  -8   91.38    5.75
  -1   0   8   87.12    5.70
   0   0  -8   54.64    4.61
   0   0   8   48.16    4.96
  -1   0  -8   16.68    3.49
   1   0   8   17.72    4.10
  -2   0  -8  108.28    4.26
  -2   0  -8  103.41    6.26
   2   0   8  111.67    7.18
  -3   0  -8   -0.97    1.38
   3   0   8    0.58    3.38
  -4   0  -8   62.21    3.89
  -4   0  -8   61.60    3.28
   4   0   8   65.72    6.35
  -5   0  -8    3.61    1.85
  -5   0  -8   -0.26    1.85
   5   0   8   -0.51    3.80
  -6   0  -8    5.67    2.06
   6   0   8   -0.22    4.21
  -8   1   8    3.98    2.01
  -7   1   8   35.21    3.02
  -6   1   8    0.75    1.54
   5  -1  -8   76.42    5.08
  -5   1   8   84.31    3.75
   4  -1  -8    7.51    2.68
  -4   1   8    5.15    1.50
   3  -1  -8   40.43    4.16
   2  -1  -8   21.06    3.48
  -2   1   8   25.11    3.62
   1  -1  -8   11.46    3.03
  -1   1   8    5.77    2.80
   0  -1  -8    8.52    3.02
   0   1   8    8.08    3.31
  -1  -1  -8   35.96    2.36
  -1  -1  -8   36.63    4.42
   1   1   8   43.05    5.21
  -2  -1  -8    2.36    2.54
  -2  -1  -8    2.01    1.40
   2   1   8    2.95    3.46
  -3  -1  -8   16.01    2.17
   3   1   8   18.12    4.56
  -4  -1  -8    1.43    1.77
  -4  -1  -8    2.81    1.56
   4   1   8    4.22    4.14
  -5  -1  -8   -0.50    1.92
  -5  -1  -8    1.88    1.71
   5   1   8   -0.24    4.08
   6   1   8    9.22    5.10
  -8   2   8    2.39    1.92
  -7   2   8    4.59    1.87
   6  -2  -8   10.37    2.77
  -6   2   8   10.61    1.99
   5  -2  -8    3.54    2.49
  -5   2   8    2.67    1.46
   4  -2  -8    5.97    2.67
  -4   2   8    7.98    1.57
   3  -2  -8   30.22    4.05
   2  -2  -8   16.52    3.40
  -2   2   8   13.60    3.24
   1  -2  -8   45.31    4.67
  -1   2   8   47.44    4.91
   0  -2  -8   20.76    3.81
   0   2   8   20.57    4.22
  -1  -2  -8    3.00    2.66
  -1  -2  -8    3.82    1.33
   1   2   8    4.15    3.46
  -2  -2  -8   -0.82    2.46
  -2  -2  -8    2.46    1.34
   2   2   8    2.82    3.67
  -3  -2  -8   12.37    1.80
  -3  -2  -8    9.65    2.00
   3   2   8   13.85    4.71
  -4  -2  -8   -0.28    1.73
   4   2   8    1.12    4.02
  -5  -2  -8   25.80    3.03
   5   2   8   22.12    5.50
  -8   3   8    4.39    2.11
  -7   3   8    0.73    1.64
  -6   3   8    2.60    1.61
   5  -3  -8    8.83    3.03
  -5   3   8   12.26    1.83
   4  -3  -8   28.63    4.09
  -4   3   8   29.32    2.36
   3  -3  -8   14.59    3.40
   2  -3  -8   62.79    5.26
   1  -3  -8   21.54    4.14
  -1   3   8   22.41    4.13
   0  -3  -8   54.54    5.33
   0   3   8   58.92    5.77
  -1  -3  -8   76.91    6.03
   1   3   8   86.38    6.93
   2   3   8    0.07    3.93
   3   3   8   79.92    7.38
   4   3   8    3.13    4.47
   5   3   8   17.22    5.52
  -5   4   8   -0.54    1.31
  -4   4   8   47.01    2.77
   3  -4  -8    9.28    3.43
   2  -4  -8    3.62    3.14
  -1   4   8   43.56    5.39
   0   4   8   14.18    4.51
  -1  -4  -8    4.73    5.02
   1   4   8   30.75    5.78
   2   4   8   24.62    5.81
   3   4   8   -4.62    4.17
   4   4   8   10.07    5.36
   6  -5  -8   -0.09    3.33
   5  -5  -8   -1.53    4.03
   4  -5  -8    1.47    4.43
   3  -5  -8    0.50    4.54
   1  -5  -8    3.55    4.92
  -1   5   8   -0.30    3.40
   0   5   8   36.10    6.19
  -1  -5  -8   -1.40    4.55
   1   5   8   -0.64    4.43
   2   5   8    2.48    5.05
   3   5   8    2.32    5.32
   4   5   8   19.88    6.17
   5  -6  -8   -1.01    3.90
   4  -6  -8    2.81    4.74
   3  -6  -8   -3.28    4.39
   2  -6  -8    2.70    4.80
   1  -6  -8    0.06    4.57
   0  -6  -8   -1.06    4.23
   0   6   8   14.04    5.35
  -1  -6  -8   -0.29    4.12
   1   6   8    8.14    5.50
   2   6   8   37.38    7.70
   3   6   8    5.18    5.80
   4  -7  -8   -2.78    4.43
   3  -7  -8   13.23    6.04
   2  -7  -8    7.21    4.93
   1  -7  -8    0.07    5.33
   0  -7  -8    0.90    5.51
   0   7   8   15.43    5.87
  -1  -7  -8   -0.25    5.17
   1   7   8    0.60    5.20
   2   7   8   -2.98    5.47
   5  -8  -8    3.18    3.29
   4  -8  -8   -2.43    2.68
   2  -8  -8   -0.19    5.76
   1  -8  -8   -1.28    5.22
   0  -8  -8   -2.78    5.57
   1   8   8    2.82    5.67
   2  10  -9    0.67    4.04
   1  10  -9   18.43    5.26
   0  10  -9    1.36    4.04
   0 -10   9    6.13    5.74
   1 -10   9    5.54    5.80
   3   9  -9   -0.05    3.51
   2   9  -9    0.98    3.84
   1   9  -9   32.57    5.58
   0   9  -9    4.29    3.94
   0  -9   9    1.87    5.06
   1  -9   9   17.44    6.18
   2  -9   9    4.46    5.18
  -3   9  -9   14.91    2.23
   3  -9   9    8.67    5.30
  -4   9  -9    3.05    1.75
   4   8  -9    9.51    4.01
   3   8  -9   44.80    5.90
   2   8  -9   -1.97    3.26
   1   8  -9   59.47    6.05
  -1  -8   9   58.21    6.72
   0   8  -9    1.53    3.46
   0  -8   9    6.90    4.89
  -1   8  -9   22.04    4.72
   1  -8   9   10.70    5.32
   2  -8   9    4.26    4.94
   3  -8   9    3.48    4.63
  -4   8  -9    0.37    1.63
  -6  -7   9   -0.72    1.63
   5   7  -9   19.20    4.11
  -5  -7   9   13.07    2.32
   4   7  -9   10.49    3.71
  -4  -7   9   11.14    2.09
   3   7  -9    4.75    3.35
  -3  -7   9    3.74    1.63
   2   7  -9   29.63    4.87
   1   7  -9    5.57    3.59
  -1  -7   9    3.35    3.96
   0   7  -9    3.51    3.31
   0  -7   9    1.84    4.11
  -1   7  -9   31.33    5.05
   1  -7   9   23.26    5.56
   2  -7   9    8.24    4.72
   3  -7   9   14.20    5.16
  -4   7  -9    4.36    1.80
   4  -7   9    5.09    4.43
  -5   7  -9    2.12    1.87
   6   6  -9   21.56    4.22
  -6  -6   9   22.60    2.65
   5   6  -9   11.06    3.57
  -5  -6   9    4.83    1.83
   4   6  -9    3.30    3.00
  -4  -6   9    3.04    1.76
   3   6  -9    0.70    2.75
  -3  -6   9    1.08    1.57
   2   6  -9    8.91    3.49
   1   6  -9   12.43    3.80
  -1  -6   9   11.73    4.18
   0   6  -9   39.26    5.17
   0  -6   9   37.17    5.71
  -1   6  -9    0.68    2.80
   1  -6   9    2.54    3.97
   2  -6   9   75.28    7.00
   3  -6   9    5.54    4.55
  -4   6  -9   22.92    2.47
   4  -6   9   15.75    5.25
  -5   6  -9   25.35    2.80
   5  -6   9   21.92    5.98
  -7  -5   9   14.00    2.64
   6   5  -9   -0.16    2.77
  -6  -5   9    0.76    1.75
   5   5  -9   17.89    3.86
  -5  -5   9   18.18    2.53
   4   5  -9   40.35    4.91
  -4  -5   9   40.62    3.07
   3   5  -9   11.74    3.46
   2   5  -9  126.72    7.26
   1   5  -9    0.38    2.74
  -1  -5   9   -3.81    2.84
   0   5  -9   72.74    5.93
   0  -5   9   65.86    6.17
  -1   5  -9    7.35    3.28
   1  -5   9    5.99    4.09
   2  -5   9    0.73    3.89
   3  -5   9    7.89    4.66
  -4   5  -9    0.50    1.41
  -4   5  -9    3.34    2.09
   4  -5   9    4.63    4.46
  -5   5  -9    4.04    1.83
   5  -5   9    6.01    4.76
  -7  -4   9    5.39    2.12
   6   4  -9   12.28    3.60
  -6  -4   9   16.08    2.48
   5   4  -9    1.26    2.77
  -5  -4   9    2.89    1.76
   4   4  -9   27.36    4.10
  -4  -4   9   22.03    2.42
   3   4  -9   11.67    3.46
   2   4  -9    7.68    3.19
  -2  -4   9    8.98    3.45
   1   4  -9   10.44    3.53
  -1  -4   9   10.14    3.81
   0   4  -9   10.09    3.36
   0  -4   9    8.86    4.00
  -1   4  -9    5.20    2.94
   1  -4   9    6.21    4.09
  -2   4  -9   56.65    5.11
   2  -4   9   43.92    6.48
  -3   4  -9    5.52    2.03
   3  -4   9    1.82    4.31
  -4   4  -9   17.74    2.90
   4  -4   9   14.30    4.97
  -5   4  -9    0.03    1.64
   5  -4   9    0.67    4.22
  -6   4  -9    1.77    1.93
  -7  -3   9    9.16    2.31
   6   3  -9    4.26    2.85
  -6  -3   9    5.24    1.95
   5   3  -9   33.12    4.41
  -5  -3   9   33.91    2.91
   4   3  -9   -0.62    2.52
  -4  -3   9   -0.67    1.41
   3   3  -9    1.92    2.80
   2   3  -9    0.56    2.62
  -2  -3   9    1.51    2.76
   1   3  -9   38.18    4.46
  -1  -3   9   44.85    5.10
   0   3  -9    0.99    2.55
   0  -3   9    1.89    3.33
  -1   3  -9   77.38    5.61
   1  -3   9   86.48    6.90
  -2   3  -9    2.13    2.58
   2  -3   9    0.91    3.71
  -3   3  -9   31.78    2.97
   3  -3   9   22.12    5.47
  -4   3  -9   12.00    2.56
   4  -3   9    8.16    4.55
  -5   3  -9    4.37    1.90
   5  -3   9    4.93    4.32
  -6   3  -9   23.53    2.86
  -7  -2   9   -1.36    1.65
   6   2  -9   22.25    3.71
  -6  -2   9   16.26    2.41
   5   2  -9   26.20    3.97
  -5  -2   9   25.91    2.54
   4   2  -9    9.28    3.09
   3   2  -9  111.91    6.53
   2   2  -9   -0.08    2.44
  -2  -2   9    1.40    2.49
   1   2  -9  133.38    7.16
  -1  -2   9  142.62    7.54
   0   2  -9   10.81    3.14
   0  -2   9    6.84    3.62
  -1   2  -9   36.65    4.40
   1  -2   9   33.35    5.31
  -2   2  -9   40.19    4.53
   2  -2   9   34.14    5.65
  -3   2  -9    0.95    1.73
   3  -2   9   -1.52    3.58
  -4   2  -9   13.95    2.17
  -4   2  -9   20.00    2.84
   4  -2   9   13.01    4.67
  -5   2  -9   14.19    2.35
   5  -2   9    9.39    4.63
  -6   2  -9    2.32    1.93
  -7  -1   9   21.60    2.72
   6   1  -9    4.21    2.75
  -6  -1   9    5.74    1.90
   5   1  -9   47.86    4.44
  -5  -1   9   50.97    3.28
   4   1  -9    5.91    2.78
   3   1  -9   15.37    3.39
   2   1  -9   25.35    3.82
  -2  -1   9   19.05    3.61
   1   1  -9    5.14    2.74
  -1  -1   9    3.43    2.79
   0   1  -9    0.75    2.55
   0  -1   9    1.50    2.94
  -1   1  -9   40.81    4.52
   1  -1   9   44.58    5.37
  -2   1  -9   31.09    4.59
  -2   1  -9   25.37    2.51
   2  -1   9   27.05    5.13
  -3   1  -9   54.17    3.64
   3  -1   9   47.99    5.94
  -4   1  -9    1.71    1.63
  -4   1  -9    2.19    2.01
   4  -1   9    2.15    4.15
  -5   1  -9    5.08    1.92
   5  -1   9    4.96    4.46
  -6   1  -9    3.60    2.16
  -7   0   9    3.26    1.92
   6   0  -9   30.75    4.00
  -6   0   9   22.50    2.63
   5   0  -9    5.07    2.65
  -5   0   9    0.05    1.41
   4   0  -9   13.83    3.49
   3   0  -9   -0.04    2.39
   2   0  -9    6.59    2.97
  -2   0   9    6.14    2.81
   1   0  -9   27.07    4.07
  -1   0   9   30.15    4.32
   0   0  -9   37.30    4.49
   0   0   9   38.22    5.06
  -1   0  -9    4.69    3.06
  -1   0  -9    3.05    1.40
   1   0   9    3.01    3.47
  -2   0  -9   44.78    4.97
  -2   0  -9   42.62    3.01
   2   0   9   52.28    5.99
  -3   0  -9    9.46    2.12
   3   0   9   10.58    4.45
  -4   0  -9   22.34    2.46
  -4   0  -9   26.49    2.96
   4   0   9   17.74    5.13
  -5   0  -9   23.46    2.69
   5   0   9   26.06    5.55
  -6   0  -9    0.27    2.07
  -7   1   9    6.04    2.05
   6  -1  -9   -0.59    2.27
  -6   1   9    1.96    1.73
   5  -1  -9    6.33    2.83
  -5   1   9    4.02    1.63
   4  -1  -9   38.25    4.42
   3  -1  -9    7.25    3.01
   2  -1  -9  152.49    7.74
   1  -1  -9   15.31    3.74
  -1   1   9    8.20    3.31
   0  -1  -9   90.81    6.27
   0   1   9   92.97    6.62
  -1  -1  -9   13.60    1.82
  -1  -1  -9   14.58    3.74
   1   1   9   15.99    4.43
  -2  -1  -9    4.40    1.68
  -2  -1  -9    3.93    2.91
   2   1   9    1.83    3.94
  -3  -1  -9   19.61    2.54
   3   1   9   19.60    5.08
  -4  -1  -9    0.57    1.83
  -4  -1  -9    0.00    1.58
   4   1   9    0.08    4.29
   5   1   9    4.99    4.67
  -7   2   9    6.38    2.03
   6  -2  -9   32.96    4.14
  -6   2   9   26.80    2.69
   5  -2  -9   -0.47    2.43
  -5   2   9    1.37    1.55
   4  -2  -9   43.22    4.70
  -4   2   9   42.50    2.90
   3  -2  -9    3.03    2.72
   2  -2  -9   23.02    4.18
   1  -2  -9    1.56    2.91
  -1   2   9    4.68    3.30
   0  -2  -9   12.39    3.61
   0   2   9    6.17    3.91
  -1  -2  -9    2.10    2.92
   1   2   9    0.18    3.72
  -2  -2  -9   56.66    5.70
   2   2   9   55.81    6.61
   3   2   9    1.13    4.41
   4   2   9    7.66    4.84
   5   2   9    0.15    4.43
  -7   3   9    4.76    2.10
  -6   3   9    8.90    1.99
   5  -3  -9   18.20    3.84
  -5   3   9   13.44    2.01
   4  -3  -9   -0.20    2.59
  -4   3   9    2.99    1.45
   3  -3  -9    1.78    2.83
   2  -3  -9   28.47    4.65
   1  -3  -9   14.56    3.95
  -1   3   9   15.04    4.21
   0  -3  -9   11.76    4.05
   0   3   9   10.87    4.39
   1   3   9   36.33    6.18
   2   3   9   -1.65    4.18
   3   3   9   26.01    6.24
   4   3   9    6.29    5.08
   6  -4  -9   -1.65    3.40
  -4   4   9    0.56    1.44
   3  -4  -9   50.25    5.38
   2  -4  -9   -0.26    3.17
  -1   4   9   72.05    6.69
   0   4   9   10.33    4.74
  -1  -4  -9    2.33    5.04
   1   4   9   28.39    6.08
   2   4   9   48.99    7.52
   3   4   9   -4.50    4.61
   4   4   9   20.59    6.32
   5  -5  -9    1.08    4.52
   4  -5  -9    3.67    4.91
   3  -5  -9    5.31    5.23
   2  -5  -9    5.58    5.37
   1  -5  -9    3.92    5.35
   0  -5  -9   -2.89    4.95
   0   5   9    0.30    4.50
  -1  -5  -9   -2.86    4.62
   1   5   9   19.08    6.35
   2   5   9    3.79    5.71
   3   5   9   18.57    6.78
   4  -6  -9   -0.35    4.96
   3  -6  -9   -1.08    4.63
   2  -6  -9   -0.48    4.99
   1  -6  -9   -2.48    4.70
   0  -6  -9   -3.16    4.43
   0   6   9   -0.45    4.88
  -1  -6  -9   -3.25    3.99
   1   6   9    1.06    5.55
   2   6   9   -3.81    5.53
   2  -7  -9    5.93    4.86
   1  -7  -9   -4.23    5.17
   0  -7  -9    4.63    5.91
   1   7   9    3.53    6.05
   2   9 -10   27.54    5.72
   1   9 -10    0.44    3.85
   0   9 -10   10.17    4.69
   0  -9  10    7.38    5.41
   1  -9  10    5.17    5.40
   4   8 -10    2.38    3.79
   3   8 -10   13.74    4.60
   2   8 -10   -1.22    3.58
   1   8 -10   17.61    4.94
   0   8 -10   26.52    5.56
   0  -8  10   23.85    6.22
   1  -8  10    4.34    5.03
   2  -8  10   25.56    6.53
  -4   8 -10   13.25    2.36
  -6  -7  10   -0.03    1.84
  -5  -7  10   26.02    2.94
   4   7 -10   12.43    4.27
  -4  -7  10   10.61    2.27
   3   7 -10    5.97    3.80
  -3  -7  10    5.43    1.88
   2   7 -10   34.38    5.65
   1   7 -10    3.10    3.91
  -1  -7  10   -0.65    4.25
   0   7 -10   32.21    5.62
   0  -7  10   25.20    6.04
  -1   7 -10    1.28    3.56
   1  -7  10    4.52    4.96
   2  -7  10    0.34    4.85
   3  -7  10    0.84    4.69
  -4   7 -10    3.88    1.88
  -6  -6  10    1.14    2.04
   5   6 -10    1.69    3.15
  -5  -6  10    2.19    1.82
   4   6 -10    1.72    3.29
  -4  -6  10    2.97    1.91
   3   6 -10   35.69    5.45
   2   6 -10    3.59    3.48
   1   6 -10   32.29    5.42
  -1  -6  10   42.14    6.37
   0   6 -10    1.10    3.38
   0  -6  10   -0.25    4.23
  -1   6 -10    3.97    3.40
   1  -6  10   -1.33    4.28
   2  -6  10    5.90    4.97
   3  -6  10    9.66    5.36
  -4   6 -10    6.87    1.91
   4  -6  10    2.33    4.88
   6   5 -10    1.82    3.26
  -6  -5  10    1.02    2.03
   5   5 -10   13.80    4.06
  -5  -5  10    8.11    2.33
   4   5 -10   17.85    4.21
  -4  -5  10   14.22    2.38
   3   5 -10    2.21    3.14
   2   5 -10   32.43    5.20
   1   5 -10    8.85    3.83
  -1  -5  10    8.20    4.34
   0   5 -10    3.93    3.40
   0  -5  10    6.55    4.52
  -1   5 -10   66.41    5.99
   1  -5  10   59.66    7.03
   2  -5  10   -0.33    4.63
  -3   5 -10   55.77    3.87
   3  -5  10   33.52    6.58
  -4   5 -10    5.93    1.86
   4  -5  10    2.02    4.45
  -5   5 -10   16.14    2.51
   6   4 -10   49.67    5.27
  -6  -4  10   51.47    3.88
   5   4 -10    6.56    3.39
  -5  -4  10    5.25    1.97
   4   4 -10   37.65    5.10
  -4  -4  10   30.05    2.86
   3   4 -10   39.33    5.23
   2   4 -10    1.23    3.31
   1   4 -10   49.58    5.44
  -1  -4  10   48.84    5.82
   0   4 -10   -0.31    2.96
   0  -4  10    1.41    3.93
  -1   4 -10   20.72    4.26
   1  -4  10   22.49    5.68
   2  -4  10   -1.17    4.28
  -3   4 -10    3.25    1.88
   3  -4  10   -4.17    4.24
   4  -4  10   -0.58    4.28
  -5   4 -10    6.46    2.11
  -7  -3  10   -2.76    1.81
   6   3 -10    6.64    3.15
  -6  -3  10    4.73    2.04
   5   3 -10    2.96    3.06
  -5  -3  10    1.82    1.77
   4   3 -10    6.43    3.39
   3   3 -10    4.93    3.23
   2   3 -10   41.88    5.07
   1   3 -10    5.47    3.27
  -1  -3  10    0.19    3.18
   0   3 -10   18.36    4.04
   0  -3  10   24.68    5.23
  -1   3 -10   11.51    3.50
   1  -3  10    7.60    4.83
   2  -3  10    1.76    4.39
  -3   3 -10   23.34    2.88
   3  -3  10    9.26    4.88
  -4   3 -10    8.89    2.02
   4  -3  10    6.67    4.59
  -5   3 -10    1.55    1.80
   5  -3  10   -2.31    4.04
  -7  -2  10    0.12    1.97
   6   2 -10   15.55    3.61
  -6  -2  10   15.08    2.49
   5   2 -10    5.25    2.90
  -5  -2  10    5.96    1.93
   4   2 -10   13.56    3.64
   3   2 -10   11.66    3.50
   2   2 -10    0.20    2.67
   1   2 -10    4.28    2.93
  -1  -2  10    3.84    3.22
   0   2 -10   62.38    5.51
   0  -2  10   66.82    6.26
  -1   2 -10    0.35    2.77
   1  -2  10   -2.20    3.61
  -2   2 -10   99.12    4.55
   2  -2  10   86.61    7.48
  -3   2 -10    2.25    1.91
   3  -2  10    1.39    4.20
  -4   2 -10   34.32    3.47
  -4   2 -10   25.09    2.64
   4  -2  10   10.75    4.78
  -5   2 -10    6.36    2.08
   5  -2  10    7.09    4.75
  -7  -1  10   18.77    2.87
   6   1 -10    2.89    2.83
  -6  -1  10    2.81    1.88
   5   1 -10   30.15    4.36
  -5  -1  10   25.80    2.76
   4   1 -10   36.16    4.63
   3   1 -10   17.03    3.73
   2   1 -10   94.78    6.45
   1   1 -10    0.28    2.81
  -1  -1  10    0.49    3.03
   0   1 -10   54.76    5.36
   0  -1  10   56.50    5.97
  -1   1 -10    7.04    3.22
   1  -1  10    0.46    3.80
  -2   1 -10    9.16    2.05
   2  -1  10   13.24    5.00
  -3   1 -10    3.40    1.93
   3  -1  10   -1.25    4.15
  -4   1 -10    4.80    1.97
  -4   1 -10    8.60    2.45
   4  -1  10    5.67    4.33
  -5   1 -10    3.36    2.00
   5  -1  10   -2.42    4.11
  -7   0  10   12.14    2.49
   6   0 -10    2.60    2.80
  -6   0  10    0.17    1.71
   5   0 -10    1.52    2.69
  -5   0  10   -0.04    1.59
   4   0 -10   12.37    3.40
   3   0 -10   30.43    4.54
   2   0 -10   16.92    3.84
   1   0 -10   47.07    5.07
  -1   0  10   40.51    5.13
   0   0 -10    4.41    3.22
   0   0  10    1.07    3.36
  -1   0 -10    2.19    1.56
  -1   0 -10    3.51    3.36
   1   0  10    3.48    3.94
  -2   0 -10   22.85    2.54
   2   0  10   17.37    5.20
  -3   0 -10    4.94    2.01
   3   0  10    3.25    4.44
  -4   0 -10    6.04    2.22
  -4   0 -10    6.74    2.00
   4   0  10    3.51    4.44
  -5   0 -10    4.28    2.17
  -7   1  10    2.91    2.04
   6  -1 -10    3.86    2.81
  -6   1  10    4.33    1.89
   5  -1 -10   20.97    3.98
  -5   1  10   19.09    2.40
   4  -1 -10    6.19    3.32
   3  -1 -10   18.31    4.02
   2  -1 -10    4.54    3.24
   1  -1 -10    6.60    3.59
  -1   1  10    3.39    3.40
   0  -1 -10    2.23    3.20
   0   1  10   -1.46    3.40
  -1  -1 -10   54.90    5.67
   1   1  10   59.69    6.41
   2   1  10    1.95    4.23
   3   1  10   59.04    7.03
   4   1  10    2.49    4.69
  -7   2  10   -1.38    1.93
   6  -2 -10   32.55    4.49
  -6   2  10   30.90    2.99
   5  -2 -10    0.50    2.62
  -5   2  10    2.13    1.63
   4  -2 -10   12.91    3.72
   3  -2 -10   32.58    4.79
   2  -2 -10   11.96    4.01
   1  -2 -10   74.09    6.30
  -1   2  10   73.82    6.53
   0  -2 -10    1.39    3.14
   0   2  10    1.43    4.01
  -1  -2 -10   51.39    5.71
   1   2  10   53.37    7.15
   2   2  10    3.36    4.76
   3   2  10   -1.05    4.56
   4   2  10    4.81    4.83
  -6   3  10    6.37    2.11
   5  -3 -10   10.07    3.52
  -5   3  10    9.30    2.10
   4  -3 -10    2.14    3.14
  -4   3  10    4.11    1.67
   3  -3 -10   27.30    4.84
   2  -3 -10   18.35    4.46
   1  -3 -10    1.58    3.46
  -1   3  10    1.77    3.79
   0  -3 -10    3.25    3.73
   0   3  10    3.94    4.32
   1   3  10   16.69    5.78
   2   3  10   -0.32    4.89
   3   3  10   17.01    6.14
   0   4  10   19.57    5.75
  -1  -4 -10    2.72    5.63
   1   4  10   14.89    5.80
   2   4  10   38.44    7.68
   3   4  10    0.19    5.40
   4  -5 -10   -1.73    4.98
   3  -5 -10   -0.29    5.31
   2  -5 -10    3.93    5.39
   1  -5 -10   -3.29    5.15
   0  -5 -10    1.70    5.35
   0   5  10   31.41    6.82
   1   5  10   -2.11    5.34
   2   5  10    9.19    6.53
   2  -6 -10   -2.85    4.91
   1  -6 -10   -0.26    4.87
   0  -6 -10   -4.05    4.49
   1   6  10   -4.96    5.45
   0   9 -11    1.11    4.75
   2   8 -11    3.43    4.38
   1   8 -11    5.54    4.69
   0   8 -11    0.30    4.09
   0  -8  11    2.17    5.30
   1  -8  11    8.93    5.72
  -5  -7  11   -1.26    1.91
   4   7 -11   18.29    4.99
  -4  -7  11   15.56    2.62
   3   7 -11    2.56    3.89
  -3  -7  11    0.44    1.90
   2   7 -11   53.81    6.99
   1   7 -11    5.00    4.44
   0   7 -11   15.14    5.09
   0  -7  11   12.06    5.75
   1  -7  11   23.90    6.77
   2  -7  11    0.27    5.20
  -5  -6  11    1.37    2.01
   4   6 -11   16.62    4.84
  -4  -6  11   15.91    2.63
   3   6 -11    1.46    3.66
   2   6 -11    0.68    3.99
   1   6 -11    8.90    4.53
   0   6 -11    6.27    4.10
   0  -6  11    9.15    5.55
  -1   6 -11   10.30    4.32
   1  -6  11    6.20    5.54
   2  -6  11   17.11    6.40
   3  -6  11    1.80    5.08
  -4   6 -11    8.03    2.18
  -6  -5  11    5.22    2.51
   5   5 -11    3.18    3.48
  -5  -5  11    1.40    2.01
   4   5 -11   11.71    4.26
  -4  -5  11    5.06    2.11
   3   5 -11   -0.17    3.61
   2   5 -11   31.53    5.59
   1   5 -11    2.80    3.71
  -1  -5  11    2.84    4.32
   0   5 -11   20.76    4.99
   0  -5  11   21.54    6.04
  -1   5 -11   19.40    4.63
   1  -5  11   16.89    5.84
   2  -5  11    2.82    5.02
   3  -5  11   -0.18    4.88
  -4   5 -11    7.22    2.08
  -6  -4  11   -1.02    1.94
   5   4 -11    7.48    3.72
  -5  -4  11    6.77    2.22
   4   4 -11    2.77    3.39
  -4  -4  11    5.34    2.06
   3   4 -11   45.27    5.93
   2   4 -11   -0.19    3.37
   1   4 -11   45.15    5.67
  -1  -4  11   52.71    6.73
   0   4 -11   26.11    4.90
   0  -4  11   21.10    5.84
  -1   4 -11   13.23    4.02
   1  -4  11   19.70    5.99
   2  -4  11   29.01    6.57
   3  -4  11    0.90    4.65
  -4   4 -11   22.93    2.70
   4  -4  11    6.51    4.55
   6   3 -11    3.70    3.01
  -6  -3  11   -0.59    1.94
   5   3 -11   43.62    5.15
  -5  -3  11   43.23    3.60
   4   3 -11    5.14    3.51
   3   3 -11   39.97    5.51
   2   3 -11    5.51    3.68
   1   3 -11    1.35    3.20
  -1  -3  11    0.60    3.44
   0   3 -11    4.65    3.54
   0  -3  11    7.77    4.67
  -1   3 -11   30.44    4.99
   1  -3  11   21.67    5.74
  -2   3 -11   12.25    2.38
   2  -3  11   10.10    5.09
   3  -3  11    6.05    4.85
  -4   3 -11    1.53    1.81
   4  -3  11   -0.23    4.01
   6   2 -11    2.53    3.12
  -6  -2  11    5.07    2.18
   5   2 -11    2.72    2.98
  -5  -2  11    1.77    1.87
   4   2 -11   -0.09    2.71
   3   2 -11   14.97    3.99
   2   2 -11    1.00    3.13
   1   2 -11   36.17    5.44
  -1  -2  11   37.16    5.56
   0   2 -11    1.42    3.30
   0  -2  11    1.61    3.88
  -1   2 -11    8.46    3.69
   1  -2  11    5.74    4.68
  -2   2 -11    0.00    1.70
   2  -2  11   -0.85    4.39
  -3   2 -11    2.13    2.06
   3  -2  11    2.69    4.56
  -4   2 -11   -2.41    1.62
   4  -2  11   -1.12    4.23
   6   1 -11    3.68    3.04
  -6  -1  11    1.62    1.95
   5   1 -11    7.29    3.48
  -5  -1  11    3.78    1.91
   4   1 -11   18.75    4.26
   3   1 -11    5.44    3.55
   2   1 -11   45.53    5.77
   1   1 -11   14.51    4.18
  -1  -1  11   12.98    4.24
   0   1 -11   25.17    4.65
   0  -1  11   15.44    5.05
  -1   1 -11   47.42    5.51
  -1   1 -11   43.70    3.16
   1  -1  11   42.81    6.86
  -2   1 -11    1.48    1.82
   2  -1  11    3.75    4.74
  -3   1 -11   43.04    3.58
   3  -1  11   21.75    5.69
  -4   1 -11   -0.37    1.78
   4  -1  11   -2.17    4.14
   6   0 -11   32.32    4.67
  -6   0  11   25.09    2.96
   5   0 -11   -1.07    2.80
  -5   0  11   -0.39    1.67
   4   0 -11   31.42    4.86
   3   0 -11    2.42    3.22
   2   0 -11   24.44    4.68
   1   0 -11   38.88    5.60
  -1   0  11   35.75    5.59
   0   0 -11    2.28    3.51
   0   0  11    0.14    3.85
  -1   0 -11   39.16    5.46
   1   0  11   29.75    6.10
   2   0  11   18.37    5.76
   3   0  11    1.34    4.49
  -4   0 -11    7.39    2.15
   6  -1 -11   10.06    3.50
  -6   1  11    5.64    2.17
   5  -1 -11    0.43    2.76
  -5   1  11    1.69    1.88
   4  -1 -11    2.35    3.27
   3  -1 -11    1.68    3.35
   2  -1 -11   41.63    5.70
   1  -1 -11    5.20    3.74
  -1   1  11    4.53    4.05
   0  -1 -11   37.86    5.62
   0   1  11   32.62    6.10
  -1  -1 -11    0.87    3.35
   1   1  11    2.67    4.66
   2   1  11    0.60    4.79
   3   1  11   -1.14    4.68
  -6   2  11   -0.19    1.78
   5  -2 -11    7.98    3.39
  -5   2  11    9.20    2.18
   4  -2 -11   13.18    3.93
   3  -2 -11   18.41    4.45
   2  -2 -11    5.00    3.74
   1  -2 -11   11.89    4.35
   0  -2 -11   16.84    4.65
   0   2  11   13.28    5.28
  -1  -2 -11    2.99    3.81
   1   2  11    2.98    4.93
   2   2  11   37.11    7.17
   3   2  11    3.13    5.29
  -6   3  11    1.39    1.90
   5  -3 -11   27.63    4.74
  -5   3  11   25.47    2.79
   4  -3 -11    4.71    3.68
  -4   3  11    3.70    1.76
   3  -3 -11   25.78    5.00
   2  -3 -11   13.26    4.54
   1  -3 -11   -4.00    3.35
   0  -3 -11   26.07    5.41
   0   3  11   32.48    6.46
   1   3  11    2.56    5.21
   2   3  11    6.81    5.79
   0   4  11    2.81    5.16
   1   4  11    6.80    5.95
   1  -5 -11    1.52    5.70
   0   8 -12    7.94    4.87
  -4  -7  12   -0.07    2.07
  -3  -7  12    5.44    2.33
   2   7 -12    3.02    4.43
   1   7 -12    1.19    4.33
   0   7 -12    3.36    4.51
   0  -7  12    1.04    5.46
   1  -7  12    7.21    6.34
  -4  -6  12    1.46    2.22
   3   6 -12   36.17    6.29
   2   6 -12    1.91    4.19
   1   6 -12   53.73    7.29
   0   6 -12    5.98    4.43
   0  -6  12    7.23    5.64
   1  -6  12   14.65    6.38
   2  -6  12    7.28    5.89
  -5  -5  12   21.49    3.26
   4   5 -12    8.89    4.34
  -4  -5  12    2.63    2.10
   3   5 -12   15.21    4.76
   2   5 -12    4.75    4.33
   1   5 -12   -1.52    3.74
   0   5 -12   -1.31    3.52
   0  -5  12   -0.57    4.82
   1  -5  12   11.75    6.11
   2  -5  12    2.76    5.59
  -5  -4  12    1.11    2.07
   4   4 -12   11.72    4.35
  -4  -4  12    6.10    2.28
   3   4 -12    0.01    3.47
   2   4 -12    1.75    3.80
   1   4 -12   17.35    4.91
   0   4 -12   15.80    4.56
   0  -4  12   12.88    5.60
  -1   4 -12    7.70    4.18
   1  -4  12    5.83    5.05
   2  -4  12   12.55    5.90
   5   3 -12    0.92    3.24
  -5  -3  12    0.97    2.00
   4   3 -12   18.79    4.57
   3   3 -12   -0.13    3.30
   2   3 -12   44.91    6.06
   1   3 -12    0.25    3.55
   0   3 -12   42.74    6.23
   0  -3  12   32.53    6.49
  -1   3 -12    4.55    3.77
   1  -3  12    9.44    5.30
   2  -3  12    9.23    5.36
   3  -3  12   11.90    5.57
   5   2 -12    0.67    3.30
  -5  -2  12   -0.17    1.82
   4   2 -12   28.04    5.25
   3   2 -12    1.06    3.46
   2   2 -12   13.44    4.61
   1   2 -12    2.39    3.80
   0   2 -12    0.59    3.46
   0  -2  12    7.54    4.99
  -1   2 -12    0.23    3.45
   1  -2  12    3.45    4.89
   2  -2  12   19.15    6.19
   3  -2  12    1.05    4.87
   5   1 -12    8.63    3.68
  -5  -1  12    4.79    2.13
   4   1 -12   -1.43    3.10
   3   1 -12    5.86    3.68
   2   1 -12    8.43    3.99
   1   1 -12    5.41    3.91
   0   1 -12   17.04    4.71
   0  -1  12   12.11    5.27
  -1   1 -12    8.87    4.26
   1  -1  12    8.90    5.18
   2  -1  12    0.88    4.93
   5   0 -12    1.56    3.29
  -5   0  12    3.78    2.03
   4   0 -12   -0.12    3.16
   3   0 -12   30.87    5.23
   2   0 -12    0.02    3.63
   1   0 -12   55.93    6.26
   0   0 -12    2.78    3.83
   0   0  12    0.54    4.36
  -1   0 -12   31.55    5.67
   1   0  12   30.93    6.52
   2   0  12   14.61    5.75
  -5   1  12   20.41    2.91
   4  -1 -12    3.51    3.45
   3  -1 -12   28.27    5.06
   2  -1 -12    0.52    3.56
   1  -1 -12    1.24    3.77
   0  -1 -12   11.03    4.43
   0   1  12    6.27    5.13
   1   1  12    6.35    5.32
   2   1  12    5.05    5.48
  -5   2  12    0.99    1.98
   4  -2 -12    2.92    3.45
   3  -2 -12   -1.83    3.35
   2  -2 -12    4.20    3.93
   1  -2 -12   15.16    4.87
   0  -2 -12    6.92    4.34
   0   2  12   12.60    5.47
   1   2  12    8.52    5.61
  -4   3  12    6.19    2.08
   3  -3 -12    0.91    3.83
   2  -3 -12   29.10    5.74
   1  -3 -12    0.73    3.86
   1   3  12    4.08    5.89
   1   6 -13    0.00    4.15
   0   6 -13   25.43    5.67
  -4  -5  13    6.56    2.51
   2   5 -13   33.37    6.24
   1   5 -13    3.19    4.15
   0   5 -13   50.38    6.81
   1  -5  13    0.15    5.48
  -4  -4  13    8.22    2.53
   3   4 -13    5.38    4.15
   2   4 -13    7.10    4.39
   1   4 -13    9.71    4.60
   0   4 -13    2.42    4.20
   0  -4  13    1.83    4.99
   1  -4  13    0.25    5.10
   3   3 -13    8.04    4.43
   2   3 -13    0.25    3.96
   1   3 -13   -0.21    3.92
   0   3 -13   -0.51    3.73
   0  -3  13   -1.47    4.77
   1  -3  13    9.52    5.86
   3   2 -13    7.18    4.38
   2   2 -13    4.12    4.23
   1   2 -13   40.95    6.27
   0   2 -13   -1.63    3.50
   0  -2  13    0.09    4.69
   1  -2  13   22.76    6.51
   3   1 -13    8.08    4.37
   2   1 -13    6.29    4.48
   1   1 -13    1.54    4.07
   0   1 -13    3.67    4.21
   0  -1  13    4.58    5.04
   1  -1  13    1.59    5.10
   3   0 -13    1.23    3.88
   2   0 -13    4.89    4.25
   1   0 -13   -0.75    3.83
   0   0 -13   12.87    4.76
   1   0  13   -1.19    5.23
   2  -1 -13   28.06    5.81
   1  -1 -13   -2.30    3.79
   0  -1 -13   43.22    6.37
   0   0   0    0.00    0.00
;
_shelx_hkl_checksum   56592
