# Supplementary material
Source: MDPI journal article supplement (https://www.mdpi.com/2304-6740/7/10/122)
Supplement: s1 [file s1 › MgH10As4O16.cif]

data_global       

_publ_contact_author_name
  
;       
Matthias Weil       
;       
  
_publ_contact_author_address  
  
;  
Institute for Chemical Technologies and Analytics
Division of Structural Chemistry
TU Wien
Getreidemarkt 9/164-SC
A-1060 Vienna
Austria       
;  
  
_publ_contact_author_phone      '+43 1 58801 17122'
_publ_contact_author_fax        '+43 1 58801 17199'  
_publ_contact_author_email      'matthias.weil@tuwien.ac.at'
_publ_contact_letter
;
Please consider this CIF submission as supporting information
for Inorganic Chemistry.
;
_publ_requested_journal
;
data deposition
;
_publ_requested_category
;
;
_publ_requested_coeditor_name   ?
_journal_date_recd_electronic      ?
_journal_date_to_coeditor       ?
_journal_date_from_coeditor     ?       
_journal_date_accepted     ?
_journal_date_printers_first    ?       
_journal_date_printers_final    ?       
_journal_date_proofs_out        ?       
_journal_date_proofs_in ?       
_journal_coeditor_name  ?       
_journal_coeditor_code     ?
_journal_paper_category      ?
_journal_coeditor_notes   ?       
_journal_techeditor_code      ?
_iucr_compatibility_tag          ?
_journal_techeditor_notes ?       
_journal_coden_ASTM     ?       
_journal_name_full      ?       
_journal_year   ?       
_journal_volume ?       
_journal_issue  ?       
_journal_page_first     ?       
_journal_page_last      ?       
_journal_suppl_publ_number      ?       
_journal_suppl_publ_pages       ?       
  
_publ_section_title             
;   
data deposition
;
loop_       
  
 _publ_author_name       
 _publ_author_address       

'Weil, Matthias'
;  
Institute for Chemical Technologies and Analytics
Division of Structural Chemistry
TU Wien
Getreidemarkt 9/164-SC
A-1060 Vienna
Austria       
; 

_publ_section_abstract
;
;
_publ_section_comment
;
;
_publ_section_exptl_prep
;
;

_publ_section_exptl_refinement
;
;

_publ_section_references
;


;
_publ_section_acknowledgements
;
;

_publ_section_figure_captions
;
; 
data_MgH10As4O16
 
_audit_creation_method            'SHELXL-2018/3'
_shelx_SHELXL_version_number      '2018/3'
_chemical_name_systematic         ?
_chemical_name_common             ?
_chemical_melting_point           ?
_chemical_formula_moiety          ?
_chemical_formula_sum
 'As4 H10 Mg O16' 
_chemical_formula_weight          590.07

loop_
 _atom_type_symbol
 _atom_type_description
 _atom_type_scat_dispersion_real
 _atom_type_scat_dispersion_imag
 _atom_type_scat_source
 'O'  'O'   0.0106   0.0060
 'International Tables Vol C Tables 4.2.6.8 and 6.1.1.4'
 'H'  'H'   0.0000   0.0000
 'International Tables Vol C Tables 4.2.6.8 and 6.1.1.4'
 'Mg'  'Mg'   0.0486   0.0363
 'International Tables Vol C Tables 4.2.6.8 and 6.1.1.4'
 'As'  'As'   0.0499   2.0058
 'International Tables Vol C Tables 4.2.6.8 and 6.1.1.4'
 
_space_group_crystal_system       triclinic
_space_group_IT_number            2
_space_group_name_H-M_alt         'P -1'
_space_group_name_Hall            '-P 1'
 
_shelx_space_group_comment
;
The symmetry employed for this shelxl refinement is uniquely defined
by the following loop, which should always be used as a source of
symmetry information in preference to the above space-group names.
They are only intended as comments.
;
 
loop_
 _space_group_symop_operation_xyz
 'x, y, z'
 '-x, -y, -z'
 
_cell_length_a                    5.4558(3)
_cell_length_b                    7.3180(4)
_cell_length_c                    8.3382(5)
_cell_angle_alpha                 100.231(2)
_cell_angle_beta                  98.614(2)
_cell_angle_gamma                 93.022(2)
_cell_volume                      322.84(3)
_cell_formula_units_Z             1
_cell_measurement_temperature     100(2)
_cell_measurement_reflns_used     5057
_cell_measurement_theta_min       2.838
_cell_measurement_theta_max       41.199
 
_exptl_crystal_description        plate
_exptl_crystal_colour             colourless
_exptl_crystal_density_meas       ?
_exptl_crystal_density_method     ?
_exptl_crystal_density_diffrn     3.035          
_exptl_crystal_F_000              282
_exptl_transmission_factor_min    ?
_exptl_transmission_factor_max    ?
_exptl_crystal_size_max           0.100
_exptl_crystal_size_mid           0.060
_exptl_crystal_size_min           0.010
_exptl_absorpt_coefficient_mu     10.399
_shelx_estimated_absorpt_T_min    0.423
_shelx_estimated_absorpt_T_max    0.903
_exptl_absorpt_correction_type    multi-scan
_exptl_absorpt_correction_T_min   0.5308  
_exptl_absorpt_correction_T_max   0.7482
_exptl_absorpt_process_details    SADABS
_exptl_absorpt_special_details    ?
_diffrn_ambient_temperature       100(2)
_diffrn_radiation_wavelength      0.71073
_diffrn_radiation_type            MoK\a
_diffrn_source                    ?
_diffrn_measurement_device_type   'Bruker APEX-II CCD'
_diffrn_measurement_method        '\w-scans'
_diffrn_detector_area_resol_mean  ?
_diffrn_reflns_number             19986
_diffrn_reflns_av_unetI/netI      0.0663
_diffrn_reflns_av_R_equivalents   0.0656
_diffrn_reflns_limit_h_min        -10
_diffrn_reflns_limit_h_max        10
_diffrn_reflns_limit_k_min        -13
_diffrn_reflns_limit_k_max        13
_diffrn_reflns_limit_l_min        -15
_diffrn_reflns_limit_l_max        15
_diffrn_reflns_theta_min          3.790
_diffrn_reflns_theta_max          41.890
_diffrn_reflns_theta_full         25.242
_diffrn_measured_fraction_theta_max   0.988
_diffrn_measured_fraction_theta_full  0.997
_diffrn_reflns_Laue_measured_fraction_max    0.988
_diffrn_reflns_Laue_measured_fraction_full   0.997
_diffrn_reflns_point_group_measured_fraction_max   0.988
_diffrn_reflns_point_group_measured_fraction_full  0.997
_reflns_number_total              4436
_reflns_number_gt                 3262
_reflns_threshold_expression      'I > 2\s(I)'
_reflns_Friedel_coverage          0.000
_reflns_Friedel_fraction_max      .
_reflns_Friedel_fraction_full     .
 
_reflns_special_details
;
 Reflections were merged by SHELXL according to the crystal
 class for the calculation of statistics and refinement.
 
 _reflns_Friedel_fraction is defined as the number of unique
 Friedel pairs measured divided by the number that would be
 possible theoretically, ignoring centric projections and
 systematic absences.
;
 
_computing_data_collection        'APEX2 (Bruker, 2012)'
_computing_cell_refinement        'SAINT (Bruker, 2012)'
_computing_data_reduction         'SAINT (Bruker, 2012)'
_computing_structure_solution     'SHELXS (Sheldrick, 2008)'
_computing_structure_refinement 'SHELXL-2018/3 (Sheldrick, 2018)'
_computing_molecular_graphics     ?
_computing_publication_material   ?
_refine_special_details           ?
_refine_ls_structure_factor_coef  Fsqd
_refine_ls_matrix_type            full
_refine_ls_weighting_scheme       calc
_refine_ls_weighting_details
'w=1/[\s^2^(Fo^2^)+(0.0229P)^2^] where P=(Fo^2^+2Fc^2^)/3'
_atom_sites_solution_primary      ?
_atom_sites_solution_secondary    ?
_atom_sites_solution_hydrogens    difmap
_refine_ls_hydrogen_treatment     refall
_refine_ls_extinction_method      none
_refine_ls_extinction_coef        .
_refine_ls_number_reflns          4436
_refine_ls_number_parameters      113
_refine_ls_number_restraints      5
_refine_ls_R_factor_all           0.0622
_refine_ls_R_factor_gt            0.0353
_refine_ls_wR_factor_ref          0.0712
_refine_ls_wR_factor_gt           0.0647
_refine_ls_goodness_of_fit_ref    1.019
_refine_ls_restrained_S_all       1.019
_refine_ls_shift/su_max           0.001
_refine_ls_shift/su_mean          0.000
 
loop_
 _atom_site_label
 _atom_site_type_symbol
 _atom_site_fract_x
 _atom_site_fract_y
 _atom_site_fract_z
 _atom_site_U_iso_or_equiv
 _atom_site_adp_type
 _atom_site_occupancy
 _atom_site_site_symmetry_order  
 _atom_site_calc_flag
 _atom_site_refinement_flags_posn
 _atom_site_refinement_flags_adp
 _atom_site_refinement_flags_occupancy
 _atom_site_disorder_assembly
 _atom_site_disorder_group
Mg1 Mg 0.000000 0.000000 0.000000 0.00555(16) Uani 1 2 d S . P . .
As1 As 0.04450(4) 0.32112(3) 0.74646(2) 0.00546(4) Uani 1 1 d . . . . .
As2 As 0.42522(4) 0.82805(3) 0.77789(2) 0.00473(4) Uani 1 1 d . . . . .
O1 O 0.8855(3) 0.50871(19) 0.72414(19) 0.0093(3) Uani 1 1 d D . . . .
O2 O 0.0958(3) 0.2298(2) 0.55210(18) 0.0112(3) Uani 1 1 d D . . . .
O3 O 0.8887(3) 0.1667(2) 0.82254(18) 0.0089(3) Uani 1 1 d . . . . .
O4 O 0.3193(3) 0.4026(2) 0.86956(19) 0.0103(3) Uani 1 1 d D . . . .
O5 O 0.6606(3) 0.83973(19) 0.93093(17) 0.0071(2) Uani 1 1 d . . . . .
O6 O 0.4339(3) 0.6406(2) 0.62402(18) 0.0102(3) Uani 1 1 d D . . . .
O7 O 0.1421(3) 0.81463(19) 0.82685(18) 0.0071(2) Uani 1 1 d . . . . .
O8 O 0.4510(3) 1.0189(2) 0.68622(19) 0.0096(3) Uani 1 1 d D . . . .
H1 H 0.204(6) 0.146(5) 0.570(5) 0.064(6) Uiso 1 1 d D U . . .
H2 H 0.979(7) 0.616(3) 0.767(5) 0.064(6) Uiso 1 1 d D U . . .
H3 H 0.343(9) 0.334(5) 0.948(4) 0.064(6) Uiso 1 1 d D U . . .
H4 H 0.541(6) 0.563(5) 0.659(5) 0.064(6) Uiso 1 1 d D U . . .
H5 H 0.599(4) 1.078(5) 0.732(5) 0.064(6) Uiso 1 1 d D U . . .
 
loop_
 _atom_site_aniso_label
 _atom_site_aniso_U_11
 _atom_site_aniso_U_22
 _atom_site_aniso_U_33
 _atom_site_aniso_U_23
 _atom_site_aniso_U_13
 _atom_site_aniso_U_12
Mg1 0.0054(4) 0.0052(4) 0.0056(4) 0.0002(3) 0.0007(3) 0.0001(3)
As1 0.00562(8) 0.00445(8) 0.00617(8) 0.00140(6) 0.00018(6) -0.00013(6)
As2 0.00449(8) 0.00460(8) 0.00496(8) 0.00059(6) 0.00060(6) 0.00045(6)
O1 0.0074(6) 0.0056(6) 0.0140(7) 0.0015(5) -0.0009(5) 0.0004(5)
O2 0.0137(7) 0.0125(7) 0.0078(6) 0.0015(5) 0.0025(5) 0.0044(6)
O3 0.0078(6) 0.0080(6) 0.0111(6) 0.0046(5) 0.0004(5) -0.0020(5)
O4 0.0090(6) 0.0109(6) 0.0105(6) 0.0038(5) -0.0017(5) -0.0014(5)
O5 0.0068(6) 0.0075(6) 0.0069(5) 0.0023(5) -0.0001(5) 0.0005(5)
O6 0.0113(7) 0.0097(6) 0.0080(6) -0.0029(5) 0.0006(5) 0.0041(5)
O7 0.0059(6) 0.0062(5) 0.0086(6) -0.0005(5) 0.0019(5) -0.0002(5)
O8 0.0082(6) 0.0090(6) 0.0120(6) 0.0060(5) -0.0014(5) -0.0014(5)
 
_geom_special_details
;
 All esds (except the esd in the dihedral angle between two l.s. planes)
 are estimated using the full covariance matrix.  The cell esds are taken
 into account individually in the estimation of esds in distances, angles
 and torsion angles; correlations between esds in cell parameters are only
 used when they are defined by crystal symmetry.  An approximate (isotropic)
 treatment of cell esds is used for estimating esds involving l.s. planes.
;
 
loop_
 _geom_bond_atom_site_label_1
 _geom_bond_atom_site_label_2
 _geom_bond_distance
 _geom_bond_site_symmetry_2
 _geom_bond_publ_flag
Mg1 O7 2.0680(13) 2_566 ?
Mg1 O7 2.0680(13) 1_544 ?
Mg1 O5 2.0853(14) 2_666 ?
Mg1 O5 2.0853(14) 1_444 ?
Mg1 O3 2.1205(14) 1_454 ?
Mg1 O3 2.1205(14) 2_656 ?
As1 O3 1.6484(14) 1_455 ?
As1 O1 1.6852(14) 1_455 ?
As1 O4 1.6983(16) . ?
As1 O2 1.7096(15) . ?
As2 O5 1.6562(15) . ?
As2 O7 1.6579(14) . ?
As2 O6 1.7119(14) . ?
As2 O8 1.7161(15) . ?
O1 H2 0.899(10) . ?
O2 H1 0.889(10) . ?
O4 H3 0.892(10) . ?
O6 H4 0.890(10) . ?
O8 H5 0.895(10) . ?
 
loop_
 _geom_angle_atom_site_label_1
 _geom_angle_atom_site_label_2
 _geom_angle_atom_site_label_3
 _geom_angle
 _geom_angle_site_symmetry_1
 _geom_angle_site_symmetry_3
 _geom_angle_publ_flag
O7 Mg1 O7 180.00(8) 2_566 1_544 ?
O7 Mg1 O5 88.29(5) 2_566 2_666 ?
O7 Mg1 O5 91.71(5) 1_544 2_666 ?
O7 Mg1 O5 91.71(5) 2_566 1_444 ?
O7 Mg1 O5 88.29(5) 1_544 1_444 ?
O5 Mg1 O5 180.00(7) 2_666 1_444 ?
O7 Mg1 O3 88.88(6) 2_566 1_454 ?
O7 Mg1 O3 91.12(6) 1_544 1_454 ?
O5 Mg1 O3 89.76(5) 2_666 1_454 ?
O5 Mg1 O3 90.24(5) 1_444 1_454 ?
O7 Mg1 O3 91.12(6) 2_566 2_656 ?
O7 Mg1 O3 88.88(6) 1_544 2_656 ?
O5 Mg1 O3 90.24(5) 2_666 2_656 ?
O5 Mg1 O3 89.76(5) 1_444 2_656 ?
O3 Mg1 O3 180.00(7) 1_454 2_656 ?
O3 As1 O1 112.33(7) 1_455 1_455 ?
O3 As1 O4 112.13(7) 1_455 . ?
O1 As1 O4 106.42(7) 1_455 . ?
O3 As1 O2 110.93(7) 1_455 . ?
O1 As1 O2 104.87(7) 1_455 . ?
O4 As1 O2 109.82(8) . . ?
O5 As2 O7 116.47(7) . . ?
O5 As2 O6 111.36(7) . . ?
O7 As2 O6 106.30(7) . . ?
O5 As2 O8 109.64(7) . . ?
O7 As2 O8 107.42(7) . . ?
O6 As2 O8 104.95(7) . . ?
As1 O1 H2 112(3) 1_655 . ?
As1 O2 H1 103(3) . . ?
As1 O3 Mg1 132.19(8) 1_655 1_656 ?
As1 O4 H3 107(3) . . ?
As2 O5 Mg1 133.70(8) . 1_666 ?
As2 O6 H4 110(3) . . ?
As2 O7 Mg1 127.11(8) . 1_566 ?
As2 O8 H5 105(3) . . ?
 
loop_
 _geom_hbond_atom_site_label_D 
 _geom_hbond_atom_site_label_H 
 _geom_hbond_atom_site_label_A 
 _geom_hbond_distance_DH 
 _geom_hbond_distance_HA 
 _geom_hbond_distance_DA 
 _geom_hbond_angle_DHA 
 _geom_hbond_site_symmetry_A 
 _geom_hbond_publ_flag
O2 H1 O8  0.889(10) 1.918(18) 2.769(2) 160(4) 1_545 yes
O1 H2 O7  0.899(10) 1.620(11) 2.517(2) 174(4) 1_655 yes
O4 H3 O5  0.892(10) 1.758(14) 2.634(2) 167(4) 2_667 yes
O6 H4 O1  0.890(10) 1.96(2) 2.760(2) 149(4) . yes
O8 H5 O3  0.895(10) 1.686(11) 2.577(2) 174(4) 1_565 yes
 
_refine_diff_density_max    1.212
_refine_diff_density_min   -1.445
_refine_diff_density_rms    0.260

_shelx_res_file
;
TITL test_a.res in P-1
    isotypic_final.res
    created by SHELXL-2018/3 at 13:00:36 on 18-Aug-2019
REM Old TITL test in P-1

REM SHELXT solution in P-1
REM R1 0.028,  Rweak 0.005,  Alpha 0.041,  Orientation as input
REM Formula found by SHELXT:  As4 Mg O16

CELL  0.71073   5.4558   7.3180   8.3382  100.231   98.614   93.022
ZERR    1.000   0.0003   0.0004   0.0005    0.002    0.002    0.002
LATT  1
SFAC O H MG AS
UNIT 16 10 1 4
TEMP -173
L.S. 14
BOND
FMAP 2
PLAN 10
acta
size 0.10 0.06 0.01
rem farbloses Pleattchen
rem Koordinaten aufgestellt entsprechend der isotypen Cu-Vbd sowie wie Ni und Mn
bond $H
htab
dfix 0.90 0.01 O1 H2
dfix 0.90 0.01 O6 H4
dfix 0.90 0.01 O2 H1
dfix 0.90 0.01 O4 H3
dfix 0.90 0.01 O8 H5
EQIV $15 x, y-1, z
HTAB O2 O8_$15
EQIV $2 x+1, y, z
HTAB O1 O7_$2
EQIV $16 -x+1, -y+1, -z+2
HTAB O4 O5_$16
HTAB O6 O1
EQIV $7 -x+1, -y+1, -z+1
HTAB O6 O6_$7
EQIV $17 x, y+1, z
HTAB O8 O3_$17
acta
WGHT    0.022900
FVAR       0.81492   0.06386
MG1   3    0.000000    0.000000    0.000000    10.50000    0.00543    0.00521 =
         0.00564    0.00021    0.00075    0.00015
AS1   4    0.044502    0.321116    0.746464    11.00000    0.00562    0.00445 =
         0.00617    0.00140    0.00018   -0.00013
AS2   4    0.425216    0.828048    0.777891    11.00000    0.00449    0.00460 =
         0.00496    0.00059    0.00060    0.00045
O1    1    0.885497    0.508711    0.724139    11.00000    0.00743    0.00557 =
         0.01402    0.00148   -0.00086    0.00037
O2    1    0.095804    0.229768    0.552096    11.00000    0.01372    0.01254 =
         0.00780    0.00153    0.00253    0.00441
O3    1    0.888670    0.166696    0.822542    11.00000    0.00785    0.00805 =
         0.01112    0.00462    0.00039   -0.00200
O4    1    0.319278    0.402643    0.869562    11.00000    0.00899    0.01088 =
         0.01050    0.00376   -0.00170   -0.00141
O5    1    0.660554    0.839735    0.930935    11.00000    0.00684    0.00750 =
         0.00695    0.00234   -0.00011    0.00051
O6    1    0.433920    0.640554    0.624021    11.00000    0.01131    0.00975 =
         0.00795   -0.00288    0.00063    0.00407
O7    1    0.142134    0.814629    0.826852    11.00000    0.00591    0.00618 =
         0.00864   -0.00050    0.00192   -0.00022
O8    1    0.450993    1.018879    0.686222    11.00000    0.00821    0.00900 =
         0.01196    0.00598   -0.00140   -0.00143
H1    2    0.203916    0.146101    0.570273    11.00000   21.00000
H2    2    0.978581    0.616271    0.767138    11.00000   21.00000
H3    2    0.342598    0.333587    0.947731    11.00000   21.00000
H4    2    0.540722    0.562675    0.658821    11.00000   21.00000
H5    2    0.599491    1.077762    0.732313    11.00000   21.00000
HKLF 4


REM  test_a.res in P-1
REM wR2 = 0.0712, GooF = S = 1.019, Restrained GooF = 1.019 for all data
REM R1 = 0.0353 for 3262 Fo > 4sig(Fo) and 0.0622 for all 4436 data
REM 113 parameters refined using 5 restraints

END

WGHT      0.0229      0.0000

REM Instructions for potential hydrogen bonds
HTAB O2 O8_$15
HTAB O1 O7_$2
HTAB O4 O5_$16
HTAB O6 O1
HTAB O8 O3_$17

REM Highest difference peak  1.212,  deepest hole -1.445,  1-sigma level  0.260
Q1    1   0.4974  0.5537  0.7434  11.00000  0.05    1.21
Q2    1   0.5242  0.8013  0.6924  11.00000  0.05    1.10
Q3    1   0.9726  0.2646  0.8311  11.00000  0.05    1.08
Q4    1   0.5695  0.2147  0.9248  11.00000  0.05    1.01
Q5    1   0.1238  0.0012  0.4606  11.00000  0.05    1.00
Q6    1   0.5582  0.6021  0.6193  11.00000  0.05    0.99
Q7    1   0.2716  0.8428  0.8088  11.00000  0.05    0.98
Q8    1   0.1629  0.8073  0.7402  11.00000  0.05    0.96
Q9    1   0.4706  0.6453  0.7966  11.00000  0.05    0.95
Q10   1   0.4309  0.7182  0.6879  11.00000  0.05    0.92
;
_shelx_res_checksum   59338

_shelx_hkl_file
;
  -1   0   0  154.88   10.30
   1   0   0  119.09   11.40
   1   0   0  101.99    9.30
   1   0   0  158.68   10.10
   1   0   0  106.99    9.10
   1   0   0  159.08   12.20
  -2   0   0 5812.32  343.97
   2   0   0 5979.70  344.27
   2   0   0 5610.54  346.27
   2   0   0 5778.62  345.87
   2   0   0 5915.61  344.17
   2   0   0 6095.39  344.07
  -3   0   0  312.67   22.40
   3   0   0  282.97   22.40
   3   0   0  261.37   22.10
   3   0   0  279.17   27.30
   3   0   0  281.37   22.30
   3   0   0  301.47   25.90
  -4   0   0  117.09   15.80
   4   0   0  126.09   16.70
   4   0   0  126.79   20.30
   4   0   0  161.28   23.60
   4   0   0  132.99   16.70
   4   0   0  118.19   16.00
  -5   0   0  249.08   25.00
   5   0   0  202.68   25.40
   5   0   0  239.48   26.70
   5   0   0  254.17   33.80
   5   0   0  246.38   25.30
   5   0   0  241.78   32.60
  -6   0   0  496.75   39.90
  -6   0   0  408.66   46.20
   6   0   0  433.06   39.80
   6   0   0  475.45   39.40
   6   0   0  422.46   47.00
   6   0   0  462.85   39.60
  -7   0   0  340.97   36.60
  -7   0   0  376.26   42.50
   7   0   0  324.17   35.30
   7   0   0  347.97   38.40
   7   0   0  369.36   46.60
   7   0   0  403.56   41.40
  -8   0   0  471.85   51.99
   8   0   0  395.16   46.20
   8   0   0  515.55   52.39
   8   0   0  370.16   54.49
  -9   0   0   96.49   33.70
   9   0   0   18.80   32.20
   9   0   0   38.60   27.30
  10   0   0  114.79   38.10
  10   0   0   82.49   37.50
  10  -1   0   44.00   41.00
  10  -1   0   46.90   32.30
 -10   1   0   22.30   34.10
   9  -1   0  556.04   66.79
   9  -1   0  484.95   54.89
  -9   1   0  651.83   64.69
   8  -1   0    5.90   27.90
   8  -1   0   42.20   25.00
   8  -1   0    0.70   20.60
  -8   1   0    7.80   24.70
   7  -1   0 1142.29   83.29
   7  -1   0 1219.28   93.19
   7  -1   0 1131.69   83.39
  -7   1   0 1159.68   83.09
  -7   1   0 1201.68   87.69
   6  -1   0  741.43   60.49
   6  -1   0  630.04   47.70
   6  -1   0  639.34   50.89
   6  -1   0  740.33   52.99
  -6   1   0  637.04   51.39
  -6   1   0  619.84   54.19
   5  -1   0  321.37   26.90
   5  -1   0  294.37   36.50
   5  -1   0  301.87   29.00
   5  -1   0  335.87   31.60
  -5   1   0  302.27   30.20
  -5   1   0  291.57   35.30
   4  -1   0 3384.36  221.78
   4  -1   0 3737.33  216.58
   4  -1   0 3539.35  217.98
   4  -1   0 3662.83  217.88
  -4   1   0 3778.92  218.28
  -4   1   0 3654.53  221.28
   3  -1   0  583.14   47.70
   3  -1   0  740.43   42.80
   3  -1   0  612.44   43.40
   3  -1   0  660.93   44.10
  -3   1   0  691.43   44.70
  -3   1   0  642.54   47.30
   2  -1   0 2022.20  116.39
   2  -1   0 1958.40  117.49
   2  -1   0 2014.90  117.89
   2  -1   0 1945.01  120.09
   2  -1   0 1900.51  117.69
  -2   1   0 1962.00  117.99
  -2   1   0 1986.50  116.09
  -2   1   0 1936.41  119.59
   1  -1   0 1670.53   91.29
   1  -1   0 1457.55   89.99
   1  -1   0 1561.24   90.39
   1  -1   0 1502.95   90.09
   1  -1   0 1500.75   90.39
   1  -1   0 1450.05   89.99
  -1   1   0 1473.55   89.49
  -1   1   0 1474.25   90.39
  -1   1   0 1590.44   89.69
   1   1   0 1072.09   65.99
   1   1   0 1115.59   67.59
   1   1   0 1092.29   67.49
   1   1   0 1182.48   68.09
   2   1   0  730.63   46.30
   2   1   0  748.43   48.60
   2   1   0  761.52   48.40
   2   1   0  760.82   46.60
   2   1   0  733.13   49.80
  -3  -1   0   -0.40    5.30
   3   1   0   -2.60    5.80
   3   1   0   -8.00   11.40
   3   1   0   12.10    9.70
   3   1   0   -0.10    5.30
   3   1   0   -1.90    6.60
  -4  -1   0 4928.21  280.07
   4   1   0 4830.32  286.67
   4   1   0 4840.52  282.47
   4   1   0 4547.94  280.07
   4   1   0 4556.74  283.37
   4   1   0 4579.64  280.27
  -5  -1   0   45.20   12.40
   5   1   0   26.70   20.20
   5   1   0   60.09   15.30
   5   1   0   36.60   13.40
   5   1   0   52.29   19.60
   5   1   0   56.39   15.30
  -6  -1   0 1318.77   85.79
  -6  -1   0 1191.28   83.29
   6   1   0 1326.87   88.49
   6   1   0 1270.87   93.69
   6   1   0 1230.08   86.29
   6   1   0 1359.86   86.99
   6   1   0 1364.96   93.89
  -7  -1   0   47.50   14.80
  -7  -1   0   36.60   16.70
  -7  -1   0   67.59   22.00
   7   1   0   69.59   22.00
   7   1   0   47.90   26.70
   7   1   0   73.89   22.40
   7   1   0   40.90   28.90
   7   1   0   58.89   20.40
  -8  -1   0   28.20   22.90
   8   1   0   10.50   31.10
   8   1   0  -11.00   16.00
   8   1   0   -1.00   21.80
   9   1   0   58.89   27.90
   9   1   0   72.89   34.20
  10   1   0  149.69   52.49
  10  -2   0   17.40   38.70
 -10   2   0   32.90   36.10
   9  -2   0   66.09   30.20
   9  -2   0   97.49   39.80
  -9   2   0   76.09   34.20
   8  -2   0   30.60   22.70
   8  -2   0   38.30   25.90
   8  -2   0   19.30   30.90
  -8   2   0   21.60   26.60
   7  -2   0   99.49   25.30
   7  -2   0  117.69   32.90
   7  -2   0  113.39   24.60
  -7   2   0  102.09   27.30
   6  -2   0   69.19   19.30
   6  -2   0   36.40   25.30
   6  -2   0   84.69   19.00
  -6   2   0   58.49   20.90
  -6   2   0   73.29   21.80
  -6   2   0   53.59   17.80
   5  -2   0 1162.78   94.59
   5  -2   0 1429.66   85.19
   5  -2   0 1468.85   89.69
   5  -2   0 1355.66   89.59
  -5   2   0 1295.27   86.89
  -5   2   0 1397.96   91.29
  -5   2   0 1411.06   89.89
   4  -2   0   35.40   11.30
   4  -2   0    6.20   14.90
   4  -2   0   27.70   10.50
   4  -2   0   25.40    6.50
  -4   2   0   41.60   11.40
  -4   2   0   20.00    8.10
  -4   2   0   31.60    9.30
  -4   2   0   30.40   13.60
   3  -2   0 2840.82  176.08
   3  -2   0 2835.32  172.58
   3  -2   0 2890.21  169.28
   3  -2   0 2876.41  172.68
   3  -2   0 2774.22  171.98
  -3   2   0 3057.19  171.08
  -3   2   0 2854.81  173.78
  -3   2   0 2860.81  172.88
   2  -2   0 1038.00   66.49
   2  -2   0 1022.30   66.99
   2  -2   0 1080.29   67.09
   2  -2   0 1124.19   68.79
   2  -2   0 1038.50   66.19
  -2   2   0 1060.59   68.19
  -2   2   0 1122.99   67.49
  -2   2   0 1102.69   64.49
  -2   2   0 1121.49   65.29
   1  -2   0 2217.58  134.69
   1  -2   0 2334.07  135.59
   1  -2   0 2310.77  135.39
   1  -2   0 2249.97  135.59
   1  -2   0 2365.66  134.89
   1  -2   0 2128.99  134.19
   1  -2   0 2270.67  133.99
  -1   2   0 2260.87  136.49
  -1   2   0 2294.97  134.29
  -1   2   0 2321.77  134.29
  -1   2   0 2340.57  135.49
   0  -2   0 2558.64  158.38
   0  -2   0 2720.63  158.58
   0  -2   0 2726.33  158.18
   0  -2   0 2690.93  159.08
   0   2   0 2638.24  158.88
   0   2   0 2654.13  158.28
   0   2   0 2750.82  160.38
   0   2   0 2727.13  158.48
   0   2   0 2766.62  158.18
  -1  -2   0  397.96   26.20
  -1  -2   0  399.36   26.20
  -1  -2   0  395.06   27.20
  -1  -2   0  353.06   27.40
   1   2   0  455.65   29.00
   1   2   0  397.16   27.50
   1   2   0  398.46   24.20
   1   2   0  399.56   27.90
   1   2   0  382.46   27.50
  -2  -2   0  205.48   17.20
   2   2   0  222.78   16.60
   2   2   0  184.68   18.90
   2   2   0  230.78   15.80
   2   2   0  238.18   20.80
   2   2   0  215.08   21.20
  -3  -2   0 1654.03   96.49
  -3  -2   0 1654.43   97.59
   3   2   0 1519.65   96.39
   3   2   0 1609.24   96.99
   3   2   0 1631.94  100.39
   3   2   0 1583.34  100.09
   3   2   0 1469.35  101.69
  -4  -2   0   75.39   11.80
  -4  -2   0   87.19   13.10
   4   2   0  106.79   14.10
   4   2   0  101.19   19.60
   4   2   0  107.59   22.70
   4   2   0   88.29   13.60
   4   2   0   76.59   16.20
  -5  -2   0  428.36   34.10
  -5  -2   0  457.35   34.80
   5   2   0  404.66   40.90
   5   2   0  474.95   39.50
   5   2   0  398.06   35.70
   5   2   0  477.05   47.70
   5   2   0  437.86   35.40
  -6  -2   0  531.05   42.20
  -6  -2   0  541.45   43.10
   6   2   0  633.94   52.99
   6   2   0  556.74   44.60
   6   2   0  516.55   48.30
   6   2   0  531.45   44.90
   6   2   0  533.65   54.69
  -7  -2   0   31.10   14.00
  -7  -2   0   60.99   20.50
   7   2   0   -0.90   25.40
   7   2   0   43.70   21.00
   7   2   0   12.00   17.80
   7   2   0   33.70   27.50
   7   2   0   49.99   20.70
   8   2   0 1035.70   84.79
   8   2   0  985.00   76.69
   8   2   0  964.00   78.89
  -9  -2   0   75.79   33.40
   9   2   0   37.40   32.50
   9  -3   0  330.07   51.39
   9  -3   0  278.27   43.50
  -9   3   0  308.97   50.79
   8  -3   0   36.40   31.10
   8  -3   0    3.70   19.70
  -8   3   0   16.40   28.20
   7  -3   0  434.66   47.50
   7  -3   0  425.96   45.80
   7  -3   0  413.16   55.09
  -7   3   0  490.45   49.30
   6  -3   0  174.88   25.90
   6  -3   0  133.19   23.90
   6  -3   0  135.99   33.80
  -6   3   0  128.79   23.90
  -6   3   0  182.88   28.50
  -6   3   0   79.09   23.90
   5  -3   0   56.59   15.40
   5  -3   0   92.69   18.80
   5  -3   0   45.60   22.40
  -5   3   0  105.09   21.40
  -5   3   0   61.99   15.60
  -5   3   0   38.80   16.80
   4  -3   0 1115.49   85.79
   4  -3   0 1218.28   79.69
   4  -3   0 1177.88   80.29
  -4   3   0 1315.37   82.79
  -4   3   0 1273.97   76.79
  -4   3   0 1321.07   81.49
   3  -3   0  704.43   50.09
   3  -3   0  750.62   49.70
   3  -3   0  785.72   51.99
   3  -3   0  747.93   49.20
   3  -3   0  792.22   53.29
  -3   3   0  738.43   45.10
  -3   3   0  738.33   46.70
  -3   3   0  722.63   51.69
  -3   3   0  742.33   50.29
   2  -3   0  139.59   16.30
   2  -3   0  119.49   12.70
   2  -3   0  100.49   11.60
   2  -3   0  142.89   12.50
   2  -3   0   83.49   10.10
   2  -3   0   97.39   12.70
   2  -3   0  112.39   12.70
  -2   3   0   99.99   13.60
  -2   3   0  105.79    9.80
  -2   3   0  138.89   17.40
  -2   3   0   90.69    9.30
  -2   3   0  122.29   14.10
   1  -3   0 3130.79  178.78
   1  -3   0 2879.51  177.48
   1  -3   0 2996.50  178.98
   1  -3   0 2962.60  179.28
   1  -3   0 3089.19  177.68
   1  -3   0 3005.60  177.78
  -1   3   0 3036.90  177.68
  -1   3   0 2967.50  180.68
  -1   3   0 3157.88  178.18
  -1   3   0 3016.60  176.98
  -1   3   0 2962.60  178.88
  -1   3   0 2942.81  178.58
   0  -3   0  206.38   15.60
   0  -3   0  177.18   15.90
   0  -3   0  180.38   15.20
   0  -3   0  200.88   13.50
   0  -3   0  190.38   14.40
   0   3   0  185.38   15.50
   0   3   0  175.08   14.70
   0   3   0  187.68   19.20
   0   3   0  180.78   15.80
   0   3   0  188.28   14.50
  -1  -3   0 1857.01  113.69
  -1  -3   0 1908.71  111.29
  -1  -3   0 1800.02  112.59
  -1  -3   0 1960.20  113.29
   1   3   0 1856.41  110.69
   1   3   0 1818.82  114.29
   1   3   0 1987.60  115.79
   1   3   0 1894.61  112.69
   1   3   0 1809.02  114.89
  -2  -3   0 1214.28   89.39
  -2  -3   0 1480.45   88.09
  -2  -3   0 1492.15   89.69
   2   3   0 1510.95   90.49
   2   3   0 1395.46   90.69
   2   3   0 1547.35   92.39
   2   3   0 1427.46   85.69
  -3  -3   0 1578.94  104.19
  -3  -3   0 1824.82  107.19
   3   3   0 1645.54  107.79
   3   3   0 1642.44  102.69
   3   3   0 1731.43  110.19
   3   3   0 1818.62  108.29
  -4  -3   0 2124.39  132.79
  -4  -3   0 2310.97  135.89
  -4  -3   0 2256.47  130.99
   4   3   0 2079.39  131.29
   4   3   0 2025.20  136.39
   4   3   0 2043.80  139.89
   4   3   0 2151.18  137.29
   4   3   0 2277.87  132.49
  -5  -3   0   56.79   12.60
  -5  -3   0   52.29   13.70
   5   3   0   69.19   20.80
   5   3   0   75.59   21.00
   5   3   0   48.90   13.30
   5   3   0   41.00   24.60
   5   3   0   59.89   15.10
  -6  -3   0  531.95   46.90
   6   3   0  730.03   58.19
   6   3   0  595.24   60.49
   6   3   0  633.44   55.39
   6   3   0  624.94   48.60
   6   3   0  638.84   49.50
  -7  -3   0  366.56   43.00
   7   3   0  279.77   44.20
   7   3   0  329.87   42.00
   7   3   0  403.26   48.80
  -8  -3   0   10.80   25.60
   8   3   0   20.40   23.50
   8   3   0  -19.60   30.10
   9   3   0  229.18   48.90
   9   3   0  222.78   42.50
   9  -4   0  -36.60   32.50
   9  -4   0   14.80   25.90
  -9   4   0   46.50   35.60
   8  -4   0 1158.58   87.19
   8  -4   0 1116.19   95.69
  -8   4   0 1106.49   92.59
   7  -4   0   37.10   31.00
   7  -4   0   15.10   20.30
   7  -4   0   70.89   22.10
  -7   4   0   31.00   25.30
   6  -4   0  233.48   41.90
   6  -4   0  310.57   34.90
   6  -4   0  265.77   33.90
  -6   4   0  274.97   36.50
  -6   4   0  256.57   31.80
  -6   4   0  294.07   38.60
   5  -4   0  938.41   77.49
   5  -4   0  992.40   68.79
   5  -4   0  988.40   67.79
  -5   4   0 1045.50   70.49
  -5   4   0  949.80   71.69
  -5   4   0  972.40   71.09
   4  -4   0   -5.80   11.70
   4  -4   0  -12.00   14.40
   4  -4   0    2.40   10.20
   4  -4   0   20.30   11.50
  -4   4   0    0.70   10.60
  -4   4   0   15.00   16.00
  -4   4   0   12.10   13.50
  -4   4   0   10.30    6.40
   3  -4   0 2231.18  137.19
   3  -4   0 2070.99  134.79
   3  -4   0 2280.97  133.59
   3  -4   0 2169.98  133.69
  -3   4   0 2198.88  129.69
  -3   4   0 2179.68  130.89
  -3   4   0 2224.78  136.69
  -3   4   0 2172.58  134.99
  -3   4   0 2192.68  136.09
   2  -4   0   24.90    7.90
   2  -4   0   27.80    7.10
   2  -4   0   14.70    8.40
   2  -4   0   28.30    6.10
   2  -4   0   29.40    9.50
   2  -4   0   22.20    6.60
   2  -4   0   40.50    8.30
  -2   4   0   18.10   12.80
  -2   4   0   24.30    8.80
  -2   4   0   24.10    5.80
  -2   4   0   16.40    8.60
  -2   4   0   34.50    6.80
   1  -4   0 2064.99  124.89
   1  -4   0 2149.48  123.89
   1  -4   0 2044.00  123.99
   1  -4   0 2079.59  123.29
   1  -4   0 1948.11  125.89
   1  -4   0 2149.78  125.69
  -1   4   0 2062.99  125.19
  -1   4   0 2165.48  124.09
  -1   4   0 2037.00  125.09
  -1   4   0 2053.09  123.49
  -1   4   0 2056.79  128.29
   0  -4   0  311.57   23.50
   0  -4   0  334.47   21.40
   0  -4   0  318.27   22.30
   0  -4   0  328.97   23.70
   0  -4   0  302.97   24.80
   0   4   0  348.27   27.90
   0   4   0  300.87   22.60
   0   4   0  311.47   22.90
   0   4   0  325.27   23.90
   0   4   0  318.77   24.30
   0   4   0  300.17   27.00
  -1  -4   0   13.00    8.30
  -1  -4   0   12.40    4.80
  -1  -4   0    9.10    6.10
  -1  -4   0    5.00    6.90
   1   4   0    3.70    9.90
   1   4   0    3.80    3.70
   1   4   0    7.00    5.60
   1   4   0   14.70    8.30
   1   4   0    9.80   10.20
  -2  -4   0   34.30    9.00
  -2  -4   0   38.70   11.30
  -2  -4   0   44.10   11.20
  -2  -4   0   45.90    7.90
   2   4   0   48.00   13.10
   2   4   0   40.80   15.00
  -3  -4   0 3568.54  209.08
  -3  -4   0 3360.26  204.98
  -3  -4   0 3180.38  208.78
  -3  -4   0 3443.16  206.38
   3   4   0 3284.77  212.08
   3   4   0 3485.85  210.08
   3   4   0 3695.63  203.48
   3   4   0 3421.76  210.58
  -4  -4   0  115.19   13.30
  -4  -4   0   79.99   20.30
  -4  -4   0  128.79   21.70
  -4  -4   0  115.79   17.10
   4   4   0  104.49   22.10
   4   4   0  123.19   23.00
   4   4   0   92.69   25.20
   4   4   0  110.59   14.20
  -5  -4   0 1725.13  112.29
  -5  -4   0 1729.23  117.39
  -5  -4   0 1775.12  117.29
   5   4   0 1733.53  124.09
   5   4   0 1918.21  120.49
   5   4   0 1681.13  118.79
   5   4   0 1811.42  110.69
  -6  -4   0   -0.40   20.80
  -6  -4   0   23.00   14.50
  -6  -4   0   -7.50   19.80
   6   4   0    7.80   24.90
   6   4   0   45.10   28.80
   6   4   0   25.90   21.90
  -7  -4   0  124.49   31.90
  -7  -4   0  161.38   34.40
   7   4   0  116.79   38.20
   7   4   0  203.08   37.30
   7   4   0  182.88   37.70
  -8  -4   0   99.99   33.70
   8   4   0  114.89   40.70
   8   4   0   61.29   30.00
   9   4   0    2.50   28.00
   9  -5   0  -19.50   34.50
   9  -5   0    9.90   25.00
  -9   5   0   11.80   32.40
   8  -5   0   -2.90   31.90
   8  -5   0  -18.90   23.40
  -8   5   0   27.00   30.70
   7  -5   0   17.60   21.00
   7  -5   0   50.39   21.80
   7  -5   0  -29.40   31.60
  -7   5   0    2.70   24.30
   6  -5   0  638.74   75.39
   6  -5   0  921.21   65.09
   6  -5   0  897.91   66.49
  -6   5   0  819.92   67.69
  -6   5   0  851.91   67.19
   5  -5   0  104.89   19.50
   5  -5   0   89.69   28.50
   5  -5   0  106.09   20.20
  -5   5   0   81.59   19.60
  -5   5   0   74.39   24.50
  -5   5   0  127.39   26.00
   4  -5   0 2598.04  162.08
   4  -5   0 2561.34  163.68
   4  -5   0 2687.93  161.68
   4  -5   0 2718.23  168.28
  -4   5   0 2636.14  165.48
  -4   5   0 2687.93  165.58
  -4   5   0 2563.44  162.98
   3  -5   0   81.39   13.60
   3  -5   0   56.09   14.60
   3  -5   0   61.59   12.70
   3  -5   0   56.09   12.20
   3  -5   0   66.89   18.00
  -3   5   0   68.59   15.90
  -3   5   0   75.99   15.50
  -3   5   0   81.19   20.50
  -3   5   0   71.99   10.00
   2  -5   0  556.54   38.40
   2  -5   0  597.44   38.90
   2  -5   0  557.34   41.60
   2  -5   0  576.14   41.00
   2  -5   0  531.55   37.10
   2  -5   0  548.95   38.30
  -2   5   0  588.24   35.10
  -2   5   0  596.84   45.10
  -2   5   0  591.64   37.90
  -2   5   0  563.84   41.50
  -2   5   0  565.34   41.40
   1  -5   0 1004.90   61.19
   1  -5   0  995.30   59.59
   1  -5   0  911.41   62.89
   1  -5   0  918.51   60.19
   1  -5   0  970.20   61.99
  -1   5   0  993.10   61.99
  -1   5   0  949.90   59.99
  -1   5   0  946.11   65.79
  -1   5   0  934.01   61.39
  -1   5   0  934.81   60.09
   0  -5   0  284.37   27.30
   0  -5   0  317.67   25.80
   0  -5   0  364.76   26.10
   0  -5   0  350.76   23.30
   0  -5   0  333.67   24.30
   0   5   0  379.16   26.40
   0   5   0  358.96   31.60
   0   5   0  332.37   26.80
   0   5   0  309.87   25.10
   0   5   0  323.47   30.80
   0   5   0  370.76   27.50
  -1  -5   0 2859.01  172.78
  -1  -5   0 2840.82  175.08
  -1  -5   0 2881.61  175.38
  -1  -5   0 2896.31  176.98
   1   5   0 3014.60  172.38
   1   5   0 3163.78  181.58
   1   5   0 2982.20  177.98
   1   5   0 2736.33  179.18
  -2  -5   0  225.18   18.40
  -2  -5   0  235.08   22.90
  -2  -5   0  259.07   23.80
  -2  -5   0  242.88   26.10
   2   5   0  249.68   25.90
   2   5   0  251.27   31.50
  -3  -5   0  991.00   67.69
  -3  -5   0  951.20   69.39
  -3  -5   0 1051.99   70.69
   3   5   0 1078.09   73.59
   3   5   0 1067.69   75.89
  -4  -5   0  559.14   47.10
  -4  -5   0  609.24   47.90
  -4  -5   0  544.05   42.80
   4   5   0  510.95   47.60
   4   5   0  506.05   52.79
  -5  -5   0   -5.50   11.50
  -5  -5   0    9.90   19.90
  -5  -5   0   20.80   19.60
   5   5   0    2.70   24.70
   5   5   0   10.60   18.70
  -6  -5   0  290.97   40.60
  -6  -5   0  296.87   42.80
   6   5   0  317.27   51.49
   6   5   0  310.07   42.40
  -7  -5   0  967.80   82.49
   7   5   0 1028.60   84.99
   7   5   0 1022.60   90.39
  -8  -5   0   41.40   29.80
   8   5   0    0.50   27.60
   9   5   0  612.74   69.39
   9  -6   0   12.70   28.60
  -9   6   0    7.70   35.40
   8  -6   0  476.95   50.39
   8  -6   0  442.06   62.39
  -8   6   0  400.46   56.39
   7  -6   0  130.89   39.50
   7  -6   0   98.99   28.00
  -7   6   0  113.49   35.00
   6  -6   0  514.45   47.70
   6  -6   0  508.05   62.59
  -6   6   0  532.95   52.99
  -6   6   0  554.44   58.29
   5  -6   0   70.79   19.40
   5  -6   0  100.69   30.80
   5  -6   0   57.79   21.10
   5  -6   0   54.89   17.60
  -5   6   0  104.29   23.20
  -5   6   0   83.09   25.50
  -5   6   0   93.69   24.00
   4  -6   0   10.90   20.90
   4  -6   0   31.40   16.70
   4  -6   0    6.70   11.70
   4  -6   0    2.40   11.90
  -4   6   0    8.70   18.80
  -4   6   0   -3.80   15.20
  -4   6   0   10.00   14.70
   3  -6   0   50.79   20.60
   3  -6   0   23.20   11.20
   3  -6   0   35.80   11.50
   3  -6   0   42.20   15.10
  -3   6   0   31.10   15.50
  -3   6   0   45.30    9.30
  -3   6   0   23.60   14.00
  -3   6   0   48.10   21.40
   2  -6   0 1830.92  108.09
   2  -6   0 1792.52  112.69
   2  -6   0 1859.11  111.89
   2  -6   0 1825.52  108.79
   2  -6   0 1803.32  108.39
  -2   6   0 1770.32  111.39
  -2   6   0 1732.03  110.79
  -2   6   0 1743.33  115.29
  -2   6   0 1515.45  108.89
   1  -6   0    1.30    7.40
   1  -6   0   21.80   12.20
   1  -6   0    4.30    7.70
   1  -6   0   21.70    7.20
   1  -6   0   12.70    9.70
  -1   6   0    6.70   10.60
  -1   6   0   19.20    8.10
  -1   6   0    9.50   15.50
  -1   6   0    8.60    9.90
   0  -6   0 5354.26  332.37
   0  -6   0 5703.13  328.77
   0  -6   0 5618.64  327.37
   0  -6   0 5563.24  330.37
   0  -6   0 5537.35  329.87
   0   6   0 5850.61  337.17
   0   6   0 5922.61  331.17
   0   6   0 5371.96  335.67
   0   6   0 5340.87  329.97
   0   6   0 5472.85  331.17
  -1  -6   0  150.48   13.80
  -1  -6   0  130.89   13.60
  -1  -6   0  161.58   18.80
  -1  -6   0  135.69   16.70
  -1  -6   0  132.09   20.00
   1   6   0  153.68   12.40
   1   6   0  119.89   18.80
   1   6   0  149.88   24.80
   1   6   0  171.88   28.60
  -2  -6   0 2153.58  135.89
  -2  -6   0 2025.10  132.79
  -2  -6   0 2178.78  133.09
   2   6   0 2201.08  141.09
   2   6   0 2216.38  137.59
  -3  -6   0  451.55   37.10
  -3  -6   0  432.76   38.10
  -3  -6   0  451.85   40.10
   3   6   0  455.65   41.80
   3   6   0  408.16   48.30
  -4  -6   0    1.50   12.20
  -4  -6   0    6.40   17.20
  -4  -6   0  -28.00   15.50
   4   6   0    0.80   17.90
   4   6   0   15.10   24.80
  -5  -6   0  403.86   62.79
  -5  -6   0  684.43   57.09
   5   6   0  603.74   58.39
   5   6   0  622.44   65.09
  -6  -6   0   93.79   29.60
   6   6   0  138.69   42.50
   6   6   0  114.49   33.40
  -7  -6   0  279.57   42.10
   7   6   0  235.68   43.60
  -8  -6   0   28.00   32.50
   8   6   0   34.30   30.50
   8  -7   0   15.40   36.70
   8  -7   0    6.50   25.10
  -8   7   0  -26.80   30.00
   7  -7   0  274.67   54.59
   7  -7   0  407.76   43.60
  -7   7   0  330.57   48.90
   6  -7   0  696.33   57.99
   6  -7   0  654.03   74.99
  -6   7   0  726.23   66.49
   5  -7   0  188.58   27.80
   5  -7   0  175.38   40.00
   5  -7   0  269.57   36.60
  -5   7   0  234.58   36.90
  -5   7   0  243.28   38.20
   4  -7   0 1645.54  103.99
   4  -7   0 1728.13  113.59
   4  -7   0 1526.55  108.89
  -4   7   0 1576.54  107.19
  -4   7   0 1610.94  109.19
  -4   7   0 1617.04  111.59
   3  -7   0   12.90   20.60
   3  -7   0  -14.30    8.70
   3  -7   0   11.70   11.10
   3  -7   0   11.20   14.70
  -3   7   0    8.20   15.20
  -3   7   0  -18.90   19.30
  -3   7   0   -4.90   12.10
   2  -7   0  873.01   58.89
   2  -7   0  908.31   59.49
   2  -7   0  852.61   64.69
   2  -7   0  903.51   63.09
   2  -7   0  975.30   60.69
  -2   7   0  964.10   64.19
  -2   7   0  910.91   63.69
  -2   7   0  814.32   67.59
   1  -7   0  271.47   30.80
   1  -7   0  230.48   20.30
   1  -7   0  283.57   24.70
   1  -7   0  246.28   26.10
   1  -7   0  238.88   24.80
  -1   7   0  230.78   33.80
  -1   7   0  271.07   26.80
  -1   7   0  214.68   22.60
  -1   7   0  265.67   35.70
  -1   7   0  277.87   27.10
   0  -7   0  107.69   15.50
   0  -7   0   96.19   15.90
   0  -7   0   64.19   17.80
   0   7   0   80.19   16.40
   0   7   0   93.69   24.90
   0   7   0   76.79   15.90
   0   7   0   58.69   21.80
   0   7   0   68.19   16.10
  -1  -7   0   -4.60   13.80
  -1  -7   0    1.40   10.10
  -1  -7   0    0.20    9.70
   1   7   0   16.10   18.00
   1   7   0    9.30   12.70
   1   7   0   23.80   19.80
  -2  -7   0  334.57   36.30
  -2  -7   0  371.96   32.80
  -2  -7   0  371.16   32.00
   2   7   0  322.67   43.10
   2   7   0  361.36   36.40
  -3  -7   0  164.38   23.40
  -3  -7   0  169.78   22.60
  -3  -7   0  125.69   25.90
   3   7   0  170.28   30.50
   3   7   0  116.49   31.80
  -4  -7   0  973.60   67.79
   4   7   0  723.83   72.89
   4   7   0  708.73   65.49
  -5  -7   0   31.00   24.20
   5   7   0   15.70   25.60
   5   7   0   17.00   30.60
  -6  -7   0  392.86   49.60
   6   7   0  399.86   53.09
   6   7   0  458.05   65.49
  -7  -7   0  159.28   37.70
   7   7   0  159.28   42.20
   8   7   0    8.90   33.60
   8  -8   0   25.20   25.50
   8  -8   0   -7.30   40.80
  -8   8   0   -3.30   35.50
   7  -8   0    8.50   21.00
   7  -8   0   60.19   37.70
  -7   8   0   28.80   30.40
   6  -8   0  -21.60   34.00
   6  -8   0   83.79   24.40
  -6   8   0   98.89   31.20
   5  -8   0  621.54   52.09
   5  -8   0  712.43   72.39
   5  -8   0  623.94   59.19
  -5   8   0  662.73   60.99
  -5   8   0  640.14   62.29
   4  -8   0  -12.50   24.90
   4  -8   0   26.50   21.40
   4  -8   0   12.70   14.00
  -4   8   0  -19.10   15.80
  -4   8   0   13.30   24.00
  -4   8   0   68.39   23.10
   3  -8   0  944.51   74.19
   3  -8   0  884.71   70.09
   3  -8   0  920.51   64.29
   3  -8   0  896.31   61.99
  -3   8   0  902.71   68.09
  -3   8   0  940.81   68.69
  -3   8   0  935.81   75.09
   2  -8   0  625.34   43.10
   2  -8   0  570.04   52.09
   2  -8   0  543.35   47.50
   2  -8   0  593.04   45.40
  -2   8   0  671.33   56.49
  -2   8   0  546.75   49.00
  -2   8   0  683.43   50.89
   1  -8   0  198.38   24.40
   1  -8   0  202.38   25.00
   1  -8   0  181.28   21.90
   1  -8   0  208.08   29.60
  -1   8   0  174.08   25.40
  -1   8   0  162.18   32.30
  -1   8   0  203.98   34.90
  -1   8   0  109.79   22.50
   0  -8   0  856.41   65.09
   0  -8   0  897.51   60.89
   0  -8   0  882.91   60.89
   0   8   0  932.11   70.99
   0   8   0  860.61   62.39
   0   8   0  760.72   62.29
   0   8   0  998.10   74.19
  -1  -8   0    4.70   11.50
  -1  -8   0   -7.60   16.40
  -1  -8   0    6.20   11.90
   1   8   0    2.10   19.70
   1   8   0    1.90   14.10
   1   8   0  -18.90   18.50
  -2  -8   0  212.18   30.50
  -2  -8   0  216.48   26.50
  -2  -8   0  228.28   25.50
   2   8   0  198.08   32.30
   2   8   0  200.28   39.20
  -3  -8   0  199.58   31.10
   3   8   0  202.88   34.40
   3   8   0  209.68   40.90
  -4  -8   0   42.60   24.70
   4   8   0   -2.80   22.50
   4   8   0    4.60   29.60
  -5  -8   0   15.50   26.80
   5   8   0   46.80   32.70
   5   8   0   40.10   30.50
  -6  -8   0  104.79   33.50
   6   8   0  139.19   38.60
   6   8   0  163.18   47.00
  -7  -8   0   28.60   31.50
   7   8   0   18.70   33.10
   8  -9   0   -0.90   27.40
   7  -9   0  350.46   63.99
   7  -9   0  609.44   57.29
  -7   9   0  454.85   60.59
   6  -9   0    4.90   19.70
   6  -9   0   21.60   37.90
  -6   9   0  -20.90   28.50
   5  -9   0  155.48   43.10
   5  -9   0  176.88   35.80
   5  -9   0  160.58   26.20
  -5   9   0  147.09   37.40
  -5   9   0  206.98   40.50
   4  -9   0   54.09   32.40
   4  -9   0   13.30   22.80
  -4   9   0   43.40   25.30
  -4   9   0   32.40   26.70
   3  -9   0  190.58   37.50
   3  -9   0  206.58   32.80
  -3   9   0  180.48   31.80
  -3   9   0   89.79   25.60
  -3   9   0  179.78   38.60
   2  -9   0  -11.50   13.20
   2  -9   0    6.40   21.30
   2  -9   0   -6.10   13.60
  -2   9   0  -36.70   16.30
  -2   9   0    4.30   24.60
  -2   9   0   29.80   30.20
  -2   9   0  -13.40   19.30
   1  -9   0 1219.58   81.99
   1  -9   0 1180.88   81.29
   1  -9   0 1165.88   86.89
   1  -9   0 1229.48   80.49
  -1   9   0 1151.78   93.69
  -1   9   0 1154.78   91.19
   0  -9   0   43.00   20.70
   0  -9   0   63.19   16.40
   0  -9   0   28.70   14.50
   0   9   0   48.90   27.30
   0   9   0   61.69   18.20
   0   9   0  106.59   32.10
  -1  -9   0  828.22   76.09
  -1  -9   0  897.71   64.69
  -1  -9   0  916.91   71.59
   1   9   0  904.91   78.39
   1   9   0  868.41   79.89
   1   9   0  904.51   68.99
  -2  -9   0  197.58   32.80
   2   9   0  199.68   41.10
   2   9   0  231.78   35.80
  -3  -9   0  203.78   36.30
   3   9   0  144.89   40.90
   3   9   0  149.29   33.30
  -4  -9   0  979.90   81.99
   4   9   0 1021.80   86.19
  -5  -9   0   -7.50   26.20
   5   9   0   75.79   37.50
   5   9   0   -2.80   31.70
  -6  -9   0  353.76   51.99
   6   9   0  462.85   63.09
   7 -10   0   38.10   46.00
  -7  10   0   32.50   39.30
   6 -10   0  112.29   45.10
  -6  10   0   31.60   35.70
   5 -10   0  445.66   56.69
   5 -10   0  456.05   65.09
  -5  10   0  481.25   58.29
  -5  10   0  652.83   66.59
   4 -10   0   -8.40   25.70
   4 -10   0    7.40   33.20
  -4  10   0  -32.20   25.40
  -4  10   0   -6.20   28.80
   3 -10   0 1206.28   97.89
   3 -10   0 1360.56  104.39
  -3  10   0 1251.67  108.49
  -3  10   0 1365.26  104.49
   2 -10   0    0.20   21.80
  -2  10   0  -16.90   29.10
  -2  10   0   16.40   31.80
   1 -10   0  721.93   56.69
   1 -10   0  571.54   60.79
  -1  10   0  731.23   72.49
  -1  10   0  845.52   78.19
   0 -10   0   17.50   25.10
   0 -10   0   54.79   20.20
   0  10   0    0.20   31.60
   0  10   0   20.60   34.10
  -1 -10   0  -23.50   22.70
   1  10   0   -0.40   28.90
   1  10   0    9.90   19.50
  -2 -10   0   18.90   27.30
   2  10   0   39.50   25.60
   2  10   0    1.80   27.60
  -3 -10   0  737.83   67.79
   3  10   0  499.65   72.79
   3  10   0  755.22   67.59
  -4 -10   0   -0.90   27.90
   4  10   0   28.90   37.60
   4  10   0   71.19   34.20
  -5 -10   0  473.95   56.59
   5  10   0  691.13   75.49
   5  10   0  443.66   64.19
  -6 -10   0   -7.50   31.60
   6  10   0   30.20   48.70
   6 -11   0  146.09   49.40
  -6  11   0  170.08   46.10
   5 -11   0  199.48   52.49
   5 -11   0  238.78   47.30
  -5  11   0  177.08   44.70
  -5  11   0  218.18   57.89
   4 -11   0  356.56   51.39
   4 -11   0  527.45   68.89
  -4  11   0  334.07   54.99
  -4  11   0  394.26   65.59
   3 -11   0  -18.60   34.60
   3 -11   0   -0.90   25.80
  -3  11   0   -3.00   35.30
  -3  11   0  -11.90   31.70
   2 -11   0   88.49   32.00
  -2  11   0  121.89   43.10
  -2  11   0  115.49   45.50
   1 -11   0  452.35   54.89
  -1  11   0  494.75   67.39
  -1  11   0  411.36   65.39
   0 -11   0  -24.00   24.40
   0  11   0   44.30   35.00
   0  11   0  -29.40   30.30
  -1 -11   0  816.52   71.89
  -1 -11   0  755.82   74.09
   1  11   0  881.61   84.29
  -2 -11   0   19.70   27.60
   2  11   0   10.70   25.10
   2  11   0   54.29   38.70
  -3 -11   0  454.15   56.69
   3  11   0  287.07   60.09
   3  11   0  373.06   50.49
  -4 -11   0   11.80   30.10
   4  11   0   12.90   31.80
   4  11   0   -1.80   34.50
  -5 -11   0  -59.79   31.80
   5  11   0   80.19   63.19
   5  11   0   31.90   40.80
   5 -12   0  -37.90   38.90
   5 -12   0   12.60   38.80
  -5  12   0   -4.90   47.80
   4 -12   0   56.29   47.50
   4 -12   0   65.99   37.70
  -4  12   0   72.59   50.29
  -4  12   0  109.89   40.80
   3 -12   0   77.19   45.20
   3 -12   0  190.88   39.20
  -3  12   0   89.99   41.20
  -3  12   0   85.19   47.50
   2 -12   0  128.49   38.10
  -2  12   0  130.29   49.40
  -2  12   0  117.99   46.20
   1 -12   0   78.09   34.70
  -1  12   0   42.80   41.10
  -1  12   0   67.29   43.80
   0 -12   0  765.52   77.59
   0  12   0  781.32   92.29
  -1 -12   0   74.19   36.90
   1  12   0  133.49   43.70
  -2 -12   0  388.66   56.29
  -2 -12   0  487.95   63.59
  -3 -12   0  336.97   55.29
  -3 -12   0  454.35   57.79
   3  12   0  397.36   55.99
   3  12   0  198.78   56.19
   3 -13   0   27.30   45.90
   3 -13   0  -33.00   34.00
  -3  13   0   78.99   45.40
  -3  13   0   -3.90   52.99
   2 -13   0  255.07   48.90
   2 -13   0  229.88   62.29
  -2  13   0  162.18   52.19
  -2  13   0  240.18   53.79
   1 -13   0   41.50   33.10
  -1  13   0   69.79   47.10
   0 -13   0   22.90   34.40
   0  13   0   81.49   38.70
  -1 -13   0   68.19   41.10
   1  13   0   32.00   36.90
   2  13  -1   71.59   47.10
  -2 -13   1   -9.30   32.80
  -2 -13   1   96.39   41.70
   1  13  -1  423.26   68.29
  -1 -13   1  308.77   49.30
   0  13  -1   62.69   38.40
   0 -13   1   -0.20   28.80
  -1  13  -1  307.77   62.39
   1 -13   1  346.07   49.90
  -2  13  -1   38.70   40.40
   2 -13   1  -20.80   46.00
   2 -13   1    0.50   30.80
  -3  13  -1   69.79   39.60
  -3  13  -1  -47.40   41.40
   3 -13   1   21.90   36.30
   3 -13   1   -9.80   44.50
   4  12  -1   41.00   34.70
   4  12  -1  -22.70   37.80
  -4 -12   1  -24.70   31.90
  -4 -12   1   67.59   41.40
   3  12  -1   40.20   29.90
   3  12  -1   44.80   40.50
  -3 -12   1  113.69   37.30
  -3 -12   1   25.40   30.70
   2  12  -1  301.67   62.59
  -2 -12   1  262.87   45.10
  -2 -12   1  353.06   51.79
   1  12  -1   49.50   38.90
  -1 -12   1    4.10   27.60
  -1 -12   1   32.50   28.10
   0  12  -1  599.74   76.59
   0 -12   1  529.45   62.19
  -1  12  -1   91.29   40.30
   1 -12   1  105.59   32.10
  -2  12  -1   42.20   37.50
  -2  12  -1   84.79   40.20
   2 -12   1   51.89   42.70
   2 -12   1   35.40   27.90
  -3  12  -1  604.54   78.99
  -3  12  -1  614.74   74.59
   3 -12   1  761.82   79.69
   3 -12   1  503.85   63.69
  -4  12  -1   20.40   33.60
  -4  12  -1  -41.60   36.70
   4 -12   1  -63.19   41.10
   4 -12   1   15.90   28.10
  -5  12  -1  366.06   68.19
   5 -12   1  429.66   68.69
   5 -12   1  606.04   69.29
   5  11  -1   40.70   39.00
   5  11  -1   13.10   33.70
  -5 -11   1   -6.80   30.10
  -5 -11   1   54.59   33.60
   4  11  -1  721.73   74.19
  -4 -11   1  552.04   62.49
  -4 -11   1  564.24   71.09
   3  11  -1  -12.40   34.20
   3  11  -1   30.80   28.50
  -3 -11   1   25.70   26.30
  -3 -11   1   30.40   30.30
   2  11  -1  167.98   45.90
   2  11  -1  245.88   40.40
  -2 -11   1  360.36   51.19
  -2 -11   1  207.48   40.00
   1  11  -1  319.37   55.79
  -1 -11   1  320.87   44.90
  -1 -11   1  380.26   49.00
   0  11  -1  -20.50   28.30
   0 -11   1   -7.60   25.60
   0 -11   1    6.20   18.80
  -1  11  -1  498.55   64.29
  -1  11  -1  479.85   66.29
   1 -11   1  546.55   59.39
  -2  11  -1  274.27   48.30
  -2  11  -1  228.38   48.60
   2 -11   1  151.88   34.80
  -3  11  -1   43.60   38.20
  -3  11  -1   29.70   30.10
   3 -11   1  -11.60   25.20
   3 -11   1   17.40   39.70
  -4  11  -1  728.53   72.29
  -4  11  -1  566.94   77.49
   4 -11   1  839.42   87.69
   4 -11   1  659.13   71.79
  -5  11  -1   63.59   39.60
  -5  11  -1  104.89   46.40
   5 -11   1   96.29   34.80
   5 -11   1  141.89   47.30
  -6  11  -1   53.89   40.40
  -6  11  -1   39.20   45.00
   6 -11   1  125.99   51.59
   6  10  -1   72.79   49.80
   6  10  -1   62.09   41.00
   5  10  -1  138.39   38.60
   5  10  -1   63.39   41.10
  -5 -10   1   50.89   29.70
   4  10  -1   32.60   30.90
   4  10  -1   -1.90   35.00
  -4 -10   1    1.90   24.60
   3  10  -1   42.30   33.60
   3  10  -1   30.40   28.30
  -3 -10   1   19.00   24.60
   2  10  -1  662.63   62.39
   2  10  -1  714.83   73.09
  -2 -10   1  680.93   63.09
   1  10  -1    5.80   18.40
   1  10  -1   25.10   26.40
  -1 -10   1  -14.90   22.00
  -1 -10   1   -3.60   20.30
   0  10  -1 1285.57  105.69
   0  10  -1 1417.86  107.29
   0 -10   1 1399.06   97.09
   0 -10   1 1353.46   99.29
  -1  10  -1  -11.80   25.30
  -1  10  -1   42.60   33.80
   1 -10   1  -17.70   19.60
  -2  10  -1  367.36   54.49
  -2  10  -1  434.46   53.49
   2 -10   1  366.86   45.60
  -3  10  -1   51.99   28.90
  -3  10  -1   73.19   36.10
  -3  10  -1   12.40   26.70
   3 -10   1   45.60   26.70
   3 -10   1   65.39   37.40
  -4  10  -1   63.89   32.50
  -4  10  -1   53.09   35.00
  -4  10  -1   19.60   28.60
   4 -10   1   32.20   26.10
   4 -10   1   63.69   35.00
  -5  10  -1  103.69   36.80
   5 -10   1  134.49   37.20
   5 -10   1   94.89   40.90
  -6  10  -1  231.38   48.50
   6 -10   1  283.77   60.49
  -7  10  -1  -31.00   35.80
   7 -10   1   23.40   48.90
   7   9  -1  267.67   58.29
   6   9  -1   65.99   33.60
   6   9  -1   76.09   47.40
  -6  -9   1   66.09   30.90
   5   9  -1  -18.30   31.90
   5   9  -1   25.90   30.70
  -5  -9   1  -11.70   25.00
   4   9  -1  129.99   41.60
   4   9  -1  161.58   36.50
  -4  -9   1  173.68   33.10
   3   9  -1  102.59   35.30
   3   9  -1  143.79   30.70
  -3  -9   1  136.59   28.80
   2   9  -1  280.17   36.80
   2   9  -1  295.67   47.30
  -2  -9   1  298.17   37.30
   1   9  -1  519.85   47.40
   1   9  -1  512.05   59.79
  -1  -9   1  534.25   44.10
  -1  -9   1  505.65   48.90
   0   9  -1   -2.90   13.20
   0   9  -1   -5.90   21.80
   0   9  -1   -7.90   22.30
   0  -9   1   -9.30   11.90
   0  -9   1    2.80   18.40
   0  -9   1   11.80   15.60
   0  -9   1  -10.20   17.90
  -1   9  -1  502.55   54.39
  -1   9  -1  429.16   43.40
  -1   9  -1  402.06   52.59
   1  -9   1  429.66   39.20
   1  -9   1  376.16   43.80
   1  -9   1  432.66   38.10
   1  -9   1  454.65   38.30
  -2   9  -1 1031.90   78.09
  -2   9  -1 1167.98   79.99
  -2   9  -1 1013.70   84.29
  -2   9  -1  949.21   81.19
   2  -9   1 1074.79   73.29
   2  -9   1 1065.69   78.29
  -3   9  -1  196.18   34.10
  -3   9  -1  225.98   37.80
  -3   9  -1   95.79   25.10
   3  -9   1  107.89   32.50
   3  -9   1  239.68   39.90
   3  -9   1  128.69   27.80
  -4   9  -1 1373.26  102.89
   4  -9   1 1330.97  100.09
   4  -9   1 1496.15  109.59
  -5   9  -1   22.20   26.80
  -5   9  -1   30.20   29.20
   5  -9   1   11.90   25.10
   5  -9   1   30.10   35.90
  -6   9  -1  353.86   49.80
   6  -9   1  349.67   62.29
   6  -9   1  241.08   37.50
  -7   9  -1   49.99   36.80
   7  -9   1   79.49   44.90
   7  -9   1   -9.80   23.00
   8  -9   1   -6.90   45.50
   8  -9   1   -8.60   35.60
   7   8  -1   75.09   47.40
   7   8  -1   76.89   38.70
   6   8  -1   25.50   37.90
   6   8  -1   43.30   32.80
  -6  -8   1   10.90   25.10
   5   8  -1 1324.57  101.29
   5   8  -1 1148.89  106.49
  -5  -8   1 1280.97   92.99
   4   8  -1    9.20   29.30
   4   8  -1   -6.90   22.10
  -4  -8   1    0.60   19.80
   3   8  -1 1729.63  124.59
   3   8  -1 1679.33  116.69
  -3  -8   1 1687.73  113.39
   2   8  -1  332.47   38.70
   2   8  -1  313.97   43.40
  -2  -8   1  297.47   36.10
  -2  -8   1  305.77   32.30
   1   8  -1  145.49   31.70
   1   8  -1  186.98   33.00
   1   8  -1  193.58   26.00
  -1  -8   1  186.58   26.80
  -1  -8   1  150.28   20.60
  -1  -8   1  170.68   20.00
   0   8  -1  249.18   37.10
   0   8  -1  157.28   25.80
   0   8  -1  173.78   25.70
   0   8  -1  148.69   30.40
   0   8  -1  192.28   24.70
   0  -8   1  215.58   22.90
   0  -8   1  208.88   23.40
   0  -8   1  209.88   27.60
   0  -8   1  239.88   30.90
  -1   8  -1  132.29   22.80
  -1   8  -1  135.89   24.20
  -1   8  -1   95.49   28.50
  -1   8  -1   71.69   24.40
   1  -8   1  136.09   22.00
   1  -8   1   94.59   16.40
   1  -8   1  118.19   18.70
   1  -8   1   97.59   21.60
  -2   8  -1  158.78   24.30
  -2   8  -1  179.68   27.60
  -2   8  -1  129.59   29.10
   2  -8   1  136.69   24.60
   2  -8   1  170.18   21.90
  -3   8  -1  410.86   40.50
  -3   8  -1  334.97   40.50
  -3   8  -1  396.76   45.20
   3  -8   1  305.17   38.40
   3  -8   1  429.36   37.10
   3  -8   1  376.16   31.40
   3  -8   1  395.26   46.00
  -4   8  -1  141.09   28.40
  -4   8  -1  103.09   25.80
  -4   8  -1  127.29   30.60
   4  -8   1  139.89   20.90
   4  -8   1   72.29   29.80
   4  -8   1  177.78   30.50
  -5   8  -1  122.49   29.60
  -5   8  -1  125.29   30.90
   5  -8   1   94.99   20.90
   5  -8   1   91.19   28.50
   5  -8   1  115.79   38.10
  -6   8  -1  183.18   41.80
   6  -8   1  188.58   30.80
   6  -8   1  186.08   46.40
  -7   8  -1  -19.20   31.90
   7  -8   1   30.70   38.30
   7  -8   1    7.80   22.30
  -8   8  -1  491.55   63.39
   8  -8   1  506.65   54.39
   8  -8   1  290.27   65.99
   8   7  -1   -8.60   30.80
   7   7  -1  347.67   54.29
   7   7  -1  442.76   65.59
  -7  -7   1  381.16   47.90
   6   7  -1   26.60   27.00
   6   7  -1   14.00   40.20
  -6  -7   1   33.60   24.50
   5   7  -1   40.70   25.90
   5   7  -1   25.00   32.30
  -5  -7   1   60.69   24.00
   4   7  -1  303.77   39.50
   4   7  -1  203.48   41.50
  -4  -7   1  291.47   34.40
  -4  -7   1  270.77   42.20
   3   7  -1  212.98   31.80
   3   7  -1  138.19   32.50
  -3  -7   1  182.08   24.10
  -3  -7   1  198.08   27.70
   2   7  -1   20.00   20.70
   2   7  -1   17.40   14.50
  -2  -7   1   -2.30   11.00
  -2  -7   1   24.10   10.20
  -2  -7   1  -10.10   14.40
   1   7  -1 1892.11  107.39
   1   7  -1 1662.93  115.59
   1   7  -1 1719.83  117.59
   1   7  -1 1676.63  111.79
  -1  -7   1 1760.22  107.49
  -1  -7   1 1640.14  109.19
  -1  -7   1 1748.82  111.99
   0   7  -1  254.27   35.80
   0   7  -1  246.08   33.50
   0   7  -1  206.58   25.60
   0   7  -1  231.48   27.70
   0   7  -1  253.67   26.00
   0  -7   1  210.48   22.20
   0  -7   1  203.38   26.70
   0  -7   1  194.48   22.50
  -1   7  -1 1761.62  122.39
  -1   7  -1 1911.71  119.09
  -1   7  -1 1836.32  124.29
  -1   7  -1 1937.11  115.59
  -1   7  -1 2046.60  119.69
   1  -7   1 1824.42  112.69
   1  -7   1 1962.70  116.59
   1  -7   1 1853.11  116.79
   1  -7   1 1720.23  118.79
   1  -7   1 1850.01  117.89
  -2   7  -1   88.39   18.60
  -2   7  -1   80.09   21.70
  -2   7  -1  118.09   21.50
   2  -7   1   85.09   15.30
   2  -7   1   79.29   12.40
   2  -7   1   64.89   17.90
   2  -7   1   91.69   15.40
  -3   7  -1  153.68   25.60
  -3   7  -1  105.79   22.00
  -3   7  -1  143.09   27.10
   3  -7   1  129.59   23.10
   3  -7   1  102.69   18.60
   3  -7   1  113.39   26.30
   3  -7   1  151.08   18.20
  -4   7  -1  286.57   35.10
  -4   7  -1  356.36   40.20
  -4   7  -1  405.26   40.70
   4  -7   1  368.36   32.60
   4  -7   1  456.75   48.20
   4  -7   1  323.37   37.70
  -5   7  -1  119.59   29.40
  -5   7  -1  108.29   26.90
   5  -7   1  121.29   32.60
   5  -7   1  114.59   21.10
   5  -7   1   53.19   22.60
  -6   7  -1  110.09   32.70
   6  -7   1   25.40   35.30
   6  -7   1  111.39   25.30
  -7   7  -1  495.65   59.39
   7  -7   1  329.27   42.20
   7  -7   1  343.87   59.59
  -8   7  -1    2.60   33.90
   8  -7   1   46.70   25.70
   8  -7   1   40.30   40.10
   9  -7   1  142.39   58.19
   8   6  -1  620.54   71.99
   7   6  -1  121.99   36.90
   7   6  -1   94.19   44.70
  -7  -6   1   67.49   28.20
   6   6  -1  234.38   41.20
   6   6  -1  239.98   52.59
  -6  -6   1  265.17   37.80
   5   6  -1  512.75   67.39
   5   6  -1  675.43   58.89
  -5  -6   1  679.33   55.99
   4   6  -1   83.79   24.20
   4   6  -1  103.19   31.00
  -4  -6   1  113.49   18.90
  -4  -6   1  126.89   23.60
   3   6  -1  834.72   66.39
   3   6  -1  925.91   71.09
  -3  -6   1  925.31   63.99
  -3  -6   1  904.01   62.09
  -3  -6   1  885.91   59.79
   2   6  -1 1203.28   79.59
   2   6  -1 1202.98   82.69
  -2  -6   1 1087.09   76.39
  -2  -6   1 1129.09   72.19
  -2  -6   1 1168.48   75.59
  -2  -6   1 1144.79   72.89
   1   6  -1  -12.70   12.30
   1   6  -1   -0.10    9.50
   1   6  -1   15.40   16.40
   1   6  -1    8.70    8.30
  -1  -6   1   -3.30    7.00
  -1  -6   1   10.20    7.20
  -1  -6   1    5.40   11.80
  -1  -6   1   -0.20    8.00
   0   6  -1  896.31   61.29
   0   6  -1 1048.00   64.09
   0   6  -1  884.11   66.29
   0   6  -1  890.01   66.59
   0   6  -1  986.70   63.09
   0  -6   1  945.31   59.79
   0  -6   1  891.21   62.39
   0  -6   1  885.41   55.99
   0  -6   1  941.41   59.79
   0  -6   1  917.81   60.69
  -1   6  -1  828.22   52.39
  -1   6  -1  750.92   51.59
  -1   6  -1  729.63   48.50
  -1   6  -1  688.13   55.49
   1  -6   1  744.93   50.79
   1  -6   1  723.53   49.40
   1  -6   1  657.03   52.09
   1  -6   1  739.23   46.50
   1  -6   1  746.93   50.09
  -2   6  -1   -3.10   11.50
  -2   6  -1    2.50   10.90
  -2   6  -1    5.50   15.50
   2  -6   1    3.60    8.80
   2  -6   1    2.10   11.50
   2  -6   1    6.10    7.10
   2  -6   1    5.80    8.50
  -3   6  -1 2192.28  139.29
  -3   6  -1 2178.08  139.79
  -3   6  -1 2073.09  137.19
   3  -6   1 2404.26  136.89
   3  -6   1 2100.39  138.49
   3  -6   1 2211.58  141.09
   3  -6   1 2243.58  134.59
  -4   6  -1  158.38   23.60
  -4   6  -1  180.38   28.00
  -4   6  -1  133.29   26.40
   4  -6   1  179.68   32.20
   4  -6   1  151.98   21.00
   4  -6   1  172.78   26.70
  -5   6  -1 2209.88  147.49
  -5   6  -1 2307.27  151.28
  -5   6  -1 2300.67  147.99
   5  -6   1 2390.56  155.68
   5  -6   1 2353.36  145.39
  -6   6  -1   67.19   26.50
   6  -6   1   74.79   20.50
   6  -6   1   29.50   33.50
  -7   6  -1  444.46   55.69
   7  -6   1  352.06   43.30
   7  -6   1  360.66   57.09
  -8   6  -1  315.97   52.59
   8  -6   1  332.47   44.60
   8  -6   1  268.97   56.39
  -9   6  -1   28.40   37.10
   9  -6   1  -11.30   28.50
   9  -6   1   77.19   41.50
   9   5  -1   21.90   30.60
   8   5  -1   14.20   27.50
   8   5  -1  -17.60   47.20
   7   5  -1    7.30   34.10
   7   5  -1   12.00   24.80
  -7  -5   1   -2.60   21.30
   6   5  -1 1358.76  117.49
   6   5  -1 1644.74  110.59
  -6  -5   1 1491.25  104.09
   5   5  -1   -4.30   25.00
   5   5  -1  -19.40   15.20
  -5  -5   1  -27.20   16.10
  -5  -5   1   10.50   16.80
  -5  -5   1   -9.10   11.70
   4   5  -1 2483.05  143.79
   4   5  -1 2470.35  153.58
   4   5  -1 2412.46  158.28
  -4  -5   1 2186.48  148.39
  -4  -5   1 2314.67  149.09
  -4  -5   1 2424.76  147.79
   3   5  -1  224.38   17.20
   3   5  -1  229.08   28.60
   3   5  -1  315.87   37.70
  -3  -5   1  187.48   20.70
  -3  -5   1  228.48   25.50
  -3  -5   1  201.18   22.00
  -3  -5   1  229.28   23.40
   2   5  -1  697.33   51.29
   2   5  -1  682.03   42.00
   2   5  -1  667.03   53.49
  -2  -5   1  713.83   46.10
  -2  -5   1  724.43   49.30
  -2  -5   1  666.13   45.80
  -2  -5   1  738.93   48.30
   1   5  -1 2126.49  120.59
   1   5  -1 2100.89  125.79
   1   5  -1 1855.31  124.09
   1   5  -1 1953.50  122.39
  -1  -5   1 1996.00  119.19
  -1  -5   1 1915.61  118.79
  -1  -5   1 1962.50  116.29
  -1  -5   1 1992.40  121.59
  -1  -5   1 1873.51  120.39
   0   5  -1   10.70   11.70
   0   5  -1   -2.20    6.70
   0   5  -1   -0.80   10.50
   0   5  -1   10.40    6.00
   0   5  -1    4.60    9.00
   0   5  -1    9.20    9.60
   0  -5   1    4.40    3.40
   0  -5   1    0.90    5.70
   0  -5   1    4.50    5.80
   0  -5   1   10.20    8.70
   0  -5   1    9.00    7.10
  -1   5  -1 4217.18  235.98
  -1   5  -1 3954.10  240.48
  -1   5  -1 3944.21  237.78
  -1   5  -1 4027.80  236.48
  -1   5  -1 4036.20  238.18
   1  -5   1 3910.81  234.68
   1  -5   1 3807.62  236.98
   1  -5   1 4071.09  237.88
   1  -5   1 3974.70  237.18
   1  -5   1 4094.49  236.68
   1  -5   1 3801.12  238.38
  -2   5  -1  504.85   34.80
  -2   5  -1  499.75   40.40
  -2   5  -1  529.65   39.10
  -2   5  -1  522.65   38.00
   2  -5   1  479.65   35.90
   2  -5   1  474.65   38.00
   2  -5   1  540.95   35.60
   2  -5   1  506.05   34.40
  -3   5  -1  767.82   51.19
  -3   5  -1  748.13   56.69
  -3   5  -1  789.62   55.69
  -3   5  -1  809.52   57.69
   3  -5   1  846.62   58.99
   3  -5   1  774.22   52.59
   3  -5   1  772.82   55.79
   3  -5   1  756.52   54.69
   3  -5   1  843.22   51.39
  -4   5  -1  681.93   51.49
  -4   5  -1  626.24   51.69
  -4   5  -1  724.23   52.09
   4  -5   1  655.23   47.50
   4  -5   1  604.54   50.59
   4  -5   1  693.53   57.29
  -5   5  -1  184.78   27.20
  -5   5  -1  267.47   34.10
  -5   5  -1  253.17   30.80
   5  -5   1  239.38   27.30
   5  -5   1  246.38   38.30
  -6   5  -1   46.60   23.30
   6  -5   1   74.39   33.80
   6  -5   1   54.29   20.00
  -7   5  -1  739.73   70.79
   7  -5   1  733.93   81.79
   7  -5   1  818.32   65.09
  -8   5  -1   56.69   33.50
   8  -5   1   62.79   26.10
   8  -5   1   48.00   38.00
  -9   5  -1  459.35   63.59
   9  -5   1  346.87   48.10
   9   4  -1  -17.80   26.10
   8   4  -1  538.35   65.99
   8   4  -1  608.04   59.89
   8   4  -1  584.44   62.29
  -8  -4   1  293.17   59.29
   7   4  -1   14.20   25.00
   7   4  -1  -26.20   30.80
   7   4  -1    3.50   21.50
   7   4  -1  -16.70   15.80
  -7  -4   1  -13.50   20.50
   6   4  -1  538.75   53.59
   6   4  -1  554.84   44.40
   6   4  -1  558.34   52.09
   6   4  -1  529.85   64.69
  -6  -4   1  559.24   45.40
  -6  -4   1  529.45   50.49
  -6  -4   1  635.14   51.99
   5   4  -1   26.20   27.50
   5   4  -1   29.50   19.10
   5   4  -1   50.19   13.50
   5   4  -1   27.50   17.70
  -5  -4   1   46.20   13.50
  -5  -4   1   67.39   12.40
  -5  -4   1   28.50   16.40
  -5  -4   1   28.10   16.50
   4   4  -1  126.89   22.60
   4   4  -1  131.89   28.40
   4   4  -1  128.09   14.70
   4   4  -1  109.79   20.40
  -4  -4   1   98.99   19.60
  -4  -4   1  113.09   19.30
  -4  -4   1   91.49   15.00
   3   4  -1   12.40    6.00
   3   4  -1   13.50   11.10
   3   4  -1   16.70   16.40
  -3  -4   1   14.10    8.90
  -3  -4   1   11.00   11.00
  -3  -4   1    1.30    9.30
   2   4  -1 2639.14  167.48
   2   4  -1 2766.42  169.68
   2   4  -1 2741.13  161.68
  -2  -4   1 3003.00  165.08
  -2  -4   1 2625.04  164.58
  -2  -4   1 2762.62  165.48
  -2  -4   1 2666.33  163.88
   1   4  -1   71.09   12.20
   1   4  -1  116.89   17.40
   1   4  -1  121.79   12.60
   1   4  -1   79.59   15.20
   1   4  -1  128.99   13.90
   1   4  -1   97.99    7.60
  -1  -4   1   96.09   11.30
  -1  -4   1  108.19   13.50
  -1  -4   1  116.49   12.90
  -1  -4   1   98.99   10.50
   0   4  -1 6923.31  401.46
   0   4  -1 6502.25  400.26
   0   4  -1 7063.19  401.56
   0   4  -1 6919.61  403.86
   0   4  -1 6888.91  403.56
   0  -4   1 6927.31  399.86
   0  -4   1 6838.42  401.56
   0  -4   1 6983.40  397.96
   0  -4   1 6861.81  400.56
   0  -4   1 6306.77  400.06
  -1   4  -1   74.29   11.60
  -1   4  -1   54.99   11.00
  -1   4  -1   85.59    9.20
  -1   4  -1   94.19   15.40
  -1   4  -1   90.19   10.30
   1  -4   1   75.79   10.80
   1  -4   1   89.09   11.70
   1  -4   1   67.39   11.50
   1  -4   1   86.89    8.70
   1  -4   1   83.09   10.20
   1  -4   1   78.69   10.60
  -2   4  -1  792.72   52.69
  -2   4  -1  759.62   51.69
  -2   4  -1  788.22   48.80
  -2   4  -1  777.92   52.39
   2  -4   1  729.63   51.19
   2  -4   1  850.11   50.19
   2  -4   1  698.33   50.19
   2  -4   1  729.43   48.70
   2  -4   1  771.92   49.90
   2  -4   1  764.32   52.89
  -3   4  -1  263.77   25.40
  -3   4  -1  232.58   26.50
  -3   4  -1  251.37   24.40
  -3   4  -1  270.07   21.10
   3  -4   1  253.57   29.10
   3  -4   1  269.47   24.30
   3  -4   1  294.47   22.40
   3  -4   1  282.77   19.60
   3  -4   1  187.68   23.70
  -4   4  -1   14.40   14.10
  -4   4  -1   11.10    7.70
  -4   4  -1    1.70   13.60
  -4   4  -1    4.00   11.30
   4  -4   1   -3.50   16.30
   4  -4   1    6.00   11.90
   4  -4   1    4.70    9.70
  -5   4  -1  313.07   33.40
  -5   4  -1  344.97   38.90
  -5   4  -1  337.27   33.20
   5  -4   1  325.27   30.90
   5  -4   1  305.17   43.20
   5  -4   1  339.17   35.10
  -6   4  -1  204.88   29.30
  -6   4  -1  243.28   35.30
   6  -4   1  233.18   42.00
   6  -4   1  279.37   32.50
  -7   4  -1  188.28   36.70
   7  -4   1  205.08   32.70
   7  -4   1  142.59   40.30
  -8   4  -1  273.07   45.50
   8  -4   1  179.08   44.90
   8  -4   1  214.68   35.70
  -9   4  -1   42.00   35.20
   9  -4   1   -6.20   42.00
   9  -4   1   24.10   26.70
   9   3  -1  451.05   54.39
   9   3  -1  397.46   55.39
   8   3  -1   79.39   33.50
   8   3  -1   11.80   33.50
   8   3  -1   31.80   23.30
   8   3  -1   89.59   25.00
   8   3  -1   74.89   28.70
   7   3  -1  635.84   56.59
   7   3  -1  436.06   61.99
   7   3  -1  523.15   49.30
   7   3  -1  601.94   50.09
   7   3  -1  673.43   58.99
   6   3  -1  237.88   42.80
   6   3  -1  207.88   26.20
   6   3  -1  257.47   34.10
   6   3  -1  245.98   27.90
   6   3  -1  224.48   32.80
  -6  -3   1  223.18   24.40
  -6  -3   1  230.98   25.70
   5   3  -1   57.29   14.20
   5   3  -1   39.20   16.20
   5   3  -1   44.10   18.60
   5   3  -1   62.69   14.10
   5   3  -1   24.80   25.80
  -5  -3   1   63.79   12.90
  -5  -3   1   31.20   11.70
   4   3  -1 1883.71  111.89
   4   3  -1 1880.31  111.89
   4   3  -1 1704.43  115.09
   4   3  -1 1693.73  121.39
   4   3  -1 1856.51  117.39
  -4  -3   1 1864.31  112.69
   3   3  -1    2.80    5.80
   3   3  -1   -2.10   12.10
   3   3  -1    1.80    9.30
   3   3  -1    1.20    5.70
   3   3  -1   12.20    9.80
  -3  -3   1    5.00    6.40
  -3  -3   1    2.80    8.60
  -3  -3   1  -17.20    6.70
   2   3  -1 1370.46   80.09
   2   3  -1 1299.07   84.39
   2   3  -1 1372.56   86.19
   2   3  -1 1341.87   80.19
  -2  -3   1 1295.47   81.89
  -2  -3   1 1316.17   82.39
   1   3  -1  425.86   29.00
   1   3  -1  394.86   28.30
   1   3  -1  415.46   30.10
   1   3  -1  427.16   26.00
   1   3  -1  437.76   31.70
  -1  -3   1  466.35   29.90
  -1  -3   1  415.86   27.00
  -1  -3   1  378.76   28.30
  -1  -3   1  404.06   28.90
   0   3  -1  340.07   24.30
   0   3  -1  356.86   26.10
   0   3  -1  360.76   24.10
   0   3  -1  307.27   22.90
   0   3  -1  341.27   25.20
   0   3  -1  325.67   22.80
   0  -3   1  324.47   23.20
   0  -3   1  314.67   19.90
   0  -3   1  323.97   21.70
   0  -3   1  294.77   22.40
   0  -3   1  315.67   23.00
  -1   3  -1 3149.78  188.48
  -1   3  -1 3191.68  189.38
  -1   3  -1 3216.48  187.48
  -1   3  -1 3290.07  189.08
   1  -3   1 3258.37  188.08
   1  -3   1 3074.19  188.58
   1  -3   1 3176.18  187.58
   1  -3   1 3146.39  188.28
   1  -3   1 3068.29  186.68
  -2   3  -1 3099.49  180.78
  -2   3  -1 3072.49  182.38
  -2   3  -1 3046.20  183.28
  -2   3  -1 3023.80  182.38
   2  -3   1 2888.81  181.98
   2  -3   1 2993.60  180.78
   2  -3   1 2847.52  182.28
   2  -3   1 3121.49  181.88
   2  -3   1 3111.89  183.98
   2  -3   1 3306.37  182.28
  -3   3  -1  361.86   30.40
  -3   3  -1  371.26   28.90
  -3   3  -1  428.66   32.90
  -3   3  -1  426.26   32.40
   3  -3   1  397.36   29.50
   3  -3   1  414.56   35.20
   3  -3   1  365.16   31.30
   3  -3   1  427.06   31.00
   3  -3   1  444.46   27.50
  -4   3  -1 4657.23  286.77
  -4   3  -1 4661.03  285.37
  -4   3  -1 4721.23  288.57
  -4   3  -1 5056.09  284.57
   4  -3   1 5040.50  293.37
   4  -3   1 4622.14  286.47
   4  -3   1 4824.32  285.87
  -5   3  -1   89.89   21.50
  -5   3  -1   87.49   18.50
  -5   3  -1   90.29   19.10
   5  -3   1   80.89   17.00
   5  -3   1  112.89   29.50
   5  -3   1   67.69   18.10
  -6   3  -1  544.25   46.10
  -6   3  -1  533.35   50.19
   6  -3   1  483.95   57.29
   6  -3   1  526.95   45.60
   6  -3   1  527.55   45.80
  -7   3  -1  130.29   31.00
   7  -3   1   81.89   33.90
   7  -3   1  120.49   24.70
  -8   3  -1  -12.70   27.80
   8  -3   1    2.90   33.70
   8  -3   1   40.20   24.20
  -9   3  -1   98.29   37.90
   9  -3   1  111.99   42.30
   9  -3   1   62.49   30.70
   9   2  -1   63.69   28.30
   9   2  -1   42.00   30.50
   8   2  -1    3.20   19.40
   8   2  -1   28.20   33.50
   8   2  -1  -20.90   18.70
   8   2  -1   -4.10   20.20
   8   2  -1    4.70   25.90
  -8  -2   1    8.70   27.30
   7   2  -1  135.29   24.90
   7   2  -1  122.99   30.10
   7   2  -1  124.19   27.20
   7   2  -1  173.08   40.00
   7   2  -1  188.18   28.10
  -7  -2   1   89.59   18.20
   6   2  -1   54.09   28.70
   6   2  -1    5.10   17.00
   6   2  -1   48.90   16.50
   6   2  -1   55.39   18.70
   6   2  -1   27.10   14.60
  -6  -2   1   47.20   12.30
  -6  -2   1   45.20   14.40
   5   2  -1 1800.12  136.49
   5   2  -1 2042.90  126.59
   5   2  -1 2062.69  126.99
   5   2  -1 1967.90  129.99
   5   2  -1 2063.09  130.49
  -5  -2   1 2123.29  125.79
  -5  -2   1 2129.59  126.69
   4   2  -1   17.60    8.50
   4   2  -1   22.00   11.80
   4   2  -1   22.20    9.00
   4   2  -1   32.80   12.10
   4   2  -1    7.70   18.50
  -4  -2   1   12.40    7.90
  -4  -2   1    8.00    7.90
   3   2  -1 6462.85  371.16
   3   2  -1 6145.79  371.66
   3   2  -1 6151.78  368.86
   3   2  -1 6289.17  375.06
   3   2  -1 6288.87  368.66
  -3  -2   1 6301.87  368.96
   2   2  -1 2552.44  158.58
   2   2  -1 2821.42  160.88
   2   2  -1 2584.74  157.78
   2   2  -1 2632.04  156.18
   2   2  -1 2649.24  155.78
  -2  -2   1 2605.14  156.68
   1   2  -1 2951.40  175.38
   1   2  -1 3069.29  176.08
   1   2  -1 3152.38  177.08
   1   2  -1 3058.59  179.18
   1   2  -1 2783.22  177.88
   1   2  -1 3216.88  177.48
  -1  -2   1 3017.50  176.98
  -1  -2   1 2803.42  176.28
  -1  -2   1 2980.90  177.08
   0   2  -1 4683.53  292.97
   0   2  -1 5125.99  292.37
   0   2  -1 5036.00  293.37
   0   2  -1 5211.98  292.87
   0   2  -1 5184.58  292.87
   0   2  -1 4934.41  291.97
   0  -2   1 4876.31  292.07
   0  -2   1 4738.93  291.87
   0  -2   1 4817.72  290.57
   0  -2   1 4923.71  292.37
   0  -2   1 5162.78  291.27
   0  -2   1 5153.08  293.17
  -1   2  -1  263.37   19.80
  -1   2  -1  256.27   19.40
  -1   2  -1  238.58   19.40
  -1   2  -1  273.77   18.90
   1  -2   1  269.07   19.70
   1  -2   1  259.47   20.50
   1  -2   1  270.67   19.60
   1  -2   1  273.37   19.30
   1  -2   1  285.27   19.40
   1  -2   1  261.17   17.90
  -2   2  -1  609.54   39.70
  -2   2  -1  628.74   41.30
  -2   2  -1  563.64   40.20
  -2   2  -1  620.94   39.60
   2  -2   1  602.54   39.90
   2  -2   1  618.94   43.30
   2  -2   1  587.04   40.40
   2  -2   1  656.73   39.60
   2  -2   1  619.14   36.80
   2  -2   1  578.24   39.80
   2  -2   1  578.74   39.10
  -3   2  -1  408.96   30.00
  -3   2  -1  433.46   31.90
  -3   2  -1  421.66   32.20
  -3   2  -1  424.26   30.90
   3  -2   1  428.36   27.30
   3  -2   1  448.16   36.70
   3  -2   1  397.06   30.50
   3  -2   1  383.16   29.60
   3  -2   1  423.16   30.50
  -4   2  -1  185.38   22.60
  -4   2  -1  204.48   20.80
  -4   2  -1  134.69   18.00
  -4   2  -1  138.69   14.90
  -4   2  -1  170.78   19.70
   4  -2   1  160.78   19.10
   4  -2   1  200.08   15.80
   4  -2   1  155.78   26.90
   4  -2   1  155.68   19.70
  -5   2  -1   65.19   15.20
  -5   2  -1   65.99   17.40
  -5   2  -1   71.89   16.30
   5  -2   1   19.20   22.20
   5  -2   1   60.59   15.60
   5  -2   1   44.00   10.00
   5  -2   1   53.89   14.70
  -6   2  -1  145.39   24.10
  -6   2  -1  149.99   27.50
   6  -2   1  143.59   24.10
   6  -2   1  136.19   23.00
   6  -2   1  156.18   33.90
  -7   2  -1   19.50   22.50
   7  -2   1   29.80   30.70
   7  -2   1   23.20   20.40
  -8   2  -1 1083.49   86.79
   8  -2   1 1029.00   92.39
   8  -2   1 1026.10   79.99
  -9   2  -1   33.30   30.60
   9  -2   1  -50.19   34.00
   9  -2   1   22.50   26.50
  10   1  -1   -0.40   28.50
   9   1  -1  373.46   46.60
   9   1  -1  482.85   55.59
  -9  -1   1  540.45   77.19
   8   1  -1   18.80   18.80
   8   1  -1  -26.60   16.90
   8   1  -1   30.90   23.20
   8   1  -1   17.00   25.90
  -8  -1   1   29.90   23.10
   7   1  -1 1263.67   91.19
   7   1  -1 1301.67   87.59
   7   1  -1 1247.78   97.99
   7   1  -1 1322.47   87.79
   7   1  -1 1269.97   87.99
  -7  -1   1 1272.07   86.59
  -7  -1   1 1017.60   96.79
   6   1  -1   22.10   23.90
   6   1  -1  -22.10   16.30
   6   1  -1   -1.00   12.60
   6   1  -1   -6.00   13.30
   6   1  -1   -5.60   13.40
  -6  -1   1    0.00   11.70
  -6  -1   1    9.30    9.80
   5   1  -1  752.12   55.19
   5   1  -1  797.12   55.09
   5   1  -1  736.23   52.39
   5   1  -1  690.13   52.19
   5   1  -1  730.13   62.79
  -5  -1   1  753.62   52.79
  -5  -1   1  779.02   50.49
   4   1  -1   58.19   12.70
   4   1  -1   53.69   20.90
   4   1  -1   59.79   12.30
   4   1  -1   65.59   12.30
   4   1  -1   56.79   13.30
  -4  -1   1   57.59   11.40
  -4  -1   1   71.69   10.50
   3   1  -1  727.13   45.70
   3   1  -1  692.23   45.80
   3   1  -1  585.84   51.29
   3   1  -1  704.73   47.50
   3   1  -1  739.33   47.60
  -3  -1   1  761.22   45.20
   2   1  -1 1409.76   83.39
   2   1  -1 1350.26   87.49
   2   1  -1 1458.55   83.99
   2   1  -1 1353.76   84.39
   2   1  -1 1335.97   84.89
  -2  -1   1 1408.86   83.19
   1   1  -1 6552.64  373.36
   1   1  -1 6250.47  374.86
   1   1  -1 6482.05  374.16
   1   1  -1 6601.74  373.96
   1   1  -1 6460.85  373.76
   1   1  -1 6404.46  375.76
  -1  -1   1 6058.89  373.66
  -1   1  -1 5698.03  334.37
  -1   1  -1 5527.95  333.87
  -1   1  -1 5706.23  332.97
  -1   1  -1 5743.33  334.47
   1  -1   1 5435.76  334.87
   1  -1   1 5917.91  333.27
   1  -1   1 5760.82  335.07
   1  -1   1 5780.22  333.57
   1  -1   1 5688.53  333.97
   1  -1   1 5787.32  334.17
  -2   1  -1 1201.58   74.49
  -2   1  -1 1194.58   75.09
  -2   1  -1 1194.18   73.59
   2  -1   1 1202.68   74.49
   2  -1   1 1253.47   74.29
   2  -1   1 1275.97   78.29
   2  -1   1 1148.79   74.09
   2  -1   1 1243.28   73.39
   2  -1   1 1232.18   74.29
  -3   1  -1  683.13   45.40
  -3   1  -1  701.93   45.90
   3  -1   1  680.13   45.10
   3  -1   1  707.63   45.90
   3  -1   1  666.53   44.90
   3  -1   1  709.13   44.30
   3  -1   1  612.24   50.69
  -4   1  -1 2125.19  137.49
  -4   1  -1 2367.26  137.19
  -4   1  -1 2393.06  136.79
   4  -1   1 1808.32  140.39
   4  -1   1 2200.18  136.19
   4  -1   1 2327.07  135.29
   4  -1   1 2259.17  136.69
  -5   1  -1  364.96   31.60
  -5   1  -1  352.66   31.40
  -5   1  -1  310.87   32.90
   5  -1   1  321.17   32.60
   5  -1   1  334.67   30.60
   5  -1   1  348.97   29.00
   5  -1   1  272.67   37.90
  -6   1  -1  697.63   57.89
  -6   1  -1  812.42   56.19
   6  -1   1  779.82   55.89
   6  -1   1  715.03   52.19
   6  -1   1  732.43   56.29
   6  -1   1  601.34   62.49
  -7   1  -1  646.94   55.09
  -7   1  -1  560.94   49.80
   7  -1   1  574.54   51.89
   7  -1   1  477.45   62.09
  -8   1  -1    2.20   23.20
   8  -1   1   -1.00   22.80
   8  -1   1    8.30   34.30
  -9   1  -1  190.48   40.10
   9  -1   1  111.09   34.80
   9  -1   1   78.39   43.00
  10  -1   1   46.30   53.69
  10   0  -1  136.79   38.70
   9   0  -1   48.70   27.90
   9   0  -1   13.70   30.70
   9   0  -1   62.39   25.90
  -9   0   1   91.39   30.90
   8   0  -1  603.14   54.69
   8   0  -1  604.84   57.19
   8   0  -1  617.04   63.39
  -8   0   1  550.24   58.19
   7   0  -1  281.57   32.40
   7   0  -1  272.47   34.80
   7   0  -1  284.77   35.10
   7   0  -1  306.27   39.70
  -7   0   1  255.27   44.10
  -7   0   1  215.48   29.90
   6   0  -1   27.80   14.70
   6   0  -1   29.40   25.30
   6   0  -1   30.30   13.10
   6   0  -1   19.10   15.60
   6   0  -1   19.60   17.30
  -6   0   1   -0.90   22.60
  -6   0   1   10.00   13.50
  -6   0   1   34.00   10.40
   5   0  -1 2187.38  136.49
   5   0  -1 2264.97  144.39
   5   0  -1 2264.27  139.79
   5   0  -1 2075.69  136.69
   5   0  -1 2279.97  137.09
  -5   0   1 2267.97  133.49
  -5   0   1 2073.39  136.59
   4   0  -1   90.69   21.30
   4   0  -1  116.79   15.30
   4   0  -1   95.69   15.10
   4   0  -1   97.99   17.10
   4   0  -1   95.29   14.40
  -4   0   1  107.49   15.10
   3   0  -1 2137.99  134.29
   3   0  -1 2058.09  139.09
   3   0  -1 2354.06  135.19
   3   0  -1 2369.16  136.19
   3   0  -1 2216.78  134.99
  -3   0   1 2264.57  135.09
   2   0  -1  358.46   30.70
   2   0  -1  378.26   26.90
   2   0  -1  402.66   27.10
   2   0  -1  427.36   27.70
   2   0  -1  411.76   26.50
   1   0  -1 1704.63  101.39
   1   0  -1 1620.64  103.29
   1   0  -1 1699.13  101.19
   1   0  -1 1719.53  101.19
   1   0  -1 1818.82  100.99
  -1   0   1 1731.33  101.29
  -1   0   1 1687.13  100.29
  -1   0  -1 1637.14   91.39
  -1   0  -1 1553.44   90.89
   1   0   1 1501.15   91.09
   1   0   1 1593.54   90.99
   1   0   1 1504.35   92.09
   1   0   1 1472.25   93.09
   1   0   1 1524.95   91.69
   1   0   1 1487.95   90.79
   1   0   1 1525.05   90.79
  -2   0  -1 1331.97   79.49
   2   0   1 1345.97   79.99
   2   0   1 1326.17   80.29
   2   0   1 1355.76   80.89
   2   0   1 1170.48   82.39
   2   0   1 1326.37   79.29
   2   0   1 1314.37   79.89
  -3   0  -1 6425.86  368.06
   3   0   1 6382.66  369.06
   3   0   1 6140.09  368.36
   3   0   1 6528.65  370.06
   3   0   1 5554.44  371.26
   3   0   1 6453.65  368.66
  -4   0  -1  119.39   14.70
   4   0   1  111.79   19.00
   4   0   1  120.59   16.50
   4   0   1  150.38   18.00
   4   0   1  117.49   21.30
   4   0   1  110.69   16.10
  -5   0  -1 2828.12  170.58
  -5   0  -1 2787.72  172.48
   5   0   1 2793.22  171.68
   5   0   1 3034.10  174.98
   5   0   1 2592.84  170.78
   5   0   1 2626.74  176.98
   5   0   1 2884.61  172.08
  -6   0  -1  425.76   36.40
  -6   0  -1  412.46   39.10
   6   0   1  416.16   48.70
   6   0   1  405.36   36.80
   6   0   1  387.06   37.10
   6   0   1  379.56   36.60
  -7   0  -1  621.54   52.09
  -7   0  -1  664.63   56.39
   7   0   1  675.03   65.49
   7   0   1  655.93   55.59
   7   0   1  614.14   51.79
  -8   0  -1  641.44   59.19
   8   0   1  576.74   58.79
   8   0   1  550.54   67.49
   9   0   1   -2.00   26.90
   9   0   1    9.40   33.40
  10  -1  -1   95.49   33.70
 -10   1   1  111.19   38.70
   9  -1  -1   -5.10   21.90
   9  -1  -1   19.80   31.00
   9  -1  -1   25.90   28.10
  -9   1   1   54.69   30.30
   8  -1  -1   19.40   21.30
   8  -1  -1   25.90   25.80
   8  -1  -1   22.90   23.80
  -8   1   1   14.40   23.20
   7  -1  -1   30.40   17.90
   7  -1  -1   36.90   19.10
   7  -1  -1   48.00   24.60
  -7   1   1   39.70   26.60
  -7   1   1   43.20   17.70
   6  -1  -1 1182.78   80.59
   6  -1  -1 1282.27   84.29
   6  -1  -1 1301.67   87.69
   6  -1  -1 1205.58   83.99
  -6   1   1 1259.57   84.59
  -6   1   1 1208.28   90.99
   5  -1  -1  189.98   20.10
   5  -1  -1  189.48   23.00
   5  -1  -1  206.18   23.40
   5  -1  -1  163.38   25.70
  -5   1   1  187.78   19.90
  -5   1   1  189.08   31.60
  -5   1   1  200.08   24.10
   4  -1  -1 3298.17  198.78
   4  -1  -1 3428.16  198.58
   4  -1  -1 3474.65  201.68
   4  -1  -1 3346.57  197.08
  -4   1   1 3364.86  196.68
  -4   1   1 3205.68  198.58
  -4   1   1 2956.50  203.08
   3  -1  -1   74.99   11.10
   3  -1  -1   78.99   14.10
   3  -1  -1   94.09   12.60
   3  -1  -1  110.49   11.40
   3  -1  -1  111.59   18.50
  -3   1   1   68.99   17.10
  -3   1   1  100.59   11.40
  -3   1   1   67.79   11.80
   2  -1  -1   86.79    9.90
   2  -1  -1   71.59    9.30
   2  -1  -1   54.79    8.60
   2  -1  -1   81.59   12.00
  -2   1   1   62.79    9.20
  -2   1   1   75.49   15.10
  -2   1   1   98.99   10.30
   1  -1  -1 7422.36  419.76
   1  -1  -1 6820.32  420.06
   1  -1  -1 7308.97  419.96
   1  -1  -1 7323.07  419.86
  -1   1   1 7043.20  419.26
  -1   1   1 7256.47  418.26
  -1   1   1 7154.58  419.96
  -1   1   1 7172.68  422.16
   0  -1  -1  355.66   20.30
   0  -1  -1  331.37   21.20
   0  -1  -1  316.77   22.20
   0   1   1  304.97   21.30
   0   1   1  311.17   22.20
   0   1   1  314.97   20.70
   0   1   1  296.87   21.50
  -1  -1  -1 9361.56  539.85
  -1  -1  -1 9599.74  542.65
  -1  -1  -1 8639.04  540.15
   1   1   1 9999.00  541.55
   1   1   1 9163.08  542.35
   1   1   1 9014.90  541.65
   1   1   1 9399.26  542.55
   1   1   1 9007.70  541.45
  -2  -1  -1  877.71   53.59
   2   1   1  933.41   54.69
   2   1   1  923.21   57.99
   2   1   1  807.02   55.99
   2   1   1  861.41   54.69
   2   1   1  879.91   56.59
  -3  -1  -1 3253.27  188.28
   3   1   1 3120.89  192.88
   3   1   1 3136.49  191.18
   3   1   1 3237.98  192.38
   3   1   1 3184.78  189.38
   3   1   1 3094.09  188.98
  -4  -1  -1  220.98   19.20
   4   1   1  185.38   26.20
   4   1   1  222.88   22.20
   4   1   1  188.98   22.80
   4   1   1  190.38   25.70
   4   1   1  171.18   19.60
  -5  -1  -1   48.30   11.90
  -5  -1  -1   27.30   13.10
   5   1   1   26.60   17.60
   5   1   1   28.00   14.60
   5   1   1   61.69   15.50
   5   1   1   53.79   14.40
   5   1   1   25.30   18.20
  -6  -1  -1    2.20   14.10
  -6  -1  -1   18.50   11.40
   6   1   1   -3.10   19.20
   6   1   1    5.90   14.50
   6   1   1    1.10   23.20
   6   1   1   20.50   15.40
   6   1   1   31.80   15.70
  -7  -1  -1 1176.48   83.59
  -7  -1  -1 1289.97   88.69
   7   1   1 1301.47   88.89
   7   1   1 1252.47   88.69
   7   1   1 1187.78   97.29
   8   1   1   35.10   25.20
   8   1   1   65.89   37.20
   8   1   1   30.50   33.30
   9   1   1  238.88   49.50
  10  -2  -1  240.48   42.00
 -10   2   1  336.87   55.59
   9  -2  -1   44.70   29.80
   9  -2  -1   40.60   25.40
   9  -2  -1   52.69   28.80
  -9   2   1   63.29   32.30
   8  -2  -1 1218.58   87.19
   8  -2  -1 1013.90   86.39
   8  -2  -1 1177.58   90.99
  -8   2   1 1178.68   92.09
   7  -2  -1   17.10   18.20
   7  -2  -1   14.50   17.20
   7  -2  -1   29.70   23.70
  -7   2   1   13.60   26.90
   6  -2  -1  887.31   69.69
   6  -2  -1  801.92   62.69
   6  -2  -1  825.32   63.79
  -6   2   1  939.81   65.59
  -6   2   1  953.30   70.79
   5  -2  -1   17.80   12.70
   5  -2  -1    7.50   12.10
   5  -2  -1   26.60   18.40
  -5   2   1   -4.00   10.60
  -5   2   1    9.40   18.80
  -5   2   1    5.50   11.00
   4  -2  -1  236.38   21.80
   4  -2  -1  156.98   24.50
   4  -2  -1  221.48   22.10
  -4   2   1  209.08   22.60
  -4   2   1  194.08   20.20
  -4   2   1  203.48   27.70
  -4   2   1  203.58   17.50
   3  -2  -1  212.88   18.40
   3  -2  -1  219.48   19.40
   3  -2  -1  189.98   18.80
   3  -2  -1  208.88   23.50
  -3   2   1  233.78   15.40
  -3   2   1  206.08   19.60
  -3   2   1  183.98   19.40
  -3   2   1  179.18   23.40
   2  -2  -1  166.48   15.90
   2  -2  -1  165.38   17.00
   2  -2  -1  164.78   15.20
   2  -2  -1  190.88   15.70
   2  -2  -1  162.68   15.00
  -2   2   1  180.48   17.40
  -2   2   1  160.58   15.90
  -2   2   1  210.08   22.40
  -2   2   1  173.48   11.90
   1  -2  -1  801.22   51.19
   1  -2  -1  828.02   50.99
   1  -2  -1  813.62   51.69
   1  -2  -1  833.82   50.49
   1  -2  -1  827.62   49.50
   1  -2  -1  803.12   50.79
  -1   2   1  820.92   50.49
  -1   2   1  873.41   54.19
  -1   2   1  844.42   51.59
  -1   2   1  847.42   49.50
  -1   2   1  822.42   51.09
   0  -2  -1 4558.94  259.77
   0  -2  -1 4287.77  257.27
   0  -2  -1 4377.96  259.67
   0  -2  -1 4471.05  257.57
   0  -2  -1 4311.37  258.27
   0   2   1 4474.25  260.77
   0   2   1 4417.16  257.57
   0   2   1 4342.17  259.57
   0   2   1 4466.45  259.67
  -1  -2  -1   22.00    9.90
  -1  -2  -1   14.80    7.50
   1   2   1   25.70    8.00
   1   2   1   41.90    9.10
   1   2   1   24.60    8.10
   1   2   1   37.50    8.50
   1   2   1   47.20    9.60
  -2  -2  -1 1526.35   90.69
  -2  -2  -1 1457.75   85.79
   2   2   1 1349.96   90.39
   2   2   1 1428.96   90.39
   2   2   1 1454.55   90.19
  -3  -2  -1 1478.35   88.69
   3   2   1 1496.05   93.89
   3   2   1 1498.55   94.89
   3   2   1 1513.05   89.99
   3   2   1 1442.26   90.69
   3   2   1 1373.76   93.79
  -4  -2  -1   29.70    8.50
   4   2   1   36.60   11.30
   4   2   1   21.50   17.60
   4   2   1   49.40   14.50
   4   2   1   24.50   16.90
   4   2   1   41.20   10.40
  -5  -2  -1 1078.89   69.59
  -5  -2  -1 1119.99   71.49
  -5  -2  -1  988.20   71.19
   5   2   1 1121.69   72.69
   5   2   1  979.30   70.99
   5   2   1 1108.59   80.69
   5   2   1 1140.89   78.89
   5   2   1 1086.29   75.99
  -6  -2  -1  -13.90   10.80
  -6  -2  -1   -7.70   11.80
   6   2   1   11.60   17.90
   6   2   1   47.00   26.20
   6   2   1   -9.30   14.80
   6   2   1  -13.20   18.70
   7   2   1  190.48   35.60
   7   2   1  234.08   31.80
   7   2   1  182.28   41.50
   7   2   1  220.58   33.80
  -8  -2  -1   96.59   31.30
   8   2   1   68.49   26.60
   8   2   1   57.99   35.00
  -9  -2  -1   72.09   35.50
   9   2   1   26.90   38.30
  10  -3  -1   55.59   47.10
 -10   3   1  217.28   64.49
   9  -3  -1  303.97   41.40
   9  -3  -1  291.07   56.89
  -9   3   1  318.27   51.29
   8  -3  -1   64.89   27.00
   8  -3  -1   59.99   25.30
   8  -3  -1   32.50   27.80
  -8   3   1   55.89   29.60
   7  -3  -1  263.37   35.40
   7  -3  -1  242.58   41.10
   7  -3  -1  309.17   37.70
  -7   3   1  258.47   38.80
   6  -3  -1  268.17   33.20
   6  -3  -1  331.67   35.40
   6  -3  -1  288.67   40.00
  -6   3   1  255.07   32.40
  -6   3   1  368.76   41.30
   5  -3  -1  101.49   17.60
   5  -3  -1   91.09   18.40
   5  -3  -1   56.19   21.30
  -5   3   1   92.59   23.90
  -5   3   1   98.29   19.10
   4  -3  -1 1870.41  116.59
   4  -3  -1 1963.00  118.09
   4  -3  -1 1862.81  116.89
   4  -3  -1 1712.73  120.09
  -4   3   1 1927.01  113.69
  -4   3   1 1849.21  111.59
  -4   3   1 1798.82  117.19
  -4   3   1 1962.80  120.69
   3  -3  -1   26.40    9.20
   3  -3  -1   26.10    8.80
   3  -3  -1   18.00    8.60
   3  -3  -1   23.30   12.30
  -3   3   1   23.60    9.80
  -3   3   1   26.10    8.40
  -3   3   1   33.50   15.50
  -3   3   1   26.10    4.70
   2  -3  -1 3091.09  173.98
   2  -3  -1 2989.90  176.98
   2  -3  -1 2870.81  176.38
   2  -3  -1 3004.40  175.58
   2  -3  -1 2841.12  175.98
   2  -3  -1 3019.60  175.88
  -2   3   1 2910.61  174.98
  -2   3   1 2929.31  173.18
  -2   3   1 3015.10  173.38
  -2   3   1 2821.22  176.08
  -2   3   1 2937.11  179.48
   1  -3  -1  139.99   14.30
   1  -3  -1  129.29   12.10
   1  -3  -1  124.99   10.90
   1  -3  -1  121.59   10.90
   1  -3  -1  136.99   12.90
   1  -3  -1  124.69   13.80
  -1   3   1  138.99   18.50
  -1   3   1  103.89   11.60
  -1   3   1  140.49   13.90
  -1   3   1  138.69   13.10
  -1   3   1  108.49   10.30
   0  -3  -1  364.16   22.20
   0  -3  -1  379.26   23.60
   0  -3  -1  378.96   26.80
   0  -3  -1  360.86   26.90
   0  -3  -1  363.96   24.90
   0   3   1  366.46   23.90
   0   3   1  330.47   26.40
   0   3   1  382.56   26.80
   0   3   1  368.16   29.10
   0   3   1  359.66   23.30
  -1  -3  -1    9.50    2.30
  -1  -3  -1    5.30    7.70
  -1  -3  -1   -8.80    7.90
  -1  -3  -1    4.30    6.00
   1   3   1    2.30    9.40
   1   3   1   15.10    9.80
   1   3   1    2.80    7.00
  -2  -3  -1 1037.40   67.59
  -2  -3  -1 1032.00   71.19
  -2  -3  -1 1067.89   70.49
  -2  -3  -1 1135.39   64.89
  -2  -3  -1 1070.99   63.89
  -2  -3  -1 1137.09   63.99
   2   3   1 1026.80   70.29
   2   3   1 1087.39   70.79
   2   3   1 1013.50   70.29
  -3  -3  -1    2.20    7.90
  -3  -3  -1    8.00   11.60
  -3  -3  -1    5.50    4.70
   3   3   1    1.90   10.10
   3   3   1    9.20   12.20
   3   3   1    4.30   12.00
  -4  -3  -1 2641.64  161.78
  -4  -3  -1 2587.94  158.98
  -4  -3  -1 2614.14  158.18
  -4  -3  -1 2662.73  165.18
   4   3   1 2523.65  165.78
   4   3   1 2734.63  167.78
   4   3   1 2845.72  168.08
  -5  -3  -1  101.59   19.70
  -5  -3  -1   68.79   19.60
  -5  -3  -1   88.49   16.10
   5   3   1   98.99   23.00
   5   3   1  146.59   28.10
   5   3   1   79.89   24.90
  -6  -3  -1  828.52   65.79
  -6  -3  -1  743.23   58.49
   6   3   1  786.22   66.29
   6   3   1  792.52   71.49
   6   3   1  899.71   69.69
  -7  -3  -1  272.77   40.40
   7   3   1  361.26   52.39
   7   3   1  393.36   47.70
  -8  -3  -1   32.80   30.40
   8   3   1   -2.20   23.80
   8   3   1   10.10   36.60
  -9  -3  -1  267.57   48.50
   9   3   1  389.46   60.29
   9  -4  -1  214.98   38.90
  -9   4   1  169.48   43.10
   8  -4  -1   75.39   31.60
   8  -4  -1   55.49   27.30
   8  -4  -1   95.29   28.00
  -8   4   1   79.59   32.70
   7  -4  -1  134.09   33.50
   7  -4  -1  128.29   26.80
   7  -4  -1  150.88   28.00
  -7   4   1   85.19   27.90
   6  -4  -1  362.36   45.50
   6  -4  -1  370.96   38.00
   6  -4  -1  322.07   36.50
  -6   4   1  371.16   38.20
  -6   4   1  294.87   39.70
  -6   4   1  323.67   43.30
   5  -4  -1 1390.26  117.69
   5  -4  -1 1781.02  113.19
   5  -4  -1 1985.00  115.39
  -5   4   1 1880.11  119.29
  -5   4   1 1784.72  114.39
   4  -4  -1   -3.30   10.30
   4  -4  -1   -1.10   10.50
   4  -4  -1   -5.70   14.30
   4  -4  -1   -2.70   11.90
  -4   4   1   -1.80    9.50
  -4   4   1   16.20   18.70
  -4   4   1  -12.00    9.40
  -4   4   1    1.20    4.70
   3  -4  -1 1559.14  100.09
   3  -4  -1 1565.84  101.19
   3  -4  -1 1719.13  100.59
   3  -4  -1 1657.03  103.49
  -3   4   1 1666.63   96.59
  -3   4   1 1608.24   97.79
  -3   4   1 1485.95  100.89
  -3   4   1 1627.44  104.99
   2  -4  -1 2750.12  174.38
   2  -4  -1 2913.51  173.68
   2  -4  -1 2842.32  173.08
   2  -4  -1 3026.00  171.48
   2  -4  -1 2933.11  172.68
   2  -4  -1 2857.91  174.78
   2  -4  -1 2947.80  170.28
  -2   4   1 2803.42  173.58
  -2   4   1 2820.12  177.58
  -2   4   1 2900.81  172.58
  -2   4   1 2952.10  170.48
  -2   4   1 2930.71  170.98
   1  -4  -1  443.66   29.70
   1  -4  -1  450.75   28.30
   1  -4  -1  431.26   29.70
   1  -4  -1  431.96   31.80
   1  -4  -1  450.35   32.50
   1  -4  -1  457.85   29.30
  -1   4   1  392.36   29.70
  -1   4   1  432.06   31.20
  -1   4   1  420.16   28.70
  -1   4   1  462.15   30.60
  -1   4   1  410.86   36.30
  -1   4   1  435.36   29.80
   0  -4  -1 3739.73  222.98
   0  -4  -1 3801.42  226.58
   0  -4  -1 3677.13  225.68
   0  -4  -1 3794.12  224.28
   0   4   1 3793.32  222.98
   0   4   1 3806.42  228.78
   0   4   1 3754.82  226.18
   0   4   1 3831.22  226.08
   0   4   1 3756.62  224.08
   0   4   1 3956.40  223.68
  -1  -4  -1   43.90   10.60
  -1  -4  -1   49.00    5.10
  -1  -4  -1   41.40    8.50
  -1  -4  -1   17.70    9.90
   1   4   1   35.80   12.80
   1   4   1   51.79   11.90
   1   4   1   72.59   16.00
  -2  -4  -1 2384.66  148.49
  -2  -4  -1 2258.17  148.19
  -2  -4  -1 2424.86  141.09
  -2  -4  -1 2378.86  145.69
   2   4   1 2492.15  149.88
   2   4   1 2444.46  149.59
   2   4   1 2464.85  150.38
  -3  -4  -1  109.09   10.60
  -3  -4  -1   95.39   19.80
  -3  -4  -1   96.79   20.10
  -3  -4  -1   98.49    9.40
  -3  -4  -1   82.19   13.90
   3   4   1   92.79   21.30
   3   4   1  123.69   22.40
   3   4   1   88.29   19.70
  -4  -4  -1  521.75   38.10
  -4  -4  -1  368.46   42.00
  -4  -4  -1  440.46   43.20
   4   4   1  507.25   44.50
   4   4   1  452.55   44.80
   4   4   1  463.25   43.00
  -5  -4  -1  176.88   23.90
  -5  -4  -1  150.88   28.90
  -5  -4  -1  185.98   32.20
   5   4   1  260.97   38.40
   5   4   1  255.67   35.20
   5   4   1  255.17   35.90
  -6  -4  -1  180.58   32.50
  -6  -4  -1  130.09   32.60
   6   4   1  150.08   34.20
   6   4   1  148.39   34.10
   6   4   1  117.39   28.90
  -7  -4  -1  150.28   37.50
  -7  -4  -1  175.78   37.80
   7   4   1  310.77   44.80
   7   4   1  220.18   45.00
  -8  -4  -1  426.46   58.79
   8   4   1  598.64   71.29
   8   4   1  718.83   71.29
  -9  -4  -1   83.99   36.40
   9   4   1   15.00   30.20
   9  -5  -1  439.56   54.29
  -9   5   1  491.45   60.39
   8  -5  -1  -14.60   21.90
   8  -5  -1   -7.30   24.40
   8  -5  -1   -2.30   28.10
  -8   5   1   34.60   29.70
   7  -5  -1 1181.78   94.39
   7  -5  -1 1157.88   85.89
   7  -5  -1 1057.09   82.39
  -7   5   1 1158.38   88.79
   6  -5  -1  181.28   38.80
   6  -5  -1  262.07   32.60
   6  -5  -1  271.07   32.70
  -6   5   1  242.28   36.60
  -6   5   1  247.08   39.70
   5  -5  -1  553.14   57.09
   5  -5  -1  638.44   51.19
   5  -5  -1  655.53   49.10
   5  -5  -1  633.74   48.70
  -5   5   1  658.63   50.29
  -5   5   1  623.44   56.29
  -5   5   1  558.84   52.09
   4  -5  -1  360.16   32.80
   4  -5  -1  385.96   32.30
   4  -5  -1  344.57   34.30
   4  -5  -1  360.26   39.50
  -4   5   1  378.46   34.20
  -4   5   1  432.76   37.30
  -4   5   1  379.96   39.80
   3  -5  -1  285.97   30.80
   3  -5  -1  239.88   26.50
   3  -5  -1  243.78   24.80
   3  -5  -1  288.17   26.80
   3  -5  -1  234.08   23.30
   3  -5  -1  252.97   23.10
  -3   5   1  254.77   21.30
  -3   5   1  274.87   19.60
  -3   5   1  242.08   25.40
  -3   5   1  252.17   32.70
  -3   5   1  270.87   27.10
   2  -5  -1  962.90   62.19
   2  -5  -1  920.41   64.09
   2  -5  -1  962.20   61.69
   2  -5  -1  888.81   63.29
   2  -5  -1  992.80   59.39
   2  -5  -1 1021.70   60.39
   2  -5  -1  999.90   60.69
  -2   5   1  888.71   62.59
  -2   5   1  984.60   61.99
  -2   5   1  969.80   58.89
  -2   5   1  936.41   62.69
  -2   5   1  930.91   59.29
  -2   5   1  951.40   68.29
   1  -5  -1 3575.24  215.88
   1  -5  -1 3697.53  214.08
   1  -5  -1 3628.64  219.08
   1  -5  -1 3662.33  216.08
   1  -5  -1 3653.73  215.78
   1  -5  -1 3610.34  218.28
  -1   5   1 3457.75  216.28
  -1   5   1 3728.63  217.98
  -1   5   1 3593.84  216.58
  -1   5   1 3813.02  216.78
  -1   5   1 3658.13  215.48
  -1   5   1 3578.24  222.28
   0  -5  -1  547.15   37.10
   0  -5  -1  523.05   38.90
   0  -5  -1  553.64   35.20
   0  -5  -1  504.15   39.90
   0  -5  -1  528.75   36.00
   0   5   1  600.34   36.10
   0   5   1  502.05   43.00
   0   5   1  510.15   39.20
   0   5   1  562.44   37.20
  -1  -5  -1  914.01   58.89
  -1  -5  -1  910.51   60.59
  -1  -5  -1  896.31   61.49
  -1  -5  -1  940.81   54.49
   1   5   1  842.82   61.09
   1   5   1  973.30   65.49
   1   5   1  816.42   63.39
  -2  -5  -1  587.84   46.40
  -2  -5  -1  529.15   42.00
  -2  -5  -1  609.94   46.00
   2   5   1  649.83   49.80
   2   5   1  606.54   49.10
   2   5   1  646.04   48.20
  -3  -5  -1   22.00   14.90
  -3  -5  -1    8.70   10.10
  -3  -5  -1   32.00   16.30
   3   5   1    5.80   13.20
   3   5   1   23.30   18.60
  -4  -5  -1 1470.45   97.69
  -4  -5  -1 1547.95  103.09
  -4  -5  -1 1620.04  103.89
   4   5   1 1405.96  103.49
   4   5   1 1531.95  106.19
  -5  -5  -1    7.20   19.90
  -5  -5  -1   22.40   22.00
  -5  -5  -1   12.50   12.60
   5   5   1   44.70   24.60
   5   5   1   26.50   25.50
   5   5   1    7.80   17.90
  -6  -5  -1  753.92   69.59
  -6  -5  -1  794.32   71.49
   6   5   1  844.62   72.29
   6   5   1  783.42   70.19
   6   5   1  736.83   76.49
  -7  -5  -1   92.79   33.60
   7   5   1   83.19   32.00
  -8  -5  -1  134.89   40.20
   8   5   1  139.49   38.00
   9  -6  -1   74.29   32.70
  -9   6   1  128.29   41.90
   8  -6  -1   65.79   36.00
   8  -6  -1  115.09   32.10
  -8   6   1  143.49   39.70
   7  -6  -1  128.39   38.20
   7  -6  -1  105.29   29.40
   7  -6  -1  128.39   29.70
  -7   6   1  199.58   40.20
   6  -6  -1   43.50   29.90
   6  -6  -1   28.80   20.20
   6  -6  -1   38.40   20.60
  -6   6   1   61.49   26.70
  -6   6   1   56.09   29.70
   5  -6  -1 1741.23  104.69
   5  -6  -1 1522.75  107.49
   5  -6  -1 1681.23  104.59
   5  -6  -1 1321.27  109.79
  -5   6   1 1534.45  105.59
  -5   6   1 1577.04  110.99
  -5   6   1 1604.14  108.39
   4  -6  -1   23.10   20.30
   4  -6  -1   16.30   15.50
   4  -6  -1   24.40   13.40
   4  -6  -1    3.90   11.60
  -4   6   1   25.00   16.80
  -4   6   1   20.50   13.90
  -4   6   1   23.50   24.00
   3  -6  -1 1937.31  121.89
   3  -6  -1 2080.89  121.49
   3  -6  -1 1895.51  125.59
   3  -6  -1 2055.99  128.39
   3  -6  -1 1861.11  125.59
   3  -6  -1 2085.39  123.19
  -3   6   1 1882.71  125.09
  -3   6   1 2005.50  130.39
  -3   6   1 1993.00  124.59
   2  -6  -1   -1.50   12.60
   2  -6  -1   14.30    9.10
   2  -6  -1   -4.80   10.10
   2  -6  -1    4.60    7.80
   2  -6  -1    6.90    6.20
   2  -6  -1   -0.90    6.70
  -2   6   1   -0.20    5.60
  -2   6   1   23.30   20.90
  -2   6   1    0.90   10.40
  -2   6   1   -8.10    9.50
   1  -6  -1  332.07   27.60
   1  -6  -1  380.76   31.90
   1  -6  -1  372.66   28.10
   1  -6  -1  403.36   28.90
   1  -6  -1  349.37   32.90
  -1   6   1  406.06   42.90
  -1   6   1  386.46   29.60
  -1   6   1  373.36   29.50
  -1   6   1  402.86   31.50
   0  -6  -1   10.30    8.40
   0  -6  -1   20.20    7.80
   0  -6  -1   11.50   12.50
   0  -6  -1   17.50   10.80
   0  -6  -1   11.30    6.00
   0   6   1   26.70   11.20
   0   6   1   19.70   10.10
   0   6   1   25.70   17.70
   0   6   1   58.29   20.40
   0   6   1    4.00    8.30
  -1  -6  -1  115.49   20.60
  -1  -6  -1  148.39   18.00
  -1  -6  -1  130.29   19.30
   1   6   1  138.59   25.50
   1   6   1  126.29   19.70
   1   6   1  179.18   30.20
  -2  -6  -1  249.18   25.50
  -2  -6  -1  297.77   30.60
  -2  -6  -1  277.27   32.40
   2   6   1  271.57   35.70
   2   6   1  352.86   40.00
   2   6   1  234.78   30.30
  -3  -6  -1 1489.85   92.69
  -3  -6  -1 1419.26   90.79
  -3  -6  -1 1410.16   87.29
   3   6   1 1253.47   91.89
   3   6   1 1067.09   92.99
  -4  -6  -1  262.47   33.90
  -4  -6  -1  178.58   23.70
  -4  -6  -1  183.58   30.70
   4   6   1  183.98   31.30
   4   6   1  259.37   40.00
  -5  -6  -1  823.42   68.89
  -5  -6  -1  857.11   70.29
   5   6   1  986.80   78.09
   5   6   1  751.52   70.19
  -6  -6  -1  142.79   36.50
   6   6   1  213.48   43.50
   6   6   1  207.88   40.90
  -7  -6  -1  108.59   34.40
   7   6   1  194.18   42.80
   8   6   1  517.25   63.69
   8  -7  -1  -26.60   21.30
  -8   7   1  -14.70   31.50
   7  -7  -1  273.77   49.00
   7  -7  -1  290.67   39.10
  -7   7   1  332.77   50.29
   6  -7  -1  203.08   31.50
   6  -7  -1  277.87   35.10
   6  -7  -1  222.68   44.20
  -6   7   1  239.28   38.70
  -6   7   1  263.77   44.20
   5  -7  -1  203.68   38.80
   5  -7  -1  190.18   31.90
   5  -7  -1  211.68   27.90
   5  -7  -1  211.58   29.10
  -5   7   1  210.18   34.20
  -5   7   1  180.98   37.90
   4  -7  -1  785.42   53.89
   4  -7  -1  742.13   52.49
   4  -7  -1  780.02   64.69
   4  -7  -1  637.94   57.99
  -4   7   1  701.43   57.69
  -4   7   1  700.33   64.39
  -4   7   1  647.54   54.69
   3  -7  -1  130.49   22.10
   3  -7  -1  181.38   31.30
   3  -7  -1  187.48   26.60
   3  -7  -1  135.29   19.10
   3  -7  -1  111.49   17.00
  -3   7   1  165.18   33.20
  -3   7   1   93.29   20.10
  -3   7   1  152.68   23.30
   2  -7  -1  451.55   41.30
   2  -7  -1  509.15   37.70
   2  -7  -1  515.55   44.00
   2  -7  -1  515.65   38.00
  -2   7   1  506.15   41.10
  -2   7   1  601.24   42.40
  -2   7   1  505.05   49.40
   1  -7  -1 1439.26  101.19
   1  -7  -1 1541.25   99.69
   1  -7  -1 1519.25   95.59
   1  -7  -1 1574.74   96.69
  -1   7   1 1542.45   97.49
  -1   7   1 1641.24   98.89
  -1   7   1 1646.44   98.19
  -1   7   1 1392.06  105.39
   0  -7  -1  125.99   23.60
   0  -7  -1  170.88   19.00
   0  -7  -1  143.09   15.90
   0  -7  -1  138.19   20.30
   0   7   1  131.09   20.70
   0   7   1  110.29   17.30
   0   7   1  155.48   30.30
   0   7   1  140.99   30.10
  -1  -7  -1 2615.74  162.48
  -1  -7  -1 2655.93  159.48
  -1  -7  -1 2706.53  163.88
  -1  -7  -1 2686.63  166.68
   1   7   1 2477.15  170.08
   1   7   1 2753.72  172.78
   1   7   1 2653.93  166.38
  -2  -7  -1   80.49   22.70
  -2  -7  -1   87.79   19.10
  -2  -7  -1   57.19   15.40
   2   7   1   56.89   24.00
   2   7   1   51.99   18.20
   2   7   1   90.39   26.70
  -3  -7  -1  845.22   61.69
  -3  -7  -1  944.31   64.69
  -3  -7  -1  926.41   67.49
   3   7   1  705.73   70.79
   3   7   1  800.72   67.69
  -4  -7  -1   74.99   27.70
  -4  -7  -1   37.50   21.40
   4   7   1   39.60   25.50
   4   7   1   23.80   27.50
  -5  -7  -1   16.00   26.70
   5   7   1  -24.60   23.80
   5   7   1  -14.40   27.50
  -6  -7  -1   44.10   31.10
   6   7   1    4.10   30.80
  -7  -7  -1  198.38   43.10
   7   7   1  199.58   44.40
  -8  -7  -1   -0.60   50.59
   8  -8  -1  490.75   54.79
  -8   8   1  527.25   68.39
   7  -8  -1   62.69   36.00
   7  -8  -1   -3.80   21.10
  -7   8   1    1.00   30.30
   6  -8  -1  651.53   57.09
  -6   8   1  642.24   67.99
  -6   8   1  685.73   66.19
   5  -8  -1    8.30   23.80
   5  -8  -1   36.70   18.70
   5  -8  -1   81.59   33.20
  -5   8   1   38.70   31.50
  -5   8   1   -0.90   23.20
   4  -8  -1  315.17   43.10
   4  -8  -1  278.47   39.30
   4  -8  -1  347.17   33.50
  -4   8   1  313.27   38.70
  -4   8   1  201.78   30.80
  -4   8   1  255.77   43.30
   3  -8  -1  535.65   43.80
   3  -8  -1  579.94   53.49
   3  -8  -1  582.54   56.39
  -3   8   1  580.74   49.60
  -3   8   1  606.24   50.19
  -3   8   1  617.84   58.69
   2  -8  -1   86.79   15.50
   2  -8  -1   81.09   15.10
   2  -8  -1   87.69   23.00
   2  -8  -1  118.69   21.10
  -2   8   1   43.20   18.00
  -2   8   1   94.49   30.70
  -2   8   1  119.29   21.70
   1  -8  -1  554.14   50.39
   1  -8  -1  525.55   49.00
   1  -8  -1  590.34   46.40
   1  -8  -1  590.84   43.20
  -1   8   1  545.15   57.59
  -1   8   1  594.94   47.10
  -1   8   1  614.24   58.19
   0  -8  -1  551.04   42.10
   0  -8  -1  529.15   43.40
   0  -8  -1  523.95   47.80
   0   8   1  539.65   44.30
   0   8   1  456.85   51.99
   0   8   1  634.74   58.99
  -1  -8  -1   73.59   16.80
  -1  -8  -1   37.40   19.20
  -1  -8  -1   60.59   16.90
   1   8   1   92.39   27.20
   1   8   1   30.80   26.40
   1   8   1   42.10   18.30
  -2  -8  -1  289.57   32.10
  -2  -8  -1  288.87   31.10
  -2  -8  -1  349.96   40.20
   2   8   1  274.77   35.80
   2   8   1  232.58   41.00
  -3  -8  -1  463.65   49.90
  -3  -8  -1  508.55   45.30
   3   8   1  420.26   57.49
   3   8   1  481.75   49.99
  -4  -8  -1   41.70   26.00
   4   8   1    7.60   25.20
   4   8   1  -12.70   27.90
  -5  -8  -1  468.95   55.69
   5   8   1  455.25   60.29
   5   8   1  457.05   56.99
  -6  -8  -1  -18.10   27.40
   6   8   1  -41.50   26.40
  -7  -8  -1  127.99   41.80
   7   8   1  228.08   48.20
   8  -9  -1  104.79   46.80
   7  -9  -1  -42.80   21.20
  -7   9   1   40.40   37.50
   6  -9  -1  169.38   38.30
   6  -9  -1  120.99   28.00
   6  -9  -1  111.89   42.50
  -6   9   1  137.19   36.80
  -6   9   1  101.89   37.20
   5  -9  -1   71.29   27.90
   5  -9  -1   -6.30   16.60
   5  -9  -1   10.10   32.60
  -5   9   1   15.30   27.80
  -5   9   1   19.90   31.70
   4  -9  -1  828.82   80.29
   4  -9  -1  861.31   62.69
   4  -9  -1  793.62   72.79
  -4   9   1  866.41   70.99
  -4   9   1  879.31   80.69
   3  -9  -1   19.00   21.80
   3  -9  -1   16.40   29.80
  -3   9   1   -4.60   19.70
  -3   9   1   32.70   31.70
  -3   9   1   37.70   22.20
   2  -9  -1  978.50   77.69
   2  -9  -1 1046.90   73.39
  -2   9   1 1015.00   86.19
  -2   9   1  890.31   81.79
   1  -9  -1   30.50   14.10
   1  -9  -1   93.69   22.90
   1  -9  -1   68.29   23.90
   1  -9  -1   49.50   18.50
  -1   9   1  102.29   33.10
  -1   9   1   62.29   34.00
   0  -9  -1  238.48   35.20
   0  -9  -1  179.38   23.70
   0  -9  -1  184.18   25.90
   0   9   1  176.28   39.50
   0   9   1  147.79   39.20
   0   9   1  209.38   28.40
  -1  -9  -1  215.58   28.60
  -1  -9  -1  205.28   32.90
  -1  -9  -1  195.48   33.30
   1   9   1  142.19   27.60
   1   9   1  188.38   43.10
   1   9   1  195.38   40.20
  -2  -9  -1  429.66   49.70
   2   9   1  523.95   53.69
   2   9   1  349.37   55.59
  -3  -9  -1  197.88   39.10
   3   9   1  186.68   35.50
   3   9   1  132.49   38.90
  -4  -9  -1  692.63   71.09
   4   9   1  799.32   83.59
   4   9   1  670.43   70.19
  -5  -9  -1   18.20   31.20
   5   9   1   81.79   34.60
   5   9   1   73.69   35.30
  -6  -9  -1   43.00   33.90
   6   9   1  154.28   44.10
  -7  10   1   37.30   40.40
   6 -10  -1  230.28   44.20
   6 -10  -1  219.58   48.10
  -6  10   1  279.37   50.89
   5 -10  -1  213.38   49.20
   5 -10  -1  153.08   37.40
  -5  10   1  185.88   42.00
  -5  10   1  292.07   50.19
   4 -10  -1   25.60   26.80
   4 -10  -1   25.20   35.60
  -4  10   1   84.39   37.60
   3 -10  -1   96.49   30.40
   3 -10  -1   95.09   40.70
  -3  10   1   52.49   36.70
   2 -10  -1  499.25   49.10
   2 -10  -1  497.45   57.99
  -2  10   1  556.54   69.89
  -2  10   1  573.44   71.29
   1 -10  -1    3.00   16.90
   1 -10  -1   37.90   26.90
  -1  10   1   51.09   33.00
  -1  10   1  -34.30   31.00
   0 -10  -1 1572.34  110.59
   0 -10  -1 1539.25  103.39
   0  10   1 1403.16  116.19
   0  10   1 1610.64  122.59
  -1 -10  -1    6.00   26.20
   1  10   1    6.90   31.60
   1  10   1   15.80   32.50
   1  10   1   25.90   20.90
  -2 -10  -1  789.12   71.99
   2  10   1  771.42   67.99
   2  10   1  602.24   75.99
  -3 -10  -1    9.40   28.70
   3  10   1    7.60   26.80
   3  10   1   21.10   31.80
  -4 -10  -1  158.48   37.30
   4  10   1   48.90   38.90
   4  10   1  147.29   38.80
  -5 -10  -1   99.39   39.10
   5  10   1  188.78   47.20
   6 -11  -1   85.99   38.20
   5 -11  -1  156.58   48.10
   5 -11  -1  181.08   44.20
  -5  11   1  204.88   45.60
   4 -11  -1  400.06   62.69
   4 -11  -1  393.96   54.09
  -4  11   1  466.45   72.69
  -4  11   1  369.86   59.19
   3 -11  -1   45.60   30.80
   3 -11  -1   10.70   39.40
  -3  11   1   46.60   38.40
  -3  11   1  -16.90   38.20
   2 -11  -1  496.45   58.49
  -2  11   1  503.65   72.99
  -2  11   1  511.25   68.39
   1 -11  -1  217.68   44.40
  -1  11   1  195.68   47.50
  -1  11   1  227.58   53.89
   0 -11  -1  179.78   40.80
   0  11   1  149.59   43.30
   0  11   1   62.59   45.60
  -1 -11  -1  118.79   37.70
   1  11   1   90.19   37.80
  -2 -11  -1  114.39   36.10
   2  11   1   70.29   38.10
   2  11   1  112.09   32.70
  -3 -11  -1    2.00   31.20
   3  11   1   -8.40   32.80
   3  11   1  -37.20   25.70
  -4 -11  -1  469.45   63.39
   4  11   1  550.84   71.29
   4  11   1  514.85   63.29
   5 -12  -1  187.08   51.09
   5 -12  -1  128.99   64.69
  -5  12   1  237.18   52.89
  -5  12   1   73.89   75.49
   4 -12  -1   11.50   33.80
   4 -12  -1   20.80   45.10
  -4  12   1  -14.90   45.80
  -4  12   1   45.40   38.10
   3 -12  -1  264.47   45.70
   3 -12  -1  222.28   56.59
  -3  12   1  147.19   56.29
  -3  12   1  336.37   58.79
   2 -12  -1  -19.20   31.80
  -2  12   1   33.50   45.80
  -2  12   1   50.29   42.60
   1 -12  -1  172.38   43.60
  -1  12   1  172.88   52.19
  -1  12   1  131.09   48.90
   0 -12  -1  106.19   39.70
   0  12   1   43.30   42.40
  -1 -12  -1  -28.70   31.60
   1  12   1   39.40   38.90
  -2 -12  -1  337.77   53.19
  -2 -12  -1  281.67   47.60
   2  12   1   90.89   42.30
  -3 -12  -1   85.19   40.10
   3  12   1  118.69   41.70
   3  12   1  120.99   41.20
   3 -13  -1  -21.90   51.89
   2 -13  -1   44.80   39.50
   2 -13  -1  -63.89   48.40
  -2  13   1   50.09   47.80
  -2  13   1    5.10   44.30
   1 -13  -1  223.78   46.70
  -1  13   1   56.99   43.30
   0 -13  -1   -8.80   36.50
   0  13   1  154.98   45.60
   1  13   1  163.58   55.79
   2  13  -2  248.28   56.39
  -2 -13   2  201.88   41.20
  -2 -13   2  348.37   52.29
   1  13  -2   68.19   42.50
  -1 -13   2   58.59   34.40
   0  13  -2   24.70   35.40
   0 -13   2   28.20   29.00
  -1  13  -2   29.40   35.90
   1 -13   2   48.60   31.40
  -2  13  -2  256.27   50.99
   2 -13   2  214.88   41.30
   2 -13   2  205.28   57.79
  -3  13  -2  -20.20   41.50
   3 -13   2  -61.59   44.70
   3 -13   2  -16.20   31.80
   4  12  -2   50.59   41.70
   4  12  -2  -23.50   30.70
  -4 -12   2   23.10   34.40
  -4 -12   2   24.90   34.70
   3  12  -2  236.58   42.90
   3  12  -2  251.67   58.29
  -3 -12   2  342.17   56.69
  -3 -12   2  154.98   40.00
   2  12  -2  193.18   52.69
  -2 -12   2  166.78   39.00
  -2 -12   2  244.68   48.40
   1  12  -2   50.19   37.00
  -1 -12   2   69.99   30.50
  -1 -12   2  103.39   33.40
   0  12  -2  251.67   48.60
   0 -12   2  261.17   44.30
  -1  12  -2   62.89   40.00
   1 -12   2   45.90   28.60
  -2  12  -2  176.68   45.30
   2 -12   2  158.68   36.40
   2 -12   2  156.98   51.59
  -3  12  -2  274.97   47.70
  -3  12  -2  237.18   52.49
   3 -12   2  228.28   41.60
   3 -12   2  202.48   54.39
  -4  12  -2  -14.30   37.90
   4 -12   2  -13.20   29.40
   4 -12   2  -14.90   41.80
  -5  12  -2   52.59   45.00
   5 -12   2   70.19   47.80
   5 -12   2   60.79   35.00
   5  11  -2   22.50   34.30
   5  11  -2    0.60   37.00
  -5 -11   2   55.69   32.10
   4  11  -2   26.10   39.10
   4  11  -2   51.79   32.50
  -4 -11   2   58.89   29.70
  -4 -11   2  109.79   37.10
   3  11  -2  356.96   62.09
   3  11  -2  201.88   40.90
  -3 -11   2  287.77   50.99
  -3 -11   2  212.48   37.50
   2  11  -2   -3.90   29.50
   2  11  -2   30.50   24.50
  -2 -11   2   -9.90   25.50
  -2 -11   2   24.30   25.40
   1  11  -2 1185.78   99.09
  -1 -11   2 1176.08   92.19
  -1 -11   2 1154.38   90.09
   0  11  -2   15.70   32.30
   0 -11   2  -35.40   23.10
   0 -11   2   27.30   22.20
  -1  11  -2  584.84   69.59
   1 -11   2  586.64   60.69
  -2  11  -2  347.27   55.69
  -2  11  -2  412.26   57.29
   2 -11   2  314.57   44.30
  -3  11  -2   -4.60   28.60
  -3  11  -2   14.70   34.30
   3 -11   2   12.10   36.90
   3 -11   2   22.70   28.90
  -4  11  -2  341.57   63.29
  -4  11  -2  343.27   54.59
  -4  11  -2  311.57   55.19
   4 -11   2  325.57   59.79
   4 -11   2  380.56   51.59
  -5  11  -2   -5.90   34.00
  -5  11  -2   -4.80   36.60
   5 -11   2   74.79   47.10
   5 -11   2   16.30   31.50
  -6  11  -2  139.19   45.40
  -6  11  -2  231.08   54.39
   6 -11   2  325.37   67.79
   6  10  -2   33.40   44.50
   6  10  -2   43.80   34.90
  -6 -10   2   65.99   32.10
   5  10  -2  493.05   76.29
   5  10  -2  541.95   66.29
  -5 -10   2  716.43   80.39
  -5 -10   2  530.55   55.89
   4  10  -2    0.70   28.40
   4  10  -2  -38.20   33.20
  -4 -10   2  -17.50   21.70
  -4 -10   2   12.30   28.90
   3  10  -2  514.45   69.29
   3  10  -2  574.34   60.79
  -3 -10   2  568.44   62.39
  -3 -10   2  644.54   57.89
   2  10  -2   23.00   21.30
   2  10  -2   49.60   32.40
  -2 -10   2   16.90   22.80
  -2 -10   2   44.00   28.30
   1  10  -2   48.80   28.80
   1  10  -2   81.79   23.40
  -1 -10   2   88.99   27.70
  -1 -10   2  102.09   25.90
   0  10  -2   51.39   29.10
   0 -10   2   11.20   20.70
   0 -10   2   12.60   18.60
  -1  10  -2   90.29   32.90
  -1  10  -2   90.19   33.70
   1 -10   2   40.50   24.50
   1 -10   2   68.89   23.40
  -2  10  -2   68.49   29.30
  -2  10  -2   30.80   28.80
  -2  10  -2   43.00   33.40
   2 -10   2   50.79   25.80
  -3  10  -2  652.23   68.39
  -3  10  -2  684.73   64.99
  -3  10  -2  750.62   66.69
   3 -10   2  758.12   76.09
   3 -10   2  612.94   62.49
  -4  10  -2   94.99   29.80
  -4  10  -2   90.69   36.80
  -4  10  -2   23.20   32.10
   4 -10   2  114.99   40.20
   4 -10   2   50.99   26.10
  -5  10  -2  701.73   71.19
  -5  10  -2  607.34   74.09
   5 -10   2  670.93   78.19
   5 -10   2  615.94   66.89
  -6  10  -2  118.29   41.10
   6 -10   2   83.39   48.00
  -7  10  -2   19.10   39.40
   7 -10   2   81.19   48.60
   7   9  -2   20.10   36.30
   7   9  -2   49.30   50.29
  -7  -9   2  117.99   41.50
   6   9  -2  600.04   67.39
   6   9  -2  252.37   60.49
  -6  -9   2  444.46   60.59
   5   9  -2  -17.30   27.10
   5   9  -2   49.10   39.00
  -5  -9   2    8.00   23.40
   4   9  -2  955.90   80.09
   4   9  -2  827.42   87.29
  -4  -9   2  883.81   70.69
   3   9  -2   16.10   29.60
   3   9  -2   20.40   22.90
  -3  -9   2   25.70   22.20
   2   9  -2  240.38   41.70
   2   9  -2  257.17   35.50
  -2  -9   2  250.87   39.70
  -2  -9   2  262.37   35.40
   1   9  -2  351.36   47.50
   1   9  -2  384.96   41.50
  -1  -9   2  323.47   35.00
  -1  -9   2  360.66   40.10
  -1  -9   2  392.16   42.10
   0   9  -2   23.60   23.50
   0   9  -2   22.30   25.30
   0   9  -2   26.50   17.40
   0   9  -2   31.50   14.80
   0  -9   2   50.09   15.60
   0  -9   2   62.99   21.80
   0  -9   2   32.10   18.80
  -1   9  -2  761.02   68.89
  -1   9  -2  789.62   64.39
  -1   9  -2  811.52   62.59
  -1   9  -2  697.53   63.99
   1  -9   2  750.72   58.39
   1  -9   2  688.53   59.59
   1  -9   2  778.92   56.19
  -2   9  -2  210.98   33.80
  -2   9  -2  126.39   25.90
  -2   9  -2  133.89   35.20
  -2   9  -2  138.69   31.00
   2  -9   2   92.79   25.40
   2  -9   2  138.19   23.20
  -3   9  -2  256.27   39.90
  -3   9  -2  199.28   35.20
  -3   9  -2  235.98   41.30
   3  -9   2  197.58   34.20
   3  -9   2  214.18   29.60
   3  -9   2  279.57   41.90
  -4   9  -2  152.38   33.10
  -4   9  -2  145.09   34.20
   4  -9   2  121.39   28.90
   4  -9   2  109.49   36.40
  -5   9  -2   12.90   29.90
   5  -9   2   56.29   34.30
   5  -9   2   -0.10   23.60
  -6   9  -2   49.20   34.90
   6  -9   2   28.50   42.20
  -7   9  -2  466.45   67.79
   7  -9   2  471.95   69.69
   7   8  -2   65.29   34.50
   7   8  -2  114.19   53.29
   6   8  -2  337.87   65.69
   6   8  -2  271.47   49.50
   5   8  -2   99.99   39.20
   5   8  -2   87.89   32.50
  -5  -8   2   91.19   26.40
   4   8  -2   -3.50   23.60
   4   8  -2   21.00   31.20
  -4  -8   2   -2.00   18.40
   3   8  -2   -2.30   18.90
   3   8  -2    8.10   22.60
  -3  -8   2    0.50   16.10
   2   8  -2 1092.49   80.79
   2   8  -2 1053.39   84.69
  -2  -8   2 1181.18   78.89
   1   8  -2   43.80   16.90
   1   8  -2   48.40   23.40
  -1  -8   2   48.50   18.60
  -1  -8   2   23.60   18.40
  -1  -8   2   63.99   15.20
   0   8  -2 2045.10  129.09
   0   8  -2 2021.00  132.49
   0   8  -2 1934.31  135.79
   0   8  -2 2058.49  135.99
   0  -8   2 1954.90  125.39
   0  -8   2 2079.59  132.49
   0  -8   2 2152.28  131.69
   0  -8   2 2118.39  128.39
  -1   8  -2   70.59   19.60
  -1   8  -2   81.59   22.80
  -1   8  -2   35.30   20.90
  -1   8  -2   85.39   26.50
   1  -8   2   71.79   18.60
   1  -8   2   78.99   15.80
   1  -8   2   57.69   18.50
  -2   8  -2  967.30   77.89
  -2   8  -2 1106.09   77.69
  -2   8  -2 1093.79   76.09
  -2   8  -2  929.91   78.69
   2  -8   2 1116.39   73.19
   2  -8   2 1072.49   76.89
   2  -8   2 1113.09   72.59
  -3   8  -2  531.75   49.90
  -3   8  -2  567.64   50.59
  -3   8  -2  462.95   45.70
   3  -8   2  569.84   45.90
   3  -8   2  518.15   51.59
   3  -8   2  519.25   47.60
  -4   8  -2  139.29   29.40
  -4   8  -2  118.99   28.40
   4  -8   2   74.49   31.20
   4  -8   2  131.39   20.30
   4  -8   2  124.49   26.50
  -5   8  -2  800.02   67.59
   5  -8   2  775.42   58.19
   5  -8   2  688.73   63.29
   5  -8   2  738.23   76.39
  -6   8  -2   53.19   34.20
   6  -8   2   34.20   21.10
   6  -8   2   19.00   36.20
  -7   8  -2  172.18   43.00
   7  -8   2  196.68   55.09
   7  -8   2  190.28   33.10
  -8   8  -2  111.49   45.50
   8  -8   2   32.10   45.90
   8  -8   2   43.00   29.50
   8   7  -2  -19.20   43.90
   8   7  -2   -5.60   30.60
  -8  -7   2   46.30   35.80
   7   7  -2  338.97   54.19
   7   7  -2  284.67   58.99
   6   7  -2  786.32   71.39
   6   7  -2  480.85   76.69
  -6  -7   2  739.33   60.79
   5   7  -2   93.19   31.10
   5   7  -2   48.50   34.40
  -5  -7   2   96.29   23.90
   4   7  -2 1499.05  102.39
   4   7  -2 1355.46  106.39
  -4  -7   2 1403.46   94.39
  -4  -7   2 1332.47   92.79
   3   7  -2   10.70   16.70
   3   7  -2    9.00   22.90
  -3  -7   2   -2.60   14.60
  -3  -7   2   21.40   14.30
   2   7  -2 1223.08   84.29
   2   7  -2 1172.28   87.59
  -2  -7   2 1251.37   81.79
  -2  -7   2 1208.58   80.39
   1   7  -2   48.60   14.40
   1   7  -2   66.49   21.40
   1   7  -2   58.89   16.60
  -1  -7   2   54.09   12.70
  -1  -7   2   89.69   18.00
  -1  -7   2   39.70    9.20
   0   7  -2  173.78   28.00
   0   7  -2  188.08   26.90
   0   7  -2  148.69   23.60
   0   7  -2  185.38   22.10
   0   7  -2  158.88   28.20
   0  -7   2  184.28   25.60
   0  -7   2  167.98   20.50
   0  -7   2  166.68   18.00
   0  -7   2  165.48   23.70
  -1   7  -2   19.60   18.50
  -1   7  -2   38.10   16.60
  -1   7  -2    2.90   15.90
  -1   7  -2   23.30   15.40
   1  -7   2    8.90   11.70
   1  -7   2   20.60   14.80
   1  -7   2   -4.40    9.60
  -2   7  -2 1210.18   86.09
  -2   7  -2 1342.27   85.69
  -2   7  -2 1309.07   84.49
   2  -7   2 1286.17   81.79
   2  -7   2 1153.28   83.49
   2  -7   2 1206.08   80.89
   2  -7   2 1203.38   77.29
  -3   7  -2  110.79   22.00
  -3   7  -2  145.89   25.50
  -3   7  -2  141.19   24.70
   3  -7   2  109.39   22.10
   3  -7   2  111.49   25.80
   3  -7   2  119.09   16.40
   3  -7   2   84.79   18.70
  -4   7  -2 1410.16   99.49
  -4   7  -2 1470.25  102.49
  -4   7  -2 1433.96   99.29
   4  -7   2 1467.65  104.89
   4  -7   2 1548.65   94.99
   4  -7   2 1473.95  100.59
  -5   7  -2  -28.60   19.50
   5  -7   2  -10.30   26.50
   5  -7   2    5.30   14.40
  -6   7  -2  156.18   34.90
   6  -7   2  181.08   46.40
   6  -7   2  165.18   28.60
  -7   7  -2   71.09   36.60
   7  -7   2   81.09   41.40
   7  -7   2  110.39   28.40
  -8   7  -2   34.70   38.00
   8  -7   2    3.10   25.40
   8  -7   2   25.80   42.20
   8   6  -2   82.99   34.00
   8   6  -2   11.90   42.60
   7   6  -2   75.29   31.60
   7   6  -2   32.30   41.60
   6   6  -2  154.38   49.20
   6   6  -2  303.27   43.70
  -6  -6   2  208.78   32.00
   5   6  -2  523.55   56.89
   5   6  -2  623.04   70.19
  -5  -6   2  465.25   44.20
  -5  -6   2  501.35   44.10
   4   6  -2   35.20   24.60
   4   6  -2   40.10   20.20
  -4  -6   2   53.79   15.50
  -4  -6   2   37.40   16.50
   3   6  -2  620.14   56.39
   3   6  -2  666.63   52.79
  -3  -6   2  648.44   47.40
  -3  -6   2  644.94   48.00
   2   6  -2 1863.61  120.89
   2   6  -2 1771.92  116.69
   2   6  -2 1869.41  111.79
  -2  -6   2 1892.21  113.99
  -2  -6   2 1798.22  114.19
  -2  -6   2 1754.72  112.39
  -2  -6   2 1788.82  109.49
   1   6  -2   57.99   19.30
   1   6  -2   56.39   13.90
   1   6  -2   78.29   15.40
   1   6  -2   58.49    6.40
  -1  -6   2   27.80   10.70
  -1  -6   2   72.79   15.20
  -1  -6   2   71.79   13.00
  -1  -6   2   60.89    9.00
   0   6  -2 3394.26  201.48
   0   6  -2 3527.75  203.58
   0   6  -2 3205.08  204.78
   0   6  -2 3294.37  205.88
   0   6  -2 3316.27  203.78
   0  -6   2 3412.66  202.38
   0  -6   2 3296.67  200.38
   0  -6   2 3284.47  198.58
   0  -6   2 3331.27  203.68
  -1   6  -2   11.90   12.60
  -1   6  -2   25.60   13.60
  -1   6  -2   35.60   15.80
  -1   6  -2   25.20   15.60
   1  -6   2   45.90   12.90
   1  -6   2   26.80    6.20
   1  -6   2   20.10    9.20
   1  -6   2   32.10   12.80
  -2   6  -2  607.64   47.90
  -2   6  -2  606.44   47.00
  -2   6  -2  596.64   46.60
   2  -6   2  619.94   40.70
   2  -6   2  614.54   44.20
   2  -6   2  632.14   44.20
   2  -6   2  584.24   46.70
  -3   6  -2  231.78   30.00
  -3   6  -2  302.57   29.80
  -3   6  -2  292.67   30.70
   3  -6   2  238.88   23.10
   3  -6   2  262.07   33.60
   3  -6   2  266.87   30.80
   3  -6   2  232.08   28.00
   3  -6   2  237.68   26.30
  -4   6  -2   -0.30   16.20
  -4   6  -2   10.30   14.80
  -4   6  -2   -8.70   13.20
   4  -6   2  -18.00   13.40
   4  -6   2   14.60   10.60
   4  -6   2   11.40   19.40
  -5   6  -2   -4.00   17.20
  -5   6  -2   30.80   22.40
   5  -6   2   43.40   30.10
   5  -6   2   -0.30   14.50
  -6   6  -2  711.03   65.49
   6  -6   2  680.33   76.49
   6  -6   2  698.43   56.99
  -7   6  -2   96.59   33.50
   7  -6   2  114.89   28.10
   7  -6   2  102.69   42.20
  -8   6  -2  812.52   78.99
   8  -6   2  868.81   92.59
   8  -6   2  835.62   72.09
  -9   6  -2  -22.90   38.30
   9  -6   2   -7.70   38.60
   9  -6   2   21.50   31.00
   9   5  -2  247.18   44.30
   8   5  -2    3.60   27.00
   8   5  -2  -23.00   40.20
   7   5  -2  811.92   70.79
   7   5  -2  605.74   79.89
   6   5  -2   67.19   23.90
   6   5  -2   32.20   39.60
  -6  -5   2   44.80   19.40
   5   5  -2  197.08   22.20
   5   5  -2  220.08   44.00
   5   5  -2  160.48   29.60
  -5  -5   2  231.68   27.30
  -5  -5   2  194.98   24.90
   4   5  -2  186.48   33.90
   4   5  -2  202.88   28.90
   4   5  -2  207.88   19.40
  -4  -5   2  211.58   24.00
  -4  -5   2  194.58   23.80
  -4  -5   2  158.38   31.00
   3   5  -2  771.92   48.30
   3   5  -2  804.82   61.89
   3   5  -2  761.52   56.69
  -3  -5   2  751.12   52.69
  -3  -5   2  714.63   52.29
  -3  -5   2  754.42   49.30
  -3  -5   2  734.43   53.39
   2   5  -2   61.89   18.70
   2   5  -2   64.19   14.40
   2   5  -2   67.29   11.40
   2   5  -2   73.79    8.40
  -2  -5   2   47.70   12.70
  -2  -5   2   71.99    9.10
  -2  -5   2   74.19   12.90
  -2  -5   2   74.79   13.50
   1   5  -2 3864.01  233.58
   1   5  -2 3725.13  238.78
   1   5  -2 3968.60  241.38
   1   5  -2 3949.60  238.68
  -1  -5   2 3910.41  236.98
  -1  -5   2 4059.89  234.18
  -1  -5   2 4248.08  237.48
  -1  -5   2 4111.89  237.58
   0   5  -2   69.09   11.80
   0   5  -2   82.79   15.10
   0   5  -2   88.19   17.50
   0   5  -2   77.09   16.60
   0   5  -2   88.19   15.50
   0  -5   2   60.59   11.20
   0  -5   2   81.19    6.20
   0  -5   2   65.79   14.20
   0  -5   2   84.99   10.10
   0  -5   2   80.09   12.90
   0  -5   2   65.09   11.00
  -1   5  -2 2752.62  167.48
  -1   5  -2 2706.03  169.58
  -1   5  -2 2802.22  171.58
  -1   5  -2 2798.42  169.18
  -1   5  -2 2937.21  171.28
   1  -5   2 2820.42  169.48
   1  -5   2 2772.32  167.68
   1  -5   2 2825.32  169.38
   1  -5   2 2626.74  168.18
   1  -5   2 2869.41  165.08
  -2   5  -2 1583.84   98.19
  -2   5  -2 1562.94   97.59
  -2   5  -2 1528.35   98.29
   2  -5   2 1501.55   99.09
   2  -5   2 1473.55   95.49
   2  -5   2 1611.44   96.99
   2  -5   2 1510.25   93.69
   2  -5   2 1511.05   97.59
  -3   5  -2  121.89   18.70
  -3   5  -2   91.09   16.80
  -3   5  -2  136.99   21.10
   3  -5   2   86.19   17.30
   3  -5   2  106.99   21.70
   3  -5   2  115.39   15.00
   3  -5   2   79.09   17.20
   3  -5   2   81.99   17.20
  -4   5  -2 2115.49  132.99
  -4   5  -2 2043.10  130.89
  -4   5  -2 2149.58  135.29
   4  -5   2 2057.69  129.89
   4  -5   2 2148.09  138.19
  -5   5  -2   50.39   18.20
  -5   5  -2   67.69   22.80
   5  -5   2   32.20   14.40
   5  -5   2   27.00   26.50
  -6   5  -2  787.62   65.39
   6  -5   2  721.03   58.89
   6  -5   2  780.52   77.99
  -7   5  -2   12.60   27.90
   7  -5   2   25.80   38.30
   7  -5   2    2.10   20.00
  -8   5  -2  172.58   41.60
   8  -5   2  150.68   47.30
   8  -5   2   83.09   27.30
  -9   5  -2   -6.70   35.00
   9  -5   2   48.10   42.00
   9  -5   2   15.10   28.80
   9   4  -2    8.50   25.90
   8   4  -2  324.37   47.70
   8   4  -2  237.18   55.19
   7   4  -2  190.98   50.29
   7   4  -2  168.48   26.50
   7   4  -2  181.48   33.60
   7   4  -2  240.18   29.30
  -7  -4   2  154.18   27.70
   6   4  -2   76.49   17.80
   6   4  -2   69.99   17.00
   6   4  -2   71.69   22.30
   6   4  -2   57.29   22.90
   6   4  -2  101.39   38.40
  -6  -4   2   33.90   17.50
  -6  -4   2   83.29   17.20
   5   4  -2 1603.84   99.59
   5   4  -2 1553.94  115.59
   5   4  -2 1543.35   98.49
   5   4  -2 1467.15  105.59
  -5  -4   2 1519.75  101.19
  -5  -4   2 1735.73  100.99
  -5  -4   2 1544.95  101.99
   4   4  -2  111.09   29.40
   4   4  -2  141.19   15.00
   4   4  -2  104.79   20.60
   4   4  -2  113.09   14.80
  -4  -4   2   72.79   16.40
  -4  -4   2   95.29   15.50
  -4  -4   2  112.89   17.40
   3   4  -2 4560.54  269.97
   3   4  -2 4299.07  266.07
   3   4  -2 4598.24  260.97
   3   4  -2 4555.44  259.87
  -3  -4   2 4420.66  262.57
  -3  -4   2 3996.60  261.57
  -3  -4   2 4457.15  262.57
   2   4  -2   49.00    9.40
   2   4  -2   31.70   10.50
   2   4  -2   45.60    7.10
   2   4  -2   45.60   14.40
  -2  -4   2   42.60    9.20
  -2  -4   2   54.99   10.10
  -2  -4   2   44.80    6.80
  -2  -4   2   27.40   11.00
   1   4  -2 2730.83  167.78
   1   4  -2 2886.21  166.08
   1   4  -2 2447.76  169.68
   1   4  -2 2763.52  169.58
   1   4  -2 2811.22  171.58
  -1  -4   2 3047.90  169.48
  -1  -4   2 2902.01  168.18
  -1  -4   2 2886.51  165.28
  -1  -4   2 2801.72  168.18
   0   4  -2   70.79   13.80
   0   4  -2  109.99   16.30
   0   4  -2   60.09   12.00
   0   4  -2   70.99   10.60
   0   4  -2   68.69    9.50
   0   4  -2   77.59   13.70
   0  -4   2   63.59   12.10
   0  -4   2   52.39    9.90
   0  -4   2   74.59   11.50
   0  -4   2   69.89    5.50
   0  -4   2   60.09   10.00
  -1   4  -2  241.18   21.70
  -1   4  -2  207.68   21.10
  -1   4  -2  226.88   21.50
  -1   4  -2  235.88   18.30
   1  -4   2  230.68   16.30
   1  -4   2  231.38   20.10
   1  -4   2  202.68   19.60
   1  -4   2  233.18   19.40
   1  -4   2  216.38   19.30
  -2   4  -2  378.46   30.30
  -2   4  -2  405.06   31.70
  -2   4  -2  412.06   28.60
  -2   4  -2  376.66   30.60
   2  -4   2  412.76   41.70
   2  -4   2  354.76   30.00
   2  -4   2  378.06   31.00
   2  -4   2  418.36   32.80
   2  -4   2  408.66   31.90
   2  -4   2  390.06   27.40
  -3   4  -2 1740.53  110.79
  -3   4  -2 1753.72  111.39
  -3   4  -2 1859.61  115.19
  -3   4  -2 1788.22  113.49
   3  -4   2 1705.03  110.49
   3  -4   2 1794.32  113.79
   3  -4   2 1915.71  112.09
   3  -4   2 1900.01  116.89
  -4   4  -2   93.09   18.70
  -4   4  -2   82.69   15.80
  -4   4  -2   76.09   19.40
   4  -4   2  102.79   26.20
   4  -4   2   79.89   14.30
  -5   4  -2 1178.78   84.29
  -5   4  -2 1231.98   81.89
   5  -4   2 1127.39   78.89
   5  -4   2 1152.18   89.69
  -6   4  -2   85.49   23.20
  -6   4  -2  158.78   31.20
   6  -4   2  114.09   22.20
   6  -4   2   86.19   33.10
  -7   4  -2  212.28   39.20
   7  -4   2  176.38   30.40
   7  -4   2  216.58   47.90
  -8   4  -2  320.67   49.10
   8  -4   2  264.57   52.19
   8  -4   2  311.27   42.20
  -9   4  -2  -25.50   33.80
   9  -4   2  -82.29   39.60
   9  -4   2  -13.80   26.70
   8   3  -2   58.59   40.80
   8   3  -2   44.90   22.50
   8   3  -2   76.39   25.50
   8   3  -2  112.89   29.50
   8   3  -2   83.79   30.60
   7   3  -2  527.85   44.90
   7   3  -2  570.84   52.79
   7   3  -2  306.87   57.89
   7   3  -2  483.15   46.10
   7   3  -2  541.45   51.29
   6   3  -2  804.02   57.29
   6   3  -2  722.03   60.09
   6   3  -2  747.13   54.99
   6   3  -2  774.22   62.79
   6   3  -2  670.63   74.19
  -6  -3   2  797.02   55.29
  -6  -3   2  791.12   55.99
   5   3  -2  541.85   41.00
   5   3  -2  571.14   46.30
   5   3  -2  585.94   59.69
   5   3  -2  551.34   47.10
   5   3  -2  591.64   43.00
  -5  -3   2  574.04   41.90
   4   3  -2 2352.36  147.09
   4   3  -2 2275.27  134.69
   4   3  -2 2177.68  135.69
   4   3  -2 2094.59  139.39
   4   3  -2 2279.37  138.19
  -4  -3   2 2189.48  135.39
   3   3  -2  104.99   11.60
   3   3  -2  152.68   24.00
   3   3  -2   98.89   12.50
   3   3  -2  128.89   17.50
  -3  -3   2  146.89   14.90
  -3  -3   2  108.29   13.70
   2   3  -2  221.68   20.90
   2   3  -2  238.88   15.90
   2   3  -2  229.18   17.60
   2   3  -2  238.48   26.00
   2   3  -2  263.47   19.10
  -2  -3   2  218.28   18.20
  -2  -3   2  222.58   19.20
  -2  -3   2  230.38   17.80
   1   3  -2 1307.17   79.79
   1   3  -2 1230.48   81.99
   1   3  -2 1346.57   80.69
   1   3  -2 1267.17   83.19
   1   3  -2 1351.76   83.49
  -1  -3   2 1377.96   83.29
  -1  -3   2 1333.27   80.29
  -1  -3   2 1379.66   80.99
  -1  -3   2 1334.37   77.89
   0   3  -2   94.19   12.70
   0   3  -2   87.49   12.90
   0   3  -2   97.49   13.50
   0   3  -2  112.09   14.00
   0   3  -2  115.69   12.10
   0   3  -2   63.39    9.20
   0  -3   2  105.39   13.90
   0  -3   2   94.59   10.80
   0  -3   2   82.39    9.90
   0  -3   2   95.89   12.60
  -1   3  -2 3130.79  180.28
  -1   3  -2 3009.00  181.78
  -1   3  -2 3029.30  181.28
  -1   3  -2 3173.68  181.18
   1  -3   2 2809.42  180.18
   1  -3   2 3166.68  179.18
   1  -3   2 2931.61  180.98
   1  -3   2 3043.90  181.58
   1  -3   2 3031.90  180.88
  -2   3  -2   40.40    9.70
  -2   3  -2   33.70    8.40
  -2   3  -2   24.10    7.50
  -2   3  -2   36.00   10.50
   2  -3   2   24.70    9.10
   2  -3   2   24.30    7.80
   2  -3   2   24.90   11.40
   2  -3   2   40.10   12.80
   2  -3   2   40.60    5.90
   2  -3   2   34.00    9.70
   2  -3   2   38.80    7.90
  -3   3  -2 2766.12  164.48
  -3   3  -2 2637.34  161.38
  -3   3  -2 2657.03  162.58
  -3   3  -2 2722.33  160.18
   3  -3   2 2589.34  165.88
   3  -3   2 2531.85  160.78
   3  -3   2 2717.63  161.58
   3  -3   2 2736.53  157.68
  -4   3  -2   82.89   16.10
  -4   3  -2  102.49   14.90
  -4   3  -2   57.89   18.60
   4  -3   2   81.29   15.70
   4  -3   2   94.89   10.10
   4  -3   2  113.19   24.80
  -5   3  -2   45.10   18.50
  -5   3  -2   37.10   15.00
   5  -3   2   17.70   13.90
   5  -3   2   45.20   25.60
  -6   3  -2   33.80   22.00
  -6   3  -2   17.80   15.70
   6  -3   2  -17.90   27.10
   6  -3   2   -2.50   15.00
  -7   3  -2  857.01   74.89
   7  -3   2 1024.10   89.09
   7  -3   2  890.81   70.49
  -8   3  -2   -4.50   27.00
   8  -3   2  -10.90   22.80
   8  -3   2   18.20   37.80
  -9   3  -2  466.15   61.79
   9  -3   2  351.36   48.80
   9  -3   2  306.37   59.29
   9   2  -2  -28.20   22.60
   9   2  -2   27.30   29.10
   9   2  -2   -7.00   23.00
   8   2  -2  829.22   85.89
   8   2  -2  784.22   65.09
   8   2  -2  926.81   69.09
   8   2  -2  702.83   68.29
   8   2  -2  860.71   69.09
   7   2  -2   54.29   22.20
   7   2  -2   55.39   19.90
   7   2  -2   99.39   36.00
   7   2  -2   61.39   23.20
   7   2  -2   58.09   21.80
  -7  -2   2   53.29   18.10
   6   2  -2  418.56   41.60
   6   2  -2  366.66   52.99
   6   2  -2  400.46   40.20
   6   2  -2  451.15   39.20
   6   2  -2  404.26   36.70
  -6  -2   2  436.96   35.20
  -6  -2   2  511.65   38.70
   5   2  -2    4.20   21.60
   5   2  -2   -5.70   12.20
   5   2  -2    5.60   10.00
   5   2  -2    2.40   11.20
   5   2  -2    5.80   12.60
  -5  -2   2   -2.20   10.10
  -5  -2   2    3.10    8.50
   4   2  -2  134.69   19.20
   4   2  -2  122.49   15.80
   4   2  -2  111.79   16.80
   4   2  -2  126.69   27.60
   4   2  -2  120.79   14.30
  -4  -2   2   70.19   11.80
   3   2  -2  763.72   48.20
   3   2  -2  656.63   50.89
   3   2  -2  785.12   56.79
   3   2  -2  769.52   49.70
   3   2  -2  773.22   49.40
  -3  -2   2  809.52   48.70
   2   2  -2  730.23   52.99
   2   2  -2  786.62   51.19
   2   2  -2  796.82   47.60
   2   2  -2  806.02   49.00
   2   2  -2  749.33   48.50
  -2  -2   2  795.42   48.20
  -2  -2   2  757.22   48.60
   1   2  -2 3448.56  211.98
   1   2  -2 3647.54  213.88
   1   2  -2 3700.63  212.28
   1   2  -2 3912.81  214.68
   1   2  -2 3690.03  214.58
   1   2  -2 3730.33  210.38
  -1  -2   2 3513.25  214.08
  -1  -2   2 3528.15  211.28
  -1  -2   2 3204.48  214.18
  -1  -2   2 3637.24  212.18
   0   2  -2 6394.46  379.16
   0   2  -2 6583.54  380.26
   0   2  -2 6642.64  379.76
   0   2  -2 6217.08  378.06
   0  -2   2 6058.49  379.46
   0  -2   2 6649.73  377.96
   0  -2   2 6923.91  379.76
   0  -2   2 6242.88  378.16
  -1   2  -2  626.44   38.70
  -1   2  -2  648.14   40.10
  -1   2  -2  639.04   40.70
  -1   2  -2  560.64   40.30
   1  -2   2  620.84   41.20
   1  -2   2  594.64   38.60
   1  -2   2  597.44   40.60
   1  -2   2  586.54   39.60
   1  -2   2  598.04   40.20
   1  -2   2  649.54   42.50
   1  -2   2  667.23   37.90
  -2   2  -2 1713.73  106.09
  -2   2  -2 1755.42  106.29
  -2   2  -2 1752.02  103.49
  -2   2  -2 1837.22  107.39
   2  -2   2 1764.92  103.99
   2  -2   2 1728.73  108.49
   2  -2   2 1690.13  104.89
   2  -2   2 1700.73  105.59
   2  -2   2 1693.03  107.49
  -3   2  -2 4623.34  287.17
  -3   2  -2 4904.91  283.17
  -3   2  -2 4367.16  285.87
  -3   2  -2 5078.89  286.47
   3  -2   2 4979.40  291.27
   3  -2   2 4645.74  285.37
   3  -2   2 4826.52  285.87
   3  -2   2 4962.10  283.77
   3  -2   2 4931.11  286.07
  -4   2  -2  420.26   36.70
  -4   2  -2  451.85   35.50
  -4   2  -2  427.76   30.70
   4  -2   2  434.56   33.50
   4  -2   2  422.96   30.50
   4  -2   2  413.56   45.10
  -5   2  -2 2445.76  147.19
  -5   2  -2 2543.45  149.99
   5  -2   2 2300.17  143.09
   5  -2   2 2310.47  155.78
   5  -2   2 2175.28  146.09
  -6   2  -2    8.60   18.20
  -6   2  -2   -0.50   13.20
   6  -2   2  -18.80   25.70
   6  -2   2   -3.90   15.20
  -7   2  -2  597.84   56.69
   7  -2   2  516.45   65.09
   7  -2   2  619.24   52.19
  -8   2  -2   59.89   29.00
   8  -2   2   42.50   24.80
   8  -2   2  -10.80   36.00
  -9   2  -2   -5.60   29.00
   9  -2   2  -32.10   40.10
   9  -2   2   14.00   27.10
  10   1  -2   68.69   31.80
   9   1  -2   83.29   37.10
   9   1  -2  182.78   34.20
   9   1  -2  144.69   31.00
  -9  -1   2  205.08   36.40
   8   1  -2    4.60   21.90
   8   1  -2   -4.70   19.70
   8   1  -2   28.90   20.90
   7   1  -2  194.48   29.30
   7   1  -2  204.48   31.20
   7   1  -2  206.18   43.90
   7   1  -2  254.17   31.60
   7   1  -2  164.58   26.70
  -7  -1   2  201.68   45.60
  -7  -1   2  171.48   27.80
  -7  -1   2  315.07   32.90
   6   1  -2 1183.08   85.79
   6   1  -2 1260.07   85.59
   6   1  -2 1271.57   86.59
   6   1  -2 1195.58   96.39
   6   1  -2 1266.87   84.39
  -6  -1   2 1315.77   85.49
  -6  -1   2 1308.17   80.89
   5   1  -2   23.40   14.00
   5   1  -2   41.80   13.30
   5   1  -2   35.50   13.70
   5   1  -2   56.99   24.80
   5   1  -2   45.70   13.50
  -5  -1   2   61.99   13.40
  -5  -1   2   35.90    9.10
   4   1  -2 4069.99  236.78
   4   1  -2 3892.11  235.68
   4   1  -2 3984.10  236.68
   4   1  -2 3659.73  244.28
   4   1  -2 3986.70  238.08
  -4  -1   2 4079.79  234.08
   3   1  -2    2.60    6.60
   3   1  -2   12.00    6.30
   3   1  -2    8.40    7.40
   3   1  -2    2.50    6.10
   3   1  -2   18.00   13.20
  -3  -1   2    4.70    4.70
   2   1  -2 2234.48  132.49
   2   1  -2 2214.88  134.59
   2   1  -2 2180.58  131.89
   2   1  -2 2278.47  137.59
   2   1  -2 2269.27  132.39
   2   1  -2 2230.38  133.29
  -2  -1   2 2215.48  131.89
   1   1  -2 1810.82  110.69
   1   1  -2 1817.02  107.19
   1   1  -2 1800.52  107.79
   1   1  -2 1851.21  108.99
   1   1  -2 1894.61  110.29
   1   1  -2 1814.72  107.99
  -1  -1   2 1796.82  106.89
  -1  -1   2 1848.32  108.09
  -1  -1   2 1827.02  110.09
   0   1  -2  741.93   43.70
   0   1  -2  715.73   45.30
   0   1  -2  682.63   43.40
   0   1  -2  716.93   45.90
   0  -1   2  677.43   45.10
   0  -1   2  696.93   43.60
   0  -1   2  695.13   43.40
   0  -1   2  725.83   45.80
   0  -1   2  712.73   43.50
  -1   1  -2 3758.02  239.98
  -1   1  -2 4084.29  239.38
  -1   1  -2 3997.90  239.88
   1  -1   2 4114.69  238.98
   1  -1   2 3536.65  241.68
   1  -1   2 4353.86  239.58
   1  -1   2 4432.76  241.28
   1  -1   2 4246.48  238.88
  -2   1  -2  621.34   38.70
  -2   1  -2  648.94   42.50
  -2   1  -2  616.54   41.50
   2  -1   2  643.84   41.70
   2  -1   2  710.13   44.00
   2  -1   2  619.24   41.30
   2  -1   2  634.84   41.30
   2  -1   2  618.64   46.10
  -3   1  -2 1431.36   87.99
  -3   1  -2 1334.97   83.49
  -3   1  -2 1454.75   86.69
   3  -1   2 1345.47   85.89
   3  -1   2 1419.66   92.59
   3  -1   2 1359.46   86.59
   3  -1   2 1418.16   86.09
  -4   1  -2 2408.76  143.79
  -4   1  -2 2288.27  145.09
  -4   1  -2 2334.97  141.19
   4  -1   2 2336.77  144.39
   4  -1   2 2376.16  151.28
   4  -1   2 2368.86  143.39
  -5   1  -2   22.40   15.10
  -5   1  -2   43.30   13.70
   5  -1   2   18.00   23.60
   5  -1   2   20.40   10.90
   5  -1   2   37.40   15.00
  -6   1  -2  329.17   37.40
  -6   1  -2  316.77   32.40
   6  -1   2  279.37   29.40
   6  -1   2  298.47   43.70
   6  -1   2  263.97   32.20
  -7   1  -2  647.64   58.29
  -7   1  -2  654.03   54.49
   7  -1   2  669.83   55.59
   7  -1   2  591.34   72.19
  -8   1  -2   39.20   26.50
   8  -1   2   19.10   24.10
   8  -1   2    7.70   33.70
  -9   1  -2  548.55   61.89
   9  -1   2  398.36   51.99
   9  -1   2  340.57   61.49
  10   0  -2   59.69   27.50
 -10   0   2   92.99   35.80
   9   0  -2   48.60   24.50
   9   0  -2   72.19   28.70
  -9   0   2   81.39   29.70
   8   0  -2  235.38   34.40
   8   0  -2  232.48   35.30
   8   0  -2  273.37   39.40
   7   0  -2  138.79   27.00
   7   0  -2  170.78   29.60
   7   0  -2  158.68   27.30
  -7   0   2  166.78   26.80
  -7   0   2  140.59   40.00
   6   0  -2  965.90   76.09
   6   0  -2  806.42   64.79
   6   0  -2  909.11   65.59
   6   0  -2  949.31   64.19
   6   0  -2  900.61   64.39
  -6   0   2  754.42   76.69
  -6   0   2  910.91   63.29
  -6   0   2  926.31   65.79
  -6   0   2  949.90   59.19
   5   0  -2  189.68   23.60
   5   0  -2  219.78   24.80
   5   0  -2  235.08   25.20
   5   0  -2  178.28   23.50
   5   0  -2  273.07   38.50
  -5   0   2  184.28   23.00
  -5   0   2  215.78   19.10
  -5   0   2  263.07   26.00
   4   0  -2  100.89   14.50
   4   0  -2  127.49   16.50
   4   0  -2  124.89   16.10
   4   0  -2   96.09   14.80
   4   0  -2  135.99   25.00
  -4   0   2   93.89   14.90
  -4   0   2  115.79   11.20
   3   0  -2   59.99   10.00
   3   0  -2   44.50    9.00
   3   0  -2   42.10    8.70
   3   0  -2   56.69   16.50
   3   0  -2   53.69    9.80
  -3   0   2   53.79   10.20
  -3   0   2   52.79    6.30
   2   0  -2 2634.24  170.98
   2   0  -2 2893.61  166.08
   2   0  -2 2807.62  167.48
   2   0  -2 2809.52  166.88
  -2   0   2 2790.52  167.58
  -2   0   2 2847.42  164.98
  -2   0   2 2898.91  167.18
   1   0  -2   49.90    6.30
   1   0  -2   58.19   11.40
   1   0  -2   45.70    6.40
   1   0  -2   45.20    4.60
   1   0  -2   57.49    7.30
  -1   0   2   65.59    9.00
  -1   0   2   52.59    4.90
  -1   0   2   65.39    9.90
   0   0  -2 9573.64  556.74
   0   0  -2 9532.95  556.44
   0   0  -2 9487.75  555.14
   0   0   2 9752.62  555.34
   0   0   2 9460.85  558.14
   0   0   2 9351.96  556.94
   0   0   2 9407.76  556.04
   0   0   2 9555.04  556.64
  -1   0  -2   12.50    4.60
  -1   0  -2    4.40    5.10
   1   0   2    4.10    8.20
   1   0   2    0.10    1.80
   1   0   2    2.90    6.00
   1   0   2    7.30    5.60
   1   0   2    6.50    4.20
   1   0   2   10.70    8.60
  -2   0  -2 3610.44  221.28
  -2   0  -2 3956.00  220.58
   2   0   2 3798.42  223.18
   2   0   2 3804.72  219.98
   2   0   2 3628.24  221.28
   2   0   2 3560.44  224.48
   2   0   2 3686.03  222.08
   2   0   2 3768.82  220.38
   2   0   2 3795.22  220.38
  -3   0  -2    9.70    6.70
  -3   0  -2   14.60    7.30
   3   0   2    4.90    5.40
   3   0   2   30.30    8.70
   3   0   2   -3.30   11.80
   3   0   2   14.70    8.00
   3   0   2    5.00    7.40
  -4   0  -2    5.70    8.40
  -4   0  -2   -2.00    9.40
   4   0   2    8.40    9.80
   4   0   2   16.20    9.80
   4   0   2   13.80   16.30
  -5   0  -2  306.17   27.60
  -5   0  -2  314.67   30.00
   5   0   2  242.28   28.50
   5   0   2  310.47   29.90
   5   0   2  265.77   38.80
  -6   0  -2  565.44   47.10
  -6   0  -2  557.94   44.70
   6   0   2  546.45   45.40
   6   0   2  565.34   46.90
   6   0   2  490.45   58.09
  -7   0  -2  133.99   28.00
   7   0   2   75.69   36.50
   7   0   2  155.58   25.20
   7   0   2  131.39   27.60
  -8   0  -2  743.13   64.69
   8   0   2  661.03   62.59
   8   0   2  625.14   77.09
   9   0   2   18.90   42.90
  10  -1  -2   31.80   28.10
 -10   1   2  141.29   36.80
   9  -1  -2  473.25   50.89
   9  -1  -2  343.67   46.50
  -9   1   2  351.86   50.19
   8  -1  -2   33.50   21.70
   8  -1  -2    3.10   21.40
   8  -1  -2   -3.60   22.30
   7  -1  -2 1044.50   77.59
   7  -1  -2 1151.38   78.79
   7  -1  -2  989.60   76.19
  -7   1   2 1044.90   88.19
   6  -1  -2  165.18   24.70
   6  -1  -2  152.78   24.90
   6  -1  -2  231.18   29.30
  -6   1   2  176.98   25.40
  -6   1   2  222.38   40.50
  -6   1   2  249.78   26.80
   5  -1  -2  744.03   54.29
   5  -1  -2  721.13   52.89
   5  -1  -2  691.23   53.39
  -5   1   2  732.93   54.59
  -5   1   2  779.82   47.80
  -5   1   2  787.22   52.49
  -5   1   2  556.74   62.49
  -5   1   2  850.61   50.39
   4  -1  -2  314.17   27.70
   4  -1  -2  336.97   27.10
   4  -1  -2  275.27   35.60
   4  -1  -2  352.66   28.70
  -4   1   2  354.26   41.20
  -4   1   2  341.77   22.60
  -4   1   2  334.37   27.90
  -4   1   2  327.37   24.30
  -4   1   2  346.27   27.20
   3  -1  -2 1318.07   80.09
   3  -1  -2 1320.77   79.99
   3  -1  -2 1292.27   79.29
   3  -1  -2 1203.98   84.29
  -3   1   2 1303.87   75.59
  -3   1   2 1133.99   85.89
  -3   1   2 1216.58   79.79
  -3   1   2 1290.17   77.19
  -3   1   2 1343.17   79.89
   2  -1  -2 1096.89   67.99
   2  -1  -2 1119.09   67.79
   2  -1  -2 1053.99   71.49
   2  -1  -2 1118.79   66.99
   2  -1  -2 1059.79   67.39
   2  -1  -2 1129.79   67.99
  -2   1   2 1153.68   66.59
  -2   1   2 1117.39   69.49
  -2   1   2  988.30   73.39
   1  -1  -2 7661.73  421.46
   1  -1  -2 7527.65  422.26
   1  -1  -2 7385.36  422.56
   1  -1  -2 7461.85  422.06
  -1   1   2 7050.49  424.36
  -1   1   2 6484.65  422.66
  -1   1   2 6914.01  425.26
   0  -1  -2   26.10    8.50
   0  -1  -2   40.80    7.20
   0  -1  -2   47.70    6.60
   0   1   2   44.90    9.20
   0   1   2   55.59   10.20
   0   1   2   44.20    9.90
   0   1   2   45.50    9.60
   0   1   2   45.20    6.90
  -1  -1  -2  428.46   26.00
  -1  -1  -2  432.36   27.00
  -1  -1  -2  438.36   31.40
   1   1   2  422.56   25.70
   1   1   2  399.36   29.90
   1   1   2  394.76   29.50
   1   1   2  404.56   28.00
   1   1   2  432.46   27.00
   1   1   2  414.76   30.50
   1   1   2  390.16   28.50
  -2  -1  -2 1253.37   75.59
  -2  -1  -2 1277.17   76.49
   2   1   2 1259.07   77.79
   2   1   2 1250.87   75.39
   2   1   2 1298.87   77.29
   2   1   2 1241.98   79.39
   2   1   2 1208.88   80.69
  -3  -1  -2  179.28   16.60
  -3  -1  -2  182.28   17.70
   3   1   2  207.18   21.20
   3   1   2  220.98   20.90
   3   1   2  224.58   21.00
   3   1   2  240.28   26.80
  -4  -1  -2 2446.76  142.39
  -4  -1  -2 2328.77  143.49
   4   1   2 2102.49  149.09
   4   1   2 2524.35  145.79
   4   1   2 2376.36  144.99
   4   1   2 2292.37  146.39
  -5  -1  -2   51.29   14.50
  -5  -1  -2   14.30   10.00
   5   1   2   48.10   16.90
   5   1   2   33.00   14.80
   5   1   2   57.99   17.50
   5   1   2   32.70   21.70
  -6  -1  -2 1865.01  118.09
  -6  -1  -2 1839.82  116.09
   6   1   2 1696.43  118.09
   6   1   2 1719.43  126.79
   6   1   2 1942.71  120.79
  -7  -1  -2    4.90   17.80
   7   1   2   12.90   20.40
   7   1   2  -21.90   30.40
   7   1   2    8.90   18.00
   8   1   2  225.68   48.40
  -9  -1  -2  159.58   37.80
   9   1   2   47.90   46.80
  10  -2  -2   87.49   32.00
 -10   2   2  145.39   42.70
   9  -2  -2  150.58   32.00
   9  -2  -2  149.99   38.20
  -9   2   2  197.78   39.00
   8  -2  -2  226.98   36.90
   8  -2  -2  328.27   41.30
   8  -2  -2  279.97   36.70
   7  -2  -2  141.29   27.50
   7  -2  -2  209.68   31.40
   7  -2  -2  166.58   29.70
  -7   2   2  155.88   37.20
   6  -2  -2   22.20   16.40
   6  -2  -2   -1.80   13.20
   6  -2  -2    5.30   15.80
  -6   2   2    5.20   25.00
  -6   2   2   -3.20   13.90
   5  -2  -2 2552.74  160.08
   5  -2  -2 2726.93  162.18
   5  -2  -2 2518.35  159.58
  -5   2   2 2696.83  153.28
  -5   2   2 2527.85  167.38
  -5   2   2 2457.15  158.98
  -5   2   2 2589.14  160.38
   4  -2  -2   18.30   12.90
   4  -2  -2   24.80   10.30
   4  -2  -2   14.60   11.10
  -4   2   2   19.80    4.60
  -4   2   2   15.50   20.00
  -4   2   2   33.10   13.80
  -4   2   2   19.20   10.60
   3  -2  -2 4884.91  281.67
   3  -2  -2 4467.45  281.97
   3  -2  -2 4635.54  281.17
   3  -2  -2 4831.02  282.07
   3  -2  -2 4962.60  281.37
  -3   2   2 4760.22  287.07
  -3   2   2 4811.82  281.77
  -3   2   2 5010.90  276.57
  -3   2   2 4286.97  282.07
   2  -2  -2  295.57   22.00
   2  -2  -2  278.57   21.20
   2  -2  -2  238.28   20.60
   2  -2  -2  269.57   20.40
   2  -2  -2  268.67   20.60
  -2   2   2  249.18   25.00
  -2   2   2  270.97   17.40
  -2   2   2  241.88   20.70
  -2   2   2  260.07   27.40
   1  -2  -2 5415.06  320.37
   1  -2  -2 5313.97  320.97
   1  -2  -2 5272.77  320.17
   1  -2  -2 5434.56  318.17
   1  -2  -2 5355.46  319.57
  -1   2   2 5424.76  319.67
  -1   2   2 5748.52  321.97
  -1   2   2 5587.24  323.97
  -1   2   2 5524.65  321.27
   0  -2  -2   11.20    6.60
   0  -2  -2    9.60    8.10
   0  -2  -2   17.30    4.80
   0   2   2   10.40    8.30
   0   2   2   13.70    9.90
   0   2   2   15.10    7.60
   0   2   2   13.10    3.30
  -1  -2  -2   52.69   12.80
  -1  -2  -2   68.39    6.60
   1   2   2   73.29   11.40
   1   2   2   45.40   10.70
   1   2   2   87.49   12.90
   1   2   2   75.49   12.50
   1   2   2   78.19   12.20
  -2  -2  -2 1599.64   93.59
  -2  -2  -2 1562.74   94.49
  -2  -2  -2 1656.73  100.49
   2   2   2 1573.84  100.19
   2   2   2 1563.54   99.59
   2   2   2 1476.15   97.39
   2   2   2 1674.43   98.19
  -3  -2  -2 1131.19   76.19
  -3  -2  -2 1265.07   75.39
  -3  -2  -2 1316.67   82.29
   3   2   2 1374.16   80.79
   3   2   2 1235.28   81.59
   3   2   2 1177.98   83.19
  -4  -2  -2  736.43   47.10
  -4  -2  -2  702.03   48.30
   4   2   2  699.63   54.09
   4   2   2  758.42   53.89
   4   2   2  713.63   59.09
  -5  -2  -2  242.88   24.40
  -5  -2  -2  272.27   26.30
   5   2   2  312.77   34.80
   5   2   2  259.17   37.70
   5   2   2  367.96   36.20
  -6  -2  -2  111.29   21.00
   6   2   2   93.19   30.90
   6   2   2  118.59   32.50
   6   2   2  137.19   27.00
  -7  -2  -2  105.49   30.40
   7   2   2   62.49   26.20
   7   2   2   60.19   34.80
  -8  -2  -2  364.86   50.29
   8   2   2  418.56   49.50
   8   2   2  438.26   63.59
  -9  -2  -2   22.60   33.20
   9   2   2   17.00   44.90
  10  -3  -2  226.68   61.39
 -10   3   2  165.98   59.89
   9  -3  -2  381.06   51.19
   9  -3  -2  341.47   44.00
  -9   3   2  296.57   48.90
   8  -3  -2   86.59   25.50
   8  -3  -2   80.19   29.20
   8  -3  -2  104.29   29.90
  -8   3   2  104.99   31.30
   7  -3  -2 1364.76   95.09
   7  -3  -2 1255.37   94.89
   7  -3  -2 1479.15   97.99
  -7   3   2 1337.87  104.69
   6  -3  -2  209.58   28.70
   6  -3  -2  184.78   26.70
   6  -3  -2  213.68   31.40
  -6   3   2  252.07   39.40
  -6   3   2  154.78   25.80
   5  -3  -2  635.34   49.10
   5  -3  -2  670.63   53.79
   5  -3  -2  721.83   49.99
  -5   3   2  633.34   50.49
  -5   3   2  583.04   51.09
  -5   3   2  696.53   58.99
   4  -3  -2 1402.96  101.49
   4  -3  -2 1519.65   99.19
   4  -3  -2 1653.23  100.59
   4  -3  -2 1591.64   99.59
  -4   3   2 1619.94   92.59
  -4   3   2 1662.13  106.99
  -4   3   2 1493.85   98.89
  -4   3   2 1587.34  100.29
   3  -3  -2  130.99   16.10
   3  -3  -2  105.79   15.10
   3  -3  -2  119.29   17.50
   3  -3  -2  144.69   16.00
   3  -3  -2  132.49   17.20
  -3   3   2  146.79   17.50
  -3   3   2  132.59    9.20
  -3   3   2  140.99   18.30
  -3   3   2  164.28   25.50
   2  -3  -2  193.08   16.90
   2  -3  -2  207.78   14.10
   2  -3  -2  182.98   18.30
   2  -3  -2  211.78   18.10
   2  -3  -2  192.68   18.40
  -2   3   2  185.58   18.30
  -2   3   2  204.28   26.00
  -2   3   2  210.08   20.30
  -2   3   2  192.48   13.30
  -2   3   2  210.58   17.50
   1  -3  -2 1987.70  118.89
   1  -3  -2 2085.99  121.39
   1  -3  -2 2014.10  118.29
   1  -3  -2 1987.30  121.69
   1  -3  -2 2013.90  120.29
  -1   3   2 2068.39  125.09
  -1   3   2 1876.91  119.29
  -1   3   2 1923.71  120.49
  -1   3   2 2041.10  121.69
   0  -3  -2  684.13   42.50
   0  -3  -2  547.65   39.20
   0  -3  -2  617.74   37.90
   0  -3  -2  645.94   43.40
   0   3   2  623.14   42.20
   0   3   2  640.04   45.40
   0   3   2  646.04   38.00
   0   3   2  560.64   41.90
  -1  -3  -2 1809.72  126.89
  -1  -3  -2 2044.70  126.79
  -1  -3  -2 2076.59  124.29
   1   3   2 1998.30  126.09
   1   3   2 2137.39  127.59
   1   3   2 2021.60  126.79
   1   3   2 2125.59  126.89
   1   3   2 2281.77  127.39
  -2  -3  -2  -16.90    9.00
  -2  -3  -2   -5.30   11.00
   2   3   2   10.60   11.50
   2   3   2    7.50    9.30
   2   3   2  -14.50    9.00
   2   3   2    2.50    8.90
  -3  -3  -2 1361.46   92.79
  -3  -3  -2 1384.96   83.79
  -3  -3  -2 1401.36   82.69
   3   3   2 1414.86   93.19
   3   3   2 1388.26   90.29
   3   3   2 1377.46   91.69
  -4  -3  -2  172.58   15.20
  -4  -3  -2  154.98   19.90
  -4  -3  -2  175.58   27.00
   4   3   2  183.58   25.90
   4   3   2  174.38   25.90
   4   3   2  134.09   27.00
  -5  -3  -2   44.30   20.90
  -5  -3  -2   35.30   14.30
   5   3   2   19.60   17.70
   5   3   2   38.50   20.40
   5   3   2   44.60   24.60
  -6  -3  -2  242.78   38.00
   6   3   2  270.27   38.50
   6   3   2  284.17   43.30
  -7  -3  -2  332.97   48.00
   7   3   2  500.05   53.09
   7   3   2  420.66   57.69
  -8  -3  -2   38.70   35.10
   8   3   2   68.59   40.80
   8   3   2   58.69   26.90
  -9  -3  -2  198.78   46.30
  -9  -3  -2  133.29   45.40
   9   3   2  205.88   56.09
   9  -4  -2   31.10   27.30
   9  -4  -2   -6.40   25.70
  -9   4   2   25.90   28.70
   8  -4  -2  633.44   59.99
   8  -4  -2  518.35   55.19
  -8   4   2  477.85   60.69
   7  -4  -2  -33.60   18.10
   7  -4  -2   38.20   23.10
   7  -4  -2   -3.50   17.70
  -7   4   2   -6.30   31.30
   6  -4  -2  549.15   48.20
   6  -4  -2  565.24   54.29
   6  -4  -2  599.54   48.90
  -6   4   2  520.55   47.90
  -6   4   2  600.84   60.29
   5  -4  -2  247.98   32.60
   5  -4  -2  171.88   24.40
   5  -4  -2  219.28   27.20
  -5   4   2  202.08   26.20
  -5   4   2  258.17   37.70
   4  -4  -2    5.70   11.60
   4  -4  -2    0.40   14.30
   4  -4  -2   -1.40    9.50
   4  -4  -2    9.10   11.50
  -4   4   2    6.20   22.90
  -4   4   2   38.30   12.80
  -4   4   2   15.30   11.30
   3  -4  -2 2346.97  139.89
   3  -4  -2 2386.26  141.79
   3  -4  -2 2418.16  139.49
   3  -4  -2 2309.77  140.69
   3  -4  -2 2010.70  140.29
  -3   4   2 2302.97  146.19
  -3   4   2 2195.58  139.99
  -3   4   2 2197.98  134.29
  -3   4   2 2355.36  138.99
  -3   4   2 2320.97  135.59
   2  -4  -2  463.85   34.00
   2  -4  -2  397.66   33.40
   2  -4  -2  492.25   28.80
   2  -4  -2  430.56   31.50
   2  -4  -2  450.25   30.90
  -2   4   2  451.25   32.80
  -2   4   2  394.16   27.80
  -2   4   2  472.15   40.10
  -2   4   2  435.56   29.90
  -2   4   2  415.96   32.00
   1  -4  -2 1103.59   67.09
   1  -4  -2 1037.40   64.69
   1  -4  -2 1019.80   68.39
   1  -4  -2 1097.29   65.19
   1  -4  -2 1012.70   68.39
  -1   4   2 1063.19   68.29
  -1   4   2 1073.99   72.99
  -1   4   2 1074.59   67.29
  -1   4   2 1071.09   66.09
   0  -4  -2 1126.39   70.09
   0  -4  -2 1040.50   69.59
   0  -4  -2 1074.09   66.49
   0  -4  -2 1055.39   63.59
   0   4   2 1069.79   64.19
   0   4   2 1113.29   72.79
   0   4   2 1023.70   69.39
   0   4   2 1020.30   68.89
   0   4   2 1106.89   64.89
  -1  -4  -2  570.84   41.40
  -1  -4  -2  487.75   40.40
  -1  -4  -2  510.05   36.80
  -1  -4  -2  557.94   32.60
   1   4   2  531.75   40.70
   1   4   2  518.45   39.90
   1   4   2  542.15   42.10
   1   4   2  596.94   42.90
  -2  -4  -2  518.35   41.20
  -2  -4  -2  423.46   38.30
  -2  -4  -2  443.86   34.40
   2   4   2  484.95   39.70
   2   4   2  545.45   40.70
   2   4   2  417.46   38.20
   2   4   2  474.75   39.50
  -3  -4  -2 2709.63  164.88
  -3  -4  -2 2493.05  163.98
  -3  -4  -2 2541.95  159.48
   3   4   2 2857.21  165.98
   3   4   2 2564.84  164.08
   3   4   2 2527.85  162.98
  -4  -4  -2  -11.80   17.10
  -4  -4  -2    7.80   17.70
  -4  -4  -2   12.80   11.20
   4   4   2    0.90   13.70
   4   4   2   12.40   19.80
   4   4   2   -4.30   15.60
  -5  -4  -2 1939.21  122.89
  -5  -4  -2 1822.52  128.89
  -5  -4  -2 1706.53  128.79
   5   4   2 2042.00  128.79
   5   4   2 1916.11  129.29
   5   4   2 2047.00  133.69
  -6  -4  -2  -28.90   24.60
  -6  -4  -2  -11.80   24.20
   6   4   2   -5.50   20.50
   6   4   2   19.80   28.70
  -7  -4  -2  262.57   44.90
  -7  -4  -2  291.07   46.60
   7   4   2  349.96   48.00
   7   4   2  467.15   58.99
  -8  -4  -2   61.79   36.90
  -8  -4  -2   30.20   33.40
   8   4   2  107.99   48.40
   8   4   2   73.79   31.30
   9   4   2    0.40   33.30
   9  -5  -2    7.80   26.40
   9  -5  -2   -3.70   24.90
  -9   5   2  -25.70   29.30
   8  -5  -2   16.00   23.90
   8  -5  -2    1.00   24.50
  -8   5   2   32.30   29.60
   7  -5  -2   30.10   23.10
   7  -5  -2   40.50   25.80
   7  -5  -2   11.30   20.70
  -7   5   2   31.80   34.40
  -7   5   2    7.70   22.40
   6  -5  -2  858.31   65.69
   6  -5  -2  801.92   71.59
   6  -5  -2  991.30   67.09
  -6   5   2  877.41   76.59
  -6   5   2  792.92   68.19
   5  -5  -2   25.20   15.50
   5  -5  -2   -8.70   15.30
   5  -5  -2    7.50   14.40
   5  -5  -2   16.80   20.20
  -5   5   2   19.90   25.10
  -5   5   2   22.70   14.40
   4  -5  -2 2122.19  131.29
   4  -5  -2 2129.09  132.09
   4  -5  -2 2240.58  134.39
   4  -5  -2 1715.73  133.79
  -4   5   2 2128.19  128.69
  -4   5   2 2285.57  140.79
  -4   5   2 2143.99  133.19
   3  -5  -2  289.87   30.80
   3  -5  -2  252.17   27.70
   3  -5  -2  254.67   23.70
   3  -5  -2  301.47   25.10
   3  -5  -2  228.28   21.00
   3  -5  -2  233.28   27.00
  -3   5   2  309.77   39.60
  -3   5   2  260.47   26.60
  -3   5   2  270.17   18.70
  -3   5   2  269.87   24.20
   2  -5  -2 2048.40  126.89
   2  -5  -2 2232.68  126.29
   2  -5  -2 2105.99  131.19
   2  -5  -2 2029.60  130.69
   2  -5  -2 2065.79  128.69
  -2   5   2 2184.48  129.09
  -2   5   2 2058.89  126.99
  -2   5   2 2134.69  136.59
  -2   5   2 2076.89  129.29
   1  -5  -2  896.91   52.29
   1  -5  -2  798.62   54.99
   1  -5  -2  860.11   53.89
   1  -5  -2  853.41   58.49
   1  -5  -2  869.21   58.39
  -1   5   2  853.61   54.69
  -1   5   2  827.02   55.89
  -1   5   2  852.51   57.79
  -1   5   2  836.92   54.19
  -1   5   2  784.92   62.79
   0  -5  -2  224.08   19.80
   0  -5  -2  242.58   26.30
   0  -5  -2  219.38   24.80
   0   5   2  209.18   18.70
   0   5   2  222.48   29.80
   0   5   2  218.58   22.90
   0   5   2  199.98   24.40
   0   5   2  235.78   16.80
  -1  -5  -2 3039.00  189.98
  -1  -5  -2 3512.05  194.58
  -1  -5  -2 2905.11  193.28
   1   5   2 3152.58  196.18
   1   5   2 3244.48  194.08
   1   5   2 3149.49  196.38
  -2  -5  -2  408.16   38.30
  -2  -5  -2  362.96   36.30
  -2  -5  -2  395.66   31.60
   2   5   2  357.66   35.80
   2   5   2  395.56   37.60
   2   5   2  392.26   38.00
  -3  -5  -2 1179.48   75.29
  -3  -5  -2 1136.19   81.19
  -3  -5  -2 1140.19   80.79
   3   5   2 1113.09   80.99
   3   5   2 1089.79   80.49
  -4  -5  -2  253.47   29.40
  -4  -5  -2  299.67   38.30
  -4  -5  -2  273.97   37.00
   4   5   2  291.97   42.10
   4   5   2  407.76   40.10
   4   5   2  359.06   41.40
  -5  -5  -2   31.90   24.70
  -5  -5  -2   21.80   22.80
   5   5   2   34.30   23.30
   5   5   2  -12.90   26.50
   5   5   2   45.20   23.20
  -6  -5  -2   65.49   29.40
  -6  -5  -2   72.49   30.80
   6   5   2   62.69   36.10
   6   5   2   65.29   27.60
  -7  -5  -2  273.17   46.10
  -7  -5  -2  249.58   45.40
   7   5   2  244.08   52.39
   7   5   2  270.07   44.40
  -8  -5  -2  -10.40   32.60
   8   5   2   -6.50   28.90
   9  -6  -2    5.80   28.90
  -9   6   2   83.99   39.90
   8  -6  -2  260.87   40.50
   8  -6  -2  296.37   42.80
  -8   6   2  237.28   45.20
   7  -6  -2   -5.90   20.20
   7  -6  -2   28.30   26.70
   7  -6  -2   11.30   22.40
  -7   6   2   29.10   35.60
  -7   6   2   -3.20   23.80
   6  -6  -2 1006.10   72.49
   6  -6  -2  960.10   70.99
   6  -6  -2  917.81   79.49
  -6   6   2 1005.80   84.89
  -6   6   2  885.41   76.09
   5  -6  -2   -4.10   13.50
   5  -6  -2   -6.30   14.50
   5  -6  -2   -5.10   18.90
   5  -6  -2    3.50   18.30
  -5   6   2    5.50   30.00
  -5   6   2  -17.90   14.70
  -5   6   2    2.00   16.90
   4  -6  -2  547.85   45.80
   4  -6  -2  549.35   42.50
   4  -6  -2  442.86   47.80
   4  -6  -2  532.35   41.90
  -4   6   2  568.04   46.50
  -4   6   2  549.54   57.59
  -4   6   2  520.25   43.60
   3  -6  -2  156.38   20.60
   3  -6  -2  156.78   23.80
   3  -6  -2  180.58   24.90
   3  -6  -2  202.48   21.30
   3  -6  -2  188.18   18.10
   3  -6  -2  184.58   28.60
  -3   6   2  146.49   21.10
  -3   6   2  185.08   33.70
  -3   6   2  199.58   22.00
  -3   6   2  155.68   22.20
   2  -6  -2  805.92   55.39
   2  -6  -2  848.02   53.39
   2  -6  -2  801.82   58.59
   2  -6  -2  733.03   58.69
   2  -6  -2  848.32   53.09
  -2   6   2  826.62   56.29
  -2   6   2  820.02   56.99
  -2   6   2  854.91   66.79
  -2   6   2  842.72   56.39
  -2   6   2  804.22   53.59
   1  -6  -2   12.50   14.20
   1  -6  -2    9.40    7.70
   1  -6  -2  -13.50   11.20
   1  -6  -2   19.90    9.40
  -1   6   2   10.60    9.40
  -1   6   2    7.40    9.10
  -1   6   2    4.50    7.90
  -1   6   2    0.40   19.10
  -1   6   2    3.30   12.50
   0  -6  -2 3118.59  188.58
   0  -6  -2 3214.88  192.28
   0  -6  -2 3109.99  188.58
   0  -6  -2 3160.88  193.18
   0   6   2 3321.77  197.98
   0   6   2 3052.29  197.28
   0   6   2 3003.40  191.48
  -1  -6  -2  201.08   21.40
  -1  -6  -2  185.28   25.00
  -1  -6  -2  201.58   26.90
   1   6   2  179.78   25.20
   1   6   2  212.78   32.10
   1   6   2  178.28   30.60
  -2  -6  -2 1592.04   96.39
  -2  -6  -2 1578.84  101.99
   2   6   2 1301.87  101.49
   2   6   2 1473.75  103.09
   2   6   2 1523.45  101.29
  -3  -6  -2   16.80   12.40
  -3  -6  -2   15.50   20.40
  -3  -6  -2   -0.30   18.60
   3   6   2   37.80   21.00
   3   6   2   11.70   17.90
  -4  -6  -2   20.40   15.30
  -4  -6  -2  105.99   27.70
  -4  -6  -2   76.39   25.20
   4   6   2   99.69   26.00
   4   6   2   49.10   24.90
  -5  -6  -2  142.49   32.70
  -5  -6  -2  154.88   36.50
   5   6   2  161.28   31.80
   5   6   2  178.38   34.40
  -6  -6  -2  120.09   34.00
  -6  -6  -2  217.58   40.90
   6   6   2  224.88   40.90
  -7  -6  -2  235.68   49.00
   7   6   2  361.36   55.59
  -8  -6  -2  112.59   41.60
   8   6   2  130.59   40.80
   8  -7  -2   77.09   28.60
  -8   7   2   71.29   37.30
   7  -7  -2  596.54   58.09
   7  -7  -2  615.64   58.79
  -7   7   2  524.65   61.89
  -7   7   2  468.55   64.59
   6  -7  -2   88.19   32.30
   6  -7  -2  104.29   25.60
   6  -7  -2   79.29   24.80
  -6   7   2   72.29   37.30
  -6   7   2  151.38   34.00
   5  -7  -2  412.96   40.90
   5  -7  -2  278.87   44.30
   5  -7  -2  388.46   37.60
   5  -7  -2  408.26   46.30
  -5   7   2  418.26   55.19
  -5   7   2  372.96   45.20
   4  -7  -2  749.33   61.59
   4  -7  -2  729.33   53.99
   4  -7  -2  714.53   55.49
   4  -7  -2  641.74   62.89
  -4   7   2  777.92   59.79
  -4   7   2  847.02   70.19
  -4   7   2  773.32   58.59
   3  -7  -2   -6.00   13.80
   3  -7  -2    1.60   11.60
   3  -7  -2   -4.30   16.90
   3  -7  -2    0.20    9.20
  -3   7   2   10.00   14.00
  -3   7   2    4.40   13.40
  -3   7   2   21.10   28.40
   2  -7  -2  964.30   72.99
   2  -7  -2 1116.59   68.39
   2  -7  -2 1029.00   75.09
   2  -7  -2 1048.00   69.49
  -2   7   2 1075.99   71.29
  -2   7   2 1077.79   71.19
  -2   7   2 1004.60   81.49
   1  -7  -2  616.54   44.80
   1  -7  -2  613.84   51.09
   1  -7  -2  614.54   44.40
   1  -7  -2  673.33   50.09
  -1   7   2  652.33   46.80
  -1   7   2  637.74   57.79
  -1   7   2  646.04   47.10
   0  -7  -2  290.97   26.20
   0  -7  -2  298.07   27.00
   0  -7  -2  255.27   31.40
   0  -7  -2  274.57   33.70
   0   7   2  263.27   30.00
   0   7   2  297.37   42.20
   0   7   2  316.47   32.10
   0   7   2  386.66   46.70
  -1  -7  -2  290.87   28.20
  -1  -7  -2  251.47   33.10
  -1  -7  -2  255.67   31.80
   1   7   2  240.28   39.20
   1   7   2  231.18   37.50
   1   7   2  279.47   33.20
  -2  -7  -2  322.17   39.00
  -2  -7  -2  273.07   28.70
  -2  -7  -2  291.27   35.20
   2   7   2  263.77   34.60
   2   7   2  229.68   37.90
   2   7   2  348.47   44.40
  -3  -7  -2   35.60   14.80
  -3  -7  -2    1.10   19.90
  -3  -7  -2   -6.90   18.40
   3   7   2   11.40   19.20
   3   7   2   28.10   24.30
  -4  -7  -2 1019.00   82.39
  -4  -7  -2  913.71   76.99
   4   7   2 1050.79   81.89
   4   7   2  957.40   80.19
  -5  -7  -2   21.30   30.50
  -5  -7  -2   37.30   28.50
   5   7   2   33.40   28.90
  -6  -7  -2  479.15   64.39
   6   7   2  786.02   77.59
  -7  -7  -2   21.80   34.90
   7   7   2   23.40   36.30
   8  -8  -2  -23.20   22.70
  -8   8   2   25.50   33.30
   7  -8  -2   16.10   22.10
  -7   8   2   46.90   33.50
   6  -8  -2   24.20   30.40
   6  -8  -2   31.50   21.70
   6  -8  -2   86.39   31.80
  -6   8   2   46.40   36.10
  -6   8   2   32.80   30.80
   5  -8  -2  499.65   45.90
   5  -8  -2  522.95   56.29
   5  -8  -2  387.86   55.19
  -5   8   2  547.05   67.29
  -5   8   2  555.64   56.89
   4  -8  -2   31.60   22.10
   4  -8  -2   60.09   29.70
   4  -8  -2   37.40   17.20
  -4   8   2   26.70   21.70
  -4   8   2   28.10   34.40
  -4   8   2    7.70   18.30
   3  -8  -2 1641.84  112.79
   3  -8  -2 1691.43  110.79
   3  -8  -2 1472.05  104.19
  -3   8   2 1725.93  108.79
  -3   8   2 1617.54  108.19
  -3   8   2 1669.53  121.39
   2  -8  -2   85.39   15.60
   2  -8  -2  112.79   18.00
   2  -8  -2  122.59   27.50
   2  -8  -2   97.49   22.70
  -2   8   2  139.49   36.80
  -2   8   2   99.79   21.00
   1  -8  -2 1108.09   85.29
   1  -8  -2 1212.78   82.59
   1  -8  -2 1242.78   77.99
   1  -8  -2 1131.09   76.69
  -1   8   2 1224.98   94.79
  -1   8   2 1189.08   91.99
  -1   8   2 1171.28   83.69
   0  -8  -2  927.71   64.99
   0  -8  -2  926.21   73.19
   0  -8  -2 1006.30   69.39
   0   8   2  942.11   68.39
   0   8   2  869.61   79.59
   0   8   2  958.40   80.59
  -1  -8  -2   23.90   12.70
  -1  -8  -2   62.09   20.30
  -1  -8  -2   58.29   23.50
   1   8   2   11.60   24.30
   1   8   2   23.40   18.60
   1   8   2   20.90   24.90
  -2  -8  -2  976.10   68.59
  -2  -8  -2  789.32   69.89
  -2  -8  -2  878.51   64.29
   2   8   2  934.41   77.09
   2   8   2  661.63   72.19
   2   8   2  957.80   71.69
  -3  -8  -2  128.19   33.40
  -3  -8  -2  155.48   29.90
   3   8   2  126.19   30.10
   3   8   2   77.69   32.40
  -4  -8  -2  236.98   42.20
  -4  -8  -2  221.28   40.30
   4   8   2  190.58   38.30
   4   8   2  163.78   37.80
  -5  -8  -2   56.19   33.10
   5   8   2   69.69   33.00
  -6  -8  -2   42.70   35.00
   6   8   2   50.49   33.80
  -7  -8  -2   43.00   39.00
   7   8   2   -1.80   43.20
   7  -9  -2  826.22   69.49
  -7   9   2  800.02   78.99
   6  -9  -2    6.80   32.20
   6  -9  -2   43.20   23.30
  -6   9   2   56.49   32.70
  -6   9   2   67.89   38.40
   5  -9  -2  388.26   41.40
   5  -9  -2  364.76   48.40
   5  -9  -2  281.87   50.99
  -5   9   2  502.85   53.59
  -5   9   2  385.36   61.19
   4  -9  -2   42.50   17.70
   4  -9  -2   25.30   27.00
   4  -9  -2   -7.30   27.10
  -4   9   2   24.70   21.70
  -4   9   2  -30.90   31.50
   3  -9  -2   67.69   28.20
   3  -9  -2   39.50   21.80
   3  -9  -2   43.00   15.80
  -3   9   2   42.70   34.90
   2  -9  -2  115.89   25.90
   2  -9  -2  149.19   33.30
  -2   9   2   83.79   36.80
   1  -9  -2  288.87   30.60
   1  -9  -2  270.97   42.20
   1  -9  -2  330.67   37.20
  -1   9   2  347.37   55.19
  -1   9   2  352.96   55.39
   0  -9  -2  107.59   20.20
   0  -9  -2  115.99   23.80
   0  -9  -2  163.68   33.10
   0   9   2   62.49   33.40
   0   9   2  149.99   25.80
   0   9   2  142.99   39.80
  -1  -9  -2  517.35   48.20
  -1  -9  -2  606.94   55.59
   1   9   2  423.56   59.49
   1   9   2  495.35   50.39
   1   9   2  604.34   63.29
  -2  -9  -2  -20.70   22.70
  -2  -9  -2    5.40   19.00
   2   9   2   35.70   30.00
   2   9   2   29.10   22.40
  -3  -9  -2  406.56   52.59
   3   9   2  416.06   51.99
   3   9   2  429.26   58.49
  -4  -9  -2  457.75   58.89
   4   9   2  405.86   56.69
   4   9   2  488.35   62.99
  -5  -9  -2  -12.20   31.80
   5   9   2   45.70   33.20
  -6  -9  -2  344.57   53.79
   6   9   2  329.17   56.19
  -7  10   2    6.20   37.30
   6 -10  -2   49.10   38.50
  -6  10   2   49.30   40.60
  -6  10   2   45.70   36.70
   5 -10  -2   84.49   34.70
   5 -10  -2  116.19   42.40
  -5  10   2   73.49   38.60
   4 -10  -2  -28.70   25.10
   4 -10  -2    0.00   35.70
  -4  10   2   21.80   38.90
   3 -10  -2  775.72   74.39
   3 -10  -2  623.64   75.69
  -3  10   2  789.72   79.29
   2 -10  -2   14.90   28.40
   2 -10  -2   29.80   21.80
  -2  10   2   47.20   41.30
  -2  10   2   67.49   40.90
   1 -10  -2  776.42   74.69
   1 -10  -2  789.92   62.79
  -1  10   2  713.93   83.39
  -1  10   2  645.94   81.59
   0 -10  -2   21.50   17.90
   0 -10  -2  -12.70   23.50
   0  10   2    1.10   30.10
   0  10   2  -13.00   30.00
  -1 -10  -2   51.89   21.60
  -1 -10  -2   61.99   32.20
   1  10   2  -28.20   28.70
   1  10   2   75.89   39.10
   1  10   2   56.19   25.30
  -2 -10  -2   -9.50   28.10
   2  10   2   23.70   30.70
   2  10   2    5.10   25.10
  -3 -10  -2  595.34   69.69
   3  10   2  677.83   68.09
   3  10   2  567.04   70.89
  -4 -10  -2    8.60   30.90
   4  10   2    7.50   31.90
  -5 -10  -2  525.45   69.59
   5  10   2  562.14   70.69
   6 -11  -2  108.59   42.00
  -6  11   2  226.08   51.99
   5 -11  -2    2.70   28.70
  -5  11   2   72.29   42.90
   4 -11  -2  422.66   62.09
   4 -11  -2  428.56   67.39
  -4  11   2  615.94   78.89
  -4  11   2  491.15   77.79
   3 -11  -2   21.50   30.60
   3 -11  -2  -69.79   35.20
  -3  11   2   36.50   41.60
  -3  11   2   64.69   40.80
   2 -11  -2  272.07   40.00
   2 -11  -2  168.08   42.30
  -2  11   2  181.78   57.09
  -2  11   2  190.98   52.29
   1 -11  -2  257.77   37.10
   1 -11  -2  234.88   43.70
  -1  11   2  250.07   54.89
  -1  11   2   95.19   45.30
   0 -11  -2   44.20   31.50
   0  11   2   46.40   37.50
   0  11   2  -12.60   37.60
  -1 -11  -2  648.84   68.29
   1  11   2  528.85   70.49
  -2 -11  -2   -6.90   33.10
   2  11   2   36.60   34.50
   2  11   2  -21.30   25.70
  -3 -11  -2  668.33   75.49
   3  11   2  561.04   65.49
   3  11   2  712.73   80.49
  -4 -11  -2   -8.20   40.40
   4  11   2  -24.20   32.30
   4 -12  -2   46.70   46.20
   4 -12  -2  147.79   43.40
  -4  12   2  155.38   60.59
  -4  12   2  173.78   55.89
   3 -12  -2  172.38   46.30
   3 -12  -2   10.30   46.80
  -3  12   2  163.48   53.09
  -3  12   2   18.70   46.10
   2 -12  -2   39.50   33.10
  -2  12   2   42.40   42.40
  -2  12   2   95.19   50.59
   1 -12  -2   53.79   34.30
  -1  12   2   97.09   49.00
  -1  12   2   75.49   51.29
   0 -12  -2  399.36   57.59
   0  12   2  540.15   79.29
   0  12   2  308.77   65.69
  -1 -12  -2   -5.40   35.00
   1  12   2   55.09   38.40
  -2 -12  -2  269.07   55.69
   2  12   2  291.77   58.19
   3  12   2   57.39   61.09
   2 -13  -2  201.88   90.39
  -1  13   2   16.50   61.99
   2  13  -3   40.10   39.50
  -2 -13   3   54.89   39.00
  -2 -13   3    9.70   30.60
   1  13  -3  232.98   52.69
  -1 -13   3  335.47   45.40
   0  13  -3   25.20   35.80
   0 -13   3  -14.00   24.00
  -1  13  -3  448.46   61.49
   1 -13   3  453.55   54.09
  -2  13  -3  -39.10   32.30
   2 -13   3   19.90   28.40
   2 -13   3  -30.60   42.60
  -3  13  -3  218.58   53.39
   3 -13   3  203.88   43.80
   3 -13   3  246.18   57.49
   4  12  -3  -16.40   39.10
   4  12  -3    0.30   30.90
  -4 -12   3   36.40   32.60
   3  12  -3   87.19   45.20
  -3 -12   3   76.19   30.60
  -3 -12   3   85.69   35.00
   2  12  -3  313.97   59.89
  -2 -12   3  241.78   41.60
  -2 -12   3  363.36   56.09
   1  12  -3   20.20   35.20
  -1 -12   3   31.00   28.00
  -1 -12   3   28.30   30.70
   0  12  -3  384.46   58.29
   0 -12   3  321.17   44.50
  -1  12  -3  -10.00   34.20
   1 -12   3   33.60   28.10
  -2  12  -3   90.59   38.00
   2 -12   3   74.29   29.90
   2 -12   3    0.80   40.40
  -3  12  -3  252.67   50.79
   3 -12   3  264.47   42.50
   3 -12   3  223.48   54.89
  -4  12  -3   33.10   35.30
   4 -12   3   34.00   31.80
   4 -12   3  -41.60   39.30
  -5  12  -3  404.56   64.39
  -5  12  -3  177.68   73.29
   5 -12   3  456.75   74.29
   5  11  -3   66.89   46.90
   5  11  -3   46.30   35.00
  -5 -11   3   19.90   30.40
   4  11  -3  169.18   48.10
   4  11  -3  158.28   39.80
  -4 -11   3  241.38   50.89
   3  11  -3   27.20   26.80
   3  11  -3   19.70   37.30
  -3 -11   3    9.90   30.50
  -3 -11   3   67.29   27.80
   2  11  -3  226.88   36.90
   2  11  -3  159.38   47.50
  -2 -11   3  249.58   38.90
  -2 -11   3  281.07   45.00
   1  11  -3   25.80   29.30
  -1 -11   3   -1.20   22.40
  -1 -11   3   17.90   25.50
   0  11  -3   18.00   27.70
   0 -11   3    4.60   21.80
   0 -11   3    7.50   24.10
  -1  11  -3  192.68   44.40
   1 -11   3  202.88   36.80
  -2  11  -3  305.97   52.29
   2 -11   3  324.57   52.19
   2 -11   3  432.36   50.29
  -3  11  -3  -52.59   30.50
  -3  11  -3   30.70   32.50
   3 -11   3    5.10   37.50
   3 -11   3   11.90   24.50
  -4  11  -3  452.25   62.79
  -4  11  -3  509.75   64.99
   4 -11   3  530.65   60.89
   4 -11   3  567.14   69.49
  -5  11  -3   96.49   43.30
  -5  11  -3   86.89   40.00
   5 -11   3  170.08   49.60
  -6  11  -3   68.59   44.90
  -6  11  -3  169.88   50.39
   6 -11   3  160.38   54.49
   6  10  -3  112.79   51.39
   6  10  -3  212.78   47.20
  -6 -10   3  200.68   48.10
   5  10  -3  179.38   49.00
   5  10  -3  252.57   45.80
  -5 -10   3  361.96   58.89
   4  10  -3   28.10   35.50
   4  10  -3   32.30   28.60
  -4 -10   3    5.50   22.20
  -4 -10   3   37.90   32.00
   3  10  -3  298.57   54.49
   3  10  -3  234.08   39.70
  -3 -10   3  311.47   51.09
  -3 -10   3  222.48   35.40
   2  10  -3  978.20   78.79
   2  10  -3 1025.80   87.19
  -2 -10   3 1055.39   84.19
  -2 -10   3  965.20   76.69
   1  10  -3  153.28   27.60
   1  10  -3   99.19   32.60
  -1 -10   3   84.79   29.10
  -1 -10   3   99.69   25.60
   0  10  -3 1006.10   89.69
   0 -10   3 1164.48   83.59
   0 -10   3 1130.09   84.09
  -1  10  -3  -10.30   23.40
  -1  10  -3   23.70   21.80
  -1  10  -3    5.90   27.50
   1 -10   3   -6.20   21.10
   1 -10   3    9.20   17.40
  -2  10  -3  720.23   65.19
  -2  10  -3  647.94   70.49
  -2  10  -3  620.24   61.19
   2 -10   3  544.35   64.49
   2 -10   3  656.33   59.79
  -3  10  -3   -8.30   27.70
  -3  10  -3   -1.40   27.80
  -3  10  -3   12.10   23.80
   3 -10   3   46.20   31.40
   3 -10   3  -19.80   22.10
  -4  10  -3   14.80   29.70
  -4  10  -3   53.39   33.30
   4 -10   3   50.69   36.20
   4 -10   3   83.89   30.90
  -5  10  -3   31.60   32.40
  -5  10  -3   10.00   35.80
   5 -10   3   36.00   38.00
  -6  10  -3  154.68   44.70
  -6  10  -3   64.99   38.10
   6 -10   3  146.69   49.20
  -7  10  -3   80.29   46.70
   7 -10   3  197.88   57.09
   7   9  -3  639.34   71.89
   7   9  -3  219.38   70.79
  -7  -9   3  374.46   57.99
   6   9  -3   50.39   35.30
   6   9  -3   64.59   46.40
  -6  -9   3   66.99   32.80
   5   9  -3  188.48   41.30
   5   9  -3   98.89   41.70
  -5  -9   3  122.89   37.50
   4   9  -3  187.48   46.00
   4   9  -3  240.58   41.60
  -4  -9   3  192.98   31.50
  -4  -9   3  204.68   43.30
   3   9  -3   44.20   23.90
   3   9  -3   37.70   29.70
  -3  -9   3   58.19   20.80
  -3  -9   3   40.40   26.70
   2   9  -3  579.14   60.99
   2   9  -3  616.64   55.59
  -2  -9   3  676.93   61.29
  -2  -9   3  632.04   53.39
   1   9  -3  652.73   65.49
   1   9  -3  799.82   60.39
  -1  -9   3  792.72   60.79
  -1  -9   3  789.82   64.89
  -1  -9   3  692.83   59.19
   0   9  -3  104.79   29.80
   0   9  -3  149.59   27.00
   0   9  -3  110.89   26.80
   0  -9   3  132.99   27.10
   0  -9   3  152.58   22.40
   0  -9   3  136.79   26.10
  -1   9  -3  626.14   61.29
  -1   9  -3  687.33   60.09
  -1   9  -3  596.24   56.39
  -1   9  -3  622.64   58.49
   1  -9   3  624.94   54.89
   1  -9   3  645.74   50.99
   1  -9   3  662.13   53.09
  -2   9  -3  467.95   48.50
  -2   9  -3  540.25   52.99
  -2   9  -3  509.55   50.89
  -2   9  -3  526.85   52.89
   2  -9   3  525.75   56.09
   2  -9   3  425.06   42.00
   2  -9   3  421.76   46.30
  -3   9  -3   40.20   22.80
  -3   9  -3   69.49   30.70
  -3   9  -3   27.80   27.40
   3  -9   3   13.40   20.80
   3  -9   3   50.69   24.20
   3  -9   3   45.30   27.90
  -4   9  -3  728.33   67.69
  -4   9  -3  700.83   67.09
   4  -9   3  641.64   61.39
   4  -9   3  742.43   74.99
  -5   9  -3   15.80   28.80
   5  -9   3   32.90   33.60
  -6   9  -3  268.37   49.30
   6  -9   3  309.77   57.39
  -7   9  -3   73.79   40.40
   7  -9   3   52.29   47.40
   8   8  -3  -17.50   74.29
   7   8  -3  -69.49   42.60
   7   8  -3  -14.70   31.70
  -7  -8   3   62.39   33.20
   6   8  -3  -35.40   35.70
   6   8  -3  -32.20   23.20
  -6  -8   3   14.50   32.10
   5   8  -3  998.60   82.89
   5   8  -3 1117.19   98.09
  -5  -8   3 1057.19   88.49
  -5  -8   3  878.31   73.59
   4   8  -3    2.30   29.30
   4   8  -3    2.50   21.40
  -4  -8   3   -3.50   25.50
  -4  -8   3   -3.60   16.70
   3   8  -3 2340.87  154.78
   3   8  -3 2338.57  160.68
  -3  -8   3 2406.36  158.38
  -3  -8   3 2335.27  149.19
   2   8  -3   15.70   22.70
   2   8  -3   21.70   16.70
  -2  -8   3   30.90   16.50
  -2  -8   3   12.00   11.70
  -2  -8   3   21.00   19.90
   1   8  -3  305.87   42.50
   1   8  -3  377.06   36.80
   1   8  -3  374.46   36.50
  -1  -8   3  408.06   41.10
  -1  -8   3  380.26   36.60
  -1  -8   3  403.96   35.10
   0   8  -3   21.30   18.70
   0   8  -3   27.70   19.90
   0   8  -3   11.30   18.50
   0  -8   3   27.60   16.20
   0  -8   3   29.90   18.00
   0  -8   3   26.40   12.20
  -1   8  -3  456.35   43.90
  -1   8  -3  459.25   47.40
  -1   8  -3  484.85   44.70
  -1   8  -3  397.26   47.90
   1  -8   3  522.25   42.10
   1  -8   3  430.96   38.30
   1  -8   3  454.95   41.10
  -2   8  -3  102.89   25.10
  -2   8  -3   95.09   27.30
  -2   8  -3   97.99   25.00
  -2   8  -3  106.89   23.60
   2  -8   3   62.29   26.00
   2  -8   3  115.09   19.60
   2  -8   3  127.89   23.40
   2  -8   3  126.69   23.80
  -3   8  -3 1085.39   81.59
  -3   8  -3 1212.18   87.09
  -3   8  -3 1171.18   82.09
  -3   8  -3 1171.18   84.09
   3  -8   3 1116.99   86.79
   3  -8   3 1127.49   80.29
   3  -8   3 1074.49   82.49
  -4   8  -3  122.79   30.90
   4  -8   3   77.39   24.20
   4  -8   3  112.39   35.50
  -5   8  -3  391.66   50.19
   5  -8   3  339.77   36.50
   5  -8   3  443.46   57.59
  -6   8  -3   38.70   33.60
   6  -8   3   75.89   24.20
   6  -8   3   75.69   42.50
  -7   8  -3   38.60   38.10
   7  -8   3   85.89   26.80
   7  -8   3   72.19   44.60
  -8   8  -3  481.45   66.49
   8  -8   3  333.67   65.89
   8  -8   3  463.95   54.89
   8   7  -3  -14.50   45.80
   8   7  -3   19.80   33.10
  -8  -7   3  127.69   40.20
   7   7  -3  288.57   65.79
   7   7  -3  449.95   58.59
  -7  -7   3  411.16   59.49
   6   7  -3  425.86   72.19
   6   7  -3  459.05   56.49
   5   7  -3   50.39   35.80
   5   7  -3   91.59   29.90
  -5  -7   3   97.09   21.50
   4   7  -3  539.95   63.29
   4   7  -3  520.65   53.79
  -4  -7   3  473.55   40.90
  -4  -7   3  418.56   41.10
   3   7  -3  349.96   46.80
   3   7  -3  386.76   41.60
  -3  -7   3  302.07   32.90
  -3  -7   3  374.46   33.10
   2   7  -3  110.19   21.50
   2   7  -3  142.19   19.30
   2   7  -3  132.19   28.70
  -2  -7   3   96.09   18.80
  -2  -7   3  135.19   27.30
  -2  -7   3  127.19   19.10
   1   7  -3 1374.36  106.99
   1   7  -3 1704.83  111.99
   1   7  -3 1749.53  107.79
  -1  -7   3 1632.64  104.99
  -1  -7   3 1828.82  106.79
  -1  -7   3 1661.13  110.49
   0   7  -3  115.19   22.30
   0   7  -3   39.80   19.80
   0   7  -3   79.59   22.00
   0  -7   3  107.79   21.10
   0  -7   3   70.59   16.40
   0  -7   3   46.30   12.70
  -1   7  -3 3144.29  193.08
  -1   7  -3 3360.46  192.28
  -1   7  -3 3095.69  193.38
  -1   7  -3 3102.89  194.68
   1  -7   3 3131.99  190.78
   1  -7   3 3199.58  191.78
   1  -7   3 2718.23  187.78
  -2   7  -3  103.49   24.60
  -2   7  -3  125.59   23.50
  -2   7  -3   65.59   18.90
  -2   7  -3  109.49   21.90
   2  -7   3   80.49   16.30
   2  -7   3   74.29   18.90
   2  -7   3   92.79   22.90
   2  -7   3   75.59   19.20
  -3   7  -3  937.41   66.39
  -3   7  -3  940.01   67.19
  -3   7  -3  935.51   69.09
   3  -7   3  816.02   65.89
   3  -7   3  991.50   67.09
   3  -7   3  904.31   60.69
   3  -7   3  883.91   69.79
  -4   7  -3  263.87   36.70
  -4   7  -3  251.37   32.20
   4  -7   3  169.18   28.70
   4  -7   3  157.58   21.50
   4  -7   3  130.99   31.20
  -5   7  -3   41.50   27.10
   5  -7   3   24.40   30.80
   5  -7   3   49.80   17.50
  -6   7  -3  170.78   39.40
   6  -7   3  263.87   32.70
   6  -7   3  204.88   46.00
  -7   7  -3  328.37   52.39
   7  -7   3  336.17   40.10
   7  -7   3  283.57   55.59
  -8   7  -3   49.80   40.40
   8  -7   3   87.99   44.00
   8  -7   3   26.80   25.50
   8   6  -3  262.27   65.29
   8   6  -3  340.77   52.79
  -8  -6   3  620.84   68.69
   7   6  -3   69.99   44.70
   7   6  -3   83.09   33.90
  -7  -6   3   75.49   34.50
   6   6  -3  604.44   81.29
   6   6  -3  655.03   63.59
   5   6  -3  407.96   58.99
   5   6  -3  347.17   44.90
  -5  -6   3  428.16   38.10
  -5  -6   3  442.46   40.30
   4   6  -3  266.07   36.30
   4   6  -3  355.96   48.10
  -4  -6   3  258.47   28.70
  -4  -6   3  328.67   31.10
   3   6  -3 1296.87   92.89
   3   6  -3 1201.98   87.49
   3   6  -3 1319.47   78.79
  -3  -6   3 1233.48   82.59
  -3  -6   3 1293.27   83.49
   2   6  -3  421.56   39.90
   2   6  -3  516.05   38.20
   2   6  -3  549.95   46.20
   2   6  -3  489.15   32.30
  -2  -6   3  501.65   37.60
  -2  -6   3  491.35   37.80
  -2  -6   3  429.36   41.80
   1   6  -3  434.26   29.40
   1   6  -3  373.46   38.30
   1   6  -3  477.25   36.50
   1   6  -3  433.36   39.60
  -1  -6   3  453.85   34.60
  -1  -6   3  433.86   38.80
  -1  -6   3  402.66   33.80
   0   6  -3  503.55   43.10
   0   6  -3  471.15   43.10
   0   6  -3  544.15   43.10
   0  -6   3  551.04   39.50
   0  -6   3  466.75   37.40
   0  -6   3  494.85   40.90
  -1   6  -3  467.75   41.60
  -1   6  -3  444.66   40.30
  -1   6  -3  439.96   39.20
  -1   6  -3  487.65   39.10
   1  -6   3  434.36   35.30
   1  -6   3  502.75   30.90
   1  -6   3  452.35   37.80
   1  -6   3  519.75   38.90
  -2   6  -3    3.20   15.00
  -2   6  -3    4.50   13.20
  -2   6  -3    2.80   11.90
  -2   6  -3   24.00   16.10
   2  -6   3    3.70   11.40
   2  -6   3   19.30   14.10
   2  -6   3    7.10   15.30
   2  -6   3   -0.30   12.80
   2  -6   3    1.60    7.20
  -3   6  -3 1221.78   76.99
  -3   6  -3 1141.29   80.69
  -3   6  -3 1043.50   78.09
   3  -6   3 1084.49   77.69
   3  -6   3 1105.19   80.49
   3  -6   3 1171.98   73.19
   3  -6   3 1162.78   79.19
   3  -6   3 1097.19   77.29
  -4   6  -3    4.20   17.60
  -4   6  -3   12.90   15.50
   4  -6   3    7.90   19.60
   4  -6   3   10.70   12.10
  -5   6  -3 1165.98   85.19
   5  -6   3 1121.79   75.79
   5  -6   3  970.30   86.59
  -6   6  -3   -6.00   25.20
   6  -6   3   14.20   18.70
   6  -6   3   37.70   32.80
  -7   6  -3  270.37   47.90
   7  -6   3  325.07   39.40
   7  -6   3  270.47   54.79
  -8   6  -3    6.40   33.40
   8  -6   3    6.10   42.70
   8  -6   3   13.60   26.20
   9  -6   3   54.59   75.79
   9   5  -3   14.40   43.60
   8   5  -3   41.00   46.10
   8   5  -3   10.20   28.60
  -8  -5   3   62.09   29.30
   7   5  -3   47.80   42.00
   7   5  -3   18.80   26.90
  -7  -5   3   76.69   33.60
   6   5  -3  681.13   61.09
   6   5  -3  662.33   49.00
   6   5  -3  608.14   78.49
  -6  -5   3  578.94   50.49
   5   5  -3   57.59   14.20
   5   5  -3   40.20   19.30
   5   5  -3   31.70   31.40
  -5  -5   3   74.79   16.70
  -5  -5   3   42.20   15.80
   4   5  -3  954.90   61.49
   4   5  -3  912.11   69.49
   4   5  -3  891.71   75.69
  -4  -5   3  927.31   62.99
  -4  -5   3  981.80   64.59
   3   5  -3   -0.40    6.60
   3   5  -3    2.50   12.90
   3   5  -3    0.50   16.50
  -3  -5   3   -6.20    9.80
  -3  -5   3   12.40    9.50
   2   5  -3  665.63   41.60
   2   5  -3  595.84   49.70
   2   5  -3  693.53   46.80
   2   5  -3  585.74   47.30
  -2  -5   3  605.34   49.50
  -2  -5   3  654.23   48.30
  -2  -5   3  657.63   45.20
  -2  -5   3  643.64   43.90
   1   5  -3  526.35   39.50
   1   5  -3  516.95   41.20
   1   5  -3  557.54   35.30
   1   5  -3  434.06   41.20
  -1  -5   3  530.65   37.30
  -1  -5   3  512.85   39.00
  -1  -5   3  540.75   37.40
  -1  -5   3  539.15   41.80
   0   5  -3  697.63   51.89
   0   5  -3  680.13   51.59
   0   5  -3  770.22   53.19
   0  -5   3  691.13   48.20
   0  -5   3  720.43   49.90
   0  -5   3  734.53   51.49
   0  -5   3  724.03   48.40
  -1   5  -3 2286.47  136.39
  -1   5  -3 2107.89  136.39
  -1   5  -3 2169.68  137.09
  -1   5  -3 2114.89  135.89
   1  -5   3 2288.07  130.79
   1  -5   3 2135.69  133.99
   1  -5   3 2233.18  135.19
   1  -5   3 2225.68  136.19
  -2   5  -3  503.95   41.00
  -2   5  -3  496.45   37.50
  -2   5  -3  451.45   38.50
   2  -5   3  514.65   34.30
   2  -5   3  509.65   40.40
   2  -5   3  468.25   37.70
   2  -5   3  504.35   31.70
   2  -5   3  455.25   38.70
   2  -5   3  537.65   41.30
  -3   5  -3  620.94   44.20
  -3   5  -3  550.74   46.00
  -3   5  -3  563.44   40.00
   3  -5   3  447.46   44.70
   3  -5   3  548.45   38.60
   3  -5   3  495.45   42.40
   3  -5   3  500.75   43.70
  -4   5  -3 1514.65  102.69
  -4   5  -3 1590.04  105.29
   4  -5   3 1408.26  106.59
   4  -5   3 1476.15   98.99
   4  -5   3 1745.83  100.09
  -5   5  -3  444.26   42.90
  -5   5  -3  360.06   44.10
   5  -5   3  433.26   51.59
   5  -5   3  396.06   37.00
  -6   5  -3  245.28   39.00
   6  -5   3  275.67   47.60
   6  -5   3  257.47   32.40
  -7   5  -3  722.93   70.99
   7  -5   3  684.03   81.49
   7  -5   3  730.83   62.29
  -8   5  -3   16.50   34.10
   8  -5   3    4.10   25.10
   8  -5   3    2.50   38.50
  -9   5  -3  322.57   59.39
   9  -5   3  330.17   49.60
   9  -5   3  343.07   64.59
   9   4  -3  -43.80   44.80
   8   4  -3  156.08   52.59
   8   4  -3  355.56   48.00
   8   4  -3  265.07   35.70
  -8  -4   3  312.07   45.20
   7   4  -3  104.59   21.40
   7   4  -3   91.79   45.60
   7   4  -3  171.98   34.60
   7   4  -3  120.89   24.00
   6   4  -3  770.22   80.19
   6   4  -3  852.51   58.19
   6   4  -3  759.12   64.09
   6   4  -3  757.82   55.09
  -6  -4   3  804.42   57.09
  -6  -4   3  799.82   58.09
  -6  -4   3  723.13   56.69
   5   4  -3  211.48   30.60
   5   4  -3  176.48   40.40
   5   4  -3  206.68   23.60
   5   4  -3  206.08   21.20
  -5  -4   3  202.38   22.50
  -5  -4   3  199.28   23.30
   4   4  -3  101.49   21.20
   4   4  -3  130.19   14.10
   4   4  -3   89.29   26.80
   4   4  -3  123.49   16.30
  -4  -4   3  115.79   16.00
  -4  -4   3  141.69   17.50
  -4  -4   3  127.19   19.00
   3   4  -3  204.18   18.40
   3   4  -3  201.58   29.40
   3   4  -3  186.18   15.20
   3   4  -3  207.98   25.20
  -3  -4   3  200.48   18.80
  -3  -4   3  215.08   20.90
  -3  -4   3  181.88   16.00
   2   4  -3 2182.08  124.99
   2   4  -3 2041.30  120.99
   2   4  -3 1861.61  124.59
   2   4  -3 2012.70  127.39
  -2  -4   3 1836.52  125.09
  -2  -4   3 2019.10  122.49
  -2  -4   3 2168.68  121.59
  -2  -4   3 1925.61  125.89
   1   4  -3   97.59   18.00
   1   4  -3  129.09   16.20
   1   4  -3  102.49   12.00
   1   4  -3   90.09   11.80
   1   4  -3   92.89   15.90
  -1  -4   3   93.19   17.10
  -1  -4   3  108.19   16.60
  -1  -4   3  117.59   13.10
  -1  -4   3  121.79   13.00
   0   4  -3 7397.26  448.26
   0   4  -3 7370.96  444.96
   0   4  -3 7311.67  447.26
   0   4  -3 7490.45  447.46
   0  -4   3 7765.02  445.36
   0  -4   3 8246.78  447.56
   0  -4   3 7582.44  447.96
   0  -4   3 7456.05  445.16
  -1   4  -3   52.99   11.60
  -1   4  -3   62.59   13.20
  -1   4  -3   39.90   11.60
  -1   4  -3   47.20    9.20
  -1   4  -3   44.70   12.50
   1  -4   3   47.30   10.60
   1  -4   3   48.90   12.20
   1  -4   3   51.09   10.20
   1  -4   3   58.89    7.90
   1  -4   3   41.40   10.00
  -2   4  -3 3677.73  224.28
  -2   4  -3 3817.02  223.48
  -2   4  -3 3886.11  221.38
   2  -4   3 3557.04  224.28
   2  -4   3 3657.43  222.68
   2  -4   3 3889.71  220.58
   2  -4   3 3445.96  224.78
   2  -4   3 3825.42  217.88
   2  -4   3 3600.24  222.78
  -3   4  -3  164.28   24.20
  -3   4  -3  222.38   24.70
  -3   4  -3  192.48   18.70
   3  -4   3  181.88   25.00
   3  -4   3  216.08   15.30
   3  -4   3  174.78   19.50
   3  -4   3  225.08   28.60
  -4   4  -3  519.65   45.00
  -4   4  -3  526.85   42.90
   4  -4   3  526.75   40.00
   4  -4   3  541.95   40.20
   4  -4   3  470.25   49.00
  -5   4  -3  394.86   40.70
  -5   4  -3  456.55   44.40
   5  -4   3  461.25   39.80
   5  -4   3  590.74   54.29
  -6   4  -3  118.09   28.60
   6  -4   3  110.99   39.10
   6  -4   3  120.19   25.00
  -7   4  -3  346.67   50.69
   7  -4   3  442.36   47.60
   7  -4   3  467.75   64.69
  -8   4  -3  438.96   56.49
   8  -4   3  340.77   46.20
   8  -4   3  381.46   62.09
  -9   4  -3   14.10   34.40
   9  -4   3 -122.29   41.70
   9  -4   3   -2.20   28.60
   9   3  -3  563.44   76.99
   8   3  -3   -0.90   39.10
   8   3  -3   20.10   19.50
   8   3  -3   -4.20   19.70
  -8  -3   3   27.00   22.80
   7   3  -3 1222.58   81.19
   7   3  -3 1155.98   84.29
   7   3  -3 1101.99  103.79
   7   3  -3 1222.58   83.79
   7   3  -3 1222.18   89.19
  -7  -3   3 1109.39   88.29
  -7  -3   3 1146.09   82.49
   6   3  -3   99.79   18.10
   6   3  -3  103.69   24.40
   6   3  -3   61.19   37.00
   6   3  -3   68.99   18.40
   6   3  -3   80.29   20.60
  -6  -3   3   67.39   15.10
  -6  -3   3   94.69   18.50
   5   3  -3  337.87   30.50
   5   3  -3  357.76   49.50
   5   3  -3  444.86   34.80
   5   3  -3  368.86   38.10
   5   3  -3  386.96   35.20
  -5  -3   3  372.06   32.20
  -5  -3   3  483.45   32.70
   4   3  -3 1464.75   98.39
   4   3  -3 1585.24   94.89
   4   3  -3 1453.95  104.49
   4   3  -3 1518.45   92.39
  -4  -3   3 1441.76   92.79
  -4  -3   3 1521.25   93.39
   3   3  -3  352.46   23.30
   3   3  -3  304.17   24.50
   3   3  -3  329.87   25.60
   3   3  -3  299.27   28.30
   3   3  -3  363.06   33.80
  -3  -3   3  321.17   23.90
  -3  -3   3  343.27   25.60
   2   3  -3 6467.95  380.26
   2   3  -3 6555.14  378.06
   2   3  -3 6473.45  380.36
   2   3  -3 6508.15  385.16
   2   3  -3 6190.48  383.06
   2   3  -3 6806.92  383.36
  -2  -3   3 6536.65  379.16
  -2  -3   3 6420.16  383.86
  -2  -3   3 6275.57  380.36
   1   3  -3  383.36   22.40
   1   3  -3  295.37   29.80
   1   3  -3  372.06   25.80
   1   3  -3  347.67   28.70
   1   3  -3  429.56   27.30
  -1  -3   3  406.96   27.00
  -1  -3   3  299.07   29.60
  -1  -3   3  373.96   25.00
  -1  -3   3  356.36   29.10
   0   3  -3 2536.95  150.48
   0   3  -3 2391.66  148.29
   0   3  -3 2459.95  149.29
   0   3  -3 2547.05  146.99
   0  -3   3 2473.15  146.49
   0  -3   3 2371.06  149.19
   0  -3   3 2516.65  149.19
   0  -3   3 2379.86  146.79
  -1   3  -3  309.97   23.70
  -1   3  -3  305.27   23.40
  -1   3  -3  293.47   25.40
  -1   3  -3  289.07   25.20
   1  -3   3  300.07   26.30
   1  -3   3  279.17   23.20
   1  -3   3  316.37   24.40
   1  -3   3  319.47   25.20
   1  -3   3  287.07   20.90
   1  -3   3  312.57   21.10
   1  -3   3  285.17   25.80
  -2   3  -3  661.13   41.80
  -2   3  -3  662.23   45.30
  -2   3  -3  638.54   45.90
  -2   3  -3  646.64   46.40
   2  -3   3  643.34   44.70
   2  -3   3  642.64   49.50
   2  -3   3  659.43   40.10
   2  -3   3  677.33   43.50
   2  -3   3  695.13   48.00
  -3   3  -3  207.88   22.40
  -3   3  -3  210.98   25.10
  -3   3  -3  199.68   16.20
   3  -3   3  221.98   25.80
   3  -3   3  217.28   28.20
   3  -3   3  181.98   19.80
   3  -3   3  210.78   17.30
  -4   3  -3 2782.72  179.38
  -4   3  -3 2910.41  177.68
   4  -3   3 2704.03  183.88
   4  -3   3 3073.19  177.58
   4  -3   3 2941.61  173.08
   4  -3   3 2894.41  176.58
  -5   3  -3   14.20   16.80
  -5   3  -3   -7.20   13.10
   5  -3   3   22.40   13.80
   5  -3   3  -14.00   21.80
  -6   3  -3 1257.77   86.59
  -6   3  -3 1191.28   88.69
   6  -3   3 1176.88   85.29
   6  -3   3 1328.67  101.79
  -7   3  -3    9.10   25.90
   7  -3   3   19.50   21.70
   7  -3   3    6.50   35.80
  -8   3  -3   73.59   33.20
   8  -3   3  102.39   43.30
   8  -3   3   85.89   29.20
  -9   3  -3   41.40   36.60
   9  -3   3  124.99   49.60
   9  -3   3  -10.90   28.80
  10   2  -3   26.60   29.10
  10   2  -3   57.99   32.70
   9   2  -3  169.98   33.40
   8   2  -3   26.80   21.20
   8   2  -3    6.50   18.50
   8   2  -3   36.90   41.20
   8   2  -3    3.30   21.80
  -8  -2   3   30.40   39.50
   7   2  -3   91.49   24.90
   7   2  -3   78.59   39.40
   7   2  -3   75.89   20.70
   7   2  -3   49.20   20.80
   7   2  -3   39.30   19.60
  -7  -2   3   72.59   23.30
  -7  -2   3   96.49   25.20
  -7  -2   3   74.19   19.30
   6   2  -3  316.07   30.40
   6   2  -3  295.87   31.20
   6   2  -3  238.68   29.60
   6   2  -3  253.57   46.70
   6   2  -3  271.87   34.80
  -6  -2   3  233.58   29.10
  -6  -2   3  282.07   25.70
   5   2  -3 1533.45  103.19
   5   2  -3 1404.26  112.79
   5   2  -3 1549.84  100.19
   5   2  -3 1554.24   98.59
   5   2  -3 1641.24   99.89
  -5  -2   3 1621.74   97.09
   4   2  -3    3.50    7.90
   4   2  -3   17.10   20.20
   4   2  -3    4.10    8.80
   4   2  -3    0.50    8.50
   4   2  -3    9.70   10.60
  -4  -2   3    9.20    6.90
   3   2  -3 4003.80  239.68
   3   2  -3 4061.59  235.58
   3   2  -3 3966.70  237.28
   3   2  -3 3943.21  243.58
   3   2  -3 4022.90  235.68
  -3  -2   3 3905.31  239.18
  -3  -2   3 3992.80  235.58
   2   2  -3  181.48   14.60
   2   2  -3  162.08   16.30
   2   2  -3  195.78   19.40
   2   2  -3  222.68   24.60
   2   2  -3  179.78   13.80
  -2  -2   3  178.98   19.30
  -2  -2   3  199.48   15.50
  -2  -2   3  159.48   12.90
   1   2  -3 2315.27  137.39
   1   2  -3 2331.27  136.09
   1   2  -3 2078.89  138.09
   1   2  -3 2349.36  133.39
   1   2  -3 2341.87  134.69
  -1  -2   3 2176.08  138.09
  -1  -2   3 2289.57  137.59
  -1  -2   3 2388.26  133.29
  -1  -2   3 2049.49  134.49
   0   2  -3  236.38   22.60
   0   2  -3  169.98   16.00
   0   2  -3  178.18   15.60
   0   2  -3  156.58   18.10
   0  -2   3  192.08   14.40
   0  -2   3  220.18   16.10
   0  -2   3  187.68   18.90
   0  -2   3  173.08   15.70
   0  -2   3  156.38   17.90
  -1   2  -3 1761.12  101.89
  -1   2  -3 1642.34  103.99
  -1   2  -3 1653.63  103.19
  -1   2  -3 1796.42  103.69
   1  -2   3 1697.93  102.19
   1  -2   3 1595.64  106.69
   1  -2   3 1711.43  103.49
   1  -2   3 1688.33  103.99
   1  -2   3 1684.53  103.59
  -2   2  -3 2156.48  127.09
  -2   2  -3 2031.60  127.69
  -2   2  -3 1812.12  126.79
   2  -2   3 1999.10  126.29
   2  -2   3 2175.68  126.59
   2  -2   3 2181.88  123.29
   2  -2   3 2156.98  125.99
   2  -2   3 2105.89  129.79
  -3   2  -3 1297.27   80.59
  -3   2  -3 1246.08   81.89
   3  -2   3 1237.28   78.39
   3  -2   3 1250.97   85.89
   3  -2   3 1290.57   82.49
   3  -2   3 1216.18   79.29
  -4   2  -3  323.37   28.30
  -4   2  -3  269.67   30.60
   4  -2   3  285.87   38.30
   4  -2   3  292.77   27.10
   4  -2   3  290.97   24.60
  -5   2  -3   45.40   17.10
  -5   2  -3   39.10   15.30
   5  -2   3   52.79   15.80
   5  -2   3   -9.50   20.70
   5  -2   3   50.69   11.80
  -6   2  -3  212.98   31.60
  -6   2  -3  226.08   27.60
   6  -2   3  291.27   46.70
   6  -2   3  203.98   29.50
  -7   2  -3   42.30   25.00
   7  -2   3   68.09   38.00
   7  -2   3   69.99   25.50
  -8   2  -3  848.72   77.89
   8  -2   3  945.21   73.79
   8  -2   3  829.72   93.49
  -9   2  -3   50.79   36.00
   9  -2   3  -50.79   42.90
  10   1  -3   43.10   29.80
  10   1  -3   85.99   29.50
   9   1  -3  402.96   49.30
   9   1  -3  308.27   41.20
   8   1  -3   32.10   21.80
   8   1  -3   35.30   21.70
   8   1  -3   54.09   21.00
  -8  -1   3   39.10   38.70
   7   1  -3  871.71   62.89
   7   1  -3  986.70   67.99
   7   1  -3  819.62   62.69
   7   1  -3  744.13   80.79
  -7  -1   3  815.82   65.19
  -7  -1   3  889.11   65.19
  -7  -1   3  714.23   82.89
   6   1  -3  233.08   28.10
   6   1  -3  227.68   30.30
   6   1  -3  221.78   44.30
   6   1  -3  283.17   30.10
   6   1  -3  278.77   31.80
  -6  -1   3  265.17   23.70
  -6  -1   3  259.87   30.70
  -6  -1   3  247.28   30.40
  -6  -1   3  211.98   27.00
   5   1  -3  231.68   38.80
   5   1  -3  297.97   25.80
   5   1  -3  258.77   28.30
   5   1  -3  290.77   26.50
   5   1  -3  230.88   27.60
  -5  -1   3  251.17   21.70
  -5  -1   3  245.68   27.40
  -5  -1   3  289.47   28.70
   4   1  -3  512.45   35.90
   4   1  -3  466.35   48.40
   4   1  -3  497.85   35.80
   4   1  -3  517.85   37.70
   4   1  -3  501.15   39.00
  -4  -1   3  503.65   33.60
  -4  -1   3  519.15   38.40
   3   1  -3  986.30   63.99
   3   1  -3 1011.00   64.89
   3   1  -3 1086.19   73.29
   3   1  -3 1042.70   66.39
  -3  -1   3 1078.79   67.29
  -3  -1   3 1052.29   63.39
   2   1  -3  227.08   16.80
   2   1  -3  245.38   17.80
   2   1  -3  238.48   19.10
   2   1  -3  263.67   25.70
  -2  -1   3  235.58   17.10
  -2  -1   3  222.78   20.70
  -2  -1   3  255.37   21.30
   1   1  -3 2539.85  161.48
   1   1  -3 2720.13  158.58
   1   1  -3 2792.32  160.38
   1   1  -3 2761.02  157.98
   1   1  -3 2836.12  161.58
   1   1  -3 2531.05  158.18
  -1  -1   3 2670.33  160.98
  -1  -1   3 2613.44  158.28
  -1  -1   3 2698.73  160.38
   0   1  -3    2.50    8.90
   0   1  -3   -5.30    7.80
   0   1  -3    9.70    5.80
   0   1  -3    5.60    6.00
   0   1  -3    5.50    5.00
   0  -1   3   -0.40    7.50
   0  -1   3    4.00   10.70
   0  -1   3   -4.80    7.70
   0  -1   3    7.50    6.00
   0  -1   3    4.60    6.60
  -1   1  -3 2027.90  118.09
  -1   1  -3 2036.40  120.79
  -1   1  -3 2008.00  121.79
  -1   1  -3 1984.20  121.49
   1  -1   3 1978.80  125.49
   1  -1   3 1722.73  120.59
   1  -1   3 2145.19  121.09
   1  -1   3 2176.28  123.09
  -2   1  -3 1265.17   83.99
  -2   1  -3 1400.66   83.49
   2  -1   3 1356.96   87.39
   2  -1   3 1318.77   82.89
   2  -1   3 1342.47   81.59
   2  -1   3 1322.37   83.09
   2  -1   3 1410.56   88.29
   2  -1   3 1387.06   84.49
  -3   1  -3 2404.56  138.49
  -3   1  -3 2222.28  139.59
   3  -1   3 2244.38  137.89
   3  -1   3 2330.67  141.49
   3  -1   3 2179.08  138.49
   3  -1   3 2433.16  144.99
   3  -1   3 2150.08  138.39
  -4   1  -3 1566.24  100.79
  -4   1  -3 1610.44   98.89
   4  -1   3 1524.15   99.49
   4  -1   3 1536.65   98.69
   4  -1   3 1602.04  107.39
  -5   1  -3   11.60   13.60
  -5   1  -3   -0.60   11.60
   5  -1   3   25.50   23.70
   5  -1   3    0.90   14.70
   5  -1   3   10.00   10.60
  -6   1  -3 1427.36   93.39
  -6   1  -3 1312.57   89.29
   6  -1   3 1391.16  102.99
   6  -1   3 1303.67   88.79
   6  -1   3 1269.77   91.19
  -7   1  -3  271.17   38.30
   7  -1   3  224.18   48.60
   7  -1   3  241.18   36.20
  -8   1  -3  109.99   33.50
   8  -1   3   34.30   44.10
   9  -1   3   -1.20   42.50
  10   0  -3   98.19   32.60
  10   0  -3   75.39   31.40
 -10   0   3  160.98   37.30
   9   0  -3   27.20   25.50
   9   0  -3  -15.40   20.20
   8   0  -3  619.94   56.29
   8   0  -3  659.73   60.69
  -8   0   3  692.43   80.19
   7   0  -3  135.99   23.50
   7   0  -3  128.09   25.10
   7   0  -3  166.78   28.20
  -7   0   3   44.10   36.90
  -7   0   3  143.09   26.40
   6   0  -3  976.50   69.09
   6   0  -3  971.80   83.89
   6   0  -3 1024.90   68.19
   6   0  -3  995.50   70.89
  -6   0   3  919.91   69.79
  -6   0   3  941.51   85.89
  -6   0   3 1019.60   69.29
   5   0  -3 1628.84  120.09
   5   0  -3 1713.93  109.49
   5   0  -3 1749.92  108.59
   5   0  -3 1753.42  111.09
  -5   0   3 1794.52  104.89
  -5   0   3 1728.43  108.99
  -5   0   3 1846.72  110.79
  -5   0   3 1646.94  110.89
   4   0  -3  301.77   28.30
   4   0  -3  416.86   44.80
   4   0  -3  358.56   27.10
   4   0  -3  359.76   29.80
  -4   0   3  365.26   24.30
  -4   0   3  379.56   28.70
  -4   0   3  386.86   30.50
   3   0  -3 3097.09  186.58
   3   0  -3 3077.09  189.18
   3   0  -3 3210.38  188.48
   3   0  -3 3038.40  194.68
  -3   0   3 3165.68  185.38
  -3   0   3 3293.07  188.88
  -3   0   3 3204.08  189.78
   2   0  -3  135.79    9.70
   2   0  -3  148.39   20.90
   2   0  -3  131.59    9.30
   2   0  -3  115.29   13.50
   2   0  -3  123.59   12.80
   2   0  -3  127.79   12.80
  -2   0   3  138.69   14.60
  -2   0   3  126.99   10.00
  -2   0   3  141.09   16.10
   1   0  -3  348.07   25.70
   1   0  -3  324.47   26.80
   1   0  -3  365.86   24.40
   1   0  -3  344.87   26.10
   1   0  -3  352.76   22.80
   1   0  -3  356.86   21.80
  -1   0   3  357.16   26.90
  -1   0   3  329.67   27.10
  -1   0   3  366.16   23.60
   0   0  -3  409.06   28.70
   0   0  -3  431.96   30.40
   0   0  -3  401.26   30.00
   0   0  -3  411.86   27.60
   0   0   3  420.36   29.80
   0   0   3  404.86   30.50
   0   0   3  400.36   33.20
   0   0   3  432.26   28.20
   0   0   3  427.76   31.90
  -1   0  -3  226.78   20.40
  -1   0  -3  229.98   19.90
  -1   0  -3  240.48   18.80
   1   0   3  243.08   22.30
   1   0   3  255.07   21.40
   1   0   3  215.38   21.60
   1   0   3  254.17   18.70
   1   0   3  248.88   17.50
   1   0   3  233.98   24.20
  -2   0  -3  800.52   46.90
  -2   0  -3  705.33   47.70
   2   0   3  730.83   51.69
   2   0   3  702.93   51.49
   2   0   3  717.13   49.70
   2   0   3  731.53   47.20
   2   0   3  716.53   46.30
  -3   0  -3 1144.19   73.19
  -3   0  -3 1162.48   71.79
   3   0   3 1090.59   73.09
   3   0   3 1171.08   71.59
   3   0   3 1129.49   74.39
   3   0   3 1157.78   79.19
  -4   0  -3  328.57   28.10
  -4   0  -3  275.27   25.60
   4   0   3  255.67   27.80
   4   0   3  309.37   24.70
   4   0   3  293.87   36.70
   4   0   3  257.97   27.10
  -5   0  -3 1181.18   79.99
  -5   0  -3 1214.08   82.59
   5   0   3 1265.27   83.39
   5   0   3 1287.07   83.79
   5   0   3 1235.18   91.79
  -6   0  -3   82.79   20.70
  -6   0  -3   80.69   18.30
   6   0   3   53.69   33.50
   6   0   3   73.19   21.60
   6   0   3   76.29   20.00
  -7   0  -3  497.65   49.90
   7   0   3  609.14   49.70
   7   0   3  402.96   60.69
   8   0   3  169.68   50.89
  -9   0  -3   17.40   33.20
   9   0   3   37.90   46.30
  10  -1  -3  499.35   53.89
  10  -1  -3  339.47   49.10
   9  -1  -3   35.10   25.90
   9  -1  -3   -7.10   22.10
   8  -1  -3    6.90   21.20
   8  -1  -3   -4.60   20.50
  -8   1   3  -25.00   35.80
   7  -1  -3   62.29   18.60
   7  -1  -3   83.39   21.40
   7  -1  -3   64.29   21.40
  -7   1   3   99.09   38.90
   6  -1  -3  608.54   50.79
   6  -1  -3  746.63   54.19
   6  -1  -3  643.24   49.50
  -6   1   3  637.64   71.59
  -6   1   3  635.14   52.09
  -6   1   3  696.53   52.49
   5  -1  -3   51.79   12.70
   5  -1  -3   61.79   15.40
   5  -1  -3   77.99   17.20
  -5   1   3   38.40   14.70
  -5   1   3   52.99    7.00
  -5   1   3   46.00   27.40
  -5   1   3   61.09   16.60
   4  -1  -3 1746.23  101.79
   4  -1  -3 1578.44  102.89
   4  -1  -3 1646.04  103.89
   4  -1  -3 1580.84  110.69
  -4   1   3 1633.34  100.59
  -4   1   3 1686.83  114.39
  -4   1   3 1671.43  104.39
  -4   1   3 1658.23   97.49
  -4   1   3 1639.54  104.09
   3  -1  -3  201.08   19.00
   3  -1  -3  169.48   25.60
   3  -1  -3  224.28   17.00
   3  -1  -3  195.78   18.80
   3  -1  -3  197.08   18.40
  -3   1   3  212.68   30.90
  -3   1   3  218.68   17.60
  -3   1   3  213.78   21.10
   2  -1  -3 1653.93   92.59
   2  -1  -3 1459.35   93.99
   2  -1  -3 1596.04   91.69
   2  -1  -3 1495.05   93.99
   2  -1  -3 1501.95   97.99
   2  -1  -3 1534.45   93.89
  -2   1   3 1484.75  100.39
  -2   1   3 1522.45   97.39
  -2   1   3 1560.04   94.89
   1  -1  -3  401.66   25.50
   1  -1  -3  384.36   27.30
   1  -1  -3  387.66   26.60
  -1   1   3  395.16   33.30
  -1   1   3  384.56   30.80
  -1   1   3  318.07   31.50
   0  -1  -3  180.78   19.10
   0  -1  -3  154.78   15.80
   0  -1  -3  145.79   15.20
   0   1   3  204.18   21.00
   0   1   3  192.38   21.40
   0   1   3  169.38   15.20
   0   1   3  156.88   18.60
  -1  -1  -3 5848.21  359.56
  -1  -1  -3 5791.12  362.46
   1   1   3 6193.68  357.86
   1   1   3 6241.38  362.76
   1   1   3 6375.46  358.06
   1   1   3 5992.60  362.96
   1   1   3 5779.12  361.16
   1   1   3 6491.75  360.06
   1   1   3 6329.17  361.26
  -2  -1  -3  176.38   14.10
  -2  -1  -3  179.58   15.50
  -2  -1  -3  202.78   21.60
   2   1   3  118.79   17.80
   2   1   3  194.98   19.20
   2   1   3  161.38   13.40
   2   1   3  168.18   13.80
   2   1   3  155.48   21.20
   2   1   3  179.08   15.20
  -3  -1  -3 1567.34   96.19
  -3  -1  -3 1558.84   94.59
   3   1   3 1547.55   99.79
   3   1   3 1629.24   95.29
   3   1   3 1567.24   94.49
   3   1   3 1416.56  101.69
  -4  -1  -3  677.63   44.60
  -4  -1  -3  606.14   41.80
   4   1   3  572.64   47.20
   4   1   3  589.84   53.69
   4   1   3  592.14   42.60
  -5  -1  -3   30.20   11.60
  -5  -1  -3   28.60   14.20
   5   1   3   59.29   25.00
   5   1   3   47.60   17.10
  -6  -1  -3  212.08   28.50
   6   1   3  224.68   31.80
   6   1   3  180.68   37.60
   7   1   3  522.85   50.69
   7   1   3  395.96   59.39
  -8  -1  -3   23.10   29.40
   8   1   3    8.60   38.60
  -9  -1  -3  465.45   62.39
   9   1   3  363.36   68.39
  10  -2  -3  110.69   37.00
  10  -2  -3   29.10   28.90
 -10   2   3   89.99   37.40
   9  -2  -3   14.80   28.30
   9  -2  -3    3.00   23.90
  -9   2   3   14.10   28.70
   8  -2  -3  606.14   56.79
   8  -2  -3  692.03   61.99
  -8   2   3  627.24   74.99
   7  -2  -3  113.39   22.30
   7  -2  -3   95.49   22.70
   7  -2  -3  134.39   25.80
  -7   2   3   90.49   37.90
   6  -2  -3 2215.68  127.69
   6  -2  -3 2006.00  128.19
   6  -2  -3 2015.00  129.09
  -6   2   3 2026.50  129.29
  -6   2   3 1647.14  134.29
   5  -2  -3   71.79   15.60
   5  -2  -3   47.60   15.90
   5  -2  -3   58.69   17.00
  -5   2   3   90.79   20.90
  -5   2   3   70.89   29.90
  -5   2   3   62.29   17.00
   4  -2  -3  294.67   25.90
   4  -2  -3  345.97   26.70
   4  -2  -3  247.48   25.70
  -4   2   3  313.17   39.60
  -4   2   3  279.87   31.40
  -4   2   3  274.07   28.00
   3  -2  -3  139.69   15.60
   3  -2  -3  166.98   18.40
   3  -2  -3  125.99   15.80
   3  -2  -3  178.98   18.40
   3  -2  -3  134.49   15.50
  -3   2   3  155.58   22.50
  -3   2   3  126.59   13.70
  -3   2   3  144.49   16.60
  -3   2   3  110.99   24.70
   2  -2  -3 2963.70  174.58
   2  -2  -3 3058.89  173.08
   2  -2  -3 2948.00  173.58
   2  -2  -3 2871.41  172.28
   2  -2  -3 2749.12  173.68
  -2   2   3 2854.31  173.68
  -2   2   3 3060.29  172.98
  -2   2   3 2575.64  178.58
  -2   2   3 3016.90  177.48
   1  -2  -3  140.29   15.80
   1  -2  -3  164.18   15.40
   1  -2  -3  156.08   14.30
   1  -2  -3  184.08   18.30
  -1   2   3  169.28   21.60
  -1   2   3  157.68   17.20
  -1   2   3  189.28   24.00
   0  -2  -3 7737.73  457.35
   0  -2  -3 7062.29  458.35
   0  -2  -3 7910.01  456.25
   0   2   3 7788.72  456.65
   0   2   3 8195.68  459.45
   0   2   3 7844.22  458.75
   0   2   3 7839.72  458.55
   0   2   3 7857.21  459.45
  -1  -2  -3    8.50    5.50
  -1  -2  -3   16.20   12.00
   1   2   3   12.80   10.50
   1   2   3   -1.10    8.50
   1   2   3   18.10   10.20
   1   2   3   13.40    8.00
   1   2   3   25.00   10.80
   1   2   3   20.30    2.70
  -2  -2  -3 4748.23  272.67
  -2  -2  -3 4529.55  280.37
  -2  -2  -3 4718.63  274.17
   2   2   3 4931.51  277.37
   2   2   3 4509.05  279.77
   2   2   3 4548.75  275.47
   2   2   3 4684.23  277.87
   2   2   3 4572.24  279.57
  -3  -2  -3   48.70   15.70
  -3  -2  -3   41.80    7.40
  -3  -2  -3   55.49   10.10
   3   2   3   58.49   19.90
   3   2   3   36.30   13.20
   3   2   3   64.89   12.30
  -4  -2  -3  320.27   24.30
  -4  -2  -3  263.67   32.80
  -4  -2  -3  313.27   26.40
   4   2   3  300.77   38.10
   4   2   3  350.96   36.70
   4   2   3  318.77   29.20
  -5  -2  -3 1356.76   90.19
   5   2   3 1293.07   89.79
   5   2   3 1150.78   93.59
  -6  -2  -3   54.69   25.20
   6   2   3   -7.80   27.80
   6   2   3   43.50   20.80
  -7  -2  -3  687.03   64.29
   7   2   3  737.23   63.89
   7   2   3  560.84   71.39
  -8  -2  -3   24.50   32.10
   8   2   3    8.20   25.00
   8   2   3   30.50   41.80
  -9  -2  -3  -56.29   32.60
   9   2   3   27.40   49.10
   9  -3  -3  397.16   52.39
   9  -3  -3  459.95   52.89
  -9   3   3  396.86   55.59
   8  -3  -3   52.19   24.80
   8  -3  -3   13.20   22.50
  -8   3   3   -5.70   39.30
   7  -3  -3  596.74   52.89
   7  -3  -3  530.25   51.79
   7  -3  -3  514.95   48.70
  -7   3   3  604.04   69.39
   6  -3  -3  314.47   35.10
   6  -3  -3  309.97   35.00
   6  -3  -3  341.47   33.50
  -6   3   3  247.88   32.40
  -6   3   3  325.17   49.50
   5  -3  -3  479.05   39.30
   5  -3  -3  459.35   39.50
   5  -3  -3  401.86   37.80
  -5   3   3  447.16   43.40
  -5   3   3  448.16   53.69
  -5   3   3  439.46   38.90
   4  -3  -3 2413.26  150.18
   4  -3  -3 2380.36  149.99
   4  -3  -3 2481.95  150.98
   4  -3  -3 2801.52  151.48
  -4   3   3 2300.07  151.78
  -4   3   3 2312.87  158.58
  -4   3   3 2394.36  151.08
   3  -3  -3   -1.20    8.10
   3  -3  -3    6.50    9.20
   3  -3  -3   -3.20    7.80
   3  -3  -3   13.00    9.10
   3  -3  -3    3.00    8.10
  -3   3   3   -9.50   14.40
  -3   3   3   -3.70    8.90
  -3   3   3   -2.00   19.50
   2  -3  -3 7511.25  426.16
   2  -3  -3 7622.24  421.66
   2  -3  -3 6911.81  425.96
   2  -3  -3 7209.08  425.16
   2  -3  -3 7252.67  427.26
  -2   3   3 7107.99  432.06
  -2   3   3 7111.79  426.76
  -2   3   3 7083.39  425.46
   1  -3  -3  112.59   11.60
   1  -3  -3  105.09   14.20
   1  -3  -3  130.39   16.30
   1  -3  -3   94.49    9.20
   1  -3  -3   85.89   13.60
  -1   3   3  138.49   23.00
  -1   3   3  103.99   11.10
  -1   3   3   76.19   13.70
  -1   3   3  100.29   17.00
   0  -3  -3 1886.51  115.29
   0  -3  -3 1795.92  119.29
   0  -3  -3 1951.60  118.59
   0  -3  -3 1996.20  114.89
   0   3   3 1961.30  119.49
   0   3   3 1936.41  121.29
   0   3   3 1909.41  118.99
   0   3   3 1909.31  113.49
  -1  -3  -3  153.58   19.20
  -1  -3  -3  133.59   20.10
   1   3   3  114.49   18.50
   1   3   3  158.28   21.00
   1   3   3  138.09   18.80
   1   3   3  151.98   20.40
   1   3   3  131.19   18.70
  -2  -3  -3 1064.69   72.69
  -2  -3  -3  954.90   70.19
   2   3   3 1165.98   70.19
   2   3   3 1052.49   68.89
   2   3   3 1011.00   70.39
   2   3   3  917.81   66.69
   2   3   3 1074.89   71.49
  -3  -3  -3    9.80   15.50
   3   3   3   28.70   12.00
   3   3   3    6.30   16.70
   3   3   3   -1.70   13.30
  -4  -3  -3 1512.35  103.29
   4   3   3 1533.15  103.49
   4   3   3 1573.44   98.79
   4   3   3 1416.26  104.69
  -5  -3  -3  -21.90   19.70
   5   3   3  -16.20   22.30
   5   3   3   18.00   18.40
  -6  -3  -3  626.34   62.89
   6   3   3  633.04   70.49
   6   3   3  690.93   61.59
  -7  -3  -3   -0.40   28.80
   7   3   3  -43.90   31.80
   7   3   3   18.50   25.40
  -8  -3  -3   43.90   35.30
   8   3   3   13.40   27.90
   8   3   3  -31.00   39.80
  -9  -3  -3  139.99   61.69
  -9  -3  -3  169.58   50.49
   9  -4  -3  239.58   42.30
   9  -4  -3  192.08   35.50
  -9   4   3  203.78   43.40
   8  -4  -3  155.08   32.30
   8  -4  -3  141.59   31.90
  -8   4   3  180.08   51.79
  -8   4   3   98.79   31.80
   7  -4  -3   35.50   20.80
   7  -4  -3  -15.30   18.00
  -7   4   3   -8.30   33.40
   6  -4  -3  698.13   53.59
   6  -4  -3  565.44   51.99
   6  -4  -3  628.94   54.29
  -6   4   3  642.34   54.59
  -6   4   3  723.43   71.69
   5  -4  -3  458.25   38.40
   5  -4  -3  446.16   38.70
   5  -4  -3  412.96   40.60
   5  -4  -3  458.75   41.00
  -5   4   3  379.86   39.40
  -5   4   3  437.56   53.39
   4  -4  -3   85.49   17.40
   4  -4  -3   85.99   18.80
   4  -4  -3   97.99   17.50
   4  -4  -3   93.49   17.40
   4  -4  -3  105.09   19.70
  -4   4   3  118.79   20.90
  -4   4   3  117.59   32.10
  -4   4   3  104.79   18.90
   3  -4  -3 1878.11  113.19
   3  -4  -3 1587.34  113.69
   3  -4  -3 1944.71  114.99
   3  -4  -3 1826.52  115.69
   3  -4  -3 1771.62  113.69
  -3   4   3 1797.82  114.19
  -3   4   3 1943.31  115.79
  -3   4   3 1865.11  112.09
  -3   4   3 1844.82  122.99
   2  -4  -3 1260.37   79.69
   2  -4  -3 1270.57   75.09
   2  -4  -3 1227.58   81.19
   2  -4  -3 1194.48   77.69
   2  -4  -3 1291.67   80.89
  -2   4   3 1186.48   78.99
  -2   4   3 1342.97   82.29
  -2   4   3 1272.67   78.99
  -2   4   3 1224.98   87.79
   1  -4  -3  847.12   55.59
   1  -4  -3  918.81   60.29
   1  -4  -3  899.71   58.99
   1  -4  -3  870.11   55.79
   1  -4  -3  901.41   61.09
  -1   4   3  920.71   66.39
  -1   4   3  896.61   59.79
  -1   4   3  887.71   60.99
  -1   4   3  959.70   56.99
   0  -4  -3 2069.89  128.39
   0  -4  -3 2023.10  121.19
   0  -4  -3 2053.89  123.19
   0  -4  -3 2037.00  127.19
   0   4   3 1996.80  127.09
   0   4   3 1949.41  126.99
   0   4   3 2002.50  130.19
   0   4   3 2156.58  120.99
  -1  -4  -3  132.39   12.50
  -1  -4  -3  127.49   22.30
  -1  -4  -3  138.89   20.70
  -1  -4  -3  140.59   16.00
   1   4   3  142.19   21.10
   1   4   3  136.79   23.80
   1   4   3  133.49   21.40
   1   4   3  142.29   21.70
  -2  -4  -3 1326.17   80.39
  -2  -4  -3 1061.39   78.19
  -2  -4  -3 1167.48   73.89
   2   4   3 1031.20   76.99
   2   4   3 1002.70   75.09
   2   4   3 1141.99   78.89
   2   4   3 1255.57   78.89
  -3  -4  -3  391.56   32.50
  -3  -4  -3  348.57   40.40
  -3  -4  -3  423.36   40.10
   3   4   3  385.36   34.50
   3   4   3  373.36   38.80
   3   4   3  328.27   40.00
  -4  -4  -3  199.18   32.70
  -4  -4  -3  217.98   25.80
  -4  -4  -3  221.58   33.00
   4   4   3  221.38   33.90
   4   4   3  273.57   31.40
   4   4   3  240.88   37.30
  -5  -4  -3   24.80   25.30
  -5  -4  -3   14.30   23.90
   5   4   3   45.10   22.30
   5   4   3   -0.90   25.90
  -6  -4  -3   86.99   31.00
  -6  -4  -3  121.59   33.60
   6   4   3  136.89   39.20
   6   4   3  164.48   33.30
  -7  -4  -3  105.79   38.00
  -7  -4  -3   29.60   31.80
   7   4   3   20.00   39.80
   7   4   3   49.20   31.50
  -8  -4  -3  488.75   65.99
  -8  -4  -3  386.46   59.19
   8   4   3  592.74   67.19
   8   4   3  396.86   69.59
   9  -5  -3  216.48   39.50
   9  -5  -3  157.18   39.70
  -9   5   3  253.57   49.60
   8  -5  -3    6.10   25.40
   8  -5  -3   10.10   22.60
  -8   5   3   18.30   28.90
   7  -5  -3  870.81   70.39
   7  -5  -3  915.81   71.89
  -7   5   3  952.00   91.09
   6  -5  -3   36.10   19.70
   6  -5  -3   -6.70   16.70
   6  -5  -3    9.20   16.10
  -6   5   3    3.10   31.50
   5  -5  -3  387.66   39.40
   5  -5  -3  288.37   32.60
   5  -5  -3  277.77   34.10
   5  -5  -3  249.78   30.60
  -5   5   3  328.67   35.00
  -5   5   3  305.67   46.70
   4  -5  -3   49.99   18.70
   4  -5  -3   89.79   16.70
   4  -5  -3   76.29   18.00
   4  -5  -3  100.19   18.30
   4  -5  -3   89.79   20.00
  -4   5   3   91.29   18.70
  -4   5   3  110.79   19.20
  -4   5   3   86.09   30.40
   3  -5  -3   83.29   16.20
   3  -5  -3   74.49   18.50
   3  -5  -3   88.39    9.80
   3  -5  -3   82.29   17.60
   3  -5  -3   70.39   16.80
   3  -5  -3  104.89   15.50
  -3   5   3  112.99   19.10
  -3   5   3   83.09   15.70
  -3   5   3  106.29   32.00
   2  -5  -3  223.78   24.50
   2  -5  -3  250.07   18.90
   2  -5  -3  262.17   28.10
   2  -5  -3  243.68   20.90
   2  -5  -3  259.87   27.60
  -2   5   3  259.87   38.00
  -2   5   3  242.78   27.80
  -2   5   3  216.78   22.60
  -2   5   3  265.77   24.20
   1  -5  -3  880.81   57.39
   1  -5  -3  814.32   53.99
   1  -5  -3  884.61   60.89
   1  -5  -3  815.72   59.39
   1  -5  -3  827.12   52.79
  -1   5   3  852.61   60.09
  -1   5   3  881.81   68.19
  -1   5   3  816.32   57.59
  -1   5   3  884.61   54.89
   0  -5  -3   28.10   15.60
   0  -5  -3   43.60   14.50
   0  -5  -3   18.60    7.90
   0   5   3   19.20   12.40
   0   5   3   38.30    9.20
   0   5   3   40.00    7.30
   0   5   3   20.60   19.00
   0   5   3   33.10   15.50
  -1  -5  -3 1765.92  110.19
  -1  -5  -3 1872.41  115.89
  -1  -5  -3 1842.42  115.99
   1   5   3 1630.34  115.69
   1   5   3 1668.43  114.49
   1   5   3 1877.21  118.39
   1   5   3 1820.82  115.29
  -2  -5  -3  594.64   51.79
  -2  -5  -3  598.24   49.90
  -2  -5  -3  605.54   44.60
   2   5   3  700.23   52.89
   2   5   3  548.65   48.50
   2   5   3  551.24   48.20
  -3  -5  -3  838.82   61.39
  -3  -5  -3  599.54   58.19
  -3  -5  -3  746.53   53.59
   3   5   3  712.73   59.79
   3   5   3  799.22   58.39
  -4  -5  -3 1601.34  114.19
  -4  -5  -3 1876.51  116.79
  -4  -5  -3 1617.14  107.49
   4   5   3 1604.14  114.49
   4   5   3 1748.63  110.69
   4   5   3 1422.56  114.89
  -5  -5  -3    5.80   23.50
  -5  -5  -3   13.50   25.90
   5   5   3   24.00   22.50
   5   5   3  -15.30   27.60
  -6  -5  -3  855.31   75.79
  -6  -5  -3  790.62   71.99
   6   5   3  627.44   76.99
   6   5   3  773.92   72.39
  -7  -5  -3   52.69   36.30
  -7  -5  -3   37.30   34.20
   7   5   3   48.50   31.10
   7   5   3   29.80   45.40
  -8  -5  -3   98.39   43.60
   8   5   3  137.99   43.30
   9  -6  -3    5.90   27.70
   9  -6  -3   11.00   29.10
  -9   6   3   48.60   35.80
   8  -6  -3  102.79   32.60
   8  -6  -3  175.98   36.20
  -8   6   3  281.77   44.70
   7  -6  -3   16.20   23.40
   7  -6  -3   11.80   22.00
  -7   6   3   11.60   39.80
  -7   6   3   15.20   26.20
   6  -6  -3  276.77   35.10
   6  -6  -3  284.37   40.30
   6  -6  -3  327.37   38.50
  -6   6   3  340.57   53.79
  -6   6   3  274.97   41.50
   5  -6  -3  561.84   48.20
   5  -6  -3  612.34   52.89
   5  -6  -3  534.85   48.90
   5  -6  -3  576.64   52.59
  -5   6   3  653.83   71.29
  -5   6   3  638.44   52.09
   4  -6  -3   61.99   14.90
   4  -6  -3   64.59   22.10
   4  -6  -3   75.59   18.00
   4  -6  -3   80.59   21.40
   4  -6  -3   91.09   21.60
  -4   6   3   79.19   36.20
  -4   6   3   91.59   17.80
  -4   6   3   88.99   19.60
   3  -6  -3 3018.10  179.98
   3  -6  -3 2911.21  177.48
   3  -6  -3 2928.71  182.98
   3  -6  -3 2813.12  182.28
  -3   6   3 3091.49  191.88
  -3   6   3 2941.21  180.08
  -3   6   3 2850.31  179.78
   2  -6  -3    8.70   11.00
   2  -6  -3    5.90    7.50
   2  -6  -3    0.00    6.40
   2  -6  -3   10.30   14.20
   2  -6  -3   13.70   12.70
  -2   6   3   19.80   24.70
  -2   6   3   10.70    9.40
  -2   6   3  -12.10   13.20
  -2   6   3    8.90    9.40
  -2   6   3   -5.30    9.70
   1  -6  -3 1570.54  102.49
   1  -6  -3 1501.15  105.89
   1  -6  -3 1562.54  105.99
   1  -6  -3 1632.94  100.19
  -1   6   3 1669.93  100.79
  -1   6   3 1699.63  100.19
  -1   6   3 1573.94  103.39
  -1   6   3 1660.33  106.19
  -1   6   3 1711.03  115.09
   0  -6  -3  155.88   20.10
   0  -6  -3  149.39   24.60
   0  -6  -3  172.98   26.30
   0  -6  -3  151.98   17.80
   0   6   3  129.89   29.10
   0   6   3  136.49   21.40
   0   6   3  156.18   31.10
   0   6   3  155.08   25.10
   0   6   3  120.39   13.10
  -1  -6  -3   23.00   15.80
  -1  -6  -3    7.80   17.20
  -1  -6  -3    1.50    9.60
   1   6   3   -4.70   13.60
   1   6   3   -2.10   19.40
   1   6   3  -25.60   20.00
  -2  -6  -3  321.47   39.50
  -2  -6  -3  315.27   30.90
  -2  -6  -3  259.87   37.10
   2   6   3  344.07   39.70
   2   6   3  353.66   42.30
   2   6   3  289.67   37.00
  -3  -6  -3  256.27   28.10
  -3  -6  -3  246.78   37.40
  -3  -6  -3  197.28   34.50
   3   6   3  293.27   36.90
   3   6   3  174.08   31.50
  -4  -6  -3  102.29   29.50
  -4  -6  -3  191.98   34.90
   4   6   3  102.09   28.60
   4   6   3  119.79   26.80
  -5  -6  -3  533.95   63.99
  -5  -6  -3  669.43   65.39
   5   6   3  718.53   66.59
  -6  -6  -3   34.80   32.00
  -6  -6  -3  -21.70   28.50
   6   6   3  -12.80   28.20
  -7  -6  -3  250.97   48.50
   7   6   3  312.07   51.79
   8  -7  -3    4.80   26.20
   8  -7  -3   38.20   26.90
  -8   7   3   90.49   36.00
   7  -7  -3  248.58   38.00
   7  -7  -3  217.08   35.10
  -7   7   3  169.18   50.59
  -7   7   3  205.38   43.30
   6  -7  -3  274.37   41.40
   6  -7  -3  226.58   34.30
   6  -7  -3  336.77   38.80
  -6   7   3  299.97   57.09
  -6   7   3  355.06   47.40
   5  -7  -3  268.67   34.70
   5  -7  -3  308.57   41.40
   5  -7  -3  316.67   34.70
   5  -7  -3  343.07   42.00
  -5   7   3  335.97   41.90
  -5   7   3  379.96   56.49
   4  -7  -3  311.77   42.70
   4  -7  -3  347.27   37.50
   4  -7  -3  463.95   47.30
   4  -7  -3  414.96   35.50
   4  -7  -3  307.87   40.20
  -4   7   3  434.16   41.00
  -4   7   3  358.36   53.89
  -4   7   3  403.86   40.10
   3  -7  -3  125.89   20.70
   3  -7  -3   96.49   24.40
   3  -7  -3  127.49   24.80
  -3   7   3  129.79   21.80
  -3   7   3  115.69   22.30
  -3   7   3  161.48   23.70
  -3   7   3  170.18   41.50
   2  -7  -3  178.18   19.70
   2  -7  -3  302.17   35.80
   2  -7  -3  204.48   24.80
   2  -7  -3  225.08   30.20
  -2   7   3  217.98   24.30
  -2   7   3  219.68   41.20
  -2   7   3  189.58   23.60
  -2   7   3  226.48   28.90
   1  -7  -3  156.58   26.30
   1  -7  -3  162.58   18.70
   1  -7  -3  148.59   26.10
   1  -7  -3  153.88   20.60
  -1   7   3  151.28   24.80
  -1   7   3  160.78   35.30
  -1   7   3  147.19   21.60
  -1   7   3  128.49   18.60
   0  -7  -3   64.29   15.50
   0  -7  -3   83.89   21.70
   0  -7  -3   56.39   21.10
   0  -7  -3   60.69   13.20
   0   7   3  111.19   30.20
   0   7   3   67.79   27.20
   0   7   3   51.39   18.30
  -1  -7  -3 2571.34  165.98
  -1  -7  -3 2624.64  164.48
  -1  -7  -3 2482.35  158.48
   1   7   3 2628.24  171.18
   1   7   3 2552.04  164.08
  -2  -7  -3    9.50   21.50
  -2  -7  -3   14.90   12.60
  -2  -7  -3   16.30   21.00
   2   7   3   17.40   24.10
   2   7   3   18.60   19.40
   2   7   3   17.10   20.20
  -3  -7  -3 1478.95  109.89
  -3  -7  -3 1553.84  111.79
   3   7   3 1652.43  110.99
   3   7   3 1544.55  111.89
  -4  -7  -3   14.80   26.70
  -4  -7  -3   10.50   24.70
   4   7   3    5.50   26.10
  -5  -7  -3  -15.10   26.30
  -5  -7  -3   27.20   34.60
   5   7   3    0.50   27.60
  -6  -7  -3  -33.20   30.90
   6   7   3    4.80   34.00
  -7  -7  -3  201.68   48.50
   7   7   3  280.97   49.90
   8  -8  -3  490.35   55.89
  -8   8   3  474.15   65.59
   7  -8  -3   59.89   26.90
   7  -8  -3   12.20   24.40
  -7   8   3   54.79   34.60
  -7   8   3  122.49   49.50
   6  -8  -3  608.24   65.79
   6  -8  -3  544.25   57.59
  -6   8   3  667.53   63.49
  -6   8   3  645.14   78.89
   5  -8  -3   18.90   17.90
   5  -8  -3  -15.20   24.60
   5  -8  -3   -0.40   23.80
  -5   8   3    6.80   23.70
  -5   8   3  -16.20   38.90
   4  -8  -3   95.19   26.20
   4  -8  -3  177.58   26.20
   4  -8  -3  171.58   33.60
   4  -8  -3   85.99   30.20
  -4   8   3  212.58   49.40
  -4   8   3  100.99   25.00
  -4   8   3  191.18   29.90
   3  -8  -3  266.17   30.40
   3  -8  -3  299.67   41.70
   3  -8  -3  251.67   34.50
  -3   8   3  319.27   34.70
  -3   8   3  318.27   54.09
  -3   8   3  234.28   31.20
   2  -8  -3  184.78   29.80
   2  -8  -3  207.28   26.00
   2  -8  -3  362.96   42.20
  -2   8   3  227.38   48.30
   1  -8  -3  336.47   37.60
   1  -8  -3  397.16   43.50
   1  -8  -3  300.97   31.00
   1  -8  -3  352.26   30.10
  -1   8   3  252.67   31.30
  -1   8   3  367.86   51.79
  -1   8   3  261.37   46.80
   0  -8  -3 1051.09   77.09
   0  -8  -3 1065.59   79.49
   0  -8  -3 1097.99   70.79
   0  -8  -3 1040.10   70.19
   0   8   3  810.02   83.29
   0   8   3 1029.00   89.09
   0   8   3 1028.50   75.09
  -1  -8  -3  -12.80   11.50
  -1  -8  -3   11.90   19.80
  -1  -8  -3   -6.00   21.80
   1   8   3    9.20   17.50
   1   8   3  -42.60   23.10
   1   8   3  -16.50   24.10
  -2  -8  -3  656.13   58.49
  -2  -8  -3  526.75   59.49
   2   8   3  631.64   58.69
   2   8   3  657.63   67.69
   2   8   3  491.65   59.39
  -3  -8  -3  215.18   38.50
  -3  -8  -3  168.78   34.10
   3   8   3  216.48   38.00
   3   8   3  141.29   36.20
  -4  -8  -3  103.29   32.50
  -4  -8  -3  106.19   35.30
   4   8   3  118.19   33.80
  -5  -8  -3  710.03   75.79
   5   8   3  605.44   71.09
  -6  -8  -3   28.70   34.60
   6   8   3   -9.60   36.10
   7  -9  -3   65.99   28.50
  -7   9   3  163.48   43.80
  -7   9   3  221.88   55.49
   6  -9  -3   86.89   26.70
   6  -9  -3  136.49   40.30
  -6   9   3  193.98   51.29
  -6   9   3   56.09   33.30
   5  -9  -3   29.80   20.70
   5  -9  -3   64.89   34.40
  -5   9   3   27.20   27.00
  -5   9   3   48.90   44.60
   4  -9  -3  668.03   73.59
   4  -9  -3  901.01   75.79
   4  -9  -3  842.42   62.69
  -4   9   3  814.72   85.29
   3  -9  -3    2.10   22.20
   3  -9  -3   -1.80   14.60
   3  -9  -3  -17.00   23.30
  -3   9   3  -62.19   32.70
   2  -9  -3 1078.09   76.39
   2  -9  -3 1179.08   90.39
   2  -9  -3 1074.19   83.89
  -2   9   3 1210.48   99.99
   1  -9  -3   76.99   28.00
   1  -9  -3   88.39   24.20
  -1   9   3   78.29   40.90
  -1   9   3   48.00   35.00
   0  -9  -3  350.86   35.50
   0  -9  -3  360.26   47.00
   0  -9  -3  355.56   42.50
   0   9   3  338.07   52.69
   0   9   3  383.46   60.69
   0   9   3  363.26   41.90
  -1  -9  -3  351.66   47.10
  -1  -9  -3  296.87   38.90
   1   9   3  316.27   40.90
   1   9   3  326.97   56.39
   1   9   3  203.88   43.30
  -2  -9  -3   39.00   25.80
  -2  -9  -3   45.80   28.90
   2   9   3   22.10   26.40
   2   9   3   16.10   24.80
   2   9   3   -6.20   29.80
  -3  -9  -3  151.48   34.30
  -3  -9  -3  268.37   47.10
   3   9   3  119.49   35.40
   3   9   3  187.58   38.30
  -4  -9  -3  358.16   53.39
   4   9   3  289.57   50.09
  -5  -9  -3   30.70   37.80
   5   9   3  -57.39   31.30
  -7  10   3  -27.30   43.30
   6 -10  -3  341.37   57.09
  -6  10   3  341.77   65.09
   5 -10  -3   46.40   33.60
  -5  10   3   22.00   41.40
   4 -10  -3   52.69   33.70
   4 -10  -3  -28.40   32.30
  -4  10   3   18.50   45.90
   3 -10  -3  137.49   38.50
   3 -10  -3   59.49   39.80
   3 -10  -3  101.59   30.50
  -3  10   3  115.59   46.30
   2 -10  -3  142.89   31.70
   2 -10  -3   67.29   32.90
  -2  10   3   91.89   49.00
  -2  10   3   84.29   44.60
   1 -10  -3   70.59   32.20
   1 -10  -3   47.50   24.90
  -1  10   3   99.29   46.00
  -1  10   3   60.29   44.60
   0 -10  -3  563.64   53.49
   0 -10  -3  502.45   60.59
   0  10   3  688.83   82.29
   0  10   3  371.16   60.69
  -1 -10  -3   63.19   28.50
  -1 -10  -3   66.29   35.90
   1  10   3   43.60   41.40
   1  10   3   78.19   37.30
   1  10   3   55.39   27.90
  -2 -10  -3  277.97   64.09
  -2 -10  -3  366.66   54.49
   2  10   3  415.16   58.09
   2  10   3  479.05   57.39
  -3 -10  -3   27.40   34.00
   3  10   3    6.50   30.90
  -4 -10  -3   94.29   41.00
   4  10   3   10.90   34.00
  -5 -10  -3   51.89   52.29
   5  10   3  181.08   64.69
   5 -11  -3  192.98   45.00
  -5  11   3  279.27   60.09
   4 -11  -3   54.29   36.10
  -4  11   3   97.69   49.60
   3 -11  -3  -41.70   36.10
   3 -11  -3   -6.60   33.50
  -3  11   3   43.90   47.10
  -3  11   3   47.90   47.80
   2 -11  -3  136.99   34.50
   2 -11  -3  192.28   44.40
  -2  11   3   71.09   47.80
  -2  11   3  245.28   62.79
   1 -11  -3  124.79   43.00
   1 -11  -3  124.49   31.90
  -1  11   3  144.79   53.69
  -1  11   3  142.59   46.80
   0 -11  -3   62.29   27.90
   0 -11  -3   23.10   34.10
   0  11   3   38.60   36.80
   0  11   3   38.30   47.10
  -1 -11  -3  104.29   39.70
   1  11   3  179.28   42.00
   1  11   3  260.87   61.19
  -2 -11  -3   11.40   34.70
   2  11   3   -0.80   31.30
   2  11   3  -21.40   29.00
  -3 -11  -3  147.69   44.10
   3  11   3  128.09   40.30
   4 -12  -3   69.99   41.80
  -4  12   3   60.19   56.99
  -4  12   3  -24.30   50.99
   3 -12  -3  817.62   83.59
  -3  12   3  624.34   87.19
  -3  12   3  570.74   89.79
   2 -12  -3   11.20   35.50
   2 -12  -3   37.30   27.50
  -2  12   3   41.20   47.50
  -2  12   3   12.80   41.20
   1 -12  -3  430.26   62.19
  -1  12   3  388.76   70.99
  -1  12   3  435.26   71.99
   0 -12  -3  -45.20   33.50
   0  12   3   88.39   53.99
   0  12   3   57.29   41.00
  -1 -12  -3   15.60   38.60
   1  12   3   62.99   35.90
  -2 -12  -3  167.48   69.09
   2  13  -4  409.66   71.19
  -2 -13   4  336.87   54.89
   1  13  -4  111.59   44.10
  -1 -13   4  233.88   40.90
   0  13  -4   19.80   30.70
   0 -13   4   -3.80   25.90
  -1  13  -4  137.19   43.30
   1 -13   4  156.58   36.70
   1 -13   4   47.10   42.10
  -2  13  -4  412.16   62.79
   2 -13   4  405.76   62.89
   2 -13   4  374.86   53.39
  -3  13  -4   33.50   40.80
   3 -13   4   96.19   35.80
   3 -13   4  -39.70   52.59
   4  12  -4   34.50   45.60
  -4 -12   4   28.10   35.10
   3  12  -4  403.26   67.59
  -3 -12   4  519.35   65.19
   2  12  -4   85.69   41.20
  -2 -12   4   73.89   36.90
  -2 -12   4   66.29   29.90
   1  12  -4  178.98   49.40
  -1 -12   4  206.38   43.10
  -1 -12   4  151.98   34.90
   0  12  -4  134.29   39.80
   0 -12   4  140.49   31.00
  -1  12  -4  -18.40   26.40
   1 -12   4   12.30   25.10
   1 -12   4  -16.10   35.20
  -2  12  -4  178.58   43.90
   2 -12   4  183.18   37.10
   2 -12   4  165.38   47.30
  -3  12  -4  131.09   40.40
   3 -12   4   48.90   31.90
   3 -12   4   68.09   40.60
  -4  12  -4   64.29   35.30
  -4  12  -4  -41.80   39.60
   4 -12   4   34.50   40.20
   4 -12   4   59.39   33.10
  -5  12  -4   -6.10   44.40
  -5  12  -4   48.40   39.30
   5  11  -4   58.09   47.70
  -5 -11   4   95.79   37.50
   4  11  -4   19.70   37.20
  -4 -11   4   17.70   31.10
   3  11  -4   22.20   35.10
  -3 -11   4   75.89   33.10
   2  11  -4   49.00   35.80
  -2 -11   4    7.60   23.10
  -2 -11   4   24.80   31.00
   1  11  -4  623.04   72.29
  -1 -11   4  575.24   67.59
  -1 -11   4  654.53   59.09
   0  11  -4   33.70   30.80
   0 -11   4   37.60   26.40
   0 -11   4   46.30   23.60
  -1  11  -4  672.03   76.09
   1 -11   4  780.42   66.29
  -2  11  -4   36.60   34.50
  -2  11  -4   -2.20   28.10
   2 -11   4   26.10   26.40
   2 -11   4   37.20   35.00
  -3  11  -4   25.70   37.50
  -3  11  -4   20.70   30.40
   3 -11   4   58.99   29.40
   3 -11   4   58.09   36.10
  -4  11  -4   33.50   39.60
  -4  11  -4   12.80   31.80
   4 -11   4   32.40   29.30
   4 -11   4   30.20   41.50
  -5  11  -4   20.00   40.60
  -5  11  -4    9.20   34.20
   5 -11   4   47.50   41.00
  -6  11  -4   99.69   50.99
   6 -11   4  170.08   80.59
   6  10  -4  277.77   68.89
   6  10  -4  414.06   61.99
  -6 -10   4  375.06   62.49
   5  10  -4  172.18   50.69
   5  10  -4  272.87   48.70
  -5 -10   4  369.66   58.79
   4  10  -4   28.80   28.10
   4  10  -4   38.40   38.10
  -4 -10   4  -15.70   26.90
   3  10  -4  526.65   59.99
   3  10  -4  478.45   66.89
  -3 -10   4  608.64   67.39
  -3 -10   4  461.35   48.60
   2  10  -4  329.57   51.79
  -2 -10   4  327.07   40.10
  -2 -10   4  306.97   45.70
   1  10  -4  114.39   34.40
  -1 -10   4   85.29   23.80
  -1 -10   4   73.09   30.20
   0  10  -4  168.18   37.90
   0 -10   4  130.79   26.70
   0 -10   4  134.99   32.00
  -1  10  -4  133.09   35.20
  -1  10  -4   93.89   33.70
   1 -10   4  146.29   31.30
   1 -10   4  124.19   28.50
  -2  10  -4   -5.80   29.70
  -2  10  -4  -14.50   24.10
   2 -10   4   44.10   30.50
   2 -10   4  -25.80   19.10
  -3  10  -4  494.75   60.39
  -3  10  -4  434.86   56.99
   3 -10   4  489.45   54.69
   3 -10   4  575.14   64.19
  -4  10  -4  -17.90   32.40
  -4  10  -4   -2.30   28.50
   4 -10   4   -5.30   25.20
   4 -10   4  -20.20   35.80
  -5  10  -4  737.13   81.19
  -5  10  -4 1024.90   88.09
   5 -10   4  974.10   89.09
  -6  10  -4  -17.20   37.40
   6 -10   4   78.29   45.40
   7   9  -4   -5.20   53.09
  -7  -9   4   47.90   35.70
   6   9  -4  390.76   57.39
   6   9  -4  437.56   73.99
  -6  -9   4  441.26   60.09
   5   9  -4  -22.20   33.60
   5   9  -4   20.00   29.10
  -5  -9   4   27.60   30.20
   4   9  -4  869.91   75.69
   4   9  -4  801.42   83.69
  -4  -9   4  841.82   77.89
   3   9  -4   61.39   30.60
   3   9  -4   59.69   25.00
  -3  -9   4   47.20   26.10
  -3  -9   4   71.89   22.10
   2   9  -4  846.02   79.09
   2   9  -4  986.00   74.09
  -2  -9   4  941.91   69.59
  -2  -9   4  958.90   77.79
   1   9  -4  492.75   56.99
   1   9  -4  495.55   47.80
  -1  -9   4  560.84   53.39
  -1  -9   4  535.35   47.20
   0   9  -4  150.28   34.30
   0   9  -4  181.68   33.60
   0  -9   4  134.69   21.60
   0  -9   4  132.69   25.90
   0  -9   4  112.29   27.50
  -1   9  -4 1580.24  110.19
  -1   9  -4 1476.45  111.49
  -1   9  -4 1548.95  113.39
   1  -9   4 1523.65  103.99
   1  -9   4 1574.54  107.19
   1  -9   4 1714.03  109.39
  -2   9  -4  320.67   43.80
  -2   9  -4  237.78   40.90
  -2   9  -4  401.36   48.00
   2  -9   4  279.17   34.10
   2  -9   4  337.47   42.60
   2  -9   4  292.77   37.20
   2  -9   4  333.07   44.20
  -3   9  -4  549.35   59.29
  -3   9  -4  575.24   58.59
   3  -9   4  554.34   60.59
   3  -9   4  528.75   52.09
  -4   9  -4  215.68   41.90
  -4   9  -4  261.17   43.10
   4  -9   4  186.28   41.20
   4  -9   4  186.48   34.30
  -5   9  -4   10.40   34.60
  -5   9  -4   28.20   28.90
   5  -9   4    1.90   32.60
  -6   9  -4  -17.30   35.30
   6  -9   4   19.50   38.10
  -7   9  -4  107.49   44.90
   7  -9   4  168.18   53.69
   7   8  -4  -38.10   47.40
   7   8  -4   71.89   35.40
  -7  -8   4   59.39   35.20
   6   8  -4  682.23   69.99
   6   8  -4  497.15   81.09
  -6  -8   4  583.04   72.39
   5   8  -4   -3.40   23.40
   5   8  -4   13.00   36.50
  -5  -8   4   60.49   32.70
   4   8  -4   25.80   28.90
   4   8  -4   36.10   25.90
  -4  -8   4   62.29   21.00
  -4  -8   4   51.79   30.30
   3   8  -4   60.99   21.80
   3   8  -4   39.20   25.00
  -3  -8   4   35.20   24.30
  -3  -8   4   62.59   18.60
   2   8  -4  665.73   50.69
   2   8  -4  586.34   57.19
   2   8  -4  653.83   54.29
  -2  -8   4  699.73   49.90
  -2  -8   4  593.04   56.99
  -2  -8   4  623.04   50.09
   1   8  -4  305.27   40.30
   1   8  -4  251.67   34.40
  -1  -8   4  262.27   29.70
  -1  -8   4  221.38   26.60
  -1  -8   4  250.47   35.30
   0   8  -4 1390.16   96.29
   0   8  -4 1225.58   94.49
   0   8  -4 1292.17   96.79
   0  -8   4 1460.15   89.69
   0  -8   4 1374.96   90.79
  -1   8  -4    1.90   20.60
  -1   8  -4   26.20   18.80
  -1   8  -4  -12.90   17.60
   1  -8   4    4.00   15.70
   1  -8   4    8.50   13.70
   1  -8   4   14.30   15.60
  -2   8  -4 1084.99   80.59
  -2   8  -4 1198.98   84.99
  -2   8  -4 1097.49   84.09
   2  -8   4 1091.89   80.69
   2  -8   4 1061.29   77.49
   2  -8   4 1125.69   83.99
   2  -8   4 1204.88   82.29
  -3   8  -4  180.88   30.30
  -3   8  -4  240.98   31.60
  -3   8  -4  251.17   38.10
  -3   8  -4  220.48   35.80
   3  -8   4  199.08   31.10
   3  -8   4  232.08   31.20
   3  -8   4  189.58   35.40
  -4   8  -4  200.58   38.90
  -4   8  -4  193.28   36.40
   4  -8   4  221.98   41.40
  -5   8  -4  574.34   62.29
  -5   8  -4  545.25   60.09
   5  -8   4  477.45   63.79
  -6   8  -4  318.27   50.89
   6  -8   4  164.88   29.50
   6  -8   4  220.88   52.49
  -7   8  -4  264.17   51.09
   7  -8   4  230.08   57.39
   7  -8   4  166.08   34.30
   8  -8   4  340.57   65.39
   8  -8   4  204.48   38.70
   8   7  -4  -29.80   44.40
  -8  -7   4   21.20   32.80
   7   7  -4  271.97   62.49
   7   7  -4  389.46   54.99
  -7  -7   4  348.87   56.19
   6   7  -4   46.70   28.70
   6   7  -4    5.20   41.60
  -6  -7   4   30.00   29.40
   5   7  -4   48.90   38.50
   5   7  -4   34.60   23.30
  -5  -7   4   45.50   27.30
   4   7  -4  873.51   79.29
   4   7  -4  841.42   72.29
  -4  -7   4  929.61   64.59
  -4  -7   4  975.30   76.39
  -4  -7   4  916.51   65.89
   3   7  -4    5.60   19.50
   3   7  -4   14.80   15.70
  -3  -7   4    0.80   18.10
  -3  -7   4    0.40   12.60
  -3  -7   4    5.30   12.90
   2   7  -4 1616.24  115.49
   2   7  -4 1749.32  110.79
   2   7  -4 1708.03  112.09
  -2  -7   4 1756.52  107.89
  -2  -7   4 1669.93  108.19
  -2  -7   4 1642.94  114.09
   1   7  -4   24.30    8.40
   1   7  -4   16.60   17.60
   1   7  -4   24.80   18.60
  -1  -7   4   30.10   13.10
  -1  -7   4   26.40   12.40
  -1  -7   4   14.50   18.30
   0   7  -4  146.79   28.00
   0   7  -4  167.58   27.50
   0   7  -4  163.38   25.70
   0  -7   4  139.19   20.20
   0  -7   4  119.89   19.10
   0  -7   4  151.18   25.40
  -1   7  -4  106.19   24.30
  -1   7  -4  117.29   25.70
  -1   7  -4   79.89   19.60
   1  -7   4   73.49   15.90
   1  -7   4  124.49   23.60
   1  -7   4   89.19   18.60
  -2   7  -4 1180.38   81.79
  -2   7  -4 1122.19   78.99
  -2   7  -4 1222.28   82.89
   2  -7   4 1162.28   80.19
   2  -7   4 1139.19   78.29
   2  -7   4  968.30   80.79
   2  -7   4 1092.39   76.59
  -3   7  -4   85.09   18.90
  -3   7  -4   82.39   24.00
  -3   7  -4   70.39   21.50
  -3   7  -4   67.29   23.30
   3  -7   4   53.09   19.60
   3  -7   4   47.10   23.80
   3  -7   4   38.60   18.60
   3  -7   4   74.19   23.80
   3  -7   4   90.49   16.00
  -4   7  -4 1567.14  112.89
   4  -7   4 1547.05  115.59
   4  -7   4 1722.13  104.69
  -5   7  -4   -4.50   25.40
   5  -7   4   17.90   16.90
   5  -7   4   49.99   32.20
  -6   7  -4  447.76   58.29
   6  -7   4  401.86   42.90
   6  -7   4  464.45   62.79
  -7   7  -4   54.09   36.90
   7  -7   4   82.79   44.80
   7  -7   4   60.99   25.60
  -8   7  -4   37.20   41.00
   8  -7   4   45.20   27.40
   8  -7   4  131.59   52.89
   8   6  -4  -23.90   46.60
  -8  -6   4   26.80   31.50
   7   6  -4   55.79   29.60
   7   6  -4   72.39   48.90
  -7  -6   4   74.59   34.40
   6   6  -4   44.90   26.70
   6   6  -4   33.30   41.70
  -6  -6   4   76.59   30.50
   5   6  -4  522.65   51.89
   5   6  -4  628.64   70.79
  -5  -6   4  450.55   50.89
  -5  -6   4  477.55   42.90
   4   6  -4    4.70   16.40
   4   6  -4   15.50    9.70
   4   6  -4   11.10   24.50
  -4  -6   4   43.10   23.00
  -4  -6   4    1.00   11.40
  -4  -6   4    5.50   12.60
   3   6  -4 1668.73   99.29
   3   6  -4 1606.44  111.09
   3   6  -4 1492.95  105.99
  -3  -6   4 1673.23  102.69
  -3  -6   4 1615.84  100.99
  -3  -6   4 1542.15  108.29
   2   6  -4  302.77   23.90
   2   6  -4  302.97   33.60
   2   6  -4  335.87   38.40
   2   6  -4  309.87   31.90
  -2  -6   4  311.47   27.10
  -2  -6   4  263.27   27.20
  -2  -6   4  351.06   35.50
   1   6  -4 1086.89   64.69
   1   6  -4  895.21   71.89
   1   6  -4  942.01   70.39
  -1  -6   4  962.70   71.49
  -1  -6   4 1054.69   66.39
  -1  -6   4 1007.80   66.89
   0   6  -4 1932.31  128.49
   0   6  -4 1992.70  126.99
   0   6  -4 1955.00  126.49
   0  -6   4 1985.20  122.79
   0  -6   4 1958.10  122.69
   0  -6   4 2026.50  127.09
  -1   6  -4   23.30   15.60
  -1   6  -4   14.40   16.60
  -1   6  -4    4.90   14.20
   1  -6   4    5.70   10.60
   1  -6   4   10.90   13.90
   1  -6   4   17.00   11.30
  -2   6  -4 2150.78  128.79
  -2   6  -4 1974.90  127.49
  -2   6  -4 1810.52  128.49
   2  -6   4 1956.10  125.49
   2  -6   4 1850.41  127.89
   2  -6   4 2016.90  129.09
   2  -6   4 2070.19  126.59
   2  -6   4 2094.49  121.49
  -3   6  -4  -16.40   13.80
  -3   6  -4   30.70   18.40
  -3   6  -4   30.40   11.90
   3  -6   4   16.60   19.20
   3  -6   4   41.10   19.90
   3  -6   4    7.40   10.20
   3  -6   4  -14.50   14.60
  -4   6  -4  179.38   32.10
  -4   6  -4  135.49   24.80
   4  -6   4  112.79   19.50
   4  -6   4  132.69   29.30
  -5   6  -4   13.10   24.50
   5  -6   4   17.10   15.60
   5  -6   4   -3.40   25.50
  -6   6  -4  162.58   38.50
   6  -6   4  189.48   28.60
   6  -6   4   91.89   39.80
  -7   6  -4  -21.20   28.60
   7  -6   4   12.40   22.70
   7  -6   4  -53.39   37.10
  -8   6  -4  432.46   63.79
   8  -6   4  334.07   45.60
   8  -6   4  493.95   68.19
   9   5  -4  138.59   53.09
   8   5  -4   60.29   54.09
  -8  -5   4   76.79   33.70
   7   5  -4 1084.79   75.29
   7   5  -4  703.53   95.49
   7   5  -4 1029.00   85.19
  -7  -5   4 1062.99   85.39
   6   5  -4  -20.20   17.30
   6   5  -4  -24.10   35.50
   6   5  -4    9.00   13.40
  -6  -5   4  -12.20   13.40
  -6  -5   4    0.20   23.10
   5   5  -4  908.71   77.29
   5   5  -4  717.63   64.99
   5   5  -4  853.81   57.89
  -5  -5   4  776.82   67.49
  -5  -5   4  848.12   58.79
   4   5  -4  116.79   30.40
   4   5  -4  122.59   17.60
   4   5  -4  139.49   24.50
  -4  -5   4  151.78   17.90
  -4  -5   4  127.99   18.90
  -4  -5   4  120.49   25.90
   3   5  -4   47.60   16.30
   3   5  -4   69.49   21.90
   3   5  -4   38.70   10.10
  -3  -5   4   59.09   11.50
  -3  -5   4   58.69   18.90
  -3  -5   4   35.20   12.30
   2   5  -4  373.36   34.10
   2   5  -4  301.47   33.80
   2   5  -4  324.67   32.50
   2   5  -4  349.57   27.10
  -2  -5   4  410.96   28.10
  -2  -5   4  378.46   30.00
  -2  -5   4  336.17   33.50
   1   5  -4  947.91   66.49
   1   5  -4 1035.80   62.69
   1   5  -4  943.01   68.89
  -1  -5   4  955.10   66.89
  -1  -5   4  989.30   61.69
  -1  -5   4  844.62   61.89
   0   5  -4   11.50   12.40
   0   5  -4   11.40   15.60
   0   5  -4   -8.30   10.30
   0  -5   4   18.80    9.10
   0  -5   4   21.20   14.00
   0  -5   4   17.10    9.20
  -1   5  -4 1862.41  122.29
  -1   5  -4 1823.42  120.59
  -1   5  -4 1946.01  121.09
   1  -5   4 1978.10  121.39
   1  -5   4 2002.90  119.39
   1  -5   4 1913.81  118.79
  -2   5  -4   83.79   17.60
  -2   5  -4   60.89   19.10
  -2   5  -4   61.79   15.90
   2  -5   4   67.89   12.00
   2  -5   4   58.69   15.70
   2  -5   4   54.79   20.10
   2  -5   4   67.69    9.60
   2  -5   4   68.49   17.80
   2  -5   4   58.19   15.80
  -3   5  -4  575.74   44.00
  -3   5  -4  639.74   48.70
  -3   5  -4  659.93   52.29
   3  -5   4  651.73   44.40
   3  -5   4  552.14   50.59
   3  -5   4  637.94   52.29
  -4   5  -4  623.74   52.99
  -4   5  -4  652.43   52.19
   4  -5   4  569.44   45.60
   4  -5   4  622.24   49.50
   4  -5   4  594.34   55.99
  -5   5  -4   43.70   25.30
  -5   5  -4   67.79   21.70
   5  -5   4   85.49   20.20
   5  -5   4  105.99   31.80
  -6   5  -4  851.91   75.69
   6  -5   4  910.01   81.89
   6  -5   4  856.11   66.89
  -7   5  -4  151.58   39.30
   7  -5   4   63.79   39.10
   7  -5   4   76.29   26.40
  -8   5  -4  141.69   42.60
   8  -5   4  102.39   45.50
   8  -5   4  127.59   34.10
   9  -5   4  -30.60   62.89
   9   4  -4   75.49   50.59
   8   4  -4  184.18   58.59
   8   4  -4  337.07   41.90
  -8  -4   4  404.56   49.99
  -8  -4   4  414.56   52.89
   7   4  -4   53.59   43.80
   7   4  -4   37.70   19.10
   7   4  -4   33.80   24.60
  -7  -4   4   59.69   28.60
   6   4  -4  250.67   35.30
   6   4  -4  291.67   31.20
   6   4  -4  199.98   24.70
   6   4  -4  244.88   50.69
  -6  -4   4  254.37   38.70
  -6  -4   4  217.48   25.90
   5   4  -4 1162.18   68.29
   5   4  -4 1024.10   86.29
   5   4  -4 1033.50   70.99
   5   4  -4  963.10   76.39
  -5  -4   4 1001.40   69.49
  -5  -4   4 1062.29   78.19
   4   4  -4    1.00    6.30
   4   4  -4   17.30   10.00
   4   4  -4   13.50   12.80
   4   4  -4   12.20   21.30
  -4  -4   4   -1.20    8.80
  -4  -4   4    0.70    8.00
  -4  -4   4  -15.80   14.40
   3   4  -4 2393.06  141.09
   3   4  -4 2407.46  149.29
   3   4  -4 2244.18  145.19
   3   4  -4 2360.46  137.49
  -3  -4   4 2330.87  138.89
  -3  -4   4 2166.98  145.39
  -3  -4   4 2295.77  140.79
   2   4  -4 1009.30   66.49
   2   4  -4  900.61   64.49
   2   4  -4  939.11   66.49
   2   4  -4  952.60   56.49
   2   4  -4  942.71   60.89
  -2  -4   4  983.20   59.39
  -2  -4   4  864.91   65.19
  -2  -4   4 1005.60   61.49
   1   4  -4 1386.36   87.99
   1   4  -4 1363.96   85.69
   1   4  -4 1329.57   90.49
  -1  -4   4 1252.67   87.59
  -1  -4   4 1329.47   88.69
  -1  -4   4 1353.76   84.69
  -1  -4   4 1443.56   83.29
   0   4  -4   92.69   15.40
   0   4  -4  105.39   18.40
   0   4  -4  120.89   21.10
   0  -4   4  139.69   20.20
   0  -4   4  101.39   17.40
   0  -4   4   74.39   11.70
   0  -4   4  103.39   14.20
  -1   4  -4  141.99   17.70
  -1   4  -4  121.19   18.80
  -1   4  -4   70.89   14.90
   1  -4   4   86.89   13.80
   1  -4   4  115.79   18.20
   1  -4   4  129.19   20.80
   1  -4   4   97.99   14.10
   1  -4   4  119.99   13.20
  -2   4  -4  769.12   51.99
  -2   4  -4  779.52   54.19
  -2   4  -4  735.23   54.79
   2  -4   4  685.03   57.09
   2  -4   4  704.63   54.69
   2  -4   4  763.82   48.30
   2  -4   4  822.52   50.19
   2  -4   4  775.22   53.79
  -3   4  -4 1223.38   82.89
  -3   4  -4 1250.27   81.59
   3  -4   4 1054.99   83.09
   3  -4   4 1197.28   84.09
   3  -4   4 1237.98   77.99
   3  -4   4 1269.77   76.19
  -4   4  -4   52.49   21.30
  -4   4  -4   44.90   17.10
   4  -4   4   49.90   23.10
   4  -4   4   79.39   19.70
   4  -4   4   75.89   15.90
  -5   4  -4 1772.22  126.49
  -5   4  -4 2059.79  125.29
   5  -4   4 1827.02  132.59
   5  -4   4 1943.61  122.09
  -6   4  -4  137.79   31.20
   6  -4   4  114.19   37.30
   6  -4   4   88.59   24.50
  -7   4  -4 1204.08   92.49
   7  -4   4 1098.59   98.79
   7  -4   4 1066.39   84.09
  -8   4  -4  325.07   51.19
   8  -4   4  310.27   59.89
   8  -4   4  300.57   45.50
  -9   4  -4  -18.50   38.40
   9  -4   4  -92.09   45.00
   9   3  -4   20.80   24.80
   9   3  -4   45.70   46.60
   8   3  -4    1.60   41.80
   8   3  -4    9.40   19.50
   8   3  -4  -11.00   18.00
  -8  -3   4   46.20   26.60
   7   3  -4  238.28   33.30
   7   3  -4  161.28   48.20
   7   3  -4  262.37   31.00
  -7  -3   4  245.38   36.70
  -7  -3   4  267.77   39.10
   6   3  -4  928.31   62.49
   6   3  -4  953.90   66.39
   6   3  -4  810.42   83.99
   6   3  -4  873.41   70.19
  -6  -3   4  881.91   61.29
  -6  -3   4  898.61   69.99
   5   3  -4  145.49   21.50
   5   3  -4  166.58   25.70
   5   3  -4  157.68   19.10
   5   3  -4  156.38   37.30
  -5  -3   4  157.08   18.40
  -5  -3   4  162.08   27.10
   4   3  -4 2772.82  164.38
   4   3  -4 2675.33  170.28
   4   3  -4 2711.93  176.88
   4   3  -4 2734.63  166.88
  -4  -3   4 2684.83  170.48
  -4  -3   4 2732.93  163.28
  -4  -3   4 2824.62  164.88
   3   3  -4   37.90   18.70
   3   3  -4   18.30    8.20
   3   3  -4   13.30    5.90
   3   3  -4   27.80   12.30
   3   3  -4    9.20    6.30
  -3  -3   4   18.80    7.70
  -3  -3   4   18.20    5.80
  -3  -3   4   11.50   13.70
   2   3  -4 1321.97   78.89
   2   3  -4 1224.98   79.59
   2   3  -4 1310.77   76.69
   2   3  -4 1243.38   83.59
   2   3  -4 1254.17   84.29
  -2  -3   4 1302.77   76.69
  -2  -3   4 1316.67   79.19
  -2  -3   4 1205.88   83.49
  -2  -3   4 1263.97   83.29
   1   3  -4 2291.37  144.89
   1   3  -4 2307.17  141.69
   1   3  -4 2389.76  137.09
   1   3  -4 2389.86  139.59
   1   3  -4 2319.67  142.49
  -1  -3   4 2215.48  143.29
  -1  -3   4 2304.37  139.79
  -1  -3   4 2367.96  137.89
  -1  -3   4 2293.97  143.49
   0   3  -4   21.00    8.50
   0   3  -4   25.80   11.30
   0   3  -4   18.50    7.00
   0   3  -4   39.80   14.50
   0  -3   4   23.50    8.40
   0  -3   4   31.60   11.70
   0  -3   4   11.70    6.00
   0  -3   4   17.20    8.40
   0  -3   4   27.60   11.00
  -1   3  -4 5960.90  370.06
  -1   3  -4 6057.99  371.36
  -1   3  -4 6320.47  368.76
  -1   3  -4 6734.43  370.26
   1  -3   4 6440.66  371.06
   1  -3   4 6101.29  373.06
   1  -3   4 6497.15  368.26
   1  -3   4 5867.71  369.36
   1  -3   4 6331.17  370.46
  -2   3  -4  160.48   16.10
  -2   3  -4  109.99   18.60
  -2   3  -4   98.59   16.10
   2  -3   4  184.58   27.10
   2  -3   4  101.19   12.90
   2  -3   4  126.09   15.10
   2  -3   4   98.79   18.80
  -3   3  -4 3128.39  186.68
  -3   3  -4 2911.21  184.08
   3  -3   4 3267.87  182.78
   3  -3   4 3068.59  189.58
   3  -3   4 3085.49  182.98
   3  -3   4 2664.53  186.98
  -4   3  -4   43.40   19.00
  -4   3  -4   45.30   16.60
   4  -3   4   20.60   13.90
   4  -3   4   21.80   16.50
   4  -3   4   37.50   10.50
   4  -3   4   32.00   23.60
  -5   3  -4   60.59   18.50
  -5   3  -4   40.60   20.00
   5  -3   4   25.70   25.00
   5  -3   4   28.30   16.00
  -6   3  -4   77.49   26.20
  -6   3  -4   28.20   18.90
   6  -3   4  124.29   26.00
   6  -3   4   53.59   31.50
  -7   3  -4  420.16   50.89
   7  -3   4  310.97   41.00
   7  -3   4  327.07   55.49
  -8   3  -4   74.79   34.30
   8  -3   4   51.99   41.40
  -9   3  -4  351.56   55.39
   9  -3   4  464.35   70.49
   9   2  -4   16.10   25.40
   9   2  -4   18.00   24.00
   8   2  -4 1314.17   93.99
   8   2  -4 1169.88  114.49
  -8  -2   4 1311.67   94.79
  -8  -2   4 1251.07  116.59
   7   2  -4   15.80   15.50
   7   2  -4   13.40   15.70
   7   2  -4  -29.50   33.30
   7   2  -4   11.60   17.70
  -7  -2   4   21.40   20.30
  -7  -2   4   18.40   18.90
   6   2  -4 1810.62  114.49
   6   2  -4 1659.13  111.59
   6   2  -4 1680.83  130.09
   6   2  -4 1697.93  111.49
  -6  -2   4 1823.02  116.49
  -6  -2   4 1856.61  116.99
  -6  -2   4 1726.93  114.39
   5   2  -4   89.79   17.90
   5   2  -4   55.99   29.60
   5   2  -4   94.89   15.90
   5   2  -4   57.79   13.60
  -5  -2   4   96.19   20.80
  -5  -2   4   80.59   12.10
   4   2  -4   73.69   25.80
   4   2  -4   76.39   12.70
   4   2  -4   66.49   13.60
  -4  -2   4   71.99   10.30
  -4  -2   4   73.29   16.80
   3   2  -4  767.22   46.70
   3   2  -4  739.83   46.10
   3   2  -4  685.43   48.40
   3   2  -4  663.73   55.09
  -3  -2   4  716.73   46.20
  -3  -2   4  720.23   43.90
  -3  -2   4  717.63   51.29
   2   2  -4  663.43   43.70
   2   2  -4  565.34   35.60
   2   2  -4  542.85   37.80
   2   2  -4  588.44   41.70
   2   2  -4  547.45   35.00
  -2  -2   4  529.15   39.90
  -2  -2   4  545.75   35.80
  -2  -2   4  485.65   32.90
   1   2  -4  748.63   42.90
   1   2  -4  692.43   47.60
   1   2  -4  605.24   49.40
   1   2  -4  721.13   47.80
   1   2  -4  703.43   44.80
  -1  -2   4  691.63   45.00
  -1  -2   4  663.33   47.10
  -1  -2   4  729.03   49.50
  -1  -2   4  710.23   49.20
   0   2  -4 1441.86   94.19
   0   2  -4 1318.17   94.49
   0   2  -4 1559.44   91.59
   0   2  -4 1598.84   90.29
   0   2  -4 1478.45   90.79
   0  -2   4 1532.15   90.89
   0  -2   4 1509.95   91.69
   0  -2   4 1532.35   91.29
   0  -2   4 1332.57   93.09
   0  -2   4 1498.05   94.99
  -1   2  -4  433.46   32.70
  -1   2  -4  393.36   31.30
  -1   2  -4  424.06   27.70
  -1   2  -4  389.16   31.60
   1  -2   4  414.66   31.40
   1  -2   4  431.86   31.90
   1  -2   4  416.06   31.60
   1  -2   4  389.86   37.40
  -2   2  -4 1155.28   83.49
  -2   2  -4 1253.87   81.69
  -2   2  -4 1285.77   79.99
  -2   2  -4 1260.37   76.59
   2  -2   4 1277.07   80.19
   2  -2   4 1359.06   77.89
   2  -2   4 1256.07   81.59
   2  -2   4 1199.18   83.09
   2  -2   4 1235.08   85.39
  -3   2  -4  773.02   53.09
  -3   2  -4  820.02   55.39
   3  -2   4  734.13   51.79
   3  -2   4  763.22   52.29
   3  -2   4  753.72   57.49
   3  -2   4  657.43   57.59
  -4   2  -4   97.99   20.40
  -4   2  -4  105.99   18.60
   4  -2   4  133.29   27.90
   4  -2   4  110.89   23.50
   4  -2   4   91.69   16.00
   4  -2   4   96.89   18.70
  -5   2  -4 1974.80  125.19
  -5   2  -4 1980.10  128.39
   5  -2   4 2047.00  123.89
   5  -2   4 1728.93  124.49
   5  -2   4 2110.09  136.59
  -6   2  -4   20.60   19.80
  -6   2  -4   12.10   16.80
   6  -2   4    3.90   17.50
   6  -2   4   20.90   28.20
  -7   2  -4  445.06   52.39
   7  -2   4  394.26   61.19
  -8   2  -4   33.50   31.40
   8  -2   4    9.20   42.70
   9  -2   4  -66.89   40.20
  10   1  -4  110.39   30.80
  10   1  -4  228.18   37.90
   9   1  -4  102.59   29.60
   9   1  -4   47.30   28.90
   8   1  -4   29.00   19.90
   8   1  -4   71.99   25.60
  -8  -1   4  137.29   49.40
   7   1  -4  300.27   36.10
   7   1  -4  194.88   38.20
   7   1  -4  183.38   46.70
   7   1  -4  203.68   28.80
  -7  -1   4  282.37   55.69
  -7  -1   4  295.37   36.20
   6   1  -4  122.79   22.10
   6   1  -4  111.09   35.20
   6   1  -4  152.18   20.20
   6   1  -4   79.19   18.20
  -6  -1   4  155.08   23.60
  -6  -1   4  151.48   25.90
  -6  -1   4   87.39   20.20
   5   1  -4  250.17   22.80
   5   1  -4  265.27   28.30
   5   1  -4  188.98   37.80
   5   1  -4  274.47   26.70
  -5  -1   4  242.78   26.90
  -5  -1   4  220.38   20.00
  -5  -1   4  290.87   32.00
   4   1  -4 1823.32  128.19
   4   1  -4 1955.10  117.99
   4   1  -4 1875.01  119.39
   4   1  -4 1915.31  116.09
  -4  -1   4 1907.21  114.89
  -4  -1   4 1966.90  120.39
  -4  -1   4 1950.40  121.09
   3   1  -4    6.10    4.10
   3   1  -4   -4.90   13.90
   3   1  -4    2.40    6.70
   3   1  -4    1.10    7.20
  -3  -1   4    4.00    9.10
  -3  -1   4   -8.60    9.30
  -3  -1   4    7.70    4.80
   2   1  -4 4757.22  285.77
   2   1  -4 4670.93  280.17
   2   1  -4 4683.33  281.87
   2   1  -4 4847.12  279.07
   2   1  -4 4770.02  279.37
  -2  -1   4 4808.82  283.27
  -2  -1   4 4551.34  282.57
  -2  -1   4 4932.21  279.17
   1   1  -4  105.59   15.00
   1   1  -4  100.29   11.00
   1   1  -4   99.29   10.30
   1   1  -4   74.99   14.90
   1   1  -4   79.59   13.70
  -1  -1   4   86.79   10.10
  -1  -1   4   82.19   14.00
  -1  -1   4  107.49   16.90
  -1  -1   4   77.49    8.40
   0   1  -4   34.90    8.70
   0   1  -4   29.20   12.40
   0   1  -4   26.60    7.40
   0   1  -4   34.90   10.00
   0  -1   4   21.70    8.40
   0  -1   4   22.90   14.20
   0  -1   4   23.40   10.70
   0  -1   4   42.30   12.40
  -1   1  -4  341.17   25.70
  -1   1  -4  313.77   26.50
  -1   1  -4  318.87   25.70
  -1   1  -4  319.07   25.90
  -1   1  -4  309.97   20.30
   1  -1   4  351.56   32.70
   1  -1   4  306.77   27.40
   1  -1   4  341.37   22.70
   1  -1   4  328.67   26.20
   1  -1   4  274.77   27.10
  -2   1  -4 1270.17   84.59
  -2   1  -4 1289.47   84.69
  -2   1  -4 1340.27   83.19
   2  -1   4 1415.86   82.99
   2  -1   4 1214.08   88.99
   2  -1   4 1303.37   87.39
   2  -1   4 1391.76   83.49
   2  -1   4 1407.86   86.59
  -3   1  -4   39.20   14.10
  -3   1  -4   66.99   12.90
   3  -1   4   39.40   10.20
   3  -1   4   73.69   10.80
   3  -1   4   18.30   16.80
   3  -1   4   74.39   20.10
   3  -1   4   62.09   14.00
  -4   1  -4 1316.57   86.79
  -4   1  -4 1366.76   89.49
   4  -1   4 1478.45   96.89
   4  -1   4 1282.67   88.09
  -5   1  -4    2.70   12.60
  -5   1  -4   18.00   16.40
   5  -1   4   -5.90   21.60
   5  -1   4   24.50   16.00
   5  -1   4   20.40   13.10
  -6   1  -4  599.34   51.39
  -6   1  -4  499.25   45.40
   6  -1   4  555.94   46.40
   6  -1   4  500.05   61.49
  -7   1  -4  107.29   30.10
   7  -1   4   95.69   40.70
  -8   1  -4   34.30   34.10
   8  -1   4   27.50   41.30
  -9   1  -4  656.33   73.69
   9  -1   4  543.05   81.89
  10   0  -4    3.60   29.60
  10   0  -4  -14.40   23.60
 -10   0   4  113.29   35.60
   9   0  -4   89.59   30.40
   9   0  -4  135.39   32.30
   8   0  -4   80.19   23.90
   8   0  -4   84.09   27.00
  -8   0   4   72.09   43.70
   7   0  -4   -6.50   15.40
   7   0  -4  -11.90   18.10
  -7   0   4  -19.40   37.60
  -7   0   4  -16.00   19.10
   6   0  -4  528.25   45.50
   6   0  -4  566.94   43.80
   6   0  -4  493.95   40.60
   6   0  -4  537.95   64.89
  -6   0   4  565.04   46.90
  -6   0   4  612.94   70.99
  -6   0   4  561.94   47.30
   5   0  -4  486.45   39.00
   5   0  -4  449.56   39.60
   5   0  -4  522.35   52.19
   5   0  -4  530.25   35.90
  -5   0   4  511.05   40.80
  -5   0   4  495.05   38.30
  -5   0   4  528.65   41.80
  -5   0   4  378.36   54.79
  -5   0   4  488.45   32.20
   4   0  -4    0.90    7.90
   4   0  -4   10.80    6.20
   4   0  -4    1.00   19.30
   4   0  -4   19.60   10.70
  -4   0   4   20.40   10.80
  -4   0   4    9.60    4.50
  -4   0   4   -2.10   12.60
   3   0  -4 1633.64  100.89
   3   0  -4 1666.43  100.69
   3   0  -4 1589.44  107.69
   3   0  -4 1634.14   97.29
   3   0  -4 1646.04  102.19
  -3   0   4 1685.03   97.29
  -3   0   4 1693.03  101.99
  -3   0   4 1551.14  102.99
   2   0  -4 1679.13  102.49
   2   0  -4 1698.23  106.39
   2   0  -4 1715.93  104.99
   2   0  -4 1753.32  105.59
   2   0  -4 1851.31  110.89
  -2   0   4 1752.32  102.99
  -2   0   4 1758.72  107.49
  -2   0   4 1690.03  108.29
   1   0  -4 3343.07  187.28
   1   0  -4 3319.27  188.38
   1   0  -4 3173.48  188.98
   1   0  -4 3241.88  184.18
   1   0  -4 3148.68  185.28
   1   0  -4 3289.57  188.68
  -1   0   4 2774.92  189.08
  -1   0   4 2849.11  189.88
  -1   0   4 3033.20  190.98
   0   0  -4 4190.18  247.98
   0   0  -4 4129.09  247.08
   0   0  -4 4246.67  249.68
   0   0  -4 4138.69  250.27
   0   0   4 4303.67  250.07
   0   0   4 4075.79  248.68
   0   0   4 4328.27  251.57
   0   0   4 4284.27  253.57
   0   0   4 4048.70  247.28
  -1   0  -4   33.80   11.20
  -1   0  -4   47.10    9.90
  -1   0  -4   52.49   12.10
   1   0   4   48.40   13.90
   1   0   4   48.20    9.90
   1   0   4   57.59   12.30
   1   0   4   59.19   10.10
   1   0   4   53.99   14.00
   1   0   4   48.20   17.00
  -2   0  -4 4318.97  261.57
  -2   0  -4 4265.57  263.07
  -2   0  -4 4231.98  264.67
   2   0   4 4447.65  266.27
   2   0   4 4466.25  261.77
   2   0   4 4600.44  268.97
   2   0   4 4521.35  263.27
   2   0   4 4574.64  266.67
  -3   0  -4    8.40    8.40
  -3   0  -4    7.10   10.20
   3   0   4   -0.50    6.90
   3   0   4    5.90   11.40
   3   0   4   11.40    8.90
   3   0   4   -4.40   14.40
  -4   0  -4  497.85   39.80
  -4   0  -4  483.95   36.90
   4   0   4  484.05   41.30
   4   0   4  497.55   50.69
  -5   0  -4  325.97   35.50
  -5   0  -4  339.87   31.70
   5   0   4  368.46   36.70
   5   0   4  304.37   44.30
  -6   0  -4  142.99   26.70
   6   0   4  144.89   37.40
   6   0   4  115.09   23.70
  -7   0  -4   87.49   33.90
   7   0   4   91.39   41.80
   7   0   4   97.59   25.10
  -8   0  -4  188.98   41.50
   8   0   4  238.78   54.69
  -9   0  -4   90.69   42.60
   9   0   4   34.40   42.90
  10  -1  -4    5.60   29.90
  10  -1  -4  -13.70   23.80
 -10   1   4   91.59   36.20
   9  -1  -4  422.66   46.70
   9  -1  -4  283.47   43.40
   8  -1  -4    5.20   20.00
   8  -1  -4   10.60   21.90
  -8   1   4   31.50   45.90
   7  -1  -4 1682.23  117.39
   7  -1  -4 1796.42  117.09
  -7   1   4 1801.42  135.89
   6  -1  -4  137.89   23.60
   6  -1  -4  125.29   22.40
   6  -1  -4  122.89   17.80
  -6   1   4  100.79   37.90
  -6   1   4  101.79   20.70
  -6   1   4  159.08   27.10
   5  -1  -4 1555.34  102.89
   5  -1  -4 1631.14   99.39
   5  -1  -4 1569.74  104.29
  -5   1   4 1606.64  104.49
  -5   1   4 1600.34  117.09
  -5   1   4 1673.93  106.09
   4  -1  -4 1029.10   77.69
   4  -1  -4  987.20   69.19
   4  -1  -4 1049.09   64.79
   4  -1  -4 1064.29   68.79
  -4   1   4 1162.48   72.89
  -4   1   4 1025.70   66.89
  -4   1   4  998.60   80.59
   3  -1  -4   16.10    6.80
   3  -1  -4   13.60    4.00
   3  -1  -4    5.10    7.80
   3  -1  -4   16.70   15.50
   3  -1  -4   13.70    8.60
   3  -1  -4    9.00    8.30
  -3   1   4   22.80   13.60
  -3   1   4   29.90   11.60
  -3   1   4   24.30   21.00
   2  -1  -4 1895.51  116.89
   2  -1  -4 1980.50  112.39
   2  -1  -4 1951.30  114.49
   2  -1  -4 1991.50  117.39
   2  -1  -4 2035.70  117.39
  -2   1   4 1966.20  124.09
  -2   1   4 1573.34  119.59
  -2   1   4 1900.01  119.19
   1  -1  -4 2747.82  162.28
   1  -1  -4 2746.63  159.78
   1  -1  -4 2753.12  160.08
   1  -1  -4 2588.64  162.58
  -1   1   4 2595.04  166.28
  -1   1   4 2624.84  165.58
  -1   1   4 2784.72  165.68
   0  -1  -4  253.57   23.40
   0  -1  -4  286.17   23.30
   0  -1  -4  312.17   26.30
   0   1   4  268.77   27.00
   0   1   4  306.67   23.10
   0   1   4  259.77   28.30
   0   1   4  301.97   28.90
   0   1   4  367.96   24.30
  -1  -1  -4 2749.43  176.58
  -1  -1  -4 2747.53  173.78
   1   1   4 2976.20  171.98
   1   1   4 2927.81  175.38
   1   1   4 3085.59  176.38
   1   1   4 3019.70  178.18
   1   1   4 2950.20  178.78
   1   1   4 3076.39  174.08
   1   1   4 2609.74  170.18
  -2  -1  -4  266.77   20.80
  -2  -1  -4  273.97   23.10
  -2  -1  -4  294.87   27.70
   2   1   4  256.87   19.80
   2   1   4  292.37   28.70
   2   1   4  231.58   28.10
   2   1   4  273.37   25.10
   2   1   4  289.17   21.40
   2   1   4  227.98   30.10
  -3  -1  -4  260.87   22.20
  -3  -1  -4  253.17   23.80
  -3  -1  -4  233.38   29.10
   3   1   4  304.27   30.50
   3   1   4  280.77   33.30
   3   1   4  309.67   26.40
   3   1   4  268.27   21.00
  -4  -1  -4  983.00   63.59
  -4  -1  -4  917.51   60.59
  -4  -1  -4  903.91   68.59
   4   1   4  932.31   67.69
   4   1   4  893.41   71.39
  -5  -1  -4  109.19   20.70
  -5  -1  -4  105.19   25.90
   5   1   4   97.19   29.40
   5   1   4   85.79   22.80
  -6  -1  -4 1129.99   88.09
   6   1   4 1069.99   92.19
   6   1   4 1186.18   84.99
  -7  -1  -4  125.99   33.00
   7   1   4   98.59   27.40
   7   1   4   48.00   42.20
  -8  -1  -4  313.37   52.39
   8   1   4  298.67   62.09
  -9  -1  -4   29.80   41.30
   9   1   4    9.30   47.20
  10  -2  -4   26.40   39.30
  10  -2  -4   32.40   33.80
 -10   2   4  128.29   43.60
   9  -2  -4  141.69   33.90
   9  -2  -4  164.28   33.70
   8  -2  -4  108.29   29.10
   8  -2  -4   44.50   21.60
  -8   2   4   50.69   45.30
   7  -2  -4   10.10   17.40
   7  -2  -4   31.60   21.40
  -7   2   4  -15.90   38.20
   6  -2  -4   32.60   16.80
   6  -2  -4   17.70   15.10
  -6   2   4   17.70   32.10
  -6   2   4   63.39   24.40
  -6   2   4   25.80   17.30
   5  -2  -4 1202.58   82.29
   5  -2  -4 1171.08   82.89
   5  -2  -4 1327.97   79.19
  -5   2   4 1284.27   84.69
  -5   2   4 1266.67   98.09
  -5   2   4 1171.28   86.39
   4  -2  -4  143.29   19.20
   4  -2  -4  143.09   17.90
   4  -2  -4  129.19   19.10
   4  -2  -4  151.08   15.70
   4  -2  -4  115.19   18.30
  -4   2   4  151.38   19.60
  -4   2   4  148.29   26.60
  -4   2   4  122.89   31.30
   3  -2  -4 5926.71  347.07
   3  -2  -4 5969.00  343.87
   3  -2  -4 5609.44  347.27
   3  -2  -4 5812.82  346.87
   3  -2  -4 6078.19  345.57
  -3   2   4 5700.13  354.86
  -3   2   4 5987.60  351.06
  -3   2   4 5714.33  345.67
   2  -2  -4  112.69   15.40
   2  -2  -4  111.39   16.40
   2  -2  -4  122.99   13.90
   2  -2  -4  135.79   15.60
  -2   2   4  111.79   22.20
  -2   2   4  125.39   17.70
  -2   2   4  129.89   25.90
   1  -2  -4 1951.00  117.09
   1  -2  -4 2101.29  114.99
   1  -2  -4 2059.89  114.79
  -1   2   4 1650.13  119.39
  -1   2   4 1924.11  117.39
  -1   2   4 1549.64  117.89
   0  -2  -4  213.68   20.60
   0  -2  -4  231.08   21.60
   0  -2  -4  241.28   26.40
   0   2   4  249.48   27.50
   0   2   4  253.97   27.90
   0   2   4  216.38   26.50
   0   2   4  225.68   20.40
   0   2   4  225.68   26.20
  -1  -2  -4   46.30   14.10
  -1  -2  -4   44.90    9.00
   1   2   4   25.30   12.20
   1   2   4   40.80   13.20
   1   2   4   26.20   13.90
   1   2   4   16.30    8.90
   1   2   4   23.10   12.70
   1   2   4   32.10    5.50
  -2  -2  -4  688.03   48.80
  -2  -2  -4  714.93   56.59
   2   2   4  756.52   45.70
   2   2   4  740.23   55.59
   2   2   4  795.52   47.90
   2   2   4  794.12   53.99
   2   2   4  777.52   51.79
   2   2   4  735.43   55.49
  -3  -2  -4 1051.09   62.89
  -3  -2  -4  982.80   73.59
  -3  -2  -4 1082.89   65.79
   3   2   4 1018.00   64.19
   3   2   4  890.61   73.19
   3   2   4 1026.90   73.19
  -4  -2  -4  365.16   41.90
   4   2   4  398.26   38.40
   4   2   4  364.76   43.80
  -5  -2  -4 1369.56  101.99
   5   2   4 1529.55  103.69
   5   2   4 1494.05  108.29
  -6  -2  -4   81.69   30.10
   6   2   4   89.19   26.80
   6   2   4   63.79   35.50
  -7  -2  -4  348.67   54.19
   7   2   4  472.95   52.99
   7   2   4  474.85   64.19
  -8  -2  -4  354.46   54.89
   8   2   4  296.17   60.59
   8   2   4  492.65   56.19
   9  -3  -4  117.69   31.10
   9  -3  -4   78.59   28.20
   8  -3  -4    4.10   19.90
   8  -3  -4   18.90   24.90
  -8   3   4    0.50   45.10
   7  -3  -4  713.43   62.49
   7  -3  -4  743.03   60.19
  -7   3   4  761.52   82.59
   6  -3  -4  332.47   38.50
   6  -3  -4  298.17   34.30
  -6   3   4  310.77   51.09
  -6   3   4  334.17   36.60
   5  -3  -4  397.36   35.50
   5  -3  -4  374.86   31.80
   5  -3  -4  401.06   35.30
  -5   3   4  293.77   39.70
  -5   3   4  334.47   50.89
  -5   3   4  398.76   36.40
   4  -3  -4  670.83   45.70
   4  -3  -4  711.73   47.50
   4  -3  -4  657.43   48.20
   4  -3  -4  634.64   48.30
   4  -3  -4  653.73   47.50
  -4   3   4  677.03   53.89
  -4   3   4  604.44   48.70
  -4   3   4  538.65   58.49
   3  -3  -4    7.40   10.90
   3  -3  -4  -12.30    7.50
   3  -3  -4   14.40   10.00
   3  -3  -4   -0.10    8.60
   3  -3  -4   -8.70    8.40
  -3   3   4    2.10   21.20
  -3   3   4    5.30   18.40
  -3   3   4   -0.60    9.00
   2  -3  -4  832.02   47.30
   2  -3  -4  790.72   54.79
   2  -3  -4  702.13   52.89
   2  -3  -4  746.53   51.79
   2  -3  -4  853.91   53.09
  -2   3   4  707.33   62.89
  -2   3   4  816.72   59.29
  -2   3   4  799.32   52.49
   1  -3  -4 1537.65   92.09
   1  -3  -4 1583.04   96.29
   1  -3  -4 1510.25   93.89
   1  -3  -4 1496.75   97.89
  -1   3   4 1461.15   98.49
  -1   3   4 1515.55  102.39
  -1   3   4 1591.54   99.99
  -1   3   4 1556.14   93.49
   0  -3  -4   12.20   11.40
   0  -3  -4   40.20    9.20
   0  -3  -4    2.90   12.20
   0   3   4   29.10    5.30
   0   3   4   18.50   16.20
   0   3   4   23.60   14.80
   0   3   4   41.30   14.50
  -1  -3  -4 7440.26  429.46
  -1  -3  -4 6526.95  427.06
   1   3   4 7045.10  427.06
   1   3   4 7282.97  428.16
   1   3   4 7357.46  429.36
   1   3   4 7545.05  428.76
  -2  -3  -4   10.30   14.50
  -2  -3  -4    9.80   14.70
   2   3   4   -6.60   12.30
   2   3   4    2.30   12.50
   2   3   4    6.50   17.20
   2   3   4    3.80    8.70
   2   3   4   -1.30   14.00
  -3  -3  -4 1998.10  139.39
   3   3   4 2074.69  140.19
   3   3   4 2137.29  139.99
   3   3   4 2347.67  132.69
  -4  -3  -4  242.58   36.70
   4   3   4  253.87   33.40
   4   3   4  234.38   36.40
  -5  -3  -4   -0.10   23.80
   5   3   4   21.70   21.50
   5   3   4   15.60   27.90
  -6  -3  -4  178.88   39.30
   6   3   4  139.39   39.90
   6   3   4  172.08   36.40
  -7  -3  -4   83.39   38.00
   7   3   4   48.50   30.40
   7   3   4   82.49   41.90
  -8  -3  -4   72.19   40.00
   8   3   4   76.19   45.20
   8   3   4  110.89   37.80
   9  -4  -4    6.70   25.60
   9  -4  -4    1.30   26.40
  -9   4   4   78.39   33.80
   8  -4  -4  680.53   67.09
   8  -4  -4  664.93   60.99
  -8   4   4  583.54   81.99
   7  -4  -4   15.80   19.40
   7  -4  -4   24.90   20.90
  -7   4   4   -2.60   40.30
   6  -4  -4 1048.90   73.79
   6  -4  -4  900.51   70.59
  -6   4   4 1003.50   93.09
   5  -4  -4   92.89   20.60
   5  -4  -4  122.19   21.60
   5  -4  -4  105.49   20.10
   5  -4  -4  113.79   19.10
  -5   4   4   93.29   25.50
  -5   4   4   91.29   20.50
  -5   4   4  110.29   38.60
   4  -4  -4  334.47   29.90
   4  -4  -4  235.38   30.50
   4  -4  -4  347.87   29.00
   4  -4  -4  283.37   31.00
   4  -4  -4  332.47   31.20
  -4   4   4  314.47   32.50
  -4   4   4  292.27   35.10
  -4   4   4  247.98   43.80
   3  -4  -4 1601.54  109.99
   3  -4  -4 1681.13  113.09
   3  -4  -4 1923.51  112.79
   3  -4  -4 1813.32  112.19
   3  -4  -4 1820.22  110.79
  -3   4   4 1884.11  112.49
  -3   4   4 1876.21  116.09
  -3   4   4 1773.92  111.69
  -3   4   4 1566.34  120.89
   2  -4  -4   17.70   10.70
   2  -4  -4    2.40    7.50
   2  -4  -4    2.30   10.40
   2  -4  -4    8.50   11.70
   2  -4  -4    5.50    4.20
  -2   4   4    6.60    9.00
  -2   4   4    4.50   11.60
  -2   4   4   13.40   22.20
  -2   4   4   -6.60   15.60
   1  -4  -4 1515.25   95.09
   1  -4  -4 1531.85   89.99
   1  -4  -4 1461.75   90.69
   1  -4  -4 1567.84   95.69
   1  -4  -4 1548.84   97.49
  -1   4   4 1506.75  103.39
  -1   4   4 1455.25   97.09
  -1   4   4 1399.96   95.99
  -1   4   4 1375.46   90.39
   0  -4  -4   35.60    8.80
   0  -4  -4   34.00    8.10
   0  -4  -4   18.90   15.80
   0  -4  -4   55.09   14.60
   0   4   4   27.60   19.90
   0   4   4   40.20   18.30
   0   4   4   31.50   14.10
   0   4   4   38.80    6.20
  -1  -4  -4   21.30   10.00
  -1  -4  -4   32.80   15.70
  -1  -4  -4    9.00    8.10
  -1  -4  -4   39.20   18.90
   1   4   4   22.30   17.00
   1   4   4   36.50   16.90
   1   4   4   13.40   13.50
   1   4   4   17.70   14.80
  -2  -4  -4  342.67   30.20
  -2  -4  -4  346.47   39.10
  -2  -4  -4  317.47   36.40
   2   4   4  319.07   35.60
   2   4   4  259.37   34.10
   2   4   4  380.36   36.20
   2   4   4  341.37   38.40
   2   4   4  323.47   30.20
  -3  -4  -4  459.05   46.10
  -3  -4  -4  517.35   42.00
  -3  -4  -4  563.04   50.49
   3   4   4  442.76   50.39
   3   4   4  526.65   40.30
   3   4   4  528.45   48.70
  -4  -4  -4  107.09   28.60
  -4  -4  -4  120.39   21.00
  -4  -4  -4   85.89   26.50
   4   4   4   88.49   25.50
   4   4   4  115.09   32.50
  -5  -4  -4 1592.64  113.09
  -5  -4  -4 1619.54  113.09
   5   4   4 1498.05  111.39
   5   4   4 1439.56  113.49
  -6  -4  -4   17.70   26.60
  -6  -4  -4   -6.00   27.40
   6   4   4   -4.70   32.70
   6   4   4    7.40   26.80
  -7  -4  -4  336.07   53.09
  -7  -4  -4  408.66   56.89
   7   4   4  354.76   60.79
   7   4   4  329.37   49.99
  -8  -4  -4   52.09   38.20
  -8  -4  -4    4.40   34.90
   8   4   4   -7.90   29.10
   8   4   4   12.40   47.20
   9  -5  -4   13.80   25.10
   9  -5  -4   12.30   29.80
  -9   5   4   70.99   33.90
   8  -5  -4  108.59   32.10
   8  -5  -4  100.29   30.50
  -8   5   4  182.48   41.10
  -8   5   4  101.49   52.09
   7  -5  -4   18.00   20.70
   7  -5  -4   50.59   24.30
  -7   5   4   15.00   45.60
   6  -5  -4   41.60   20.30
   6  -5  -4   48.70   20.90
  -6   5   4   70.49   42.40
   5  -5  -4  -16.20   15.00
   5  -5  -4   -9.10   14.10
   5  -5  -4   -0.80   15.00
   5  -5  -4   27.10   24.50
  -5   5   4   19.90   16.00
  -5   5   4    8.40   33.30
   4  -5  -4  843.72   61.99
   4  -5  -4  894.01   61.39
   4  -5  -4  806.62   57.59
   4  -5  -4  709.13   57.59
   4  -5  -4  796.52   58.59
  -4   5   4  835.72   60.19
  -4   5   4  764.22   74.19
  -4   5   4  815.12   61.79
   3  -5  -4   24.50   15.50
   3  -5  -4    4.10   14.90
   3  -5  -4    9.10    9.80
   3  -5  -4   30.20   13.20
   3  -5  -4    7.50   13.00
  -3   5   4   20.40   12.20
  -3   5   4   16.10   17.80
  -3   5   4    6.80   11.10
  -3   5   4   34.80   29.00
   2  -5  -4 1567.74  105.09
   2  -5  -4 1556.04  102.09
   2  -5  -4 1670.63  104.49
   2  -5  -4 1457.15   98.39
   2  -5  -4 1638.24   96.49
  -2   5   4 1442.76  113.89
  -2   5   4 1651.33  100.29
  -2   5   4 1651.03  102.49
  -2   5   4 1728.83  106.29
   1  -5  -4  153.28   23.80
   1  -5  -4  213.58   24.40
   1  -5  -4  164.08   15.50
   1  -5  -4  198.48   26.40
   1  -5  -4  160.78   15.60
  -1   5   4  146.89   25.30
  -1   5   4  224.48   35.80
  -1   5   4  110.49   19.90
  -1   5   4  138.29   15.60
   0  -5  -4  625.74   49.40
   0  -5  -4  600.04   48.30
   0  -5  -4  623.24   41.10
   0   5   4  535.15   36.50
   0   5   4  593.84   48.30
   0   5   4  600.44   47.90
   0   5   4  586.74   53.89
  -1  -5  -4  863.81   56.09
  -1  -5  -4  799.02   61.39
  -1  -5  -4  765.32   62.69
   1   5   4  904.51   65.49
   1   5   4  830.92   63.09
   1   5   4  695.23   60.69
   1   5   4  822.22   61.49
  -2  -5  -4  117.79   26.00
  -2  -5  -4   77.39   23.70
  -2  -5  -4  117.79   18.70
   2   5   4  111.69   26.60
   2   5   4   88.29   22.10
   2   5   4  127.69   21.80
  -3  -5  -4  315.37   40.00
  -3  -5  -4  280.27   30.30
  -3  -5  -4  241.68   35.50
   3   5   4  270.87   31.70
   3   5   4  249.88   36.90
  -4  -5  -4  456.95   53.29
  -4  -5  -4  505.25   54.39
   4   5   4  580.44   58.89
   4   5   4  428.36   55.49
  -5  -5  -4   -5.30   24.00
  -5  -5  -4   25.20   28.90
   5   5   4  -16.70   30.10
   5   5   4   29.60   26.30
  -6  -5  -4  119.69   38.90
  -6  -5  -4  130.89   37.90
   6   5   4  203.18   42.20
   6   5   4  127.69   48.20
  -7  -5  -4   42.30   37.50
  -7  -5  -4  171.38   40.90
   7   5   4  163.08   45.50
   7   5   4  178.18   54.39
  -8  -5  -4  -23.10   38.80
   8   5   4   23.20   39.50
   9  -6  -4   59.39   33.70
   9  -6  -4   24.10   29.30
  -9   6   4   74.99   41.90
   8  -6  -4  151.78   35.10
   8  -6  -4  189.88   37.80
  -8   6   4  124.79   53.19
  -8   6   4  174.38   43.50
   7  -6  -4  -12.40   20.00
   7  -6  -4   21.70   24.20
  -7   6   4   22.80   26.80
  -7   6   4  128.59   51.89
   6  -6  -4  417.56   46.40
   6  -6  -4  504.65   46.20
  -6   6   4  542.45   74.29
   5  -6  -4  111.99   25.60
   5  -6  -4  123.79   24.90
   5  -6  -4  109.59   22.40
  -5   6   4  101.09   23.90
  -5   6   4   91.89   42.10
   4  -6  -4  342.77   39.50
   4  -6  -4  273.27   33.00
   4  -6  -4  300.77   38.10
   4  -6  -4  365.16   34.50
   4  -6  -4  389.46   39.00
  -4   6   4  351.16   36.90
  -4   6   4  313.27   34.80
  -4   6   4  320.97   52.59
   3  -6  -4  216.38   30.10
   3  -6  -4  189.58   25.20
   3  -6  -4  214.98   23.00
   3  -6  -4  225.48   31.30
  -3   6   4  267.27   31.70
  -3   6   4  275.97   48.90
  -3   6   4  181.58   23.50
   2  -6  -4  125.09   23.90
   2  -6  -4  163.08   16.20
   2  -6  -4  138.79   21.90
   2  -6  -4  124.19   24.10
   2  -6  -4  206.98   22.90
  -2   6   4  164.68   20.10
  -2   6   4  161.38   27.30
  -2   6   4  140.59   39.50
  -2   6   4  181.18   22.80
   1  -6  -4   60.69   16.90
   1  -6  -4   37.30   17.90
   1  -6  -4   64.09   20.20
   1  -6  -4   59.59   10.90
  -1   6   4   44.00   19.50
  -1   6   4   36.00   10.90
  -1   6   4   41.00   28.10
  -1   6   4   49.50   16.80
   0  -6  -4 2508.65  144.89
   0  -6  -4 2390.66  151.68
   0  -6  -4 2343.57  151.68
   0  -6  -4 2409.36  148.29
   0   6   4 1987.10  152.08
   0   6   4 2442.96  151.08
   0   6   4 2302.57  150.88
   0   6   4 2501.65  158.08
  -1  -6  -4    8.90   20.00
  -1  -6  -4   -0.60   10.10
  -1  -6  -4    1.40   17.10
   1   6   4  -24.10   22.20
   1   6   4    4.20   18.80
   1   6   4   -7.70   15.80
   1   6   4   19.20   18.50
  -2  -6  -4 1897.61  132.19
  -2  -6  -4 2048.40  125.59
  -2  -6  -4 1786.72  130.99
   2   6   4 2002.20  134.99
   2   6   4 1925.81  131.79
   2   6   4 2136.09  130.49
  -3  -6  -4   97.99   30.70
  -3  -6  -4   99.89   20.10
  -3  -6  -4   54.79   27.20
   3   6   4  114.69   23.90
   3   6   4  114.49   29.70
  -4  -6  -4  382.66   50.69
  -4  -6  -4  496.65   55.89
   4   6   4  450.85   53.39
  -5  -6  -4  367.66   49.99
  -5  -6  -4  296.97   49.00
   5   6   4  287.27   48.40
  -6  -6  -4   -5.60   32.50
  -6  -6  -4   -7.30   32.40
   6   6   4   20.30   32.50
  -7  -6  -4  243.98   49.80
  -7  -6  -4  182.88   45.70
   7   6   4  223.18   49.80
   8  -7  -4    3.50   27.00
   8  -7  -4   32.90   27.40
  -8   7   4   65.29   36.00
  -8   7   4  -16.90   47.50
   7  -7  -4 1109.59   83.19
   7  -7  -4 1082.39   83.29
  -7   7   4  963.40  104.99
   6  -7  -4   92.29   30.60
   6  -7  -4   80.49   24.80
   6  -7  -4   27.30   20.90
  -6   7   4   63.99   28.10
  -6   7   4   52.79   45.50
   5  -7  -4  587.94   58.39
   5  -7  -4  518.55   47.60
   5  -7  -4  423.26   43.90
  -5   7   4  506.95   71.79
  -5   7   4  539.65   51.69
   4  -7  -4  889.81   70.09
   4  -7  -4  872.31   70.49
   4  -7  -4  858.71   68.09
   4  -7  -4  856.01   63.79
  -4   7   4  766.32   75.39
  -4   7   4 1018.30   68.09
  -4   7   4  751.32   65.09
  -4   7   4  873.21   84.79
   3  -7  -4   14.10   20.80
   3  -7  -4   43.30   17.10
   3  -7  -4   11.50   16.80
  -3   7   4    1.80   14.00
  -3   7   4   38.40   19.90
  -3   7   4   10.80   33.40
  -3   7   4   43.70   15.60
   2  -7  -4 1300.77   88.29
   2  -7  -4 1241.08   82.09
   2  -7  -4 1125.59   86.39
  -2   7   4 1160.58   85.19
  -2   7   4 1218.88  101.59
   1  -7  -4  170.68   20.40
   1  -7  -4  229.98   27.80
   1  -7  -4  201.38   30.50
   1  -7  -4  205.28   31.60
  -1   7   4  201.98   44.60
  -1   7   4  184.38   26.00
  -1   7   4  200.08   31.70
   0  -7  -4  547.85   52.59
   0  -7  -4  592.44   47.00
   0  -7  -4  542.95   42.70
   0  -7  -4  561.94   53.69
   0   7   4  590.84   50.39
   0   7   4  564.14   51.29
   0   7   4  579.24   60.59
   0   7   4  521.05   55.99
  -1  -7  -4  257.37   38.90
  -1  -7  -4  285.57   40.00
  -1  -7  -4  217.38   26.00
   1   7   4  282.27   45.80
   1   7   4  281.87   40.70
   1   7   4  275.97   37.60
  -2  -7  -4    0.20   13.90
  -2  -7  -4   -4.90   22.90
  -2  -7  -4   15.60   22.90
   2   7   4   -5.60   27.50
   2   7   4    8.60   22.20
   2   7   4   37.90   20.90
  -3  -7  -4   14.10   26.20
  -3  -7  -4  -21.00   22.50
   3   7   4  -16.90   22.00
  -4  -7  -4  520.25   62.99
  -4  -7  -4  624.44   66.19
   4   7   4  667.33   70.29
  -5  -7  -4   93.79   35.50
  -5  -7  -4   37.20   34.30
   5   7   4   74.39   37.20
  -6  -7  -4  652.23   73.89
  -6  -7  -4  626.34   76.29
   6   7   4  845.42   83.89
   8  -8  -4   -8.60   28.40
  -8   8   4   10.20   37.40
   7  -8  -4   23.90   24.50
  -7   8   4   34.20   32.10
  -7   8   4  -11.80   46.50
   6  -8  -4   21.60   22.70
   6  -8  -4   -6.00   27.40
  -6   8   4   17.90   46.80
  -6   8   4   21.10   28.10
   5  -8  -4  390.86   51.09
   5  -8  -4  378.06   41.40
  -5   8   4  347.97   63.59
  -5   8   4  355.46   44.60
   4  -8  -4   52.49   28.20
   4  -8  -4   96.69   29.10
   4  -8  -4   73.29   21.60
   4  -8  -4   70.29   25.70
  -4   8   4   62.29   22.60
  -4   8   4   46.00   42.70
   3  -8  -4 1514.55  103.59
   3  -8  -4 1303.27   92.39
   3  -8  -4 1491.25  100.49
  -3   8   4 1252.97  112.59
  -3   8   4 1318.47   94.79
   2  -8  -4   21.00   15.40
   2  -8  -4   27.60   22.40
   2  -8  -4   -4.20   22.20
  -2   8   4   30.10   19.90
  -2   8   4  -55.69   31.10
   1  -8  -4  604.74   59.39
   1  -8  -4  491.85   43.90
   1  -8  -4  516.55   53.39
  -1   8   4  483.95   61.29
  -1   8   4  553.74   69.59
  -1   8   4  500.25   46.60
   0  -8  -4  314.17   40.80
   0  -8  -4  204.58   25.30
   0  -8  -4  281.47   40.60
   0  -8  -4  243.28   30.80
   0   8   4  182.28   41.60
   0   8   4  260.57   49.70
   0   8   4  295.97   36.70
  -1  -8  -4   28.80   15.80
  -1  -8  -4   36.50   24.90
  -1  -8  -4   21.80   18.40
  -1  -8  -4    3.40   26.30
   1   8   4  -20.60   25.20
   1   8   4    5.40   30.00
   1   8   4   25.70   22.50
  -2  -8  -4  681.23   67.69
  -2  -8  -4  641.14   69.29
   2   8   4  723.83   63.59
   2   8   4  696.73   78.19
   2   8   4  682.13   65.29
  -3  -8  -4   77.09   33.10
  -3  -8  -4   70.49   33.70
   3   8   4  112.19   35.80
  -4  -8  -4  186.08   43.40
  -4  -8  -4  251.67   45.70
   4   8   4  251.97   49.50
  -5  -8  -4   99.69   37.60
  -5  -8  -4   44.50   39.00
   5   8   4   90.29   39.60
  -6  -8  -4   65.09   42.60
   6   8   4   24.50   41.50
   7  -9  -4  383.36   52.49
  -7   9   4  603.64   81.49
   6  -9  -4   36.60   32.20
   6  -9  -4    8.00   23.00
  -6   9   4   22.20   46.20
  -6   9   4   79.59   33.90
   5  -9  -4  282.87   48.90
   5  -9  -4  293.77   38.90
  -5   9   4  203.78   56.79
   4  -9  -4  152.98   39.70
   4  -9  -4  115.39   32.00
   4  -9  -4  112.59   25.00
  -4   9   4  137.39   53.49
   3  -9  -4    6.50   16.30
   3  -9  -4   34.80   24.90
   3  -9  -4   12.00   28.60
  -3   9   4  -33.10   42.70
   2  -9  -4  -16.40   22.00
   2  -9  -4   30.20   17.40
   2  -9  -4   10.60   29.50
  -2   9   4   -4.60   42.70
   1  -9  -4  284.77   41.30
   1  -9  -4  314.97   47.10
  -1   9   4  250.27   49.10
  -1   9   4  432.46   66.99
   0  -9  -4   -4.00   26.60
   0  -9  -4   26.20   25.20
   0   9   4   -9.80   38.50
   0   9   4  -29.10   29.60
   0   9   4    0.70   19.40
  -1  -9  -4  983.10   74.69
  -1  -9  -4  849.61   80.89
   1   9   4  774.12   69.69
   1   9   4  657.53   73.79
   1   9   4  833.42   91.79
  -2  -9  -4   23.80   29.10
  -2  -9  -4  -43.90   29.70
   2   9   4   -0.60   35.60
   2   9   4    9.30   28.70
   2   9   4   26.60   24.90
  -3  -9  -4  597.74   64.09
  -3  -9  -4  414.56   59.79
   3   9   4  487.25   59.99
  -4  -9  -4  127.09   44.50
   4   9   4  278.87   53.49
  -5  -9  -4   22.70   40.30
   5   9   4   35.20   41.30
   6 -10  -4  211.48   37.60
   6 -10  -4  219.68   47.30
  -6  10   4  191.88   57.79
   5 -10  -4  154.68   42.00
  -5  10   4  187.68   61.79
   4 -10  -4  130.39   40.40
  -4  10   4   84.19   51.79
   3 -10  -4  544.65   67.19
   3 -10  -4  664.33   65.89
   3 -10  -4  509.45   65.89
  -3  10   4  534.35   79.19
   2 -10  -4   30.70   32.80
   2 -10  -4   44.80   28.80
  -2  10   4   33.80   49.80
  -2  10   4   13.40   41.60
   1 -10  -4  512.65   60.89
   1 -10  -4  419.86   50.29
  -1  10   4  343.77   61.99
  -1  10   4  433.16   70.39
   0 -10  -4  -15.30   24.00
   0 -10  -4  -24.20   28.90
   0  10   4   43.60   44.50
   0  10   4   -3.40   33.00
  -1 -10  -4    8.50   33.30
  -1 -10  -4   73.59   30.90
   1  10   4   74.19   32.70
   1  10   4   23.20   40.80
   1  10   4   55.79   26.70
  -2 -10  -4    1.70   35.40
  -2 -10  -4    4.80   28.50
   2  10   4   37.10   30.90
  -3 -10  -4   65.79   42.20
   3  10   4  111.79   38.90
  -4 -10  -4   31.10   38.90
   4  10   4   17.30   38.00
   5 -11  -4   17.10   35.60
  -5  11   4   30.20   49.99
   4 -11  -4  337.67   58.29
  -4  11   4  420.06   74.49
   3 -11  -4    5.70   33.20
   3 -11  -4   51.09   30.00
  -3  11   4   40.80   49.80
  -3  11   4   51.39   51.19
   2 -11  -4  448.56   61.89
   2 -11  -4  414.56   52.49
  -2  11   4  277.97   67.59
  -2  11   4  519.75   85.69
   1 -11  -4   64.69   33.50
   1 -11  -4  107.19   41.90
  -1  11   4   73.19   45.50
  -1  11   4  146.79   57.59
   0 -11  -4  117.39   33.70
   0 -11  -4  111.59   42.10
   0  11   4   35.10   37.60
   0  11   4   24.50   48.30
  -1 -11  -4  500.05   65.19
  -1 -11  -4  303.77   69.19
   1  11   4  292.77   66.59
   1  11   4  365.36   53.89
  -2 -11  -4   19.40   40.00
   2  11   4   24.30   33.70
  -3 -11  -4   83.09   51.09
   3  11   4  104.19   42.50
   3 -12  -4  -27.70   37.40
  -3  12   4   33.70   52.99
  -3  12   4    2.50   58.59
   2 -12  -4  -18.30   30.10
   2 -12  -4   67.79   41.90
  -2  12   4   77.49   58.39
  -2  12   4   17.20   44.50
   1 -12  -4  -79.89   36.00
   1 -12  -4   58.29   32.80
  -1  12   4   24.40   50.29
  -1  12   4   -7.70   37.00
   0 -12  -4  580.94   77.79
   0  12   4  516.85   82.59
  -1 -12  -4   34.30   65.69
   2  13  -5  180.28   58.39
  -2 -13   5  219.38   46.20
   1  13  -5   88.69   39.60
   0  13  -5   51.19   38.80
   0 -13   5   28.80   26.80
  -1  13  -5  388.76   57.49
   1 -13   5  287.77   61.59
   1 -13   5  453.75   54.59
  -2  13  -5  172.68   43.60
   2 -13   5  130.09   37.00
   2 -13   5  -20.20   47.30
   4  12  -5   -0.80   41.10
  -4 -12   5   60.39   39.50
   3  12  -5   32.80   43.40
  -3 -12   5   29.60   34.20
   2  12  -5  301.77   57.69
  -2 -12   5  246.58   48.50
   1  12  -5  -10.00   32.90
  -1 -12   5   34.70   24.00
  -1 -12   5   -2.20   29.90
   0  12  -5  518.45   66.79
   0 -12   5  409.36   63.29
   0 -12   5  533.15   55.59
  -1  12  -5   22.20   31.50
   1 -12   5  -14.50   24.30
   1 -12   5   36.30   39.10
  -2  12  -5  457.75   60.99
   2 -12   5  389.66   59.49
   2 -12   5  410.26   48.80
  -3  12  -5  170.98   53.39
  -3  12  -5  165.48   42.60
   3 -12   5  108.59   51.89
   3 -12   5  128.99   38.30
  -4  12  -5   63.39   44.10
  -4  12  -5   75.79   35.00
   4 -12   5  136.09   49.80
   5  11  -5   46.60   47.40
  -5 -11   5   33.20   32.70
   4  11  -5  365.26   62.09
  -4 -11   5  397.06   61.29
   3  11  -5    3.30   34.10
  -3 -11   5   12.50   31.10
   2  11  -5  670.73   75.79
  -2 -11   5  662.83   69.89
   1  11  -5   16.70   28.80
  -1 -11   5   10.80   27.90
  -1 -11   5   33.90   22.90
   0  11  -5  162.18   41.00
   0 -11   5  197.28   41.10
   0 -11   5  159.48   31.40
  -1  11  -5   79.29   33.00
  -1  11  -5   78.49   33.50
   1 -11   5   32.70   25.50
   1 -11   5   62.29   37.60
  -2  11  -5   97.09   40.50
  -2  11  -5  152.28   39.90
   2 -11   5  190.98   43.10
   2 -11   5   85.69   26.90
  -3  11  -5   59.79   30.10
  -3  11  -5   15.90   37.40
   3 -11   5  -25.70   22.50
   3 -11   5  -10.60   34.20
  -4  11  -5  460.55   64.79
  -4  11  -5  335.67   54.19
   4 -11   5  368.46   58.49
  -5  11  -5  -35.20   38.90
   5 -11   5   -0.30   34.60
   6  10  -5  132.69   57.49
  -6 -10   5  222.98   50.99
   5  10  -5   79.89   48.90
  -5 -10   5   95.69   36.40
   4  10  -5   60.79   39.80
  -4 -10   5  124.09   40.70
   3  10  -5  356.66   57.29
  -3 -10   5  305.57   49.00
   2  10  -5  175.28   39.90
  -2 -10   5  187.98   30.30
  -2 -10   5  128.29   35.30
   1  10  -5  139.29   37.60
  -1 -10   5  160.38   37.90
  -1 -10   5   95.69   25.10
   0  10  -5 1134.89   92.69
   0  10  -5 1150.98   92.59
   0 -10   5 1228.38   86.19
   0 -10   5 1175.68   91.69
  -1  10  -5   10.90   27.40
  -1  10  -5   13.90   29.60
   1 -10   5   45.90   29.60
   1 -10   5   23.40   21.90
   1 -10   5   -2.40   22.20
  -2  10  -5  727.13   69.49
  -2  10  -5  749.33   74.89
   2 -10   5  771.72   74.79
   2 -10   5  788.92   65.99
  -3  10  -5   27.00   33.80
  -3  10  -5   22.90   26.40
   3 -10   5   16.00   24.00
   3 -10   5   25.90   35.10
  -4  10  -5   10.50   37.30
  -4  10  -5   65.19   31.70
   4 -10   5   24.70   34.90
  -5  10  -5   15.50   37.20
   5 -10   5  101.39   44.30
  -6  10  -5  167.28   51.59
   6 -10   5  325.57   57.49
   7   9  -5  468.35   85.19
  -7  -9   5  416.06   62.59
   6   9  -5   -9.70   42.00
  -6  -9   5   17.40   32.90
   5   9  -5  175.58   53.09
  -5  -9   5   93.99   35.40
   4   9  -5  246.58   50.89
  -4  -9   5  225.18   46.10
   3   9  -5  130.19   37.70
  -3  -9   5  141.59   35.10
   2   9  -5  275.17   36.00
   2   9  -5  247.18   43.60
  -2  -9   5  369.06   49.60
  -2  -9   5  267.17   32.60
   1   9  -5  550.24   60.39
   1   9  -5  491.15   55.69
  -1  -9   5  622.94   57.29
  -1  -9   5  552.04   47.80
   0   9  -5   12.30   24.90
   0   9  -5   39.00   23.80
   0  -9   5   30.00   18.50
   0  -9   5   13.20   21.40
  -1   9  -5 1110.89   87.69
  -1   9  -5 1118.79   90.19
  -1   9  -5 1104.49   87.39
   1  -9   5 1151.28   85.69
   1  -9   5 1201.48   82.69
   1  -9   5 1085.49   86.69
  -2   9  -5  281.17   43.10
  -2   9  -5  242.58   40.90
   2  -9   5  237.28   32.80
   2  -9   5  273.57   42.60
   2  -9   5  193.38   37.60
  -3   9  -5  206.38   43.00
  -3   9  -5  234.68   40.10
   3  -9   5  141.39   37.70
   3  -9   5  208.48   35.20
  -4   9  -5 1012.60   84.49
  -4   9  -5 1006.70   89.59
   4  -9   5 1144.79   90.99
  -5   9  -5   11.70   36.90
   5  -9   5   25.10   38.60
  -6   9  -5  713.33   86.09
   6  -9   5  961.70   89.99
  -7   9  -5   28.80   44.90
   7  -9   5   88.49   49.50
   7   8  -5   69.89   51.39
  -7  -8   5   37.50   35.50
   6   8  -5   19.50   43.20
  -6  -8   5   45.30   32.20
   5   8  -5  748.53   88.09
  -5  -8   5  725.33   72.99
   4   8  -5    7.00   21.00
   4   8  -5    7.20   26.50
  -4  -8   5   16.50   24.70
   3   8  -5 2285.47  159.68
  -3  -8   5 2411.36  158.08
   2   8  -5  -12.60   20.50
   2   8  -5   -0.70   16.00
  -2  -8   5  -12.10   20.10
  -2  -8   5   -9.40   13.10
  -2  -8   5   14.40   14.00
   1   8  -5  832.72   68.59
   1   8  -5  820.82   68.19
  -1  -8   5  798.12   60.59
  -1  -8   5  867.31   60.99
  -1  -8   5  866.31   69.49
   0   8  -5  307.57   41.30
   0   8  -5  215.38   28.30
   0   8  -5  335.47   41.00
   0   8  -5  351.36   41.30
   0  -8   5  213.68   28.40
   0  -8   5  282.87   31.70
   0  -8   5  450.95   46.60
  -1   8  -5   29.70   20.70
  -1   8  -5   44.50   25.60
  -1   8  -5   52.59   21.00
   1  -8   5   50.59   17.40
   1  -8   5   42.40   15.60
   1  -8   5   55.89   22.20
   1  -8   5   52.09   24.30
  -2   8  -5  463.15   45.20
  -2   8  -5  291.27   38.70
  -2   8  -5  451.45   49.90
   2  -8   5  456.95   49.99
   2  -8   5  381.26   44.80
   2  -8   5  351.56   37.30
   2  -8   5  387.96   40.80
  -3   8  -5  341.37   42.90
  -3   8  -5  309.37   44.60
   3  -8   5  268.77   44.30
   3  -8   5  327.47   39.10
   3  -8   5  346.57   40.00
  -4   8  -5   55.19   32.20
  -4   8  -5   93.69   29.70
   4  -8   5   93.89   35.30
  -5   8  -5  590.34   69.79
   5  -8   5  563.24   69.49
  -6   8  -5   -7.90   35.40
   6  -8   5    8.70   36.60
  -7   8  -5  157.08   48.30
   7  -8   5  179.78   53.39
   8   7  -5   46.80   53.89
  -8  -7   5  121.39   41.70
   7   7  -5  236.78   60.39
  -7  -7   5  334.07   57.49
   6   7  -5  273.77   59.99
  -6  -7   5  217.08   43.90
   5   7  -5  177.38   37.30
   5   7  -5  166.68   43.50
  -5  -7   5  198.88   42.20
   4   7  -5  486.95   53.49
   4   7  -5  558.14   64.19
  -4  -7   5  469.15   52.39
  -4  -7   5  478.85   44.50
   3   7  -5   16.00   21.90
  -3  -7   5   -6.10   17.60
  -3  -7   5   -2.60   10.80
  -3  -7   5  -18.10   12.10
   2   7  -5  123.69   16.20
   2   7  -5  156.98   30.40
   2   7  -5  131.79   25.40
  -2  -7   5  149.49   19.80
  -2  -7   5  165.08   22.10
  -2  -7   5  125.29   27.40
   1   7  -5  365.06   42.40
   1   7  -5  389.36   31.10
   1   7  -5  356.56   43.90
  -1  -7   5  291.07   31.90
  -1  -7   5  381.46   44.10
  -1  -7   5  382.46   32.40
   0   7  -5   24.50   21.60
   0   7  -5   -7.60   17.30
   0   7  -5   -2.60   14.90
   0  -7   5    3.00   16.90
   0  -7   5   -6.00   12.00
   0  -7   5   -4.70   11.20
  -1   7  -5 1783.52  114.39
  -1   7  -5 1754.62  113.69
  -1   7  -5 1655.73  116.09
   1  -7   5 1776.12  110.29
   1  -7   5 1614.94  108.79
   1  -7   5 1686.83  113.99
   1  -7   5 1646.24  113.19
  -2   7  -5   18.40   18.90
  -2   7  -5   14.90   18.60
  -2   7  -5   23.50   20.70
   2  -7   5   35.80   17.30
   2  -7   5   36.90   18.30
   2  -7   5   10.80   19.70
   2  -7   5   11.50   21.30
  -3   7  -5 1001.10   74.19
  -3   7  -5 1042.40   79.29
  -3   7  -5 1012.10   74.39
   3  -7   5  876.01   77.39
   3  -7   5 1020.10   78.09
  -4   7  -5   76.39   25.90
  -4   7  -5   51.29   27.50
   4  -7   5   44.50   16.50
   4  -7   5   27.20   26.40
  -5   7  -5    0.10   25.90
   5  -7   5   -8.70   16.80
   5  -7   5  -26.70   30.10
  -6   7  -5   68.69   35.20
   6  -7   5  115.79   41.10
   6  -7   5   86.19   25.70
  -7   7  -5  243.48   51.29
   7  -7   5  151.48   53.99
  -8   7  -5   31.60   41.30
   8  -7   5   41.80   46.50
   8   6  -5  471.35   85.19
  -8  -6   5  678.73   67.39
  -8  -6   5  680.83   71.99
   7   6  -5   17.00   42.90
  -7  -6   5   47.80   32.50
   6   6  -5  764.32   90.29
  -6  -6   5  815.42   74.29
   5   6  -5   58.99   15.70
   5   6  -5   90.59   37.50
   5   6  -5   71.09   24.50
  -5  -6   5   52.69   17.00
  -5  -6   5   55.59   26.20
   4   6  -5  132.99   18.00
   4   6  -5  104.99   24.00
   4   6  -5  109.39   31.40
  -4  -6   5  114.19   28.20
  -4  -6   5  119.39   19.00
   3   6  -5  202.98   34.60
   3   6  -5  170.68   19.80
  -3  -6   5  182.98   22.90
  -3  -6   5  158.48   29.90
  -3  -6   5  227.28   21.60
   2   6  -5  346.77   41.00
   2   6  -5  287.17   35.80
   2   6  -5  327.37   27.10
  -2  -6   5  338.77   27.40
  -2  -6   5  317.37   38.10
  -2  -6   5  290.37   29.00
   1   6  -5  189.98   23.10
   1   6  -5  205.18   29.00
   1   6  -5  225.28   32.90
  -1  -6   5  213.78   23.40
  -1  -6   5  243.18   22.80
  -1  -6   5  226.98   31.70
   0   6  -5  870.81   74.59
   0   6  -5 1033.40   72.29
   0   6  -5 1045.20   75.89
   0  -6   5 1111.99   75.79
   0  -6   5 1129.49   69.29
   0  -6   5 1019.60   69.99
  -1   6  -5    6.30   13.70
  -1   6  -5    5.20   18.50
  -1   6  -5    1.50   14.30
   1  -6   5   -0.10   15.80
   1  -6   5   20.90   16.60
   1  -6   5    4.80   11.30
   1  -6   5   13.80   11.40
   1  -6   5   -4.90    8.60
  -2   6  -5  589.74   47.70
  -2   6  -5  616.74   50.79
  -2   6  -5  542.25   48.70
   2  -6   5  606.94   46.10
   2  -6   5  529.45   48.40
   2  -6   5  628.24   46.70
   2  -6   5  528.25   51.69
  -3   6  -5  705.03   58.69
  -3   6  -5  646.34   55.19
  -3   6  -5  708.23   54.59
   3  -6   5  723.93   58.69
   3  -6   5  676.73   60.19
  -4   6  -5  233.98   33.40
  -4   6  -5  231.38   38.10
  -4   6  -5  277.27   33.10
   4  -6   5  257.57   28.50
   4  -6   5  200.88   37.00
   4  -6   5  159.28   31.80
  -5   6  -5 1393.46   97.29
   5  -6   5 1302.17   86.79
   5  -6   5 1053.29   96.79
  -6   6  -5   50.09   32.30
   6  -6   5   80.29   24.30
   6  -6   5  -15.10   31.20
  -7   6  -5  484.55   64.59
   7  -6   5  583.84   74.89
  -8   6  -5  -12.90   38.30
   8  -6   5    0.50   42.70
   9   5  -5   59.69   51.39
  -9  -5   5  155.98   37.10
   8   5  -5   43.30   50.19
  -8  -5   5   24.30   30.60
  -8  -5   5   34.20   29.50
   7   5  -5  289.67   64.79
   7   5  -5  448.16   43.10
  -7  -5   5  634.34   66.49
   6   5  -5  346.37   36.70
   6   5  -5  357.56   60.29
  -6  -5   5  352.36   35.20
  -6  -5   5  366.96   48.50
   5   5  -5   70.29   16.30
   5   5  -5   31.20   30.30
  -5  -5   5   26.50   24.90
  -5  -5   5   85.49   16.90
   4   5  -5 1943.11  132.89
   4   5  -5 1899.21  119.19
  -4  -5   5 1985.90  119.59
  -4  -5   5 1804.52  126.59
   3   5  -5   91.79   14.80
   3   5  -5   62.39   21.70
  -3  -5   5   69.79   20.70
  -3  -5   5   84.39   11.70
  -3  -5   5   87.79   15.50
   2   5  -5 2269.67  134.79
   2   5  -5 2251.77  141.09
   2   5  -5 1949.30  139.69
  -2  -5   5 2255.77  135.09
  -2  -5   5 2134.59  140.69
  -2  -5   5 2246.38  132.29
   1   5  -5  351.36   39.50
   1   5  -5  350.16   31.40
   1   5  -5  354.56   32.90
  -1  -5   5  368.86   27.40
  -1  -5   5  339.77   34.60
  -1  -5   5  349.87   30.40
   0   5  -5  500.15   46.00
   0   5  -5  535.45   45.10
   0   5  -5  521.35   41.20
   0  -5   5  523.95   39.80
   0  -5   5  566.24   45.70
   0  -5   5  568.54   38.90
  -1   5  -5 1376.56   90.89
  -1   5  -5 1220.28   87.29
  -1   5  -5 1370.06   86.89
   1  -5   5 1289.27   85.89
   1  -5   5 1299.17   90.29
   1  -5   5 1327.07   83.19
   1  -5   5 1349.86   87.89
   1  -5   5 1353.86   85.39
  -2   5  -5   17.30   13.30
  -2   5  -5   15.30   16.40
  -2   5  -5   17.90   14.00
   2  -5   5    1.20    9.10
   2  -5   5   11.00   20.10
   2  -5   5   10.40   16.30
   2  -5   5   -7.60   11.70
  -3   5  -5  639.94   49.20
  -3   5  -5  682.33   54.19
  -3   5  -5  588.24   45.90
   3  -5   5  501.45   50.29
   3  -5   5  546.35   53.39
  -4   5  -5  624.94   51.59
  -4   5  -5  591.84   53.09
  -4   5  -5  570.84   52.99
   4  -5   5  598.34   45.50
   4  -5   5  571.04   56.09
   4  -5   5  507.75   50.89
  -5   5  -5   26.90   24.20
   5  -5   5   38.30   28.30
   5  -5   5   45.00   19.10
  -6   5  -5  418.06   52.29
   6  -5   5  348.37   54.59
   6  -5   5  285.67   37.50
  -7   5  -5  237.78   47.50
   7  -5   5  216.68   49.30
  -8   5  -5   25.30   36.10
   8  -5   5   91.79   44.90
   9   4  -5    2.90   53.59
  -9  -4   5  301.77   59.19
   8   4  -5  280.07   66.19
   8   4  -5  547.65   50.89
  -8  -4   5  645.14   63.79
   7   4  -5   -4.30   17.40
   7   4  -5  -18.20   39.60
  -7  -4   5   50.69   27.60
  -7  -4   5    9.50   24.10
   6   4  -5  974.10   97.69
   6   4  -5 1095.79   79.79
   6   4  -5 1191.88   78.79
  -6  -4   5 1131.29   85.89
   5   4  -5   63.99   29.80
   5   4  -5   44.60   11.20
   5   4  -5   29.00   13.40
  -5  -4   5   36.60   22.10
  -5  -4   5   20.00   11.30
   4   4  -5  164.58   32.80
   4   4  -5  149.49   20.60
   4   4  -5  178.28   16.20
  -4  -4   5  195.88   28.70
  -4  -4   5  139.79   17.60
   3   4  -5  289.57   36.90
   3   4  -5  241.28   23.20
   3   4  -5  228.18   17.50
  -3  -4   5  208.88   21.30
  -3  -4   5  220.78   30.10
   2   4  -5  462.15   44.30
   2   4  -5  530.55   32.60
   2   4  -5  508.45   43.60
   2   4  -5  576.04   39.50
  -2  -4   5  478.45   42.60
  -2  -4   5  522.15   38.00
  -2  -4   5  533.15   34.10
   1   4  -5   73.99   15.70
   1   4  -5  104.79   21.40
   1   4  -5   72.79   15.50
   1   4  -5  100.29    9.10
  -1  -4   5   93.49   11.10
  -1  -4   5  102.69   21.00
  -1  -4   5  101.29   14.60
   0   4  -5 3865.81  254.77
   0   4  -5 4060.29  253.87
   0   4  -5 4100.49  251.07
   0  -4   5 4288.37  248.78
   0  -4   5 4175.48  254.67
   0  -4   5 4502.45  251.57
   0  -4   5 4431.56  250.67
   0  -4   5 4062.09  249.88
  -1   4  -5  419.36   32.90
  -1   4  -5  427.06   37.70
  -1   4  -5  423.46   36.90
   1  -4   5  411.56   40.00
   1  -4   5  404.96   35.80
   1  -4   5  416.16   34.10
   1  -4   5  449.66   31.90
  -2   4  -5 3256.97  189.98
  -2   4  -5 3070.49  194.08
  -2   4  -5 3046.10  192.18
   2  -4   5 2984.80  193.48
   2  -4   5 3159.18  197.78
   2  -4   5 3299.27  188.08
  -3   4  -5   17.10   14.20
  -3   4  -5    8.90   17.70
  -3   4  -5   -3.90   10.60
   3  -4   5  -18.50   18.70
   3  -4   5   -0.50   18.70
   3  -4   5    7.00   11.10
  -4   4  -5   44.80   21.00
  -4   4  -5   77.69   20.20
   4  -4   5   11.30   24.00
   4  -4   5   51.79   21.60
   4  -4   5   48.50   16.30
  -5   4  -5  286.67   39.90
  -5   4  -5  269.77   35.20
   5  -4   5  323.57   48.10
   5  -4   5  285.27   32.50
  -6   4  -5  172.88   35.90
   6  -4   5  128.59   26.60
   6  -4   5  154.68   40.30
  -7   4  -5  116.09   37.60
   7  -4   5   76.39   40.70
  -8   4  -5  360.06   55.79
   8  -4   5  268.67   54.99
   9   3  -5  327.37   65.49
   9   3  -5  314.87   42.60
  -9  -3   5  534.35   83.99
   8   3  -5  -48.10   40.30
   8   3  -5   34.60   19.70
   8   3  -5   26.50   22.10
  -8  -3   5   19.30   25.90
   7   3  -5  994.60   74.69
   7   3  -5  930.81   70.29
   7   3  -5 1018.00   99.89
  -7  -3   5  971.30   78.79
  -7  -3   5 1065.39   79.59
   6   3  -5   48.30   35.80
   6   3  -5   20.80   15.00
   6   3  -5   32.20   13.50
  -6  -3   5   66.89   23.70
  -6  -3   5   83.69   26.90
   5   3  -5  345.37   48.20
   5   3  -5  298.27   27.70
   5   3  -5  361.66   33.10
  -5  -3   5  320.47   27.30
  -5  -3   5  319.67   37.80
   4   3  -5  960.50   76.69
   4   3  -5  977.30   66.59
   4   3  -5  994.40   62.79
  -4  -3   5  962.10   70.39
  -4  -3   5  986.60   63.19
   3   3  -5  322.37   37.00
   3   3  -5  291.47   25.90
   3   3  -5  306.07   22.30
  -3  -3   5  281.37   30.10
  -3  -3   5  299.67   24.40
   2   3  -5 2198.18  143.69
   2   3  -5 2275.67  138.59
   2   3  -5 2203.38  141.09
   2   3  -5 2181.18  144.69
   2   3  -5 2336.17  136.89
  -2  -3   5 2323.67  144.39
  -2  -3   5 2418.26  142.99
  -2  -3   5 2378.86  139.09
  -2  -3   5 2341.27  135.19
   1   3  -5 1272.37   87.39
   1   3  -5 1300.67   81.29
   1   3  -5 1047.60   83.49
   1   3  -5 1350.06   84.29
   1   3  -5 1370.16   77.59
  -1  -3   5 1309.37   83.49
  -1  -3   5 1362.06   81.79
  -1  -3   5 1374.26   87.09
   0   3  -5  144.09   16.60
   0   3  -5  142.69   16.90
   0   3  -5  141.89   13.90
   0   3  -5  112.99   21.10
   0   3  -5  105.49   19.00
   0  -3   5  129.19   16.70
   0  -3   5  168.78   24.10
   0  -3   5  111.19   15.40
   0  -3   5  139.29   17.50
  -1   3  -5 1107.79   76.69
  -1   3  -5 1224.58   71.29
  -1   3  -5 1160.98   75.09
   1  -3   5 1041.70   72.39
   1  -3   5 1194.68   74.79
   1  -3   5 1167.18   74.39
   1  -3   5 1015.50   78.59
  -2   3  -5  657.83   48.80
  -2   3  -5  610.74   40.30
  -2   3  -5  634.94   45.20
   2  -3   5  603.24   48.70
   2  -3   5  605.54   51.49
   2  -3   5  538.95   41.60
  -3   3  -5  270.27   32.40
  -3   3  -5  249.28   23.80
  -3   3  -5  285.97   29.60
   3  -3   5  229.98   33.90
   3  -3   5  330.77   29.40
   3  -3   5  296.17   39.10
  -4   3  -5 2061.19  134.29
  -4   3  -5 2001.00  130.99
   4  -3   5 2201.18  129.39
   4  -3   5 2044.00  135.79
   4  -3   5 1929.51  138.09
  -5   3  -5   70.89   19.70
  -5   3  -5   69.79   25.40
   5  -3   5   37.90   28.40
  -6   3  -5 1684.43  121.19
   6  -3   5 1821.92  129.19
  -7   3  -5   -0.10   27.60
   7  -3   5   39.00   35.50
  -8   3  -5  258.27   48.90
   8  -3   5  284.67   60.99
  -9   3  -5   93.69   48.10
   9   2  -5  167.48   31.40
   9   2  -5  156.28   34.30
  -9  -2   5  220.88   61.19
   8   2  -5   -7.50   18.30
   8   2  -5   15.00   20.70
   8   2  -5  -32.10   39.80
  -8  -2   5   58.19   43.90
  -8  -2   5   27.90   26.10
   7   2  -5    6.60   15.70
   7   2  -5   30.90   38.90
   7   2  -5   15.10   19.00
  -7  -2   5   23.70   23.80
   6   2  -5   -6.30   12.10
   6   2  -5  -15.60   12.80
   6   2  -5   11.80   31.50
  -6  -2   5   -4.30   20.30
  -6  -2   5   31.50   18.70
   5   2  -5 1744.73  125.39
   5   2  -5 1828.92  109.09
   5   2  -5 1560.84  110.69
  -5  -2   5 1810.72  115.09
  -5  -2   5 1632.14  105.49
  -5  -2   5 1835.22  114.09
   4   2  -5   69.79   24.40
   4   2  -5   47.30   13.70
   4   2  -5   58.99   12.10
  -4  -2   5   53.09   17.90
  -4  -2   5   54.99    9.50
  -4  -2   5   50.49   16.80
   3   2  -5 6432.76  384.36
   3   2  -5 6436.46  393.26
   3   2  -5 6619.74  383.76
   3   2  -5 6527.95  387.26
  -3  -2   5 6663.33  383.96
  -3  -2   5 6655.93  389.96
  -3  -2   5 6362.16  388.66
   2   2  -5  775.72   49.10
   2   2  -5  711.23   55.19
   2   2  -5  779.72   52.69
   2   2  -5  776.82   49.20
   2   2  -5  687.33   55.09
   2   2  -5  815.02   47.40
  -2  -2   5  751.52   55.09
  -2  -2   5  806.02   49.70
  -2  -2   5  750.22   53.79
   1   2  -5 2742.33  159.18
   1   2  -5 2700.23  161.78
   1   2  -5 2627.94  164.68
   1   2  -5 2647.73  157.88
  -1  -2   5 2640.84  157.98
  -1  -2   5 2657.73  158.98
  -1  -2   5 2604.24  161.48
  -1  -2   5 2628.74  162.78
  -1  -2   5 2652.33  163.88
   0   2  -5  636.44   43.30
   0   2  -5  617.74   47.30
   0   2  -5  625.64   42.40
   0   2  -5  622.04   41.60
   0  -2   5  630.24   45.70
   0  -2   5  650.33   43.60
   0  -2   5  616.54   49.10
   0  -2   5  642.84   42.30
   0  -2   5  589.14   44.40
  -1   2  -5   18.20   12.10
  -1   2  -5   32.10    9.70
  -1   2  -5   28.80    6.70
  -1   2  -5   25.90   10.80
  -1   2  -5   17.20   13.00
   1  -2   5   64.49   21.60
   1  -2   5   16.00   11.10
   1  -2   5   22.60   13.00
   1  -2   5   25.40   11.60
  -2   2  -5 1060.19   60.69
  -2   2  -5 1106.39   69.79
  -2   2  -5 1093.79   67.49
   2  -2   5  835.22   68.49
   2  -2   5  901.71   64.79
   2  -2   5 1102.19   75.59
   2  -2   5  928.71   69.39
  -3   2  -5  385.76   37.10
  -3   2  -5  437.16   36.50
   3  -2   5  407.06   43.60
   3  -2   5  398.66   46.10
   3  -2   5  434.26   30.40
   3  -2   5  439.96   37.10
  -4   2  -5  563.44   46.40
  -4   2  -5  503.25   43.20
   4  -2   5  535.85   55.09
   4  -2   5  605.84   51.69
   4  -2   5  506.45   42.90
  -5   2  -5  151.58   24.10
  -5   2  -5  183.68   29.20
   5  -2   5  207.58   37.80
   5  -2   5  201.68   25.50
  -6   2  -5   -3.00   21.50
  -6   2  -5   12.40   18.20
   6  -2   5   50.29   32.90
  -7   2  -5   64.89   28.50
   7  -2   5   78.59   39.80
  -8   2  -5  274.67   47.20
   8  -2   5  293.77   58.09
  -9   2  -5   28.60   60.69
   9  -2   5  -54.29   63.79
   9   1  -5  468.95   53.49
   9   1  -5  280.77   39.40
  -9  -1   5  487.65   79.59
   8   1  -5   53.99   25.20
   8   1  -5   49.40   21.00
  -8  -1   5   97.59   40.60
  -8  -1   5  121.29   51.69
   7   1  -5 1086.79   73.39
   7   1  -5  812.42   92.59
   7   1  -5 1026.50   75.69
  -7  -1   5  998.20  100.89
  -7  -1   5 1037.10   78.39
   6   1  -5   -1.50   13.00
   6   1  -5  -22.20   12.30
   6   1  -5   18.60   30.20
  -6  -1   5   -8.40   16.50
  -6  -1   5    5.70   15.30
  -6  -1   5   14.10   15.40
   5   1  -5  687.23   52.39
   5   1  -5  751.32   50.89
   5   1  -5  681.93   66.09
  -5  -1   5  688.83   45.60
  -5  -1   5  719.03   55.69
  -5  -1   5  692.73   53.39
   4   1  -5  277.07   25.00
   4   1  -5  355.46   42.00
   4   1  -5  265.07   28.40
  -4  -1   5  311.67   33.50
  -4  -1   5  273.07   21.20
  -4  -1   5  282.97   29.00
   3   1  -5  380.76   25.00
   3   1  -5  348.57   30.40
   3   1  -5  377.76   38.70
   3   1  -5  332.77   27.30
   3   1  -5  387.86   26.90
  -3  -1   5  369.26   25.50
  -3  -1   5  347.97   32.90
  -3  -1   5  367.96   32.00
   2   1  -5  241.28   20.40
   2   1  -5  268.27   23.60
   2   1  -5  247.28   18.80
   2   1  -5  257.77   19.60
   2   1  -5  237.48   28.00
  -2  -1   5  241.08   24.90
  -2  -1   5  260.57   19.70
  -2  -1   5  265.17   26.20
   1   1  -5  699.33   43.60
   1   1  -5  705.13   46.60
   1   1  -5  661.03   49.10
   1   1  -5  608.84   43.70
   1   1  -5  621.64   47.30
  -1  -1   5  653.23   41.40
  -1  -1   5  618.64   49.50
  -1  -1   5  715.63   43.90
  -1  -1   5  680.73   47.80
  -1  -1   5  642.44   47.20
   0   1  -5   49.99   14.10
   0   1  -5   33.00    8.90
   0   1  -5   43.10    9.20
   0   1  -5   55.29   11.20
   0  -1   5   40.00   14.40
   0  -1   5   48.30   10.50
   0  -1   5   40.10   12.90
   0  -1   5   50.89   19.30
   0  -1   5   37.40   12.20
  -1   1  -5 3628.64  210.38
  -1   1  -5 3338.67  209.98
  -1   1  -5 3277.67  204.88
  -1   1  -5 3404.36  210.48
  -1   1  -5 3229.48  211.48
   1  -1   5 3760.22  211.68
   1  -1   5 3061.59  209.78
   1  -1   5 3866.11  218.18
   1  -1   5 3857.51  207.88
   1  -1   5 3664.53  211.88
  -2   1  -5   41.20   11.30
  -2   1  -5   53.09   14.80
  -2   1  -5   42.60   12.80
   2  -1   5   27.10   19.40
   2  -1   5   48.20   17.50
   2  -1   5   26.70   12.60
   2  -1   5   47.40   11.10
   2  -1   5   30.20   14.80
  -3   1  -5 1060.69   76.19
  -3   1  -5 1079.39   73.89
   3  -1   5 1078.59   81.59
   3  -1   5 1211.28   72.99
   3  -1   5 1124.69   80.39
   3  -1   5 1217.38   78.79
  -4   1  -5  311.07   30.30
  -4   1  -5  359.66   36.40
   4  -1   5  284.17   38.90
   4  -1   5  304.87   32.70
  -5   1  -5   26.20   15.60
  -5   1  -5   37.50   19.40
   5  -1   5   39.60   26.40
   5  -1   5   37.00   16.40
  -6   1  -5  181.58   31.70
   6  -1   5  161.28   43.00
   6  -1   5  248.48   32.00
  -7   1  -5  147.99   34.00
   7  -1   5  129.19   44.30
  -8   1  -5   76.99   37.80
   8  -1   5   80.19   47.60
   9  -1   5  -11.10   77.39
  10   0  -5   -5.80   39.90
  10   0  -5    3.40   25.40
   9   0  -5   24.20   27.10
   9   0  -5  102.89   28.00
  -9   0   5   18.50   53.29
   8   0  -5  537.85   55.99
   8   0  -5  520.15   49.20
  -8   0   5  488.05   77.29
   7   0  -5  106.69   24.50
   7   0  -5  122.29   26.00
  -7   0   5  138.29   31.90
  -7   0   5  143.29   50.59
   6   0  -5 1096.99   79.09
   6   0  -5 1164.88   96.59
   6   0  -5 1165.68   82.09
  -6   0   5 1140.49   83.89
  -6   0   5 1144.09   81.69
  -6   0   5 1334.37  101.89
   5   0  -5  293.87   45.10
   5   0  -5  365.86   34.80
   5   0  -5  398.36   33.20
  -5   0   5  438.16   42.60
  -5   0   5  391.26   53.69
  -5   0   5  405.46   34.70
   4   0  -5  242.88   36.00
   4   0  -5  192.18   22.50
   4   0  -5  208.98   25.10
  -4   0   5  250.07   25.90
  -4   0   5  248.38   29.80
  -4   0   5  247.48   16.80
  -4   0   5  231.78   41.10
   3   0  -5 2389.26  147.89
   3   0  -5 2446.06  147.49
   3   0  -5 2342.37  149.39
   3   0  -5 2513.65  143.59
   3   0  -5 2620.64  155.58
  -3   0   5 2370.06  151.38
  -3   0   5 2360.36  157.38
  -3   0   5 2452.05  150.08
  -3   0   5 2420.36  143.89
   2   0  -5   52.69   10.30
   2   0  -5   47.60    6.40
   2   0  -5   41.70    4.40
   2   0  -5   54.29   11.20
   2   0  -5   46.40   11.40
   2   0  -5   36.20   13.80
  -2   0   5   14.50   17.00
  -2   0   5   30.90   14.60
  -2   0   5   57.59   16.20
   1   0  -5  472.85   37.60
   1   0  -5  537.75   32.90
   1   0  -5  492.05   38.60
   1   0  -5  512.95   37.10
   1   0  -5  462.85   34.10
   1   0  -5  557.74   37.90
  -1   0   5  534.15   41.30
  -1   0   5  481.45   31.40
  -1   0   5  527.95   42.40
  -1   0   5  523.45   43.20
   0   0  -5  713.33   48.30
   0   0  -5  683.53   51.09
   0   0  -5  764.12   50.89
   0   0   5  778.72   51.59
   0   0   5  688.73   56.59
   0   0   5  754.82   47.80
   0   0   5  760.32   53.79
   0   0   5  687.73   49.20
  -1   0  -5    7.40   10.50
  -1   0  -5   24.30   11.50
   1   0   5   14.10   14.10
   1   0   5   25.60   18.10
   1   0   5    7.40   14.40
   1   0   5    5.70    9.40
   1   0   5    8.00   10.90
   1   0   5   19.90    9.50
  -2   0  -5  728.33   54.49
  -2   0  -5  778.32   51.29
  -2   0  -5  703.23   52.79
   2   0   5  788.32   50.99
   2   0   5  739.33   57.39
   2   0   5  834.12   54.19
   2   0   5  821.92   56.89
   2   0   5  732.33   59.99
  -3   0  -5 1012.40   64.99
  -3   0  -5  943.31   69.19
  -3   0  -5  994.30   67.29
   3   0   5 1065.19   76.49
   3   0   5  950.40   72.69
   3   0   5  988.10   65.99
   3   0   5  966.60   64.19
   3   0   5  979.40   71.09
  -4   0  -5   13.60   11.50
  -4   0  -5   16.80   15.10
  -4   0  -5  -12.20   14.30
   4   0   5    7.90   15.50
   4   0   5   -6.00   21.10
  -5   0  -5 2635.64  164.08
   5   0   5 2579.84  166.58
   5   0   5 2577.74  172.48
  -6   0  -5   24.30   20.80
  -6   0  -5   56.49   28.60
   6   0   5   24.70   32.90
   6   0   5    7.40   18.40
  -7   0  -5  528.95   63.89
   7   0   5  633.74   73.89
   7   0   5  572.24   71.19
  -8   0  -5  106.29   38.10
   8   0   5   64.89   46.30
  10  -1  -5  209.78   43.80
   9  -1  -5   23.20   22.90
   9  -1  -5   20.70   27.30
  -9   1   5  -30.50   49.10
   8  -1  -5    0.20   21.40
   8  -1  -5  -10.20   18.10
  -8   1   5   80.39   50.19
   7  -1  -5   -0.40   18.00
   7  -1  -5    7.00   17.50
  -7   1   5   35.30   38.70
  -7   1   5    9.40   28.20
   6  -1  -5  417.26   40.30
   6  -1  -5  415.16   38.20
  -6   1   5  494.35   63.49
  -6   1   5  418.86   46.30
  -6   1   5  423.06   40.60
   5  -1  -5   34.90   14.20
   5  -1  -5   17.40   13.90
  -5   1   5   40.30   14.90
  -5   1   5   60.79   34.20
  -5   1   5   77.09   22.90
   4  -1  -5 1679.53  108.39
   4  -1  -5 1677.43  107.19
   4  -1  -5 1773.62  107.79
  -4   1   5 1653.23  119.39
  -4   1   5 1719.23  107.79
  -4   1   5 1686.03  111.59
   3  -1  -5  187.18   22.10
   3  -1  -5  259.77   18.80
   3  -1  -5  236.58   23.80
   3  -1  -5  193.48   23.00
  -3   1   5  230.38   30.00
  -3   1   5  221.58   35.20
  -3   1   5  258.17   28.50
   2  -1  -5 3001.40  183.18
   2  -1  -5 3019.10  179.18
   2  -1  -5 3050.99  177.98
   2  -1  -5 3073.29  183.08
   2  -1  -5 2916.71  182.68
  -2   1   5 2847.71  186.68
  -2   1   5 3233.98  186.58
  -2   1   5 3059.89  189.88
   1  -1  -5 1222.58   72.99
   1  -1  -5 1086.59   76.59
   1  -1  -5 1126.89   76.09
   1  -1  -5 1160.28   73.19
  -1   1   5 1169.28   80.59
  -1   1   5 1300.67   81.39
  -1   1   5 1221.28   80.89
   0  -1  -5 1240.98   77.69
   0  -1  -5 1211.68   74.79
   0  -1  -5 1225.18   76.09
   0   1   5 1255.87   74.59
   0   1   5 1084.09   79.09
   0   1   5 1132.49   77.99
   0   1   5 1082.99   80.49
   0   1   5 1151.88   73.69
  -1  -1  -5 6961.70  386.36
  -1  -1  -5 6790.32  388.96
   1   1   5 6243.08  388.16
   1   1   5 6349.26  390.96
   1   1   5 7147.88  387.16
   1   1   5 6250.27  380.46
   1   1   5 6369.46  391.76
   1   1   5 6103.59  385.36
  -2  -1  -5   -4.10   10.20
  -2  -1  -5    3.60    7.90
  -2  -1  -5    2.70   12.80
   2   1   5    1.80    5.80
   2   1   5   25.40   16.10
   2   1   5    8.60    8.30
   2   1   5   23.50   19.00
   2   1   5    3.20   13.70
   2   1   5   -9.30   14.00
  -3  -1  -5 1806.62  113.89
  -3  -1  -5 1768.92  110.99
  -3  -1  -5 1601.44  117.59
   3   1   5 2036.40  121.69
   3   1   5 1963.60  116.19
   3   1   5 1783.22  119.59
   3   1   5 1800.02  110.79
  -4  -1  -5  317.27   38.00
  -4  -1  -5  313.07   31.20
   4   1   5  268.77   38.50
   4   1   5  270.47   34.40
  -5  -1  -5    4.80   21.10
   5   1   5   19.50   25.30
   5   1   5   29.40   21.40
  -6  -1  -5  191.68   38.30
   6   1   5  259.37   38.30
   6   1   5  268.67   46.10
  -7  -1  -5  124.79   38.00
   7   1   5  136.19   32.70
   7   1   5  120.99   48.90
  -8  -1  -5   26.10   38.40
   8   1   5   34.00   46.20
   9  -2  -5  -22.40   25.70
   9  -2  -5   17.80   23.70
  -9   2   5  -36.60   49.20
   8  -2  -5  513.05   53.19
   8  -2  -5  511.15   52.29
  -8   2   5  344.07   68.19
   7  -2  -5  -35.90   15.90
   7  -2  -5   15.30   19.70
  -7   2   5   10.70   38.00
   6  -2  -5 1583.64  105.59
   6  -2  -5 1632.74  106.89
  -6   2   5 1577.14  107.59
  -6   2   5 1627.74  125.29
  -6   2   5 1501.85  110.29
   5  -2  -5    3.20   14.10
   5  -2  -5    8.50   13.20
  -5   2   5   23.50   23.50
  -5   2   5    0.80   32.20
  -5   2   5   21.50   14.30
   4  -2  -5 1031.10   73.79
   4  -2  -5 1089.59   71.19
   4  -2  -5 1012.10   72.79
   4  -2  -5 1172.08   74.39
  -4   2   5 1264.67   82.39
  -4   2   5 1085.49   86.39
   3  -2  -5  203.58   18.60
   3  -2  -5  201.08   22.60
   3  -2  -5  159.88   21.10
   3  -2  -5  146.59   20.60
  -3   2   5  208.98   24.70
  -3   2   5  189.98   33.60
  -3   2   5  205.08   32.30
   2  -2  -5  423.46   29.10
   2  -2  -5  314.17   24.70
   2  -2  -5  418.76   33.00
   2  -2  -5  413.06   33.00
   2  -2  -5  394.66   31.30
  -2   2   5  493.85   43.20
  -2   2   5  460.25   42.10
  -2   2   5  399.46   34.90
   1  -2  -5  313.17   32.10
   1  -2  -5  376.76   29.60
   1  -2  -5  373.86   28.20
  -1   2   5  413.76   38.80
  -1   2   5  338.67   33.80
  -1   2   5  353.56   39.00
   0  -2  -5 4001.20  233.18
   0  -2  -5 4023.00  235.98
   0  -2  -5 3802.62  232.88
   0   2   5 3860.11  238.28
   0   2   5 4285.37  230.78
   0   2   5 3752.22  236.58
   0   2   5 4084.19  238.08
   0   2   5 3425.86  235.48
   0   2   5 3696.03  231.28
  -1  -2  -5  128.79   15.40
  -1  -2  -5  152.28   22.70
  -1  -2  -5  128.69   19.70
   1   2   5  133.29   25.00
   1   2   5  105.59   13.70
   1   2   5  117.09   20.10
   1   2   5   84.19   10.90
   1   2   5  114.29   23.20
   1   2   5  106.69   18.30
   1   2   5  112.19   21.80
  -2  -2  -5 2550.34  175.78
  -2  -2  -5 2809.12  170.18
   2   2   5 3026.10  176.78
   2   2   5 2814.32  172.38
   2   2   5 2861.31  175.48
   2   2   5 2912.91  166.88
   2   2   5 2760.82  177.88
  -3  -2  -5   45.00   19.80
  -3  -2  -5   88.89   17.00
   3   2   5   88.49   23.20
   3   2   5  119.39   21.20
   3   2   5   64.79   23.00
  -4  -2  -5  242.18   36.50
   4   2   5  233.28   33.00
   4   2   5  190.98   34.80
  -5  -2  -5  612.14   63.19
   5   2   5  693.53   65.09
   5   2   5  628.44   59.99
  -6  -2  -5  103.39   34.80
   6   2   5  120.99   39.30
   6   2   5  153.18   33.90
  -7  -2  -5  419.56   58.59
   7   2   5  341.97   60.39
   7   2   5  404.36   54.39
  -8  -2  -5   88.19   43.20
   8   2   5  109.09   50.39
   8   2   5  126.89   50.99
   9  -3  -5  155.48   34.90
   9  -3  -5  196.08   34.80
  -9   3   5   58.89   56.09
   8  -3  -5   96.19   29.20
   8  -3  -5   51.49   25.70
  -8   3   5   73.99   54.39
   7  -3  -5  584.34   54.69
   7  -3  -5  621.74   53.49
  -7   3   5  651.23   81.39
   6  -3  -5   60.29   18.90
   6  -3  -5   16.10   19.40
  -6   3   5   47.50   37.70
  -6   3   5    5.50   28.20
   5  -3  -5   46.50   17.60
   5  -3  -5   41.30   15.60
  -5   3   5   62.19   35.30
  -5   3   5   56.59   27.80
  -5   3   5   59.99   17.60
   4  -3  -5 1016.50   67.19
   4  -3  -5  997.90   68.49
   4  -3  -5  954.70   69.19
   4  -3  -5  939.71   68.09
  -4   3   5 1019.40   82.09
  -4   3   5 1108.29   77.19
  -4   3   5  978.50   68.99
   3  -3  -5   43.80   12.30
   3  -3  -5   47.20   13.10
   3  -3  -5   50.49   15.10
   3  -3  -5   41.50    8.70
   3  -3  -5   40.40   13.60
  -3   3   5   60.69   13.30
  -3   3   5   53.29   23.20
  -3   3   5   43.50   28.40
  -3   3   5   30.60   12.50
   2  -3  -5 2141.79  121.29
   2  -3  -5 1928.51  128.19
   2  -3  -5 2157.58  121.69
   2  -3  -5 1942.51  126.29
   2  -3  -5 2070.19  130.09
   2  -3  -5 2212.58  127.19
  -2   3   5 1827.22  131.89
  -2   3   5 2081.59  127.89
  -2   3   5 1896.71  135.59
  -2   3   5 2122.19  126.59
   1  -3  -5   26.10   10.10
   1  -3  -5   17.70   11.10
   1  -3  -5    0.40   13.90
  -1   3   5   21.10   22.80
  -1   3   5    2.10   19.10
  -1   3   5    5.70   13.90
  -1   3   5    9.10   15.60
   0  -3  -5 1193.28   82.99
   0  -3  -5 1158.18   85.69
   0  -3  -5 1199.88   80.99
   0   3   5 1391.56   89.89
   0   3   5 1245.88   88.09
   0   3   5 1312.17   87.59
   0   3   5 1387.16   78.59
  -1  -3  -5  100.69   22.50
  -1  -3  -5  132.19   21.60
   1   3   5  143.89   26.50
   1   3   5  148.59   26.80
   1   3   5  141.39   18.80
   1   3   5  141.09   25.00
   1   3   5  100.49   20.20
  -2  -3  -5  144.89   26.00
  -2  -3  -5  206.58   27.60
   2   3   5  133.09   25.20
   2   3   5  159.28   16.90
   2   3   5  166.38   27.60
   2   3   5  186.88   25.80
   2   3   5  137.79   27.50
  -3  -3  -5  -25.60   17.00
   3   3   5   16.00   19.00
   3   3   5   -6.70   20.50
  -4  -3  -5 1626.34  119.19
   4   3   5 1849.91  122.39
   4   3   5 1754.92  120.39
  -5  -3  -5  -12.70   25.80
   5   3   5    1.50   27.90
   5   3   5   22.80   25.30
  -6  -3  -5  776.82   77.29
   6   3   5  969.10   88.49
   6   3   5  926.21   79.99
  -7  -3  -5   72.79   37.50
   7   3   5  -33.60   36.80
   7   3   5   69.09   32.40
  -8  -3  -5  162.08   44.40
  -8  -3  -5  177.48   49.00
   8   3   5  186.18   43.00
   8   3   5   76.19   48.00
   9  -4  -5  176.88   35.60
   9  -4  -5   83.19   30.50
  -9   4   5   72.89   65.19
   8  -4  -5   24.50   24.60
   8  -4  -5   15.50   25.50
  -8   4   5   15.40   51.39
   7  -4  -5   62.29   25.70
   7  -4  -5   36.50   21.00
  -7   4   5  -27.70   46.10
   6  -4  -5    4.30   17.10
   6  -4  -5   46.00   20.00
  -6   4   5   10.70   41.90
   5  -4  -5  468.35   41.30
   5  -4  -5  382.96   40.30
   5  -4  -5  480.45   41.30
  -5   4   5  403.26   62.79
  -5   4   5  408.66   42.30
  -5   4   5  446.16   48.60
   4  -4  -5   50.89   15.50
   4  -4  -5   43.70   16.50
   4  -4  -5   44.90   14.80
   4  -4  -5   71.09   19.00
  -4   4   5   33.60   31.50
  -4   4   5   51.69   25.10
  -4   4   5   14.20   15.80
   3  -4  -5 3197.48  197.38
   3  -4  -5 3325.97  196.98
   3  -4  -5 3301.87  199.48
   3  -4  -5 3294.87  195.78
   3  -4  -5 3401.46  193.78
  -3   4   5 3132.59  198.68
  -3   4   5 3306.77  196.58
  -3   4   5 2892.31  206.68
  -3   4   5 3044.90  201.08
   2  -4  -5  212.48   26.10
   2  -4  -5  188.18   20.70
   2  -4  -5  200.78   26.70
   2  -4  -5  156.38   22.80
   2  -4  -5  191.58   14.40
  -2   4   5  236.38   38.90
  -2   4   5  120.79   28.30
  -2   4   5  202.88   20.90
  -2   4   5  133.79   25.00
   1  -4  -5 1190.18   76.89
   1  -4  -5 1262.27   75.39
   1  -4  -5 1255.27   81.79
   1  -4  -5 1275.87   82.19
   1  -4  -5 1142.89   84.09
  -1   4   5 1211.68   85.49
  -1   4   5 1089.99   89.09
  -1   4   5 1248.68   76.19
  -1   4   5 1211.38   85.09
   0  -4  -5 1306.07   80.19
   0  -4  -5 1120.99   86.79
   0  -4  -5 1136.49   84.19
   0  -4  -5 1275.47   79.69
   0   4   5 1271.87   89.29
   0   4   5 1113.09   89.39
   0   4   5 1293.97   76.89
   0   4   5 1388.36   89.89
   0   4   5 1358.86   76.59
  -1  -4  -5   33.50   19.90
  -1  -4  -5    7.20   13.90
  -1  -4  -5   21.00   10.50
   1   4   5   23.40   14.80
   1   4   5   60.89   22.40
   1   4   5   25.10   18.80
   1   4   5   14.90   17.60
  -2  -4  -5 1085.99   76.29
  -2  -4  -5  982.30   77.49
   2   4   5  994.40   77.69
   2   4   5 1125.49   79.49
   2   4   5  999.80   75.79
   2   4   5 1014.50   76.79
   2   4   5 1075.69   69.29
  -3  -4  -5   32.90   19.60
  -3  -4  -5    2.10   19.00
   3   4   5    1.70   22.10
   3   4   5   32.50   20.90
  -4  -4  -5  676.53   62.79
  -4  -4  -5  684.93   61.59
   4   4   5  678.23   63.89
   4   4   5  608.44   63.39
  -5  -4  -5  -20.00   22.20
  -5  -4  -5   15.80   28.10
   5   4   5   37.40   26.80
   5   4   5    6.10   32.00
  -6  -4  -5   40.60   31.50
  -6  -4  -5   15.00   29.80
   6   4   5   23.30   37.40
   6   4   5   27.00   30.10
  -7  -4  -5   10.40   33.30
  -7  -4  -5   28.50   35.20
   7   4   5   18.30   32.40
   7   4   5    7.50   43.60
  -8  -4  -5  331.57   57.79
  -8  -4  -5  135.59   61.89
   8   4   5  118.19   88.19
   8   4   5  257.17   50.79
   9  -5  -5  240.28   47.80
   9  -5  -5  271.77   44.50
  -9   5   5  398.66   58.69
   8  -5  -5   81.39   31.20
   8  -5  -5  106.79   29.60
  -8   5   5   11.10   50.59
   7  -5  -5 1015.80   80.79
   7  -5  -5 1073.39   81.39
  -7   5   5 1076.19  104.39
   6  -5  -5   24.30   19.90
   6  -5  -5   12.40   18.10
  -6   5   5    5.00   45.70
   5  -5  -5  625.34   53.29
   5  -5  -5  683.23   55.29
   5  -5  -5  712.03   54.29
  -5   5   5  692.33   79.99
  -5   5   5  641.34   56.49
  -5   5   5  676.63   59.69
   4  -5  -5   11.10   15.90
   4  -5  -5   15.20   14.60
   4  -5  -5   19.50   14.10
   4  -5  -5   23.60   17.70
  -4   5   5   -0.90   14.40
  -4   5   5  -18.70   34.10
  -4   5   5   27.30   24.40
   3  -5  -5   77.39   17.90
   3  -5  -5  122.79   23.30
   3  -5  -5   94.99   21.00
   3  -5  -5   87.99   21.50
   3  -5  -5  115.89   18.00
  -3   5   5   93.09   17.70
  -3   5   5   88.99   36.40
  -3   5   5   71.99   26.40
  -3   5   5   97.69   19.70
   2  -5  -5   43.50   19.10
   2  -5  -5   37.10   16.70
   2  -5  -5   43.80    7.90
   2  -5  -5   54.69   17.70
   2  -5  -5   66.79   12.90
  -2   5   5   35.70   17.20
  -2   5   5   63.29   13.30
  -2   5   5   67.69   32.90
  -2   5   5   19.20   23.20
   1  -5  -5   76.09   12.70
   1  -5  -5   73.49   19.90
   1  -5  -5   59.39   19.40
   1  -5  -5   71.49   10.90
   1  -5  -5   79.09   21.50
  -1   5   5   66.39   30.20
  -1   5   5   55.89   19.00
  -1   5   5   70.79   11.70
  -1   5   5   83.69   24.50
   0  -5  -5  333.77   38.90
   0  -5  -5  370.96   42.60
   0  -5  -5  344.77   29.40
   0   5   5  384.76   47.70
   0   5   5  357.96   41.60
   0   5   5  368.66   39.00
  -1  -5  -5 1081.69   81.09
  -1  -5  -5 1164.28   84.89
  -1  -5  -5 1094.39   75.19
   1   5   5 1129.59   86.29
   1   5   5 1102.39   83.59
   1   5   5 1185.98   84.99
   1   5   5 1195.48   80.19
  -2  -5  -5   29.20   19.90
  -2  -5  -5   37.80   14.00
  -2  -5  -5   16.30   22.90
   2   5   5   14.30   13.00
   2   5   5   24.70   19.90
   2   5   5   11.40   20.30
   2   5   5    1.10   18.90
  -3  -5  -5  654.43   61.69
  -3  -5  -5  642.14   50.89
  -3  -5  -5  707.83   59.49
   3   5   5  592.04   59.69
  -4  -5  -5  460.85   52.29
  -4  -5  -5  430.96   52.89
   4   5   5  454.15   57.09
   4   5   5  529.55   58.09
  -5  -5  -5   22.10   28.10
  -5  -5  -5   54.99   30.40
   5   5   5  -31.60   36.20
   5   5   5   33.90   29.80
  -6  -5  -5  431.26   57.39
  -6  -5  -5  363.36   52.09
   6   5   5  382.26   58.49
   6   5   5  454.45   65.09
  -7  -5  -5   19.30   34.50
  -7  -5  -5  -18.20   32.20
   7   5   5  -52.09   32.40
   8  -6  -5  337.37   44.70
   8  -6  -5  250.27   42.30
  -8   6   5  251.37   46.50
  -8   6   5  143.09   59.59
   7  -6  -5   -2.70   21.80
   7  -6  -5   40.50   23.90
  -7   6   5   27.40   53.99
   6  -6  -5  219.78   34.30
   6  -6  -5  152.18   32.00
   6  -6  -5  294.77   34.80
  -6   6   5  250.97   60.39
   5  -6  -5  357.76   40.00
   5  -6  -5  337.27   40.50
   5  -6  -5  378.46   39.60
  -5   6   5  320.77   65.29
   4  -6  -5   41.30   20.90
   4  -6  -5   47.10   20.30
   4  -6  -5   57.59   21.40
   4  -6  -5   18.20   15.00
  -4   6   5   70.19   24.80
  -4   6   5   11.90   16.10
  -4   6   5   77.99   44.90
   3  -6  -5 1275.87   89.39
   3  -6  -5 1350.66   97.39
   3  -6  -5 1515.85   95.29
   3  -6  -5 1536.15   98.39
  -3   6   5 1400.06   97.19
  -3   6   5 1189.78  109.29
  -3   6   5 1497.05   93.29
   2  -6  -5   84.89   24.90
   2  -6  -5   84.69   22.10
   2  -6  -5  133.09   25.80
  -2   6   5  139.69   23.80
  -2   6   5   98.99   16.70
  -2   6   5   90.39   27.80
  -2   6   5   69.19   35.60
   1  -6  -5  985.00   59.19
   1  -6  -5  845.82   67.29
   1  -6  -5  872.01   65.39
   1  -6  -5  843.52   69.59
  -1   6   5  891.31   69.69
  -1   6   5  795.52   77.69
  -1   6   5  886.31   67.19
   0  -6  -5   87.99   25.70
   0  -6  -5  124.59   29.30
   0  -6  -5  111.19   16.60
   0   6   5  182.88   37.20
   0   6   5  116.29   27.00
   0   6   5   88.29   26.70
   0   6   5  107.09   27.50
  -1  -6  -5   28.20   12.70
  -1  -6  -5    3.30   19.10
  -1  -6  -5   46.40   24.80
   1   6   5   33.30   29.60
   1   6   5   82.19   25.50
   1   6   5   58.49   22.00
   1   6   5   31.00   22.80
  -2  -6  -5   54.69   24.00
  -2  -6  -5   43.70   15.30
  -2  -6  -5   48.00   28.80
   2   6   5   46.20   19.20
   2   6   5   16.10   24.40
   2   6   5   37.90   27.20
  -3  -6  -5  239.58   39.20
  -3  -6  -5  140.79   34.60
   3   6   5  239.88   41.70
  -4  -6  -5  105.49   35.50
  -4  -6  -5   50.59   31.20
   4   6   5  108.79   36.60
  -5  -6  -5  735.73   77.59
  -5  -6  -5  759.02   75.99
   5   6   5  826.52   78.19
  -6  -6  -5  -69.29   29.80
  -6  -6  -5   40.30   35.70
   6   6   5  -37.90   30.50
  -7  -6  -5  437.06   64.29
   7   6   5  389.36   62.89
   8  -7  -5   64.99   28.10
   8  -7  -5   -9.50   26.40
  -8   7   5   92.09   39.00
  -8   7   5   75.89   54.59
   7  -7  -5    6.10   22.70
   7  -7  -5   16.80   25.10
  -7   7   5  -19.80   51.89
  -7   7   5   53.99   31.90
   6  -7  -5  196.08   32.50
   6  -7  -5  233.48   35.10
   6  -7  -5  158.28   35.90
  -6   7   5  142.79   59.69
  -6   7   5  194.68   38.40
   5  -7  -5  176.48   30.70
   5  -7  -5  140.19   24.20
   5  -7  -5  135.09   33.30
  -5   7   5  166.68   53.49
   4  -7  -5  998.70   71.79
   4  -7  -5  893.81   74.69
   4  -7  -5 1019.40   76.79
  -4   7   5  861.31   70.89
  -4   7   5  987.60   73.39
  -4   7   5  855.31   92.89
   3  -7  -5  109.19   27.50
   3  -7  -5   56.29   21.30
   3  -7  -5   76.59   25.40
  -3   7   5   50.19   24.90
  -3   7   5  106.29   19.50
  -3   7   5   99.99   43.80
   2  -7  -5  394.46   41.00
   2  -7  -5  509.55   51.39
   2  -7  -5  398.56   47.90
  -2   7   5  411.76   49.30
  -2   7   5  379.26   60.89
  -2   7   5  401.46   53.39
   1  -7  -5  438.56   50.79
   1  -7  -5  500.85   45.60
   1  -7  -5  566.04   56.39
  -1   7   5  497.65   50.59
  -1   7   5  446.16   45.90
  -1   7   5  513.95   65.49
   0  -7  -5   58.19   14.60
   0  -7  -5   79.69   26.90
   0  -7  -5   35.60   24.40
   0  -7  -5  119.39   25.30
   0   7   5  104.69   25.70
   0   7   5  110.79   31.30
   0   7   5   94.19   36.50
   0   7   5   84.29   31.50
  -1  -7  -5 1722.03  126.29
  -1  -7  -5 1707.53  125.59
  -1  -7  -5 1798.02  117.49
   1   7   5 1681.03  132.49
   1   7   5 1877.41  127.39
   1   7   5 2095.09  126.69
  -2  -7  -5  -14.10   22.50
  -2  -7  -5   -3.00   28.30
   2   7   5   -8.80   26.00
   2   7   5    3.10   26.90
  -3  -7  -5 1346.97  100.19
  -3  -7  -5 1264.97  100.19
   3   7   5 1267.97  103.99
  -4  -7  -5   54.39   35.20
  -4  -7  -5   47.00   31.90
   4   7   5   66.89   35.90
  -5  -7  -5  106.09   36.80
  -5  -7  -5  118.39   41.20
   5   7   5  101.99   43.90
  -6  -7  -5   26.30   35.20
  -6  -7  -5   34.00   33.60
   6   7   5  -19.30   36.60
   7  -8  -5  -10.20   26.30
  -7   8   5   72.69   35.40
  -7   8   5  -12.20   53.09
   6  -8  -5  769.82   66.49
  -6   8   5  790.32   72.09
  -6   8   5  670.53   95.09
   5  -8  -5   63.19   30.70
   5  -8  -5   99.39   27.60
  -5   8   5  127.79   29.20
  -5   8   5   71.09   52.99
   4  -8  -5  472.15   54.49
   4  -8  -5  512.25   50.59
   4  -8  -5  562.24   59.29
  -4   8   5  350.86   68.99
   3  -8  -5  157.88   34.30
   3  -8  -5  208.18   30.10
   3  -8  -5  187.18   38.40
  -3   8   5  231.88   37.40
  -3   8   5  132.69   51.89
   2  -8  -5   40.30   19.40
   2  -8  -5   98.19   28.70
   2  -8  -5    5.40   24.20
  -2   8   5    1.50   43.50
  -2   8   5    7.90   26.30
   1  -8  -5  182.78   38.20
   1  -8  -5  169.28   28.40
   1  -8  -5  198.68   37.80
  -1   8   5  205.28   31.20
  -1   8   5  218.18   45.60
  -1   8   5  124.29   45.80
  -1   8   5  192.78   38.60
   0  -8  -5  945.21   70.39
   0  -8  -5  894.51   78.59
   0  -8  -5  868.31   79.29
   0   8   5  828.72   80.39
   0   8   5  926.41   92.99
   0   8   5  983.50   76.09
  -1  -8  -5   49.10   23.90
  -1  -8  -5  107.19   34.80
  -1  -8  -5   86.39   33.90
   1   8   5  101.09   29.80
   1   8   5  147.49   35.30
   1   8   5   93.59   40.30
  -2  -8  -5  365.76   51.89
  -2  -8  -5  462.35   56.69
   2   8   5  232.58   50.99
   2   8   5  479.65   56.49
  -3  -8  -5   73.59   34.60
  -3  -8  -5   68.59   33.40
   3   8   5   86.59   37.00
  -4  -8  -5   33.80   33.30
  -4  -8  -5   41.50   37.80
   4   8   5   -1.20   36.90
  -5  -8  -5  124.09   44.60
  -5  -8  -5  273.17   51.89
   5   8   5  295.57   52.69
   7  -9  -5  104.69   34.10
  -7   9   5  312.07   72.99
  -7   9   5   92.19   53.09
   6  -9  -5    4.90   23.50
   6  -9  -5   42.90   33.50
  -6   9   5   37.70   54.09
   5  -9  -5   30.70   24.40
   5  -9  -5   23.50   31.50
  -5   9   5   30.90   50.49
   4  -9  -5  484.85   49.00
   4  -9  -5  435.86   54.79
   4  -9  -5  379.06   52.09
  -4   9   5  303.37   69.19
   3  -9  -5  -13.00   18.60
   3  -9  -5    5.20   25.30
   3  -9  -5   40.80   31.20
  -3   9   5  -60.99   42.40
   2  -9  -5  761.02   77.49
   2  -9  -5  817.92   62.89
   2  -9  -5  806.72   72.09
  -2   9   5  665.63   91.09
   1  -9  -5  -26.20   28.70
   1  -9  -5   47.60   21.60
   1  -9  -5   -0.40   26.80
  -1   9   5   17.00   35.60
  -1   9   5  -37.70   37.30
   0  -9  -5  275.17   50.09
   0  -9  -5  332.57   48.10
   0   9   5  337.67   52.49
   0   9   5  303.17   42.10
   0   9   5  269.57   59.09
  -1  -9  -5  -16.50   28.40
  -1  -9  -5  -22.70   26.60
   1   9   5   26.00   36.70
   1   9   5    5.20   27.00
   1   9   5  -28.40   24.90
  -2  -9  -5  -64.69   29.60
  -2  -9  -5   13.20   31.00
   2   9   5   46.30   31.20
   2   9   5   33.10   38.20
  -3  -9  -5   -8.00   32.40
  -3  -9  -5   -0.50   35.30
   3   9   5  -17.10   32.70
  -4  -9  -5  233.48   49.50
  -4  -9  -5  281.37   48.90
   4   9   5  338.87   57.49
   6 -10  -5  184.98   46.00
   6 -10  -5  190.38   36.60
  -6  10   5   88.69   60.39
   5 -10  -5   72.79   26.50
   5 -10  -5  -13.80   33.70
  -5  10   5   51.29   56.39
   4 -10  -5   58.79   35.60
   4 -10  -5   89.99   37.70
  -4  10   5  161.58   62.99
   3 -10  -5  402.76   53.29
   3 -10  -5  323.47   54.09
  -3  10   5  363.86   73.59
   2 -10  -5  100.29   36.80
   2 -10  -5   54.89   38.90
  -2  10   5   63.79   41.60
  -2  10   5   21.80   48.10
   1 -10  -5  239.78   51.99
   1 -10  -5  382.26   53.19
  -1  10   5  418.76   63.79
  -1  10   5  327.47   73.79
   0 -10  -5  363.36   51.39
   0 -10  -5  365.76   56.69
   0  10   5  434.36   60.89
   0  10   5  347.57   69.49
  -1 -10  -5   -1.90   29.80
  -1 -10  -5  -11.40   35.00
   1  10   5  -85.99   38.10
   1  10   5   22.00   31.40
  -2 -10  -5  326.17   57.39
  -2 -10  -5  313.87   49.90
   2  10   5  416.36   58.39
  -3 -10  -5  -24.80   37.50
   3  10   5  -13.40   33.60
   4 -11  -5   29.30   35.10
  -4  11   5   30.10   47.90
   3 -11  -5  120.19   45.20
   3 -11  -5  102.79   37.60
  -3  11   5  106.89   64.69
  -3  11   5   72.09   46.20
   2 -11  -5  204.98   49.80
   2 -11  -5  220.08   46.50
  -2  11   5  204.68   61.99
  -2  11   5  130.69   51.29
   1 -11  -5   86.39   32.70
   1 -11  -5   95.39   44.60
  -1  11   5   29.10   51.09
  -1  11   5   27.00   38.50
   0 -11  -5  343.67   49.10
   0 -11  -5  257.47   50.99
   0  11   5  147.69   43.90
   0  11   5  339.87   71.19
  -1 -11  -5  229.18   52.99
  -1 -11  -5  107.49   37.00
   1  11   5  124.59   58.39
  -2 -11  -5  -24.00   43.10
   2  11   5  -31.50   38.20
   1 -12  -5  194.48   63.09
  -1  12   5  324.47   67.69
  -2 -13   6  202.18   51.09
   1  13  -6   65.79   44.70
  -1 -13   6   69.19   41.50
   0  13  -6  102.89   43.00
   0 -13   6   29.70   47.40
  -1  13  -6  225.58   48.30
   1 -13   6  222.08   38.80
   1 -13   6  251.97   55.89
  -2  13  -6  109.89   38.20
   2 -13   6   41.00   32.10
   2 -13   6   19.60   66.69
  -4 -12   6   40.70   54.79
   3  12  -6  852.11   96.79
  -3 -12   6  869.11   86.19
   2  12  -6   10.50   32.00
  -2 -12   6  -37.90   30.00
   1  12  -6  233.58   49.70
  -1 -12   6  180.98   48.30
   0  12  -6   95.59   38.50
   0 -12   6   40.10   36.10
   0 -12   6   88.19   27.90
   0 -12   6   43.00   42.60
  -1  12  -6   13.60   30.90
   1 -12   6   22.10   24.80
   1 -12   6   -2.70   35.70
  -2  12  -6  113.29   35.20
   2 -12   6   69.79   38.80
   2 -12   6   72.19   30.40
  -3  12  -6  179.88   48.30
  -3  12  -6  179.18   38.40
   3 -12   6  176.88   52.29
  -4  12  -6   31.80   43.00
   4 -12   6   49.80   45.90
   5  11  -6  194.18   59.89
  -5 -11   6  245.78   53.79
   4  11  -6   44.40   39.90
  -4 -11   6   34.10   33.10
   3  11  -6  -33.10   32.10
  -3 -11   6    1.60   30.60
   2  11  -6  143.19   44.10
  -2 -11   6  155.88   40.80
   1  11  -6  405.46   59.09
  -1 -11   6  568.14   66.49
   0  11  -6   23.70   28.30
   0 -11   6    5.40   22.40
   0 -11   6   55.09   33.20
  -1  11  -6 1275.77  100.69
  -1  11  -6 1441.86  105.79
   1 -11   6 1322.17   93.59
   1 -11   6 1116.19  100.19
   1 -11   6 1106.69  106.39
  -2  11  -6   37.70   28.50
  -2  11  -6   48.90   36.20
   2 -11   6   22.10   22.90
   2 -11   6   37.60   36.30
  -3  11  -6  361.86   60.99
  -3  11  -6  471.75   61.19
   3 -11   6  430.36   61.29
  -4  11  -6   79.09   45.90
   4 -11   6   49.40   42.80
  -5  11  -6  -66.39   39.40
   5 -11   6   -9.30   46.60
   6  10  -6  388.46   70.99
  -6 -10   6  655.63   82.19
   5  10  -6  140.69   49.50
  -5 -10   6  232.88   51.19
   4  10  -6   57.69   40.20
  -4 -10   6   18.70   29.10
   3  10  -6  296.47   51.49
  -3 -10   6  253.47   46.40
   2  10  -6   87.99   35.30
  -2 -10   6  132.19   36.60
   1  10  -6  196.58   37.60
   1  10  -6  233.98   43.50
  -1 -10   6  310.87   35.00
  -1 -10   6  285.17   47.70
   0  10  -6   92.99   32.30
   0  10  -6   85.19   31.00
   0 -10   6   39.50   27.70
   0 -10   6   76.89   24.10
  -1  10  -6   48.10   33.00
  -1  10  -6   13.90   25.80
   1 -10   6   40.60   21.10
   1 -10   6   36.60   30.90
   1 -10   6   70.89   31.60
  -2  10  -6  -19.40   25.20
  -2  10  -6   38.10   35.10
   2 -10   6  -38.80   27.70
   2 -10   6   11.10   20.60
  -3  10  -6  191.78   49.00
  -3  10  -6  213.28   39.60
   3 -10   6  264.47   47.60
  -4  10  -6    7.50   37.40
   4 -10   6  -16.60   34.40
  -5  10  -6  896.81   94.59
   5 -10   6  843.12   92.29
  -6  10  -6  -23.40   44.80
   6 -10   6   58.49   51.19
   7   9  -6   65.49   57.29
  -7  -9   6   31.60   43.10
   6   9  -6   13.60   46.60
  -6  -9   6   82.39   36.10
   5   9  -6   46.40   42.70
  -5  -9   6   27.20   30.20
   4   9  -6  510.85   68.79
  -4  -9   6  571.94   69.89
   3   9  -6   -2.70   25.90
  -3  -9   6   13.70   27.60
   2   9  -6  421.36   55.59
   2   9  -6  488.45   51.69
  -2  -9   6  422.66   55.09
   1   9  -6  325.87   48.70
   1   9  -6  379.36   46.70
  -1  -9   6  334.37   48.50
  -1  -9   6  351.26   37.30
   0   9  -6   85.39   32.50
   0   9  -6   84.29   28.40
   0  -9   6   51.09   19.90
   0  -9   6   45.70   27.10
  -1   9  -6  800.42   64.89
  -1   9  -6  604.34   69.39
   1  -9   6  809.12   60.09
   1  -9   6  745.13   66.69
   1  -9   6  639.64   65.29
  -2   9  -6  139.89   38.40
  -2   9  -6  137.79   32.80
   2  -9   6  102.79   26.10
   2  -9   6   93.99   33.40
   2  -9   6   59.09   31.80
  -3   9  -6  405.76   47.00
  -3   9  -6  276.47   48.10
   3  -9   6  235.18   45.70
  -4   9  -6  251.97   51.99
   4  -9   6  275.87   48.10
  -5   9  -6  -22.00   36.70
   5  -9   6  -44.60   37.20
  -6   9  -6  119.69   47.80
   6  -9   6   64.49   46.30
   7   8  -6   80.79   50.59
  -7  -8   6   -6.30   33.90
   6   8  -6  213.18   58.39
  -6  -8   6  215.48   46.30
   5   8  -6   24.30   38.20
  -5  -8   6   74.99   33.20
   4   8  -6   22.60   32.50
  -4  -8   6  -24.20   24.70
   3   8  -6  191.38   39.20
  -3  -8   6  213.88   39.40
   2   8  -6  245.38   38.50
   2   8  -6  209.68   35.90
  -2  -8   6  315.87   43.90
   1   8  -6    7.90   22.20
   1   8  -6   61.59   27.80
   1   8  -6   30.30   14.30
  -1  -8   6   37.00   15.20
  -1  -8   6   60.09   27.20
  -1  -8   6   34.50   16.90
   0   8  -6 1160.98   96.89
   0   8  -6 1498.75  104.09
   0   8  -6 1586.84  108.09
   0  -8   6 1584.64  107.39
   0  -8   6 1683.33   98.99
   0  -8   6 1446.66   98.49
  -1   8  -6   73.69   29.20
  -1   8  -6   31.70   20.30
  -1   8  -6   67.39   22.40
   1  -8   6   52.49   17.40
   1  -8   6   21.00   24.10
   1  -8   6   49.60   26.60
   1  -8   6   44.50   17.90
  -2   8  -6 1179.08   86.69
  -2   8  -6 1141.69   92.79
   2  -8   6 1285.57   85.69
   2  -8   6 1235.48   91.09
   2  -8   6 1066.09   90.59
  -3   8  -6  507.15   57.79
  -3   8  -6  402.76   46.70
   3  -8   6  381.76   50.69
   3  -8   6  370.36   49.00
  -4   8  -6  317.07   48.30
   4  -8   6  233.68   44.80
  -5   8  -6  603.94   70.59
   5  -8   6  497.65   65.79
  -6   8  -6   -2.80   35.30
   6  -8   6   52.59   43.10
  -7   8  -6   97.79   45.70
   7  -8   6  157.78   52.99
   8   7  -6   44.20   51.59
  -8  -7   6  -12.10   34.80
  -8  -7   6   50.69   33.90
   7   7  -6  446.96   76.79
  -7  -7   6  657.73   76.99
   6   7  -6   71.59   41.60
  -6  -7   6   -9.10   29.90
   5   7  -6  209.08   48.20
  -5  -7   6  236.88   43.70
   4   7  -6  952.90   83.39
  -4  -7   6  965.40   78.29
   3   7  -6   15.70   10.60
   3   7  -6   32.80   24.70
  -3  -7   6  -20.20   11.50
  -3  -7   6    0.20   21.80
   2   7  -6 1778.52  119.99
   2   7  -6 1926.21  110.89
   2   7  -6 1407.06  116.69
  -2  -7   6 1777.12  112.69
  -2  -7   6 1781.22  120.79
   1   7  -6  -14.90   20.20
   1   7  -6   -3.10   12.10
   1   7  -6   22.20   19.40
  -1  -7   6   -9.60   12.80
  -1  -7   6   -3.30   18.00
  -1  -7   6    7.70   11.30
   0   7  -6  423.16   50.09
   0   7  -6  426.76   43.70
   0  -7   6  511.25   40.00
   0  -7   6  501.35   48.90
   0  -7   6  548.35   40.80
   0  -7   6  435.86   40.50
  -1   7  -6  268.07   36.50
  -1   7  -6  394.76   40.80
  -1   7  -6  279.87   42.10
   1  -7   6  330.97   34.50
   1  -7   6  272.07   31.60
   1  -7   6  371.46   30.30
   1  -7   6  332.67   44.20
   1  -7   6  356.46   39.90
  -2   7  -6   66.49   26.70
  -2   7  -6   17.20   18.90
  -2   7  -6   38.60   19.50
   2  -7   6   44.90   26.00
   2  -7   6   52.29   18.70
   2  -7   6   19.20   24.30
  -3   7  -6   41.50   26.00
  -3   7  -6   53.79   20.30
   3  -7   6   55.69   28.50
   3  -7   6   56.79   27.20
  -4   7  -6  778.62   71.19
   4  -7   6  673.43   67.99
  -5   7  -6   96.09   38.80
   5  -7   6   99.69   38.60
  -6   7  -6  566.94   69.39
   6  -7   6  555.04   71.49
  -7   7  -6    7.90   37.60
   7  -7   6  -66.79   36.60
   8   6  -6   24.60   49.30
  -8  -6   6   41.10   34.00
  -8  -6   6   -7.90   34.30
   7   6  -6   18.70   44.90
  -7  -6   6   49.10   34.30
  -7  -6   6   53.49   33.40
   6   6  -6   40.40   23.80
   6   6  -6   10.00   40.20
  -6  -6   6   66.09   32.80
   5   6  -6  633.64   76.39
   5   6  -6  704.13   52.59
  -5  -6   6  691.13   53.29
  -5  -6   6  728.73   66.19
   4   6  -6  -22.80   21.50
   4   6  -6   17.70   12.30
  -4  -6   6   17.70   13.20
  -4  -6   6   35.00   24.90
   3   6  -6 2038.00  139.99
   3   6  -6 2174.98  131.09
  -3  -6   6 2222.68  131.99
  -3  -6   6 1933.81  138.29
   2   6  -6    6.90   10.70
   2   6  -6   -8.00   15.50
   2   6  -6  -17.10   16.80
  -2  -6   6   -0.70   16.90
  -2  -6   6   -0.60   11.30
   1   6  -6  750.92   60.79
   1   6  -6  582.64   51.59
   1   6  -6  711.23   55.99
  -1  -6   6  754.02   48.50
  -1  -6   6  726.83   52.19
  -1  -6   6  678.43   57.59
   0   6  -6  185.28   33.20
   0   6  -6  314.17   34.00
   0   6  -6  195.78   31.70
   0  -6   6  283.97   28.10
   0  -6   6  291.47   36.80
   0  -6   6  263.57   28.30
   0  -6   6  303.17   26.20
  -1   6  -6   57.49   17.20
  -1   6  -6   10.10   20.10
  -1   6  -6   41.20   17.70
   1  -6   6   42.30   15.80
   1  -6   6   33.30   15.00
   1  -6   6   39.80   18.50
   1  -6   6   20.50   20.50
   1  -6   6   50.19   13.50
  -2   6  -6  721.23   66.19
  -2   6  -6  874.01   61.09
  -2   6  -6  904.41   63.89
   2  -6   6  827.72   62.09
   2  -6   6  857.21   64.79
   2  -6   6  724.63   67.59
  -3   6  -6  131.59   25.70
  -3   6  -6  137.39   31.30
  -3   6  -6  154.58   24.50
   3  -6   6  165.48   34.70
   3  -6   6   73.69   26.40
  -4   6  -6  253.27   41.50
   4  -6   6  295.87   45.60
   4  -6   6  275.17   41.60
  -5   6  -6  110.19   34.50
   5  -6   6   94.89   34.30
  -6   6  -6    3.00   32.20
   6  -6   6  -25.00   32.30
  -7   6  -6   96.39   41.90
   7  -6   6  161.88   48.70
  -8   6  -6  201.38   53.69
   8  -6   6  251.67   60.29
   9   5  -6  131.39   64.39
  -9  -5   6  388.26   55.29
   8   5  -6  -60.49   47.00
  -8  -5   6    3.10   32.70
  -8  -5   6   58.59   33.50
   7   5  -6  483.15   77.09
   7   5  -6  619.34   53.99
  -7  -5   6  725.63   75.69
  -7  -5   6  677.33   69.89
   6   5  -6    9.10   15.10
   6   5  -6   40.30   38.30
  -6  -5   6    4.80   26.00
   5   5  -6  764.52   58.29
   5   5  -6  750.22   74.19
  -5  -5   6  864.71   57.39
  -5  -5   6  754.82   67.29
   4   5  -6   43.30   14.20
   4   5  -6   35.00   26.50
  -4  -5   6   19.80   22.60
  -4  -5   6   28.40   12.30
   3   5  -6    8.80   11.50
   3   5  -6   22.70   20.70
  -3  -5   6    2.20   11.30
  -3  -5   6    2.50   18.80
   2   5  -6    5.80   16.00
   2   5  -6   -7.30   15.20
   2   5  -6    8.90   11.60
  -2  -5   6   19.60   17.50
  -2  -5   6    9.40   11.40
   1   5  -6 2103.59  140.79
   1   5  -6 2167.48  137.49
  -1  -5   6 2174.88  133.99
  -1  -5   6 2181.68  130.79
  -1  -5   6 2217.98  141.09
  -1  -5   6 2109.39  135.39
   0   5  -6   12.90   15.70
   0   5  -6    3.60   12.70
   0   5  -6   22.70    6.60
   0   5  -6   14.40   19.20
   0  -5   6   17.00   15.30
   0  -5   6   10.70   13.10
   0  -5   6   21.90   18.10
   0  -5   6   27.20   13.50
   0  -5   6    8.40    9.80
  -1   5  -6 2957.00  201.78
  -1   5  -6 3164.68  200.58
  -1   5  -6 3363.86  197.88
   1  -5   6 3411.86  199.78
   1  -5   6 3111.69  203.68
   1  -5   6 3283.97  198.38
   1  -5   6 3348.96  196.08
  -2   5  -6  126.29   27.10
  -2   5  -6  130.79   19.90
  -2   5  -6  112.19   22.90
   2  -5   6   79.49   22.30
   2  -5   6   88.29   27.30
  -3   5  -6  686.43   54.29
  -3   5  -6  625.24   56.69
   3  -5   6  598.64   51.29
   3  -5   6  732.13   61.59
   3  -5   6  674.53   57.79
  -4   5  -6  372.56   41.10
  -4   5  -6  401.96   48.40
   4  -5   6  266.07   41.70
   4  -5   6  305.17   44.10
  -5   5  -6   12.30   27.20
   5  -5   6    2.10   27.70
   5  -5   6   47.50   29.90
  -6   5  -6  696.93   73.79
   6  -5   6  782.62   82.69
  -7   5  -6    6.50   33.70
   7  -5   6  -37.30   34.70
  -8   5  -6  282.87   55.99
   8  -5   6  294.47   60.69
   9   4  -6  106.39   29.60
   9   4  -6  -42.90   48.00
  -9  -4   6  135.49   37.80
   8   4  -6  422.86   46.80
   8   4  -6  309.07   70.59
  -8  -4   6  604.04   62.79
   7   4  -6   24.90   42.80
   7   4  -6    8.40   19.70
  -7  -4   6   64.59   31.30
  -7  -4   6   20.60   27.00
   6   4  -6  843.62   83.59
   6   4  -6  693.93   58.39
  -6  -4   6  767.02   66.59
  -6  -4   6  754.02   65.79
   5   4  -6 1668.43  105.89
   5   4  -6 1603.34  121.49
  -5  -4   6 1597.14  110.99
  -5  -4   6 1620.34  111.29
  -5  -4   6 1579.44  101.79
   4   4  -6  142.09   21.10
   4   4  -6  103.39   29.00
   4   4  -6  182.68   16.60
  -4  -4   6   94.99   15.70
  -4  -4   6  162.58   29.70
  -4  -4   6   59.49   23.10
   3   4  -6 2301.37  133.19
   3   4  -6 2179.18  145.29
   3   4  -6 2325.07  138.89
  -3  -4   6 2094.49  142.89
  -3  -4   6 2264.87  142.19
  -3  -4   6 2143.39  136.09
   2   4  -6   17.20   12.70
   2   4  -6    3.40   17.40
   2   4  -6   22.10    5.80
   2   4  -6   18.30   14.80
  -2  -4   6    8.60   16.00
  -2  -4   6    6.30   13.90
  -2  -4   6   14.20   10.50
   1   4  -6  874.11   63.89
   1   4  -6  829.42   58.89
   1   4  -6  690.93   58.39
   1   4  -6  843.02   52.29
  -1  -4   6  856.71   59.19
  -1  -4   6  851.21   56.79
  -1  -4   6  852.61   62.89
   0   4  -6   29.70   12.50
   0   4  -6   52.89    9.70
   0   4  -6   31.50   18.30
   0  -4   6   36.20   12.10
   0  -4   6   50.19   14.30
   0  -4   6   48.90   14.40
   0  -4   6   64.79   21.90
  -1   4  -6  184.58   24.80
  -1   4  -6  138.29   26.00
  -1   4  -6  210.98   22.00
   1  -4   6  134.89   28.50
   1  -4   6  171.68   23.10
   1  -4   6  217.88   25.80
   1  -4   6  163.68   21.30
  -2   4  -6  257.67   29.60
  -2   4  -6  278.07   34.30
  -2   4  -6  288.97   23.20
   2  -4   6  246.28   25.40
   2  -4   6  218.08   29.90
   2  -4   6  187.38   34.40
  -3   4  -6  697.23   57.29
  -3   4  -6  671.93   53.79
   3  -4   6  695.73   60.19
   3  -4   6  602.34   55.79
   3  -4   6  607.74   51.19
  -4   4  -6  354.96   42.70
  -4   4  -6  351.46   37.10
   4  -4   6  318.17   44.00
   4  -4   6  257.77   41.70
  -5   4  -6 1408.46  102.49
  -5   4  -6 1311.37   99.99
   5  -4   6 1418.26  108.29
  -6   4  -6   47.70   30.90
   6  -4   6   -3.20   33.80
  -7   4  -6  353.96   53.19
   7  -4   6  283.07   53.49
  -8   4  -6  150.88   43.70
   8  -4   6  122.69   44.70
   9   3  -6   39.40   23.70
   9   3  -6  -22.50   48.00
  -9  -3   6  213.28   58.59
   8   3  -6   54.69   48.80
   8   3  -6   30.30   22.80
  -8  -3   6   63.39   31.30
   7   3  -6   90.59   24.00
   7   3  -6  128.19   23.50
   7   3  -6   75.49   44.60
  -7  -3   6   92.39   32.10
  -7  -3   6   85.29   29.50
   6   3  -6   75.29   36.20
   6   3  -6   90.39   21.30
   6   3  -6   34.60   14.10
  -6  -3   6   42.30   24.20
  -6  -3   6   40.90   25.10
   5   3  -6  381.36   31.50
   5   3  -6  391.46   36.40
   5   3  -6  457.75   56.99
  -5  -3   6  361.86   30.20
  -5  -3   6  373.36   40.90
  -5  -3   6  325.87   41.10
   4   3  -6  943.51   56.99
   4   3  -6  695.03   68.19
   4   3  -6  876.71   61.59
  -4  -3   6  828.32   64.29
  -4  -3   6  820.02   56.49
  -4  -3   6  944.01   66.59
   3   3  -6  169.48   17.10
   3   3  -6  180.98   22.80
   3   3  -6  232.28   32.60
  -3  -3   6  175.38   26.50
  -3  -3   6  159.78   17.70
  -3  -3   6  167.58   27.70
   2   3  -6 1002.20   83.89
   2   3  -6 1250.27   84.29
   2   3  -6 1247.98   82.49
   2   3  -6 1319.87   76.59
  -2  -3   6 1252.07   85.49
  -2  -3   6 1169.08   81.89
  -2  -3   6 1349.16   78.69
   1   3  -6 1749.03  123.19
   1   3  -6 1689.83  116.39
   1   3  -6 2035.80  127.19
   1   3  -6 2034.50  122.69
  -1  -3   6 2047.20  120.29
  -1  -3   6 2009.20  122.79
  -1  -3   6 2078.79  119.29
  -1  -3   6 2059.99  127.09
   0   3  -6   64.19   11.70
   0   3  -6   60.19   18.30
   0   3  -6   65.39   12.90
   0  -3   6   53.99   20.20
   0  -3   6   81.79   14.60
   0  -3   6   72.59   16.30
   0  -3   6   72.49   14.50
  -1   3  -6 3145.89  208.38
  -1   3  -6 3651.83  204.38
  -1   3  -6 3603.14  202.58
  -1   3  -6 3396.26  207.18
   1  -3   6 3465.35  206.28
   1  -3   6 2979.50  210.68
   1  -3   6 3407.66  205.48
  -2   3  -6   43.70   18.20
  -2   3  -6   46.00   15.50
   2  -3   6   50.39   25.50
   2  -3   6   59.09   16.00
   2  -3   6   64.79   20.40
  -3   3  -6  642.04   49.50
  -3   3  -6  669.23   53.29
   3  -3   6  572.14   50.59
   3  -3   6  678.23   59.79
   3  -3   6  590.34   55.69
  -4   3  -6  282.47   36.60
  -4   3  -6  179.28   27.50
   4  -3   6  219.38   36.60
   4  -3   6  267.07   30.50
   4  -3   6  212.08   36.90
  -5   3  -6   26.70   24.90
  -5   3  -6   -2.50   17.10
   5  -3   6   49.40   28.60
  -6   3  -6   73.09   30.50
   6  -3   6   11.70   35.40
  -7   3  -6  240.48   46.20
   7  -3   6  258.17   50.89
  -8   3  -6   89.39   41.60
   8  -3   6  -23.90   41.50
   9   2  -6   23.10   25.20
   9   2  -6   -3.60   29.50
  -9  -2   6  140.29   55.59
   8   2  -6  586.54   55.29
   8   2  -6  564.54   82.59
   8   2  -6  568.74   51.79
  -8  -2   6  783.52   95.29
  -8  -2   6  514.25   61.79
   7   2  -6   15.90   19.00
   7   2  -6   15.70   36.30
   7   2  -6   -6.20   15.20
  -7  -2   6   24.40   27.00
   6   2  -6 1235.78   89.29
   6   2  -6 1164.58  102.29
   6   2  -6 1363.36   85.99
  -6  -2   6 1248.58   91.99
  -6  -2   6 1338.47   92.09
   5   2  -6    7.20   26.70
   5   2  -6   18.70   11.40
   5   2  -6    8.70   13.80
  -5  -2   6   -4.00   17.30
  -5  -2   6   -3.50   19.60
   4   2  -6  314.47   25.20
   4   2  -6  311.07   43.00
   4   2  -6  338.87   27.90
   4   2  -6  292.07   32.80
  -4  -2   6  330.97   26.20
  -4  -2   6  364.16   36.10
  -4  -2   6  403.26   40.20
   3   2  -6   25.20    7.30
   3   2  -6    4.30   16.60
   3   2  -6   16.70    8.70
   3   2  -6   26.70   13.20
  -3  -2   6   28.00    9.00
  -3  -2   6    5.80   16.40
  -3  -2   6   17.90   15.50
   2   2  -6  236.88   21.20
   2   2  -6  264.67   19.00
   2   2  -6  177.38   28.40
   2   2  -6  238.58   20.70
   2   2  -6  243.58   29.30
   2   2  -6  224.28   26.60
  -2  -2   6  251.87   30.30
  -2  -2   6  266.67   28.90
  -2  -2   6  256.97   22.30
  -2  -2   6  243.28   18.40
   1   2  -6  107.19   14.60
   1   2  -6  171.28   25.70
   1   2  -6  104.29   14.50
   1   2  -6  166.88   23.30
   1   2  -6  177.18   21.10
  -1  -2   6  114.29   15.30
  -1  -2   6  163.48   26.00
  -1  -2   6  134.09   20.80
  -1  -2   6  162.08   15.00
   0   2  -6 2449.55  133.29
   0   2  -6 2208.98  137.89
   0   2  -6 2295.07  132.19
   0  -2   6 1947.21  138.89
   0  -2   6 1878.21  134.69
   0  -2   6 2184.78  132.49
  -1   2  -6  117.49   11.80
  -1   2  -6  113.69   17.30
  -1   2  -6   90.09   20.40
  -1   2  -6   93.19   18.20
   1  -2   6   96.79   17.60
   1  -2   6  117.49   14.60
   1  -2   6   96.49   19.20
   1  -2   6   92.29   25.50
  -2   2  -6 2975.30  183.18
  -2   2  -6 3115.49  181.58
  -2   2  -6 3148.19  181.08
   2  -2   6 2727.73  184.08
   2  -2   6 2701.93  178.98
   2  -2   6 3124.49  189.18
   2  -2   6 2897.41  182.98
  -3   2  -6  721.93   55.69
  -3   2  -6  686.13   51.79
   3  -2   6  719.53   47.80
   3  -2   6  614.14   60.89
   3  -2   6  632.24   54.39
   3  -2   6  669.13   58.49
  -4   2  -6  678.13   53.09
  -4   2  -6  647.44   56.59
   4  -2   6  724.23   54.99
   4  -2   6  590.54   60.89
   4  -2   6  670.43   61.69
  -5   2  -6 1484.25  102.19
  -5   2  -6 1511.65  106.99
   5  -2   6 1515.25  111.69
   5  -2   6 1589.74  103.79
  -6   2  -6   18.70   25.20
   6  -2   6   47.60   33.00
  -7   2  -6  294.27   47.50
   7  -2   6  286.27   55.19
  -8   2  -6  139.49   44.10
   8  -2   6   30.00   43.50
   9   1  -6  300.97   43.70
  -9  -1   6  478.15   80.69
   8   1  -6  164.08   30.40
   8   1  -6  140.79   32.30
  -8  -1   6  110.69   56.89
  -8  -1   6  159.18   40.00
   7   1  -6  501.65   45.90
   7   1  -6  517.85   49.00
   7   1  -6  552.14   73.99
  -7  -1   6  506.25   54.59
  -7  -1   6  427.56   70.29
   6   1  -6   52.09   16.60
   6   1  -6   31.90   30.30
   6   1  -6   12.10   16.30
  -6  -1   6   29.60   22.50
  -6  -1   6   48.60   22.60
  -6  -1   6   27.20   38.50
   5   1  -6  161.98   35.00
   5   1  -6  130.99   22.30
   5   1  -6  161.18   22.20
  -5  -1   6   93.49   24.70
  -5  -1   6  175.78   27.00
   4   1  -6 1471.65   99.89
   4   1  -6 1535.35   96.89
   4   1  -6 1597.14  108.89
  -4  -1   6 1568.84   92.79
  -4  -1   6 1516.75  101.19
  -4  -1   6 1471.35  102.19
   3   1  -6  173.98   23.80
   3   1  -6  265.57   20.40
   3   1  -6  225.28   22.90
   3   1  -6  250.97   33.10
   3   1  -6  197.88   17.30
  -3  -1   6  223.88   18.90
  -3  -1   6  223.78   28.50
  -3  -1   6  190.28   27.60
   2   1  -6 6642.34  378.66
   2   1  -6 6440.86  382.76
   2   1  -6 6318.27  381.26
   2   1  -6 6453.55  376.06
   2   1  -6 5967.00  383.06
   2   1  -6 6788.62  377.46
  -2  -1   6 6441.46  383.16
  -2  -1   6 6335.37  376.26
  -2  -1   6 6130.89  381.66
   1   1  -6  221.58   15.10
   1   1  -6  177.28   24.60
   1   1  -6  186.48   20.80
   1   1  -6  197.48   22.70
   1   1  -6  189.08   18.60
   1   1  -6  254.37   29.00
  -1  -1   6  189.68   16.30
  -1  -1   6  150.18   24.50
  -1  -1   6  162.38   27.10
  -1  -1   6  183.18   25.50
   0   1  -6 3824.92  225.38
   0   1  -6 3884.71  227.98
   0   1  -6 3763.62  230.88
   0   1  -6 3768.12  226.88
   0  -1   6 3969.50  229.18
   0  -1   6 3875.51  228.88
   0  -1   6 3658.93  225.98
   0  -1   6 3694.33  234.48
   0  -1   6 3663.53  230.38
  -1   1  -6    0.50   11.00
  -1   1  -6   -7.10   12.90
   1  -1   6   -5.30   12.00
   1  -1   6   -4.10    9.00
   1  -1   6    0.30   18.90
   1  -1   6    8.90   10.80
   1  -1   6   -7.10   15.40
  -2   1  -6   83.19   15.80
  -2   1  -6   63.19   17.40
  -2   1  -6   86.89   18.20
   2  -1   6   72.09   20.30
   2  -1   6   41.70   16.30
   2  -1   6   71.49   22.50
   2  -1   6   64.49   25.70
  -3   1  -6   -5.50   13.40
  -3   1  -6   -4.90   11.90
  -3   1  -6   23.50   16.50
   3  -1   6  -13.50   17.10
   3  -1   6  -10.70   16.30
   3  -1   6    2.90   12.30
   3  -1   6  -23.30   21.60
  -4   1  -6 1085.99   78.29
  -4   1  -6 1182.28   84.09
  -4   1  -6 1179.88   82.99
   4  -1   6 1111.89   85.79
   4  -1   6 1277.07   85.49
  -5   1  -6   25.10   21.40
   5  -1   6   34.20   26.80
   5  -1   6   25.60   18.10
  -6   1  -6  550.04   61.49
  -6   1  -6  526.55   55.69
   6  -1   6  618.44   54.49
   6  -1   6  512.05   66.99
  -7   1  -6   -3.90   31.20
   7  -1   6   15.00   36.60
  -8   1  -6   64.89   35.20
   8  -1   6   36.80   43.60
   9   0  -6  216.08   34.50
   9   0  -6  228.18   38.50
  -9   0   6  267.37   72.99
   8   0  -6   47.20   23.20
   8   0  -6   44.60   25.50
  -8   0   6  110.89   52.59
   7   0  -6  143.79   30.40
   7   0  -6  126.09   25.30
  -7   0   6   61.99   44.70
  -7   0   6   90.69   31.40
   6   0  -6  494.15   42.10
   6   0  -6  603.34   69.09
   6   0  -6  473.65   48.30
  -6   0   6  455.75   66.69
  -6   0   6  491.15   46.90
  -6   0   6  487.35   52.09
   5   0  -6  577.14   62.19
   5   0  -6  492.55   42.50
   5   0  -6  516.85   41.10
  -5   0   6  489.35   48.90
  -5   0   6  437.26   42.10
  -5   0   6  606.54   66.39
   4   0  -6  766.22   52.79
   4   0  -6  853.31   65.29
   4   0  -6  770.02   55.59
  -4   0   6  694.53   69.19
  -4   0   6  752.92   56.79
  -4   0   6  666.13   58.99
   3   0  -6 1863.91  116.59
   3   0  -6 1895.71  122.99
   3   0  -6 1830.52  118.39
   3   0  -6 2028.70  111.49
   3   0  -6 1940.41  116.19
  -3   0   6 1717.03  125.79
  -3   0   6 1697.63  120.99
  -3   0   6 1880.11  120.59
   2   0  -6   43.20   15.10
   2   0  -6   35.90   11.70
   2   0  -6   18.00    6.20
   2   0  -6   26.60    4.00
   2   0  -6   44.00   11.80
   2   0  -6   51.19   14.80
  -2   0   6   22.40   20.50
  -2   0   6   38.10   18.60
  -2   0   6   45.30   19.20
   1   0  -6  213.58   26.30
   1   0  -6  159.88   23.70
   1   0  -6  178.08   22.90
   1   0  -6  283.57   24.20
   1   0  -6  193.48   17.70
   1   0  -6  201.48   19.80
  -1   0   6  226.78   23.80
  -1   0   6  269.77   30.90
  -1   0   6  271.17   32.40
  -1   0   6  252.97   16.70
  -1   0   6  295.17   33.10
   0   0  -6 1526.05   96.99
   0   0  -6 1635.84  100.99
   0   0  -6 1553.54   99.69
   0   0   6 1563.04  102.59
   0   0   6 1627.24  106.29
   0   0   6 1554.74   96.49
   0   0   6 1472.95   98.09
   0   0   6 1566.14   99.99
  -1   0  -6   18.80   13.10
  -1   0  -6   41.40   14.40
   1   0   6    9.00   21.00
   1   0   6   12.70   12.60
   1   0   6    6.90   11.90
   1   0   6   28.40   19.40
   1   0   6    5.20   17.80
   1   0   6    3.40   10.30
  -2   0  -6 1751.92  120.29
  -2   0  -6 1899.51  116.39
  -2   0  -6 1866.51  118.69
   2   0   6 2175.58  121.49
   2   0   6 1719.83  123.39
   2   0   6 1810.62  126.49
   2   0   6 1890.21  115.79
   2   0   6 1813.42  119.39
  -3   0  -6   -9.60   14.10
  -3   0  -6    9.80   11.20
  -3   0  -6    9.30   14.70
   3   0   6   17.00   25.40
   3   0   6   25.20   18.90
   3   0   6   14.50   18.10
   3   0   6  -11.50   13.40
  -4   0  -6 1006.10   68.19
  -4   0  -6 1039.00   72.89
  -4   0  -6  939.61   75.49
   4   0   6 1009.70   76.59
   4   0   6  969.90   77.59
  -5   0  -6   14.50   20.50
  -5   0  -6   22.20   23.50
   5   0   6  -31.60   24.10
   5   0   6   32.70   20.70
  -6   0  -6   11.70   26.60
   6   0   6   38.10   24.20
   6   0   6  -23.10   32.00
  -7   0  -6   -3.20   31.10
   7   0   6   90.29   42.20
  -8   0  -6  417.76   58.49
   8   0   6  305.27   62.99
   9  -1  -6  233.78   36.20
   9  -1  -6  296.97   44.80
  -9   1   6  228.88   69.09
   8  -1  -6  -17.30   22.30
   8  -1  -6   21.50   22.80
  -8   1   6  -12.70   50.89
   7  -1  -6  813.02   68.19
   7  -1  -6  883.51   65.19
  -7   1   6  735.03   73.19
   6  -1  -6   21.90   15.40
   6  -1  -6   25.80   17.80
  -6   1   6   34.00   27.30
  -6   1   6   49.60   28.20
  -6   1   6   22.80   35.90
   5  -1  -6  465.05   40.70
   5  -1  -6  546.55   43.40
  -5   1   6  392.16   48.60
  -5   1   6  570.34   64.79
   4  -1  -6  108.59   20.70
   4  -1  -6  173.08   22.50
   4  -1  -6  131.19   20.10
  -4   1   6  167.48   31.20
  -4   1   6  155.08   36.20
  -4   1   6  160.78   26.00
   3  -1  -6   97.89   18.00
   3  -1  -6   96.19   18.40
   3  -1  -6  123.99   18.50
   3  -1  -6   92.19   10.60
  -3   1   6  106.49   23.40
  -3   1   6   97.19   30.00
  -3   1   6   68.49   23.70
   2  -1  -6  552.94   40.70
   2  -1  -6  494.95   33.80
   2  -1  -6  520.85   40.60
   2  -1  -6  468.05   33.10
   2  -1  -6  526.25   41.00
  -2   1   6  457.55   45.80
  -2   1   6  517.45   49.10
  -2   1   6  603.04   47.30
   1  -1  -6  973.40   70.19
   1  -1  -6 1290.87   70.89
   1  -1  -6  918.81   74.39
   1  -1  -6  985.70   74.09
  -1   1   6 1293.27   80.79
  -1   1   6 1233.88   80.59
  -1   1   6 1259.07   81.29
   0  -1  -6  486.05   41.20
   0  -1  -6  561.84   40.60
   0  -1  -6  570.54   41.70
   0  -1  -6  451.35   36.40
   0  -1  -6  544.75   38.20
   0   1   6  511.65   47.40
   0   1   6  514.35   47.00
   0   1   6  528.45   37.60
   0   1   6  539.25   44.10
   0   1   6  452.75   47.00
   0   1   6  497.35   37.80
  -1  -1  -6 3463.65  189.08
  -1  -1  -6 3431.76  185.88
   1   1   6 2756.22  188.28
   1   1   6 2865.01  182.28
   1   1   6 2977.90  193.48
   1   1   6 2657.23  190.48
   1   1   6 2674.13  184.08
   1   1   6 3541.05  186.38
  -2  -1  -6  222.98   25.50
  -2  -1  -6  232.88   29.60
   2   1   6  209.08   20.20
   2   1   6  215.48   29.60
   2   1   6  221.18   37.90
   2   1   6  205.78   27.90
   2   1   6  216.28   21.40
   2   1   6  244.68   34.30
  -3  -1  -6  289.37   38.20
  -3  -1  -6  347.07   34.00
  -3  -1  -6  358.16   29.40
   3   1   6  364.16   37.00
   3   1   6  394.86   43.60
   3   1   6  420.16   43.00
  -4  -1  -6 1487.65   97.49
  -4  -1  -6 1207.78  100.89
   4   1   6 1525.55  105.29
   4   1   6 1622.74  106.49
  -5  -1  -6   -6.70   22.70
   5   1   6   20.80   22.70
   5   1   6    9.50   26.20
  -6  -1  -6  848.72   81.99
   6   1   6 1099.19   84.49
   6   1   6  983.70   91.29
  -7  -1  -6   21.80   35.10
   7   1   6   -9.80   27.00
   7   1   6  -34.20   35.90
  -8  -1  -6  400.46   62.19
   8   1   6  356.76   67.09
   9  -2  -6  130.09   32.40
   9  -2  -6   91.09   32.40
  -9   2   6   41.50   56.39
   8  -2  -6  159.38   33.30
   8  -2  -6  178.28   32.00
  -8   2   6  126.89   61.89
   7  -2  -6    8.90   19.10
   7  -2  -6    7.50   21.50
  -7   2   6   -4.00   45.30
   6  -2  -6  359.96   40.10
   6  -2  -6  290.57   35.30
  -6   2   6  314.97   56.99
  -6   2   6  343.87   48.70
   5  -2  -6 1354.56   88.39
   5  -2  -6 1303.07   89.49
  -5   2   6 1217.48  102.39
  -5   2   6 1345.27   90.39
  -5   2   6 1232.88   95.39
   4  -2  -6   65.59   16.90
   4  -2  -6   23.70   13.40
   4  -2  -6   16.00    9.60
   4  -2  -6   23.10   13.70
  -4   2   6   19.90   29.70
  -4   2   6   12.50   25.60
   3  -2  -6 2861.21  181.38
   3  -2  -6 2916.41  182.08
   3  -2  -6 3112.99  182.08
   3  -2  -6 2769.92  176.78
  -3   2   6 3015.40  182.28
  -3   2   6 3113.69  187.28
  -3   2   6 2926.91  190.08
   2  -2  -6   41.10   15.90
   2  -2  -6   33.60   13.40
   2  -2  -6   20.00    6.00
   2  -2  -6   37.10   15.30
   2  -2  -6   26.00    9.30
  -2   2   6   22.90   24.00
  -2   2   6   39.00   24.30
  -2   2   6   31.50   19.40
   1  -2  -6 1035.80   68.89
   1  -2  -6 1078.19   64.29
   1  -2  -6  906.91   70.19
   1  -2  -6  967.60   66.09
  -1   2   6  946.61   73.09
  -1   2   6 1069.89   75.89
  -1   2   6 1103.19   76.09
   0  -2  -6  297.87   28.90
   0  -2  -6  267.57   31.60
   0  -2  -6  234.68   25.70
   0   2   6  225.48   33.60
   0   2   6  295.97   35.20
   0   2   6  231.88   24.30
   0   2   6  288.97   38.10
   0   2   6  255.57   22.90
   0   2   6  189.88   33.30
  -1  -2  -6  362.06   35.30
  -1  -2  -6  331.37   30.20
  -1  -2  -6  303.77   25.30
   1   2   6  224.18   36.30
   1   2   6  271.67   29.40
   1   2   6  306.97   36.40
   1   2   6  279.77   32.10
   1   2   6  251.47   23.90
   1   2   6  248.78   37.80
   1   2   6  213.28   21.50
  -2  -2  -6 1249.57   75.59
  -2  -2  -6 1121.49   81.79
   2   2   6 1155.98   83.09
   2   2   6 1250.77   88.09
   2   2   6 1287.77   83.09
   2   2   6  991.00   76.19
  -3  -2  -6   33.90   20.20
   3   2   6   70.39   25.70
   3   2   6   30.30   23.50
   3   2   6   63.69   22.30
  -4  -2  -6  579.94   61.29
   4   2   6  794.72   66.69
   4   2   6  742.33   66.79
  -5  -2  -6  724.33   74.29
   5   2   6  982.00   81.29
   5   2   6  883.81   76.19
  -6  -2  -6   21.20   31.40
   6   2   6   -5.60   34.40
   6   2   6   35.40   28.30
  -7  -2  -6  263.57   51.59
   7   2   6  384.16   64.29
   7   2   6  420.56   57.49
  -8  -2  -6  304.47   55.49
   8   2   6  235.88   59.79
   9  -3  -6   84.89   27.90
   9  -3  -6   77.69   32.90
  -9   3   6  -25.50   59.79
   8  -3  -6  177.18   34.30
   8  -3  -6  120.99   31.20
  -8   3   6   93.49   60.79
   7  -3  -6  212.18   32.50
   7  -3  -6  186.68   35.00
  -7   3   6  179.08   53.99
   6  -3  -6   59.49   21.50
   6  -3  -6  108.99   25.60
  -6   3   6  134.69   37.30
  -6   3   6   74.99   41.70
   5  -3  -6  628.84   52.09
   5  -3  -6  637.24   52.39
  -5   3   6  632.44   73.79
  -5   3   6  679.83   54.99
  -5   3   6  645.24   61.79
   4  -3  -6  445.96   41.50
   4  -3  -6  496.35   40.50
   4  -3  -6  355.16   35.30
   4  -3  -6  488.05   39.70
  -4   3   6  451.15   49.70
  -4   3   6  533.15   42.80
  -4   3   6  543.05   57.49
   3  -3  -6  248.88   27.50
   3  -3  -6  187.98   26.70
   3  -3  -6  213.98   24.00
   3  -3  -6  183.68   26.80
  -3   3   6  268.47   28.70
  -3   3   6  256.27   39.10
  -3   3   6  267.67   43.70
  -3   3   6  231.08   26.60
   2  -3  -6  194.58   23.10
   2  -3  -6  211.28   27.10
   2  -3  -6  206.08   15.20
   2  -3  -6  179.08   16.10
   2  -3  -6  196.88   23.60
   2  -3  -6  205.08   28.00
  -2   3   6  154.98   29.20
  -2   3   6  208.78   36.10
  -2   3   6  269.57   41.80
  -2   3   6  238.88   30.10
   1  -3  -6  359.46   31.40
   1  -3  -6  338.97   38.10
   1  -3  -6  349.17   32.60
  -1   3   6  452.35   48.30
  -1   3   6  441.16   39.80
  -1   3   6  302.97   39.20
  -1   3   6  297.17   41.80
   0  -3  -6   35.80   15.50
   0  -3  -6   21.50   12.90
   0  -3  -6   46.80   19.10
   0   3   6   29.00   22.90
   0   3   6   25.80   22.00
   0   3   6   44.80   24.00
   0   3   6   24.90    8.70
  -1  -3  -6 2343.27  135.99
  -1  -3  -6 2117.09  140.69
  -1  -3  -6 2246.48  139.39
   1   3   6 2268.57  133.69
   1   3   6 2051.29  144.19
   1   3   6 1947.31  140.99
   1   3   6 2216.08  138.39
  -2  -3  -6    7.50   16.10
  -2  -3  -6   12.00   18.50
   2   3   6  -24.70   19.20
   2   3   6  -17.50   19.70
   2   3   6   14.80   15.70
   2   3   6    3.50   19.00
  -3  -3  -6 1415.16   96.39
  -3  -3  -6 1194.38   95.79
   3   3   6 1373.36  101.49
   3   3   6 1411.96   97.29
   3   3   6 1376.56   95.59
  -4  -3  -6   -9.20   22.40
   4   3   6   17.30   26.20
   4   3   6  -18.70   20.00
  -5  -3  -6   42.50   30.00
   5   3   6   76.39   34.00
   5   3   6  131.39   38.60
  -6  -3  -6    7.90   32.60
   6   3   6    7.10   29.80
   6   3   6   14.30   35.30
  -7  -3  -6  116.59   38.60
  -7  -3  -6   41.40   37.50
   7   3   6   92.59   39.90
   7   3   6   72.29   44.40
   8   3   6   10.40   40.00
   9  -4  -6  -11.40   30.60
   9  -4  -6    7.40   24.50
  -9   4   6  -81.19   58.79
   8  -4  -6  590.74   60.99
   8  -4  -6  557.74   61.19
  -8   4   6  482.95   87.19
   7  -4  -6  -16.00   18.10
   7  -4  -6    4.20   23.00
  -7   4   6  -32.00   50.49
   6  -4  -6  884.51   70.59
   6  -4  -6  894.31   72.19
  -6   4   6  976.30  103.59
  -6   4   6 1096.59  108.69
   5  -4  -6  -13.60   16.10
   5  -4  -6    2.20   14.90
   5  -4  -6  -13.20   16.00
   5  -4  -6  -16.10   12.50
  -5   4   6    1.20   36.50
  -5   4   6  -29.80   26.70
  -5   4   6  -16.80   14.90
   4  -4  -6  461.05   40.80
   4  -4  -6  532.65   43.30
   4  -4  -6  436.96   39.30
   4  -4  -6  525.05   45.20
  -4   4   6  480.75   49.60
  -4   4   6  462.25   42.20
  -4   4   6  489.75   64.49
  -4   4   6  509.35   54.19
   3  -4  -6   11.20   12.90
   3  -4  -6   36.40   18.60
   3  -4  -6   28.10   13.80
   3  -4  -6   53.99   18.50
  -3   4   6   21.80   27.00
  -3   4   6   54.39   22.80
  -3   4   6   42.50   32.10
  -3   4   6   17.00   13.50
   2  -4  -6  121.39   20.20
   2  -4  -6   91.29   10.00
   2  -4  -6  153.28   20.00
   2  -4  -6  108.19   21.90
   2  -4  -6   93.19   23.70
  -2   4   6   84.19   15.30
  -2   4   6   88.99   25.70
  -2   4   6  106.79   29.50
  -2   4   6  124.49   35.90
   1  -4  -6  660.03   40.90
   1  -4  -6  661.73   44.30
   1  -4  -6  505.35   46.60
   1  -4  -6  517.95   48.00
   1  -4  -6  455.55   49.40
  -1   4   6  638.74   56.49
  -1   4   6  577.94   59.29
  -1   4   6  561.04   54.29
  -1   4   6  643.84   41.70
   0  -4  -6  965.40   66.29
   0  -4  -6  991.30   76.29
   0  -4  -6  915.11   71.19
   0  -4  -6 1051.89   66.09
   0   4   6  910.71   77.39
   0   4   6 1033.10   78.49
   0   4   6  914.71   79.19
   0   4   6 1086.39   61.79
  -1  -4  -6  333.77   39.10
  -1  -4  -6  372.26   38.80
  -1  -4  -6  312.57   28.40
   1   4   6  319.67   41.20
   1   4   6  224.48   37.10
   1   4   6  289.67   30.20
   1   4   6  328.17   43.40
  -2  -4  -6  513.95   52.59
  -2  -4  -6  563.04   48.80
   2   4   6  572.84   51.59
   2   4   6  434.06   51.39
   2   4   6  467.15   50.99
   2   4   6  393.36   47.20
  -3  -4  -6  226.68   37.80
  -3  -4  -6  222.28   35.40
   3   4   6  264.87   39.40
   3   4   6  206.38   39.10
  -4  -4  -6  267.37   43.10
  -4  -4  -6  301.57   42.60
   4   4   6  330.97   48.50
   4   4   6  264.57   44.90
  -5  -4  -6  895.31   80.89
  -5  -4  -6 1010.80   81.49
   5   4   6  789.22   81.49
   5   4   6  944.51   86.59
  -6  -4  -6  113.49   38.10
  -6  -4  -6   77.19   32.70
   6   4   6  141.89   45.00
   6   4   6   97.79   36.50
  -7  -4  -6  427.36   63.49
  -7  -4  -6  664.13   68.29
   7   4   6  558.44   68.29
   9  -5  -6   89.09   39.90
   9  -5  -6   95.49   42.80
  -9   5   6   47.80   67.59
  -9   5   6  172.98   50.99
   8  -5  -6  235.88   41.00
   8  -5  -6  155.38   38.00
  -8   5   6  157.88   69.09
   7  -5  -6  249.68   36.90
   7  -5  -6  263.57   37.70
  -7   5   6  138.39   59.79
   6  -5  -6    9.60   21.30
   6  -5  -6   72.09   24.50
  -6   5   6    7.70   49.70
   5  -5  -6   12.80   15.10
   5  -5  -6   -3.90   16.80
   5  -5  -6   18.60   17.80
   5  -5  -6   17.70   22.10
  -5   5   6  -13.60   26.90
  -5   5   6   27.30   31.20
  -5   5   6   16.70   41.60
   4  -5  -6 1272.47   87.19
   4  -5  -6 1341.27   84.79
   4  -5  -6 1082.69   84.09
   4  -5  -6 1157.58   88.39
  -4   5   6 1112.39   91.49
  -4   5   6 1360.26   86.99
  -4   5   6 1251.87  104.79
   3  -5  -6   -2.30   17.80
   3  -5  -6    9.90   16.70
   3  -5  -6    9.40   16.30
   3  -5  -6  -13.70   11.70
  -3   5   6   10.20   19.00
  -3   5   6    7.30   34.90
  -3   5   6    2.30   25.20
  -3   5   6   -1.20   13.40
   2  -5  -6 2573.24  151.98
   2  -5  -6 2343.17  153.28
   2  -5  -6 2405.76  145.29
   2  -5  -6 2086.59  148.59
  -2   5   6 2504.55  145.59
  -2   5   6 2157.88  161.08
  -2   5   6 2357.96  152.78
  -2   5   6 2331.87  154.68
   1  -5  -6  172.08   19.00
   1  -5  -6  274.27   24.50
   1  -5  -6  283.57   38.00
   1  -5  -6  168.38   28.60
   1  -5  -6  194.08   29.10
  -1   5   6  193.28   35.30
  -1   5   6  181.18   31.10
  -1   5   6  175.88   40.80
   0  -5  -6 1575.64   88.39
   0  -5  -6 1144.79   96.29
   0  -5  -6 1494.75   95.99
   0   5   6 1568.34  100.49
   0   5   6 1258.97   99.19
   0   5   6 1067.99  100.59
  -1  -5  -6   79.59   16.10
  -1  -5  -6  109.59   27.90
  -1  -5  -6  130.59   27.50
   1   5   6   97.19   29.20
   1   5   6   69.09   28.70
   1   5   6  103.29   21.70
   1   5   6   97.59   30.90
  -2  -5  -6    8.00   20.90
  -2  -5  -6   31.10   22.10
  -2  -5  -6    9.90   13.10
   2   5   6   15.60   23.80
   2   5   6   -6.70   21.50
   2   5   6    1.40   20.50
  -3  -5  -6  201.38   35.50
  -3  -5  -6  289.67   42.30
   3   5   6  172.08   37.20
  -4  -5  -6  507.95   58.79
  -4  -5  -6  552.54   58.69
   4   5   6  485.55   60.69
   4   5   6  419.06   58.09
  -5  -5  -6  204.48   43.80
  -5  -5  -6  187.18   39.90
   5   5   6  175.18   49.40
   5   5   6  138.49   42.80
  -6  -5  -6   68.39   35.90
  -6  -5  -6   88.69   37.30
   6   5   6  166.78   49.50
   6   5   6   21.30   41.50
  -7  -5  -6  -17.40   37.40
  -7  -5  -6  -40.50   34.80
   7   5   6    5.30   38.60
   8  -6  -6  224.68   41.20
   8  -6  -6  246.18   43.40
  -8   6   6  249.18   47.80
  -8   6   6  220.58   73.29
   7  -6  -6   65.19   25.40
   7  -6  -6   46.30   28.50
  -7   6   6   35.90   56.49
   6  -6  -6  711.53   61.99
   6  -6  -6  715.73   60.99
  -6   6   6  676.73   92.99
   5  -6  -6    3.80   19.20
   5  -6  -6  105.19   29.90
   5  -6  -6   38.20   21.00
   5  -6  -6   13.30   18.40
  -5   6   6   16.50   29.80
  -5   6   6   43.80   52.09
   4  -6  -6  443.66   48.40
   4  -6  -6  382.56   45.90
   4  -6  -6  481.65   42.50
   4  -6  -6  558.04   51.89
  -4   6   6  532.05   57.19
  -4   6   6  474.85   46.40
  -4   6   6  616.04   79.19
   3  -6  -6  321.97   41.90
   3  -6  -6  351.06   33.10
   3  -6  -6  331.77   42.80
   3  -6  -6  400.06   42.70
  -3   6   6  305.47   59.49
  -3   6   6  360.96   46.60
  -3   6   6  333.37   34.90
   2  -6  -6   58.89   26.10
   2  -6  -6   62.89   22.60
   2  -6  -6   29.10   21.20
  -2   6   6   55.29   27.10
  -2   6   6   23.60   20.20
  -2   6   6   25.00   40.80
   1  -6  -6   16.00   21.50
   1  -6  -6    9.90   19.80
   1  -6  -6   24.80   21.80
  -1   6   6   30.60   34.60
  -1   6   6   16.30   21.40
  -1   6   6  -18.30   26.90
   0  -6  -6  894.11   77.19
   0  -6  -6 1086.59   67.99
   0  -6  -6  905.21   76.79
   0   6   6 1089.89   81.19
   0   6   6  787.22   84.09
   0   6   6 1072.19   77.69
   0   6   6 1027.90   82.59
  -1  -6  -6   54.69   30.10
  -1  -6  -6   75.39   16.60
  -1  -6  -6  109.39   29.20
   1   6   6   81.19   29.20
   1   6   6   90.19   33.10
   1   6   6   59.79   33.70
   1   6   6  129.69   26.00
  -2  -6  -6  724.83   79.89
  -2  -6  -6  979.60   75.49
  -2  -6  -6  781.12   69.19
   2   6   6  664.93   68.79
   2   6   6  861.81   76.09
  -3  -6  -6   -0.40   28.80
  -3  -6  -6  -11.70   25.60
   3   6   6    5.00   30.60
  -4  -6  -6  290.97   47.40
  -4  -6  -6  312.77   49.00
   4   6   6  258.87   50.59
  -5  -6  -6   50.79   37.30
  -5  -6  -6   85.19   37.50
   5   6   6  103.39   42.40
  -6  -6  -6   23.60   36.10
  -6  -6  -6  -76.29   29.90
   6   6   6   -8.20   40.20
   8  -7  -6    6.60   31.80
   8  -7  -6   -9.30   30.70
  -8   7   6  -36.90   58.59
  -8   7   6  111.89   38.00
   7  -7  -6  263.37   41.60
   7  -7  -6  430.96   52.09
  -7   7   6  345.67   49.40
  -7   7   6  248.48   70.89
   6  -7  -6   25.90   22.60
   6  -7  -6    4.70   23.70
  -6   7   6  -50.79   49.70
   5  -7  -6  395.76   51.49
   5  -7  -6  361.46   43.10
   5  -7  -6  282.47   43.10
  -5   7   6  319.67   68.39
   4  -7  -6  175.28   35.90
   4  -7  -6  263.67   40.80
   4  -7  -6  325.77   39.10
  -4   7   6  266.07   63.59
  -4   7   6  306.07   43.30
   3  -7  -6    6.10   24.90
   3  -7  -6   -1.70   19.50
   3  -7  -6   -5.00   21.90
  -3   7   6  -26.20   40.10
  -3   7   6    1.40   28.00
   2  -7  -6  728.73   66.69
   2  -7  -6  622.84   65.19
   2  -7  -6  797.22   62.29
  -2   7   6  818.32   65.49
  -2   7   6  687.13   87.89
  -2   7   6  853.71   69.79
   1  -7  -6  244.88   34.40
   1  -7  -6  160.08   34.60
   1  -7  -6  217.88   41.30
  -1   7   6  244.48   55.19
  -1   7   6  249.97   44.00
  -1   7   6  209.78   35.60
   0  -7  -6  216.58   40.70
   0  -7  -6  214.18   33.60
   0  -7  -6  161.38   33.70
   0   7   6  193.18   35.60
   0   7   6  196.88   39.00
   0   7   6  148.49   34.40
   0   7   6  201.08   48.20
  -1  -7  -6  358.76   41.00
  -1  -7  -6  533.95   60.49
  -1  -7  -6  451.35   55.59
   1   7   6  557.84   60.99
   1   7   6  510.05   66.49
  -2  -7  -6   79.09   34.90
  -2  -7  -6   64.49   32.60
   2   7   6   68.19   32.60
   2   7   6   86.69   36.50
  -3  -7  -6   23.90   32.70
  -3  -7  -6   88.69   32.60
   3   7   6   84.99   37.10
  -4  -7  -6  469.45   60.09
  -4  -7  -6  521.35   63.59
   4   7   6  362.96   60.89
  -5  -7  -6   31.70   36.50
  -5  -7  -6    1.60   35.60
   5   7   6   82.19   43.10
   6   7   6  505.65  115.79
   7  -8  -6    5.50   26.40
  -7   8   6  -14.00   54.39
  -7   8   6   74.39   34.70
   6  -8  -6  -29.70   23.20
  -6   8   6  -36.50   50.59
  -6   8   6   64.49   30.60
   5  -8  -6  348.07   43.40
   5  -8  -6  266.67   45.20
  -5   8   6  274.17   70.49
   4  -8  -6  -12.30   19.50
   4  -8  -6   43.20   29.50
   4  -8  -6    4.90   25.90
  -4   8   6  -22.80   49.20
   3  -8  -6  762.02   75.49
   3  -8  -6  934.51   70.89
   3  -8  -6  830.42   77.79
  -3   8   6  941.51   77.39
  -3   8   6  778.82   97.79
   2  -8  -6   11.10   27.70
   2  -8  -6   38.50   23.00
   2  -8  -6   13.10   28.80
  -2   8   6   -1.90   47.80
  -2   8   6   27.80   30.60
   1  -8  -6  670.93   60.59
   1  -8  -6  766.82   73.69
   1  -8  -6  862.91   78.39
  -1   8   6  706.13   72.09
  -1   8   6  713.73   73.29
  -1   8   6  615.14   62.19
  -1   8   6  570.84   82.59
   0  -8  -6   64.19   26.90
   0  -8  -6   89.09   34.50
   0  -8  -6   62.69   31.40
   0   8   6   55.59   31.10
   0   8   6  121.39   33.70
   0   8   6   54.09   46.70
  -1  -8  -6  196.88   43.60
  -1  -8  -6  216.68   43.90
  -1  -8  -6  152.28   32.60
   1   8   6  197.98   42.10
   1   8   6  137.09   45.10
  -2  -8  -6  587.84   64.49
  -2  -8  -6  424.76   57.99
   2   8   6  515.85   64.59
   2   8   6  385.46   61.49
  -3  -8  -6   51.49   36.40
  -3  -8  -6    3.30   31.10
   3   8   6   85.99   42.00
  -4  -8  -6  439.16   61.99
  -4  -8  -6  558.94   66.39
   4   8   6  405.36   63.09
  -5  -8  -6   43.50   38.20
  -5  -8  -6   27.40   37.80
   5   8   6   31.70   46.10
   6  -9  -6   18.20   25.70
  -6   9   6   48.90   60.49
   5  -9  -6  401.46   48.90
  -5   9   6  474.15   85.79
   4  -9  -6  101.89   37.50
   4  -9  -6   34.20   32.50
   4  -9  -6   96.79   28.10
  -4   9   6  166.78   64.79
   3  -9  -6  327.17   52.69
   3  -9  -6  205.78   46.90
   3  -9  -6  381.76   44.50
  -3   9   6  380.36   51.09
  -3   9   6  233.48   72.89
   2  -9  -6  -23.30   31.30
   2  -9  -6   -1.40   22.40
   2  -9  -6    0.20   29.20
  -2   9   6  -13.90   50.89
   1  -9  -6   50.29   25.40
   1  -9  -6   88.19   37.50
   1  -9  -6   17.00   32.50
  -1   9   6   48.70   37.50
  -1   9   6   99.29   52.99
   0  -9  -6  -36.30   30.90
   0  -9  -6   -8.30   23.90
   0  -9  -6   -7.20   31.00
   0   9   6  -35.20   41.70
   0   9   6   -1.70   26.60
   0   9   6    4.90   25.70
  -1  -9  -6  563.04   68.39
  -1  -9  -6  558.14   68.49
   1   9   6  434.86   67.69
   1   9   6  606.44   66.89
  -2  -9  -6   15.30   34.80
  -2  -9  -6   35.60   35.30
   2   9   6   10.50   32.30
   2   9   6   63.29   40.30
  -3  -9  -6  371.86   58.29
  -3  -9  -6  367.76   54.89
   3   9   6  455.35   68.69
  -4  -9  -6  -49.50   34.30
  -4  -9  -6   -7.50   38.40
   4   9   6  -39.40   43.30
   5 -10  -6   23.90   26.60
   5 -10  -6  -50.49   31.40
  -5  10   6  -25.70   59.19
   4 -10  -6  123.59   39.70
   4 -10  -6  130.59   39.70
   4 -10  -6  123.89   32.20
  -4  10   6   85.29   57.99
   3 -10  -6  141.09   41.20
   3 -10  -6  161.58   44.00
  -3  10   6   42.10   54.19
   2 -10  -6  -35.80   32.80
   2 -10  -6   37.30   33.60
  -2  10   6   -5.00   51.09
  -2  10   6  -52.89   35.20
   1 -10  -6  355.66   56.69
   1 -10  -6  381.86   58.09
  -1  10   6  413.06   81.49
  -1  10   6  307.47   54.59
   0 -10  -6  100.69   39.80
   0 -10  -6  107.49   39.70
   0  10   6   30.40   49.00
  -1 -10  -6  155.88   42.00
  -1 -10  -6  144.89   44.40
   1  10   6  193.58   46.60
   1  10   6  144.89   52.69
  -2 -10  -6   66.19   36.30
  -2 -10  -6   11.00   37.40
   2  10   6   44.00   40.50
  -3 -10  -6   51.89   62.79
  -3 -10  -6  132.69   43.20
   3  10   6   61.09   49.00
   4 -11  -6  186.48   69.89
   3 -11  -6    2.20   38.30
   3 -11  -6   44.80   38.40
  -3  11   6  -18.60   41.80
  -3  11   6   20.30   61.99
   2 -11  -6  515.05   68.09
   2 -11  -6  538.35   68.89
  -2  11   6  526.65   75.09
  -2  11   6  377.06   77.99
   1 -11  -6   71.59   37.30
   1 -11  -6   83.39   43.40
  -1  11   6   88.89   40.20
  -1  11   6  148.09   62.29
   0 -11  -6  318.57   58.09
   0 -11  -6  352.16   57.99
   0  11   6  415.36   77.29
  -1 -11  -6  326.67   57.09
  -1 -11  -6  273.27   66.19
   1  11   6  247.78   61.99
  -1 -13   7  171.48   52.39
  -1 -13   7   61.29   72.69
   0  13  -7   70.49   41.40
   0 -13   7   -3.90   44.00
  -1  13  -7  287.87   62.49
   3  12  -7  -46.80   35.00
  -3 -12   7  -23.80   34.30
   2  12  -7   -7.50   35.30
  -2 -12   7  -15.50   35.90
   1  12  -7  165.78   44.50
  -1 -12   7  168.58   45.90
   0  12  -7  414.06   61.89
   0 -12   7  436.86   64.59
   0 -12   7  402.46   64.09
  -1  12  -7    3.90   32.10
   1 -12   7   31.90   39.60
  -2  12  -7  537.55   68.49
  -2  12  -7  646.44   70.39
   2 -12   7  440.56   71.39
  -3  12  -7  142.69   45.40
   3 -12   7   77.49   48.10
   5  11  -7   72.39   57.29
  -5 -11   7   10.30   42.00
   4  11  -7  359.06   60.39
  -4 -11   7  438.56   67.69
   3  11  -7    8.30   34.30
  -3 -11   7  -18.60   30.70
   2  11  -7  331.87   58.09
  -2 -11   7  549.74   70.49
   1  11  -7   27.00   34.80
  -1 -11   7   10.40   32.90
   0  11  -7  231.88   43.40
   0  11  -7  184.48   41.80
   0 -11   7  149.59   43.00
   0 -11   7  170.68   44.70
  -1  11  -7   64.29   36.40
  -1  11  -7   55.49   30.10
   1 -11   7   53.09   25.20
   1 -11   7   43.60   35.90
   1 -11   7   28.30   39.70
  -2  11  -7   83.59   31.00
  -2  11  -7   42.10   37.80
   2 -11   7   42.10   37.60
  -3  11  -7   -6.10   36.80
   3 -11   7   56.39   41.20
  -4  11  -7  694.63   80.59
   4 -11   7  370.36   61.69
   6  10  -7   18.00   51.29
  -6 -10   7   29.70   43.20
   5  10  -7  200.18   51.59
  -5 -10   7  117.79   39.30
   4  10  -7   11.50   33.20
  -4 -10   7   26.30   31.20
   3  10  -7  434.36   60.59
  -3 -10   7  472.75   62.39
   2  10  -7   17.80   29.80
   2  10  -7   11.70   23.40
  -2 -10   7   77.69   33.50
   1  10  -7  169.58   39.60
   1  10  -7  265.97   44.50
  -1 -10   7  187.98   43.80
   0  10  -7 1047.70   84.49
   0  10  -7  857.11   78.89
   0 -10   7  963.50   80.29
   0 -10   7  849.61   82.69
   0 -10   7  870.01   71.59
  -1  10  -7   66.49   29.80
  -1  10  -7   56.79   34.00
   1 -10   7  -25.60   31.30
   1 -10   7   44.10   23.70
   1 -10   7   49.20   34.60
  -2  10  -7  772.52   80.19
  -2  10  -7  860.21   71.69
   2 -10   7  693.03   75.89
  -3  10  -7   14.50   37.50
   3 -10   7   47.90   36.70
  -4  10  -7  158.98   49.99
   4 -10   7   97.59   44.90
  -5  10  -7   -4.40   42.00
   5 -10   7  -17.50   40.70
   6   9  -7   26.10   43.20
  -6  -9   7   24.20   35.30
   5   9  -7  383.36   63.69
  -5  -9   7  405.06   62.19
   4   9  -7   88.09   39.60
  -4  -9   7   64.29   34.80
   3   9  -7   24.20   31.10
  -3  -9   7   13.90   26.70
   2   9  -7   27.60   25.30
   2   9  -7   76.09   31.80
  -2  -9   7   99.59   34.90
   1   9  -7  442.66   54.49
   1   9  -7  474.95   56.19
  -1  -9   7  408.66   55.79
   0   9  -7    8.80   24.90
   0   9  -7   56.59   30.60
   0  -9   7   37.50   27.70
   0  -9   7   70.29   19.70
   0  -9   7   24.10   30.70
   0  -9   7   40.90   18.00
  -1   9  -7  525.65   54.39
  -1   9  -7  489.95   61.69
   1  -9   7  571.64   50.59
   1  -9   7  605.84   68.29
   1  -9   7  539.35   60.09
  -2   9  -7   29.10   33.60
  -2   9  -7   12.50   22.00
   2  -9   7    5.10   31.40
   2  -9   7    4.90   31.70
  -3   9  -7   64.49   37.30
   3  -9   7   28.10   34.30
  -4   9  -7  345.97   58.79
   4  -9   7  329.77   56.79
  -5   9  -7  -27.50   40.20
   5  -9   7   -1.80   40.00
  -6   9  -7  473.25   73.19
   6  -9   7  412.56   71.29
   7   8  -7    0.40   42.80
  -7  -8   7   -7.70   33.10
  -7  -8   7   10.90   35.00
   6   8  -7   66.59   47.00
  -6  -8   7   54.59   34.40
   5   8  -7  398.86   61.49
  -5  -8   7  399.96   56.19
   4   8  -7  -13.20   30.30
  -4  -8   7   21.70   26.40
   3   8  -7  814.82   72.39
  -3  -8   7  707.63   69.79
   2   8  -7   12.40   22.40
   2   8  -7    3.30   23.50
  -2  -8   7   -6.40   22.80
   1   8  -7  694.93   66.59
   1   8  -7  537.45   54.09
   1   8  -7  477.75   45.80
  -1  -8   7  577.84   48.80
  -1  -8   7  531.05   58.09
   0   8  -7   12.10   26.10
   0   8  -7  -18.50   19.30
   0   8  -7   -1.60   17.40
   0  -8   7   11.10   14.40
   0  -8   7   32.60   26.20
   0  -8   7    2.80   15.30
   0  -8   7    7.00   24.60
  -1   8  -7   20.20   20.30
  -1   8  -7   11.80   28.30
   1  -8   7   -5.60   23.10
   1  -8   7    4.30   16.60
   1  -8   7   -8.60   27.30
  -2   8  -7  128.09   25.80
  -2   8  -7   60.29   33.20
   2  -8   7   10.80   30.50
   2  -8   7   64.19   30.20
  -3   8  -7  555.94   64.89
   3  -8   7  472.95   59.19
   3  -8   7  498.05   59.79
  -4   8  -7   91.19   38.10
   4  -8   7   88.39   39.80
  -5   8  -7  609.64   73.99
   5  -8   7  642.94   75.89
  -6   8  -7  -41.80   37.00
   6  -8   7    1.80   36.40
   7  -8   7  142.19   60.59
   8   7  -7  150.58   62.09
  -8  -7   7   87.49   39.30
  -8  -7   7   60.29   41.00
   7   7  -7  105.59   54.99
  -7  -7   7   48.80   35.00
  -7  -7   7  101.09   39.20
   6   7  -7   82.69   44.20
  -6  -7   7  135.39   39.50
  -6  -7   7  109.29   39.40
   5   7  -7  214.58   48.70
  -5  -7   7  182.88   41.20
   4   7  -7 1276.27   81.79
   4   7  -7 1104.49   97.49
  -4  -7   7 1171.68   92.89
   3   7  -7    4.00   22.30
   3   7  -7    4.80   12.60
   3   7  -7   -6.80   20.50
  -3  -7   7  -24.60   21.80
  -3  -7   7  -14.00   13.20
   2   7  -7  741.63   55.99
   2   7  -7  688.53   63.49
   2   7  -7  713.93   65.79
  -2  -7   7  757.72   57.39
  -2  -7   7  834.02   67.99
   1   7  -7  992.00   73.59
   1   7  -7  710.93   66.19
   1   7  -7 1051.89   78.09
  -1  -7   7  965.00   75.99
  -1  -7   7  949.80   68.49
  -1  -7   7 1036.30   69.89
   0   7  -7   37.50   24.60
   0   7  -7   49.99   20.60
   0  -7   7   67.59   26.90
   0  -7   7   55.19   18.00
   0  -7   7   62.19   23.30
   0  -7   7   37.30   17.80
   0  -7   7   50.99   15.30
  -1   7  -7  967.90   88.59
  -1   7  -7 1192.28   87.99
  -1   7  -7 1274.07   85.39
   1  -7   7 1260.97   94.09
   1  -7   7 1120.79   84.09
   1  -7   7 1362.26   93.29
   1  -7   7 1263.57   87.49
  -2   7  -7   31.80   27.90
  -2   7  -7    4.80   15.60
   2  -7   7   -9.30   18.60
   2  -7   7    7.20   24.20
   2  -7   7   32.90   29.00
  -3   7  -7  981.70   85.09
   3  -7   7 1070.09   84.59
   3  -7   7  970.10   81.59
  -4   7  -7   39.20   33.20
   4  -7   7  -20.00   28.60
  -5   7  -7  312.27   54.59
   5  -7   7  297.37   52.79
  -6   7  -7   51.19   41.10
   6  -7   7   19.90   41.60
  -7   7  -7   36.40   40.10
   7  -7   7   55.19   45.30
   8   6  -7  598.54   91.09
  -8  -6   7  848.72   78.19
  -8  -6   7  751.42   78.69
   7   6  -7   73.29   46.80
  -7  -6   7   -6.80   30.90
  -7  -6   7    3.20   30.20
   6   6  -7 1164.18  107.49
   6   6  -7 1148.49   81.79
  -6  -6   7 1169.78   94.79
  -6  -6   7 1118.79   94.79
   5   6  -7    6.00   33.60
   5   6  -7   27.70   16.30
  -5  -6   7   33.40   29.40
  -5  -6   7   85.89   33.60
   4   6  -7  395.36   53.39
   4   6  -7  466.05   39.50
  -4  -6   7  461.35   39.00
  -4  -6   7  387.66   50.79
  -4  -6   7  472.95   50.99
   3   6  -7  227.38   27.30
   3   6  -7  256.27   39.00
   3   6  -7  213.88   36.10
  -3  -6   7  201.38   25.50
  -3  -6   7  230.38   39.00
  -3  -6   7  234.48   34.10
   2   6  -7   -0.70   12.70
   2   6  -7   -0.50   18.40
   2   6  -7    1.20   21.00
  -2  -6   7   -1.90   15.80
  -2  -6   7    6.00   12.80
  -2  -6   7    8.50   19.70
   1   6  -7  671.23   58.49
   1   6  -7  770.12   65.79
   1   6  -7  726.03   60.29
  -1  -6   7  820.82   56.99
  -1  -6   7  868.31   60.09
  -1  -6   7  778.32   65.89
   0   6  -7 1067.39   74.69
   0   6  -7  992.90   79.39
   0  -6   7  966.30   79.59
   0  -6   7 1138.89   74.09
   0  -6   7 1043.60   75.39
   0  -6   7 1064.59   72.69
  -1   6  -7  302.87   37.70
  -1   6  -7  281.97   41.00
  -1   6  -7  364.56   34.10
   1  -6   7  411.96   33.10
   1  -6   7  283.07   36.80
   1  -6   7  354.16   45.50
   1  -6   7  309.57   34.60
  -2   6  -7  939.11   68.49
  -2   6  -7  864.81   71.19
  -2   6  -7  882.81   61.89
   2  -6   7  844.72   67.89
   2  -6   7  764.42   72.69
  -3   6  -7  441.76   45.80
  -3   6  -7  390.96   50.89
   3  -6   7  416.26   51.69
   3  -6   7  351.56   48.40
  -4   6  -7   71.89   31.00
   4  -6   7  115.79   32.30
   4  -6   7   78.09   34.00
  -5   6  -7  732.53   70.39
   5  -6   7  609.84   71.29
  -6   6  -7   15.90   36.60
   6  -6   7    3.80   39.60
  -7   6  -7  169.38   48.40
   7  -6   7  197.88   49.90
   8   5  -7  115.19   28.70
   8   5  -7   49.50   52.09
  -8  -5   7  133.49   39.20
   7   5  -7  149.19   28.70
   7   5  -7  126.39   52.79
  -7  -5   7  176.28   43.30
  -7  -5   7  141.19   41.10
   6   5  -7   28.10   18.30
   6   5  -7   -9.40   35.70
  -6  -5   7   11.80   29.00
  -6  -5   7   48.90   30.30
   5   5  -7   19.60   16.40
   5   5  -7  -24.20   30.30
  -5  -5   7   33.60   25.00
  -5  -5   7    7.30   24.00
  -5  -5   7    0.30   12.00
   4   5  -7 1013.20   85.59
   4   5  -7 1136.99   74.89
  -4  -5   7 1042.40   80.59
  -4  -5   7  997.30   70.99
  -4  -5   7 1078.79   82.59
   3   5  -7  -16.80   19.40
   3   5  -7   22.40   20.40
   3   5  -7  -11.70   12.90
  -3  -5   7   -2.50   11.80
  -3  -5   7   22.70   22.80
  -3  -5   7   -6.00   18.50
   2   5  -7 2203.48  144.99
   2   5  -7 2302.47  142.79
   2   5  -7 2314.67  148.59
  -2  -5   7 2158.88  146.69
  -2  -5   7 2237.28  138.89
  -2  -5   7 2210.48  142.69
   1   5  -7   26.50   17.00
   1   5  -7   32.40   17.70
   1   5  -7   35.80   20.50
  -1  -5   7   24.40   15.60
  -1  -5   7   69.29   23.80
  -1  -5   7   17.20   12.50
  -1  -5   7   18.40   17.30
   0   5  -7  470.75   47.10
   0   5  -7  505.05   41.10
   0  -5   7  512.65   41.70
   0  -5   7  430.96   47.50
   0  -5   7  493.65   42.10
   0  -5   7  513.85   42.30
  -1   5  -7   81.19   26.10
  -1   5  -7  110.09   18.90
  -1   5  -7  130.09   16.20
  -1   5  -7   96.69   22.20
   1  -5   7   42.70   17.40
   1  -5   7   80.19   30.00
   1  -5   7  121.19   23.40
   1  -5   7  113.29   19.80
  -2   5  -7   60.79   26.00
  -2   5  -7  142.59   25.60
   2  -5   7  129.99   27.70
   2  -5   7  102.99   30.40
  -3   5  -7  161.68   33.70
  -3   5  -7   44.50   22.70
   3  -5   7  102.19   23.10
   3  -5   7  103.09   29.30
   3  -5   7  126.19   32.90
  -4   5  -7  831.72   74.29
   4  -5   7  816.22   73.99
   4  -5   7  832.62   76.29
  -5   5  -7    4.60   30.10
   5  -5   7   25.00   31.90
   5  -5   7   43.50   27.30
  -6   5  -7  498.95   62.09
   6  -5   7  307.17   54.29
  -7   5  -7   76.89   39.80
   7  -5   7  126.19   49.20
  -8   5  -7  -80.99   41.30
   9   4  -7   15.70   54.19
   9   4  -7  121.99   31.30
  -9  -4   7   49.60   39.50
  -9  -4   7  292.07   69.69
   8   4  -7   23.30   45.40
   8   4  -7   29.70   23.60
  -8  -4   7   61.89   34.60
   7   4  -7   10.60   37.30
   7   4  -7   28.90   21.10
  -7  -4   7   17.00   31.50
  -7  -4   7   43.70   29.90
   6   4  -7  453.75   46.90
   6   4  -7  562.84   73.79
  -6  -4   7  517.25   54.19
  -6  -4   7  409.26   53.39
   5   4  -7  147.59   38.10
   5   4  -7  168.28   26.20
  -5  -4   7  211.18   37.20
  -5  -4   7  191.78   34.70
   4   4  -7  327.57   47.50
   4   4  -7  283.87   32.50
  -4  -4   7  346.07   40.40
  -4  -4   7  344.37   29.50
  -4  -4   7  264.47   38.30
   3   4  -7  309.97   33.10
   3   4  -7  271.27   38.10
   3   4  -7  321.87   24.10
  -3  -4   7  341.97   38.80
  -3  -4   7  270.77   27.80
  -3  -4   7  350.86   42.80
   2   4  -7  391.86   45.10
   2   4  -7  458.85   30.00
   2   4  -7  357.66   39.80
   2   4  -7  399.86   41.10
  -2  -4   7  384.66   34.70
  -2  -4   7  458.15   49.40
  -2  -4   7  445.76   43.60
   1   4  -7  262.47   35.20
   1   4  -7  267.87   32.30
   1   4  -7  272.37   30.50
  -1  -4   7  240.78   25.70
  -1  -4   7  294.77   27.70
  -1  -4   7  310.07   32.30
  -1  -4   7  230.68   35.10
   0   4  -7 2781.42  164.78
   0   4  -7 2499.85  173.28
   0   4  -7 2733.03  167.98
   0  -4   7 2843.92  169.98
   0  -4   7 2795.82  168.38
   0  -4   7 2898.01  169.28
   0  -4   7 2577.64  175.68
  -1   4  -7  323.67   26.80
  -1   4  -7  276.27   32.20
  -1   4  -7  301.17   25.90
  -1   4  -7  235.98   34.60
   1  -4   7  258.07   30.20
   1  -4   7  312.57   32.70
   1  -4   7  195.98   36.80
  -2   4  -7 2912.01  182.58
  -2   4  -7 2615.54  184.48
   2  -4   7 3028.50  189.88
   2  -4   7 2894.41  184.38
   2  -4   7 3115.09  178.48
  -3   4  -7   84.69   22.60
  -3   4  -7   76.29   27.40
   3  -4   7   89.89   29.80
   3  -4   7   78.49   22.70
   3  -4   7   84.99   27.00
  -4   4  -7  497.45   54.09
  -4   4  -7  427.76   45.90
   4  -4   7  448.66   57.39
   4  -4   7  499.35   56.29
  -5   4  -7   84.59   32.80
   5  -4   7  118.89   34.40
   5  -4   7   50.59   35.10
  -6   4  -7   22.90   33.00
   6  -4   7   39.20   39.00
  -7   4  -7  116.29   39.80
   7  -4   7  143.09   46.80
  -8   4  -7  147.79   46.50
  -8   4  -7  218.48   47.20
   8  -4   7  179.78   53.89
   9   3  -7  274.37   43.80
   9   3  -7  237.58   64.59
  -9  -3   7  269.57   73.89
  -9  -3   7  297.37   65.59
   8   3  -7   -2.60   45.30
   8   3  -7   15.80   23.70
  -8  -3   7   46.90   48.90
  -8  -3   7  -34.20   31.00
   7   3  -7  783.42   61.99
   7   3  -7  576.84   79.39
  -7  -3   7  678.53   68.09
  -7  -3   7  697.33   80.79
   6   3  -7  114.89   19.90
   6   3  -7   74.29   36.30
   6   3  -7   76.79   23.70
  -6  -3   7   78.89   29.20
  -6  -3   7   79.49   28.40
   5   3  -7  808.72   62.79
   5   3  -7  880.71   58.49
   5   3  -7  743.73   74.39
  -5  -3   7  928.01   69.79
  -5  -3   7  803.52   67.79
   4   3  -7  513.95   37.60
   4   3  -7  500.45   56.39
   4   3  -7  572.24   45.20
  -4  -3   7  493.75   48.80
  -4  -3   7  475.25   37.80
  -4  -3   7  467.55   46.50
   3   3  -7  448.56   47.00
   3   3  -7  446.36   34.10
   3   3  -7  466.95   40.90
  -3  -3   7  473.65   47.20
  -3  -3   7  509.85   36.70
  -3  -3   7  479.55   46.90
   2   3  -7 1428.06   99.29
   2   3  -7 1494.45   99.99
   2   3  -7 1528.25  103.59
   2   3  -7 1618.74   93.29
  -2  -3   7 1496.65  102.29
  -2  -3   7 1474.65   98.99
  -2  -3   7 1463.65   93.89
  -2  -3   7 1415.96   91.29
   1   3  -7  425.86   35.60
   1   3  -7  328.67   28.60
   1   3  -7  441.46   40.50
   1   3  -7  443.46   38.60
  -1  -3   7  425.16   31.30
  -1  -3   7  371.36   38.10
  -1  -3   7  435.46   42.60
  -1  -3   7  406.56   34.40
   0   3  -7  754.32   52.39
   0   3  -7  724.43   59.29
   0   3  -7  822.62   51.89
   0  -3   7  661.83   62.69
   0  -3   7  757.62   57.19
   0  -3   7  775.42   53.19
  -1   3  -7  776.32   52.19
  -1   3  -7  734.73   48.90
  -1   3  -7  585.54   57.29
  -1   3  -7  702.53   54.99
   1  -3   7  698.53   61.79
   1  -3   7  767.72   54.79
   1  -3   7  725.33   54.69
  -2   3  -7  150.18   24.20
  -2   3  -7  111.79   25.70
  -2   3  -7  145.19   21.70
   2  -3   7  149.09   34.30
   2  -3   7  170.78   23.20
   2  -3   7  124.79   26.40
   2  -3   7   99.49   22.90
  -3   3  -7   14.90   16.00
  -3   3  -7   18.60   22.60
   3  -3   7    2.60   26.60
   3  -3   7   18.40   21.10
   3  -3   7    4.50   19.20
  -4   3  -7  658.13   55.99
  -4   3  -7  724.23   63.09
   4  -3   7  639.24   65.09
   4  -3   7  633.64   66.69
   4  -3   7  726.73   58.29
  -5   3  -7   -2.90   19.20
  -5   3  -7   -6.30   25.60
   5  -3   7  -15.40   26.70
  -6   3  -7  657.93   65.79
   6  -3   7  576.34   67.49
  -7   3  -7  -40.20   29.20
  -7   3  -7   36.60   30.00
   7  -3   7    2.20   39.70
  -8   3  -7  353.46   53.69
   8  -3   7  232.28   54.29
   9   2  -7  293.27   45.20
  -9  -2   7  312.47   67.99
   8   2  -7   35.80   21.30
   8   2  -7  108.69   52.59
   8   2  -7   53.99   26.90
  -8  -2   7   60.09   49.60
  -8  -2   7   97.39   37.30
   7   2  -7  110.19   27.60
   7   2  -7   99.39   22.50
   7   2  -7  112.89   44.30
  -7  -2   7  119.69   49.80
  -7  -2   7   58.49   33.30
   6   2  -7   -3.70   13.40
   6   2  -7   -2.70   16.80
   6   2  -7  -14.90   27.90
  -6  -2   7   30.90   25.60
  -6  -2   7   -4.80   22.20
   5   2  -7  715.03   48.60
   5   2  -7  558.04   50.79
   5   2  -7  603.44   62.59
  -5  -2   7  626.64   56.49
  -5  -2   7  662.63   56.19
   4   2  -7   60.29   25.40
   4   2  -7   99.59   21.30
   4   2  -7   89.19   15.50
  -4  -2   7   71.79   23.40
  -4  -2   7   48.70   23.30
  -4  -2   7   82.09   12.90
   3   2  -7 2367.56  154.48
   3   2  -7 2450.15  143.29
   3   2  -7 2375.26  143.59
   3   2  -7 2346.77  150.18
   3   2  -7 2409.86  145.59
  -3  -2   7 2482.25  153.78
  -3  -2   7 2251.27  151.08
  -3  -2   7 2315.77  143.79
   2   2  -7  -20.90   12.30
   2   2  -7    8.60   10.50
   2   2  -7    9.60   14.30
   2   2  -7  -14.90   14.40
   2   2  -7   -3.70    8.30
   2   2  -7   15.50    7.90
  -2  -2   7   -2.50   15.70
  -2  -2   7   -8.30   17.50
  -2  -2   7    1.40    9.70
   1   2  -7 1554.64   99.19
   1   2  -7 1562.84  102.39
   1   2  -7 1799.72  105.79
   1   2  -7 1518.75   96.09
  -1  -2   7 1448.96   94.29
  -1  -2   7 1436.76  105.69
  -1  -2   7 1539.35  102.39
   0   2  -7   69.39   14.90
   0   2  -7  109.29   15.00
   0   2  -7   74.19   20.60
   0  -2   7   78.79   15.30
   0  -2   7   75.09   20.90
   0  -2   7   62.49   25.20
   0  -2   7   89.39   18.50
  -1   2  -7  403.66   41.00
  -1   2  -7  411.26   37.40
   1  -2   7  473.85   33.70
   1  -2   7  525.45   42.20
   1  -2   7  397.86   38.10
   1  -2   7  464.35   50.29
  -2   2  -7  515.35   43.20
  -2   2  -7  479.05   45.20
  -2   2  -7  489.05   43.00
   2  -2   7  499.25   42.00
   2  -2   7  478.75   44.10
   2  -2   7  558.84   50.69
   2  -2   7  534.15   52.69
  -3   2  -7  398.06   41.60
  -3   2  -7  467.15   44.70
  -3   2  -7  407.66   38.30
   3  -2   7  277.07   40.60
   3  -2   7  388.66   34.50
   3  -2   7  444.46   46.00
   3  -2   7  519.15   58.29
  -4   2  -7  539.85   47.40
  -4   2  -7  515.85   51.19
  -4   2  -7  531.35   52.99
   4  -2   7  456.85   52.49
   4  -2   7  459.35   60.39
   4  -2   7  578.64   51.59
  -5   2  -7 1193.68   88.09
  -5   2  -7 1050.69   85.69
   5  -2   7 1098.79   90.79
   5  -2   7 1085.79   83.29
  -6   2  -7   55.99   31.00
  -6   2  -7  -18.30   26.80
   6  -2   7  -16.60   29.80
  -7   2  -7  201.78   46.00
  -7   2  -7  209.98   48.90
   7  -2   7  210.68   49.70
  -8   2  -7  220.68   47.50
   8  -2   7  187.38   55.99
   9   1  -7   60.39   28.20
   9   1  -7   59.29   24.70
  -9  -1   7  122.29   63.29
   8   1  -7  106.09   26.30
   8   1  -7   85.39   30.50
  -8  -1   7  105.79   38.30
  -8  -1   7   55.59   49.40
   7   1  -7  467.15   43.40
   7   1  -7  450.95   48.70
   7   1  -7  416.66   64.69
  -7  -1   7  428.96   55.09
  -7  -1   7  400.76   68.49
   6   1  -7  216.38   28.20
   6   1  -7  132.59   39.80
   6   1  -7  206.98   33.00
  -6  -1   7  242.28   40.60
  -6  -1   7  206.48   51.19
   5   1  -7  832.72   61.79
   5   1  -7  756.42   71.59
   5   1  -7  849.32   57.59
  -5  -1   7  768.02   64.79
  -5  -1   7  636.54   78.99
  -5  -1   7  771.22   62.09
   4   1  -7  907.11   62.39
   4   1  -7  895.91   73.39
   4   1  -7 1048.00   68.29
  -4  -1   7  898.21   68.69
  -4  -1   7  928.21   69.69
  -4  -1   7  751.22   74.99
   3   1  -7  220.08   18.00
   3   1  -7  200.98   31.90
   3   1  -7  219.48   24.60
   3   1  -7  234.18   21.20
   3   1  -7  193.78   27.80
  -3  -1   7  197.08   18.80
  -3  -1   7  130.29   32.50
  -3  -1   7  214.68   31.70
  -3  -1   7  191.48   30.20
   2   1  -7  358.56   40.10
   2   1  -7  475.65   34.80
   2   1  -7  457.95   36.90
   2   1  -7  480.45   40.40
   2   1  -7  426.66   42.30
   2   1  -7  479.25   32.70
  -2  -1   7  452.65   45.30
  -2  -1   7  429.46   46.20
  -2  -1   7  421.86   43.50
   1   1  -7  677.03   54.29
   1   1  -7  794.12   44.60
   1   1  -7  694.33   50.19
   1   1  -7  701.83   49.99
   1   1  -7  695.53   54.29
   1   1  -7  607.04   47.50
  -1  -1   7  737.03   44.80
  -1  -1   7  630.14   58.89
  -1  -1   7  655.43   56.49
  -1  -1   7  657.63   54.89
   0   1  -7  -12.40   14.00
   0   1  -7   -2.30   11.50
   0   1  -7    7.70    8.40
   0  -1   7  -13.40    9.00
   0  -1   7   15.70   13.80
   0  -1   7    4.50   22.80
   0  -1   7    2.60   17.20
  -1   1  -7 3108.49  203.68
  -1   1  -7 3223.88  202.38
   1  -1   7 3408.36  203.98
   1  -1   7 3456.95  198.58
   1  -1   7 3120.29  200.78
   1  -1   7 3526.05  211.08
  -2   1  -7   -6.90   15.30
  -2   1  -7  -11.50   15.20
  -2   1  -7   -2.50   12.00
   2  -1   7   -7.00   14.50
   2  -1   7   -9.60   17.40
   2  -1   7   -9.60   21.60
   2  -1   7  -20.60   14.90
  -3   1  -7 2015.20  132.29
  -3   1  -7 2077.19  132.69
  -3   1  -7 2047.30  128.39
   3  -1   7 2078.99  128.99
   3  -1   7 2233.18  134.09
   3  -1   7 1874.51  138.89
   3  -1   7 1812.82  135.09
  -4   1  -7  166.78   29.50
  -4   1  -7  138.19   29.20
  -4   1  -7  127.89   22.90
   4  -1   7  135.09   30.70
   4  -1   7  142.09   31.40
  -5   1  -7  631.94   59.99
  -5   1  -7  585.64   58.49
   5  -1   7  623.04   66.09
   5  -1   7  640.94   59.49
  -6   1  -7  157.38   42.50
  -6   1  -7  284.47   47.10
   6  -1   7  329.07   44.00
   6  -1   7  205.98   46.80
  -7   1  -7    9.10   29.70
   7  -1   7    6.50   35.80
  -8   1  -7  191.68   52.39
   8  -1   7   75.59   50.59
   9   0  -7    9.70   24.70
   9   0  -7   22.70   24.20
  -9   0   7    5.50   59.39
   8   0  -7  568.74   59.89
   8   0  -7  660.13   56.99
  -8   0   7  532.75   89.29
   7   0  -7    6.80   18.20
   7   0  -7   20.60   22.50
  -7   0   7  -32.50   29.70
  -7   0   7   50.49   46.20
   6   0  -7 1230.38   90.79
   6   0  -7 1332.27  103.29
   6   0  -7 1275.57   87.29
  -6   0   7 1190.68   95.29
   5   0  -7  105.69   20.80
   5   0  -7   66.79   20.10
   5   0  -7  127.49   34.10
  -5   0   7  109.89   26.80
  -5   0   7   68.19   26.30
  -5   0   7  125.09   41.80
   4   0  -7  544.85   53.59
   4   0  -7  641.54   45.30
   4   0  -7  581.34   49.10
   4   0  -7  597.64   45.90
  -4   0   7  637.64   61.39
  -4   0   7  531.95   56.09
  -4   0   7  531.05   51.09
   3   0  -7 1053.19   65.59
   3   0  -7 1028.90   66.89
   3   0  -7 1002.80   59.39
   3   0  -7  959.40   68.89
   3   0  -7 1040.30   72.69
  -3   0   7  815.02   70.69
  -3   0   7  804.72   72.49
  -3   0   7  925.21   77.89
   2   0  -7   72.09   19.10
   2   0  -7   45.30    9.30
   2   0  -7   39.50   16.20
   2   0  -7   58.49   18.20
   2   0  -7   81.79   16.50
  -2   0   7   49.00   24.50
  -2   0   7   69.49   24.90
  -2   0   7   46.20   23.10
   1   0  -7 2733.43  172.28
   1   0  -7 2729.73  173.78
   1   0  -7 2902.41  175.18
   1   0  -7 2760.32  167.08
   1   0  -7 2795.42  168.58
  -1   0   7 2762.92  176.58
  -1   0   7 2890.51  175.78
  -1   0   7 2794.42  178.08
   0   0  -7  251.57   29.70
   0   0  -7  240.68   27.70
   0   0   7  254.57   34.40
   0   0   7  207.98   27.20
   0   0   7  259.97   38.70
   0   0   7  203.08   21.80
  -1   0  -7  719.73   56.69
  -1   0  -7  781.62   56.49
   1   0   7  790.52   55.29
   1   0   7  739.63   60.79
   1   0   7  862.51   68.99
   1   0   7  729.13   53.49
   1   0   7  692.63   53.59
   1   0   7  814.82   65.99
  -2   0  -7   74.69   19.60
  -2   0  -7   52.39   19.50
   2   0   7   90.39   23.40
   2   0   7   26.80   23.30
   2   0   7   53.29   20.00
   2   0   7  111.19   32.90
  -3   0  -7  228.58   31.80
  -3   0  -7  291.27   28.00
  -3   0  -7  225.28   33.50
   3   0   7  297.97   33.70
   3   0   7  288.27   47.80
   3   0   7  213.28   36.80
   3   0   7  230.78   35.00
  -4   0  -7   34.30   25.50
  -4   0  -7   24.30   20.80
   4   0   7   50.49   25.00
[truncated: 196,373 more chars]
