# Supplementary material
Source: MDPI journal article supplement (https://www.mdpi.com/2304-6740/7/10/122)
Supplement: s1 [file s1 › MnH5As2O9.cif]

data_global       

_publ_contact_author_name
  
;       
Matthias Weil       
;       
  
_publ_contact_author_address  
  
;  
Institute for Chemical Technologies and Analytics
Division of Structural Chemistry
TU Wien
Getreidemarkt 9/164-SC
A-1060 Vienna
Austria       
;  
  
_publ_contact_author_phone      '+43 1 58801 17122'
_publ_contact_author_fax        '+43 1 58801 17199'  
_publ_contact_author_email      'matthias.weil@tuwien.ac.at'
_publ_contact_letter
;
Please consider this CIF submission as supporting information
for Inorganic Chemistry.
;
_publ_requested_journal
;
data deposition
;
_publ_requested_category
;
;
_publ_requested_coeditor_name   ?
_journal_date_recd_electronic      ?
_journal_date_to_coeditor       ?
_journal_date_from_coeditor     ?       
_journal_date_accepted     ?
_journal_date_printers_first    ?       
_journal_date_printers_final    ?       
_journal_date_proofs_out        ?       
_journal_date_proofs_in ?       
_journal_coeditor_name  ?       
_journal_coeditor_code     ?
_journal_paper_category      ?
_journal_coeditor_notes   ?       
_journal_techeditor_code      ?
_iucr_compatibility_tag          ?
_journal_techeditor_notes ?       
_journal_coden_ASTM     ?       
_journal_name_full      ?       
_journal_year   ?       
_journal_volume ?       
_journal_issue  ?       
_journal_page_first     ?       
_journal_page_last      ?       
_journal_suppl_publ_number      ?       
_journal_suppl_publ_pages       ?       
  
_publ_section_title             
;   
data deposition
;
loop_       
  
 _publ_author_name       
 _publ_author_address       

'Weil, Matthias'
;  
Institute for Chemical Technologies and Analytics
Division of Structural Chemistry
TU Wien
Getreidemarkt 9/164-SC
A-1060 Vienna
Austria       
; 

_publ_section_abstract
;
;
_publ_section_comment
;
;
_publ_section_exptl_prep
;
;

_publ_section_exptl_refinement
;
;

_publ_section_references
;


;
_publ_section_acknowledgements
;
;

_publ_section_figure_captions
;
;
 
data_MnH5As2O8.5
 
_audit_creation_method            'SHELXL-2018/3'
_shelx_SHELXL_version_number      '2018/3'
_chemical_name_systematic         ?
_chemical_name_common             ?
_chemical_melting_point           ?
_chemical_formula_moiety          '(As2 Mn O8), 0.5(O H2)'
_chemical_formula_sum
 'As2 H5 Mn O8.50' 
_chemical_formula_weight          345.82

loop_
 _atom_type_symbol
 _atom_type_description
 _atom_type_scat_dispersion_real
 _atom_type_scat_dispersion_imag
 _atom_type_scat_source
 'O'  'O'   0.0106   0.0060
 'International Tables Vol C Tables 4.2.6.8 and 6.1.1.4'
 'H'  'H'   0.0000   0.0000
 'International Tables Vol C Tables 4.2.6.8 and 6.1.1.4'
 'Mn'  'Mn'   0.3368   0.7283
 'International Tables Vol C Tables 4.2.6.8 and 6.1.1.4'
 'As'  'As'   0.0499   2.0058
 'International Tables Vol C Tables 4.2.6.8 and 6.1.1.4'
 
_space_group_crystal_system       triclinic
_space_group_IT_number            2
_space_group_name_H-M_alt         'P -1'
_space_group_name_Hall            '-P 1'
 
_shelx_space_group_comment
;
The symmetry employed for this shelxl refinement is uniquely defined
by the following loop, which should always be used as a source of
symmetry information in preference to the above space-group names.
They are only intended as comments.
;
 
loop_
 _space_group_symop_operation_xyz
 'x, y, z'
 '-x, -y, -z'
 
_cell_length_a                    4.9750(10)
_cell_length_b                    5.4747(11)
_cell_length_c                    13.603(3)
_cell_angle_alpha                 98.86(3)
_cell_angle_beta                  93.63(3)
_cell_angle_gamma                 99.09(3)
_cell_volume                      360.02(13)
_cell_formula_units_Z             2
_cell_measurement_temperature     293(2)
_cell_measurement_reflns_used     2964
_cell_measurement_theta_min       4.173
_cell_measurement_theta_max       39.802
 
_exptl_crystal_description        plate
_exptl_crystal_colour             'light-pink'
_exptl_crystal_density_meas       ?
_exptl_crystal_density_method     ?
_exptl_crystal_density_diffrn     3.190          
_exptl_crystal_F_000              328
_exptl_transmission_factor_min    ?
_exptl_transmission_factor_max    ?
_exptl_crystal_size_max           0.480
_exptl_crystal_size_mid           0.180
_exptl_crystal_size_min           0.024
_exptl_absorpt_coefficient_mu     10.966
_shelx_estimated_absorpt_T_min    0.077
_shelx_estimated_absorpt_T_max    0.779
_exptl_absorpt_correction_type    'multi-scan'
_exptl_absorpt_correction_T_min   0.5264 
_exptl_absorpt_correction_T_max   0.7479
_exptl_absorpt_process_details    'SADABS'
_exptl_absorpt_special_details    ?
_diffrn_ambient_temperature       293(2)
_diffrn_radiation_wavelength      0.71073
_diffrn_radiation_type            MoK\a
_diffrn_source                    ?
_diffrn_measurement_device_type   'Bruker APEX-II CCD'
_diffrn_measurement_method        '\w- and \f-scans'
_diffrn_detector_area_resol_mean  ?
_diffrn_reflns_number             4677
_diffrn_reflns_av_unetI/netI      0.0434
_diffrn_reflns_av_R_equivalents   0.0287
_diffrn_reflns_limit_h_min        -6
_diffrn_reflns_limit_h_max        6
_diffrn_reflns_limit_k_min        -7
_diffrn_reflns_limit_k_max        3
_diffrn_reflns_limit_l_min        -19
_diffrn_reflns_limit_l_max        19
_diffrn_reflns_theta_min          3.872
_diffrn_reflns_theta_max          29.996
_diffrn_reflns_theta_full         25.242
_diffrn_measured_fraction_theta_max   0.998
_diffrn_measured_fraction_theta_full  0.998
_diffrn_reflns_Laue_measured_fraction_max    0.998
_diffrn_reflns_Laue_measured_fraction_full   0.998
_diffrn_reflns_point_group_measured_fraction_max   0.998
_diffrn_reflns_point_group_measured_fraction_full  0.998
_reflns_number_total              2087
_reflns_number_gt                 1831
_reflns_threshold_expression      'I > 2\s(I)'
_reflns_Friedel_coverage          0.000
_reflns_Friedel_fraction_max      .
_reflns_Friedel_fraction_full     .
 
_reflns_special_details
;
 Reflections were merged by SHELXL according to the crystal
 class for the calculation of statistics and refinement.
 
 _reflns_Friedel_fraction is defined as the number of unique
 Friedel pairs measured divided by the number that would be
 possible theoretically, ignoring centric projections and
 systematic absences.
;
 
_computing_data_collection        'APEX2 (Bruker, 2012)'
_computing_cell_refinement        'SAINT (Bruker, 2012)'
_computing_data_reduction         'SAINT (Bruker, 2012)'
_computing_structure_solution     'SHELXS (Sheldrick, 2008)'
_computing_structure_refinement 'SHELXL-2018/3 (Sheldrick, 2018)'
_computing_molecular_graphics     ?
_computing_publication_material   ?
_refine_special_details           ?
_refine_ls_structure_factor_coef  Fsqd
_refine_ls_matrix_type            full
_refine_ls_weighting_scheme       calc
_refine_ls_weighting_details
'w=1/[\s^2^(Fo^2^)+(0.0601P)^2^+0.2994P] where P=(Fo^2^+2Fc^2^)/3'
_atom_sites_solution_primary      ?
_atom_sites_solution_secondary    ?
_atom_sites_solution_hydrogens    .
_refine_ls_hydrogen_treatment     undef
_refine_ls_extinction_method      none
_refine_ls_extinction_coef        .
_refine_ls_number_reflns          2087
_refine_ls_number_parameters      104
_refine_ls_number_restraints      0
_refine_ls_R_factor_all           0.0384
_refine_ls_R_factor_gt            0.0332
_refine_ls_wR_factor_ref          0.1053
_refine_ls_wR_factor_gt           0.1021
_refine_ls_goodness_of_fit_ref    1.132
_refine_ls_restrained_S_all       1.132
_refine_ls_shift/su_max           0.003
_refine_ls_shift/su_mean          0.000
 
loop_
 _atom_site_label
 _atom_site_type_symbol
 _atom_site_fract_x
 _atom_site_fract_y
 _atom_site_fract_z
 _atom_site_U_iso_or_equiv
 _atom_site_adp_type
 _atom_site_occupancy
 _atom_site_site_symmetry_order  
 _atom_site_calc_flag
 _atom_site_refinement_flags_posn
 _atom_site_refinement_flags_adp
 _atom_site_refinement_flags_occupancy
 _atom_site_disorder_assembly
 _atom_site_disorder_group
Mn1 Mn 0.48054(11) 0.78111(9) 0.07170(4) 0.01367(15) Uani 1 1 d . . . . .
As1 As 0.06658(7) 0.24825(6) 0.10997(3) 0.01185(13) Uani 1 1 d . . . . .
As2 As 0.42939(9) 0.16999(9) 0.67024(3) 0.02624(15) Uani 1 1 d . . . . .
O1 O 0.0335(6) 0.4492(5) 0.2161(2) 0.0240(6) Uani 1 1 d . . . . .
O2 O 0.2248(6) 0.0287(5) 0.1540(2) 0.0185(5) Uani 1 1 d . . . . .
O3 O 0.2640(5) 0.4021(4) 0.0364(2) 0.0151(5) Uani 1 1 d . . . . .
O4 O 0.3178(7) -0.0033(7) 0.3308(3) 0.0360(8) Uani 1 1 d . . . . .
O5 O 0.3456(6) 0.2647(6) 0.7839(2) 0.0254(6) Uani 1 1 d . . . . .
O6 O 0.5082(13) 0.4104(11) 0.6067(4) 0.0669(14) Uani 1 1 d . . . . .
O7 O 0.7598(5) 0.1180(5) 0.0529(2) 0.0151(5) Uani 1 1 d . . . . .
O8 O 0.8404(9) 0.0178(11) 0.4019(3) 0.0609(14) Uani 1 1 d . . . . .
OW O 0.977(5) 0.501(4) 0.5313(14) 0.122(6) Uiso 0.5 1 d . . P . .
 
loop_
 _atom_site_aniso_label
 _atom_site_aniso_U_11
 _atom_site_aniso_U_22
 _atom_site_aniso_U_33
 _atom_site_aniso_U_23
 _atom_site_aniso_U_13
 _atom_site_aniso_U_12
Mn1 0.0120(3) 0.0099(2) 0.0188(3) 0.0029(2) 0.0016(2) 0.00040(18)
As1 0.00821(19) 0.01002(17) 0.0167(2) 0.00112(13) 0.00206(13) 0.00025(12)
As2 0.0247(2) 0.0387(3) 0.0170(2) 0.00210(19) -0.00037(17) 0.01386(19)
O1 0.0235(14) 0.0245(13) 0.0225(16) -0.0067(12) -0.0019(12) 0.0115(11)
O2 0.0184(13) 0.0191(12) 0.0213(14) 0.0051(11) 0.0035(11) 0.0103(10)
O3 0.0143(12) 0.0095(10) 0.0218(14) 0.0043(10) 0.0065(10) -0.0004(8)
O4 0.0353(19) 0.054(2) 0.0234(17) -0.0001(16) 0.0055(15) 0.0263(16)
O5 0.0232(14) 0.0338(15) 0.0211(15) 0.0001(12) 0.0005(12) 0.0155(12)
O6 0.090(4) 0.069(3) 0.051(3) 0.032(3) 0.008(3) 0.019(3)
O7 0.0098(11) 0.0126(10) 0.0218(14) 0.0050(10) -0.0013(10) -0.0026(8)
O8 0.035(2) 0.102(4) 0.034(2) -0.022(2) -0.0068(18) 0.014(2)
 
_geom_special_details
;
 All esds (except the esd in the dihedral angle between two l.s. planes)
 are estimated using the full covariance matrix.  The cell esds are taken
 into account individually in the estimation of esds in distances, angles
 and torsion angles; correlations between esds in cell parameters are only
 used when they are defined by crystal symmetry.  An approximate (isotropic)
 treatment of cell esds is used for estimating esds involving l.s. planes.
;
 
loop_
 _geom_bond_atom_site_label_1
 _geom_bond_atom_site_label_2
 _geom_bond_distance
 _geom_bond_site_symmetry_2
 _geom_bond_publ_flag
Mn1 O3 2.149(2) . ?
Mn1 O5 2.162(3) 2_666 ?
Mn1 O7 2.186(3) 1_565 ?
Mn1 O7 2.202(3) 2_665 ?
Mn1 O2 2.229(3) 1_565 ?
Mn1 O3 2.229(3) 2_665 ?
As1 O7 1.666(3) 1_455 ?
As1 O3 1.673(3) . ?
As1 O2 1.698(3) . ?
As1 O1 1.708(3) . ?
As2 O5 1.654(3) . ?
As2 O4 1.666(3) 2_656 ?
As2 O6 1.692(5) . ?
As2 O8 1.705(5) 2_656 ?
As2 OW 3.71(2) 1_455 ?
As2 OW 3.798(19) . ?
As2 OW 4.10(2) 1_445 ?
As2 OW 4.10(2) 2_666 ?
As2 OW 4.35(2) 2_656 ?
As2 OW 4.511(18) 2_766 ?
O1 OW 3.410(18) 2_666 ?
O4 OW 3.64(2) 2_666 ?
O4 OW 3.71(2) 2_656 ?
O6 OW 2.61(2) . ?
O6 OW 2.92(2) 1_455 ?
O6 OW 3.11(2) 2_666 ?
O6 OW 3.289(19) 2_766 ?
O8 OW 2.64(2) 2_766 ?
O8 OW 2.90(2) . ?
O8 OW 3.35(2) 2_756 ?
O8 OW 3.68(2) 1_545 ?
OW OW 0.89(4) 2_766 ?
 
loop_
 _geom_angle_atom_site_label_1
 _geom_angle_atom_site_label_2
 _geom_angle_atom_site_label_3
 _geom_angle
 _geom_angle_site_symmetry_1
 _geom_angle_site_symmetry_3
 _geom_angle_publ_flag
O3 Mn1 O5 94.24(12) . 2_666 ?
O3 Mn1 O7 157.92(11) . 1_565 ?
O5 Mn1 O7 98.35(12) 2_666 1_565 ?
O3 Mn1 O7 89.94(11) . 2_665 ?
O5 Mn1 O7 165.86(11) 2_666 2_665 ?
O7 Mn1 O7 82.22(11) 1_565 2_665 ?
O3 Mn1 O2 110.40(10) . 1_565 ?
O5 Mn1 O2 87.01(11) 2_666 1_565 ?
O7 Mn1 O2 88.39(11) 1_565 1_565 ?
O7 Mn1 O2 78.88(11) 2_665 1_565 ?
O3 Mn1 O3 77.24(11) . 2_665 ?
O5 Mn1 O3 104.19(11) 2_666 2_665 ?
O7 Mn1 O3 82.11(10) 1_565 2_665 ?
O7 Mn1 O3 89.91(11) 2_665 2_665 ?
O2 Mn1 O3 166.22(11) 1_565 2_665 ?
O7 As1 O3 112.52(14) 1_455 . ?
O7 As1 O2 110.51(14) 1_455 . ?
O3 As1 O2 110.77(13) . . ?
O7 As1 O1 110.25(14) 1_455 . ?
O3 As1 O1 109.32(15) . . ?
O2 As1 O1 103.07(15) . . ?
O5 As2 O4 113.23(16) . 2_656 ?
O5 As2 O6 112.4(2) . . ?
O4 As2 O6 109.7(3) 2_656 . ?
O5 As2 O8 111.2(2) . 2_656 ?
O4 As2 O8 106.1(2) 2_656 2_656 ?
O6 As2 O8 103.5(3) . 2_656 ?
O5 As2 OW 98.0(3) . 1_455 ?
O4 As2 OW 148.4(3) 2_656 1_455 ?
O6 As2 OW 49.9(4) . 1_455 ?
O8 As2 OW 64.6(4) 2_656 1_455 ?
O5 As2 OW 127.4(4) . . ?
O4 As2 OW 74.2(4) 2_656 . ?
O6 As2 OW 35.6(4) . . ?
O8 As2 OW 116.1(4) 2_656 . ?
OW As2 OW 83.1(4) 1_455 . ?
O5 As2 OW 113.9(3) . 1_445 ?
O4 As2 OW 83.1(4) 2_656 1_445 ?
O6 As2 OW 120.9(3) . 1_445 ?
O8 As2 OW 24.7(4) 2_656 1_445 ?
OW As2 OW 89.0(5) 1_455 1_445 ?
OW As2 OW 118.6(5) . 1_445 ?
O5 As2 OW 109.5(3) . 2_666 ?
O4 As2 OW 136.6(3) 2_656 2_666 ?
O6 As2 OW 43.8(4) . 2_666 ?
O8 As2 OW 63.8(4) 2_656 2_666 ?
OW As2 OW 11.8(5) 1_455 2_666 ?
OW As2 OW 74.1(5) . 2_666 ?
OW As2 OW 86.8(5) 1_445 2_666 ?
O5 As2 OW 125.3(3) . 2_656 ?
O4 As2 OW 81.2(3) 2_656 2_656 ?
O6 As2 OW 110.6(3) . 2_656 ?
O8 As2 OW 25.0(3) 2_656 2_656 ?
OW As2 OW 85.0(5) 1_455 2_656 ?
OW As2 OW 107.2(4) . 2_656 ?
OW As2 OW 11.6(5) 1_445 2_656 ?
OW As2 OW 80.7(4) 2_666 2_656 ?
O5 As2 OW 134.5(3) . 2_766 ?
O4 As2 OW 74.4(3) 2_656 2_766 ?
O6 As2 OW 35.7(3) . 2_766 ?
O8 As2 OW 108.8(3) 2_656 2_766 ?
OW As2 OW 80.2(5) 1_455 2_766 ?
OW As2 OW 7.5(6) . 2_766 ?
OW As2 OW 111.5(3) 1_445 2_766 ?
OW As2 OW 70.4(3) 2_666 2_766 ?
OW As2 OW 100.0(4) 2_656 2_766 ?
As1 O1 OW 143.5(4) . 2_666 ?
As1 O2 Mn1 127.36(16) . 1_545 ?
As1 O3 Mn1 126.87(15) . . ?
As1 O3 Mn1 123.70(13) . 2_665 ?
Mn1 O3 Mn1 102.76(11) . 2_665 ?
As2 O4 OW 145.8(4) 2_656 2_666 ?
As2 O4 OW 80.2(4) 2_656 2_656 ?
OW O4 OW 96.3(4) 2_666 2_656 ?
As2 O5 Mn1 130.63(16) . 2_666 ?
As2 O6 OW 122.3(6) . . ?
As2 O6 OW 103.8(5) . 1_455 ?
OW O6 OW 128.1(8) . 1_455 ?
As2 O6 OW 114.1(5) . 2_666 ?
OW O6 OW 112.5(6) . 2_666 ?
OW O6 OW 16.7(7) 1_455 2_666 ?
As2 O6 OW 126.8(5) . 2_766 ?
OW O6 OW 11.5(8) . 2_766 ?
OW O6 OW 118.2(4) 1_455 2_766 ?
OW O6 OW 102.1(5) 2_666 2_766 ?
As1 O7 Mn1 131.23(16) 1_655 1_545 ?
As1 O7 Mn1 130.90(14) 1_655 2_665 ?
Mn1 O7 Mn1 97.78(11) 1_545 2_665 ?
As2 O8 OW 139.6(6) 2_656 2_766 ?
As2 O8 OW 140.5(5) 2_656 . ?
OW O8 OW 17.8(7) 2_766 . ?
As2 O8 OW 88.0(5) 2_656 2_756 ?
OW O8 OW 131.6(8) 2_766 2_756 ?
OW O8 OW 121.8(4) . 2_756 ?
As2 O8 OW 91.6(4) 2_656 1_545 ?
OW O8 OW 124.9(4) 2_766 1_545 ?
OW O8 OW 112.1(6) . 1_545 ?
OW O8 OW 13.6(6) 2_756 1_545 ?
OW OW O6 133(3) 2_766 . ?
OW OW O8 97(3) 2_766 2_766 ?
O6 OW O8 104.4(7) . 2_766 ?
OW OW O8 65(3) 2_766 . ?
O6 OW O8 89.0(7) . . ?
O8 OW O8 162.2(7) 2_766 . ?
OW OW O6 94(3) 2_766 1_655 ?
O6 OW O6 128.1(8) . 1_655 ?
O8 OW O6 86.7(7) 2_766 1_655 ?
O8 OW O6 94.2(7) . 1_655 ?
OW OW O6 69(3) 2_766 2_666 ?
O6 OW O6 67.5(5) . 2_666 ?
O8 OW O6 95.2(7) 2_766 2_666 ?
O8 OW O6 79.0(6) . 2_666 ?
O6 OW O6 163.3(7) 1_655 2_666 ?
 
_refine_diff_density_max    1.232
_refine_diff_density_min   -1.418
_refine_diff_density_rms    0.217

_shelx_res_file
;
TITL mw_as_mn_0m in P-1
    isotypic.res
    created by SHELXL-2018/3 at 13:56:53 on 14-Jul-2019
CELL 0.71073   4.9750   5.4747  13.6030  98.861  93.628  99.091
ZERR    2.00   0.0010   0.0011   0.0027   0.030   0.030   0.030
LATT  1
SFAC O H MN AS
UNIT 17 10 2 4
TEMP 20

L.S. 4
BOND
FMAP 2
PLAN 20
omit -4 60
rem Xtal erhalten durch Kochen von vorher gefaelltem Feststoff im System
rem Mn-As-O mit halbkonz H3AsO4; es kristallisieren rosafarbene Kristalle
rem aus
rem Messung am ApexII im Juni 2009; Absorptionskorrektur ueber SADABS
rem Kristall war ein rosa-farbenes unfoermiges Plaettchen mit Abmessungen
rem 0.48 0.18 0.024
rem Kristall mit Oel geklebt
rem isotypic with CD structure
acta
SIZE  0.48 0.18 0.024
conn 6 3.0 OW
WGHT    0.060100    0.299400
FVAR       0.76597
MN1   3    0.480544    0.781110    0.071702    11.00000    0.01195    0.00993 =
         0.01884    0.00287    0.00157    0.00040
AS1   4    0.066583    0.248252    0.109974    11.00000    0.00821    0.01002 =
         0.01666    0.00112    0.00206    0.00025
AS2   4    0.429387    0.169985    0.670236    11.00000    0.02465    0.03871 =
         0.01703    0.00210   -0.00037    0.01386
O1    1    0.033495    0.449201    0.216081    11.00000    0.02351    0.02447 =
         0.02254   -0.00669   -0.00187    0.01149
O2    1    0.224753    0.028713    0.153971    11.00000    0.01842    0.01908 =
         0.02128    0.00514    0.00353    0.01027
O3    1    0.263997    0.402140    0.036422    11.00000    0.01425    0.00953 =
         0.02182    0.00427    0.00654   -0.00042
O4    1    0.317802   -0.003256    0.330773    11.00000    0.03534    0.05379 =
         0.02343   -0.00006    0.00551    0.02630
O5    1    0.345601    0.264715    0.783907    11.00000    0.02318    0.03384 =
         0.02111    0.00012    0.00048    0.01553
O6    1    0.508215    0.410420    0.606707    11.00000    0.08996    0.06889 =
         0.05123    0.03250    0.00829    0.01908
O7    1    0.759757    0.117990    0.052933    11.00000    0.00984    0.01264 =
         0.02179    0.00498   -0.00132   -0.00259
O8    1    0.840409    0.017771    0.401939    11.00000    0.03486    0.10246 =
         0.03393   -0.02172   -0.00685    0.01360
OW    1    0.977002    0.501019    0.531298    10.50000    0.12216
HKLF 4


REM  mw_as_mn_0m in P-1
REM wR2 = 0.1053, GooF = S = 1.132, Restrained GooF = 1.132 for all data
REM R1 = 0.0332 for 1831 Fo > 4sig(Fo) and 0.0384 for all 2087 data
REM 104 parameters refined using 0 restraints

END

WGHT      0.0601      0.3012

REM Highest difference peak  1.232,  deepest hole -1.418,  1-sigma level  0.217
Q1    1   0.8702  0.4972  0.4981  11.00000  0.05    1.23
Q2    1   0.2473  0.3708  0.1800  11.00000  0.05    1.16
Q3    1  -0.0082  0.2055  0.0586  11.00000  0.05    1.07
Q4    1   0.5752  0.2874  0.7375  11.00000  0.05    1.02
Q5    1   0.1253  0.3041  0.1659  11.00000  0.05    0.98
Q6    1   0.8929  0.1369  0.0411  11.00000  0.05    0.97
Q7    1   0.2560  0.0363  0.2414  11.00000  0.05    0.92
Q8    1  -0.1022  0.5500  0.2076  11.00000  0.05    0.91
Q9    1   0.1822  0.3227  0.0810  11.00000  0.05    0.90
Q10   1   0.2874  0.1881  0.7334  11.00000  0.05    0.85
Q11   1   0.4663  0.2075  0.7280  11.00000  0.05    0.85
Q12   1   1.0549  0.5706  0.5618  11.00000  0.05    0.84
Q13   1   0.4185  0.0432  0.6648  11.00000  0.05    0.81
Q14   1   0.1507  0.0862  0.1192  11.00000  0.05    0.79
Q15   1   0.4588  0.1020  0.3373  11.00000  0.05    0.71
Q16   1   0.2865  0.1411  0.1518  11.00000  0.05    0.70
Q17   1   0.2976  0.6141  0.2424  11.00000  0.05    0.69
Q18   1   0.5495  0.2454  0.0378  11.00000  0.05    0.69
Q19   1   0.4234  0.9399  0.0802  11.00000  0.05    0.69
Q20   1   0.1084  0.2848  0.2171  11.00000  0.05    0.64
;
_shelx_res_checksum   17965

_shelx_hkl_file
;
   1   0   0 882.816  40.221   1
  -2   0   0 3351.64  149.15   1
   2   0   0 3243.05  149.00   1
  -3   0   0 162.750  10.091   1
   3   0   0 150.573   9.656   1
   3   0   0 155.778   9.554   2
  -4   0   0 299.245  17.450   1
   4   0   0 303.888  17.319   1
   4   0   0 311.249  17.267   2
  -5   0   0 131.517  11.205   1
   5   0   0 130.124  11.224   1
   5   0   0 133.961  11.036   2
   6   0   0 282.678  18.699   1
   7   0   0 157.664  14.829   1
   8   0   0 76.1233 12.0401   1
   8  -1   0 8.07326 8.33850   1
   7  -1   0 1.11975 6.73917   1
   6  -1   0 81.9891  9.5464   2
   6  -1   0 91.3439  9.7475   1
   5  -1   0 667.607  34.681   1
   5  -1   0 714.611  35.504   2
   4  -1   0 316.414  17.840   1
   4  -1   0 321.152  18.108   2
   4  -1   0 352.135  14.416   4
  -4   1   0 321.001  17.929   1
   3  -1   0 1275.61   60.09   1
   3  -1   0 1293.17   61.76   2
  -3   1   0 1337.05   60.21   1
   2  -1   0 136.735   7.551   2
   2  -1   0 141.121   7.596   1
   1  -1   0 169.614   8.085   1
  -1  -1   0 4186.22  188.70   1
   1   1   0 4187.71  188.58   1
  -2  -1   0 212.994  11.846   1
   2   1   0 219.632  11.723   1
  -3  -1   0 3569.26  160.42   1
   3   1   0 3474.91  160.14   1
  -4  -1   0 448.731  24.273   1
   4   1   0 455.314  23.961   1
  -5  -1   0 218.144  15.518   1
   5   1   0 241.349  15.519   1
  -6  -1   0 232.059  17.009   1
   6   1   0 241.507  17.016   1
   7   1   0 7.99161 7.56769   1
   8   1   0 20.4510  9.8630   1
   8  -2   0 169.950  15.871   1
   7  -2   0 187.574  15.388   1
   7  -2   0 199.107  16.385   2
   6  -2   0 101.646   9.689   2
   6  -2   0 95.5107  9.6014   1
   5  -2   0 382.431  21.781   1
   5  -2   0 433.477  22.490   2
   4  -2   0 352.443  18.799   1
   4  -2   0 372.330  16.119   4
   4  -2   0 354.609  19.056   2
   3  -2   0 1337.10   63.85   2
   3  -2   0 1382.24   54.22   4
   3  -2   0 1347.24   62.04   1
   3  -2   0 1336.93   84.75   3
   2  -2   0 7432.33  430.65   3
   2  -2   0 6855.81  331.80   2
   2  -2   0 7226.91  279.71   4
   2  -2   0 7041.62  320.81   1
   1  -2   0 338.040  14.464   4
   1  -2   0 336.063  21.843   3
   0  -2   0 2936.46  115.97   4
   0  -2   0 2854.67  178.57   3
   0  -2   0 3052.75  133.01   1
  -1  -2   0 477.470  24.280   2
  -1  -2   0 501.898  23.802   1
  -1  -2   0 493.570  20.190   4
   1   2   0 506.080  23.589   1
  -2  -2   0 1626.79   77.24   1
  -2  -2   0 1679.83   79.57   2
   2   2   0 1714.10   77.08   1
  -3  -2   0 169.230  12.015   1
  -3  -2   0 186.272  12.071   2
   3   2   0 183.037  11.661   1
  -4  -2   0 67.3245  7.6390   1
   4   2   0 53.3747  6.9412   1
  -5  -2   0 214.047  15.944   1
   5   2   0 233.586  15.742   1
  -6  -2   0 74.4342 10.2913   1
   6   2   0 68.8620  9.7436   1
   7   2   0 198.431  17.439   1
   8   2   0 21.3665 10.0635   1
   8  -3   0 4.58991 7.39152   1
   8  -3   0 10.6350  8.7566   2
   7  -3   0 13.7330  7.1487   2
   7  -3   0 15.1248  6.9123   1
   6  -3   0 23.5901  6.1322   1
   6  -3   0 38.2225 10.8901   3
   6  -3   0 23.1348  6.8094   2
   5  -3   0 149.919  10.888   2
   5  -3   0 149.089   9.520   4
   5  -3   0 138.048  10.273   1
   5  -3   0 141.415  15.710   3
   4  -3   0 1121.37   68.70   3
   4  -3   0 1064.92   44.20   4
   4  -3   0 1101.17   50.28   1
   4  -3   0 1020.97   51.64   2
   3  -3   0 104.185   6.714   1
   3  -3   0 109.014  10.709   3
   3  -3   0 103.193   6.714   2
   3  -3   0 105.313   7.275   4
   3  -3   0 111.006   6.827   2
   2  -3   0 4080.11  241.53   3
   2  -3   0 3888.52  157.14   4
   1  -3   0 426.697  28.151   3
   1  -3   0 433.940  18.670   4
   0  -3   0 1221.18   57.99   2
   0  -3   0 1279.73   56.35   1
   0  -3   0 1244.07   49.54   4
   0  -3   0 1178.88   76.27   3
  -1  -3   0 1679.53   79.78   2
  -1  -3   0 1676.98   67.04   4
  -1  -3   0 1691.53   77.43   1
   1   3   0 1695.09   77.13   1
  -2  -3   0 85.8388  7.7148   1
  -2  -3   0 76.7466  6.9064   2
  -2  -3   0 86.6901  5.6980   4
   2   3   0 79.1869  7.0802   1
  -3  -3   0 990.647  48.490   1
  -3  -3   0 1005.92   49.81   2
   3   3   0 1007.27   48.17   1
  -4  -3   0 356.362  21.175   1
   4   3   0 360.275  20.558   1
  -5  -3   0 55.8639  8.8623   1
   5   3   0 47.4686  8.0641   1
  -6  -3   0 236.477  18.671   1
   6   3   0 213.485  17.509   1
  -7  -3   0 5.90876 8.75374   1
   7   3   0 1.02886 8.53700   1
   8  -4   0 203.616  15.225   1
   8  -4   0 203.525  17.265   2
   7  -4   0 296.135  19.384   2
   7  -4   0 280.232  17.641   1
   6  -4   0 5.41032 4.84963   1
   6  -4   0 6.18457 5.54906   2
   5  -4   0 738.381  32.031   4
   5  -4   0 757.273  35.453   1
   5  -4   0 713.839  36.788   2
   4  -4   0 93.6409  6.4451   1
   4  -4   0 86.4343  7.2252   2
   4  -4   0 101.765   7.342   4
   4  -4   0 93.4955 10.9867   3
   3  -4   0 130.823  12.324   3
   3  -4   0 144.610   9.217   4
   2  -4   0 1118.34   70.32   3
   2  -4   0 1127.22   46.23   4
   1  -4   0 199.410  15.851   3
   1  -4   0 197.573  10.699   4
   0  -4   0 1324.56   54.58   4
   0  -4   0 1316.70   63.82   2
   0  -4   0 1399.42   61.90   1
  -1  -4   0 734.277  36.189   2
  -1  -4   0 715.766  30.381   4
  -1  -4   0 738.573  35.118   1
  -2  -4   0 409.972  17.714   4
  -2  -4   0 379.362  21.363   1
  -2  -4   0 406.068  22.268   2
  -3  -4   0 45.2110  6.9433   2
  -3  -4   0 48.3979  6.8137   1
  -4  -4   0 -2.0397  5.3894   1
  -5  -4   0 133.731  13.126   1
  -6  -4   0 -7.8970  7.2508   1
  -7  -4   0 265.748  22.039   1
   8  -5   0 18.8301  8.2946   2
   7  -5   0 3.41279 6.52115   2
   6  -5   0 274.316  17.353   2
   5  -5   0 0.72611 4.04057   2
   5  -5   0 3.82189 4.96523   4
   4  -5   0 1823.50   73.15   4
   4  -5   0 1791.88   84.41   2
   4  -5   0 1753.04   84.53   2
   3  -5   0 70.3705  6.7831   4
   3  -5   0 71.9041  9.2126   3
   2  -5   0 1835.33   76.32   4
   2  -5   0 1930.66  116.99   3
   1  -5   0 150.707  14.337   3
   1  -5   0 148.378   9.845   4
   1  -5   0 154.650   8.395   2
   1  -5   0 140.811   8.708   2
   0  -5   0 711.981  29.848   4
   0  -5   0 702.018  32.867   1
   0  -5   0 660.811  34.080   2
  -1  -5   0 712.944  36.061   2
  -1  -5   0 711.170  34.780   1
  -1  -5   0 711.229  30.360   4
  -2  -5   0 96.0545  8.8556   2
  -2  -5   0 92.5685  6.7833   4
  -2  -5   0 87.4005  8.4458   1
  -3  -5   0 270.878  18.093   2
  -3  -5   0 236.877  16.759   1
  -4  -5   0 209.082  16.311   1
  -5  -5   0 173.468  15.846   1
  -6  -5   0 69.5593 12.0719   1
   7  -6   0 80.1686  9.4025   2
   6  -6   0 24.9126  6.2798   2
   6  -6   0 32.0211  7.3892   4
   5  -6   0 201.732  12.783   2
   5  -6   0 213.657  13.871   4
   4  -6   0 11.1130  5.7071   4
   3  -6   0 153.628  11.403   4
   3  -6   0 136.868  14.974   3
   2  -6   0 49.0193  6.5479   4
   2  -6   0 59.6127 10.0493   3
   1  -6   0 277.661  15.209   4
   1  -6   0 281.036  14.885   2
   1  -6   0 281.608  15.395   2
   0  -6   0 294.311  15.253   1
   0  -6   0 271.962  14.993   4
   0  -6   0 273.758  16.419   2
  -1  -6   0 419.931  20.301   4
  -1  -6   0 448.421  24.254   2
  -1  -6   0 424.934  22.732   1
  -2  -6   0 139.053  12.206   1
  -2  -6   0 157.580  13.608   2
  -2  -6   0 151.094  10.548   4
  -3  -6   0 10.3328  7.4346   2
  -3  -6   0 4.83630 6.12343   1
  -4  -6   0 42.5096  9.3616   1
  -5  -6   0 89.0493 12.8793   1
   7  -7   0 13.4508  6.5340   2
   6  -7   0 127.442  11.367   4
   6  -7   0 122.160  10.392   2
   5  -7   0 34.5575  7.7990   4
   3  -7   0 5.50911 6.17895   4
   2  -7   0 556.120  26.755   4
   1  -7   0 11.0523  5.7116   4
   1  -7   0 16.7910  4.8892   2
   0  -7   0 21.3167  6.0284   4
   0  -7   0 28.9720  4.6672   1
   0  -7   0 23.6565  6.1370   2
  -1  -7   0 99.7970  8.7780   4
  -1  -7   0 106.720  10.437   2
  -1  -7   0 98.3706  9.4986   1
  -2  -7   0 13.4106  7.6978   2
  -2  -7   0 3.37796 5.56746   1
  -3  -7   0 198.156  16.972   1
  -3  -7   0 259.760  19.422   2
  -4  -7   0 97.1571 12.4548   1
   6  -8   0 85.6429 10.6963   4
   5  -8   0 -3.5864  7.0234   4
   4  -8   0 65.8581  9.6046   4
   3  -8   0 35.5962  8.3119   4
   2  -8   0 12.8120  7.0765   4
   1  -8   0 277.493  17.672   2
   1  -8   0 303.897  17.470   4
   0  -8   0 107.653   9.790   4
   0  -8   0 104.123  10.433   2
  -1  -8   0 39.8605  7.6897   4
  -1  -8   0 51.3028  6.8886   1
  -1  -8   0 55.4034  9.2575   2
  -2  -8   0 59.1519  8.3138   1
  -2  -8   0 62.3621 10.7649   2
  -3  -8   0 5.49212 6.77788   1
  -3  -8   0 16.9847 10.0411   2
   4  -9   0 183.165  15.113   4
   3  -9   0 10.3481  8.5790   4
   2  -9   0 182.496  14.599   4
   1  -9   0 -2.5412  7.1787   4
   1  -9   0 -2.6504  6.0166   2
   0  -9   0 41.4419  8.4849   4
   0  -9   0 37.5699  8.6170   2
  -1  -9   0 35.6246  9.5360   2
  -2  -9   0 -8.7296  8.7051   2
  -2  -9   1 10.4558  9.1928   2
  -1  -9   1 -4.7582  7.6916   2
   0  -9   1 205.560  16.233   2
   0  -9   1 214.930  15.155   4
   1  -9   1 -2.7682  5.8201   2
   1  -9   1 -6.1505  6.9230   4
   2  -9   1 346.240  20.844   4
   3  -9   1 11.5761  8.5756   4
   4  -9   1 145.943  13.416   4
  -3  -8   1 39.8870  8.4750   1
  -3  -8   1 36.7961 11.1042   2
  -2  -8   1 117.519  13.065   2
  -2  -8   1 114.099  10.704   1
  -1  -8   1 27.4224  5.5971   1
  -1  -8   1 9.21700 7.50110   2
  -1  -8   1 29.7681  7.1698   4
   0  -8   1 170.941  13.772   2
   0  -8   1 160.664  12.541   4
   1  -8   1 14.6141  5.6508   2
   1  -8   1 22.9037  7.2910   4
   2  -8   1 1.28946 6.62850   4
   3  -8   1 176.089  14.243   4
   4  -8   1 -1.7781  6.8434   4
   5  -8   1 78.2824 10.1158   4
   6  -8   1 63.6889  9.9044   4
  -4  -7   1 69.3564 11.3695   1
  -3  -7   1 139.444  13.125   1
  -3  -7   1 133.196  14.273   2
  -2  -7   1 99.6759 11.2756   2
  -2  -7   1 97.7367  9.8800   1
  -1  -7   1 56.9165  7.1463   4
  -1  -7   1 56.5693  8.2970   2
  -1  -7   1 53.2492  6.6819   1
   0  -7   1 405.221  20.373   4
   0  -7   1 382.074  22.765   2
   0  -7   1 424.268  20.591   1
   1  -7   1 1.48929 5.45219   4
   1  -7   1 -1.6795  4.1909   2
   2  -7   1 722.257  33.651   4
   2  -7   1 762.045  51.357   3
   3  -7   1 3.30033 5.92821   4
   4  -7   1 196.363  14.111   4
   5  -7   1 4.71329 6.35098   4
   6  -7   1 -1.6546  6.4722   4
   6  -7   1 -1.7284  5.0110   2
   7  -7   1 4.10718 6.01837   2
  -5  -6   1 2.73877 8.51499   1
  -4  -6   1 201.375  17.044   1
  -3  -6   1 28.2763  8.2419   2
  -3  -6   1 36.0668  7.7526   1
  -2  -6   1 605.416  33.091   2
  -2  -6   1 601.764  31.499   1
  -1  -6   1 87.3525  8.7174   2
  -1  -6   1 92.1199  8.8028   1
  -1  -6   1 102.929   7.706   4
   0  -6   1 931.243  47.104   2
   0  -6   1 972.554  40.797   4
   0  -6   1 976.427  45.026   1
   1  -6   1 92.0763  7.1467   2
   1  -6   1 109.012  13.271   3
   1  -6   1 103.435   8.057   4
   1  -6   1 101.521   7.867   2
   2  -6   1 231.356  13.652   4
   2  -6   1 229.399  20.197   3
   3  -6   1 254.569  20.996   3
   3  -6   1 246.474  14.631   4
   4  -6   1 6.82616 5.40146   4
   5  -6   1 514.557  23.895   4
   5  -6   1 465.013  24.924   2
   6  -6   1 133.273  10.529   4
   6  -6   1 118.347  10.688   2
   7  -6   1 7.49642 6.47236   2
  -6  -5   1 162.444  16.488   1
  -5  -5   1 171.050  16.422   1
  -4  -5   1 28.6978  7.5911   1
  -3  -5   1 315.968  19.964   2
  -3  -5   1 279.299  18.500   1
  -2  -5   1 79.8825  6.4572   4
  -2  -5   1 87.9702  8.1257   1
  -2  -5   1 84.6733  8.4711   2
  -1  -5   1 5.54226 3.85917   1
  -1  -5   1 0.62361 4.23210   2
  -1  -5   1 15.2951  3.9524   4
   0  -5   1 1003.04   45.17   1
   0  -5   1 945.050  40.359   4
   0  -5   1 951.981  46.818   2
   1  -5   1 292.696  15.262   4
   1  -5   1 319.898  23.590   3
   2  -5   1 795.776  34.636   4
   2  -5   1 819.962  52.763   3
   3  -5   1 399.596  28.901   3
   3  -5   1 395.613  19.172   4
   4  -5   1 109.915   8.263   2
   4  -5   1 125.009  12.925   3
   4  -5   1 101.046   7.782   2
   4  -5   1 100.346   8.306   4
   5  -5   1 113.410   8.899   4
   5  -5   1 107.737   9.099   2
   6  -5   1 6.38014 5.69201   2
   7  -5   1 59.7914  9.1025   2
   8  -5   1 -2.3258  7.2924   2
  -7  -4   1 132.328  15.818   1
  -6  -4   1 19.3495  9.0336   1
  -5  -4   1 -4.2127  6.4373   1
  -4  -4   1 324.387  20.534   1
  -3  -4   1 27.5242  6.0717   2
  -3  -4   1 26.0936  5.8487   1
  -2  -4   1 2924.89  117.15   4
  -2  -4   1 2904.15  135.67   1
  -2  -4   1 3053.63  140.23   2
  -1  -4   1 85.4458  6.7126   4
  -1  -4   1 94.5990  7.5680   1
  -1  -4   1 90.7497  7.8782   2
   0  -4   1 2725.59  170.78   3
   0  -4   1 2744.46  130.51   2
   0  -4   1 2956.84  126.43   1
   0  -4   1 2725.30  110.66   4
   1  -4   1 1236.64   75.46   3
   1  -4   1 1163.83   48.99   4
   2  -4   1 875.707  37.186   4
   2  -4   1 909.555  56.924   3
   3  -4   1 817.393  34.797   4
   3  -4   1 832.181  53.214   3
   4  -4   1 222.094  18.234   3
   4  -4   1 201.182  12.105   2
   4  -4   1 225.414  11.545   1
   4  -4   1 220.309  12.076   4
   5  -4   1 322.066  16.203   4
   5  -4   1 322.399  25.466   3
   5  -4   1 326.622  17.170   1
   5  -4   1 307.473  18.049   2
   6  -4   1 386.196  20.395   1
   6  -4   1 357.850  21.379   2
   7  -4   1 29.2093  8.0143   2
   7  -4   1 36.0756  7.1940   1
   8  -4   1 116.363  12.665   2
   8  -4   1 112.180  11.258   1
   7   3  -1 19.5031  9.3787   1
  -7  -3   1 29.0801 10.4102   1
   6   3  -1 196.153  16.456   1
  -6  -3   1 203.891  17.382   1
   5   3  -1 405.484  24.979   1
  -5  -3   1 469.600  26.099   1
   4   3  -1 109.897  10.292   1
  -4  -3   1 124.713  11.268   1
   3   3  -1 382.920  20.998   1
  -3  -3   1 404.442  22.125   2
  -3  -3   1 373.453  21.454   1
   2   3  -1 32.2007  4.4740   1
  -2  -3   1 42.9576  5.2463   2
  -2  -3   1 36.5157  5.1070   1
  -1  -3   1 27.0524  3.8649   2
  -1  -3   1 28.6968  3.0236   4
  -1  -3   1 27.0686  3.9852   1
   0  -3   1 -0.5628  1.7693   1
   0  -3   1 1.06323 3.24555   3
   0  -3   1 2.55794 2.12922   4
   1  -3   1 2231.22  135.73   3
   1  -3   1 2212.98   88.21   4
   2  -3   1 145.127  11.882   3
   2  -3   1 133.044   7.951   4
   3  -3   1 864.746  54.191   3
   3  -3   1 852.583  34.984   4
   3  -3   1 817.608  40.170   2
   3  -3   1 854.936  39.058   1
   3  -3   1 838.060  40.342   2
   4  -3   1 67.3643  9.3083   3
   4  -3   1 37.6846  4.8664   2
   4  -3   1 60.9861  5.0154   4
   4  -3   1 44.6211  5.0838   1
   5  -3   1 1.03847 7.39920   3
   5  -3   1 3.47363 3.91777   1
   5  -3   1 -0.6891  4.0576   2
   5  -3   1 5.04700 3.56430   4
   6  -3   1 67.9537 13.3105   3
   6  -3   1 45.6573  7.5254   2
   6  -3   1 42.1924  7.1040   1
   7  -3   1 247.807  17.410   1
   7  -3   1 274.726  18.694   2
   8  -3   1 -3.1034  6.9327   1
   8  -3   1 -9.0089  7.6671   2
   8   2  -1 89.0848 13.4336   1
   7   2  -1 42.8329  9.8831   1
   6   2  -1 6.97876 6.63083   1
  -6  -2   1 10.8033  7.4735   1
   5   2  -1 270.143  17.181   1
  -5  -2   1 248.775  17.584   1
   4   2  -1 872.926  43.098   1
  -4  -2   1 873.344  43.405   1
   3   2  -1 -1.4873  3.0675   1
  -3  -2   1 -3.8822  3.5730   1
  -3  -2   1 -1.9443  3.4223   2
   2   2  -1 9949.12  441.19   1
  -2  -2   1 9999.99  456.21   2
  -2  -2   1 9464.38  441.31   1
   1   2  -1 1751.30   76.84   1
  -1  -2   1 1662.31   76.94   1
  -1  -2   1 1610.99   66.55   4
  -1  -2   1 1721.98   79.41   2
   0  -2   1 6651.41  259.73   4
   0  -2   1 6783.02  298.35   1
   0  -2   1 6470.73  400.05   3
   1  -2   1 808.712  33.937   4
   1  -2   1 876.253  52.429   3
   2  -2   1 119.348   6.518   1
   2  -2   1 108.521   6.268   2
   2  -2   1 128.685  10.384   3
   2  -2   1 123.258   6.399   4
   3  -2   1 214.098  11.344   1
   3  -2   1 203.212   9.893   4
   3  -2   1 203.993  11.231   2
   4  -2   1 513.082  25.690   2
   4  -2   1 507.682  21.416   4
   4  -2   1 490.020  25.065   1
   5  -2   1 92.0745  8.1252   1
   5  -2   1 67.0995 13.7846   3
   5  -2   1 87.6047  7.9279   2
   6  -2   1 201.469  14.282   2
   6  -2   1 183.568  13.564   1
   6  -2   1 157.147  21.321   3
   7  -2   1 104.165  18.497   3
   7  -2   1 126.309  12.334   2
   7  -2   1 134.031  12.545   1
   8  -2   1 31.0061  8.8745   1
   8   1  -1 77.6470 12.5051   1
   7   1  -1 146.047  14.184   1
   6   1  -1 391.191  23.702   1
  -6  -1   1 380.148  23.669   1
   5   1  -1 310.739  18.618   1
  -5  -1   1 285.435  18.498   1
   4   1  -1 608.464  30.438   1
  -4  -1   1 587.794  30.729   1
   3   1  -1 105.317   8.064   1
  -3  -1   1 103.716   8.678   1
   2   1  -1 1683.99   76.45   1
  -2  -1   1 1656.71   76.59   1
   1   1  -1 5313.06  237.25   1
  -1  -1   1 5233.20  237.35   1
   0  -1   1 752.032  34.201   1
   1  -1   1 6878.32  462.76   3
   1  -1   1 8502.60  346.42   1
   2  -1   1 765.572  36.783   2
   2  -1   1 786.075  35.909   1
  -3   1  -1 1176.28   54.39   1
   3  -1   1 1201.81   46.61   4
   3  -1   1 1148.75   55.79   2
   3  -1   1 1161.20   54.37   1
  -4   1  -1 1329.89   62.88   1
   4  -1   1 1305.19   62.91   1
   4  -1   1 1401.40   64.71   2
   5  -1   1 11.9231  4.8792   1
   5  -1   1 9.85082 4.71142   2
   6  -1   1 92.8237  9.7271   2
   6  -1   1 84.8768  9.5546   1
   7  -1   1 351.532  34.201   3
   7  -1   1 379.999  23.251   1
   8  -1   1 32.7977  9.4894   1
   8  -1   1 45.6433 14.9745   3
   8   0  -1 24.2602  9.3860   1
   7   0  -1 210.682  16.940   1
   6   0  -1 8.77717 6.31737   1
   5   0  -1 128.482  10.781   2
   5   0  -1 134.366  11.249   1
  -5   0   1 117.938  11.261   1
   4   0  -1 3540.62  161.57   2
   4   0  -1 3340.48  156.77   1
  -4   0   1 3424.25  156.92   1
   3   0  -1 63.8131  5.8862   2
   3   0  -1 59.3447  5.2455   1
  -3   0   1 66.9033  5.6502   1
   2   0  -1 2946.13  132.37   1
  -2   0   1 2903.05  132.42   1
   1   0  -1 692.912  31.788   1
   1   0   1 470.144  21.874   1
  -2   0  -1 1002.69   45.17   1
   2   0   1 942.512  44.966   1
  -3   0  -1 -2.7673  2.5307   1
   3   0   1 -1.5046  2.5332   2
   3   0   1 0.46576 2.38212   1
  -4   0  -1 138.888  10.305   1
   4   0   1 141.818  10.382   1
   4   0   1 147.591  10.537   2
  -5   0  -1 889.412  44.152   1
   5   0   1 879.660  44.194   1
   5   0   1 915.374  45.131   2
   6   0   1 151.281  12.789   1
   7   0   1 564.197  32.273   1
   8   0   1 17.3045  8.9242   1
   8  -1  -1 33.8738  9.7335   1
   7  -1  -1 7.80874 7.13394   1
   6  -1  -1 638.832  33.270   1
   6  -1  -1 609.527  33.544   2
   5  -1  -1 -2.8003  4.1423   2
   5  -1  -1 1.22217 4.28843   1
   4  -1  -1 3033.00  144.27   1
   4  -1  -1 3269.78  148.87   2
  -4   1   1 3190.82  144.40   1
   3  -1  -1 1224.75   57.52   1
   3  -1  -1 1247.55   59.12   2
  -3   1   1 1259.73   57.59   1
   2  -1  -1 3496.18  165.13   2
   2  -1  -1 3593.80  159.95   1
   1  -1  -1 5868.63  264.14   1
   0  -1  -1 463.126  21.305   1
  -1  -1  -1 7161.79  322.71   1
   1   1   1 7188.48  322.58   1
  -2  -1  -1 474.488  23.341   1
   2   1   1 477.201  23.197   1
  -3  -1  -1 166.120  11.280   1
   3   1   1 179.927  10.951   1
  -4  -1  -1 1211.84   58.09   1
   4   1   1 1225.83   58.09   1
  -5  -1  -1 55.3091  7.4728   1
   5   1   1 51.5102  7.2795   1
  -6  -1  -1 36.3482  7.9022   1
   6   1   1 36.1394  7.7984   1
   7   1   1 57.4521 10.2043   1
   8   1   1 48.3349 11.0745   1
   8  -2  -1 28.7358  9.1589   1
   7  -2  -1 410.656  24.975   2
   7  -2  -1 389.168  23.986   1
   6  -2  -1 10.8380 10.0959   3
   6  -2  -1 42.4570  7.2411   1
   6  -2  -1 50.1209  7.4869   2
   5  -2  -1 36.4576 10.3507   3
   5  -2  -1 45.5465  6.2989   2
   5  -2  -1 46.6198  6.3566   1
   4  -2  -1 194.647   9.842   4
   4  -2  -1 197.015  11.437   2
   4  -2  -1 192.310  11.408   1
   4  -2  -1 148.334  17.154   3
   3  -2  -1 203.180  15.436   3
   3  -2  -1 191.071  10.522   1
   3  -2  -1 178.530  10.612   2
   2  -2  -1 1369.57   81.38   3
   2  -2  -1 1283.82   62.28   2
   2  -2  -1 1333.29   60.44   1
   1  -2  -1 1621.97  102.55   3
   1  -2  -1 1702.06   67.06   4
   1  -2  -1 1741.72   76.41   1
   0  -2  -1 759.197  30.458   4
   0  -2  -1 747.093  34.634   1
  -1  -2  -1 446.867  22.707   2
  -1  -2  -1 460.981  22.255   1
  -1  -2  -1 452.887  18.863   4
   1   2   1 474.391  22.084   1
  -2  -2  -1 10.5300  3.0892   2
  -2  -2  -1 3.57044 2.84300   1
   2   2   1 5.24990 2.71788   1
  -3  -2  -1 346.438  18.862   2
  -3  -2  -1 323.588  18.359   1
   3   2   1 332.715  18.130   1
  -4  -2  -1 0.31852 4.05858   1
   4   2   1 -2.0856  3.6834   1
  -5  -2  -1 1416.83   67.74   1
   5   2   1 1379.84   67.40   1
  -6  -2  -1 -2.4871  6.3831   1
   6   2   1 6.92179 6.72446   1
   7   2   1 385.155  25.478   1
   8   2   1 -0.8217  8.7888   1
   8  -3  -1 97.9233 11.8204   1
   8  -3  -1 122.151  13.314   2
   7  -3  -1 -4.9445  6.3085   2
   7  -3  -1 4.41477 6.25887   1
   6  -3  -1 1498.87   70.72   2
   6  -3  -1 1382.86   68.32   1
   5  -3  -1 88.5051 11.2785   3
   5  -3  -1 80.1329  7.3290   2
   5  -3  -1 77.5647  7.3459   1
   5  -3  -1 83.0052  6.7031   4
   4  -3  -1 3087.49  122.33   4
   4  -3  -1 3159.69  188.15   3
   4  -3  -1 2962.49  144.38   2
   4  -3  -1 3106.36  139.87   1
   3  -3  -1 74.2892  5.7593   2
   3  -3  -1 60.3415  5.2269   2
   3  -3  -1 65.8460  5.1078   1
   3  -3  -1 62.7218  7.8686   3
   3  -3  -1 63.5849  5.3672   4
   2  -3  -1 1209.86   50.06   4
   2  -3  -1 1227.86   76.09   3
   2  -3  -1 1260.45   56.03   1
   1  -3  -1 1278.59   77.40   3
   1  -3  -1 1230.22   50.64   4
   0  -3  -1 20.3870  2.6005   2
   0  -3  -1 23.8921  2.7585   1
   0  -3  -1 22.5573  2.9400   4
  -1  -3  -1 214.986  12.165   1
  -1  -3  -1 212.963  12.341   2
  -1  -3  -1 215.518  10.319   4
   1   3   1 225.001  11.864   1
  -2  -3  -1 1529.60   70.95   1
  -2  -3  -1 1509.76   73.01   2
  -2  -3  -1 1528.83   60.55   4
   2   3   1 1520.63   70.65   1
  -3  -3  -1 361.658  20.634   1
  -3  -3  -1 389.392  21.255   2
   3   3   1 364.429  20.215   1
  -4  -3  -1 221.430  14.960   1
   4   3   1 213.088  14.387   1
  -5  -3  -1 16.4575  6.8031   1
   5   3   1 18.8709  6.5646   1
  -6  -3  -1 -0.5256  7.1668   1
   6   3   1 0.99234 7.07009   1
  -7  -3  -1 8.36526 8.69242   1
   7   3   1 3.86826 8.34862   1
   8  -4  -1 80.3902  9.8264   1
   8  -4  -1 77.7649 11.5001   2
   7  -4  -1 67.9276  9.7402   2
   7  -4  -1 80.3012  8.9558   1
   6  -4  -1 0.11636 5.43295   2
   6  -4  -1 8.56968 4.87618   1
   5  -4  -1 151.627  10.747   2
   5  -4  -1 150.540  10.618   4
   5  -4  -1 142.477  10.036   1
   4  -4  -1 53.5817  5.7931   4
   4  -4  -1 58.8083  7.7646   3
   4  -4  -1 47.9534  4.5386   1
   4  -4  -1 44.2020  4.9313   2
   3  -4  -1 1665.11   77.55   2
   3  -4  -1 1644.30   77.59   2
   3  -4  -1 1642.13   67.06   4
   3  -4  -1 1647.60  101.85   3
   2  -4  -1 383.800  25.662   3
   2  -4  -1 363.102  17.467   4
   1  -4  -1 2061.25  120.60   3
   1  -4  -1 1691.82   89.02   1
   1  -4  -1 1929.09   78.54   4
   1  -4  -1 2147.73   88.60   1
   0  -4  -1 131.655   7.943   1
   0  -4  -1 116.105   8.024   2
   0  -4  -1 117.365   7.983   4
  -1  -4  -1 76.2036  7.1608   1
  -1  -4  -1 78.8277  7.4219   2
  -1  -4  -1 82.2138  6.4945   4
  -2  -4  -1 373.355  20.784   2
  -2  -4  -1 373.612  16.509   4
  -2  -4  -1 361.932  20.131   1
  -3  -4  -1 319.646  19.276   1
  -3  -4  -1 333.818  19.946   2
  -4  -4  -1 3.93146 5.47431   1
  -5  -4  -1 610.683  34.120   1
  -6  -4  -1 5.53887 8.07312   1
  -7  -4  -1 249.873  21.330   1
   8  -5  -1 123.445  12.972   2
   7  -5  -1 18.7046  7.2997   2
   6  -5  -1 810.471  41.455   2
   6  -5  -1 813.887  36.097   4
   5  -5  -1 -0.3665  5.0188   4
   5  -5  -1 3.30484 4.19413   2
   4  -5  -1 884.203  37.042   4
   4  -5  -1 820.967  41.025   2
   3  -5  -1 2.82031 4.99883   3
   3  -5  -1 5.45896 4.33463   4
   2  -5  -1 42.4338  7.7805   3
   2  -5  -1 48.2145  5.8289   4
   1  -5  -1 -0.9531  2.7666   1
   1  -5  -1 2.75960 3.69383   4
   1  -5  -1 3.07571 2.33097   2
   1  -5  -1 0.92536 2.57459   2
   0  -5  -1 195.664  11.306   4
   0  -5  -1 201.492  11.534   1
   0  -5  -1 195.746  12.044   2
  -1  -5  -1 966.734  40.176   4
  -1  -5  -1 966.236  47.767   2
  -1  -5  -1 965.633  46.209   1
  -2  -5  -1 279.896  13.522   4
  -2  -5  -1 236.506  16.070   1
  -2  -5  -1 282.250  17.172   2
  -3  -5  -1 335.177  20.580   1
  -3  -5  -1 342.133  21.449   2
  -4  -5  -1 12.7116  6.8171   1
  -5  -5  -1 260.342  19.731   1
  -6  -5  -1 27.5312 10.2087   1
   7  -6  -1 4.06148 6.55396   2
   6  -6  -1 238.024  15.394   4
   6  -6  -1 215.235  15.076   2
   5  -6  -1 163.905  11.401   2
   5  -6  -1 172.273  12.840   4
   4  -6  -1 44.6704  4.7941   2
   4  -6  -1 44.1256  7.1318   4
   3  -6  -1 961.705  41.700   4
   2  -6  -1 22.6342  5.6530   4
   1  -6  -1 187.581  11.472   2
   1  -6  -1 179.739  11.942   4
   0  -6  -1 392.156  20.005   1
   0  -6  -1 387.064  18.980   4
   0  -6  -1 384.210  21.241   2
  -1  -6  -1 44.8033  6.8825   2
  -1  -6  -1 51.4891  6.3146   1
  -1  -6  -1 41.5115  5.8076   4
  -2  -6  -1 26.0539  5.3993   4
  -2  -6  -1 26.3700  7.0076   2
  -2  -6  -1 26.3988  6.3765   1
  -3  -6  -1 235.697  18.112   2
  -3  -6  -1 226.081  16.925   1
  -4  -6  -1 1.98128 7.39202   1
  -5  -6  -1 170.049  16.339   1
   7  -7  -1 1.16339 6.22878   2
   6  -7  -1 177.678  12.697   2
   6  -7  -1 177.991  14.289   4
   5  -7  -1 45.7313  8.5430   4
   5  -7  -1 40.4789  5.5199   2
   4  -7  -1 142.257  11.755   4
   3  -7  -1 67.6576  8.6784   4
   2  -7  -1 20.6965  4.4263   2
   2  -7  -1 26.2410  6.7896   4
   1  -7  -1 40.9296  7.1079   4
   1  -7  -1 36.4665  5.8913   2
   0  -7  -1 15.4423  5.5985   4
   0  -7  -1 11.0252  4.4002   1
   0  -7  -1 8.38057 5.59913   2
  -1  -7  -1 304.101  19.882   2
  -1  -7  -1 323.506  16.826   4
  -1  -7  -1 309.574  18.091   1
  -2  -7  -1 3.07027 7.00465   2
  -2  -7  -1 3.04034 5.67950   1
  -3  -7  -1 369.302  23.202   1
  -3  -7  -1 378.420  25.473   2
  -4  -7  -1 -1.2520  7.7491   1
   6  -8  -1 126.266  12.350   4
   5  -8  -1 111.893  11.459   4
   4  -8  -1 18.1928  7.8245   4
   3  -8  -1 143.351  12.352   4
   2  -8  -1 60.4687  9.2041   4
   2  -8  -1 55.2929  6.6472   2
   1  -8  -1 229.879  14.901   4
   1  -8  -1 195.758  14.440   2
   0  -8  -1 99.5418 10.6958   2
   0  -8  -1 107.237  10.004   4
  -1  -8  -1 7.87186 7.55256   2
  -1  -8  -1 11.5483  5.4696   1
  -1  -8  -1 7.32919 6.45287   4
  -2  -8  -1 0.37296 8.21307   2
  -2  -8  -1 -2.4376  5.7158   1
  -3  -8  -1 -0.6815  9.4323   2
  -3  -8  -1 9.97470 6.95844   1
   4  -9  -1 44.4386 10.0067   4
   3  -9  -1 36.8682  9.8092   4
   2  -9  -1 21.2119  6.3600   2
   2  -9  -1 36.7898  9.2576   4
   1  -9  -1 41.8461  9.0277   4
   1  -9  -1 40.5293  7.5945   2
   0  -9  -1 1.16218 6.96355   4
   0  -9  -1 -4.5172  6.8728   2
  -1  -9  -1 134.988  13.706   2
  -2  -9   2 80.1717 12.1351   2
  -1  -9   2 2.23967 7.55628   2
   0  -9   2 219.644  15.384   4
   0  -9   2 199.063  15.826   2
   1  -9   2 6.95549 6.17481   2
   1  -9   2 -1.7528  7.2159   4
   2  -9   2 90.6460 11.0083   4
   3  -9   2 -2.2795  7.8354   4
   4  -9   2 10.3372  8.1861   4
  -3  -8   2 12.6588  7.1386   1
  -3  -8   2 14.0381  9.5565   2
  -2  -8   2 215.426  15.222   1
  -2  -8   2 216.380  18.300   2
  -1  -8   2 43.0106  6.0831   1
  -1  -8   2 36.7407  8.6035   2
   0  -8   2 171.304  13.607   2
   0  -8   2 153.634  12.572   4
   1  -8   2 75.3478  8.1783   2
   1  -8   2 88.9221  9.4205   4
   2  -8   2 18.8306  7.2439   4
   3  -8   2 266.437  17.322   4
   4  -8   2 22.9638  7.7833   4
   5  -8   2 24.4852  7.9212   4
   6  -8   2 129.956  12.215   4
  -5  -7   2 50.7043 11.4114   1
  -4  -7   2 3.38282 7.69064   1
  -3  -7   2 -2.8373  8.0200   2
  -3  -7   2 4.99157 6.95300   1
  -2  -7   2 106.767  11.490   2
  -2  -7   2 96.4074  9.8173   1
  -1  -7   2 101.887   9.524   1
  -1  -7   2 98.2907 10.1970   2
  -1  -7   2 101.132   8.782   4
   0  -7   2 244.723  14.620   4
   0  -7   2 228.418  15.756   2
   0  -7   2 253.687  13.435   1
   1  -7   2 217.049  13.382   2
   1  -7   2 209.974  13.850   4
   2  -7   2 191.959  19.240   3
   2  -7   2 159.083  12.491   4
   3  -7   2 31.3412 10.2099   3
   3  -7   2 24.9559  6.7587   4
   4  -7   2 3.69729 6.05746   4
   5  -7   2 40.1656  7.8004   4
   6  -7   2 2.43790 6.72202   4
   6  -7   2 3.41474 4.92276   2
  -6  -6   2 53.9414 12.2436   1
  -5  -6   2 -0.6514  8.4802   1
  -4  -6   2 671.701  36.885   1
  -3  -6   2 1.48909 7.08926   2
  -3  -6   2 4.27569 6.17168   1
  -2  -6   2 755.127  39.038   1
  -2  -6   2 803.573  41.094   2
  -1  -6   2 26.4166  5.0842   4
  -1  -6   2 18.8694  4.9991   1
  -1  -6   2 22.8443  5.9115   2
   0  -6   2 349.341  18.255   4
   0  -6   2 376.908  18.895   1
   0  -6   2 381.375  20.389   2
   1  -6   2 374.857  28.261   3
   1  -6   2 352.656  18.879   2
   1  -6   2 368.122  18.599   2
   1  -6   2 365.585  18.262   4
   2  -6   2 60.7199  9.9388   3
   2  -6   2 49.2967  6.4246   4
   3  -6   2 247.973  14.349   4
   3  -6   2 238.827  20.713   3
   4  -6   2 348.385  27.398   3
   4  -6   2 371.287  18.860   4
   5  -6   2 101.220   8.985   2
   5  -6   2 133.043   9.839   4
   6  -6   2 93.6921  8.8185   2
   7  -6   2 1.34693 6.17725   2
  -6  -5   2 124.413  14.677   1
  -5  -5   2 15.9869  8.5907   1
  -4  -5   2 41.8512  8.5702   1
  -3  -5   2 75.7600  9.5216   2
  -3  -5   2 66.2591  8.7163   1
  -2  -5   2 18.9504  5.5583   2
  -2  -5   2 21.0267  5.3556   1
  -1  -5   2 1235.44   60.32   2
  -1  -5   2 1202.16   50.74   4
  -1  -5   2 1282.84   58.35   1
   0  -5   2 143.073   9.664   4
   0  -5   2 153.121   9.427   2
   0  -5   2 140.754  14.639   3
   0  -5   2 149.295   9.065   1
   0  -5   2 145.123   9.754   2
   1  -5   2 737.930  48.150   3
   1  -5   2 712.312  31.110   4
   2  -5   2 157.515  14.383   3
   2  -5   2 141.656   9.884   4
   3  -5   2 42.0661  5.6663   4
   3  -5   2 55.9757  8.7727   3
   4  -5   2 127.982   8.706   2
   4  -5   2 126.556   8.400   2
   4  -5   2 137.686   9.993   4
   4  -5   2 138.309  14.316   3
   5  -5   2 394.898  22.028   2
   5  -5   2 438.163  20.493   4
   5  -5   2 432.208  31.749   3
   6  -5   2 -3.9682  5.2534   2
   7  -5   2 449.355  25.949   2
   8  -5   2 7.84024 7.76625   2
  -7  -4   2 38.9822 11.5568   1
  -6  -4   2 227.920  19.140   1
  -5  -4   2 -5.9035  6.4264   1
  -4  -4   2 781.773  40.595   1
  -3  -4   2 44.2100  7.0087   1
  -3  -4   2 43.6514  6.8443   2
  -2  -4   2 2212.72  103.03   2
  -2  -4   2 2100.32   99.73   1
  -1  -4   2 46.2175  5.3272   2
  -1  -4   2 49.1207  4.4360   4
  -1  -4   2 51.8437  5.3543   1
   0  -4   2 4.98302 2.28686   2
   0  -4   2 8.71470 5.32711   3
   0  -4   2 7.24230 2.70160   1
   0  -4   2 4.01880 2.93590   4
   1  -4   2 122.215   7.925   4
   1  -4   2 118.648  11.944   3
   2  -4   2 423.481  29.623   3
   2  -4   2 433.547  19.390   4
   3  -4   2 260.708  20.264   3
   3  -4   2 255.768  13.337   4
   4  -4   2 302.172  16.886   2
   4  -4   2 319.837  16.120   1
   4  -4   2 342.721  15.923   4
   4  -4   2 338.037  24.987   3
   5  -4   2 486.595  34.241   3
   5  -4   2 459.944  23.085   1
   5  -4   2 415.483  23.846   2
   5  -4   2 468.775  21.071   4
   6  -4   2 14.3703  5.9333   2
   6  -4   2 16.6783  5.4918   1
   6  -4   2 14.0009  9.9822   3
   7  -4   2 79.8062  9.9109   2
   7  -4   2 87.7441  9.3002   1
   8  -4   2 83.4591 11.4054   2
   8  -4   2 85.0353 10.1304   1
   7   3  -2 36.2521  9.9642   1
  -7  -3   2 33.3573 10.5942   1
   6   3  -2 434.880  26.719   1
  -6  -3   2 449.974  27.761   1
   5   3  -2 8.15704 6.11484   1
  -5  -3   2 7.69987 6.71374   1
   4   3  -2 521.081  27.807   1
  -4  -3   2 514.005  28.426   1
   3   3  -2 953.665  45.886   1
  -3  -3   2 966.268  47.555   2
  -3  -3   2 926.284  46.242   1
   2   3  -2 676.576  32.350   1
  -2  -3   2 644.632  33.498   2
  -2  -3   2 677.858  32.785   1
  -1  -3   2 2960.49  120.12   4
  -1  -3   2 3087.15  142.86   2
  -1  -3   2 3098.16  138.39   1
   0  -3   2 1.76711 1.82783   1
   0  -3   2 1.63783 3.27957   3
   0  -3   2 0.85413 1.96358   4
   1  -3   2 1904.27  116.44   3
   1  -3   2 1888.86   75.49   4
   2  -3   2 2121.65   85.44   4
   2  -3   2 2175.49  131.97   3
   3  -3   2 82.7352  5.6698   1
   3  -3   2 76.3524  5.6071   2
   3  -3   2 95.7556 10.6752   3
   3  -3   2 81.6843  6.4151   4
   3  -3   2 83.7106  5.8355   2
   4  -3   2 115.769  13.536   3
   4  -3   2 99.4693  7.9588   2
   4  -3   2 132.150   7.832   4
   4  -3   2 105.409   8.046   1
   5  -3   2 450.876  23.603   2
   5  -3   2 399.375  33.418   3
   5  -3   2 461.455  23.063   1
   6  -3   2 33.3926 12.1464   3
   6  -3   2 44.9914  7.1954   1
   6  -3   2 55.4353  7.6992   2
   7  -3   2 357.876  34.902   3
   7  -3   2 457.072  24.799   1
   7  -3   2 470.933  26.010   2
   8  -3   2 16.3988  8.8883   2
   8  -3   2 42.2314  9.0027   1
   8   2  -2 12.0905  9.3426   1
   7   2  -2 3.74130 7.72483   1
   6   2  -2 289.192  19.620   1
  -6  -2   2 281.456  20.345   1
   5   2  -2 -1.4068  5.0436   1
  -5  -2   2 3.56395 5.78388   1
   4   2  -2 1618.31   76.25   1
  -4  -2   2 1614.92   76.58   1
   3   2  -2 1003.08   48.31   1
  -3  -2   2 1023.82   49.92   2
  -3  -2   2 1016.42   48.67   1
   2   2  -2 1173.48   53.93   1
  -2  -2   2 1135.59   54.17   1
  -2  -2   2 1168.81   55.79   2
   1   2  -2 73.0848  4.9571   1
  -1  -2   2 65.1414  5.4404   1
  -1  -2   2 69.4458  4.4055   4
   0  -2   2 10.2984  1.8052   4
   0  -2   2 14.0052  3.1409   3
   0  -2   2 9.22369 1.75513   1
   1  -2   2 453.991  19.235   4
   1  -2   2 476.686  30.201   3
   2  -2   2 8.64586 3.90452   3
   2  -2   2 9.55088 2.05819   4
   2  -2   2 9.71283 1.57487   2
   2  -2   2 12.9311  1.9733   1
   3  -2   2 2801.29  132.07   2
   3  -2   2 2830.83  128.08   1
   3  -2   2 2839.19  111.34   4
   4  -2   2 47.1684  5.1236   2
   4  -2   2 46.3513  5.2850   1
   4  -2   2 60.5048 11.6688   3
   4  -2   2 55.2672  4.1465   4
   5  -2   2 1502.04   67.73   2
   5  -2   2 1390.28   65.76   1
   5  -2   2 1267.96   92.38   3
   6  -2   2 116.955  18.632   3
   6  -2   2 124.436  11.567   2
   6  -2   2 110.957  10.386   1
   7  -2   2 428.795  38.959   3
   7  -2   2 481.761  27.249   2
   7  -2   2 455.294  26.531   1
   8  -2   2 72.0902 10.7043   1
   8   1  -2 288.295  22.045   1
   7   1  -2 8.86274 7.78542   1
   6   1  -2 969.422  49.025   1
  -6  -1   2 951.077  49.063   1
   5   1  -2 159.001  12.371   1
  -5  -1   2 127.523  12.214   1
   4   1  -2 1762.85   82.23   1
  -4  -1   2 1755.53   82.40   1
   3   1  -2 1694.72   78.38   1
  -3  -1   2 1695.75   78.60   1
   2   1  -2 7.39525 2.28459   1
  -2  -1   2 5.74620 2.62063   1
   1   1  -2 5862.16  262.35   1
  -1  -1   2 5800.57  262.44   1
   0  -1   2 2434.30  109.79   1
   1  -1   2 543.154  21.763   1
   1  -1   2 387.613  29.925   3
   2  -1   2 2921.93  130.02   1
   2  -1   2 2827.79  134.08   2
  -3   1  -2 162.878   9.493   1
   3  -1   2 147.405   9.380   1
   3  -1   2 154.510   9.336   2
  -4   1  -2 678.504  33.294   1
   4  -1   2 657.304  33.287   1
   4  -1   2 705.673  34.082   2
   5  -1   2 38.3768  5.9068   2
   5  -1   2 33.3153  5.8642   1
   6  -1   2 243.380  16.503   1
   6  -1   2 241.403  16.804   2
   7  -1   2 118.583  12.247   1
   7  -1   2 130.462  21.119   3
   8  -1   2 87.5081 11.8873   1
   8  -1   2 85.5767 18.7927   3
   8   0  -2 0.08512 8.11403   1
   7   0  -2 -0.3707  7.0215   1
   6   0  -2 22.5972  7.0467   1
   5   0  -2 485.315  26.644   1
   5   0  -2 501.631  26.820   2
  -5   0   2 495.347  26.910   1
   4   0  -2 203.737  12.924   2
   4   0  -2 210.403  12.816   1
  -4   0   2 196.811  13.181   1
   3   0  -2 1607.07   74.56   1
   3   0  -2 1614.83   76.53   2
  -3   0   2 1627.15   74.66   1
   2   0  -2 284.094  14.221   1
  -2   0   2 274.728  14.297   1
   1   0  -2 2669.76  119.45   1
  -1   0   2 2622.26  119.45   1
  -1   0  -2 1014.93   46.31   1
   1   0   2 1010.13   46.27   1
  -2   0  -2 284.604  14.864   1
   2   0   2 297.595  14.739   1
  -3   0  -2 5673.69  253.51   1
   3   0   2 5482.34  253.40   1
   3   0   2 5670.35  261.58   2
  -4   0  -2 319.295  17.985   1
   4   0   2 349.029  18.271   2
   4   0   2 311.928  17.933   1
  -5   0  -2 2341.37  108.16   1
   5   0   2 2401.52  111.12   2
   5   0   2 2236.96  108.00   1
   6   0   2 2.55212 5.65096   1
   7   0   2 226.739  17.669   1
   8   0   2 61.2199 11.0092   1
   8  -1  -2 411.772  26.315   1
   7  -1  -2 10.9018  7.3609   1
   6  -1  -2 1456.95   72.65   1
   6  -1  -2 1569.98   74.57   2
   5  -1  -2 64.2979  7.3130   1
   5  -1  -2 52.6697  6.7945   2
   4  -1  -2 261.068  14.965   2
   4  -1  -2 257.235  14.853   1
  -4   1   2 260.024  14.970   1
   3  -1  -2 367.930  18.843   1
   3  -1  -2 369.451  19.077   2
  -3   1   2 384.771  18.943   1
   2  -1  -2 142.287   8.093   2
   2  -1  -2 152.454   8.225   1
   1  -1  -2 573.644  26.508   1
   0  -1  -2 5084.56  228.71   1
  -1  -1  -2 144.021   7.833   1
   1   1   2 129.429   7.659   1
  -2  -1  -2 1156.40   54.38   1
   2   1   2 1183.92   54.29   1
  -3  -1  -2 326.964  18.039   1
   3   1   2 347.198  17.955   1
  -4  -1  -2 113.278   9.683   1
   4   1   2 126.889   9.916   1
  -5  -1  -2 11.2829  5.2045   1
   5   1   2 3.43109 4.84956   1
  -6  -1  -2 578.657  32.597   1
   6   1   2 606.850  32.635   1
   7   1   2 12.3086  8.0883   1
   8   1   2 146.816  15.538   1
   8  -2  -2 88.6050 11.8015   1
   7  -2  -2 24.5576  8.0365   2
   7  -2  -2 26.7674  7.9753   1
   6  -2  -2 162.224  13.067   1
   6  -2  -2 173.287  13.568   2
   5  -2  -2 1658.17   80.39   1
   5  -2  -2 1796.97   82.75   2
   5  -2  -2 1708.02   69.37   4
   4  -2  -2 38.5547  8.0596   3
   4  -2  -2 35.2018  4.7223   1
   4  -2  -2 29.2008  4.4112   2
   3  -2  -2 2383.91  136.36   3
   3  -2  -2 2183.35  101.55   1
   3  -2  -2 2127.97  104.69   2
   2  -2  -2 9.47640 1.99954   2
   2  -2  -2 9.15068 2.60467   3
   2  -2  -2 9.55855 2.04951   1
   1  -2  -2 906.455  42.698   2
   1  -2  -2 911.495  41.665   1
   0  -2  -2 647.054  30.334   2
   0  -2  -2 628.444  25.865   4
   0  -2  -2 624.663  29.467   1
  -1  -2  -2 1344.44   52.61   4
  -1  -2  -2 1277.56   62.82   2
  -1  -2  -2 1331.19   61.07   1
   1   2   2 1346.40   60.86   1
  -2  -2  -2 389.637  21.028   2
  -2  -2  -2 413.889  20.814   1
   2   2   2 412.888  20.611   1
  -3  -2  -2 2071.10   96.87   1
  -3  -2  -2 2073.01   99.68   2
   3   2   2 2137.00   96.74   1
  -4  -2  -2 -0.1268  3.9820   1
   4   2   2 -0.7394  3.8663   1
  -5  -2  -2 930.883  47.073   1
   5   2   2 937.322  46.914   1
  -6  -2  -2 9.73230 7.04881   1
   6   2   2 12.7056  6.8293   1
   7   2   2 50.8258 10.5831   1
   8   2   2 2.71530 9.18379   1
   8  -3  -2 423.408  26.449   2
   8  -3  -2 386.932  24.809   1
   7  -3  -2 15.5414  6.9671   1
   7  -3  -2 2.86805 7.02978   2
   6  -3  -2 522.572  27.843   1
   6  -3  -2 526.864  28.921   2
   5  -3  -2 76.5165  7.2391   1
   5  -3  -2 78.6945  6.6920   4
   5  -3  -2 70.8440  7.0227   2
   4  -3  -2 271.325  13.839   4
   4  -3  -2 286.655  19.863   3
   4  -3  -2 255.661  15.169   2
   4  -3  -2 277.343  14.838   1
   3  -3  -2 102.906   6.996   2
   3  -3  -2 111.141   7.060   1
   3  -3  -2 108.144   7.262   2
   3  -3  -2 105.664   9.558   3
   3  -3  -2 111.723   7.858   4
   2  -3  -2 970.510  43.502   1
   2  -3  -2 920.038  39.037   4
   2  -3  -2 957.880  44.943   2
   2  -3  -2 940.718  58.672   3
   1  -3  -2 1588.00   95.59   3
   1  -3  -2 1479.66   71.26   1
   1  -3  -2 1613.00   73.17   2
   0  -3  -2 49.1794  4.6298   2
   0  -3  -2 48.0309  3.9833   4
   0  -3  -2 52.4353  4.1508   1
  -1  -3  -2 1951.10   90.65   1
  -1  -3  -2 1923.84   93.44   2
  -1  -3  -2 2009.79   78.50   4
   1   3   2 2024.18   90.44   1
  -2  -3  -2 68.9699  6.4938   2
  -2  -3  -2 70.3165  6.6439   1
  -2  -3  -2 78.3680  5.3911   4
   2   3   2 75.7547  7.1779   1
  -3  -3  -2 1437.79   70.23   2
  -3  -3  -2 1401.32   68.29   1
   3   3   2 1493.11   68.20   1
  -4  -3  -2 400.849  22.655   1
   4   3   2 380.836  22.156   1
  -5  -3  -2 116.398  11.593   1
   5   3   2 105.970  11.024   1
  -6  -3  -2 228.581  18.497   1
   6   3   2 225.939  17.833   1
  -7  -3  -2 1.22042 8.26062   1
   7   3   2 -5.1994  7.7742   1
   8  -4  -2 219.894  17.994   2
   8  -4  -2 205.319  15.831   1
   7  -4  -2 256.082  18.130   2
   7  -4  -2 249.020  16.384   1
   6  -4  -2 30.6216  6.5793   2
   6  -4  -2 30.9781  6.0483   1
   5  -4  -2 998.295  50.824   2
   5  -4  -2 1079.03   49.10   1
   5  -4  -2 1034.33   43.98   4
   4  -4  -2 4.11232 2.87975   1
   4  -4  -2 0.54970 3.22738   2
   4  -4  -2 6.07714 4.13041   4
   3  -4  -2 794.753  35.679   1
   3  -4  -2 764.229  33.138   4
   3  -4  -2 747.157  37.220   2
   3  -4  -2 778.122  48.967   3
   2  -4  -2 2281.33  135.97   3
   2  -4  -2 2230.24  100.41   1
   2  -4  -2 2148.98   89.15   4
   1  -4  -2 8.66365 3.22690   1
   1  -4  -2 10.4003  3.4430   4
   1  -4  -2 8.77498 2.46746   2
   0  -4  -2 228.644  11.729   4
   0  -4  -2 239.365  12.597   1
   0  -4  -2 221.963  12.879   2
  -1  -4  -2 309.323  17.610   2
  -1  -4  -2 321.833  17.261   1
  -1  -4  -2 325.900  14.877   4
  -2  -4  -2 0.56384 3.79652   2
  -2  -4  -2 1.84961 3.81213   1
  -2  -4  -2 9.53388 3.02509   4
  -3  -4  -2 674.030  35.655   1
  -3  -4  -2 726.064  36.829   2
  -4  -4  -2 214.608  15.696   1
  -5  -4  -2 274.232  19.638   1
  -6  -4  -2 49.6645 10.5323   1
  -7  -4  -2 31.1143 11.0315   1
   8  -5  -2 88.1868 11.4325   2
   7  -5  -2 70.7232  9.5697   2
   6  -5  -2 77.0591  8.6985   2
   6  -5  -2 85.5164  8.9814   4
   5  -5  -2 256.303  15.494   2
   5  -5  -2 258.070  15.226   4
   4  -5  -2 39.4120  4.6998   2
   4  -5  -2 44.8105  6.3720   4
   3  -5  -2 4.42538 3.56111   2
   3  -5  -2 8.12326 4.73850   4
   2  -5  -2 28.1034  6.6858   3
   2  -5  -2 18.4983  4.7304   4
   2  -5  -2 19.0571  3.1126   2
   1  -5  -2 818.954  36.915   4
   1  -5  -2 887.572  41.884   2
   1  -5  -2 845.879  41.945   2
   1  -5  -2 918.011  41.121   1
   0  -5  -2 21.9384  4.2776   4
   0  -5  -2 24.0483  4.3389   2
   0  -5  -2 17.1192  3.7141   1
  -1  -5  -2 2075.04   84.52   4
  -1  -5  -2 2120.40   97.27   1
  -1  -5  -2 2124.15  100.59   2
  -2  -5  -2 12.1248  5.0485   1
  -2  -5  -2 9.90628 5.13243   2
  -2  -5  -2 10.0564  3.8591   4
  -3  -5  -2 430.198  24.270   1
  -3  -5  -2 411.942  24.958   2
  -4  -5  -2 125.950  12.611   1
  -5  -5  -2 70.2448 11.3333   1
  -6  -5  -2 147.959  15.962   1
   7  -6  -2 86.0879  9.9587   2
   6  -6  -2 68.4699  8.0265   2
   6  -6  -2 65.5542  8.9787   4
   5  -6  -2 145.052  12.177   4
   5  -6  -2 150.968  11.118   2
   4  -6  -2 174.305  13.327   4
   4  -6  -2 205.708  12.193   2
   3  -6  -2 220.244  14.118   4
   2  -6  -2 159.537  11.593   4
   2  -6  -2 168.130  10.242   2
   1  -6  -2 27.2562  4.8433   2
   1  -6  -2 23.9721  5.5001   4
   0  -6  -2 35.9317  5.1673   1
   0  -6  -2 42.3814  5.8377   4
   0  -6  -2 47.1359  6.0769   2
  -1  -6  -2 -1.9400  4.0101   4
  -1  -6  -2 1.76581 5.01188   2
  -1  -6  -2 2.60297 4.15271   1
  -2  -6  -2 227.425  16.236   2
  -2  -6  -2 192.045  14.866   1
  -2  -6  -2 223.671  12.728   4
  -3  -6  -2 96.1395 10.7767   1
  -3  -6  -2 88.9497 11.2195   2
  -4  -6  -2 155.023  14.637   1
  -5  -6  -2 44.3692 10.7189   1
   7  -7  -2 93.6860  9.9256   2
   6  -7  -2 44.2277  7.0003   2
   6  -7  -2 34.1316  8.6905   4
   5  -7  -2 159.443  12.733   4
   5  -7  -2 150.708  10.969   2
   4  -7  -2 19.7817  7.3058   4
   3  -7  -2 10.3897  6.8424   4
   2  -7  -2 23.8777  6.8447   4
   2  -7  -2 9.72596 4.46444   2
   1  -7  -2 392.693  20.391   4
   1  -7  -2 391.109  21.846   2
   0  -7  -2 -4.6701  5.3683   2
   0  -7  -2 3.10887 4.59444   1
   0  -7  -2 -0.1299  5.1044   4
  -1  -7  -2 599.342  33.576   2
  -1  -7  -2 623.950  31.527   1
  -1  -7  -2 615.339  28.131   4
  -2  -7  -2 6.35601 5.78252   1
  -2  -7  -2 0.27496 7.03081   2
  -3  -7  -2 171.763  15.293   1
  -3  -7  -2 186.117  17.883   2
  -4  -7  -2 3.44413 8.14174   1
   6  -8  -2 0.89176 7.54682   4
   5  -8  -2 124.780  12.393   4
   4  -8  -2 49.4478  9.5276   4
   3  -8  -2 177.573  14.806   4
   2  -8  -2 47.1815  6.9103   2
   2  -8  -2 54.7083  9.1000   4
   1  -8  -2 177.726  13.711   2
   1  -8  -2 174.741  13.684   4
   0  -8  -2 9.28124 6.51316   4
   0  -8  -2 13.9121  7.0297   2
  -1  -8  -2 18.8099  7.0342   4
  -1  -8  -2 46.1987  7.2410   1
  -1  -8  -2 37.8308  8.8417   2
  -2  -8  -2 101.640  12.952   2
  -2  -8  -2 102.871  10.697   1
  -3  -8  -2 0.79306 7.10118   1
  -3  -8  -2 3.39655 9.89701   2
   4  -9  -2 -0.1093  8.7519   4
   3  -9  -2 -16.319   7.913   4
   2  -9  -2 2.34163 6.14688   2
   2  -9  -2 4.59768 8.30580   4
   1  -9  -2 207.067  15.830   2
   1  -9  -2 244.986  16.393   4
   0  -9  -2 24.8578  8.4471   2
   0  -9  -2 23.5244  7.9882   4
  -1  -9  -2 101.337  12.193   2
  -2  -9   3 65.7220 11.6101   2
  -1  -9   3 61.0990 10.1900   2
   0  -9   3 72.1417  9.6840   2
   1  -9   3 -3.7601  7.2208   4
   1  -9   3 5.88697 5.90063   2
   2  -9   3 23.4605  8.6441   4
   3  -9   3 41.3174  9.3784   4
   4  -9   3 3.51906 7.77027   4
  -3  -8   3 -4.2466  8.7719   2
  -3  -8   3 4.66447 6.48764   1
  -2  -8   3 89.3876  9.3286   1
  -2  -8   3 73.6618 11.4863   2
  -1  -8   3 98.1589  9.1090   1
  -1  -8   3 83.3021 10.8081   2
   0  -8   3 1.95765 6.07544   2
   0  -8   3 -3.6678  6.0010   4
   1  -8   3 146.781  11.897   2
   1  -8   3 157.585  12.909   4
   2  -8   3 104.732  10.338   4
   3  -8   3 160.120  12.858   4
   4  -8   3 11.7262  7.1436   4
   5  -8   3 38.7192  8.5489   4
   6  -8   3 0.74020 7.48932   4
  -5  -7   3 29.0147 10.2682   1
  -4  -7   3 1.92309 7.88966   1
  -3  -7   3 249.671  18.521   1
  -3  -7   3 285.308  20.984   2
  -2  -7   3 51.0212  7.6945   1
  -2  -7   3 32.1548  8.5512   2
  -1  -7   3 314.622  17.872   1
  -1  -7   3 301.432  16.878   4
  -1  -7   3 313.217  19.782   2
   0  -7   3 172.521  10.338   1
   0  -7   3 180.036  12.151   4
   0  -7   3 152.571  12.696   2
   1  -7   3 105.349  15.063   3
   1  -7   3 95.3535  9.0943   4
   1  -7   3 84.8914  8.6557   2
   2  -7   3 59.6011  7.7584   4
   2  -7   3 61.0609 12.2498   3
   3  -7   3 141.984  11.037   4
   3  -7   3 140.859  16.913   3
   4  -7   3 15.9607  6.4836   4
   5  -7   3 294.515  17.367   4
   6  -7   3 2.77988 5.10208   2
  -6  -6   3 110.645  14.868   1
  -5  -6   3 39.0003 10.5208   1
  -4  -6   3 434.895  26.539   1
  -3  -6   3 3.30385 7.07959   2
  -3  -6   3 7.25666 6.30925   1
  -2  -6   3 33.5426  6.5894   1
  -2  -6   3 24.0473  7.1134   2
  -1  -6   3 27.3456  6.2196   2
  -1  -6   3 37.6219  5.5760   4
  -1  -6   3 33.8749  5.5845   1
   0  -6   3 30.6801  5.4011   2
   0  -6   3 23.3892  5.1972   4
   0  -6   3 39.9817  4.4585   1
   1  -6   3 495.199  23.417   4
   1  -6   3 495.419  36.332   3
   1  -6   3 506.611  24.870   2
   2  -6   3 182.801  11.989   4
   2  -6   3 177.381  17.538   3
   3  -6   3 827.788  35.125   4
   3  -6   3 770.011  53.330   3
   4  -6   3 -3.9510  4.9468   4
   4  -6   3 7.14150 7.77516   3
   5  -6   3 275.703  16.380   2
   5  -6   3 317.944  16.580   4
   6  -6   3 70.2398  7.7718   2
   7  -6   3 54.2028  8.2846   2
  -6  -5   3 122.277  14.745   1
  -5  -5   3 131.308  14.129   1
  -4  -5   3 53.6935  9.3132   1
  -3  -5   3 623.712  32.951   2
  -3  -5   3 559.673  31.537   1
  -2  -5   3 64.4758  7.4807   1
  -2  -5   3 59.5257  7.6729   2
  -1  -5   3 908.125  38.492   4
  -1  -5   3 954.233  44.282   1
  -1  -5   3 905.757  45.709   2
   0  -5   3 523.589  24.259   4
   0  -5   3 593.485  26.720   1
   0  -5   3 524.929  38.078   3
   1  -5   3 50.1188  5.4683   4
   1  -5   3 52.3663  8.8651   3
   2  -5   3 232.443  19.272   3
   2  -5   3 235.019  12.826   4
   3  -5   3 150.585  10.024   4
   3  -5   3 147.321  15.080   3
   4  -5   3 25.7486  8.1603   3
   4  -5   3 16.0196  3.4310   2
   4  -5   3 14.9827  4.8241   4
   4  -5   3 13.6381  3.6887   2
   5  -5   3 729.707  31.328   4
   5  -5   3 739.930  49.609   3
   5  -5   3 674.248  35.395   2
   6  -5   3 75.6975  8.2870   2
   7  -5   3 49.0959  8.3880   2
   8  -5   3 52.2752  9.6390   2
  -7  -4   3 11.4155  9.9203   1
  -6  -4   3 289.727  21.840   1
  -5  -4   3 247.878  18.906   1
  -4  -4   3 139.201  13.323   1
  -3  -4   3 140.930  12.099   1
  -3  -4   3 155.801  12.658   2
  -2  -4   3 86.2955  7.9915   1
  -2  -4   3 91.8048  8.1966   2
  -1  -4   3 26.3902  4.4098   2
  -1  -4   3 33.6073  3.9344   4
  -1  -4   3 30.6237  4.6078   1
   0  -4   3 139.926   8.388   1
   0  -4   3 131.382  13.053   3
   0  -4   3 137.284   8.401   4
   0  -4   3 137.412   8.195   2
   1  -4   3 2249.68  138.96   3
   1  -4   3 2261.67   90.00   4
   2  -4   3 108.098  11.616   3
   2  -4   3 92.4277  7.5267   4
   3  -4   3 2084.27  127.86   3
   3  -4   3 2029.55   82.45   4
   3  -4   3 2057.21   96.36   2
   4  -4   3 96.7360  7.5861   2
   4  -4   3 121.312  13.918   3
   4  -4   3 113.631   8.274   4
   5  -4   3 1154.07   47.44   4
   5  -4   3 1247.05   76.35   3
   5  -4   3 1161.74   53.93   1
   5  -4   3 1055.49   55.61   2
   6  -4   3 365.782  30.979   3
   6  -4   3 365.325  21.059   2
   6  -4   3 351.623  19.945   1
   7  -4   3 12.5270  6.9227   2
   7  -4   3 15.8964  6.4213   1
   8  -4   3 166.741  15.864   2
   7   3  -3 -1.9156  7.6166   1
  -7  -3   3 -0.1461  8.6173   1
   6   3  -3 386.710  24.886   1
  -6  -3   3 397.316  25.691   1
   5   3  -3 193.117  15.694   1
  -5  -3   3 223.374  16.958   1
   4   3  -3 45.4124  6.7179   1
  -4  -3   3 50.5274  7.8380   1
   3   3  -3 1016.24   49.22   1
  -3  -3   3 1038.25   51.05   2
  -3  -3   3 1018.97   49.72   1
   2   3  -3 731.080  35.643   1
  -2  -3   3 775.461  37.228   2
  -2  -3   3 722.180  36.123   1
   1   3  -3 380.767  18.164   1
  -1  -3   3 355.528  18.547   1
  -1  -3   3 354.295  25.307   3
  -1  -3   3 367.348  15.910   4
   0  -3   3 1580.42   99.03   3
   0  -3   3 1589.25   63.92   4
   0  -3   3 1637.18   73.00   1
   1  -3   3 32.6988  3.2970   4
   1  -3   3 21.5822  2.4427   1
   1  -3   3 34.4641  5.5846   3
   1  -3   3 33.4759  2.8629   1
   2  -3   3 600.157  26.573   4
   2  -3   3 661.917  29.462   1
   2  -3   3 649.903  41.942   3
   3  -3   3 72.4448  5.6132   2
   3  -3   3 74.2590  6.3218   4
   3  -3   3 80.3732 10.1427   3
   3  -3   3 80.8454  5.7927   2
   3  -3   3 83.9764  5.5719   1
   4  -3   3 522.932  24.012   1
   4  -3   3 434.615  34.712   3
   4  -3   3 483.290  20.930   4
   4  -3   3 473.420  24.347   2
   5  -3   3 9.30924 4.24351   1
   5  -3   3 6.14479 4.45591   2
   5  -3   3 -1.8097  7.9148   3
   6  -3   3 426.152  23.495   1
   6  -3   3 436.142  24.449   2
   7  -3   3  3.7312 11.0114   3
   7  -3   3 55.7859  8.4367   1
   7  -3   3 46.6334  8.4615   2
   8  -3   3 152.158  13.877   1
   8  -3   3 138.252  14.216   2
   8   2  -3 -9.4101  8.2232   1
   7   2  -3 240.943  19.246   1
   6   2  -3 61.8036  9.7250   1
  -6  -2   3 69.1194 10.7762   1
   5   2  -3 710.654  36.726   1
  -5  -2   3 691.265  37.181   1
   4   2  -3 133.223  10.988   1
  -4  -2   3 132.078  11.405   1
   3   2  -3 1522.57   72.47   1
  -3  -2   3 1563.59   74.98   2
  -3  -2   3 1583.43   72.97   1
   2   2  -3 66.5815  5.8999   1
  -2  -2   3 63.0667  5.6773   2
  -2  -2   3 60.3129  5.6986   1
   1   2  -3 126.395   7.218   1
  -1  -2   3 114.671  10.203   3
  -1  -2   3 118.242   7.624   1
   0  -2   3 4.60895 2.75010   3
   0  -2   3 3.90719 1.55870   4
   0  -2   3 3.92258 1.63395   1
   1  -2   3 3435.99  141.04   4
   1  -2   3 3752.34  218.13   3
   2  -2   3 298.045  14.146   1
   2  -2   3 247.808  20.660   3
   2  -2   3 304.275  12.660   4
   2  -2   3 302.006  14.380   2
   3  -2   3 7477.21  296.51   4
   3  -2   3 7426.37  459.78   3
   3  -2   3 7531.60  352.25   2
   3  -2   3 7858.80  341.11   1
   4  -2   3 71.2287  7.0636   2
   4  -2   3 76.4809  7.2647   1
   4  -2   3 73.3816  5.4123   4
   4  -2   3 86.0585 13.8864   3
   5  -2   3 420.238  35.609   3
   5  -2   3 395.602  22.489   1
   5  -2   3 438.738  22.955   2
   6  -2   3 16.2572  5.8797   2
   6  -2   3  5.8756 11.2452   3
   6  -2   3 7.29440 5.61394   1
   7  -2   3 22.0987  7.9249   2
   7  -2   3 24.3547  7.5280   1
   7  -2   3 18.5111 13.4721   3
   8  -2   3 50.1228 15.8659   3
   8  -2   3 42.7438  9.7668   1
   8   1  -3 365.221  25.229   1
   7   1  -3 6.34756 7.70061   1
   6   1  -3 192.508  15.486   1
  -6  -1   3 197.267  16.144   1
   5   1  -3 41.2582  6.9448   1
  -5  -1   3 39.8072  7.3102   1
   4   1  -3 48.4635  6.2037   1
  -4  -1   3 49.5867  6.6236   1
   3   1  -3 1411.59   66.10   1
  -3  -1   3 1424.93   66.37   1
   2   1  -3 1032.90   47.01   1
  -2  -1   3 982.531  47.069   1
   1   1  -3 1268.77   56.59   1
  -1  -1   3 1249.75   56.69   1
  -1  -1   3 1189.01   75.63   3
   0  -1   3 2802.08  128.88   1
   0  -1   3 2907.66  172.89   3
   1  -1   3 3115.74  189.27   3
  -2   1  -3 680.435  33.719   1
   2  -1   3 712.086  33.822   1
   2  -1   3 683.562  34.586   2
   2  -1   3 854.617  48.259   3
  -3   1  -3 1157.02   53.11   1
   3  -1   3 1146.02   53.18   1
   3  -1   3 1116.41   54.38   2
  -4   1  -3 2827.38  126.49   1
   4  -1   3 2675.57  126.44   1
   4  -1   3 2783.55  130.23   2
   5  -1   3 9.00082 4.57225   2
   5  -1   3 11.7358  4.8937   1
   6  -1   3 928.717  47.423   1
   6  -1   3 972.764  48.509   2
   7  -1   3 62.1675  9.5931   1
   7  -1   3 52.9445 17.0505   3
   8  -1   3 48.2880 17.2763   3
   8  -1   3 57.7078 10.8322   1
   8   0  -3 18.5999  9.2482   1
   7   0  -3 504.267  29.809   1
   6   0  -3 7.40768 6.06804   1
   5   0  -3 934.266  46.128   1
   5   0  -3 939.765  46.728   2
  -5   0   3 925.002  46.150   1
   4   0  -3 358.781  19.460   2
   4   0  -3 365.477  19.573   1
  -4   0   3 342.171  19.491   1
   3   0  -3 368.220  19.202   1
   3   0  -3 366.256  19.197   2
  -3   0   3 382.049  19.500   1
   2   0  -3 58.6825  4.9798   1
  -2   0   3 53.2602  4.5319   1
   1   0  -3 3486.44  157.23   1
   0   0  -3 1152.35   52.86   1
  -1   0  -3 8799.51  395.28   1
   1   0   3 8768.92  394.65   1
  -2   0  -3 28.2867  3.3596   1
   2   0   3 26.2074  3.2650   1
  -3   0  -3 2550.09  114.16   1
   3   0   3 2498.33  114.09   1
   3   0   3 2435.53  117.31   2
  -4   0  -3 199.266  12.376   1
   4   0   3 195.976  12.145   2
   4   0   3 168.108  12.009   1
  -5   0  -3 153.240  12.592   1
   5   0   3 172.824  12.733   2
   5   0   3 168.108  12.376   1
   6   0   3 16.8735  6.6218   1
   7   0   3 31.0752  8.6117   1
   8   0   3 74.6413 21.0510   3
   8   0   3 69.9508 11.6527   1
   8  -1  -3 177.405  16.765   1
   7  -1  -3 137.372  13.422   1
   6  -1  -3 96.3804 10.1588   2
   6  -1  -3 104.918  10.580   1
   5  -1  -3 35.1082  6.0628   1
   5  -1  -3 40.7097  6.0612   2
   4  -1  -3 322.677  18.118   2
   4  -1  -3 336.499  18.207   1
  -4   1   3 340.239  18.279   1
   3  -1  -3 101.608   7.568   2
   3  -1  -3 109.443   7.803   1
  -3   1   3 116.171   7.911   1
   2  -1  -3 17.0565  2.5530   1
   2  -1  -3 19.3578  2.5862   2
  -2   1   3 19.5861  2.8666   1
   1  -1  -3 7062.93  317.64   1
   0  -1  -3 57.5615  4.3002   1
  -1  -1  -3 2610.78  118.58   1
   1   1   3 2618.64  118.49   1
  -2  -1  -3 3977.10  180.72   1
   2   1   3 3997.61  180.61   1
  -3  -1  -3 1471.01   67.73   1
   3   1   3 1424.12   67.51   1
  -4  -1  -3 1182.71   56.92   1
   4   1   3 1197.49   56.92   1
  -5  -1  -3 -0.6279  4.5340   1
   5   1   3 0.96339 4.72776   1
  -6  -1  -3 594.606  32.434   1
   6   1   3 577.164  32.272   1
   7   1   3 71.6601 10.8546   1
   8   1   3 19.4767  9.7509   1
   8  -2  -3 51.9401 10.1092   1
   7  -2  -3 346.312  21.941   2
   7  -2  -3 305.539  21.071   1
   6  -2  -3 13.0728  6.1950   1
   6  -2  -3 12.2547  6.2645   2
   5  -2  -3 993.405  45.841   2
   5  -2  -3 835.186  60.556   3
   5  -2  -3 922.088  44.765   1
   4  -2  -3 1331.01   62.40   1
   4  -2  -3 1356.24   83.89   3
   4  -2  -3 1317.75   64.06   2
   3  -2  -3 54.7951  4.8550   1
   3  -2  -3 53.0080  6.3555   3
   3  -2  -3 52.5752  4.5925   2
   2  -2  -3 1854.20   82.95   1
   2  -2  -3 1791.54   85.72   2
   1  -2  -3 51.8733  4.5204   1
   1  -2  -3 57.9601  4.1236   2
   0  -2  -3 26.6202  2.8614   1
   0  -2  -3 26.0553  2.8992   2
  -1  -2  -3 1404.31   55.71   4
  -1  -2  -3 1393.97   66.66   2
  -1  -2  -3 1379.34   64.66   1
   1   2   3 1433.23   64.52   1
  -2  -2  -3 957.017  46.629   2
  -2  -2  -3 937.420  45.393   1
   2   2   3 973.585  45.209   1
  -3  -2  -3 317.692  18.517   2
  -3  -2  -3 320.471  18.225   1
   3   2   3 330.777  18.052   1
  -4  -2  -3 524.890  27.480   1
   4   2   3 501.423  27.123   1
  -5  -2  -3 3.19549 5.29973   1
   5   2   3 -1.0571  5.1436   1
  -6  -2  -3 31.7595  8.1662   1
   6   2   3 35.3650  8.1851   1
   7   2   3 -6.2599  7.4647   1
   8   2   3 65.6372 13.0030   1
   8  -3  -3 79.4357 11.7167   2
   8  -3  -3 82.0709 10.9336   1
   7  -3  -3 258.557  18.096   2
   7  -3  -3 237.128  17.107   1
   6  -3  -3 25.9810  6.5801   2
   6  -3  -3 25.6559  6.4548   1
   5  -3  -3 50.1005  6.2366   1
   5  -3  -3 46.2528  6.2900   2
   5  -3  -3 54.9677  6.0287   4
   4  -3  -3 15.8037  4.1741   4
   4  -3  -3 18.1530  3.9223   2
   4  -3  -3 15.9275  3.8501   1
   3  -3  -3 1813.43   81.60   1
   3  -3  -3 1793.30  108.73   3
   3  -3  -3 1743.78   84.24   2
   2  -3  -3 23.7410  2.8300   1
   2  -3  -3 29.3692  4.0599   3
   2  -3  -3 21.5477  3.4940   2
   1  -3  -3 5633.16  265.55   2
   1  -3  -3 5780.62  257.45   1
   1  -3  -3 5707.83  224.46   4
   0  -3  -3 198.307  10.892   1
   0  -3  -3 200.191  11.273   2
   0  -3  -3 196.911   9.952   4
  -1  -3  -3 3173.23  150.08   2
  -1  -3  -3 3199.31  126.08   4
  -1  -3  -3 3154.57  145.36   1
   1   3   3 3257.25  145.13   1
  -2  -3  -3 64.3786  6.5052   1
  -2  -3  -3 73.3483  5.2782   4
  -2  -3  -3 67.8781  6.5034   2
   2   3   3 70.4946  6.3977   1
  -3  -3  -3 458.518  25.675   1
  -3  -3  -3 492.309  26.446   2
   3   3   3 503.637  25.533   1
  -4  -3  -3 738.923  37.280   1
   4   3   3 705.493  36.808   1
  -5  -3  -3 111.043  11.238   1
   5   3   3 101.507  10.756   1
  -6  -3  -3 125.925  13.351   1
   6   3   3 121.264  13.075   1
  -7  -3  -3 36.1387 10.0753   1
   8  -4  -3 40.5572  8.4909   1
   8  -4  -3 49.0517 10.1327   2
   7  -4  -3 207.915  16.528   2
   7  -4  -3 203.487  14.526   1
   6  -4  -3 235.815  15.210   1
   6  -4  -3 254.697  14.939   4
   6  -4  -3 245.284  16.193   2
   5  -4  -3 85.2112  8.1728   4
   5  -4  -3 92.0174  8.2089   2
   5  -4  -3 105.849   8.504   1
   4  -4  -3 454.320  21.462   4
   4  -4  -3 461.848  22.275   1
   4  -4  -3 432.986  23.156   2
   3  -4  -3 240.599  14.924   2
   3  -4  -3 310.761  14.260   1
   3  -4  -3 272.109  14.627   4
   2  -4  -3 39.0557  4.9978   4
   2  -4  -3 44.8324  6.0754   3
   2  -4  -3 38.6133  3.8251   2
   2  -4  -3 37.1338  3.4327   1
   1  -4  -3 6.26198 3.53968   4
   1  -4  -3 11.3704  2.9844   2
   1  -4  -3 12.1464  3.5333   1
   0  -4  -3 1571.89   63.78   4
   0  -4  -3 1591.10   72.76   1
   0  -4  -3 1573.70   75.14   2
  -1  -4  -3 2.95851 3.43422   1
  -1  -4  -3 -0.1740  2.7256   4
  -1  -4  -3 -0.7016  3.2180   2
  -2  -4  -3 1306.29   51.38   4
  -2  -4  -3 1284.09   62.20   2
  -2  -4  -3 1219.30   60.35   1
  -3  -4  -3 83.8593  8.7225   2
  -3  -4  -3 70.6073  8.1751   1
  -4  -4  -3 508.092  28.522   1
  -5  -4  -3 41.6297  8.8961   1
  -6  -4  -3 0.11803 7.52594   1
  -7  -4  -3 -8.2753  8.3493   1
   8  -5  -3 7.33437 8.21949   2
   7  -5  -3 139.366  13.621   2
   6  -5  -3 6.90331 5.60864   2
   6  -5  -3 10.1987  4.6458   1
   6  -5  -3 19.9890  6.6347   4
   5  -5  -3 7.62693 3.68755   1
   5  -5  -3 5.16383 5.50398   4
   5  -5  -3 2.27300 4.79557   2
   4  -5  -3 33.8550  6.3100   4
   4  -5  -3 34.0294  5.0932   2
   3  -5  -3 937.636  39.325   4
   3  -5  -3 879.728  44.151   2
   2  -5  -3 17.5944  2.6169   1
   2  -5  -3 25.2509  3.6142   2
   2  -5  -3 15.4042  4.7956   4
   1  -5  -3 1931.83   84.62   1
   1  -5  -3 1814.25   87.02   2
   1  -5  -3 1758.08   74.53   4
   0  -5  -3 9.34075 4.03571   2
   0  -5  -3 5.92354 3.48936   1
   0  -5  -3 7.29831 3.81556   4
  -1  -5  -3 695.581  35.015   1
  -1  -5  -3 705.223  30.347   4
  -1  -5  -3 721.963  36.231   2
  -2  -5  -3 25.0077  5.9192   2
  -2  -5  -3 13.1752  5.4205   1
  -2  -5  -3 22.7639  4.3419   4
  -3  -5  -3 2.41831 5.41416   1
  -3  -5  -3 3.01934 6.00786   2
  -4  -5  -3 172.761  15.199   1
  -5  -5  -3 -2.4829  7.4028   1
  -6  -5  -3 196.059  18.553   1
   7  -6  -3 55.2415  8.9831   2
   6  -6  -3 46.7419  8.1951   4
   6  -6  -3 37.4526  6.8599   2
   5  -6  -3 196.145  14.505   4
   5  -6  -3 197.898  13.654   2
   4  -6  -3 130.314   9.982   2
   4  -6  -3 113.634  10.297   4
   3  -6  -3 364.942  20.033   2
   3  -6  -3 326.914  18.716   4
   2  -6  -3 79.7870  8.1033   4
   2  -6  -3 66.7697  6.1702   2
   1  -6  -3 313.408  17.935   1
   1  -6  -3 353.035  17.978   4
   1  -6  -3 386.308  19.485   2
   0  -6  -3 486.079  27.454   2
   0  -6  -3 545.760  26.438   1
   0  -6  -3 510.807  23.911   4
  -1  -6  -3 14.4128  5.0291   1
  -1  -6  -3 9.77196 4.64384   4
  -1  -6  -3 14.7323  5.8509   2
  -2  -6  -3 572.096  31.234   1
  -2  -6  -3 607.137  32.910   2
  -3  -6  -3 42.7055  9.2761   2
  -3  -6  -3 32.0621  8.1809   1
  -4  -6  -3 131.882  13.686   1
  -5  -6  -3 15.2151  9.0900   1
   7  -7  -3 28.2648  7.6193   2
   6  -7  -3 56.4448  9.5524   4
   6  -7  -3 39.3689  7.0476   2
   5  -7  -3 -0.7894  5.1408   2
   5  -7  -3 -3.7133  6.9845   4
   4  -7  -3 7.25244 4.73930   2
   4  -7  -3 -3.6260  6.6694   4
   3  -7  -3 365.106  20.888   2
   3  -7  -3 337.518  19.983   4
   2  -7  -3 6.89482 4.81679   2
   2  -7  -3 9.45189 6.61077   4
   1  -7  -3 240.151  15.486   4
   1  -7  -3 256.990  16.036   2
   0  -7  -3 177.453  14.174   2
   0  -7  -3 190.607  13.545   1
   0  -7  -3 170.143  12.468   4
  -1  -7  -3 133.656  11.091   4
  -1  -7  -3 124.016  11.462   1
  -1  -7  -3 146.758  13.648   2
  -2  -7  -3 3.47366 7.41901   2
  -2  -7  -3 0.90982 5.84648   1
  -3  -7  -3 -0.0303  8.5993   2
  -3  -7  -3 6.98705 7.04692   1
  -4  -7  -3 27.0530  9.1606   1
   6  -8  -3 9.16891 8.23027   4
   5  -8  -3 217.629  17.007   4
   4  -8  -3 20.9745  8.6804   4
   3  -8  -3 374.085  21.727   4
   3  -8  -3 355.229  21.149   2
   2  -8  -3 49.7759  7.3516   2
   2  -8  -3 46.6680  9.0892   4
   1  -8  -3 117.746  11.027   4
   1  -8  -3 125.285  11.822   2
   0  -8  -3 192.638  15.764   2
   0  -8  -3 210.230  14.355   4
  -1  -8  -3 -0.7854  6.3543   4
  -1  -8  -3 -1.9296  7.5176   2
  -1  -8  -3 14.9035  6.4761   1
  -2  -8  -3 210.121  18.602   2
  -2  -8  -3 226.002  16.446   1
  -3  -8  -3 28.4802 10.8516   2
  -3  -8  -3 32.2517  8.5972   1
   4  -9  -3 -0.6873  9.2635   4
   3  -9  -3 2.20409 9.07458   4
   2  -9  -3 107.203  12.035   4
   2  -9  -3 80.4663  9.9845   2
   1  -9  -3 94.5967 10.4762   2
   1  -9  -3 101.709  11.336   4
   0  -9  -3 80.9860  9.9427   4
   0  -9  -3 80.2263 10.7068   2
  -1  -9  -3 14.0398  8.6271   2
  -2  -9   4 46.1659 10.6570   2
  -1  -9   4 26.0379  8.8112   2
   0  -9   4 6.34301 7.11093   2
   1  -9   4 9.84629 6.09940   2
   1  -9   4 4.64349 7.66523   4
   2  -9   4 5.00172 7.89620   4
   3  -9   4 122.901  12.384   4
   4  -9   4 21.5159  8.4281   4
  -3  -8   4 0.27759 6.51917   1
  -3  -8   4 -4.7639  8.8583   2
  -2  -8   4 5.42206 5.61553   1
  -2  -8   4 -2.6469  7.7353   2
  -1  -8   4 242.302  17.915   2
   0  -8   4 13.3267  6.5070   2
   0  -8   4 7.76264 6.54242   4
   1  -8   4 365.508  20.903   2
   1  -8   4 377.607  20.396   4
   2  -8   4  3.5404 10.0271   3
   2  -8   4 0.73295 6.59212   4
   3  -8   4 323.349  18.741   4
   3  -8   4 314.188  28.298   3
   4  -8   4 65.4140  9.2794   4
   5  -8   4 82.6515 10.0558   4
  -5  -7   4 140.565  15.489   1
  -4  -7   4 32.6260  9.3631   1
  -3  -7   4 285.017  20.072   1
  -3  -7   4 317.085  22.409   2
  -2  -7   4 48.7645  9.3466   2
  -2  -7   4 52.5786  7.8489   1
  -1  -7   4 74.5650  7.5648   1
  -1  -7   4 67.7587  8.8958   2
   0  -7   4 105.486   9.775   2
   0  -7   4 131.436   8.690   1
   0  -7   4 134.508  10.034   4
   1  -7   4 8.24262 5.80076   4
   1  -7   4 0.94293 4.35426   2
   1  -7   4 -1.6048  8.7505   3
   2  -7   4 134.673  16.751   3
   2  -7   4 127.380  10.562   4
   3  -7   4 169.602  12.827   4
   3  -7   4 155.459  18.187   3
   4  -7   4 92.4499 14.2252   3
   4  -7   4 99.7701  9.6370   4
   5  -7   4 69.1934  8.8928   4
   6  -7   4 121.380  10.349   2
   7  -7   4 -0.7587  6.0666   2
  -6  -6   4 32.2390 11.2036   1
  -5  -6   4 88.1405 12.7623   1
  -4  -6   4 68.2480 10.6780   1
  -3  -6   4 15.5175  7.7328   2
  -3  -6   4 22.0909  7.2286   1
  -2  -6   4 56.9540  8.4199   2
  -2  -6   4 57.8619  7.8559   1
  -1  -6   4 481.301  26.567   2
  -1  -6   4 471.990  25.098   1
  -1  -6   4 500.810  22.620   4
   0  -6   4 1.63972 4.36409   2
   0  -6   4 4.43149 7.74701   3
   0  -6   4 9.40311 4.66524   4
   0  -6   4 7.10296 3.40166   1
   1  -6   4 1600.92   74.34   2
   1  -6   4 1607.85  100.84   3
   1  -6   4 1515.91   64.73   4
   2  -6   4 1.13352 4.55298   4
   2  -6   4 3.15753 6.76256   3
   3  -6   4 760.105  33.072   4
   3  -6   4 734.946  50.789   3
   4  -6   4 236.448  22.185   3
   4  -6   4 251.029  14.537   4
   5  -6   4 67.3334 12.7742   3
   5  -6   4 57.6831  7.5193   4
   5  -6   4 47.2299  6.0726   2
   6  -6   4 160.841  12.249   2
   7  -6   4 13.0320  6.8165   2
  -6  -5   4 20.9585  9.7512   1
  -5  -5   4 269.952  20.562   1
  -4  -5   4 51.2168  9.3766   1
  -3  -5   4 357.529  22.261   2
  -3  -5   4 347.587  21.413   1
  -2  -5   4 293.686  18.052   1
  -2  -5   4 323.067  19.050   2
  -1  -5   4 339.594  16.661   4
  -1  -5   4 343.291  19.528   2
  -1  -5   4 354.395  18.845   1
   0  -5   4 10.3628  4.0046   4
   0  -5   4 15.4378  3.5698   1
   0  -5   4 16.1174  7.2783   3
   1  -5   4 -0.2377  1.9554   2
   1  -5   4 6.03570 6.02154   3
   1  -5   4 2.31105 3.63639   4
   2  -5   4 594.038  40.371   3
   2  -5   4 561.640  25.593   4
   3  -5   4 68.8870 10.4931   3
   3  -5   4 70.6693  6.4282   4
   4  -5   4 1230.83   60.08   2
   4  -5   4 1282.81   82.00   3
   4  -5   4 1284.24   52.33   4
   5  -5   4 35.1614  5.4775   2
   5  -5   4 47.1842 11.3998   3
   5  -5   4 34.7465  6.1177   4
   6  -5   4 233.616  15.650   2
   6  -5   4 256.501  24.972   3
   7  -5   4 1.40409 6.34854   2
   8  -5   4 -1.5322  7.2269   2
  -7  -4   4 164.066  17.521   1
  -6  -4   4 122.321  14.394   1
  -5  -4   4 319.684  22.165   1
  -4  -4   4 27.1878  7.5071   1
  -3  -4   4 16.8865  5.7251   2
  -3  -4   4 13.8290  5.6388   1
  -2  -4   4 121.163  10.680   2
  -2  -4   4 134.253  10.357   1
  -1  -4   4 1202.04   78.36   3
  -1  -4   4 1265.36   57.77   1
   0  -4   4 -2.7291  2.7314   4
   0  -4   4 -1.1987  2.5444   1
   0  -4   4 0.81623 2.16561   2
   0  -4   4 -1.1995  4.5527   3
   1  -4   4 4158.10  161.42   4
   1  -4   4 4079.32  249.18   3
   1  -4   4 4329.30  184.18   1
   1  -4   4 4241.43  190.16   2
   1  -4   4 3627.45  184.29   1
   2  -4   4 285.880  22.178   3
   2  -4   4 285.875  13.957   4
   3  -4   4 581.930  29.273   2
   3  -4   4 603.815  41.652   3
   3  -4   4 604.870  26.151   4
   3  -4   4 640.791  29.757   2
   4  -4   4 15.6031  3.9645   4
   4  -4   4 6.28461 7.60717   3
   4  -4   4 12.2023  3.4961   2
   5  -4   4 4.58989 4.32189   2
   5  -4   4 -1.2261  3.9538   1
   5  -4   4 5.38764 8.73914   3
   6  -4   4 80.0275  8.3364   1
   6  -4   4 76.8297  8.4371   2
   6  -4   4 80.1330 15.8059   3
   7  -4   4 77.7174 16.9362   3
   7  -4   4 84.4487  9.9327   2
   8  -4   4 66.0951 10.7445   2
   7   3  -4 13.6288  8.7004   1
  -7  -3   4 9.34420 9.24237   1
   6   3  -4 7.42904 7.35230   1
  -6  -3   4 8.62194 8.09761   1
   5   3  -4 271.296  18.429   1
  -5  -3   4 257.461  19.049   1
   4   3  -4 162.080  12.584   1
  -4  -3   4 177.237  13.923   1
   3   3  -4 998.600  48.830   1
  -3  -3   4 989.989  49.435   1
  -3  -3   4 1064.88   50.92   2
   2   3  -4 498.028  25.120   1
  -2  -3   4 528.162  26.414   2
  -2  -3   4 486.321  25.676   1
   1   3  -4 1923.23   85.19   1
  -1  -3   4 1768.52  115.03   3
  -1  -3   4 1896.39   85.49   1
   0  -3   4 219.609  11.386   1
   0  -3   4 214.686  16.377   3
   0  -3   4 205.051  10.136   4
   1  -3   4 3366.41  202.52   3
   1  -3   4 3317.24  130.93   4
   1  -3   4 3277.29  149.69   1
   2  -3   4 3289.07  134.34   4
   2  -3   4 3364.39  159.03   2
   2  -3   4 3518.71  208.37   3
   2  -3   4 3459.76  158.71   2
   3  -3   4 309.871  15.689   2
   3  -3   4 292.364  15.351   2
   3  -3   4 289.927  23.358   3
   3  -3   4 296.341  13.672   4
   4  -3   4 2105.43   94.44   1
   4  -3   4 1994.38   97.26   2
   4  -3   4 2079.51   82.02   4
   5  -3   4 32.0925  5.4540   1
   5  -3   4 25.8265  5.1841   2
   5  -3   4 25.7343 10.3459   3
   6  -3   4 154.322  12.436   2
   6  -3   4 154.378  20.103   3
   6  -3   4 143.547  11.922   1
   7  -3   4 51.4382  8.5329   1
   7  -3   4 54.3595 14.8838   3
   7  -3   4 58.3948  9.2117   2
   8  -3   4 8.90313 7.30487   1
   8  -3   4 6.62464 8.31219   2
   8   2  -4 2.59244 8.89328   1
   7   2  -4 418.071  26.953   1
   6   2  -4 173.880  15.278   1
  -6  -2   4 174.017  15.809   1
   5   2  -4 184.746  14.542   1
  -5  -2   4 204.667  15.654   1
   4   2  -4 166.669  12.130   1
  -4  -2   4 170.448  12.895   1
   3   2  -4 147.923  10.596   1
  -3  -2   4 163.964  11.522   1
  -3  -2   4 149.903  11.275   2
   2   2  -4 22.8625  3.5181   1
  -2  -2   4 24.9034  4.1546   1
  -2  -2   4 25.0889  4.0955   2
   1   2  -4 5818.50  257.43   1
  -1  -2   4 5563.24  345.37   3
  -1  -2   4 5756.98  257.66   1
   0  -2   4 4.47117 1.81473   1
   0  -2   4 5.97659 3.24342   3
   1  -2   4 2943.82  117.19   4
   1  -2   4 3265.23  181.89   3
   1  -2   4 2615.49  134.65   1
   1  -2   4 3104.50  138.82   2
   2  -2   4 1692.58   66.73   4
   2  -2   4 1675.19   78.96   2
   3  -2   4 281.244  15.015   1
   3  -2   4 264.976  15.054   2
   3  -2   4 294.018  12.619   4
   3  -2   4 323.003  24.254   3
   4  -2   4 385.213  31.201   3
   4  -2   4 345.612  18.866   1
   4  -2   4 358.624  19.224   2
   5  -2   4 107.668  17.912   3
   5  -2   4 116.788   9.572   1
   5  -2   4 103.792   9.412   2
   6  -2   4 24.2198  6.5155   2
   6  -2   4 29.3620  6.6899   1
   6  -2   4 36.1973 14.4653   3
   7  -2   4 51.5670 16.4967   3
   7  -2   4 63.9727  9.3571   1
   7  -2   4 57.8229  9.6270   2
   8  -2   4 183.214  16.165   1
   8  -2   4 198.930  25.392   3
   8   1  -4 15.8733  9.3295   1
   7   1  -4 1.94287 7.52830   1
   6   1  -4 21.1817  7.2171   1
  -6  -1   4 17.5545  7.6860   1
   5   1  -4 86.6260  8.9909   1
  -5  -1   4 81.6843  9.4597   1
   4   1  -4 234.600  14.439   1
  -4  -1   4 224.416  14.855   1
   3   1  -4 3856.14  175.82   1
  -3  -1   4 3877.94  176.04   1
   2   1  -4 30.7132  3.6176   1
  -2  -1   4 24.4002  3.6645   1
   1   1  -4 2525.66  116.31   1
  -1  -1   4 2621.14  155.77   3
  -1  -1   4 2555.21  116.43   1
   0  -1   4 4315.21  259.63   3
   0  -1   4 4273.26  193.77   1
   1  -1   4 2434.59  148.67   3
  -2   1  -4 4497.71  203.54   1
   2  -1   4 4481.31  203.59   1
   2  -1   4 4450.32  210.20   2
   2  -1   4 4622.52  275.30   3
  -3   1  -4 42.7494  4.4132   1
   3  -1   4 29.4870  4.1773   1
   3  -1   4 33.1542  4.0371   2
  -4   1  -4 1284.92   60.32   1
   4  -1   4 1257.97   60.35   1
   4  -1   4 1300.01   61.81   2
   5  -1   4 254.360  15.893   1
   5  -1   4 260.815  15.926   2
   6  -1   4 108.312  10.575   2
   6  -1   4 113.210  10.610   1
   7  -1   4 188.705  25.927   3
   7  -1   4 193.539  15.826   1
   8  -1   4 10.8857 14.7932   3
   8  -1   4 -2.5004  7.8016   1
   8   0  -4 16.5848  9.0972   1
   7   0  -4 376.231  24.408   1
   6   0  -4 133.456  12.841   1
   5   0  -4 20.9333  5.8656   1
   5   0  -4 23.8433  5.8509   2
  -5   0   4 25.0375  6.2311   1
   4   0  -4 689.148  34.359   1
   4   0  -4 671.569  34.632   2
  -4   0   4 716.011  34.673   1
   3   0  -4 41.8519  4.2532   2
   3   0  -4 35.5509  4.4907   1
  -3   0   4 37.2086  4.8356   1
   2   0  -4 392.929  19.393   1
  -2   0   4 385.108  19.472   1
   1   0  -4 5.09826 1.72883   1
  -1   0   4 3.16808 1.94010   1
   0   0  -4 4482.49  193.68   1
   0   0   4 4093.25  193.50   1
  -1   0  -4 35.9799  3.1838   1
  -2   0  -4 2730.23  123.51   1
   2   0   4 2700.93  123.46   1
  -3   0  -4 166.653  10.577   1
   3   0   4 164.025  10.291   2
   3   0   4 156.604  10.482   1
  -4   0  -4 435.977  23.364   1
   4   0   4 439.782  23.427   2
   4   0   4 442.749  23.374   1
  -5   0  -4 112.894  10.619   1
   5   0   4 101.781   9.811   1
   6   0   4 188.207  14.600   1
   7   0   4 1.02951 6.94197   1
   8   0   4 248.195  31.103   3
   8   0   4 236.822  19.733   1
   8  -1  -4 6.31968 8.40330   1
   7  -1  -4 93.3749 11.3895   1
   6  -1  -4 4.13145 5.90466   2
   6  -1  -4 0.33173 5.69192   1
   5  -1  -4 915.397  45.625   2
   5  -1  -4 907.094  44.861   1
   4  -1  -4 21.5005  4.2329   2
   4  -1  -4 23.0160  4.5299   1
  -4   1   4 21.7689  4.7238   1
   3  -1  -4 4057.91  192.56   2
   3  -1  -4 4105.85  186.69   1
  -3   1   4 4194.09  186.69   1
   2  -1  -4 1047.98   49.30   1
   2  -1  -4 1082.61   50.82   2
  -2   1   4 1065.78   49.33   1
   1  -1  -4 8635.30  392.08   1
  -1   1   4 8800.01  392.01   1
   0  -1  -4 23.7315  2.9385   1
  -1  -1  -4 1357.23   63.89   1
   1   1   4 1422.90   63.85   1
  -2  -1  -4 2287.16  104.22   1
   2   1   4 2262.98  104.04   1
  -3  -1  -4 33.7619  4.9258   1
   3   1   4 30.9262  4.7636   1
  -4  -1  -4 183.127  12.632   1
   4   1   4 177.729  12.302   1
  -5  -1  -4 537.014  29.520   1
   5   1   4 560.497  29.401   1
   6   1   4 198.333  15.341   1
   7   1   4 -13.273   6.597   1
   8   1   4 6.61573 9.30614   1
   8  -2  -4 40.3711  9.7460   1
   7  -2  -4 93.9228 11.1367   2
   7  -2  -4 96.9010 11.2978   1
   6  -2  -4 563.567  30.758   1
   6  -2  -4 586.715  31.397   2
   5  -2  -4 550.634  29.390   1
   5  -2  -4 591.003  30.003   2
   4  -2  -4 28.7447  4.6659   1
   4  -2  -4 21.5686  4.4395   2
   3  -2  -4 342.272  17.759   1
   3  -2  -4 345.212  18.168   2
   2  -2  -4 1786.42   98.98   2
   2  -2  -4 2434.87   96.11   1
   1  -2  -4 395.233  19.510   1
   0  -2  -4 4747.90  212.07   1
   0  -2  -4 4646.51  218.95   2
  -1  -2  -4 9.30476 2.74632   1
  -1  -2  -4 5.50496 1.89097   4
  -1  -2  -4 4.35126 2.74618   2
   1   2   4 6.57307 2.46350   1
  -2  -2  -4 3035.91  120.76   4
  -2  -2  -4 3071.81  144.89   2
  -2  -2  -4 3073.55  140.51   1
   2   2   4 3125.74  140.30   1
  -3  -2  -4 27.6027  5.0731   1
   3   2   4 34.9123  5.1572   1
  -4  -2  -4 64.5254  7.5464   1
   4   2   4 63.9453  7.3558   1
  -5  -2  -4 10.0094  5.9352   1
   5   2   4 11.1398  5.7524   1
  -6  -2  -4 122.205  12.543   1
   6   2   4 110.757  12.024   1
   7   2   4 7.33730 8.43386   1
   8  -3  -4 -3.9222  8.1531   2
   8  -3  -4 2.33281 7.53355   1
   7  -3  -4 3.23079 6.41622   1
   7  -3  -4 5.60381 6.86379   2
   6  -3  -4 12.0637  5.8984   2
   6  -3  -4 13.4199  5.9408   1
   5  -3  -4 871.650  43.239   2
   5  -3  -4 824.822  36.966   4
   5  -3  -4 890.631  42.148   1
   4  -3  -4 10.3482  3.7610   2
   4  -3  -4 11.8045  3.9784   1
   3  -3  -4 3101.03  148.55   2
   3  -3  -4 3230.44  143.76   1
   2  -3  -4 186.780   9.746   1
   2  -3  -4 148.388  10.625   2
   1  -3  -4 1799.79   79.89   1
   1  -3  -4 1675.60   81.74   2
   0  -3  -4 6.90483 2.75007   4
   0  -3  -4 3.88105 2.60069   1
   0  -3  -4 4.49601 2.83706   2
  -1  -3  -4 70.0479  5.6164   4
  -1  -3  -4 71.9637  6.3619   2
  -1  -3  -4 75.0380  7.0292   1
   1   3   4 70.5052  6.8137   1
  -2  -3  -4 6.56958 3.76037   1
  -2  -3  -4 4.08710 3.80818   2
  -2  -3  -4 7.95041 2.46208   4
   2   3   4 8.30695 3.65212   1
  -3  -3  -4 204.922  13.851   2
  -3  -3  -4 176.283  13.247   1
   3   3   4 204.059  13.228   1
  -4  -3  -4 676.269  34.491   1
   4   3   4 630.208  33.822   1
  -5  -3  -4 130.074  12.261   1
   5   3   4 111.848  11.577   1
  -6  -3  -4 188.001  16.686   1
   6   3   4 189.874  16.650   1
  -7  -3  -4 7.18624 8.48599   1
   8  -4  -4 36.3862  8.3090   1
   8  -4  -4 33.5660  9.6190   2
   7  -4  -4 225.315  15.528   1
   7  -4  -4 214.012  17.215   2
   6  -4  -4 33.1176  6.4517   1
   6  -4  -4 36.3297  6.9698   2
   6  -4  -4 21.2193  6.3991   4
   5  -4  -4 371.076  21.499   2
   5  -4  -4 383.373  19.969   1
   5  -4  -4 357.885  19.106   4
   4  -4  -4 160.746  10.180   1
   4  -4  -4 154.136  10.807   2
   4  -4  -4 163.127  11.272   4
   3  -4  -4 694.100  34.552   2
   2  -4  -4 1996.32   95.36   2
   2  -4  -4 2006.34   81.74   4
   2  -4  -4 2058.23   92.18   1
   1  -4  -4 179.265  11.002   4
   1  -4  -4 207.121  11.879   1
   1  -4  -4 185.312  11.251   2
   0  -4  -4 2606.00  118.65   1
   0  -4  -4 2624.63  122.57   2
   0  -4  -4 2558.49  103.52   4
  -1  -4  -4 122.444   9.468   1
  -1  -4  -4 122.522   8.046   4
  -1  -4  -4 120.464   9.803   2
  -2  -4  -4 560.854  30.334   2
  -2  -4  -4 571.968  29.598   1
  -2  -4  -4 581.912  24.421   4
  -3  -4  -4 157.500  12.982   2
  -3  -4  -4 146.980  12.275   1
  -4  -4  -4 17.9261  6.7151   1
  -5  -4  -4 7.32696 6.94331   1
  -6  -4  -4 51.0641 10.5765   1
  -7  -4  -4 36.0648 10.6997   1
   8  -5  -4 84.9440 11.6164   2
   7  -5  -4 10.1674  7.3535   2
   6  -5  -4 5.99958 6.44641   4
   6  -5  -4 4.61177 4.69259   1
   6  -5  -4 0.01504 5.69025   2
   5  -5  -4 138.854  11.680   2
   5  -5  -4 128.748  10.745   4
   5  -5  -4 156.160   9.785   1
   4  -5  -4 16.8023  4.7784   2
   4  -5  -4 9.67842 5.66861   4
   4  -5  -4 15.0207  3.3470   1
   3  -5  -4 368.446  19.785   4
   3  -5  -4 413.517  19.114   1
   3  -5  -4 377.624  21.128   2
   2  -5  -4 658.514  30.821   1
   2  -5  -4 641.803  29.277   4
   2  -5  -4 649.370  32.382   2
   1  -5  -4 1.06967 3.51591   2
   1  -5  -4 4.45396 3.66136   1
   1  -5  -4 -4.8921  3.7992   4
   0  -5  -4 254.050  14.284   1
   0  -5  -4 221.363  14.788   2
   0  -5  -4 241.966  13.132   4
  -1  -5  -4 3.62140 3.77055   4
  -1  -5  -4 1.44101 4.54829   2
  -1  -5  -4 7.25753 4.33249   1
  -2  -5  -4 39.9607  7.1315   2
  -2  -5  -4 40.6063  6.8367   1
  -3  -5  -4 95.0222 10.5762   2
  -3  -5  -4 87.2434  9.9449   1
  -4  -5  -4 372.087  23.674   1
  -5  -5  -4 9.74875 7.94757   1
  -6  -5  -4 199.338  18.289   1
   6  -6  -4 6.54272 6.03345   2
   6  -6  -4 7.83826 7.15139   4
   5  -6  -4 590.815  28.741   4
   4  -6  -4 81.3031  7.7284   2
   4  -6  -4 70.1173  8.9769   4
   3  -6  -4 500.121  25.486   4
   3  -6  -4 529.582  27.758   2
   2  -6  -4 386.091  19.941   4
   2  -6  -4 376.043  20.719   2
   1  -6  -4 20.3300  4.5013   1
   1  -6  -4 15.9675  5.5305   4
   1  -6  -4 29.9608  5.4995   2
   0  -6  -4 560.194  27.638   1
   0  -6  -4 502.619  24.467   4
   0  -6  -4 515.267  28.352   2
  -1  -6  -4 106.908  10.469   2
  -1  -6  -4 117.880  10.340   1
  -1  -6  -4 117.588   9.692   4
  -2  -6  -4 210.883  15.779   1
  -2  -6  -4 242.817  17.397   2
  -3  -6  -4 10.9445  8.2374   2
  -3  -6  -4 19.6519  7.2870   1
  -4  -6  -4 47.1710  9.8726   1
  -5  -6  -4 7.70261 8.85897   1
   6  -7  -4 3.95599 7.87065   4
   6  -7  -4 -0.8206  5.7323   2
   5  -7  -4 -4.6824  6.9587   4
   5  -7  -4 -1.8918  5.4257   2
   4  -7  -4 444.741  24.312   4
   4  -7  -4 449.984  24.440   2
   3  -7  -4 54.7966  8.0763   2
   3  -7  -4 65.2277  9.1000   4
   2  -7  -4 289.822  17.939   4
   2  -7  -4 302.944  18.058   2
   1  -7  -4 8.08124 5.66870   2
   1  -7  -4 0.85259 5.92766   4
   0  -7  -4 233.893  15.890   2
   0  -7  -4 219.713  13.988   4
   0  -7  -4 185.872  14.926   1
  -1  -7  -4 0.63601 5.30093   1
  -1  -7  -4 1.98627 6.57118   2
  -1  -7  -4 2.70994 5.34295   4
  -2  -7  -4 78.0903  9.5962   1
  -2  -7  -4 62.1128 10.5424   2
  -3  -7  -4 25.2071  9.8727   2
  -3  -7  -4 23.7062  8.1199   1
  -4  -7  -4 102.400  12.794   1
   5  -8  -4 173.116  14.832   4
   4  -8  -4 -7.0291  7.8675   4
   4  -8  -4 6.10030 5.23965   2
   3  -8  -4 58.1276  8.3380   2
   3  -8  -4 51.6451 10.3768   4
   2  -8  -4 100.426  10.187   2
   2  -8  -4 107.964  11.684   4
   1  -8  -4 8.22738 7.03848   4
   1  -8  -4 9.42251 6.56268   2
   0  -8  -4 177.914  13.590   4
   0  -8  -4 180.865  15.191   2
  -1  -8  -4 51.6518  8.6602   1
  -1  -8  -4 42.8268  9.8735   2
  -2  -8  -4 173.333  16.403   2
  -2  -8  -4 179.493  14.962   1
  -3  -8  -4 2.53852 7.37958   1
  -3  -8  -4  8.2301 10.2433   2
   3  -9  -4 -4.0444  8.7396   4
   3  -9  -4 1.37178 6.40554   2
   2  -9  -4 164.436  15.486   2
   2  -9  -4 206.776  16.528   4
   1  -9  -4 17.2405  8.3335   4
   1  -9  -4 12.6561  7.6218   2
   0  -9  -4 38.5470  8.7081   4
   0  -9  -4 20.4595  8.4156   2
  -2  -9   5 1.35958 8.65003   2
  -1  -9   5 -1.9120  7.3741   2
   0  -9   5 51.4640  8.8161   2
   1  -9   5 3.85029 5.85928   2
   2  -9   5 103.069  11.639   4
   3  -9   5 44.7428  9.5233   4
   4  -9   5 111.244  11.789   4
  -3  -8   5 61.7359 12.1138   2
  -3  -8   5 67.8014  9.7782   1
  -2  -8   5 9.72605 8.50867   2
  -2  -8   5 8.06330 5.90934   1
  -1  -8   5 510.436  29.450   2
   0  -8   5 6.00949 6.08744   2
   1  -8   5 249.101  16.496   4
   1  -8   5 258.670  16.072   2
   2  -8   5 30.4024 12.1931   3
   2  -8   5 19.7973  7.2078   4
   3  -8   5 59.1406 13.9848   3
   3  -8   5 66.2058  9.1179   4
   4  -8   5 83.7945  9.9450   4
   5  -8   5 -3.1150  6.9766   4
  -5  -7   5 186.794  18.030   1
  -4  -7   5 59.3091 10.6000   1
  -3  -7   5 210.302  18.326   2
  -3  -7   5 202.950  16.469   1
  -2  -7   5 32.2408  6.9922   1
  -2  -7   5 17.8361  8.0685   2
  -1  -7   5 94.5232  8.5846   1
  -1  -7   5 93.7736 10.0201   2
   0  -7   5 179.392  14.098   2
   0  -7   5 209.453  11.886   1
   0  -7   5 211.842  13.825   4
   1  -7   5 5.07674 9.33223   3
   1  -7   5 -1.7728  5.4560   4
   2  -7   5 987.492  43.327   4
   2  -7   5 1007.77   67.32   3
   3  -7   5 13.0250  9.4747   3
   3  -7   5 16.1575  6.2874   4
   4  -7   5 217.581  13.931   4
   4  -7   5 194.018  20.896   3
   5  -7   5 5.80435 6.46008   4
   5  -7   5 5.99496 4.32978   2
   6  -7   5 38.9921  6.7408   2
   7  -7   5 -5.0949  5.9837   2
  -6  -6   5 -1.3211  9.4329   1
  -5  -6   5 4.37523 9.00506   1
  -4  -6   5 6.64186 7.83734   1
  -3  -6   5 326.198  21.609   2
  -3  -6   5 296.624  20.234   1
  -2  -6   5 73.5991  9.1034   2
  -2  -6   5 71.6236  8.6606   1
  -1  -6   5 646.992  34.420   2
  -1  -6   5 669.536  33.009   1
   0  -6   5 2.96585 3.48306   1
   0  -6   5 7.01837 4.66394   4
   0  -6   5 1.46018 7.75687   3
   1  -6   5 462.091  22.521   4
   1  -6   5 479.297  35.665   3
   1  -6   5 493.237  24.146   2
   2  -6   5 17.1262  5.1666   4
   2  -6   5 9.64490 8.01578   3
   3  -6   5 26.4450  8.9068   3
   3  -6   5 16.2177  5.6485   4
   4  -6   5 82.3338 13.3162   3
   4  -6   5 74.8799  7.7478   4
   4  -6   5 72.0393  6.8241   2
   5  -6   5 113.388  15.793   3
   5  -6   5 103.879   8.977   4
   5  -6   5 84.4017  7.7702   2
   6  -6   5 115.226  10.618   2
   7  -6   5 27.9796  7.3916   2
  -6  -5   5 14.3153  9.5515   1
  -5  -5   5 396.230  25.998   1
  -4  -5   5 33.7768  8.7041   1
  -3  -5   5 531.784  29.165   1
  -3  -5   5 528.666  30.075   2
  -2  -5   5 38.3914  6.6384   1
  -2  -5   5 41.8790  6.7881   2
  -1  -5   5 801.008  37.826   1
  -1  -5   5 748.980  52.306   3
   0  -5   5 1292.68   54.58   4
   0  -5   5 1292.43   85.37   3
   0  -5   5 1406.88   61.79   1
   1  -5   5 133.656   9.058   4
   1  -5   5 123.676  14.427   3
   1  -5   5 123.298   8.200   2
   1  -5   5 138.393   7.630   1
   2  -5   5 1358.98   87.04   3
   2  -5   5 1366.06   55.97   4
   3  -5   5 16.9572  7.4781   3
   3  -5   5 18.5015  4.5226   4
   3  -5   5 3.05839 3.11771   2
   3  -5   5 18.5428  2.9548   2
   4  -5   5 277.885  14.607   4
   4  -5   5 295.322  24.425   3
   4  -5   5 259.527  15.029   2
   5  -5   5 150.331  18.956   3
   5  -5   5 148.348  10.922   2
   5  -5   5 155.513  10.874   4
   6  -5   5 2.82084 5.62124   2
   6  -5   5  2.7319 10.9928   3
   7  -5   5 11.3490  6.7881   2
   8  -5   5 44.9651  9.4925   2
  -7  -4   5 98.2649 14.4778   1
  -6  -4   5 48.4559 11.2124   1
  -5  -4   5 13.3058  8.2445   1
  -4  -4   5 34.2208  8.0332   1
  -3  -4   5 261.578  17.297   2
  -3  -4   5 260.374  16.892   1
  -2  -4   5 129.798  11.150   2
  -2  -4   5 155.405  11.177   1
  -1  -4   5 746.201  35.287   1
  -1  -4   5 705.921  48.227   3
   0  -4   5 1498.90   93.65   3
   0  -4   5 1512.50   68.36   1
   0  -4   5 1450.36   59.99   4
   1  -4   5 -0.2015  5.1703   3
   1  -4   5 3.08849 2.02315   2
   1  -4   5 -0.4021  2.9373   4
   1  -4   5 5.92509 2.31849   1
   2  -4   5 801.813  34.074   4
   2  -4   5 805.600  38.624   2
   2  -4   5 800.213  38.735   2
   2  -4   5 814.430  37.519   1
   2  -4   5 863.881  54.091   3
   3  -4   5 119.965   8.188   2
   3  -4   5 108.230   8.024   4
   3  -4   5 117.440  13.964   3
   3  -4   5 112.686   7.531   2
   4  -4   5 0.71659 3.28770   2
   4  -4   5 -4.6255  7.5114   3
   4  -4   5 -1.1749  3.6482   4
   5  -4   5 83.6687 14.6780   3
   5  -4   5 74.5056  7.3558   2
   6  -4   5 241.858  28.012   3
   6  -4   5 356.989  19.385   2
   7  -4   5 -16.888   9.807   3
   7  -4   5 1.71957 6.69856   2
   8  -4   5 177.398  16.274   2
   7   3  -5 70.0927 11.9254   1
  -7  -3   5 70.9226 12.8839   1
   6   3  -5 83.1729 11.4117   1
  -6  -3   5 80.4329 12.4424   1
   5   3  -5 902.594  46.332   1
  -5  -3   5 917.347  47.249   1
   4   3  -5 1.65459 4.35097   1
  -4  -3   5 1.64541 5.36688   1
   3   3  -5 2166.26  100.49   1
  -3  -3   5 2207.62  104.07   2
  -3  -3   5 2137.08  100.99   1
   2   3  -5 234.156  13.623   1
  -2  -3   5 242.120  14.383   1
   1   3  -5 2292.36  100.61   1
  -1  -3   5 2161.31  135.87   3
  -1  -3   5 2159.95  100.88   1
   0  -3   5 3572.80  213.34   3
   0  -3   5 3425.95  158.15   1
   1  -3   5 4.24282 2.38239   1
   1  -3   5 3.63597 2.39646   4
   1  -3   5 10.6794  4.9038   3
   2  -3   5 1201.54   77.10   3
   2  -3   5 1224.55   48.93   4
   2  -3   5 1214.30   57.23   2
   3  -3   5 543.375  26.508   2
   3  -3   5 528.996  22.723   4
   4  -3   5 315.319  17.552   2
   4  -3   5 289.193  26.684   3
   4  -3   5 326.022  14.786   4
   4  -3   5 352.817  17.477   1
   5  -3   5 385.485  20.986   1
   5  -3   5 372.771  21.215   2
   5  -3   5 414.123  33.156   3
   6  -3   5  2.1787 10.6301   3
   6  -3   5 -1.2876  5.4069   2
   6  -3   5 0.07226 5.41223   1
   7  -3   5 -0.5878  6.5879   2
   7  -3   5 -4.5635  6.0755   1
   7  -3   5 -2.9579 11.0759   3
   8  -3   5 0.03676 7.23491   1
   8  -3   5 0.89370 7.99887   2
   8  -3   5  5.9933 11.4341   3
   8   2  -5 12.0022  9.8089   1
   7   2  -5 173.083  16.365   1
   6   2  -5 77.5826 10.5168   1
  -6  -2   5 74.9794 11.5138   1
   5   2  -5 11.1974  5.6679   1
  -5  -2   5 9.12949 6.56124   1
   4   2  -5 261.639  16.430   1
  -4  -2   5 272.809  17.230   1
   3   2  -5 3.22313 3.34913   1
  -3  -2   5 2.10763 4.00328   1
  -3  -2   5 -2.0330  3.7728   2
   2   2  -5 3255.21  146.43   1
  -2  -2   5 3181.51  146.66   1
   1   2  -5 13.7799  2.6059   1
  -1  -2   5 10.1411  3.8014   3
  -1  -2   5 8.66767 2.69609   1
   0  -2   5 5530.95  324.01   3
   0  -2   5 5175.76  241.20   1
   1  -2   5 -0.2065  1.6389   2
   1  -2   5 1.27234 2.38597   1
   1  -2   5 1.85888 3.76153   3
   2  -2   5 1337.24   51.60   4
   2  -2   5 1178.55   81.35   3
   2  -2   5 1352.30   61.16   2
   3  -2   5 431.952  30.714   3
   3  -2   5 389.658  19.811   1
   3  -2   5 390.252  16.672   4
   3  -2   5 374.882  20.120   2
   4  -2   5 307.158  26.741   3
   4  -2   5 258.660  15.398   2
   4  -2   5 267.486  15.394   1
   5  -2   5 -2.3805  4.3531   1
   5  -2   5 -4.5195 10.0296   3
   5  -2   5 -2.2888  4.1846   2
   6  -2   5 814.143  42.350   2
   6  -2   5 860.883  62.047   3
   6  -2   5 796.982  41.420   1
   7  -2   5 -1.3098  6.4247   1
   7  -2   5 -4.6949 12.2379   3
   7  -2   5 -9.2289  6.5184   2
   8  -2   5 304.259  32.119   3
   8   1  -5 -3.2467  8.0333   1
   7   1  -5 165.923  15.960   1
   6   1  -5 2.94852 6.28419   1
  -6  -1   5 12.1499  7.2980   1
   5   1  -5 1157.26   55.43   1
  -5  -1   5 1104.74   55.63   1
   4   1  -5 22.4066  5.0348   1
  -4  -1   5 35.7804  6.2443   1
   3   1  -5 3506.33  156.57   1
  -3  -1   5 3360.36  156.61   1
   2   1  -5 386.988  19.490   1
  -2  -1   5 380.954  19.803   1
   1   1  -5 5.14337 2.04698   1
  -1  -1   5 11.8492  3.0476   3
  -1  -1   5 9.56246 2.47691   1
   0   1  -5 800.902  38.167   1
   0  -1   5 850.290  51.442   3
   0  -1   5 806.126  38.531   1
  -1   1  -5 250.387  13.478   1
   1  -1   5 264.804  18.713   3
  -2   1  -5 1259.15   57.18   1
   2  -1   5 1266.12   58.80   2
   2  -1   5 1190.31   79.15   3
   2  -1   5 1232.24   57.20   1
  -3   1  -5 2967.11  133.68   1
   3  -1   5 2944.43  133.80   1
   3  -1   5 2889.26  137.69   2
  -4   1  -5 237.792  14.401   1
   4  -1   5 246.865  14.342   2
   4  -1   5 232.127  14.420   1
   5  -1   5 12.9083  5.0730   2
   5  -1   5 11.2133  5.1207   1
   6  -1   5 155.228  13.655   2
   6  -1   5 171.515  13.493   1
   6  -1   5 162.424  23.291   3
   7  -1   5 88.1488 19.9072   3
   7  -1   5 95.2341 11.4179   1
   8  -1   5 -2.9513  7.4151   1
   8  -1   5 22.1786 15.8899   3
   8   0  -5 164.207  16.089   1
   7   0  -5 260.229  19.531   1
   6   0  -5 1.43139 5.69589   1
   5   0  -5 484.428  25.983   1
   5   0  -5 463.801  25.927   2
  -5   0   5 469.393  25.963   1
   4   0  -5 911.273  44.077   1
   4   0  -5 896.427  44.698   2
  -4   0   5 913.961  44.266   1
   3   0  -5 798.508  39.470   2
   3   0  -5 801.154  38.798   1
  -3   0   5 824.160  39.029   1
   2   0  -5 5291.39  240.34   1
  -2   0   5 5354.46  240.36   1
   1   0  -5 11.9853  2.3334   1
  -1   0   5 7.99403 2.39863   1
   0   0  -5 2412.21  110.49   1
   0   0   5 2348.70  110.52   1
   0   0   5 2519.97  147.53   3
  -1   0  -5 142.359   8.300   1
  -2   0  -5 231.811  12.927   1
   2   0   5 233.534  12.777   1
  -3   0  -5 296.003  15.806   1
   3   0   5 277.259  15.553   2
   3   0   5 265.754  15.603   1
  -4   0  -5 554.488  27.122   1
   4   0   5 516.893  26.956   2
   4   0   5 480.140  26.589   1
  -5   0  -5 2.28036 4.55796   1
   5   0   5 0.60586 4.69287   1
   6   0   5 661.553  35.205   1
   7   0   5 31.8906  8.8349   1
   8   0   5 34.5563 18.3622   3
   8   0   5 71.1492 11.3366   1
   8  -1  -5 3.55511 8.28866   1
   7  -1  -5 171.107  15.548   1
   6  -1  -5 2.33589 5.88616   2
   6  -1  -5 -3.2281  5.3415   1
   5  -1  -5 1329.43   64.64   2
   5  -1  -5 1317.98   63.39   1
   4  -1  -5 547.928  27.588   2
   4  -1  -5 521.250  27.113   1
  -4   1   5 522.093  27.239   1
   3  -1  -5 558.142  28.519   1
   3  -1  -5 596.373  29.162   2
  -3   1   5 586.864  28.674   1
   2  -1  -5 858.039  41.286   1
   2  -1  -5 931.637  42.627   2
  -2   1   5 853.385  41.311   1
   1  -1  -5 7.78997 2.43968   1
  -1   1   5 6.78768 2.75422   1
   0  -1  -5 575.368  27.926   1
  -1  -1  -5 2800.96  127.31   1
  -2  -1  -5 764.238  36.882   1
   2   1   5 767.888  36.756   1
  -3  -1  -5 44.4699  5.5976   1
   3   1   5 38.4937  5.3678   1
  -4  -1  -5 590.215  31.472   1
   4   1   5 635.560  31.544   1
  -5  -1  -5 2.40453 5.04149   1
   5   1   5 0.17001 4.88446   1
   6   1   5 483.563  28.006   1
   7   1   5 202.225  17.309   1
   8   1   5 3.54728 8.90312   1
   8  -2  -5 19.3922  8.7460   1
   7  -2  -5 392.565  25.160   2
   7  -2  -5 409.584  24.794   1
   6  -2  -5 57.8132  8.1841   1
   6  -2  -5 45.7599  7.7175   2
   5  -2  -5 913.265  46.374   1
   5  -2  -5 986.032  47.619   2
   4  -2  -5 2044.71   94.97   2
   4  -2  -5 1938.82   92.12   1
   3  -2  -5 547.829  27.959   1
   3  -2  -5 593.057  28.946   2
   2  -2  -5 3893.84  157.49   1
   2  -2  -5 3054.70  162.49   2
   1  -2  -5 91.6955  7.3432   1
   1  -2  -5 121.692   7.430   2
   0  -2  -5 2354.67  106.82   1
   0  -2  -5 2324.65  109.95   2
  -1  -2  -5 1710.79   79.69   1
  -1  -2  -5 1746.21   82.15   2
  -2  -2  -5 94.8673  5.5692   4
  -2  -2  -5 103.969   8.556   2
  -2  -2  -5 93.7477  8.5147   1
   2   2   5 101.434   8.366   1
  -3  -2  -5 9.26485 4.16005   1
   3   2   5 1.22794 3.77006   1
  -4  -2  -5 93.4226  9.0468   1
   4   2   5 91.0161  8.9393   1
  -5  -2  -5 86.3490  9.8302   1
   5   2   5 87.4587  9.7666   1
  -6  -2  -5 85.8593 10.7862   1
   6   2   5 67.9650 10.3688   1
   7   2   5 129.272  14.387   1
   8  -3  -5 7.94221 7.80236   1
   8  -3  -5 1.53617 8.57577   2
   7  -3  -5 25.5416  7.6502   1
   7  -3  -5 14.4751  7.7380   2
   6  -3  -5 201.922  14.182   1
   6  -3  -5 187.895  14.394   2
   6  -3  -5 171.417  12.691   4
   5  -3  -5 354.253  19.973   1
   5  -3  -5 354.325  20.657   2
   4  -3  -5 901.414  44.514   2
   4  -3  -5 903.101  43.318   1
   3  -3  -5 91.8149  7.4620   1
   3  -3  -5 94.1096  8.2869   2
   2  -3  -5 1755.57   86.98   2
   2  -3  -5 1897.15   83.92   1
   1  -3  -5 384.861  18.843   1
   1  -3  -5 335.141  18.427   2
   0  -3  -5 39.2358  4.6147   2
   0  -3  -5 46.4361  4.9074   1
  -1  -3  -5 163.742   8.860   4
  -1  -3  -5 163.936  11.248   2
  -1  -3  -5 166.480  10.807   1
  -2  -3  -5 1182.89   56.86   1
  -2  -3  -5 1188.79   58.45   2
  -2  -3  -5 1211.46   47.93   4
   2   3   5 1184.43   56.57   1
  -3  -3  -5 68.4154  7.5339   1
   3   3   5 52.4917  6.8628   1
  -4  -3  -5 1308.91   62.42   1
   4   3   5 1248.42   62.02   1
  -5  -3  -5 -4.5515  5.6974   1
   5   3   5 -2.8393  6.0321   1
  -6  -3  -5 142.247  14.444   1
   6   3   5 159.042  14.705   1
  -7  -3  -5 74.7400 12.0141   1
   8  -4  -5 -1.7910  8.3947   2
   8  -4  -5 -0.9853  6.4967   1
   7  -4  -5 375.874  23.618   2
   7  -4  -5 372.300  22.106   1
   6  -4  -5 37.6752  7.1017   4
   6  -4  -5 52.8606  7.2788   1
   6  -4  -5 41.5229  7.4903   2
   5  -4  -5 555.479  29.713   2
   5  -4  -5 582.023  28.375   1
   5  -4  -5 524.077  26.072   4
   4  -4  -5 484.052  24.168   1
   4  -4  -5 465.058  22.841   4
   4  -4  -5 478.090  25.402   2
   3  -4  -5 4.85908 4.58883   4
   3  -4  -5 7.84168 3.33980   1
   3  -4  -5 1.40922 3.86962   2
   2  -4  -5 793.248  36.887   1
   2  -4  -5 764.840  38.376   2
   2  -4  -5 757.430  33.594   4
   1  -4  -5 644.248  33.374   2
   1  -4  -5 678.699  29.480   4
   1  -4  -5 705.120  33.234   1
   0  -4  -5 221.868  13.598   1
   0  -4  -5 236.274  12.269   4
   0  -4  -5 230.627  13.979   2
  -1  -4  -5 141.403   8.902   4
  -1  -4  -5 149.070  10.718   1
  -1  -4  -5 155.755  11.342   2
  -2  -4  -5 176.386   9.332   4
  -2  -4  -5 144.111  11.851   1
  -2  -4  -5 145.858  12.426   2
  -3  -4  -5 32.2778  7.0781   2
  -3  -4  -5 33.2748  6.8396   1
  -4  -4  -5 -1.2330  5.7235   1
  -5  -4  -5 279.651  20.127   1
  -6  -4  -5 10.3162  8.2368   1
   8  -5  -5 7.48346 8.57499   2
   7  -5  -5 6.15682 7.09437   2
   6  -5  -5 451.657  23.846   4
   6  -5  -5 481.176  24.232   1
   6  -5  -5 444.865  26.258   2
   5  -5  -5 31.4209  7.1329   4
   5  -5  -5 23.6477  6.2638   2
   5  -5  -5 28.0885  4.9797   1
   4  -5  -5 805.470  40.661   2
   4  -5  -5 794.833  36.288   4
   4  -5  -5 816.817  38.212   1
   3  -5  -5 13.5651  3.5097   1
   3  -5  -5 11.8101  4.7289   2
   3  -5  -5 11.9593  5.5709   4
   2  -5  -5 742.797  38.047   2
   2  -5  -5 780.437  36.402   1
   2  -5  -5 762.223  33.925   4
   1  -5  -5 34.0196  5.1556   1
   1  -5  -5 22.8338  4.8330   2
   1  -5  -5 24.8272  5.3475   4
   0  -5  -5 118.709   9.178   4
   0  -5  -5 121.626   9.874   1
   0  -5  -5 109.376  10.060   2
  -1  -5  -5 -1.3846  4.1292   1
  -1  -5  -5 2.39927 4.66682   2
  -1  -5  -5 4.14478 3.80941   4
  -2  -5  -5 414.341  24.419   1
  -2  -5  -5 461.993  25.623   2
  -3  -5  -5 36.9360  8.3817   2
  -3  -5  -5 47.0949  8.1122   1
  -4  -5  -5 337.345  22.249   1
  -5  -5  -5 -1.2745  7.3734   1
  -6  -5  -5 20.7027  9.6473   1
   6  -6  -5 18.6479  7.0790   2
   6  -6  -5 17.2650  7.7558   4
   5  -6  -5 32.6174  6.8372   2
   5  -6  -5 34.1556  8.1191   4
   4  -6  -5 10.8769  6.9470   4
   4  -6  -5 18.3300  5.6558   2
   3  -6  -5 40.9148  6.9437   2
   3  -6  -5 24.6063  7.2092   4
   2  -6  -5 123.608  10.486   4
   2  -6  -5 121.839  10.868   2
   2  -6  -5 123.432   8.157   1
   1  -6  -5 189.042  13.434   2
   1  -6  -5 184.274  12.949   4
   1  -6  -5 200.150  12.467   1
   0  -6  -5 392.094  21.693   1
   0  -6  -5 357.234  21.707   2
   0  -6  -5 357.377  18.677   4
  -1  -6  -5 70.9263  8.9978   2
  -1  -6  -5 68.2546  8.3963   1
  -1  -6  -5 90.6176  7.6335   4
  -2  -6  -5 209.921  15.527   1
  -2  -6  -5 210.043  16.719   2
  -3  -6  -5 112.962  11.910   1
  -3  -6  -5 108.316  12.559   2
  -4  -6  -5 51.6481 10.1563   1
  -5  -6  -5 106.768  13.537   1
   6  -7  -5 192.461  15.784   4
   5  -7  -5 -4.7607  7.4818   4
   5  -7  -5 3.51482 5.94786   2
   4  -7  -5 521.817  28.872   2
   4  -7  -5 558.218  28.283   4
   3  -7  -5 26.6440  7.1526   2
   3  -7  -5 15.4960  7.9919   4
   2  -7  -5 78.9272  9.7280   4
   2  -7  -5 80.9297  8.8786   2
   1  -7  -5 -0.3061  5.5529   2
   1  -7  -5 4.24574 6.24817   4
   0  -7  -5 -2.4904  5.9581   2
   0  -7  -5 2.21789 6.09674   1
   0  -7  -5 -3.8207  5.3872   4
  -1  -7  -5 15.7810  6.7315   1
  -1  -7  -5 21.9926  6.2913   4
  -1  -7  -5 20.5637  8.0483   2
  -2  -7  -5 184.066  15.624   1
  -2  -7  -5 210.562  17.535   2
  -3  -7  -5 100.826  12.076   1
  -3  -7  -5 106.463  13.687   2
  -4  -7  -5 34.5893  9.7343   1
   5  -8  -5 2.41079 8.71928   4
   5  -8  -5 -0.0059  5.7377   2
   4  -8  -5 -6.0836  8.7340   4
   4  -8  -5 6.63693 5.77683   2
   3  -8  -5 37.0467  7.7020   2
   3  -8  -5 45.4678 10.2606   4
   2  -8  -5 124.788  12.271   2
   2  -8  -5 145.745  13.286   4
   1  -8  -5 40.4942  8.6119   4
   1  -8  -5 36.3530  8.1205   2
   0  -8  -5 247.613  18.117   2
   0  -8  -5 232.066  15.844   4
  -1  -8  -5 -6.9710  7.9365   2
  -1  -8  -5 12.7441  7.0905   1
  -2  -8  -5 133.680  12.811   1
  -2  -8  -5 104.289  13.905   2
   3  -9  -5 -6.0321  9.7183   4
   3  -9  -5 0.49004 6.75021   2
   2  -9  -5 69.2314 11.3638   4
   2  -9  -5 56.0822 10.4562   2
   1  -9  -5 -6.5044  7.4493   2
   1  -9  -5 2.55709 7.78885   4
   0  -9  -5 -3.3551  7.8646   2
   0  -9  -5 3.13541 7.46912   4
  -2  -9   6 51.7154 10.8615   2
  -1  -9   6 0.14509 7.51870   2
   0  -9   6 261.457  18.213   2
   1  -9   6 2.05674 5.88567   2
   3  -9   6 34.7978  9.2240   4
   4  -9   6 46.2657  9.8130   4
  -3  -8   6 89.3330 10.6300   1
  -3  -8   6 76.1704 12.7104   2
  -2  -8   6 78.8758 11.5081   2
  -2  -8   6 84.7154  9.3185   1
  -1  -8   6 161.906  14.806   2
   0  -8   6 19.3902  6.6961   2
   1  -8   6 2.45358 5.28694   2
   1  -8   6  0.8222 10.4709   3
   1  -8   6 -6.5606  6.6385   4
   2  -8   6 9.04511 7.37780   4
   2  -8   6 27.6627 12.3688   3
   3  -8   6 29.4896  8.0298   4
   3  -8   6 30.6230 12.0815   3
   4  -8   6 127.768  11.397   4
   4  -8   6 115.862  17.828   3
   5  -8   6 20.8761  8.1359   4
  -5  -7   6 148.897  15.828   1
  -4  -7   6 9.85759 8.63855   1
  -3  -7   6 146.019  13.395   1
  -3  -7   6 146.227  14.672   2
  -2  -7   6 345.328  22.833   2
  -2  -7   6 350.769  21.092   1
  -1  -7   6 25.9813  7.0720   2
  -1  -7   6 19.9706  5.6968   1
   0  -7   6 496.919  38.668   3
   0  -7   6 503.036  24.464   1
   0  -7   6 476.130  26.675   2
   1  -7   6 28.8865 11.1818   3
   1  -7   6 36.3587  6.9215   4
   2  -7   6 458.194  35.450   3
   2  -7   6 443.197  22.790   4
   3  -7   6 63.2019 13.0539   3
   3  -7   6 80.4538  8.5701   4
   4  -7   6 0.64169 5.75976   4
   4  -7   6 2.89824 9.13118   3
   5  -7   6 -4.1187  6.3682   4
   5  -7   6 -9.3881 10.0436   3
   5  -7   6 1.12940 4.68259   2
   6  -7   6 3.32147 5.63393   2
   7  -7   6 31.5228  7.4174   2
  -5  -6   6 7.06010 9.03541   1
  -4  -6   6 127.822  13.869   1
  -3  -6   6 143.790  13.532   2
  -3  -6   6 132.504  12.788   1
  -2  -6   6 389.726  23.399   1
  -2  -6   6 438.022  24.764   2
  -1  -6   6 3.17704 4.63403   1
  -1  -6   6 2.20548 5.16408   2
   0  -6   6 339.439  17.401   1
   0  -6   6 304.143  27.292   3
   1  -6   6 37.7480 10.1992   3
   1  -6   6 30.2137  5.7914   4
   2  -6   6 -2.4358  4.5872   4
   2  -6   6 3.52829 2.75994   2
   2  -6   6 11.6745  8.1071   3
   3  -6   6 104.624  14.679   3
   3  -6   6 96.5480  8.3793   4
   4  -6   6 492.294  37.291   3
   4  -6   6 441.178  24.181   2
   4  -6   6 530.966  23.257   4
   5  -6   6 -1.1636  9.6584   3
   5  -6   6 7.66982 4.95480   2
   5  -6   6 3.78350 5.74335   4
   6  -6   6 297.591  28.601   3
   6  -6   6 283.037  17.741   2
   7  -6   6 11.1718  6.9359   2
  -6  -5   6 34.4374 10.8751   1
  -5  -5   6 535.390  32.111   1
  -4  -5   6 3.73916 7.36333   1
  -3  -5   6 273.026  18.261   1
  -3  -5   6 274.371  18.852   2
  -2  -5   6 481.789  25.889   2
  -2  -5   6 438.251  24.777   1
  -1  -5   6 67.6977 11.2099   3
  -1  -5   6 62.2799  6.6828   1
   0  -5   6 666.757  31.132   1
   0  -5   6 623.786  27.975   4
   0  -5   6 631.209  44.483   3
   1  -5   6 389.452  18.757   1
   1  -5   6 370.779  28.943   3
   1  -5   6 380.508  18.166   4
   2  -5   6 274.146  23.300   3
   2  -5   6 269.497  14.314   4
   2  -5   6 285.418  14.561   2
   3  -5   6 129.926  15.603   3
   3  -5   6 135.065   9.373   4
   3  -5   6 129.650   8.040   2
   3  -5   6 105.152   8.631   2
   4  -5   6 47.2628 11.8569   3
   4  -5   6 61.2986  5.8224   2
   4  -5   6 48.8221  6.0610   4
   5  -5   6 2.53527 4.74262   2
   5  -5   6  6.9559 10.2957   3
   6  -5   6 0.27659 5.57147   2
   6  -5   6 -6.9150 10.9544   3
   7  -5   6 244.925  27.513   3
   7  -5   6 240.273  17.167   2
   8  -5   6 -3.0332  7.4767   2
  -7  -4   6 41.9665 11.9217   1
  -6  -4   6 67.9552 12.3021   1
  -5  -4   6 2.21036 7.95169   1
  -4  -4   6 746.276  39.404   1
  -3  -4   6 17.7209  5.9715   2
  -3  -4   6 17.6689  5.9392   1
  -2  -4   6 1956.27   92.99   1
  -2  -4   6 2044.16   95.89   2
  -1  -4   6 46.5032  5.5448   1
  -1  -4   6 47.0668  8.6581   3
   0  -4   6 788.506  52.285   3
   0  -4   6 792.736  37.482   1
   1  -4   6 22.4878  3.7933   4
   1  -4   6 19.3972  6.8974   3
   1  -4   6 27.3414  3.2677   2
   1  -4   6 22.6728  3.2618   1
   2  -4   6 78.4673  6.0161   4
   2  -4   6 82.3063  5.9455   2
   2  -4   6 78.3123  6.3555   2
   2  -4   6 90.5667 11.6382   3
   2  -4   6 100.097   6.571   1
   3  -4   6 12.4737  3.6628   4
   3  -4   6 15.6011  7.8325   3
   3  -4   6 14.5914  3.3685   2
   4  -4   6 1164.51   45.55   4
   4  -4   6 964.122  73.099   3
   4  -4   6 1161.56   53.49   2
   5  -4   6 -17.960   7.767   3
   5  -4   6 2.54583 4.64632   2
   6  -4   6 534.235  28.931   2
   7  -4   6 -3.3424  6.5250   2
   7  -4   6  3.8966 11.7987   3
   8  -4   6 36.4238  9.8981   2
   7   3  -6 263.946  20.260   1
  -7  -3   6 217.321  20.909   1
   6   3  -6 97.0786 12.3527   1
  -6  -3   6 130.744  14.526   1
   5   3  -6 536.420  30.793   1
  -5  -3   6 586.958  32.189   1
   4   3  -6 17.8082  5.5095   1
  -4  -3   6 21.1230  6.6663   1
   3   3  -6 51.2481  6.2078   1
  -3  -3   6 45.9416  6.9444   1
  -3  -3   6 48.4541  6.7406   2
   2   3  -6 17.7790  3.7579   1
  -2  -3   6 17.7828  4.5905   1
   1   3  -6 311.234  16.028   1
  -1  -3   6 296.871  16.515   1
  -1  -3   6 309.092  22.665   3
   0  -3   6 1357.92   63.54   1
   0  -3   6 1401.11   86.49   3
   1  -3   6 2060.86   92.46   1
   1  -3   6 1983.99  125.46   3
   2  -3   6 183.087  10.011   2
   2  -3   6 185.236   9.429   4
   2  -3   6 161.481  16.192   3
   3  -3   6 350.517  18.043   2
   3  -3   6 338.859  15.537   4
   4  -3   6 849.819  57.202   3
   4  -3   6 808.040  40.491   2
   4  -3   6 815.554  33.907   4
   5  -3   6 318.253  18.529   1
   5  -3   6 311.632  18.661   2
   5  -3   6 356.572  30.305   3
   6  -3   6 175.735  22.561   3
   6  -3   6 152.403  12.752   2
   6  -3   6 144.948  12.641   1
   7  -3   6 491.803  28.394   2
   7  -3   6 482.845  41.893   3
   8  -3   6  2.6785 12.3634   3
   8  -3   6 0.95493 8.40172   2
   8   2  -6 -2.3574  9.1108   1
   7   2  -6 208.241  18.230   1
   6   2  -6 205.186  16.571   1
  -6  -2   6 207.817  18.043   1
   5   2  -6 131.084  12.230   1
  -5  -2   6 139.064  13.114   1
   4   2  -6 2485.51  114.96   1
  -4  -2   6 2466.65  115.33   1
   3   2  -6 3.74772 3.41859   1
  -3  -2   6 -1.5648  4.0460   1
  -3  -2   6 0.65430 3.98277   2
   2   2  -6 2042.56   93.89   1
  -2  -2   6 2042.21   94.24   1
   1   2  -6 4.85106 2.36195   1
  -1  -2   6 6.31362 3.83037   3
  -1  -2   6 5.91410 2.77205   1
   0   2  -6 856.214  42.487   1
   0  -2   6 989.273  58.334   3
   0  -2   6 914.766  43.022   1
   1  -2   6 42.6851  7.0419   3
   1  -2   6 57.5148  5.1156   1
   2  -2   6 695.776  46.978   3
   2  -2   6 717.657  34.281   2
   3  -2   6 9.06334 3.30279   2
   3  -2   6 13.2323  8.0831   3
   4  -2   6 1411.66   69.94   2
   4  -2   6 1576.47   96.96   3
   4  -2   6 1415.21   68.25   1
   5  -2   6 119.222  10.632   1
   5  -2   6 148.645  20.978   3
   5  -2   6 141.693  10.918   2
   6  -2   6 194.564  14.860   2
   6  -2   6 223.346  26.338   3
   6  -2   6 182.329  14.450   1
   7  -2   6 200.482  26.189   3
   7  -2   6 173.481  15.805   2
   8  -2   6 -1.4725  7.7146   1
   8  -2   6  8.9608 14.0652   3
   8   1  -6 39.1962 10.5340   1
   7   1  -6 276.984  20.621   1
   6   1  -6 152.314  14.053   1
  -6  -1   6 144.450  13.949   1
   5   1  -6 74.3223  8.6596   1
  -5  -1   6 73.4727  9.4692   1
   4   1  -6 978.352  47.980   1
  -4  -1   6 994.623  48.408   1
   3   1  -6 1.58054 3.20305   1
  -3  -1   6 4.17867 3.82065   1
   2   1  -6 11.4094  3.0787   1
  -2  -1   6 15.2837  3.6034   1
   1   1  -6 2974.42  135.01   1
  -1  -1   6 2852.34  135.12   1
  -1  -1   6 3097.11  180.65   3
   0   1  -6 197.508  10.760   1
   0  -1   6 171.228  11.277   1
   0  -1   6 206.139  14.811   3
  -1   1  -6 16.7973  3.3551   1
   1  -1   6 21.7036  5.0778   3
   1  -1   6 15.9560  2.7675   2
  -2   1  -6 2855.28  123.14   1
   2  -1   6 2767.25  126.85   2
   2  -1   6 2475.49  167.15   3
  -3   1  -6 43.9253  4.8851   1
   3  -1   6 50.1443 11.0711   3
   3  -1   6 33.4165  4.9306   1
   3  -1   6 33.3255  4.5251   2
   4  -1   6 1062.66   54.31   1
   4  -1   6 1284.25   78.20   3
   4  -1   6 1117.53   55.58   2
   5  -1   6 847.443  45.040   1
   5  -1   6 889.839  45.875   2
   5  -1   6 1053.06   66.89   3
   6  -1   6 185.901  14.304   1
   6  -1   6 161.317  24.267   3
   7  -1   6 255.202  18.562   1
   7  -1   6 261.324  30.847   3
   8  -1   6  4.7180 14.3617   3
   8  -1   6 7.10675 8.50727   1
   8   0  -6 -2.1848  7.9954   1
   7   0  -6 347.170  23.146   1
   6   0  -6 441.468  25.815   1
   5   0  -6 219.105  14.741   1
  -5   0   6 193.795  15.021   1
   4   0  -6 1298.93   61.76   1
   4   0  -6 1307.56   63.11   2
  -4   0   6 1296.02   61.86   1
   3   0  -6 25.6107  4.1863   2
   3   0  -6 33.2419  4.6608   1
  -3   0   6 34.0468  5.0933   1
   2   0  -6 1971.71   92.01   1
  -2   0   6 2043.55   92.16   1
   1   0  -6 2172.33   99.34   1
  -1   0   6 2199.09   99.46   1
  -1   0   6 2151.75  131.77   3
   0   0  -6 95.6801  6.7502   1
   0   0   6 89.7351  8.4572   3
   0   0   6 89.1264  7.3124   1
  -1   0  -6 63.9748  5.5182   1
  -2   0  -6 37.1501  4.2196   1
   2   0   6 29.1970  4.1372   1
  -3   0  -6 474.813  23.947   1
   3   0   6 456.136  23.792   1
   3   0   6 447.668  23.841   2
  -4   0  -6 87.2301  7.8073   1
   4   0   6 64.9217  7.5619   1
   4   0   6 73.0740  7.2841   2
   5   0   6 610.551  32.225   1
   6   0   6 6.38090 6.53781   1
   7   0   6 207.805  16.919   1
   8   0   6 13.8683 16.3511   3
   8   0   6 15.0223  9.2651   1
   8  -1  -6 218.999  18.893   1
   7  -1  -6 47.1639  9.6261   1
   6  -1  -6 699.585  36.804   2
   6  -1  -6 665.826  35.995   1
   5  -1  -6 6.15947 4.78974   1
   5  -1  -6 16.1132  5.1234   2
   4  -1  -6 1818.23   87.42   1
   4  -1  -6 1952.88   90.04   2
  -4   1   6 1868.41   87.46   1
   3  -1  -6 672.326  33.742   2
   3  -1  -6 688.514  33.139   1
  -3   1   6 671.288  33.199   1
   2  -1  -6 66.3983  6.3177   2
   2  -1  -6 61.3119  5.3265   1
  -2   1   6 67.7908  5.6689   1
   1  -1  -6 98.9732  7.1810   2
   1  -1  -6 86.5784  7.2131   1
  -1   1   6 110.254   7.813   1
   0  -1  -6 2549.34  116.94   1
  -1  -1  -6 6.32045 2.66898   1
  -2  -1  -6 4840.20  219.48   1
   2   1   6 4838.71  219.31   1
  -3  -1  -6 59.6968  6.3952   1
   3   1   6 44.0412  5.8204   1
  -4  -1  -6 924.129  45.410   1
   4   1   6 915.580  45.388   1
  -5  -1  -6 104.038  10.299   1
   5   1   6 101.415  10.192   1
   6   1   6 37.7629  8.3959   1
   7   1   6 161.154  15.490   1
   8   1   6 41.1082 11.1615   1
   8  -2  -6 -6.1394  7.4907   1
   7  -2  -6 193.239  17.478   2
   7  -2  -6 212.253  16.611   1
   6  -2  -6 133.579  12.373   1
   6  -2  -6 126.187  12.372   2
   5  -2  -6 4.36953 4.64891   2
   5  -2  -6 0.88344 4.75932   1
   4  -2  -6 631.857  32.326   1
   4  -2  -6 663.396  33.206   2
   3  -2  -6 1664.42   76.69   2
   3  -2  -6 1535.04   74.13   1
   2  -2  -6 108.986   7.880   1
   2  -2  -6 99.2130  8.3611   2
  -2   2   6 109.291   8.080   1
   1  -2  -6 1306.32   61.17   1
   1  -2  -6 1318.52   63.03   2
   0  -2  -6 671.211  32.439   1
   0  -2  -6 657.787  32.725   2
  -1  -2  -6 138.974   9.671   1
  -1  -2  -6 149.805   9.822   2
  -2  -2  -6 162.214   7.957   4
  -2  -2  -6 158.005  11.169   1
  -2  -2  -6 153.787  11.297   2
   2   2   6 170.595  11.316   1
  -3  -2  -6 1064.20   50.95   1
   3   2   6 1031.96   50.56   1
  -4  -2  -6 9.75270 5.08943   1
   4   2   6 11.3203  5.3424   1
  -5  -2  -6 1047.19   52.74   1
   5   2   6 1055.22   52.61   1
  -6  -2  -6 9.38267 7.15912   1
   6   2   6 10.1477  7.2696   1
   7   2   6 162.089  16.117   1
   8  -3  -6 197.549  16.884   1
   8  -3  -6 189.906  17.856   2
   7  -3  -6 41.2552  8.6989   1
   7  -3  -6 37.1724  8.9406   2
   6  -3  -6 905.730  46.308   1
   6  -3  -6 953.864  47.760   2
   5  -3  -6 2.09407 4.85185   2
   5  -3  -6 -3.9686  4.3774   1
   4  -3  -6 742.008  36.693   2
   4  -3  -6 702.988  35.474   1
   3  -3  -6 52.2842  5.4750   1
   3  -3  -6 43.3443  5.7274   2
   2  -3  -6 80.7990  7.3153   1
   2  -3  -6 81.2279  7.2281   2
   1  -3  -6 0.26936 3.22511   1
   1  -3  -6 -0.6299  2.9189   2
   0  -3  -6 2260.76  107.32   2
   0  -3  -6 2273.79  104.38   1
  -1  -3  -6 182.161  11.928   1
  -1  -3  -6 184.941  12.482   2
  -1  -3  -6 193.860   9.880   4
  -2  -3  -6 1202.19   56.05   1
  -2  -3  -6 1130.28   57.29   2
  -2  -3  -6 1165.05   46.99   4
  -3  -3  -6 24.0337  6.0419   1
   3   3   6 33.0958  6.2222   1
  -4  -3  -6 107.885  10.690   1
   4   3   6 113.449  10.730   1
  -5  -3  -6 5.22001 6.15014   1
   5   3   6 2.71189 6.58585   1
  -6  -3  -6 12.2928  8.0343   1
   6   3   6 11.6842  8.3804   1
   8  -4  -6 26.7818  8.2074   1
   8  -4  -6 16.1043  9.6704   2
   7  -4  -6 9.37244 6.59384   1
   7  -4  -6 3.71710 7.16861   2
   6  -4  -6 6.79108 6.41211   2
   6  -4  -6 19.2405  6.0578   1
   6  -4  -6 9.08156 6.08896   4
   5  -4  -6 84.8791  9.1377   2
   5  -4  -6 96.8678  8.6517   1
   5  -4  -6 96.4855  9.0185   4
   4  -4  -6 25.4576  5.6933   2
   4  -4  -6 35.3059  5.3183   1
   3  -4  -6 401.222  19.912   1
   3  -4  -6 357.832  21.050   2
   2  -4  -6 526.795  28.709   2
   2  -4  -6 560.639  27.227   1
   1  -4  -6 90.0163  8.3635   2
   1  -4  -6 107.967   8.797   4
   1  -4  -6 100.324   8.740   1
   0  -4  -6 593.887  30.337   2
   0  -4  -6 585.282  25.928   4
   0  -4  -6 586.419  29.900   1
  -1  -4  -6 449.731  24.201   2
  -1  -4  -6 453.517  19.894   4
  -1  -4  -6 411.636  23.239   1
  -2  -4  -6 533.862  28.490   2
  -2  -4  -6 503.836  27.675   1
  -3  -4  -6 903.000  45.676   1
  -4  -4  -6 1.32569 5.88537   1
  -5  -4  -6 372.488  24.174   1
  -6  -4  -6 -6.6095  7.5753   1
   8  -5  -6 193.147  17.316   2
   7  -5  -6 11.5889  7.7171   2
   6  -5  -6 467.030  24.256   1
   6  -5  -6 459.265  26.507   2
   6  -5  -6 442.303  23.840   4
   5  -5  -6 21.2078  7.0816   4
   5  -5  -6 27.5936  6.7653   2
   5  -5  -6 27.6916  5.3756   1
   4  -5  -6 139.538  11.470   4
   4  -5  -6 152.011  12.517   2
   4  -5  -6 163.786  10.499   1
   3  -5  -6 92.4290  7.7602   1
   3  -5  -6 88.7836  9.0233   4
   3  -5  -6 94.2131  8.5903   2
   2  -5  -6 6.65756 3.61625   1
   2  -5  -6 4.18173 4.89477   2
   2  -5  -6 5.24017 5.32569   4
   1  -5  -6 30.2661  5.5966   2
   1  -5  -6 43.8814  6.4120   4
   1  -5  -6 45.7565  6.1312   1
   0  -5  -6 446.330  23.860   2
   0  -5  -6 421.645  20.395   4
   0  -5  -6 413.508  23.550   1
  -1  -5  -6 130.377  11.970   2
  -1  -5  -6 136.450   9.616   4
  -1  -5  -6 133.361  11.257   1
  -2  -5  -6 45.8284  7.6316   1
  -2  -5  -6 54.3807  8.4151   2
  -3  -5  -6 329.349  21.207   1
  -4  -5  -6 18.0863  7.9941   1
  -5  -5  -6 5.80872 7.86725   1
   7  -6  -6 2.69936 7.41677   2
   6  -6  -6 18.4016  7.2277   2
   6  -6  -6 23.9126  8.2154   4
   5  -6  -6 65.1386  8.6007   2
   5  -6  -6 69.6175  9.6873   4
   4  -6  -6 109.315  10.209   2
   4  -6  -6 127.195  11.562   4
   3  -6  -6 153.211  12.572   4
   3  -6  -6 161.899  12.985   2
   2  -6  -6 511.659  26.019   1
   2  -6  -6 516.591  28.732   2
   2  -6  -6 557.779  26.392   4
   1  -6  -6 5.87561 4.52395   1
   1  -6  -6 8.24943 5.48744   2
   1  -6  -6 3.29947 5.53181   4
   0  -6  -6 711.443  36.121   2
   0  -6  -6 616.665  35.649   1
   0  -6  -6 707.186  30.823   4
  -1  -6  -6 79.0524  8.9495   1
  -1  -6  -6 72.3337  9.3093   2
  -1  -6  -6 62.8576  7.2430   4
  -2  -6  -6 71.2761  9.5293   1
  -2  -6  -6 76.5708 10.2562   2
  -3  -6  -6 260.205  18.949   1
  -4  -6  -6 0.15919 7.68878   1
  -5  -6  -6 131.165  14.834   1
   6  -7  -6 73.7919  9.6109   2
   6  -7  -6 89.7589 11.3079   4
   5  -7  -6 50.7561 10.0905   4
   5  -7  -6 53.0195  8.2264   2
   4  -7  -6 87.5142  9.5924   2
   4  -7  -6 92.9081 11.5572   4
   3  -7  -6 3.45419 6.34802   2
   3  -7  -6 1.18638 7.61926   4
   2  -7  -6 -2.3712  6.7602   2
   2  -7  -6 0.15568 7.30831   4
   1  -7  -6 151.862  12.935   2
   1  -7  -6 131.689  11.297   4
   1  -7  -6 116.570  10.210   1
   0  -7  -6 1.66879 6.55218   2
   0  -7  -6 0.37089 5.90533   1
   0  -7  -6 1.24976 6.15784   4
  -1  -7  -6 357.718  23.584   2
  -1  -7  -6 374.191  22.858   1
  -2  -7  -6 47.6385 10.2609   2
  -2  -7  -6 36.2369  8.7628   1
  -3  -7  -6 190.953  16.794   1
   5  -8  -6 4.87409 6.21157   2
   5  -8  -6 5.51562 9.08325   4
   4  -8  -6 53.9568  8.3947   2
   4  -8  -6 87.5499 12.3876   4
   3  -8  -6 29.0984  7.7793   2
   3  -8  -6 26.4876 10.0345   4
   2  -8  -6 150.071  13.841   4
   2  -8  -6 131.255  13.467   2
   1  -8  -6 7.90654 7.53904   4
   1  -8  -6 12.4769  7.5928   2
   0  -8  -6 108.280  10.912   4
   0  -8  -6 121.363  12.529   2
  -1  -8  -6 19.9144  9.0635   2
  -1  -8  -6 22.0974  7.9928   1
  -2  -8  -6 5.51557 9.65557   2
  -2  -8  -6 7.17592 8.08151   1
   2  -9  -6 38.8032 10.2952   4
   2  -9  -6 23.9424  9.5531   2
   1  -9  -6 78.6009 11.4023   2
   1  -9  -6 71.6252 10.7338   4
  -2  -9   7 164.131  15.759   2
  -1  -9   7 23.9597  8.6841   2
   0  -9   7 191.070  15.437   2
   1  -9   7 2.24776 6.01289   2
   2  -9   7 49.6949 15.1725   3
   3  -9   7  6.4489 12.1614   3
  -3  -8   7 15.5536  7.3710   1
  -3  -8   7 16.4356  9.9798   2
  -2  -8   7 126.496  12.084   1
  -2  -8   7 109.035  12.944   2
  -1  -8   7 1.09272 4.79218   1
  -1  -8   7 -1.0195  7.1421   2
   0  -8   7 4.57861 6.19853   2
   1  -8   7 57.0119 14.7937   3
   1  -8   7 38.2743  6.6729   2
   2  -8   7 230.150  24.767   3
   3  -8   7 3.67826 7.12571   4
   3  -8   7  8.4553 11.0436   3
   4  -8   7 267.636  26.588   3
   4  -8   7 255.621  17.018   4
  -4  -7   7 24.8827  9.3293   1
  -3  -7   7 4.88896 7.40573   1
  -3  -7   7 -2.2881  8.0021   2
  -2  -7   7 298.638  19.610   1
  -2  -7   7 322.770  21.415   2
  -1  -7   7 92.0774 10.1147   2
  -1  -7   7 91.3007  8.9607   1
   0  -7   7 177.130  11.527   1
   0  -7   7 187.845  21.749   3
   1  -7   7 54.9257 13.5054   3
   2  -7   7 172.873  20.234   3
   2  -7   7 181.099  13.239   4
   3  -7   7 62.5392 13.8042   3
   3  -7   7 60.2144  8.1750   4
   4  -7   7 0.45954 6.05806   4
   4  -7   7 6.84190 9.99841   3
   5  -7   7 239.389  15.969   4
   5  -7   7 263.203  27.640   3
   6  -7   7 9.08435 6.04804   2
  -5  -6   7 8.90327 9.26348   1
  -4  -6   7 406.380  25.935   1
  -3  -6   7 16.1718  7.9644   2
  -3  -6   7 12.0494  7.4520   1
  -2  -6   7 306.323  19.080   1
  -2  -6   7 308.857  20.115   2
  -1  -6   7 2.18681 4.79416   1
   0  -6   7 1.50601 3.76686   1
   0  -6   7 -3.5811  7.7874   3
   1  -6   7 6.11184 8.37075   3
   1  -6   7 15.8140  3.2649   1
   1  -6   7 11.6077  5.1118   4
   2  -6   7 470.489  36.239   3
   2  -6   7 495.720  23.029   4
   3  -6   7 14.4883  9.4689   3
   3  -6   7 19.0727  5.6452   4
   4  -6   7 309.631  17.020   4
   4  -6   7 326.249  28.622   3
   5  -6   7 -1.0350  5.7130   4
   5  -6   7 2.69517 5.01273   2
   5  -6   7  3.8285 10.6857   3
   6  -6   7 24.9939 14.6707   3
   6  -6   7 22.8160  6.5961   2
   7  -6   7 -5.9621  6.4351   2
  -6  -5   7 9.96027 9.83583   1
  -5  -5   7 105.891  13.574   1
  -4  -5   7 -0.4196  7.3536   1
  -3  -5   7 128.533  12.172   2
  -3  -5   7 153.347  13.346   1
  -2  -5   7 305.541  18.332   2
  -2  -5   7 265.418  17.583   1
  -1  -5   7 157.288  11.269   1
  -1  -5   7 157.118  17.098   3
   0  -5   7 460.314  23.089   1
   0  -5   7 452.607  34.066   3
   1  -5   7 214.142  12.193   4
   1  -5   7 206.984  19.771   3
   1  -5   7 219.329  11.932   1
   2  -5   7 721.671  34.065   1
   2  -5   7 735.402  50.617   3
   2  -5   7 723.230  31.575   4
   2  -5   7 751.831  35.872   2
   3  -5   7 363.928  17.401   4
   3  -5   7 350.619  28.954   3
   3  -5   7 343.277  18.362   2
   3  -5   7 357.006  17.346   1
   4  -5   7 352.196  17.875   4
   4  -5   7 382.212  31.150   3
   4  -5   7 366.313  19.693   2
   5  -5   7 679.642  33.965   2
   5  -5   7 630.024  49.434   3
   6  -5   7 29.2600 13.9652   3
   6  -5   7 32.5426  7.0713   2
   7  -5   7 178.136  26.034   3
   7  -5   7 265.542  17.374   2
  -7  -4   7 11.0290 10.6674   1
  -6  -4   7 404.641  27.612   1
  -5  -4   7 4.52199 7.98010   1
  -4  -4   7 830.605  43.186   1
  -3  -4   7 108.300  10.249   2
  -3  -4   7 105.862  10.228   1
  -2  -4   7 513.741  26.934   1
  -1  -4   7 15.8454  4.4331   1
  -1  -4   7 17.4763  7.2052   3
   0  -4   7 63.3333  9.6376   3
   0  -4   7 57.1905  5.6168   1
   1  -4   7 68.8162 10.2425   3
   1  -4   7 60.7721  6.1161   2
   1  -4   7 67.1673  5.4485   1
   2  -4   7 497.553  26.119   2
   2  -4   7 569.275  26.099   1
   2  -4   7 510.843  37.779   3
   2  -4   7 526.274  23.272   4
   2  -4   7 548.660  26.980   2
   3  -4   7 269.698  13.413   4
   3  -4   7 293.844  15.345   1
   3  -4   7 267.111  14.639   2
   3  -4   7 226.103  22.772   3
   4  -4   7 226.136  13.846   2
   4  -4   7 231.350  12.403   4
   5  -4   7 682.089  32.898   2
   5  -4   7 555.369  47.157   3
   6  -4   7 26.7512 13.8276   3
   6  -4   7 25.5373  6.9127   2
   7  -4   7 29.7722  8.1692   2
   7  -4   7 36.5111 14.9841   3
   8  -4   7 26.1612  9.2628   2
   8  -4   7  9.1968 13.2166   3
   7   3  -7 47.6503 11.0718   1
  -7  -3   7 68.5389 13.1290   1
   6   3  -7 328.064  22.732   1
  -6  -3   7 354.140  24.386   1
   5   3  -7 11.8102  6.2393   1
  -5  -3   7 13.6197  7.6482   1
   4   3  -7 4.35323 4.85812   1
  -4  -3   7 0.27981 5.61635   1
   3   3  -7 242.302  15.233   1
  -3  -3   7 254.187  16.204   1
  -3  -3   7 246.984  16.209   2
   2   3  -7 200.446  12.349   1
  -2  -3   7 195.635  13.150   1
   1   3  -7 446.661  22.003   1
  -1  -3   7 413.604  22.455   1
  -1  -3   7 455.749  30.914   3
   0  -3   7 4382.57  258.85   3
   0  -3   7 4109.90  192.10   1
   1  -3   7 85.5532  7.3896   1
   1  -3   7 74.5103 10.3874   3
   2  -3   7 1670.20   77.43   1
   2  -3   7 1682.24   79.15   2
   3  -3   7 1126.33   52.29   2
   3  -3   7 1031.10   71.16   3
   4  -3   7 754.319  38.494   2
   4  -3   7 801.862  54.867   3
   5  -3   7 798.529  54.937   3
   5  -3   7 687.222  37.143   2
   6  -3   7 28.5919  7.0675   2
   6  -3   7 58.2514 16.0275   3
   7  -3   7 260.290  19.371   2
   7  -3   7 307.035  30.969   3
   8  -3   7 45.2470 10.4707   2
   8  -3   7 32.4089 15.4156   3
   8   2  -7 46.5754 11.6519   1
   7   2  -7 44.6733 10.8987   1
   6   2  -7 315.677  21.397   1
  -6  -2   7 310.710  22.511   1
   5   2  -7 78.1531  9.4828   1
  -5  -2   7 89.0125 10.5995   1
   4   2  -7 626.984  31.899   1
  -4  -2   7 594.850  32.387   1
   3   2  -7 444.478  23.360   1
  -3  -2   7 446.743  24.318   2
  -3  -2   7 432.548  23.747   1
   2   2  -7 30.5334  4.4837   1
  -2  -2   7 37.4635  5.2910   1
  -2  -2   7 29.5598  6.6868   3
   1   2  -7 162.443   9.911   1
  -1  -2   7 174.746  14.061   3
  -1  -2   7 156.351  10.567   1
   0   2  -7 17.1968  2.9977   1
   0  -2   7 17.0562  5.1465   3
   0  -2   7 17.2936  3.6615   1
  -1   2  -7 794.634  35.222   1
   1  -2   7 680.027  48.186   3
  -2   2  -7 101.013   8.191   1
   2  -2   7 97.9749  7.4155   2
   2  -2   7 110.175  12.413   3
   3  -2   7 2663.32  131.35   2
   3  -2   7 2937.77  174.37   3
   4  -2   7  6.9547 10.1066   3
   4  -2   7 11.3149  4.2935   2
   5  -2   7 727.745  37.695   1
   5  -2   7 721.401  38.254   2
   5  -2   7 828.423  57.394   3
   6  -2   7 86.5999 18.8645   3
   6  -2   7 71.0528  9.1585   2
   6  -2   7 71.0215  9.3330   1
   7  -2   7 110.234  12.421   1
   7  -2   7 164.983  23.853   3
   8  -2   7 34.5692 15.9592   3
   8   1  -7 333.436  24.378   1
   7   1  -7 31.5459  9.2488   1
   6   1  -7 489.750  28.617   1
  -6  -1   7 510.914  29.593   1
   5   1  -7 115.870  11.091   1
  -5  -1   7 108.063  11.267   1
   4   1  -7 254.901  15.855   1
  -4  -1   7 258.790  16.555   1
   3   1  -7 47.8587  5.8127   1
  -3  -1   7 55.6480  6.4986   1
   2   1  -7 1680.98   76.59   1
  -2  -1   7 1623.71   76.63   1
   1   1  -7 13.0389  2.9267   1
  -1  -1   7 12.4672  3.8720   3
  -1  -1   7 14.2865  3.4263   1
   0   1  -7 1829.32   84.52   1
   0  -1   7 1793.68   84.83   1
   0  -1   7 1890.99  113.19   3
  -1   1  -7 88.0284  7.7246   1
   1  -1   7 106.510  10.714   3
  -2   1  -7 1856.94   86.51   1
   2  -1   7 1854.25  118.33   3
   2  -1   7 1929.00   89.01   2
  -3   1  -7 29.9840  4.5935   1
   3  -1   7 21.6135  9.9177   3
   3  -1   7 25.3293  4.3730   2
   4  -1   7 -0.0630  3.9004   2
   4  -1   7 2.38851 4.38501   1
   4  -1   7 0.26533 9.60251   3
   5  -1   7 328.554  19.787   1
   5  -1   7 307.769  31.304   3
   5  -1   7 341.623  19.666   2
   6  -1   7 121.655  21.922   3
   6  -1   7 124.092  11.764   1
   7  -1   7 17.4491  8.1566   1
   7  -1   7 15.3547 15.8066   3
   8  -1   7 60.8570 11.4322   1
   8  -1   7 57.5957 19.3148   3
   8   0  -7 -0.9768  8.2393   1
   7   0  -7 4.49400 7.55087   1
   6   0  -7 176.773  14.684   1
   5   0  -7 406.794  23.650   1
  -5   0   7 425.999  24.253   1
   4   0  -7 263.241  15.983   1
   4   0  -7 262.476  15.890   2
  -4   0   7 259.605  16.301   1
   3   0  -7 1706.85   80.43   2
   3   0  -7 1617.60   78.26   1
  -3   0   7 1721.03   78.54   1
   2   0  -7 834.257  40.428   1
  -2   0   7 860.994  40.654   1
   1   0  -7 601.692  29.824   1
  -1   0   7 595.586  30.025   1
  -1   0   7 633.048  38.470   3
   0   0  -7 2141.69   97.46   1
   0   0   7 2215.40  129.82   3
   0   0   7 2011.58   97.44   1
  -1   0  -7 2451.86  111.32   1
   1   0   7 2411.73  149.78   3
  -2   0  -7 610.143  29.685   1
   2   0   7 593.336  30.055   2
  -3   0  -7 3261.32  146.26   1
   3   0   7 3191.66  146.16   1
   3   0   7 3127.96  150.31   2
  -4   0  -7 49.1057  6.5000   1
   4   0   7 41.5033  6.1071   2
   4   0   7 43.2447  6.4451   1
   5   0   7 878.972  44.259   1
   6   0   7 -2.0230  6.0596   1
   7   0   7  8.8162 15.5302   3
   7   0   7 9.84940 7.72440   1
   8   0   7 16.0331  9.7655   1
   8   0   7 -0.9102 14.8506   3
   8  -1  -7 445.458  28.483   1
   7  -1  -7 0.11387 7.16680   1
   6  -1  -7 372.602  22.925   1
   6  -1  -7 387.532  23.454   2
   5  -1  -7 3.88694 4.99267   2
   5  -1  -7 1.07262 4.60580   1
   4  -1  -7 4.29001 4.19046   2
   4  -1  -7 10.3860  4.3477   1
  -4   1   7 10.0157  4.7404   1
   3  -1  -7 5.86374 3.52224   1
   3  -1  -7 3.59038 3.37195   2
  -3   1   7 -2.4001  3.3785   1
   2  -1  -7 2625.27  119.58   1
   2  -1  -7 2495.25  123.31   2
  -2   1   7 2729.93  119.70   1
  -1   1   7 398.779  21.032   1
   0  -1  -7 1984.49   92.04   1
  -1  -1  -7 793.618  38.200   1
  -2  -1  -7 163.595  11.115   1
  -3  -1  -7 200.373  13.440   1
   3   1   7 197.937  13.160   1
  -4  -1  -7 161.862  12.724   1
   4   1   7 166.654  12.711   1
  -5  -1  -7 1.47526 5.22072   1
   5   1   7 -2.9845  5.4051   1
   6   1   7 124.453  12.506   1
   7   1   7 123.066  13.852   1
   8   1   7 32.4320 20.3491   3
   8  -2  -7 11.6569  8.8167   1
   7  -2  -7 86.0420 11.1771   1
   7  -2  -7 75.0601 11.1295   2
   6  -2  -7 28.7731  7.2232   1
   6  -2  -7 13.8078  6.8613   2
   5  -2  -7 517.153  28.641   2
   5  -2  -7 527.862  27.978   1
   4  -2  -7 530.626  28.933   1
   4  -2  -7 605.194  29.983   2
   3  -2  -7 10.6192  3.8459   1
   3  -2  -7 13.2181  4.3478   2
   2  -2  -7 1656.62   77.58   1
   2  -2  -7 1676.43   79.93   2
  -2   2   7 1680.42   77.41   1
   1  -2  -7 469.730  21.775   1
   1  -2  -7 385.812  22.186   2
  -1   2   7 383.758  21.731   1
   0  -2  -7 2215.47  102.13   1
   0  -2  -7 2196.91  104.34   2
  -1  -2  -7 5460.51  249.48   2
  -1  -2  -7 5200.94  241.61   1
  -2  -2  -7 15.4257  4.6519   2
  -2  -2  -7 23.4589  4.8553   1
  -2  -2  -7 26.0055  2.8897   4
  -3  -2  -7 1537.54   71.20   1
   3   2   7 1448.68   70.65   1
  -4  -2  -7 66.1952  8.3743   1
   4   2   7 70.8282  8.4968   1
  -5  -2  -7 334.502  21.782   1
   5   2   7 355.302  21.906   1
  -6  -2  -7 17.9854  7.9233   1
   6   2   7 10.9573  7.9501   1
   7   2   7 -5.8661  8.3952   1
   8  -3  -7 147.559  14.878   1
   8  -3  -7 168.020  15.896   2
   7  -3  -7 28.6322  8.6108   2
   7  -3  -7 30.0201  8.4147   1
   6  -3  -7 156.208  13.209   1
   6  -3  -7 155.519  14.129   2
   5  -3  -7 122.694  11.191   1
   5  -3  -7 134.787  12.249   2
   4  -3  -7 46.3611  6.2215   1
   4  -3  -7 54.8960  6.7951   2
   3  -3  -7 86.1232  7.9336   2
   2  -3  -7 343.443  18.995   2
   2  -3  -7 323.751  18.223   1
   1  -3  -7 164.846  11.556   2
   1  -3  -7 189.245  11.948   1
   0  -3  -7 126.452  10.378   1
   0  -3  -7 127.986   9.785   2
  -1  -3  -7 2175.34   85.69   4
  -1  -3  -7 2094.48   99.32   1
  -1  -3  -7 2162.92  102.41   2
  -2  -3  -7 104.208  10.014   2
  -2  -3  -7 100.569   9.751   1
  -3  -3  -7 206.969  14.948   1
   3   3   7 209.915  14.892   1
  -4  -3  -7 121.674  11.715   1
   4   3   7 126.477  11.738   1
  -5  -3  -7 28.0247  8.1424   1
   5   3   7 15.6820  7.8532   1
  -6  -3  -7 75.7686 11.4907   1
   8  -4  -7 54.1742 11.1808   2
   8  -4  -7 50.6504  9.2971   1
   7  -4  -7 27.5776  7.5577   1
   7  -4  -7 26.4120  8.4935   2
   6  -4  -7 35.4498  7.7377   4
   6  -4  -7 48.3763  7.7210   1
   6  -4  -7 54.0846  8.7334   2
   5  -4  -7 56.9184  8.0779   2
   5  -4  -7 55.1706  7.2324   1
   4  -4  -7 585.555  31.578   2
   4  -4  -7 597.427  29.987   1
   3  -4  -7 35.2094  5.1574   1
   3  -4  -7 31.8087  6.0674   2
   2  -4  -7 1347.57   60.16   1
   2  -4  -7 1190.43   62.46   2
   1  -4  -7 443.819  24.345   2
   1  -4  -7 472.421  24.271   1
   0  -4  -7 270.806  17.098   1
   0  -4  -7 277.658  14.440   4
   0  -4  -7 275.919  16.664   2
  -1  -4  -7 404.395  18.468   4
  -1  -4  -7 383.983  22.057   1
  -1  -4  -7 401.304  22.618   2
  -2  -4  -7 5.07916 4.90162   1
  -2  -4  -7 -1.3582  5.1650   2
  -3  -4  -7 321.867  20.452   1
  -4  -4  -7 171.131  14.854   1
  -5  -4  -7 96.2783 12.1056   1
  -6  -4  -7 17.7526  8.8483   1
   7  -5  -7 138.485  13.254   2
   6  -5  -7 115.942  10.323   1
   6  -5  -7 106.180  10.989   4
   6  -5  -7 125.133  11.896   2
   5  -5  -7 1.61187 6.14226   2
   5  -5  -7 4.32501 6.51836   4
   5  -5  -7 4.84313 4.93122   1
   4  -5  -7 35.1020  5.6083   1
   4  -5  -7 25.1074  6.7240   2
   4  -5  -7 28.3817  7.3636   4
   3  -5  -7 86.9258  7.9294   1
   3  -5  -7 83.1644  8.7575   2
   3  -5  -7 73.4893  8.9527   4
   2  -5  -7 17.7690  6.3151   4
   2  -5  -7 23.7108  4.7978   1
   2  -5  -7 11.7064  6.1333   2
   1  -5  -7 1788.55   80.51   1
   1  -5  -7 1729.57   71.00   4
   1  -5  -7 1629.38   82.70   2
   0  -5  -7 -3.5064  4.3118   4
   0  -5  -7 3.24714 5.52213   1
   0  -5  -7 5.03299 5.04435   2
  -1  -5  -7 786.773  41.296   1
  -1  -5  -7 844.405  35.359   4
  -1  -5  -7 826.744  42.549   2
  -2  -5  -7 27.8643  6.9944   1
  -2  -5  -7 27.8185  7.3728   2
  -3  -5  -7 194.578  15.663   1
  -4  -5  -7 27.3054  8.2683   1
  -5  -5  -7 18.4684  8.6689   1
   7  -6  -7 24.5240  8.3048   2
   7  -6  -7 37.4317  9.1918   4
   6  -6  -7 116.945  11.823   2
   6  -6  -7 107.717  11.743   4
   5  -6  -7 36.8961  7.7183   2
   5  -6  -7 35.5843  8.7496   4
   4  -6  -7 215.266  16.322   2
   3  -6  -7 51.4706  8.0641   2
   3  -6  -7 58.9842  9.3084   4
   3  -6  -7 60.1174  5.9092   1
   2  -6  -7 268.189  18.379   2
   2  -6  -7 239.977  15.001   1
   2  -6  -7 286.706  17.450   4
   1  -6  -7 -1.0619  5.5859   2
   1  -6  -7 5.46637 5.88412   4
   1  -6  -7 2.87772 4.70833   1
   0  -6  -7 11.8328  5.7604   4
   0  -6  -7 14.6371  6.9051   1
   0  -6  -7 6.13963 6.22290   2
  -1  -6  -7 54.8082  8.9583   2
  -1  -6  -7 58.6620  8.7500   1
  -1  -6  -7 52.1278  7.1159   4
  -2  -6  -7 102.560  11.633   2
  -2  -6  -7 95.7874 11.2338   1
  -3  -6  -7 160.773  15.126   1
  -4  -6  -7 47.0558 10.3627   1
   6  -7  -7 61.0701 10.7174   4
   6  -7  -7 54.4565  9.1724   2
   5  -7  -7 17.8226  8.8737   4
   5  -7  -7 18.2020  7.1928   2
   4  -7  -7 110.099  12.604   4
   3  -7  -7 329.308  21.236   2
   3  -7  -7 354.624  21.494   4
   2  -7  -7 -7.2772  6.9294   2
   2  -7  -7 1.62562 7.61802   4
   1  -7  -7 455.247  25.454   1
   1  -7  -7 515.634  28.159   2
   1  -7  -7 477.371  24.940   4
   0  -7  -7 -5.2728  6.2072   4
   0  -7  -7 9.62258 7.19218   2
   0  -7  -7 3.26254 5.88691   1
  -1  -7  -7 360.712  23.315   2
  -1  -7  -7 325.734  22.702   1
  -2  -7  -7 -2.6980  8.1323   2
  -2  -7  -7 -0.8617  7.2870   1
  -3  -7  -7 32.3828  9.6631   1
   5  -8  -7 31.0246  7.6326   2
   5  -8  -7 26.1557 10.0169   4
   4  -8  -7 -3.2088  7.1342   2
   4  -8  -7 55.5684 11.5202   4
   3  -8  -7 121.458  13.744   4
   3  -8  -7 97.7209 11.2369   2
   2  -8  -7 8.00426 8.65246   4
   2  -8  -7 -5.2840  8.1999   2
   1  -8  -7 25.6079  8.7044   4
   1  -8  -7 25.3582  8.5546   2
   0  -8  -7 2.73992 8.07937   2
   0  -8  -7 9.49095 7.19236   4
  -1  -8  -7 7.95109 8.61435   2
  -1  -8  -7 8.40931 7.52308   1
  -2  -8  -7 59.8855 12.0153   2
  -2  -8  -7 59.0647 11.0105   1
  -2  -9   8 117.473  13.884   2
  -1  -9   8 20.8525  8.5645   2
   0  -9   8 106.488  11.357   2
   1  -9   8 37.3369  7.3667   2
   2  -9   8 30.7178 14.5242   3
   3  -9   8 107.531  19.328   3
  -3  -8   8 10.2683  7.3212   1
  -3  -8   8 -5.7624  9.5354   2
  -2  -8   8 16.9057  9.0966   2
  -2  -8   8 14.5549  6.6526   1
  -1  -8   8 52.0629  9.3237   2
  -1  -8   8 56.8331  7.2549   1
   0  -8   8 84.5973  9.8000   2
   1  -8   8 90.2703 17.2903   3
   2  -8   8 112.329  18.567   3
   3  -8   8 71.9058 15.8723   3
   4  -8   8 18.1662 13.0529   3
   5  -8   8 19.9796 13.1629   3
  -4  -7   8 26.5989  9.7671   1
  -3  -7   8 32.0912  9.8456   2
  -3  -7   8 27.1322  8.8347   1
  -2  -7   8 345.878  20.978   1
  -2  -7   8 325.474  22.446   2
  -1  -7   8 37.8446  6.9712   1
  -1  -7   8 38.4466  7.8781   2
   0  -7   8 278.192  15.623   1
   0  -7   8 258.598  26.735   3
   1  -7   8 131.587  18.547   3
   2  -7   8 201.002  22.278   3
   3  -7   8 479.476  38.078   3
   4  -7   8 13.4598 11.5240   3
   5  -7   8 289.446  30.132   3
   6  -7   8 0.04748 6.31602   2
   6  -7   8  3.6437 13.5486   3
  -5  -6   8 4.35514 9.70441   1
  -4  -6   8 198.713  17.712   1
  -3  -6   8 -2.6122  7.2992   2
  -3  -6   8 1.21091 6.89342   1
  -2  -6   8 9.24355 6.11436   1
  -2  -6   8 2.07634 6.40803   2
  -1  -6   8 79.8176 14.2335   3
  -1  -6   8 79.7833  8.1557   1
   0  -6   8 33.3797 11.0619   3
   0  -6   8 37.8129  5.4695   1
   1  -6   8 374.009  18.797   1
   1  -6   8 364.701  30.551   3
   2  -6   8 110.304  15.406   3
   3  -6   8 466.898  38.021   3
   3  -6   8 510.398  23.573   4
   4  -6   8 83.2933 15.6614   3
   4  -6   8 81.5661  7.5217   2
   5  -6   8 152.286  21.027   3
   5  -6   8 144.053  11.555   2
   6  -6   8 43.2090 15.8272   3
   6  -6   8 27.9702  7.1892   2
   7  -6   8 12.4829  7.2817   2
  -6  -5   8 14.7957 10.4521   1
  -5  -5   8 10.4105  9.1658   1
  -4  -5   8 66.2260 10.6618   1
  -3  -5   8 338.183  21.763   2
  -3  -5   8 323.746  20.876   1
  -2  -5   8 777.722  39.232   1
  -1  -5   8 2.44000 7.52451   3
  -1  -5   8 -1.7269  4.1692   1
   0  -5   8 812.896  55.163   3
   0  -5   8 799.064  38.690   1
   1  -5   8 63.8853  5.7841   1
   1  -5   8 76.7827 12.0842   3
   2  -5   8 451.602  22.337   1
   2  -5   8 465.770  34.870   3
   3  -5   8 527.089  27.183   2
   3  -5   8 492.326  39.941   3
   3  -5   8 581.555  26.364   1
   4  -5   8 60.4291  6.6083   2
   4  -5   8 48.4277 13.1721   3
   4  -5   8 59.5553  6.9578   1
   5  -5   8 123.558  10.536   2
   5  -5   8 83.6115 17.2566   3
   6  -5   8 28.7981 14.7740   3
   7  -5   8 11.6121 13.8492   3
   7  -5   8 48.2898  8.7590   2
  -7  -4   8 14.6332 11.2977   1
  -6  -4   8 272.328  22.288   1
  -5  -4   8 84.5586 12.2916   1
  -4  -4   8 214.125  16.933   1
  -3  -4   8 11.9407  5.8892   2
  -3  -4   8 6.12824 5.93176   1
  -2  -4   8 84.0258  8.3371   1
  -1  -4   8 686.990  46.644   3
  -1  -4   8 673.590  33.706   1
   0  -4   8 7.30136 6.57228   3
   0  -4   8 11.0158  3.7706   1
   1  -4   8 2713.61  169.85   3
   1  -4   8 2763.76  124.84   1
   2  -4   8 75.2586  6.6093   1
   2  -4   8 57.0120 10.8058   3
   3  -4   8 1750.59   79.36   1
   3  -4   8 1670.07   81.20   2
   4  -4   8 15.8176 10.3229   3
   4  -4   8 23.3270  5.0388   2
   5  -4   8 326.051  30.445   3
   5  -4   8 306.817  18.754   2
   6  -4   8 135.606  20.988   3
   6  -4   8 99.6539 10.3189   2
   7  -4   8 44.0605 16.3727   3
   7  -4   8 39.1853  8.6240   2
   8  -4   8 -4.2222 12.8825   3
   8  -4   8 0.04569 8.23172   2
  -7  -3   8 -12.454   9.135   1
   6   3  -8 97.7448 12.4644   1
  -6  -3   8 107.250  13.991   1
   5   3  -8 111.568  11.374   1
  -5  -3   8 110.444  12.730   1
   4   3  -8 375.378  22.042   1
  -4  -3   8 375.859  22.856   1
   3   3  -8 59.1209  6.7292   1
  -3  -3   8 54.1331  7.4960   1
  -3  -3   8 55.5544  7.3706   2
   2   3  -8 927.095  46.058   1
  -2  -3   8 990.397  62.657   3
  -2  -3   8 973.411  46.784   1
   1   3  -8 94.5974  7.5946   1
  -1  -3   8 100.713   8.591   1
  -1  -3   8 95.5776 11.8532   3
   0   3  -8 1156.46   54.73   1
   0  -3   8 1225.92   75.39   3
   0  -3   8 1155.17   55.21   1
   1  -3   8 -0.6162  5.4468   3
   1  -3   8 8.07820 4.09633   1
   2  -3   8 182.931  10.647   2
   2  -3   8 173.496  11.538   1
   2  -3   8 142.495  16.343   3
   3  -3   8 108.465  13.951   3
   3  -3   8 89.9991  8.0508   2
   4  -3   8 361.845  30.581   3
   4  -3   8 342.786  19.567   2
   5  -3   8 90.2061 17.7865   3
   5  -3   8 86.8045  8.5835   2
   6  -3   8 483.088  28.461   2
   6  -3   8 559.719  44.364   3
   7  -3   8 54.4904 17.2816   3
   7  -3   8 57.8704  9.7077   2
   8  -3   8 -2.9666 12.9284   3
   8   2  -8 35.2232 11.3860   1
   7   2  -8 57.1806 11.4156   1
   6   2  -8 215.326  17.227   1
  -6  -2   8 222.909  18.846   1
   5   2  -8 301.482  19.326   1
  -5  -2   8 293.044  20.402   1
   4   2  -8 324.419  19.721   1
  -4  -2   8 338.373  20.446   1
   3   2  -8 115.290   9.445   1
  -3  -2   8 109.150  10.559   1
   2   2  -8 1315.03   61.97   1
  -2  -2   8 1291.30   62.31   1
  -2  -2   8 1349.66   82.87   3
   1   2  -8 3603.85  164.49   1
  -1  -2   8 3552.76  164.77   1
  -1  -2   8 3704.36  220.73   3
   0   2  -8 918.216  43.084   1
   0  -2   8 909.935  43.628   1
   0  -2   8 900.803  58.566   3
  -1   2  -8 3603.24  161.47   1
   1  -2   8 3324.04  217.31   3
   1  -2   8 3736.99  161.93   1
  -2   2  -8 162.422  11.184   1
   2  -2   8 164.506  10.583   2
   2  -2   8 181.081  16.374   3
   3  -2   8 2140.59  105.15   2
   3  -2   8 2314.16  140.24   3
   4  -2   8 19.0506 11.4463   3
   4  -2   8 14.7715  4.7725   2
   5  -2   8 16.1978  5.7816   2
   5  -2   8 30.8488 14.2136   3
   6  -2   8 1.86549 6.24750   2
   6  -2   8 -3.0437 12.7404   3
   7  -2   8 81.7772 19.7811   3
   8  -2   8 24.5814 15.6477   3
   8   1  -8 160.907  16.879   1
   7   1  -8 4.91401 8.07510   1
   6   1  -8 42.4936  8.6119   1
   5   1  -8 7.74405 5.72255   1
  -5  -1   8 9.95791 6.79734   1
   4   1  -8 464.381  25.093   1
  -4  -1   8 458.793  25.452   1
   3   1  -8 81.6030  7.4743   1
  -3  -1   8 79.2529  8.0361   1
   2   1  -8 1277.30   59.72   1
  -2  -1   8 1244.11   59.90   1
  -2  -1   8 1289.00   79.00   3
   1   1  -8 1588.78   74.59   1
  -1  -1   8 1563.92   74.91   1
  -1  -1   8 1677.92   99.41   3
   0   1  -8 5.38421 2.89359   1
   0  -1   8 6.78210 4.24852   3
   0  -1   8 8.06913 4.04867   1
  -1   1  -8 578.753  28.695   1
   1  -1   8 571.047  38.428   3
  -2   1  -8 381.813  20.827   1
   2  -1   8 416.073  21.117   2
   2  -1   8 406.431  30.284   3
  -3   1  -8 119.573   9.451   1
   3  -1   8 94.0423 15.9353   3
   3  -1   8 130.782   9.585   2
   4  -1   8 575.896  47.749   3
   4  -1   8 682.800  33.131   2
   5  -1   8 112.595  10.825   1
   5  -1   8 129.864  11.382   2
   5  -1   8 105.661  19.493   3
   6  -1   8 44.3686 17.1255   3
   6  -1   8 61.6508  9.2936   1
   7  -1   8 124.520  13.417   1
   7  -1   8 131.572  24.492   3
   8  -1   8  6.6603 15.6065   3
   8   0  -8 30.2304 10.2840   1
   7   0  -8 227.800  18.213   1
   6   0  -8 209.076  16.281   1
   5   0  -8 96.3429  9.4904   1
  -5   0   8 72.4578  9.6099   1
   4   0  -8 1532.76   71.96   2
   4   0  -8 1452.41   70.24   1
  -4   0   8 1455.13   70.30   1
   3   0  -8 101.443   8.805   2
   3   0  -8 100.736   8.682   1
  -3   0   8 95.1185  9.1549   1
   2   0  -8 1678.47   78.84   2
   2   0  -8 1587.28   76.60   1
  -2   0   8 1684.16   76.83   1
   1   0  -8 3248.97  156.68   1
  -1   0   8 3549.05  208.44   3
  -1   0   8 3518.12  157.08   1
   0   0  -8 561.090  27.900   1
   0   0   8 533.003  28.020   1
   0   0   8 585.291  36.496   3
  -1   0  -8 2485.40  106.54   1
   1   0   8 2128.64  142.42   3
  -2   0  -8 717.587  35.272   1
   2   0   8 718.176  35.736   2
  -3   0  -8 585.670  29.964   1
   3   0   8 586.369  30.266   2
  -4   0  -8 151.449  11.889   1
   4   0   8 138.067  12.007   1
   5   0   8 -5.6390  5.4217   1
   6   0   8 -7.3307  6.0634   1
   7   0   8 3.95861 8.12152   1
   7   0   8 -7.4178 14.6186   3
   8   0   8 67.9044 21.7486   3
   8  -1  -8 159.521  16.137   1
   7  -1  -8 26.1463  8.5003   1
   6  -1  -8 10.4714  6.6041   1
   5  -1  -8 109.266  10.259   1
   5  -1  -8 126.175  11.843   2
   4  -1  -8 41.0446  6.2471   1
   4  -1  -8 49.8915  6.6051   2
   3  -1  -8 1172.89   57.33   1
   3  -1  -8 1284.49   59.14   2
  -3   1   8 1171.41   57.34   1
   2  -1  -8 247.276  14.523   1
  -2   1   8 253.848  14.869   1
   1  -1  -8 4283.00  188.98   2
   1  -1  -8 3771.56  183.33   1
   0  -1  -8 981.082  43.392   1
   0  -1  -8 766.470  43.700   2
   0   1   8 971.598  43.176   1
   0   1   8 846.065  56.104   3
  -1  -1  -8 3144.46  143.81   1
  -2  -1  -8 425.287  22.649   1
  -3  -1  -8 2.66097 4.17835   1
  -4  -1  -8 279.054  18.225   1
   4   1   8 302.829  18.505   1
  -5  -1  -8 391.208  24.057   1
   5   1   8 414.257  24.199   1
   6   1   8 53.5826  9.8427   1
   7   1   8 145.583  15.424   1
   8  -2  -8 -5.0351  8.2986   1
   7  -2  -8 16.7180  7.9516   1
   6  -2  -8 418.768  25.293   1
   6  -2  -8 444.166  26.087   2
   5  -2  -8 88.9826  9.2841   2
   5  -2  -8 64.2190  8.2974   1
   4  -2  -8 830.886  42.885   1
   4  -2  -8 917.199  44.350   2
   3  -2  -8 460.137  23.713   1
   3  -2  -8 443.613  24.564   2
   2  -2  -8 460.530  23.985   2
   2  -2  -8 424.751  23.353   1
  -2   2   8 452.635  23.496   1
   1  -2  -8 624.971  29.612   1
   1  -2  -8 549.030  30.276   2
  -1   2   8 576.418  29.893   1
   0  -2  -8 378.429  18.875   2
   0  -2  -8 280.163  19.029   1
  -1  -2  -8 582.905  29.564   2
  -1  -2  -8 553.834  28.975   1
  -2  -2  -8 987.852  49.397   2
  -2  -2  -8 998.343  48.379   1
  -3  -2  -8 68.6288  8.0422   1
  -4  -2  -8 97.1248 10.1138   1
   4   2   8 102.067  10.318   1
  -5  -2  -8 150.190  13.776   1
   5   2   8 137.189  13.114   1
  -6  -2  -8 54.9779  9.9742   1
   6   2   8 58.0558 10.7833   1
   8  -3  -8 45.6550 10.3297   1
   7  -3  -8 1.97544 6.82884   1
   7  -3  -8 -5.4178  7.6755   2
   6  -3  -8 181.950  15.407   2
   6  -3  -8 169.318  14.368   1
   5  -3  -8 92.3672  9.4880   1
   5  -3  -8 94.8105  9.9923   2
   4  -3  -8 34.3435  6.4972   2
   4  -3  -8 26.7917  5.8347   1
   3  -3  -8 1928.11   99.45   2
   3  -3  -8 2232.29   96.55   1
   2  -3  -8 385.439  19.493   2
   2  -3  -8 286.605  18.424   1
   1  -3  -8 2753.44  124.35   1
   1  -3  -8 2647.98  128.20   2
   0  -3  -8 90.7882  9.2983   1
   0  -3  -8 110.552   9.171   2
  -1  -3  -8 727.291  36.705   2
  -1  -3  -8 698.666  35.897   1
  -2  -3  -8 173.098  13.486   2
  -2  -3  -8 185.578  13.261   1
  -3  -3  -8 120.012  10.952   1
  -4  -3  -8 59.7048  8.9577   1
  -5  -3  -8 143.005  13.707   1
  -6  -3  -8 61.6719 10.9733   1
   8  -4  -8 27.9357 10.4913   2
   8  -4  -8 36.7337  8.9337   1
   7  -4  -8 25.5573  7.8187   1
   7  -4  -8 36.0971  8.9696   2
   6  -4  -8 307.154  19.038   4
   6  -4  -8 345.672  22.013   2
   6  -4  -8 334.822  20.181   1
   5  -4  -8 74.2597  8.4529   1
   5  -4  -8 87.0833  9.8702   2
   4  -4  -8 314.497  17.964   1
   4  -4  -8 288.116  19.098   2
   3  -4  -8 164.432  11.328   1
   3  -4  -8 155.075  12.670   2
   2  -4  -8 -6.8315  3.7502   1
   2  -4  -8 6.05344 5.32920   2
   1  -4  -8 1.53462 4.66395   2
   1  -4  -8 7.31487 4.55172   1
   0  -4  -8 459.223  24.739   2
   0  -4  -8 382.307  24.952   1
   0  -4  -8 488.588  21.338   4
  -1  -4  -8 80.6903  8.6235   1
  -1  -4  -8 74.1679  6.5822   4
  -1  -4  -8 74.6778  8.4342   2
  -2  -4  -8 271.013  18.298   2
  -2  -4  -8 274.572  17.824   1
  -3  -4  -8 215.239  16.217   1
  -4  -4  -8 24.2157  7.8140   1
  -5  -4  -8 72.2263 10.9870   1
  -6  -4  -8 103.368  13.542   1
   7  -5  -8 0.41468 5.87721   1
   7  -5  -8 -3.7718  7.6542   2
   7  -5  -8 7.98069 7.71419   4
   6  -5  -8 173.460  12.535   1
   6  -5  -8 182.139  16.794   2
   6  -5  -8 140.735  12.899   4
   5  -5  -8 524.205  27.155   1
   5  -5  -8 495.904  26.410   4
   5  -5  -8 524.946  29.387   2
   4  -5  -8 65.1919  9.2917   4
   4  -5  -8 74.1608  7.6103   1
   3  -5  -8 970.539  46.916   2
   3  -5  -8 858.315  43.963   1
   2  -5  -8 7.94575 4.72437   1
   2  -5  -8 6.94267 6.41533   2
   2  -5  -8 9.42361 6.58126   4
   1  -5  -8 1081.43   54.89   2
   1  -5  -8 1113.65   47.44   4
   1  -5  -8 1098.79   53.12   1
   0  -5  -8 19.3823  6.0325   2
   0  -5  -8 1.54548 5.98251   1
   0  -5  -8 20.1049  5.5328   4
  -1  -5  -8 128.933  12.640   2
  -1  -5  -8 116.013  11.320   1
  -1  -5  -8 131.358   9.865   4
  -2  -5  -8 -3.2869  5.9867   1
  -2  -5  -8 1.13250 6.68565   2
  -3  -5  -8 -5.3833  6.4456   1
  -4  -5  -8 71.8948 11.1324   1
  -5  -5  -8 46.2877 10.4332   1
   7  -6  -8 60.6265 10.3587   2
   7  -6  -8 53.0156 10.0002   4
   6  -6  -8 74.2333 10.9660   2
   6  -6  -8 62.1749 10.3207   4
   5  -6  -8 217.639  17.048   4
   5  -6  -8 230.251  17.209   2
   4  -6  -8 -11.477   6.718   2
   4  -6  -8 2.01661 7.84015   4
   3  -6  -8 302.279  20.060   4
   3  -6  -8 300.959  17.368   1
   3  -6  -8 332.023  20.319   2
   2  -6  -8 40.2670  9.0512   2
   2  -6  -8 54.9574  6.7139   1
   2  -6  -8 68.8902  9.6255   4
   1  -6  -8 -3.1503  5.8885   4
   1  -6  -8 -4.0801  5.9625   2
   1  -6  -8 -2.0166  5.0537   1
   0  -6  -8 296.873  20.083   2
   0  -6  -8 290.722  19.680   1
   0  -6  -8 318.328  17.472   4
  -1  -6  -8 51.9399  9.3689   2
  -1  -6  -8 80.8689 10.4384   1
  -2  -6  -8 144.466  14.011   2
  -2  -6  -8 136.748  13.438   1
  -3  -6  -8 214.311  18.017   1
  -4  -6  -8 -2.1530  8.0584   1
   6  -7  -8 72.4846 10.6245   2
   6  -7  -8 58.9923 10.9438   4
   5  -7  -8 107.480  11.358   2
   5  -7  -8 105.060  12.770   4
   4  -7  -8 -5.4273  7.2385   2
   4  -7  -8 2.16337 8.86001   4
   3  -7  -8 205.466  16.458   2
   3  -7  -8 211.755  16.709   4
   2  -7  -8 17.2298  8.7481   2
   2  -7  -8 38.7685  9.3250   4
   1  -7  -8 193.779  16.686   2
   1  -7  -8 198.578  14.236   1
   1  -7  -8 215.247  15.631   4
   0  -7  -8 21.5774  6.9246   1
   0  -7  -8 17.3039  7.1421   4
   0  -7  -8 10.6260  7.7692   2
  -1  -7  -8 49.8950 10.1271   1
  -1  -7  -8 40.3314  9.6061   2
  -2  -7  -8 23.2417  9.2826   1
  -2  -7  -8 17.9250  9.3534   2
  -3  -7  -8 3.26509 8.49363   1
   4  -8  -8 -11.066   7.196   2
   4  -8  -8 -3.8952  9.5727   4
   3  -8  -8 131.123  13.370   2
   3  -8  -8 146.681  15.175   4
   2  -8  -8 59.4395 11.5260   2
   2  -8  -8 83.6829 12.1319   4
   1  -8  -8 14.1783  9.0319   2
   1  -8  -8 13.9737  8.3037   4
   0  -8  -8 30.8469  9.8770   2
   0  -8  -8 46.7059  8.9162   4
  -1  -8  -8 41.6395 11.0537   2
  -1  -8  -8 49.7573  9.1328   1
  -1  -9   9 6.48764 8.01073   2
   0  -9   9 48.2253  9.0521   2
   1  -9   9 155.500  13.071   2
   2  -9   9 0.99998 5.42956   2
   2  -9   9 -9.6763 11.6451   3
   3  -9   9 174.370  23.911   3
   4  -9   9  6.7658 13.7554   3
  -3  -8   9 42.5371  9.2970   1
  -3  -8   9 37.7786 11.5134   2
  -2  -8   9 -0.4302  8.3457   2
  -2  -8   9 11.3228  6.7497   1
  -1  -8   9 283.219  20.614   2
  -1  -8   9 319.082  18.390   1
   0  -8   9 11.2525  6.8990   2
   1  -8   9 195.499  24.292   3
   2  -8   9 20.1297 13.1180   3
   3  -8   9 163.726  21.964   3
   4  -8   9 29.8221 14.4235   3
   5  -8   9  5.2900 13.3343   3
  -4  -7   9 67.1576 11.9503   1
  -3  -7   9 41.7231  9.7405   1
  -3  -7   9 20.5959  9.8073   2
  -2  -7   9 233.485  16.868   1
  -2  -7   9 243.938  18.725   2
  -1  -7   9 1.87475 6.79717   2
  -1  -7   9 0.77536 5.48099   1
   0  -7   9 28.5639  5.5338   1
   0  -7   9 14.7120 11.8659   3
   1  -7   9 157.903  20.351   3
   2  -7   9 10.7644 11.0036   3
   3  -7   9 54.6877 14.3053   3
   4  -7   9 133.772  20.728   3
   5  -7   9 52.4725 16.6180   3
   6  -7   9  7.1252 14.7617   3
  -5  -6   9 0.73454 9.49046   1
  -4  -6   9 110.723  13.584   1
  -3  -6   9 201.645  16.956   1
  -3  -6   9 230.422  18.374   2
  -2  -6   9 9.14464 6.29687   1
  -2  -6   9 8.42154 6.91972   2
  -1  -6   9 762.303  38.420   1
  -1  -6   9 785.916  55.234   3
   0  -6   9 26.2316  5.4156   1
   0  -6   9 32.0494 11.2664   3
   1  -6   9 1307.09   60.59   1
   2  -6   9 6.91577 9.22521   3
   3  -6   9 164.878  20.412   3
   4  -6   9 90.1851 16.8302   3
   5  -6   9 -7.3084 11.5332   3
   5  -6   9 4.35929 5.77179   2
   6  -6   9 -7.2095 12.4127   3
   6  -6   9 7.57046 6.55718   2
   7  -6   9 98.0389 10.6001   2
   7  -6   9 49.8418 17.9672   3
  -6  -5   9 12.3801 10.7314   1
  -5  -5   9 49.9385 11.3950   1
  -4  -5   9 221.961  18.064   1
  -3  -5   9 297.538  20.018   1
  -3  -5   9 313.492  21.114   2
  -2  -5   9 260.665  17.120   1
  -1  -5   9 12.3313  5.0927   1
  -1  -5   9 12.8120  9.1441   3
   0  -5   9 12.0311  8.3729   3
   0  -5   9 19.9525  4.8037   1
   1  -5   9 17.3201  4.0525   1
   1  -5   9 6.43482 7.97545   3
   2  -5   9 308.255  16.221   1
   2  -5   9 288.668  26.475   3
   3  -5   9 164.342  20.646   3
   3  -5   9 221.344  12.473   1
   4  -5   9 416.246  23.330   2
   4  -5   9 448.350  23.412   1
   5  -5   9 47.4099  7.5300   2
   5  -5   9 30.3593 14.0094   3
   5  -5   9 66.1448  8.6953   1
   6  -5   9 11.4489 13.0791   3
   6  -5   9 0.15292 6.33799   2
   7  -5   9 126.202  22.068   3
   7  -5   9 110.076  11.936   2
  -7  -4   9 53.5671 13.6814   1
  -6  -4   9 141.557  16.329   1
  -5  -4   9 1.37074 8.45701   1
  -4  -4   9 161.496  15.269   1
  -3  -4   9 729.795  38.598   1
  -3  -4   9 763.883  39.726   2
  -2  -4   9 119.436  11.130   1
  -2  -4   9 117.642  14.564   3
  -1  -4   9 1994.14  123.44   3
  -1  -4   9 1924.02   90.94   1
   0  -4   9 20.5512  4.4604   1
   0  -4   9 24.6192  8.3140   3
   1  -4   9 1250.47   57.89   1
   1  -4   9 1211.92   79.90   3
   2  -4   9 -2.2969  6.7435   3
   2  -4   9 -6.4223  3.9366   1
   3  -4   9 85.5289 14.2845   3
   3  -4   9 113.739   9.058   2
   3  -4   9 125.930   9.963   1
   4  -4   9 13.1287  5.1447   2
   4  -4   9 30.5353 11.7511   3
   5  -4   9 142.078  21.204   3
   5  -4   9 131.191  11.648   2
   6  -4   9 61.5293  8.8934   2
   6  -4   9 79.3365 18.6301   3
   7  -4   9 135.381  13.202   2
   7  -4   9 151.650  23.835   3
  -7  -3   9  9.7229 11.3606   1
   6   3  -9 3.86168 7.47929   1
  -6  -3   9 1.77267 9.34208   1
   5   3  -9 187.157  15.366   1
  -5  -3   9 177.341  16.686   1
   4   3  -9 242.927  16.555   1
  -4  -3   9 252.258  17.946   1
   3   3  -9 723.969  36.723   1
  -3  -3   9 739.960  37.640   1
   2   3  -9 50.7731  5.9296   1
  -2  -3   9 41.3613  6.6011   1
  -2  -3   9 55.0501  9.4150   3
   1   3  -9 1158.38   55.04   1
  -1  -3   9 1217.92   75.28   3
  -1  -3   9 1133.67   55.51   1
   0  -3   9 488.803  34.498   3
   0  -3   9 477.912  24.862   1
   1  -3   9 7.82018 4.77996   1
   1  -3   9 14.4497  6.8533   3
   2  -3   9 1314.66   60.33   1
   2  -3   9 1238.10   82.51   3
   3  -3   9 83.5092  8.0727   2
   3  -3   9 89.1305 13.6060   3
   4  -3   9 164.910  12.164   2
   4  -3   9 186.396  21.075   3
   5  -3   9 571.341  43.299   3
   5  -3   9 484.035  27.990   2
   6  -3   9  1.1309 13.3538   3
   6  -3   9 3.82903 6.50946   2
   7  -3   9 122.111  12.863   2
   7  -3   9 147.373  23.469   3
   8  -3   9 113.389  21.416   3
   8   2  -9 63.7434 13.0278   1
   7   2  -9 93.6898 13.2148   1
   6   2  -9 393.253  25.147   1
  -6  -2   9 399.957  26.348   1
   5   2  -9 14.8109  6.6377   1
  -5  -2   9 10.5313  7.5145   1
   4   2  -9 399.252  22.705   1
  -4  -2   9 394.754  23.386   1
   3   2  -9 565.679  29.307   1
  -3  -2   9 569.115  30.084   1
   2   2  -9 199.192  12.605   1
  -2  -2   9 202.953  17.035   3
  -2  -2   9 193.060  13.413   1
   1   2  -9 1289.91   61.77   1
  -1  -2   9 1298.57   62.25   1
  -1  -2   9 1371.23   83.17   3
   0   2  -9 701.901  31.670   1
   0  -2   9 605.143  32.050   1
   0  -2   9 612.898  42.834   3
  -1   2  -9 297.465  16.029   1
   1  -2   9 285.729  16.711   1
   1  -2   9 286.284  22.629   3
  -2   2  -9 448.182  23.338   1
   2  -2   9 432.026  23.063   2
   2  -2   9 451.361  32.485   3
   3  -2   9 0.90186 7.84651   3
   3  -2   9 2.11898 3.78763   2
   4  -2   9  4.6775 10.3462   3
   4  -2   9 0.91392 4.51926   2
   5  -2   9 26.1833  6.5499   2
   5  -2   9 24.6133 13.9937   3
   6  -2   9 234.908  28.424   3
   6  -2   9 222.833  16.713   2
   7  -2   9 -3.0355 13.8937   3
   8  -2   9 159.486  25.031   3
   8   1  -9 30.3965 10.9144   1
   7   1  -9 12.6335  8.3939   1
   6   1  -9 1.62208 6.70041   1
   5   1  -9 992.414  48.927   1
  -5  -1   9 941.617  49.160   1
   4   1  -9 17.8346  5.3578   1
  -4  -1   9 19.6527  6.1941   1
   3   1  -9 2616.80  120.45   1
  -3  -1   9 2596.56  120.62   1
   2   1  -9 434.230  22.949   1
  -2  -1   9 423.334  23.297   1
  -2  -1   9 452.113  29.740   3
   1   1  -9 4833.33  215.20   1
  -1  -1   9 4796.99  287.41   3
  -1  -1   9 4587.05  215.39   1
   0   1  -9 873.603  42.665   1
   0  -1   9 864.007  56.782   3
   0  -1   9 929.275  43.502   1
  -1   1  -9 267.674  15.222   1
   1  -1   9 261.726  20.403   3
  -2   1  -9 186.570  12.742   1
   2  -1   9 194.604  12.222   2
   2  -1   9 195.234  18.433   3
  -3   1  -9 904.501  43.387   1
   3  -1   9 841.533  61.293   3
   3  -1   9 904.916  44.050   2
   4  -1   9 57.3163 14.6193   3
   4  -1   9 63.6999  7.4255   2
   5  -1   9 324.830  35.710   3
   5  -1   9 445.541  23.782   2
   6  -1   9 -7.2191 13.2791   3
   7  -1   9 65.4814 19.9021   3
   8  -1   9  2.0094 16.5306   3
   8   0  -9 175.654  17.225   1
   7   0  -9 80.0335 11.6977   1
   6   0  -9 274.238  19.225   1
   5   0  -9 -0.8204  5.0636   1
   4   0  -9 315.582  19.203   1
  -4   0   9 335.812  19.823   1
   3   0  -9 321.728  18.283   2
   3   0  -9 296.897  17.826   1
  -3   0   9 312.193  18.326   1
   2   0  -9 825.128  41.602   2
   2   0  -9 829.087  40.684   1
  -2   0   9 850.419  52.116   3
  -2   0   9 833.977  40.847   1
   1   0  -9 384.177  22.159   1
  -1   0   9 452.687  28.029   3
  -1   0   9 419.283  22.759   1
   0   0  -9 1814.85   85.77   1
   0   0   9 1889.21  113.97   3
   0   0   9 1849.14   86.18   1
  -1   0  -9 16.6943  4.8203   1
   1   0   9 23.6870  7.1480   3
  -2   0  -9 898.043  43.797   1
   2   0   9 902.679  60.398   3
  -3   0  -9 657.118  33.334   1
   3   0   9 650.769  33.584   2
  -4   0  -9 191.848  14.024   1
   6   0   9 310.228  33.420   3
   7   0   9  1.2911 15.1992   3
   8  -1  -9 135.082  15.230   1
   7  -1  -9 149.587  14.545   1
   6  -1  -9 -0.8548  6.1842   1
   5  -1  -9 945.795  49.089   1
   5  -1  -9 1027.06   50.56   2
   4  -1  -9 178.656  13.399   1
   4  -1  -9 204.422  14.274   2
   3  -1  -9 3334.20  156.09   1
   3  -1  -9 3535.92  161.11   2
  -3   1   9 3352.93  156.05   1
   2  -1  -9 22.2015  4.6721   1
   2  -1  -9 20.5729  4.6330   2
  -2   1   9 20.6997  5.0264   1
   1  -1  -9 975.404  46.263   1
   1  -1  -9 977.671  46.797   2
  -1   1   9 860.121  46.189   1
  -1   1   9 983.852  58.945   3
   0  -1  -9 246.646  15.422   2
   0  -1  -9 267.562  15.121   1
   0   1   9 241.287  18.785   3
   0   1   9 238.395  15.400   1
  -1  -1  -9 571.391  29.698   2
  -1  -1  -9 563.713  29.292   1
  -2  -1  -9 45.4329  6.3131   1
  -3  -1  -9 805.423  40.514   1
  -4  -1  -9 189.778  14.396   1
  -5  -1  -9 256.891  18.126   1
   7   1   9 -14.983  14.383   3
   8  -2  -9 78.3609 12.4210   1
   7  -2  -9 87.7955 11.5881   1
   6  -2  -9 111.438  11.781   2
   6  -2  -9 88.7285 10.9167   1
   5  -2  -9 227.535  16.894   2
   5  -2  -9 221.079  15.820   1
   4  -2  -9 89.9299  9.0649   1
   4  -2  -9 107.808   9.542   2
   3  -2  -9 131.515   9.797   1
   3  -2  -9 89.1664  8.8372   2
   2  -2  -9 739.119  41.448   1
   2  -2  -9 961.337  42.924   2
   1  -2  -9 22.3462  5.0013   1
   1  -2  -9 24.3117  5.2143   2
  -1   2   9 29.5038  6.4077   1
   0  -2  -9 1440.90   68.50   2
   0  -2  -9 1369.35   67.21   1
  -1  -2  -9 722.066  36.344   2
  -1  -2  -9 694.592  35.816   1
  -2  -2  -9 60.2801  7.4087   1
  -3  -2  -9 172.150  13.295   1
  -4  -2  -9 370.922  22.663   1
  -5  -2  -9 121.374  12.410   1
   8  -3  -9 90.2754 12.4911   1
   7  -3  -9 145.963  14.458   2
   7  -3  -9 162.890  14.722   1
   6  -3  -9 161.177  14.087   1
   6  -3  -9 152.623  15.341   2
   5  -3  -9 788.027  42.194   1
   5  -3  -9 885.193  44.177   2
   4  -3  -9 61.5764  7.7442   1
   4  -3  -9 61.1426  8.1448   2
   3  -3  -9 770.337  39.081   2
   3  -3  -9 736.353  37.607   1
   2  -3  -9 37.4650  5.7922   2
   2  -3  -9 5.47369 4.92970   1
   1  -3  -9 131.146  11.841   2
   1  -3  -9 149.326  11.248   1
   0  -3  -9 77.5178  7.5057   2
   0  -3  -9 49.8660  7.8265   1
  -1  -3  -9 25.3210  5.6967   2
  -1  -3  -9 17.9300  5.4216   1
  -2  -3  -9 114.584  11.051   1
  -3  -3  -9 171.484  14.102   1
  -4  -3  -9 385.676  23.802   1
  -5  -3  -9 -1.6171  6.8766   1
  -6  -3  -9 125.754  14.208   1
   8  -4  -9 24.3909 10.9233   2
   7  -4  -9 266.290  20.619   2
   7  -4  -9 270.766  18.522   1
   6  -4  -9 1.21856 7.83697   2
   6  -4  -9 4.24622 6.76937   4
   6  -4  -9 4.34176 6.31604   1
   5  -4  -9 859.876  43.502   1
   5  -4  -9 871.656  45.499   2
   4  -4  -9 94.3163 10.2292   2
   3  -4  -9 89.6248  8.5346   1
   3  -4  -9 96.5584  9.4677   2
   2  -4  -9 247.739  15.984   1
   1  -4  -9 81.0893  8.9930   2
   1  -4  -9 88.2498  8.6274   1
   0  -4  -9 480.265  24.715   2
   0  -4  -9 367.177  24.687   1
  -1  -4  -9 441.474  25.181   1
  -1  -4  -9 434.556  25.389   2
  -1  -4  -9 441.647  20.693   4
  -2  -4  -9 6.26621 6.12791   2
  -2  -4  -9 -3.9851  5.3300   1
  -3  -4  -9 304.912  20.233   1
  -4  -4  -9 12.2135  7.4143   1
  -5  -4  -9 6.32112 7.69154   1
  -6  -4  -9 98.9125 13.8057   1
   7  -5  -9 65.3895  8.8336   1
   7  -5  -9 58.0341 10.8944   2
   7  -5  -9 66.1153 10.1876   4
   6  -5  -9 4.00473 5.86705   1
   6  -5  -9 13.0624  9.0975   2
   6  -5  -9 3.17717 7.24380   4
   5  -5  -9 182.799  15.216   2
   5  -5  -9 140.658  13.034   4
   5  -5  -9 170.985  12.785   1
   4  -5  -9 175.540  13.853   4
   4  -5  -9 201.579  13.254   1
   4  -5  -9 135.893  13.491   2
   3  -5  -9 210.274  14.607   1
   3  -5  -9 228.225  16.512   4
   3  -5  -9 258.117  17.130   2
   2  -5  -9 247.314  16.516   2
   2  -5  -9 150.289  13.142   1
   1  -5  -9 112.107  10.996   2
   1  -5  -9 119.866  10.320   4
   1  -5  -9 122.230  10.968   1
   0  -5  -9 6.27220 5.39316   4
   0  -5  -9 1.46039 5.88186   2
   0  -5  -9 3.29003 6.20361   1
  -1  -5  -9 3.09610 6.33884   2
  -1  -5  -9 0.44059 4.70819   4
  -1  -5  -9 -6.3027  5.8454   1
  -2  -5  -9 239.865  18.240   1
  -2  -5  -9 267.859  19.083   2
  -3  -5  -9 5.38857 7.27738   1
  -4  -5  -9 341.250  23.526   1
  -5  -5  -9 -4.6531  8.0504   1
   6  -6  -9 -1.6698  7.8650   4
   6  -6  -9 17.2097  8.6878   2
   5  -6  -9 156.991  15.055   2
   5  -6  -9 152.066  14.152   4
   4  -6  -9 77.7431 10.8701   2
   4  -6  -9 80.3101 11.2700   4
   3  -6  -9 34.7619  9.6149   4
   3  -6  -9 40.4876  6.4690   1
   3  -6  -9 62.4642  9.4919   2
   2  -6  -9 109.942  11.620   4
   2  -6  -9 83.1159 11.4485   2
   1  -6  -9 260.982  17.309   4
   1  -6  -9 275.176  19.368   2
   1  -6  -9 258.076  17.287   1
   0  -6  -9 151.636  14.813   2
   0  -6  -9 150.191  13.487   1
   0  -6  -9 161.873  12.753   4
  -1  -6  -9 93.2834 12.6857   1
  -1  -6  -9 122.081  12.486   2
  -2  -6  -9 43.6730 10.1663   2
  -2  -6  -9 57.3570 10.3872   1
  -3  -6  -9 67.7913 11.4773   1
  -4  -6  -9 -3.8914  8.1464   1
   5  -7  -9 19.4277  8.2589   2
   5  -7  -9 15.8305  9.7117   4
   4  -7  -9 102.311  12.636   2
   4  -7  -9 124.741  14.276   4
   3  -7  -9 27.4303  8.8259   2
   3  -7  -9 19.3893  9.9242   4
   2  -7  -9 45.1017 10.1923   2
   2  -7  -9 31.6391  9.7780   4
   1  -7  -9 79.1903 10.6772   4
   1  -7  -9 84.0443 11.9390   2
   1  -7  -9 84.5822  9.4853   1
   0  -7  -9 24.9972  7.3673   1
   0  -7  -9 28.1777  9.1310   2
   0  -7  -9 35.9492  8.0262   4
  -1  -7  -9 3.28672 8.16003   1
  -1  -7  -9 4.87598 8.68800   2
  -2  -7  -9 134.760  15.625   1
  -2  -7  -9 155.259  16.007   2
   4  -8  -9 -12.975   9.765   4
   4  -8  -9 -6.8527  7.8996   2
   3  -8  -9 5.01927 9.97484   4
   3  -8  -9 1.17032 8.30347   2
   2  -8  -9 50.7669 11.2051   4
   2  -8  -9 68.0984 11.4669   2
   1  -8  -9 15.5564  8.8073   4
   1  -8  -9 16.8050  9.9143   2
   0  -8  -9 67.9548 12.0375   2
  -1  -8  -9 30.9011 11.1058   2
  -1  -8  -9 24.9312  8.2097   1
  -1  -9  10 11.7682  8.6904   2
   0  -9  10 2.88884 7.37222   2
   1  -9  10 72.2043  9.2483   2
   2  -9  10 52.5054 17.0955   3
   3  -9  10 49.1779 17.2304   3
  -3  -8  10 172.798  17.650   2
  -3  -8  10 171.206  15.385   1
  -2  -8  10 -4.1846  8.4137   2
  -2  -8  10 3.92896 6.80002   1
  -1  -8  10 472.856  24.602   1
  -1  -8  10 407.956  26.954   2
   0  -8  10 16.7722 13.5285   3
   1  -8  10 64.2688 16.8852   3
   2  -8  10 19.3632 13.2581   3
   3  -8  10 11.7508 13.2169   3
   4  -8  10 56.8484 16.6502   3
   5  -8  10 79.6174 19.0225   3
  -4  -7  10 0.60801 9.28428   1
  -3  -7  10 48.7833 10.4466   1
  -3  -7  10 58.0432 11.5803   2
  -2  -7  10 -1.9977  6.5643   1
  -2  -7  10 -0.1480  7.9881   2
  -1  -7  10 7.60938 5.97418   1
   0  -7  10 197.629  24.392   3
   0  -7  10 214.363  13.556   1
   1  -7  10 79.7272 16.1708   3
   2  -7  10 91.0927 17.0061   3
   3  -7  10 52.3901 14.8576   3
   4  -7  10  4.4584 13.1619   3
   5  -7  10 111.281  20.651   3
   6  -7  10 65.9037 19.0204   3
  -5  -6  10 72.3948 13.2965   1
  -4  -6  10 8.33214 9.19409   1
  -3  -6  10 465.852  28.218   1
  -3  -6  10 505.412  30.076   2
  -2  -6  10 33.2814  7.7477   1
  -2  -6  10 27.1828  7.9926   2
  -1  -6  10 443.321  35.301   3
  -1  -6  10 395.556  23.018   1
   0  -6  10 24.0020 10.9046   3
   0  -6  10 25.6564  5.5931   1
   1  -6  10 207.891  12.857   1
   1  -6  10 220.753  23.281   3
   2  -6  10 5.30822 3.80162   1
   2  -6  10 2.41822 9.65585   3
   3  -6  10  9.7054 11.1410   3
   4  -6  10 52.7171 15.0068   3
   5  -6  10 33.8388  7.2962   2
   5  -6  10  2.9700 12.7317   3
   6  -6  10 84.2128  9.8149   2
   6  -6  10 20.1158 15.8515   3
   7  -6  10 -5.6673 13.0098   3
   7  -6  10 -3.4660  7.3233   2
  -6  -5  10 25.2573 11.7682   1
  -5  -5  10 275.636  22.128   1
  -4  -5  10 5.91085 8.06801   1
  -3  -5  10 611.858  34.293   2
  -3  -5  10 589.015  32.908   1
  -2  -5  10 189.445  14.348   1
  -1  -5  10 12.6332  9.4552   3
  -1  -5  10 19.8299  5.7868   1
   0  -5  10 472.473  37.291   3
   0  -5  10 506.230  25.723   1
   1  -5  10 43.6566 10.9899   3
   1  -5  10 46.4385  5.8163   1
   2  -5  10 411.124  20.377   1
   2  -5  10 335.760  30.878   3
   3  -5  10 428.056  22.662   1
   4  -5  10  0.9151 10.6453   3
   4  -5  10 0.65858 6.00742   1
   4  -5  10 -3.2978  5.1546   2
   5  -5  10 242.012  16.432   1
   5  -5  10 200.180  25.914   3
   5  -5  10 213.271  15.409   2
   6  -5  10 95.5057 20.4606   3
   6  -5  10 134.622  12.991   1
   6  -5  10 81.0907 10.2969   2
   7  -5  10 28.1267  8.5610   2
   7  -5  10 25.5211 16.0235   3
  -7  -4  10 -6.8474 10.8150   1
  -6  -4  10 69.9162 13.5066   1
  -5  -4  10 42.2393 10.8463   1
  -4  -4  10 -0.5289  6.8766   1
  -3  -4  10 509.441  28.658   1
  -3  -4  10 515.304  29.390   2
  -2  -4  10 237.474  16.546   1
  -2  -4  10 270.965  22.829   3
  -1  -4  10 254.264  16.731   1
  -1  -4  10 300.561  24.149   3
   0  -4  10 288.006  24.356   3
   0  -4  10 293.278  17.072   1
   1  -4  10 81.2481  7.4377   1
   1  -4  10 56.4088 11.1120   3
   2  -4  10 7.90077 7.88846   3
   2  -4  10 11.9221  5.2843   1
   3  -4  10 9.62803 9.00935   3
   3  -4  10 14.6208  5.5961   1
   3  -4  10 7.46034 4.60797   2
   4  -4  10 510.231  27.347   2
   4  -4  10 504.184  41.179   3
   5  -4  10 -2.2736  5.7887   2
   5  -4  10  3.2569 12.4231   3
   6  -4  10 630.445  34.679   2
   6  -4  10 645.814  52.278   3
   7  -4  10 -4.0831 13.3691   3
   7  -4  10 -3.2780  7.5665   2
  -7  -3  10 222.994  21.368   1
   6   3 -10 9.10039 7.80247   1
  -6  -3  10 -9.4680  8.6990   1
   5   3 -10 688.107  38.846   1
  -5  -3  10 775.571  40.410   1
   4   3 -10 6.67501 5.62681   1
  -4  -3  10 3.77272 6.83020   1
   3   3 -10 1044.59   51.50   1
  -3  -3  10 1066.44   52.29   1
   2   3 -10 288.844  17.710   1
  -2  -3  10 346.219  25.229   3
  -2  -3  10 307.192  18.799   1
   1   3 -10 104.671   8.649   1
  -1  -3  10 100.081  13.052   3
  -1  -3  10 102.420   9.845   1
   0  -3  10 155.704  17.053   3
   0  -3  10 175.082  11.973   1
   1  -3  10 715.000  34.294   1
   1  -3  10 636.492  46.131   3
   2  -3  10 20.0196  5.3313   1
   2  -3  10 14.2486  7.8787   3
   3  -3  10 748.433  36.806   2
   3  -3  10 696.299  51.134   3
   4  -3  10 13.0472 10.8340   3
   4  -3  10 6.83935 5.14870   2
   5  -3  10 79.3053  9.0717   2
   5  -3  10 79.7586 17.5883   3
   6  -3  10 10.3672  7.3835   2
   6  -3  10 19.8205 14.9416   3
   7  -3  10 39.6703 16.7456   3
   7  -3  10 23.3031  9.0490   2
   7   2 -10 105.821  14.198   1
   6   2 -10 46.4499  9.9349   1
  -6  -2  10 51.6731 11.3358   1
   5   2 -10 5.04897 6.39424   1
  -5  -2  10 14.6642  7.9683   1
   4   2 -10 268.627  17.671   1
  -4  -2  10 283.090  18.588   1
   3   2 -10 37.2066  6.2220   1
  -3  -2  10 33.4566  6.9477   1
   2   2 -10 1061.76   51.08   1
  -2  -2  10 1099.47   68.16   3
  -2  -2  10 1016.84   51.30   1
   1   2 -10 99.3164  8.5054   1
  -1  -2  10 100.561  12.065   3
  -1  -2  10 108.028   9.660   1
   0   2 -10 1048.39   43.78   1
   0  -2  10 774.239  43.750   1
   0  -2  10 876.854  58.636   3
  -1   2 -10 301.229  16.711   1
   1  -2  10 258.339  17.276   1
   1  -2  10 334.496  24.087   3
   2  -2  10 529.926  37.796   3
   3  -2  10 537.248  39.122   3
   3  -2  10 513.434  27.532   2
   4  -2  10 684.668  36.308   2
   4  -2  10 726.353  52.141   3
   5  -2  10 28.2680  7.0041   2
   5  -2  10 20.0501 13.8407   3
   6  -2  10 761.600  59.358   3
   6  -2  10 770.826  41.149   2
   7  -2  10 22.9158 15.8722   3
   8   1 -10 7.31344 9.51930   1
   7   1 -10 216.083  18.385   1
   6   1 -10 -1.9599  6.6670   1
   5   1 -10 1433.02   68.73   1
  -5  -1  10 1380.84   68.86   1
   4   1 -10 2.48430 4.81289   1
  -4  -1  10 4.20710 5.72540   1
   3   1 -10 780.382  39.004   1
  -3  -1  10 772.999  39.386   1
   2   1 -10 3.97176 3.82200   1
  -2  -1  10 4.90494 5.02522   3
  -2  -1  10 1.36645 4.51311   1
   1   1 -10 104.451   8.993   1
  -1  -1  10 94.1629 11.3340   3
  -1  -1  10 102.360   9.677   1
   0   1 -10 -0.8773  3.4088   1
   0  -1  10 13.6263  5.3573   3
   0  -1  10 8.83787 5.12119   1
  -1   1 -10 1417.65   66.26   1
   1  -1  10 1459.76   89.01   3
   1  -1  10 1353.44   66.63   1
  -2   1 -10 436.228  24.967   1
   2  -1  10 481.971  34.103   3
  -3   1 -10 270.018  17.016   1
   3  -1  10 277.867  16.810   2
   3  -1  10 281.304  25.827   3
   4  -1  10 267.426  28.446   3
   4  -1  10 298.569  18.078   2
   5  -1  10  5.9557 13.2094   3
   6  -1  10 134.191  23.332   3
   7  -1  10 78.2208 21.3112   3
   8   0 -10 30.0340 10.5530   1
   7   0 -10 151.281  15.136   1
   6   0 -10 70.8321 10.3366   1
   5   0 -10 96.9375 10.3297   1
   4   0 -10 608.130  31.458   1
  -4   0  10 575.205  31.485   1
   3   0 -10 12.9931  4.8008   2
   3   0 -10 14.6819  4.9919   1
  -3   0  10 10.0329  5.1894   1
   2   0 -10 2208.07  114.26   2
   2   0 -10 2432.71  111.35   1
  -2   0  10 2526.99  146.57   3
  -2   0  10 2453.34  111.53   1
   1   0 -10 523.595  26.468   1
  -1   0  10 487.667  32.960   3
  -1   0  10 503.134  26.898   1
   0   0 -10 70.8365  6.9023   1
   0   0  10 74.7754  9.4944   3
   0   0  10 69.6829  7.8061   1
  -1   0 -10 976.646  50.817   1
   1   0  10 1108.60   67.51   3
  -2   0 -10 261.546  15.377   1
   2   0  10 206.446  21.754   3
  -3   0 -10 451.226  23.992   1
   3   0  10 395.146  34.208   3
  -4   0 -10 1462.30   69.76   1
   4   0  10 1422.22   96.59   3
   5   0  10 11.2098 13.1754   3
   6   0  10 119.807  22.944   3
   7   0  10 -2.4288 15.0508   3
   8  -1 -10 28.8953 10.6190   1
   7  -1 -10 349.648  23.732   1
   6  -1 -10 44.6336  8.9633   1
   5  -1 -10 356.453  22.285   2
   5  -1 -10 331.770  21.271   1
   4  -1 -10 132.103  12.387   2
   4  -1 -10 129.651  11.364   1
   3  -1 -10 105.287   9.733   1
   3  -1 -10 114.167  10.790   2
  -3   1  10 118.419  10.757   1
   2  -1 -10 51.9266  6.5651   2
   2  -1 -10 47.8608  6.5504   1
  -2   1  10 66.6805  7.2931   1
   1  -1 -10 90.2881  9.0638   2
   1  -1 -10 105.286   9.654   1
  -1   1  10 109.324   9.765   1
   0  -1 -10 381.547  21.215   1
   0  -1 -10 386.285  21.738   2
   0   1  10 392.916  27.005   3
   0   1  10 385.907  21.661   1
  -1  -1 -10 203.361  14.844   1
   1   1  10 226.735  19.367   3
  -2  -1 -10 1247.88   60.22   1
  -3  -1 -10 1.67538 4.92275   1
  -4  -1 -10 1260.45   61.95   1
  -5  -1 -10 100.885  11.477   1
   7   1  10 122.692  25.997   3
   8  -2 -10 -4.3722  8.5844   1
   7  -2 -10 415.669  26.331   1
   6  -2 -10 100.758  11.695   1
   6  -2 -10 122.886  12.774   2
   5  -2 -10 264.815  18.753   2
   5  -2 -10 232.156  17.239   1
   4  -2 -10 267.872  18.058   2
   4  -2 -10 264.220  17.182   1
   3  -2 -10 142.579  12.906   2
   3  -2 -10 198.617  12.993   1
   2  -2 -10 194.646  13.623   1
   1  -2 -10 548.875  29.150   1
   1  -2 -10 538.586  29.358   2
  -1   2  10 588.051  29.963   1
   0  -2 -10 6.30287 4.65526   1
   0  -2 -10 1.02358 4.84227   2
   0   2  10 7.74420 5.36938   1
  -1  -2 -10 1032.72   51.42   2
  -1  -2 -10 1017.26   50.73   1
  -2  -2 -10 321.586  19.852   1
  -3  -2 -10 2.25382 5.42578   1
  -4  -2 -10 120.343  11.842   1
  -5  -2 -10 67.5370 10.3787   1
   8  -3 -10 -10.878   7.908   1
   7  -3 -10 43.7362 10.6944   2
   7  -3 -10 42.5229  9.9822   1
   6  -3 -10 218.350  17.243   1
   6  -3 -10 244.790  19.160   2
   5  -3 -10 77.8227  9.8301   1
   5  -3 -10 110.556  11.494   2
   4  -3 -10 516.224  26.355   1
   4  -3 -10 418.032  26.842   2
   3  -3 -10 127.835  11.917   2
   3  -3 -10 114.764  10.903   1
   2  -3 -10 16.9510  5.7754   1
   2  -3 -10 27.3600  5.6846   2
   1  -3 -10 41.0274  6.6141   1
   1  -3 -10 34.6548  6.8546   2
   0  -3 -10 454.554  25.286   2
   0  -3 -10 431.046  25.208   1
  -1  -3 -10 8.66778 5.65279   1
  -1  -3 -10 6.81876 5.42226   2
  -2  -3 -10 1450.49   70.40   1
  -3  -3 -10 51.9861  8.6603   1
  -4  -3 -10 500.084  29.298   1
  -5  -3 -10 35.6884  9.0817   1
  -6  -3 -10 28.1302  9.9824   1
   7  -4 -10 197.952  16.348   1
   7  -4 -10 199.781  15.895   4
   7  -4 -10 231.806  19.188   2
   6  -4 -10 9.14083 9.05918   2
   6  -4 -10 3.11703 6.73134   1
   5  -4 -10 46.7055  9.2867   2
   5  -4 -10 41.4678  8.1138   1
   4  -4 -10 152.835  12.283   1
   4  -4 -10 101.338  11.561   2
   3  -4 -10 376.433  20.909   2
   3  -4 -10 285.351  19.129   1
   2  -4 -10 72.4669  8.4590   2
   2  -4 -10 52.0884  7.9420   1
   1  -4 -10 487.966  29.252   2
   1  -4 -10 531.149  27.715   1
   0  -4 -10 348.980  21.415   2
   0  -4 -10 332.980  21.305   1
  -1  -4 -10 154.506  13.648   2
  -1  -4 -10 146.602  10.423   4
  -1  -4 -10 135.513  12.912   1
  -2  -4 -10 23.1448  7.4006   1
  -3  -4 -10 47.7364  9.2912   1
  -4  -4 -10 7.94716 7.42589   1
  -5  -4 -10 98.0126 12.9120   1
   7  -5 -10 5.96458 8.08156   4
   7  -5 -10 5.14258 9.07320   2
   7  -5 -10 2.04981 6.35801   1
   6  -5 -10 212.687  16.547   4
   6  -5 -10 228.342  18.537   2
   6  -5 -10 197.140  15.077   1
   5  -5 -10 33.6365  8.7223   4
   5  -5 -10 25.9296  7.0464   1
   5  -5 -10 28.5006  8.6546   2
   4  -5 -10 255.072  19.370   2
   4  -5 -10 257.647  18.183   4
   4  -5 -10 253.247  16.868   1
   3  -5 -10 133.271  12.953   4
   3  -5 -10 151.888  13.806   2
   3  -5 -10 127.158  11.463   1
   2  -5 -10 43.9142  7.6930   1
   2  -5 -10 69.2349  9.3352   2
   2  -5 -10 56.6292  9.3924   4
   1  -5 -10 75.0635 10.3230   2
   1  -5 -10 76.3289  9.2787   4
   1  -5 -10 76.2192  9.1086   1
   0  -5 -10 508.326  30.396   1
   0  -5 -10 561.754  31.652   2
   0  -5 -10 586.271  26.727   4
  -1  -5 -10 -0.8535  5.0778   4
  -1  -5 -10 -9.4959  6.5810   1
  -1  -5 -10 -0.1166  6.9519   2
  -2  -5 -10 510.139  30.171   1
  -3  -5 -10 11.1729  8.1236   1
  -4  -5 -10 255.551  20.396   1
  -5  -5 -10 1.90948 8.42286   1
   6  -6 -10 5.61528 8.79155   2
   6  -6 -10 -0.2004  7.9634   4
   5  -6 -10 10.8190  8.5993   4
   5  -6 -10 -2.1495  7.8706   2
   4  -6 -10 5.24972 8.87316   4
   4  -6 -10 12.0477  8.6501   2
   4  -6 -10 5.93045 5.21575   1
   3  -6 -10 26.6529  9.9583   4
   3  -6 -10 36.7377  9.0314   2
   3  -6 -10 44.7815  6.8229   1
   2  -6 -10 229.325  16.809   4
   2  -6 -10 142.734  13.495   1
   2  -6 -10 235.444  17.650   2
   1  -6 -10 80.0432 11.8355   2
   1  -6 -10 81.7661 10.3164   4
   1  -6 -10 110.689  10.627   1
   0  -6 -10 273.855  17.439   4
   0  -6 -10 296.184  20.882   2
   0  -6 -10 272.736  18.842   1
  -1  -6 -10 36.9777 10.1433   1
  -1  -6 -10 45.9006  9.9180   2
  -2  -6 -10 49.2884 10.8794   1
  -3  -6 -10 51.7635 11.2047   1
   5  -7 -10 35.8011 10.8741   4
   5  -7 -10 3.64556 8.41751   2
   4  -7 -10  7.3249 10.0160   4
   4  -7 -10 17.9572  9.5485   2
   3  -7 -10 91.2872 13.1149   4
   3  -7 -10 83.0803 11.6348   2
   2  -7 -10 10.7743  8.8564   2
   2  -7 -10 1.98287 8.91439   4
   1  -7 -10 33.9621  9.2003   4
   1  -7 -10 30.7983 10.4590   2
   1  -7 -10 34.6409  7.8258   1
   0  -7 -10 93.9690 10.4988   1
   0  -7 -10 100.038  13.210   2
   0  -7 -10 105.986  10.821   4
  -1  -7 -10 13.7987  9.4666   2
  -1  -7 -10 6.63293 7.78131   1
  -2  -7 -10 115.007  14.887   1
   3  -8 -10  0.9384 10.5888   4
   3  -8 -10 12.8163  8.9318   2
   2  -8 -10 171.607  16.839   2
   2  -8 -10 180.164  16.131   4
   1  -8 -10 -0.9565  8.6254   4
   1  -8 -10 4.51993 9.66877   2
   0  -8 -10 130.359  15.960   2
  -1  -9  11 9.10276 8.76403   2
   0  -9  11 58.0023  9.8355   2
   1  -9  11 45.1945  8.7239   2
   1  -9  11 79.6843 18.5533   3
   2  -9  11 26.3086 15.6798   3
   3  -9  11 48.4628 17.0879   3
  -3  -8  11 125.029  15.797   2
  -3  -8  11 134.853  13.977   1
  -2  -8  11 15.6149  9.6683   2
  -2  -8  11 16.0767  8.0041   1
  -1  -8  11 154.829  13.211   1
  -1  -8  11 152.000  14.546   2
   0  -8  11 38.5308 15.3298   3
   1  -8  11 16.0441 14.1417   3
   2  -8  11 65.9544 17.1735   3
   3  -8  11 16.5990 14.4332   3
   4  -8  11 202.560  26.163   3
   5  -8  11 -5.3521 13.6053   3
  -4  -7  11 52.8443 11.7935   1
  -3  -7  11 30.5044  9.4712   1
  -3  -7  11 28.8219 10.6691   2
  -2  -7  11 80.6860 11.5741   2
  -2  -7  11 63.9335  9.7640   1
  -1  -7  11 31.2029  7.2806   1
   0  -7  11 239.649  26.827   3
   0  -7  11 234.949  15.119   1
   1  -7  11 128.619  19.691   3
   2  -7  11  8.0002 11.8399   3
   3  -7  11 66.6069 16.2108   3
   4  -7  11 -3.0391 12.5990   3
   5  -7  11  9.2816 14.4328   3
   6  -7  11 12.1568 15.7674   3
  -5  -6  11 82.9222 14.1934   1
  -4  -6  11 54.6215 11.4620   1
  -3  -6  11 171.244  15.975   2
  -3  -6  11 156.177  14.702   1
  -2  -6  11 141.744  12.747   1
  -1  -6  11 106.884  10.101   1
  -1  -6  11 102.337  17.516   3
   0  -6  11 8.05472 5.28158   1
   0  -6  11  6.8766 10.4865   3
   1  -6  11 28.2633  5.7251   1
   1  -6  11 21.2178 11.4614   3
   2  -6  11 237.537  26.512   3
   2  -6  11 302.772  16.065   1
   3  -6  11 -6.5733  9.9583   3
   4  -6  11 331.345  31.912   3
   5  -6  11 24.0147 14.8586   3
   6  -6  11 257.303  17.941   2
   6  -6  11 232.126  29.931   3
  -6  -5  11  3.0110 10.8889   1
  -5  -5  11 224.959  20.382   1
  -4  -5  11 42.6031 10.5075   1
  -3  -5  11 47.1107  9.4103   1
  -3  -5  11 43.8906  9.4873   2
  -2  -5  11 192.845  15.048   1
  -1  -5  11 238.675  24.114   3
  -1  -5  11 234.631  15.792   1
   0  -5  11 130.693  16.887   3
   0  -5  11 128.875  10.981   1
   1  -5  11 446.604  22.685   1
   1  -5  11 381.119  33.597   3
   2  -5  11 172.157  12.107   1
   3  -5  11 21.6002 11.2962   3
   3  -5  11 8.75605 5.74668   1
   4  -5  11 1.37723 6.57965   1
   4  -5  11 22.4544 12.6666   3
   5  -5  11 62.2621 18.0172   3
   5  -5  11 93.4930 10.8693   1
   5  -5  11 81.3820  9.7224   2
   6  -5  11 2.26644 7.24952   2
   6  -5  11 -9.8061  7.9646   1
   6  -5  11 -1.3901 13.7072   3
   7  -5  11 135.660  24.054   3
   7  -5  11 133.094  13.441   2
  -6  -4  11 29.5479 11.9710   1
  -5  -4  11 1.29385 8.81938   1
  -4  -4  11 381.049  24.683   1
  -3  -4  11 179.709  15.166   1
  -2  -4  11 379.867  30.226   3
  -2  -4  11 369.514  22.189   1
  -1  -4  11 34.8205  6.6330   1
  -1  -4  11 39.6993 10.2211   3
   0  -4  11 68.0787 12.0888   3
   0  -4  11 88.1507  8.2804   1
   1  -4  11 355.615  17.910   1
   1  -4  11 227.712  24.410   3
   2  -4  11 957.648  44.114   1
   2  -4  11 812.288  60.333   3
   3  -4  11 -0.6756  8.5495   3
   3  -4  11 -0.3464  5.4339   1
   4  -4  11 852.147  43.130   2
   4  -4  11 825.819  61.186   3
   4  -4  11 848.174  42.884   1
   5  -4  11  2.7653 13.2957   3
   5  -4  11 9.67990 6.74669   2
   6  -4  11 237.097  17.653   2
   6  -4  11 234.359  29.414   3
   7  -4  11  0.6846 14.9613   3
   7  -4  11 3.33711 8.04159   2
  -7  -3  11 299.756  25.441   1
  -6  -3  11  6.6807 10.0166   1
   5   3 -11 285.490  20.184   1
  -5  -3  11 291.832  21.785   1
   4   3 -11 3.66209 5.46187   1
  -4  -3  11 2.35695 6.84990   1
   3   3 -11 26.7470  6.1605   1
  -3  -3  11 26.8255  7.2670   1
   2   3 -11 64.6389  7.2654   1
  -2  -3  11 54.6058  8.0448   1
  -2  -3  11 63.2582 10.8070   3
  -1  -3  11 444.778  32.617   3
  -1  -3  11 431.615  24.253   1
   0  -3  11 509.222  25.659   1
   0  -3  11 438.170  34.511   3
   1  -3  11 20.1332  6.0559   1
   1  -3  11 22.9393  8.0096   3
   2  -3  11 887.242  43.734   1
   2  -3  11 889.936  60.043   3
   3  -3  11 123.678  10.508   2
   3  -3  11 123.619  16.570   3
   4  -3  11 469.608  26.002   2
   4  -3  11 464.192  38.509   3
   5  -3  11 362.034  22.157   2
   5  -3  11 353.150  34.071   3
   6  -3  11  4.1448 14.0178   3
   6  -3  11 7.23391 7.44633   2
   7  -3  11 223.655  18.298   2
   7  -3  11 203.493  28.232   3
   7   2 -11 71.9183 12.8164   1
   6   2 -11 146.230  14.677   1
  -6  -2  11 122.791  15.173   1
   5   2 -11 24.9093  7.6828   1
  -5  -2  11 25.6918  8.8554   1
   4   2 -11 828.172  42.746   1
  -4  -2  11 844.097  43.459   1
   3   2 -11 150.949  12.260   1
  -3  -2  11 160.938  13.652   1
   2   2 -11 85.5672  8.0321   1
  -2  -2  11 67.1660  8.2653   1
  -2  -2  11 69.3823 10.2980   3
   1   2 -11 1788.02   81.31   1
  -1  -2  11 1734.42   81.84   1
  -1  -2  11 1688.67  108.63   3
   0   2 -11 60.8794  7.0360   1
   0  -2  11 100.113  12.309   3
   0  -2  11 89.7901  8.8797   1
  -1   2 -11 384.552  20.537   1
   1  -2  11 367.046  21.321   1
   1  -2  11 373.068  28.273   3
   2  -2  11 1590.86  101.43   3
   3  -2  11 23.5180  5.5754   2
   3  -2  11 17.5555  9.6229   3
   4  -2  11 273.321  27.126   3
   4  -2  11 271.642  17.622   2
   5  -2  11 171.462  14.439   2
   5  -2  11 183.674  23.995   3
   6  -2  11 52.7297 17.8274   3
   7  -2  11  8.6180 15.0866   3
   8   1 -11 6.40104 9.47572   1
   7   1 -11 138.517  15.061   1
   6   1 -11 143.523  14.267   1
   5   1 -11 143.646  13.735   1
  -5  -1  11 158.478  14.272   1
   4   1 -11 59.5907  8.2506   1
  -4  -1  11 58.2368  8.9235   1
   3   1 -11 53.2989  7.3386   1
  -3  -1  11 64.6625  8.2606   1
   2   1 -11 316.106  18.096   1
  -2  -1  11 295.022  22.437   3
  -2  -1  11 295.207  18.686   1
   1   1 -11 15.4171  4.7158   1
  -1  -1  11 6.49755 5.13146   1
  -1  -1  11 12.9224  5.6275   3
   0   1 -11 1805.35   85.87   1
   0  -1  11 1888.27  114.53   3
   0  -1  11 1821.29   86.56   1
  -1   1 -11 2.46083 3.63134   1
   1  -1  11 3.40287 4.74291   1
   1  -1  11 -3.5581  5.3210   3
  -2   1 -11 2979.26  151.98   1
   2  -1  11 3624.53  204.23   3
  -3   1 -11 409.468  23.839   1
   3  -1  11 417.290  33.962   3
   3  -1  11 418.422  23.444   2
   4  -1  11 606.867  47.759   3
   4  -1  11 619.466  33.093   2
   5  -1  11 224.624  27.605   3
   6  -1  11 -9.4870 13.5432   3
   7  -1  11 81.5224 21.0479   3
   8   0 -11 11.6828  9.6909   1
   7   0 -11 97.0752 13.0617   1
   6   0 -11 190.478  16.506   1
   5   0 -11 103.179  11.104   1
   4   0 -11 227.804  15.547   1
  -4   0  11 204.449  15.981   1
   3   0 -11 737.756  37.717   1
  -3   0  11 742.785  37.908   1
   2   0 -11 211.305  14.090   1
  -2   0  11 211.365  14.553   1
   1   0 -11 718.506  35.822   1
  -1   0  11 709.760  45.463   3
  -1   0  11 688.125  36.216   1
   0   0 -11 589.268  30.184   1
   0   0  11 573.092  30.909   1
   0   0  11 610.682  39.423   3
  -1   0 -11 20.7500  5.4503   1
   1   0  11 26.2384  7.5927   3
  -2   0 -11 34.9228  6.5561   1
   2   0  11 20.8115  9.4134   3
  -3   0 -11 640.854  31.016   1
   3   0  11 478.343  42.337   3
  -4   0 -11 111.850  10.966   1
   4   0  11 71.4969 16.9125   3
   5   0  11 366.315  35.726   3
   6   0  11  5.5276 14.9816   3
   7   0  11 -5.6826 15.7074   3
   8  -1 -11 95.7162 14.0777   1
   7  -1 -11 30.7235  9.7592   1
   6  -1 -11 241.605  18.446   1
   5  -1 -11 36.5822  7.9806   1
   4  -1 -11 23.0574  6.6862   2
   4  -1 -11 11.7032  6.0011   1
   3  -1 -11 108.278   9.825   1
   3  -1 -11 85.6390  9.2441   2
  -3   1  11 122.650  11.192   1
   2  -1 -11 404.967  26.059   1
   2  -1 -11 584.696  27.225   2
  -2   1  11 484.628  26.708   1
   1  -1 -11 6.50169 4.24604   2
   1  -1 -11 -0.1346  4.3966   1
  -1   1  11 1.24100 5.16369   1
   0  -1 -11 3157.27  153.81   2
   0  -1 -11 3168.54  149.32   1
   0   1  11 3351.22  149.73   1
   0   1  11 3325.65  198.33   3
  -1  -1 -11 240.243  16.282   1
   1   1  11 215.152  20.278   3
  -2  -1 -11 1776.58   84.49   1
  -3  -1 -11 135.351  12.644   1
  -4  -1 -11 97.6923 11.1827   1
   6   1  11 20.0342 16.6410   3
   7   1  11 48.3970 20.1777   3
   8  -2 -11 -2.3943  8.8149   1
   7  -2 -11 21.4922  9.1515   1
   6  -2 -11 36.5080  9.0315   1
   5  -2 -11 91.7289 11.6759   2
   5  -2 -11 92.9095 10.7729   1
   4  -2 -11 42.3272  7.8451   2
   4  -2 -11 42.3413  7.5551   1
   3  -2 -11 458.458  26.034   2
   3  -2 -11 452.549  25.410   1
   2  -2 -11 410.518  21.491   2
   2  -2 -11 320.905  21.139   1
   1  -2 -11 45.4597  6.5163   2
   1  -2 -11 49.7790  7.1868   1
  -1   2  11 53.8019  8.4600   1
   0  -2 -11 308.756  21.528   2
   0  -2 -11 383.541  21.154   1
   0   2  11 395.282  21.383   1
  -1  -2 -11 245.186  17.492   1
  -2  -2 -11 83.6969  9.5337   1
  -3  -2 -11 914.371  47.034   1
  -4  -2 -11 7.49141 6.91048   1
  -5  -2 -11 172.611  16.069   1
   7  -3 -11 53.0427 10.4686   1
   7  -3 -11 53.6803 11.5871   2
   6  -3 -11 262.617  19.660   1
   6  -3 -11 297.263  22.415   2
   5  -3 -11 194.133  17.266   2
   5  -3 -11 182.632  15.257   1
   4  -3 -11 10.4672  6.1823   1
   4  -3 -11 -5.1465  7.0002   2
   3  -3 -11 232.844  17.170   1
   3  -3 -11 310.065  18.601   2
   2  -3 -11 799.172  42.696   1
   2  -3 -11 889.294  43.575   2
   1  -3 -11 135.962  11.862   1
   1  -3 -11 128.107  12.424   2
   0  -3 -11 1073.35   55.19   2
   0  -3 -11 1089.48   53.54   1
  -1  -3 -11 53.2392  8.1548   2
  -1  -3 -11 43.1716  8.4810   1
  -2  -3 -11 555.350  31.319   1
  -3  -3 -11 2.08296 6.61107   1
  -4  -3 -11 38.0732  9.2040   1
  -5  -3 -11 3.95847 7.99363   1
  -6  -3 -11 3.73200 9.12081   1
   7  -4 -11 -2.0002  7.2113   4
   7  -4 -11 3.53136 7.51419   1
   7  -4 -11 0.46764 9.70885   2
   6  -4 -11 7.01441 9.76371   2
   6  -4 -11 -1.8081  6.7889   1
   5  -4 -11 136.645  12.837   1
   5  -4 -11 100.959  12.346   2
   4  -4 -11 479.567  25.946   1
   4  -4 -11 409.621  26.893   2
   3  -4 -11 115.999  10.843   2
   3  -4 -11 77.9967  9.2802   1
   2  -4 -11 800.856  41.210   2
   2  -4 -11 773.529  40.534   1
   1  -4 -11 72.8524 10.2756   2
   1  -4 -11 99.0770  9.9452   1
   0  -4 -11 664.210  36.044   2
   0  -4 -11 634.310  34.675   1
  -1  -4 -11 177.147  17.320   1
  -1  -4 -11 230.914  13.327   4
  -1  -4 -11 231.650  17.486   2
  -2  -4 -11 19.6414  7.7672   1
  -3  -4 -11 354.632  23.715   1
  -4  -4 -11 11.3708  8.3765   1
  -5  -4 -11 95.3347 13.3771   1
   7  -5 -11 17.2563 10.3705   2
   7  -5 -11 11.1674  8.3250   4
   7  -5 -11 6.18261 6.87756   1
   6  -5 -11 41.0900 10.8357   2
   6  -5 -11 38.4417  9.0383   4
   6  -5 -11 21.6448  7.4706   1
   5  -5 -11 123.350  12.828   4
   5  -5 -11 144.072  13.190   1
   4  -5 -11 13.6217  6.8067   1
   4  -5 -11 26.6929  9.4481   2
   3  -5 -11 83.1401 10.2119   2
   3  -5 -11 48.0435  8.0358   1
   2  -5 -11 205.452  16.066   2
   2  -5 -11 195.191  16.330   4
   2  -5 -11 179.643  14.947   1
   1  -5 -11 106.795  10.963   1
   1  -5 -11 108.967  10.734   4
   1  -5 -11 75.0872 11.3917   2
   0  -5 -11 234.814  17.491   1
   0  -5 -11 254.597  19.353   2
   0  -5 -11 250.302  15.982   4
  -1  -5 -11 134.651  13.682   2
  -1  -5 -11 127.297  14.388   1
  -2  -5 -11 75.8791 11.8238   1
  -3  -5 -11 49.5819 10.6362   1
  -4  -5 -11 9.06861 8.82999   1
   6  -6 -11 25.1165 10.2390   2
   6  -6 -11 17.1623  9.0434   4
   5  -6 -11 -29.542   7.469   2
   5  -6 -11 2.26023 8.64062   4
   4  -6 -11 225.494  18.161   4
   4  -6 -11 216.806  15.658   1
   4  -6 -11 260.319  19.804   2
   3  -6 -11 34.1734 10.7700   4
   3  -6 -11 35.1015  9.1458   2
   3  -6 -11 25.4849  6.6594   1
   2  -6 -11 539.903  27.683   4
   2  -6 -11 513.915  29.712   2
   2  -6 -11 431.867  26.869   1
   1  -6 -11 14.9721  8.1510   4
   1  -6 -11 19.5943  9.5332   2
   1  -6 -11 16.5919  7.3771   1
   0  -6 -11 175.000  14.163   4
   0  -6 -11 174.472  14.940   1
   0  -6 -11 173.599  17.422   2
  -1  -6 -11 157.768  15.865   2
  -1  -6 -11 158.759  15.769   1
  -2  -6 -11 -0.4879  9.1473   1
  -3  -6 -11 68.5407 12.8104   1
   5  -7 -11 -13.233   8.406   2
   5  -7 -11 18.6882 10.6870   4
   4  -7 -11 9.64309 9.53395   2
   4  -7 -11  3.3277 10.4675   4
   3  -7 -11 1.03197 9.91738   4
   3  -7 -11 2.99463 8.55808   2
   2  -7 -11 -8.3260  5.0210   1
   2  -7 -11 -3.8525  8.1810   2
   2  -7 -11 3.33637 9.14528   4
   1  -7 -11 74.2547 13.3215   2
   1  -7 -11 96.3805 10.6887   1
   1  -7 -11 109.995  12.005   4
   0  -7 -11  1.2272 10.0339   2
   0  -7 -11 19.8270  7.6115   1
  -1  -7 -11 87.2339 11.8299   1
  -1  -7 -11 102.339  14.334   2
  -2  -7 -11 28.7929 10.8522   1
   2  -8 -11 268.571  20.214   4
   2  -8 -11 244.889  19.788   2
   1  -8 -11 15.5541 10.7754   2
   1  -8 -11 19.3527  9.3744   4
   0  -9  12 44.2501  9.7836   2
   1  -9  12 24.9044 15.4563   3
   2  -9  12 16.3830 15.3282   3
  -3  -8  12 35.1115 10.1830   1
  -3  -8  12 28.9475 12.0387   2
  -2  -8  12 8.52176 9.59835   2
  -2  -8  12 -1.3572  7.4884   1
  -1  -8  12 34.7741 10.0143   2
  -1  -8  12 47.0816  8.4301   1
   0  -8  12 121.124  21.546   3
   1  -8  12 -6.4481 13.3250   3
   2  -8  12 202.841  26.252   3
   3  -8  12 13.6045 14.8433   3
   4  -8  12 216.631  27.883   3
  -4  -7  12 80.4755 13.4926   1
  -3  -7  12 3.63301 8.58213   1
  -3  -7  12 6.24978 9.74868   2
  -2  -7  12 155.252  14.159   1
  -2  -7  12 161.384  15.629   2
  -1  -7  12 77.1198 17.8558   3
  -1  -7  12 55.3284  8.5754   1
   0  -7  12 238.797  28.302   3
   0  -7  12 252.803  16.029   1
   1  -7  12 -3.8321 11.5670   3
   2  -7  12 44.0710 14.8195   3
   3  -7  12 58.6079 16.4061   3
   4  -7  12 -8.0758 12.0864   3
   5  -7  12 57.4107 18.3386   3
  -5  -6  12 60.2103 13.0765   1
  -4  -6  12 66.5468 12.1570   1
  -3  -6  12 62.4699 11.0696   1
  -3  -6  12 70.1988 11.9359   2
  -2  -6  12 2.76191 7.06888   1
  -1  -6  12 74.0938  9.2095   1
  -1  -6  12 84.8583 16.7856   3
   0  -6  12 467.457  39.346   3
   0  -6  12 491.201  26.024   1
   1  -6  12 -6.8553  9.4916   3
   1  -6  12 -0.1185  5.0878   1
   2  -6  12 319.618  34.134   3
   2  -6  12 472.020  22.282   1
   3  -6  12 27.5008  5.6416   1
   3  -6  12 -9.5281  9.9376   3
   4  -6  12 157.491  22.604   3
   5  -6  12  6.7741 13.8331   3
   6  -6  12  8.0131 14.9525   3
  -6  -5  12 -1.9666 10.9607   1
  -5  -5  12 15.7949 10.3025   1
  -4  -5  12 79.5867 12.4860   1
  -3  -5  12 38.7496  9.3157   1
  -2  -5  12 331.331  22.007   1
  -2  -5  12 389.693  32.040   3
  -1  -5  12 12.8785 10.5386   3
  -1  -5  12 28.5495  6.8964   1
   0  -5  12 705.922  52.909   3
   0  -5  12 767.616  37.554   1
   1  -5  12 85.5363  8.2943   1
   1  -5  12 53.0334 13.1606   3
   2  -5  12 433.397  23.696   1
   3  -5  12 332.835  19.999   1
   3  -5  12 326.600  30.274   3
   4  -5  12  6.7859 12.1047   3
   4  -5  12 12.8849  7.7452   1
   5  -5  12 319.705  34.089   3
   5  -5  12 335.743  22.007   1
   6  -5  12 6.18519 8.96462   1
   6  -5  12 7.00249 7.95115   2
   6  -5  12 11.1617 15.6655   3
   7  -5  12 81.1737 21.7106   3
   7  -5  12 77.4843 11.6555   2
  -6  -4  12 105.003  15.782   1
  -5  -4  12 19.6470 10.4598   1
  -4  -4  12 216.121  18.399   1
  -3  -4  12 391.841  24.472   1
  -2  -4  12 42.7950  8.3081   1
  -2  -4  12 41.4789 11.3653   3
  -1  -4  12 23.1472  9.5566   3
  -1  -4  12 25.6782  6.5655   1
   0  -4  12 216.517  22.306   3
   0  -4  12 281.566  16.818   1
   1  -4  12 5.31564 8.02328   3
   1  -4  12 2.95630 5.15202   1
   2  -4  12 246.346  24.531   3
   2  -4  12 292.200  17.789   1
   3  -4  12 424.210  35.409   3
   3  -4  12 442.767  24.861   1
   4  -4  12 21.9873 12.9480   3
   4  -4  12 7.53364 6.99746   1
   5  -4  12 33.5532 15.9777   3
   5  -4  12 35.0746  8.3625   2
   6  -4  12 -2.5239 14.3744   3
   6  -4  12 4.88078 7.88965   2
   7  -4  12  8.4261 15.7073   3
   7  -4  12 -4.1601  8.5555   2
  -6  -3  12 24.9526 11.2338   1
  -5  -3  12 0.71100 8.44923   1
   4   3 -12 51.5302  8.4310   1
  -4  -3  12 33.9377  9.1646   1
   3   3 -12 1.89524 5.26070   1
  -3  -3  12 -5.5926  6.0048   1
  -2  -3  12 1077.54   68.89   3
  -2  -3  12 1000.80   51.50   1
  -1  -3  12 -5.5252  6.1458   3
  -1  -3  12 -1.5340  4.7702   1
   0  -3  12 1483.71   97.19   3
   0  -3  12 1555.66   72.46   1
   1  -3  12 335.926  20.655   1
   1  -3  12 354.424  27.882   3
   2  -3  12 877.825  43.001   1
   2  -3  12 836.898  58.369   3
   3  -3  12 231.645  16.657   1
   3  -3  12 240.798  23.838   3
   4  -3  12 1.34609 6.08957   2
   4  -3  12 -5.9689  9.9412   3
   5  -3  12 117.167  20.545   3
   5  -3  12 114.401  11.633   2
   6  -3  12 149.136  13.994   2
   6  -3  12 140.276  23.581   3
   7  -3  12  3.3098 15.1799   3
   7   2 -12 -6.5141  8.5883   1
   6   2 -12 146.493  15.197   1
  -6  -2  12 151.711  16.728   1
   5   2 -12 314.355  21.759   1
  -5  -2  12 336.222  23.045   1
   4   2 -12 333.256  21.543   1
  -4  -2  12 362.308  22.718   1
   3   2 -12 127.211  11.890   1
  -3  -2  12 144.018  13.230   1
   2   2 -12 24.1368  5.9528   1
  -2  -2  12 24.4568  6.7099   1
  -2  -2  12 27.8880  8.1160   3
   1   2 -12 23.8121  5.1614   1
  -1  -2  12 23.2508  6.2809   1
  -1  -2  12 17.2131  7.0967   3
   0   2 -12 10.1146  4.4406   1
   0  -2  12 11.0854  6.6874   3
   0  -2  12 8.25942 5.72135   1
  -1   2 -12 1589.35   74.15   1
   1  -2  12 1550.80   74.72   1
   1  -2  12 1579.87   99.94   3
   2  -2  12 8.42495 7.70989   3
   2  -2  12 11.3162  5.9102   1
   3  -2  12 1098.09   73.74   3
   4  -2  12 2.17878 6.15956   2
   4  -2  12  2.3996 10.7070   3
   5  -2  12 156.854  22.584   3
   5  -2  12 165.760  14.773   2
   6  -2  12 48.5880 17.5744   3
   7  -2  12 72.6303 19.8757   3
   7   1 -12 26.4992 10.1807   1
   6   1 -12 8.26407 7.95172   1
   5   1 -12 72.2665 10.3303   1
  -5  -1  12 92.2770 11.8912   1
   4   1 -12 457.864  26.155   1
  -4  -1  12 445.480  26.880   1
   3   1 -12 8.61095 5.27307   1
  -3  -1  12 -0.7045  5.5103   1
   2   1 -12 2194.17   99.55   1
  -2  -1  12 2214.47   99.97   1
  -2  -1  12 1971.92  130.86   3
   1   1 -12 52.4047  7.2208   1
  -1  -1  12 76.1953  9.2716   3
  -1  -1  12 47.5652  7.9193   1
   0   1 -12 3598.72  164.59   1
   0  -1  12 3649.32  219.75   3
   0  -1  12 3514.61  165.11   1
  -1   1 -12 82.3523  7.8270   1
   1  -1  12 80.6726  8.7374   1
   1  -1  12 89.8078 11.2723   3
  -2   1 -12 216.375  15.849   1
   2  -1  12 256.627  21.654   3
   3  -1  12 20.2144 10.5653   3
   4  -1  12 134.514  20.336   3
   5  -1  12 35.6539 15.7530   3
   6  -1  12 78.4550 19.7155   3
   7  -1  12 60.5248 19.3811   3
   7   0 -12 16.8192  9.1446   1
   6   0 -12 145.447  14.582   1
   5   0 -12 191.747  16.172   1
   4   0 -12 307.804  20.180   1
  -4   0  12 322.770  21.119   1
   3   0 -12 3.14448 5.00151   1
  -3   0  12 8.03726 5.78057   1
   2   0 -12 539.049  29.274   1
  -2   0  12 565.471  29.909   1
   1   0 -12 712.037  34.952   1
  -1   0  12 652.488  43.768   3
  -1   0  12 660.707  35.321   1
   0   0 -12 268.170  16.942   1
   0   0  12 291.525  21.849   3
   0   0  12 299.111  18.397   1
  -1   0 -12 2273.24  106.09   1
   1   0  12 2317.86  141.28   3
   1   0  12 2235.29  106.37   1
  -2   0 -12 6.22795 5.73100   1
   2   0  12 3.41259 8.25698   3
  -3   0 -12 862.737  42.087   1
   3   0  12 732.975  57.034   3
   4   0  12 95.2575 18.5372   3
   5   0  12  7.1127 13.9485   3
   6   0  12 24.8163 17.0475   3
   7   0  12 39.6746 19.4706   3
   7  -1 -12 74.9301 12.1578   1
   6  -1 -12 -6.0517  6.8629   1
   5  -1 -12 151.563  14.357   1
   4  -1 -12 368.782  22.796   1
   3  -1 -12 72.4271  8.6423   1
   3  -1 -12 52.5682  8.2167   2
  -3   1  12 93.8400  9.7841   1
   2  -1 -12 756.135  37.398   1
  -2   1  12 679.309  37.054   1
   1  -1 -12 78.7933  8.7587   1
   1  -1 -12 83.0682  7.9398   2
  -1   1  12 83.6529  9.7364   1
   0  -1 -12 211.335  14.295   1
   0   1  12 221.228  15.674   1
   0   1  12 212.839  17.436   3
  -1  -1 -12 130.049  12.166   1
   1   1  12 126.037  15.413   3
  -2  -1 -12 23.9949  6.9465   1
   2   1  12 10.5234 10.0050   3
  -3  -1 -12 14.1604  6.7220   1
   3   1  12 10.8483 11.3516   3
  -4  -1 -12 164.935  15.307   1
   4   1  12 148.820  22.259   3
   5   1  12 110.687  21.625   3
   6   1  12  3.3281 15.1566   3
   7   1  12 96.1449 24.5306   3
   7  -2 -12 48.3621 11.0982   1
   6  -2 -12 213.181  17.642   1
   5  -2 -12 25.8473  7.9870   1
   5  -2 -12 10.5602  8.3400   2
   4  -2 -12 643.262  35.725   2
   3  -2 -12 42.7891  7.6299   1
   3  -2 -12 55.8883  8.3700   2
   2  -2 -12 1678.94   81.77   1
   2  -2 -12 1746.33   83.30   2
   1  -2 -12 737.208  36.882   1
   1  -2 -12 647.493  36.312   2
  -1   2  12 745.115  37.489   1
   0  -2 -12 78.8560  8.6049   1
   0  -2 -12 65.8029  8.8533   2
   0   2  12 83.1472  9.7076   1
  -1  -2 -12 380.054  26.335   1
   1   2  12 517.339  34.799   3
  -2  -2 -12 0.66245 6.13430   1
  -3  -2 -12 275.902  19.725   1
  -4  -2 -12 176.988  16.350   1
  -5  -2 -12 0.81543 7.87613   1
   6   2  12 20.6787 17.7683   3
   7  -3 -12 96.8589 12.8371   1
   6  -3 -12 0.87708 9.20512   2
   6  -3 -12 1.40473 7.46604   1
   5  -3 -12 68.1677 10.1305   1
   5  -3 -12 69.9871 11.2738   2
   4  -3 -12 110.609  11.220   1
   4  -3 -12 81.8022 11.3738   2
   3  -3 -12 150.429  13.178   1
   2  -3 -12 52.2223  7.9239   2
   2  -3 -12 49.7436  8.2433   1
   1  -3 -12 833.934  43.885   2
   1  -3 -12 850.179  43.023   1
   0  -3 -12 154.675  12.584   1
   0  -3 -12 117.151  12.487   2
  -1  -3 -12 355.702  23.651   1
  -2  -3 -12 -3.4016  6.3907   1
  -3  -3 -12 -5.8370  6.3847   1
  -4  -3 -12 -6.4913  6.9508   1
  -5  -3 -12 81.7149 12.6177   1
  -6  -3 -12 -0.2663  8.7276   1
   7  -4 -12 -0.9463  7.3407   4
   7  -4 -12 -6.2602 10.0652   2
   7  -4 -12 7.00107 8.14842   1
   6  -4 -12 221.299  20.302   2
   6  -4 -12 222.762  17.798   1
   5  -4 -12 4.93384 7.31719   1
   5  -4 -12 -12.536   7.786   2
   4  -4 -12 1170.37   57.36   2
   4  -4 -12 1026.02   54.59   1
   3  -4 -12 72.7508  9.5826   2
   3  -4 -12 18.2329  7.2459   1
   2  -4 -12 306.608  19.932   1
   2  -4 -12 289.950  19.542   2
   1  -4 -12 165.447  15.531   2
   1  -4 -12 166.835  14.193   1
   0  -4 -12 24.7886  7.2886   1
   0  -4 -12 26.8933  8.9226   2
  -1  -4 -12 149.578  15.679   1
  -1  -4 -12 201.641  16.965   2
  -2  -4 -12 252.784  20.322   1
  -3  -4 -12 210.486  18.401   1
  -4  -4 -12 36.6899 10.3043   1
  -5  -4 -12 38.8226 10.8858   1
   6  -5 -12 30.1422  8.3560   1
   6  -5 -12 26.8968 10.6792   2
   6  -5 -12 21.2153  8.8375   4
   5  -5 -12 1.72751 6.72413   1
   5  -5 -12 -18.952   7.960   2
   5  -5 -12 0.06529 7.84813   4
   4  -5 -12 8.56110 8.89700   2
   4  -5 -12 -4.0522  6.1193   1
   3  -5 -12 157.769  13.773   1
   2  -5 -12 -2.0600  6.3602   2
   2  -5 -12 -2.3027  6.3928   1
   1  -5 -12 519.003  30.048   1
   1  -5 -12 555.779  27.770   4
   1  -5 -12 531.596  32.651   2
   0  -5 -12 8.11347 6.86537   4
   0  -5 -12 14.1548  8.8577   2
   0  -5 -12 13.9171  6.9263   1
  -1  -5 -12 62.1091 11.2918   2
  -1  -5 -12 55.8272 11.1252   1
  -2  -5 -12 10.6102  9.1632   1
  -3  -5 -12 -2.7206  8.6643   1
  -4  -5 -12 11.3863  9.6086   1
   6  -6 -12 117.492  13.268   4
   6  -6 -12 101.702  14.159   2
   5  -6 -12 -12.534   8.631   2
   5  -6 -12 -5.0026  8.7250   4
   4  -6 -12 278.959  20.753   4
   4  -6 -12 305.534  22.003   2
   4  -6 -12 245.790  17.754   1
   3  -6 -12 -11.483   9.035   4
   3  -6 -12 4.58881 8.18291   2
   3  -6 -12 -4.2074  5.2500   1
   2  -6 -12 97.9977 12.7674   4
   2  -6 -12 118.955  12.718   2
   2  -6 -12 105.463  11.353   1
   1  -6 -12 -4.2540  9.0544   2
   1  -6 -12 1.30760 7.73338   4
   1  -6 -12 -0.8972  7.0265   1
   0  -6 -12 26.3244 10.6049   2
   0  -6 -12 18.8673  7.7729   1
   0  -6 -12 5.86540 7.14821   4
  -1  -6 -12 90.1341 13.5262   2
  -1  -6 -12 73.0164 11.6916   1
  -2  -6 -12 13.2809 10.0327   1
  -3  -6 -12 78.2869 14.4372   1
   4  -7 -12 38.1117 11.3055   2
   4  -7 -12 38.7082 12.1119   4
   3  -7 -12 130.027  15.343   4
   3  -7 -12 132.107  14.363   2
   2  -7 -12 -5.7556  8.0262   2
   2  -7 -12 0.69645 5.88536   1
   2  -7 -12 -10.821   8.840   4
   1  -7 -12 205.994  20.292   2
   1  -7 -12 192.198  15.792   1
   1  -7 -12 206.231  17.048   4
   0  -7 -12 16.9700  7.8224   1
   0  -7 -12 28.2950 12.0204   2
  -1  -7 -12 28.3309 12.2723   2
  -1  -7 -12 27.4955  9.0611   1
   0  -9  13 49.3078 10.3202   2
   1  -9  13 27.2595 17.0226   3
   2  -9  13 -2.5932 15.3679   3
  -2  -8  13 52.5011 12.5127   2
  -2  -8  13 42.5750  9.6389   1
  -1  -8  13 -8.5554  8.4991   2
  -1  -8  13 0.00942 6.70113   1
   0  -8  13 133.663  22.973   3
   1  -8  13 29.6956 15.9836   3
   2  -8  13 76.3915 18.8898   3
   3  -8  13 -15.373  12.659   3
   4  -8  13 15.9600 15.6133   3
  -4  -7  13 155.507  16.567   1
  -3  -7  13 5.13951 9.02069   1
  -3  -7  13 -0.6170 10.3643   2
  -2  -7  13 332.932  24.542   2
  -2  -7  13 340.163  22.225   1
  -1  -7  13 -0.8337  6.5694   1
  -1  -7  13 -13.522  12.022   3
   0  -7  13 218.045  27.777   3
   0  -7  13 234.352  15.839   1
   1  -7  13 118.635  21.196   3
   1  -7  13 166.951  11.970   1
   2  -7  13  4.5240 11.8615   3
   3  -7  13 52.2345 16.5548   3
   4  -7  13 -15.941  11.539   3
   5  -7  13 78.3882 20.2793   3
  -5  -6  13 12.3249 11.0341   1
  -4  -6  13 1.49324 9.58904   1
  -3  -6  13 1.22919 8.26516   1
  -2  -6  13 10.6820  7.7837   1
  -1  -6  13 110.884  11.106   1
  -1  -6  13 103.778  18.815   3
   0  -6  13 114.143  19.428   3
   0  -6  13 157.488  12.754   1
   1  -6  13 360.853  20.957   1
   2  -6  13 10.7788  5.6130   1
   2  -6  13 -0.1462 10.6569   3
   3  -6  13 82.0173 17.2230   3
   3  -6  13 112.473  10.483   1
   4  -6  13  5.8674 12.7188   3
   5  -6  13  8.9900 14.6290   3
   6  -6  13  9.9202 16.3992   3
  -5  -5  13 11.8972 10.7116   1
  -4  -5  13 346.836  24.613   1
  -3  -5  13 4.35431 7.82935   1
  -2  -5  13 687.470  49.961   3
  -2  -5  13 639.224  35.727   1
  -1  -5  13 92.6250 16.2636   3
  -1  -5  13 83.9298 10.1806   1
   0  -5  13 475.917  24.570   1
   0  -5  13 368.599  34.452   3
   1  -5  13 73.1330 15.0577   3
   1  -5  13 131.891  11.467   1
   2  -5  13 -7.0202  5.2178   1
   2  -5  13 -2.3573  8.8307   3
   3  -5  13 225.806  16.309   1
   3  -5  13 222.353  25.129   3
   4  -5  13 173.759  23.987   3
   4  -5  13 173.075  15.754   1
   5  -5  13 27.9793 16.6310   3
   5  -5  13 43.6070  9.9741   1
   6  -5  13 74.7027 11.9617   1
   6  -5  13 19.9348 17.6333   3
  -6  -4  13 87.4751 15.4782   1
  -5  -4  13 16.4468 10.5761   1
  -4  -4  13 179.889  16.755   1
  -3  -4  13 -0.9517  7.1407   1
  -2  -4  13 5.80562 9.44855   3
  -2  -4  13 4.46114 6.92430   1
  -1  -4  13 595.676  46.786   3
  -1  -4  13 706.085  34.880   1
   0  -4  13 22.8048  9.6800   3
   0  -4  13 49.5118  7.4826   1
   1  -4  13 386.621  22.432   1
   2  -4  13 5.09165 6.29985   1
   2  -4  13 4.75071 8.90319   3
   3  -4  13 272.340  28.093   3
   3  -4  13 330.771  20.273   1
   4  -4  13 16.5593 12.7824   3
   4  -4  13 13.0421  7.6652   1
   5  -4  13 115.871  22.082   3
   5  -4  13 141.616  14.453   1
   6  -4  13 15.3449 16.1965   3
   6  -4  13 15.5037  8.6157   2
   7  -4  13 92.1210 22.1797   3
   7  -4  13 104.857  13.439   2
  -6  -3  13 72.4768 14.3588   1
  -5  -3  13 4.53781 9.19312   1
  -4  -3  13 484.862  29.585   1
  -3  -3  13 3.25010 7.24760   1
  -2  -3  13 1140.51   78.73   3
  -2  -3  13 1275.77   59.78   1
  -1  -3  13 -8.2251  6.5589   3
  -1  -3  13 6.25234 5.60096   1
   0  -3  13 129.784  12.020   1
   1  -3  13 3.64367 7.60278   3
   1  -3  13 -5.3395  5.4797   1
   2  -3  13 181.678  19.059   3
   2  -3  13 160.999  14.005   1
   3  -3  13 1.11682 6.42102   1
   3  -3  13 7.38575 9.95332   3
   4  -3  13 122.287  19.404   3
   5  -3  13 192.958  16.547   2
   5  -3  13 192.629  25.638   3
   6  -3  13 12.2100 14.8603   3
   6  -3  13 9.68336 8.75651   2
   7  -3  13 62.0858 19.4934   3
   7   2 -13 29.9044 11.1638   1
   6   2 -13 246.523  20.585   1
  -6  -2  13 265.854  22.769   1
   5   2 -13 -0.4305  7.0611   1
  -5  -2  13 6.66933 8.65003   1
   4   2 -13 438.193  26.884   1
  -4  -2  13 482.907  28.298   1
   3   2 -13 341.548  21.585   1
  -3  -2  13 356.732  22.597   1
   2   2 -13 217.155  14.253   1
  -2  -2  13 159.577  17.847   3
  -2  -2  13 189.535  15.376   1
   1   2 -13 1029.93   48.45   1
  -1  -2  13 897.508  48.743   1
  -1  -2  13 1011.02   64.38   3
   0   2 -13 9.37481 4.72690   1
   0  -2  13 2.50937 5.95084   1
   0  -2  13 14.4180  7.1624   3
   1  -2  13 1512.55   95.10   3
   1  -2  13 1460.32   71.29   1
   2  -2  13 344.041  26.604   3
   2  -2  13 283.324  19.238   1
   3  -2  13 13.4147  9.6957   3
   4  -2  13 150.618  20.939   3
   5  -2  13 69.6989 17.5732   3
   6  -2  13  4.7746 14.4021   3
   7  -2  13 98.2831 21.8782   3
   7   1 -13 29.9114 10.6556   1
   6   1 -13 40.4235 10.1864   1
   5   1 -13 0.92107 7.20605   1
  -5  -1  13 10.5948  8.7065   1
   4   1 -13 503.554  28.695   1
  -4  -1  13 483.015  29.342   1
   3   1 -13 193.785  14.476   1
  -3  -1  13 155.102  14.372   1
   2   1 -13 91.4209  9.4168   1
  -2  -1  13 87.2280 10.1323   1
   1   1 -13 517.157  29.832   1
  -1  -1  13 609.629  38.860   3
  -1  -1  13 558.260  30.645   1
   0   1 -13 8.65566 4.85202   1
   0  -1  13 4.88068 6.16221   1
   0  -1  13 13.0965  6.5550   3
  -1   1 -13 66.0937  7.4173   1
   1  -1  13 64.3493  8.4742   1
   1  -1  13 72.2625 10.7712   3
  -2   1 -13 274.322  17.802   1
   2  -1  13 295.268  24.537   3
   3  -1  13 117.110  16.663   3
   4  -1  13 104.839  18.378   3
   5  -1  13 575.400  47.568   3
   6  -1  13 11.6020 15.2865   3
   7  -1  13 193.812  27.882   3
   7   0 -13 2.53514 8.80472   1
   6   0 -13 538.090  32.300   1
   5   0 -13 -0.4226  6.9301   1
   4   0 -13 1055.35   51.38   1
  -4   0  13 943.244  50.955   1
   3   0 -13 719.268  37.436   1
  -3   0  13 693.682  37.664   1
   2   0 -13 111.373  10.469   1
  -2   0  13 125.492  11.673   1
   1   0 -13 591.157  30.907   1
  -1   0  13 562.128  31.391   1
   0   0 -13 94.1529  9.0540   1
   0   0  13 92.0264 10.2860   1
   0   0  13 103.734  12.602   3
  -1   0 -13 455.500  25.233   1
   1   0  13 471.092  33.209   3
   1   0  13 450.317  25.970   1
  -2   0 -13 225.075  17.336   1
   2   0  13 247.061  22.567   3
  -3   0 -13 -3.0898  6.4962   1
   3   0  13 -3.8340 10.0774   3
   4   0  13 97.4781 19.0171   3
   5   0  13 11.5675 15.0787   3
   6   0  13 22.9387 16.7360   3
   7   0  13 27.4102 17.9613   3
   7  -1 -13 5.10873 9.49762   1
   6  -1 -13 10.1213  8.3727   1
   5  -1 -13 95.8646 11.8682   1
   4  -1 -13 0.36339 6.07744   1
   3  -1 -13 1068.79   53.53   1
   2  -1 -13 42.0339  7.5328   1
  -2   1  13 25.7210  7.5924   1
   1  -1 -13 810.195  39.984   1
  -1   1  13 736.547  40.245   1
   0  -1 -13 16.2314  5.3884   1
   0   1  13 15.3900  6.9124   1
  -1  -1 -13 8.50119 5.59645   1
   1   1  13 9.71178 7.91642   3
   1   1  13 18.3159  7.2366   1
  -2  -1 -13 -0.5400  6.0058   1
   2   1  13 0.82835 9.26047   3
  -3  -1 -13 397.188  24.289   1
   3   1  13 311.699  31.872   3
  -4  -1 -13 -5.0951  7.1241   1
   4   1  13  1.8863 12.8092   3
   5   1  13 266.329  31.483   3
   6   1  13 26.4175 17.5995   3
   7  -2 -13 4.58236 9.00137   1
   6  -2 -13 711.157  39.545   1
   5  -2 -13 55.7060  9.9042   1
   4  -2 -13 231.353  18.645   2
   3  -2 -13 -3.6316  5.5835   1
   3  -2 -13 -1.0267  6.2440   2
   2  -2 -13 21.3561  7.0715   1
   2  -2 -13 29.5677  6.6721   2
   1  -2 -13 195.232  14.805   1
   1  -2 -13 176.826  13.872   2
   0  -2 -13 502.621  27.544   1
   0   2  13 489.494  28.356   1
  -1  -2 -13 133.508  12.490   1
   1   2  13 105.988  15.476   3
   1   2  13 111.847  12.301   1
  -2  -2 -13 193.451  17.724   1
   2   2  13 211.180  22.995   3
  -3  -2 -13 210.560  18.004   1
  -4  -2 -13 0.91885 7.90325   1
  -5  -2 -13 16.8386  9.2006   1
   5   2  13 -1.4075 14.7782   3
   6   2  13 94.3599 23.5313   3
   7  -3 -13 5.73881 9.01920   1
   6  -3 -13 30.0395  9.7536   1
   6  -3 -13 37.7969 11.7883   2
   5  -3 -13 315.377  25.382   2
   5  -3 -13 434.399  25.042   1
   4  -3 -13 3.49942 6.68761   1
   4  -3 -13 3.90206 8.43695   2
   3  -3 -13 491.677  28.429   1
   2  -3 -13 1.57513 5.95067   2
   2  -3 -13 0.78128 6.09724   1
   1  -3 -13 310.028  20.719   2
   1  -3 -13 354.706  21.363   1
   0  -3 -13 147.773  13.875   2
   0  -3 -13 135.891  12.823   1
  -1  -3 -13 10.9973  7.6003   1
  -2  -3 -13 8.80801 8.34118   1
  -3  -3 -13 338.307  24.110   1
  -4  -3 -13 7.35691 8.59129   1
  -5  -3 -13 184.977  17.952   1
   7  -4 -13 2.47149 8.25687   1
   7  -4 -13  7.2549 11.0274   2
   7  -4 -13 3.30546 7.98030   4
   6  -4 -13 128.032  15.729   2
   6  -4 -13 124.209  13.512   1
   5  -4 -13 -10.273   8.725   2
   5  -4 -13 12.9200  8.0324   1
   4  -4 -13 145.231  14.636   2
   4  -4 -13 126.240  12.976   1
   3  -4 -13 2.68513 7.56889   2
   3  -4 -13 -6.9064  6.2954   1
   2  -4 -13 198.302  16.622   2
   2  -4 -13 208.187  16.578   1
   1  -4 -13 39.0706  8.9762   2
   1  -4 -13 19.6229  7.5894   1
   0  -4 -13 95.5179 12.9881   2
   0  -4 -13 111.893  11.528   1
  -1  -4 -13 301.298  22.043   1
  -2  -4 -13 23.7734  9.9977   1
  -3  -4 -13 261.176  21.638   1
  -4  -4 -13 40.0749 11.0382   1
   6  -5 -13 58.4059 13.3381   2
   6  -5 -13 53.9993 10.3936   4
   6  -5 -13 69.7745 10.4759   1
   5  -5 -13 125.474  15.417   2
   5  -5 -13 169.199  14.762   1
   5  -5 -13 142.776  14.347   4
   4  -5 -13 11.7786  9.4351   2
   4  -5 -13 10.7390  7.1386   1
   3  -5 -13 168.227  15.011   1
   2  -5 -13 32.7728  8.4894   2
   2  -5 -13 33.3256  8.6703   1
   1  -5 -13 57.3970  9.8958   1
   1  -5 -13 49.9918  9.4113   4
   1  -5 -13 48.8730 10.5960   2
   0  -5 -13 68.3710 12.7503   2
   0  -5 -13 62.3014  9.7378   1
   0  -5 -13 70.0361  9.4916   4
  -1  -5 -13 14.0530  8.4353   1
  -2  -5 -13 -3.5499  8.2386   1
  -3  -5 -13 44.3578 12.1250   1
   5  -6 -13 88.0738 13.5485   2
   5  -6 -13 86.7321 12.9535   4
   4  -6 -13 15.6963 10.4963   2
   4  -6 -13 10.2728  6.9562   1
   4  -6 -13 9.09585 9.83053   4
   3  -6 -13 19.0620  9.4764   2
   3  -6 -13 -9.7498  6.1095   1
   3  -6 -13 20.1242 10.5118   4
   2  -6 -13 1.74112 8.78159   4
   2  -6 -13 6.18344 7.92282   2
   2  -6 -13 3.34913 7.12882   1
   1  -6 -13 37.7535  9.0578   1
   1  -6 -13 31.3518 10.7423   2
   1  -6 -13 25.8201  9.1800   4
   0  -6 -13 13.2031 10.4773   2
   0  -6 -13 2.58448 7.41115   1
  -1  -6 -13 196.025  17.268   1
  -2  -6 -13 0.88889 9.43374   1
   4  -7 -13  9.4337 10.6702   2
   4  -7 -13 -7.7399 10.3559   4
   3  -7 -13 99.3616 13.5177   2
   3  -7 -13 95.6615 14.3719   4
   2  -7 -13 42.9222 11.0975   4
   2  -7 -13 39.5855 10.5296   2
   2  -7 -13 31.9809  7.8935   1
   1  -7 -13 103.016  11.582   1
   1  -7 -13 86.6657 11.9186   4
   1  -7 -13 100.711  14.879   2
   0  -7 -13  4.4277 11.0212   2
   0  -7 -13 1.07999 7.72735   1
  -2  -8  14 26.2719  9.0682   1
  -2  -8  14 26.5673 11.7612   2
  -1  -8  14 96.8240 13.6139   2
  -1  -8  14 107.529  11.632   1
   0  -8  14  3.9475 14.6888   3
   1  -8  14 61.6134 18.7917   3
   2  -8  14  4.9157 14.1286   3
   3  -8  14 -9.1586 13.8721   3
   4  -8  14 -27.455  12.308   3
  -3  -7  14 0.39908 8.96099   1
  -2  -7  14 181.099  16.602   1
  -2  -7  14 182.054  18.010   2
  -1  -7  14 34.3241  8.7750   1
  -1  -7  14 18.1750 15.0930   3
   0  -7  14 -8.1982 12.4348   3
   0  -7  14 1.23806 6.36417   1
   1  -7  14 139.539  11.470   1
   1  -7  14 82.7302 18.8443   3
   2  -7  14 -8.1174 11.3663   3
   3  -7  14 48.2267 16.4369   3
   4  -7  14 53.2135 17.4950   3
   5  -7  14 103.008  22.378   3
  -4  -6  14 3.43074 9.66615   1
  -3  -6  14 146.318  15.370   1
  -2  -6  14 11.8427  8.3280   1
  -1  -6  14 387.842  23.461   1
  -1  -6  14 361.357  34.935   3
   0  -6  14 17.5256 12.6467   3
   0  -6  14 66.0980  8.9400   1
   1  -6  14 50.1671 14.6586   3
   2  -6  14  4.4799 11.0915   3
   2  -6  14 1.17598 5.90126   1
   3  -6  14 34.9185 14.8877   3
   3  -6  14 64.6330  8.4276   1
   4  -6  14 40.5119 15.8539   3
   5  -6  14 103.925  22.514   3
   6  -6  14 15.3173 17.3062   3
  -5  -5  14 19.6111 11.3761   1
  -4  -5  14 219.527  20.107   1
  -3  -5  14 28.7901  9.6391   1
  -2  -5  14 79.2820 16.8562   3
  -2  -5  14 101.452  11.970   1
  -1  -5  14 -5.1356  6.5805   1
  -1  -5  14 -0.3354 10.1582   3
   0  -5  14 31.1361  7.5925   1
   0  -5  14  2.9497 10.0841   3
   1  -5  14 0.09139 9.39887   3
   1  -5  14 7.12481 6.17883   1
   2  -5  14 141.382  18.323   3
   2  -5  14 80.0973 10.0947   1
   3  -5  14 233.614  26.531   3
   3  -5  14 267.763  18.165   1
   4  -5  14 -7.8250  7.8193   1
   4  -5  14  3.4472 12.4811   3
   5  -5  14 115.083  23.373   3
   5  -5  14 176.394  15.731   1
   6  -5  14 54.7501 12.0634   1
   6  -5  14 62.2247 20.8721   3
  -6  -4  14 156.377  18.953   1
  -5  -4  14 80.5394 14.2408   1
  -4  -4  14 152.084  16.066   1
  -3  -4  14 352.672  23.976   1
  -2  -4  14 -17.429   8.339   3
  -2  -4  14 -1.5509  7.0758   1
  -1  -4  14 551.557  47.513   3
  -1  -4  14 798.401  36.666   1
   0  -4  14 29.8350 10.4566   3
   0  -4  14 45.4885  7.8609   1
   1  -4  14 30.0865  7.5939   1
   1  -4  14 43.5062 11.7813   3
   2  -4  14 241.679  17.438   1
   2  -4  14 227.396  23.957   3
   3  -4  14 15.0043  8.1136   1
   3  -4  14 23.5814 12.0658   3
   4  -4  14  0.2154 11.4040   3
   4  -4  14 0.63596 7.84636   1
   5  -4  14 104.814  21.720   3
   5  -4  14 151.166  14.640   1
   6  -4  14 12.3628 16.0703   3
   6  -4  14  8.5499 10.0448   1
  -6  -3  14 65.6394 14.3608   1
  -5  -3  14 128.526  15.941   1
  -4  -3  14 143.863  15.295   1
  -3  -3  14 403.545  26.031   1
  -2  -3  14 -6.2746  8.1526   3
  -2  -3  14 -4.7507  6.2035   1
  -1  -3  14 58.7851  8.6974   1
  -1  -3  14 60.4992 11.5292   3
   0  -3  14 33.7621  7.9023   1
   0  -3  14 64.0827 11.3938   3
   1  -3  14 135.808  16.433   3
   1  -3  14 103.460  11.163   1
   2  -3  14 43.0224  8.4360   1
   2  -3  14 43.3679 11.2870   3
   3  -3  14 678.914  37.969   1
   3  -3  14 787.454  53.707   3
   4  -3  14 24.7547  9.4008   1
   4  -3  14 27.4213 13.2254   3
   5  -3  14 590.991  48.611   3
   6  -3  14 72.3162 19.3911   3
   7  -3  14 51.8123 18.3684   3
   7   2 -14 -0.9748  9.9265   1
   6   2 -14 211.817  19.775   1
  -6  -2  14 247.789  22.528   1
   5   2 -14 93.9765 12.5435   1
  -5  -2  14 98.3535 14.0328   1
   4   2 -14 153.350  14.289   1
  -4  -2  14 148.212  15.187   1
   3   2 -14 391.195  24.817   1
  -3  -2  14 448.738  26.397   1
   2   2 -14 163.994  12.997   1
  -2  -2  14 106.749  14.644   3
  -2  -2  14 158.702  13.945   1
   1   2 -14 221.961  15.423   1
  -1  -2  14 228.012  16.764   1
   0   2 -14 328.173  19.885   1
   0  -2  14 314.938  20.963   1
   0  -2  14 347.480  26.613   3
   1  -2  14 105.219  13.700   3
   1  -2  14 101.550  10.990   1
   2  -2  14 168.925  14.153   1
   2  -2  14 170.190  19.058   3
   3  -2  14 10.4914 10.0145   3
   4  -2  14 32.3441 13.7108   3
   5  -2  14 -0.2310 12.5423   3
   6  -2  14 267.376  30.488   3
   7  -2  14 -0.5773 14.6925   3
   7   1 -14 26.1467 11.2830   1
   6   1 -14 -7.9758  8.1261   1
   5   1 -14 696.430  38.241   1
  -5  -1  14 650.268  38.417   1
   4   1 -14 -0.3418  6.4705   1
  -4  -1  14 1.88673 7.93375   1
   3   1 -14 451.235  26.425   1
  -3  -1  14 434.669  26.745   1
   2   1 -14 2.48075 5.44406   1
  -2  -1  14 -9.7417  5.5585   1
   1   1 -14 31.6995  6.9247   1
  -1  -1  14 45.0578  8.6202   3
  -1  -1  14 30.2649  7.6858   1
   0   1 -14 2.46119 4.84638   1
   0  -1  14 -0.5608  6.3469   3
   0  -1  14 2.69330 6.13130   1
  -1   1 -14 823.334  41.940   1
   1  -1  14 825.224  42.871   1
   1  -1  14 869.933  56.395   3
  -2   1 -14 -0.7258  4.8572   1
   2  -1  14 -1.7337  7.4969   3
   2  -1  14 0.17897 6.50413   1
   3  -1  14 986.985  67.860   3
   4  -1  14 50.7486 15.1796   3
   5  -1  14 407.119  37.484   3
   6  -1  14 -0.6594 13.6950   3
   7   0 -14 -6.5768  8.9056   1
   6   0 -14 309.707  22.903   1
   5   0 -14 15.5446  8.3638   1
   4   0 -14 10.4477  7.5587   1
  -4   0  14 19.9382  8.6223   1
   3   0 -14 46.5671  8.5182   1
  -3   0  14 48.1994  9.3923   1
   2   0 -14 175.626  13.637   1
  -2   0  14 137.182  13.431   1
   1   0 -14 55.6787  7.9248   1
  -1   0  14 42.3354  8.6959   1
   0   0 -14 397.891  23.368   1
   0   0  14 401.422  29.741   3
   0   0  14 437.661  25.048   1
  -1   0 -14 320.414  19.897   1
   1   0  14 337.889  20.756   1
   1   0  14 327.140  25.841   3
  -2   0 -14 9.61210 6.71445   1
   2   0  14 6.67895 8.65611   3
  -3   0 -14 86.8485 12.3701   1
   3   0  14 99.1426 16.7444   3
   4   0  14 402.657  36.915   3
   5   0  14 25.1250 15.7077   3
   6   0  14 235.452  30.645   3
   7  -1 -14 227.370  20.506   1
   6  -1 -14 6.64093 8.51314   1
   5  -1 -14 634.212  36.143   1
   4  -1 -14 6.06022 7.29466   1
   3  -1 -14 353.504  22.482   1
   2  -1 -14 165.903  14.176   1
  -2   1  14 153.259  14.496   1
   1  -1 -14 46.9347  7.9713   1
  -1   1  14 53.3545  9.4420   1
   0  -1 -14 84.3945  9.2560   1
   0   1  14 109.228  11.421   1
  -1  -1 -14 310.708  19.912   1
   1   1  14 306.898  25.257   3
   1   1  14 321.034  20.927   1
  -2  -1 -14 1.12444 7.06079   1
   2   1  14  4.0057 10.5063   3
  -3  -1 -14 406.954  25.459   1
   3   1  14 279.881  31.016   3
  -4  -1 -14 123.492  14.431   1
   4   1  14 81.5794 19.8589   3
   5   1  14 35.2913 17.5861   3
   6   1  14  0.8928 15.8001   3
   7  -2 -14 89.9434 13.7635   1
   6  -2 -14 55.3507 11.1982   1
   5  -2 -14 10.5369  8.4530   1
   4  -2 -14 64.4086 10.3855   1
   3  -2 -14 5.86410 7.22941   2
   3  -2 -14 -14.585   5.635   1
   2  -2 -14 365.721  22.204   2
   2  -2 -14 345.968  22.676   1
   1  -2 -14 838.445  43.505   1
   0  -2 -14 18.4702  6.2047   1
   0   2  14 8.99361 7.45423   1
  -1  -2 -14 825.725  41.459   1
   1   2  14 720.601  40.756   1
  -2  -2 -14 98.2164 13.3935   1
   2   2  14 108.926  17.948   3
  -3  -2 -14 375.076  25.616   1
   3   2  14 330.857  33.268   3
  -4  -2 -14 128.694  15.161   1
   4   2  14 135.987  23.245   3
  -5  -2 -14 20.6145 10.2669   1
   5   2  14  1.0683 15.2935   3
   6   2  14 135.896  26.262   3
   7  -3 -14 133.900  15.385   1
   6  -3 -14 -2.6207  8.3498   1
   5  -3 -14 318.062  21.465   1
   5  -3 -14 233.308  22.197   2
   4  -3 -14 44.2815  9.4657   1
   4  -3 -14 46.1215 10.9486   2
   3  -3 -14 69.6591 10.5110   1
   3  -3 -14 111.932  11.938   2
   2  -3 -14 256.755  18.600   2
   2  -3 -14 282.859  19.624   1
   1  -3 -14 42.6752  8.1801   2
   1  -3 -14 50.9231  9.1218   1
   0  -3 -14 -6.2544  5.8317   1
  -1  -3 -14 68.9796 10.4973   1
  -2  -3 -14 258.202  21.891   1
  -3  -3 -14 68.0276 12.5722   1
  -4  -3 -14 118.300  15.115   1
  -5  -3 -14  8.3098 10.1953   1
   5   3  14  8.7633 17.2908   3
   6  -4 -14 -31.099   9.874   2
   6  -4 -14 0.06449 7.94667   1
   5  -4 -14 71.8807 11.0675   1
   5  -4 -14 51.3589 12.1083   2
   4  -4 -14 25.5926 10.5235   2
   4  -4 -14 17.7287  8.3552   1
   3  -4 -14 47.6366  9.5449   1
   3  -4 -14 64.9813 10.7241   2
   2  -4 -14 11.2746  7.8808   2
   2  -4 -14 15.2908  7.9771   1
   1  -4 -14 479.675  29.179   2
   1  -4 -14 481.527  28.515   1
   0  -4 -14 2.99718 6.40181   1
  -1  -4 -14 501.354  30.335   1
  -2  -4 -14 15.2705 10.0044   1
  -3  -4 -14 46.4196 12.3679   1
  -4  -4 -14 97.3565 14.9799   1
   6  -5 -14 -4.3745  7.4235   1
   6  -5 -14 4.09578 8.06240   4
   6  -5 -14 -35.678   9.873   2
   5  -5 -14 43.1349  9.5775   1
   5  -5 -14 57.9043 12.7829   2
   4  -5 -14 92.2229 11.9065   1
   4  -5 -14 159.924  15.726   2
   3  -5 -14 73.2653 11.6564   2
   3  -5 -14 58.4847 10.3119   1
   2  -5 -14 -0.8151  7.6794   1
   2  -5 -14 7.33326 8.34630   2
   1  -5 -14 3.59968 7.54316   4
   1  -5 -14 27.2285  9.7038   2
   1  -5 -14 23.7861  8.5500   1
   0  -5 -14 5.49360 9.93724   2
   0  -5 -14 11.9896  7.2045   4
   0  -5 -14 25.3663  8.2589   1
  -1  -5 -14 -0.7929  7.6356   1
  -2  -5 -14 192.023  19.196   1
  -3  -5 -14 13.9103 10.6553   1
   5  -6 -14 2.22123 9.34466   4
   5  -6 -14 25.9282 11.7306   2
   4  -6 -14 11.7522 11.1770   2
   4  -6 -14 4.16324 7.08232   1
   4  -6 -14 20.0707 10.2539   4
   3  -6 -14 19.3005 10.1612   4
   3  -6 -14 15.8361  7.9836   1
   3  -6 -14 47.6385 11.2274   2
   2  -6 -14 2.83073 7.34181   1
   2  -6 -14 2.13780 8.91836   2
   2  -6 -14 -5.1660  8.4526   4
   1  -6 -14 204.627  19.300   2
   1  -6 -14 208.131  16.511   1
   1  -6 -14 136.212  14.186   4
   0  -6 -14 0.28870 7.69906   1
   0  -6 -14  2.0178 10.8601   2
  -1  -6 -14 123.103  14.009   1
  -2  -6 -14 -7.5653  8.6655   1
   3  -7 -14 69.0930 13.0154   4
   2  -7 -14 -2.7541  8.7624   4
   2  -7 -14 14.6265 10.5801   2
   2  -7 -14 -6.9673  6.4953   1
   1  -7 -14 110.667  11.666   1
   1  -7 -14 113.735  14.762   2
   1  -7 -14 50.0311 10.5748   4
  -2  -8  15  8.5143 11.8554   2
  -1  -8  15 57.5793  9.9131   1
   0  -8  15  1.1861 15.1369   3
   1  -8  15 -1.3293 14.0539   3
   2  -8  15 -25.487  12.195   3
   3  -8  15 30.5526 17.3687   3
  -3  -7  15 -4.8680  9.3979   1
  -2  -7  15 4.91472 8.83906   1
  -1  -7  15 45.7669  9.5284   1
  -1  -7  15 21.2051 15.3001   3
   0  -7  15 29.5020 16.1863   3
   0  -7  15 74.3881  9.7063   1
   1  -7  15 204.096  15.204   1
   2  -7  15 -6.3562 11.3864   3
   3  -7  15 168.449  24.495   3
   4  -7  15 13.3607 14.7713   3
  -4  -6  15  4.7236 10.0876   1
  -3  -6  15 207.017  19.192   1
  -2  -6  15 8.78257 8.64637   1
  -1  -6  15 183.819  15.222   1
  -1  -6  15 101.829  20.706   3
   0  -6  15 99.3592 11.0871   1
   0  -6  15 37.7893 14.6471   3
   1  -6  15  5.1500 11.2220   3
   1  -6  15 9.97658 6.88009   1
   2  -6  15 37.5223 14.2533   3
   2  -6  15 61.7471  8.9090   1
   3  -6  15 14.5976 13.3027   3
   3  -6  15 13.0267  7.0047   1
   4  -6  15 36.9071  9.0549   1
   4  -6  15 60.8145 17.8323   3
   5  -6  15 14.3651 15.9433   3
  -5  -5  15 89.3373 15.4570   1
  -4  -5  15 -4.0777  9.8429   1
  -3  -5  15 19.7608  9.7525   1
  -2  -5  15 1.27430 7.99162   1
  -2  -5  15 -11.727  11.278   3
  -1  -5  15 65.7717 10.4328   1
  -1  -5  15 29.8689 13.4234   3
   0  -5  15 3.71347 6.79879   1
   0  -5  15  4.4080 10.0442   3
   1  -5  15 367.607  24.047   1
   1  -5  15 466.345  35.916   3
   2  -5  15  8.4664 11.0293   3
   2  -5  15 14.5086  7.4627   1
   3  -5  15 468.656  41.768   3
   3  -5  15 557.671  29.813   1
   4  -5  15 112.777  13.024   1
   4  -5  15 98.4840 20.0799   3
   5  -5  15 66.3895 19.7061   3
   5  -5  15 80.5249 12.8707   1
   6  -5  15 94.5827 14.1056   1
   6  -5  15 86.1645 21.9995   3
  -6  -4  15 27.0457 13.4257   1
  -5  -4  15 136.345  17.328   1
  -4  -4  15 21.3264 10.4042   1
  -3  -4  15 165.376  16.310   1
  -2  -4  15 202.668  16.736   1
  -2  -4  15 114.799  18.571   3
  -1  -4  15 163.519  14.959   1
  -1  -4  15 144.421  18.768   3
   0  -4  15 4.44992 7.13738   1
   0  -4  15 38.5896 11.3162   3
   1  -4  15 15.0128  7.3348   1
   1  -4  15 27.5018 10.9719   3
   2  -4  15 34.0184  8.6672   1
   2  -4  15 44.1777 12.7363   3
   3  -4  15 26.8217  9.0279   1
   3  -4  15 20.1039 12.4087   3
   4  -4  15 522.599  29.566   1
   4  -4  15 447.390  40.870   3
   5  -4  15 20.5011 15.3241   3
   5  -4  15 16.2443  9.6086   1
   6  -4  15 201.882  19.225   1
   6  -4  15 191.581  28.056   3
  -6  -3  15  2.0422 11.6856   1
  -5  -3  15 291.857  24.080   1
  -4  -3  15 37.4443 10.9476   1
  -3  -3  15 73.7246 11.7707   1
  -2  -3  15 -3.9848  8.6854   3
  -2  -3  15 3.46531 6.83755   1
  -1  -3  15 211.366  16.936   1
   0  -3  15 4.52129 6.68141   1
   0  -3  15 10.7183  8.8557   3
   1  -3  15 706.517  38.579   1
   1  -3  15 753.282  51.668   3
   2  -3  15 2.33575 8.99539   3
   2  -3  15 4.38946 7.15645   1
   3  -3  15 570.137  43.223   3
   3  -3  15 525.703  30.872   1
   4  -3  15 4.20722 8.31521   1
   4  -3  15 11.9576 12.4962   3
   5  -3  15 -9.0626 12.1409   3
   6  -3  15  1.6171 14.1842   3
   7   2 -15  2.9960 10.4610   1
   6   2 -15 4.81489 9.77805   1
   5   2 -15 23.1784  9.7164   1
  -5  -2  15 23.4245 10.6670   1
   4   2 -15 78.6014 11.6536   1
  -4  -2  15 76.5119 12.6098   1
   3   2 -15 231.059  17.709   1
  -3  -2  15 216.002  18.701   1
   2   2 -15 171.453  14.446   1
  -2  -2  15 165.058  15.744   1
   1   2 -15 316.492  20.591   1
  -1  -2  15 364.817  22.214   1
   0  -2  15 35.5187  9.6521   3
   0  -2  15 28.2597  8.0743   1
   1  -2  15 352.172  28.678   3
   1  -2  15 356.400  22.638   1
   2  -2  15 641.744  35.579   1
   2  -2  15 682.569  47.826   3
   3  -2  15 164.877  15.198   1
   3  -2  15 169.167  21.071   3
   4  -2  15 776.497  57.463   3
   5  -2  15 -7.7329 12.2364   3
   6  -2  15 186.864  26.403   3
   7   1 -15 190.634  19.519   1
   6   1 -15 3.87251 9.37461   1
   5   1 -15 328.382  23.363   1
  -5  -1  15 293.384  23.885   1
   4   1 -15 46.3947  9.8351   1
  -4  -1  15 46.0754 10.8328   1
   3   1 -15 20.6292  7.7056   1
  -3  -1  15 15.7121  8.0529   1
   2   1 -15 20.1292  7.1585   1
  -2  -1  15 20.8031  8.1711   1
   1   1 -15 175.272  14.095   1
  -1  -1  15 170.655  15.060   1
   0   1 -15 13.6373  5.8093   1
   0  -1  15 12.1974  7.2497   1
   0  -1  15 6.28100 7.37084   3
  -1   1 -15 510.296  28.241   1
   1  -1  15 529.287  29.494   1
   1  -1  15 520.272  37.824   3
   2  -1  15 232.352  17.799   1
   2  -1  15 243.311  22.681   3
   3  -1  15 -4.6300  9.4598   3
   4  -1  15 102.139  18.407   3
   5  -1  15  4.2035 13.4109   3
   6  -1  15  3.0195 14.4017   3
   7   0 -15 28.4996 11.2681   1
   6   0 -15 -7.8245  8.1345   1
   5   0 -15 8.90461 8.47418   1
   4   0 -15 219.138  18.353   1
   3   0 -15 343.072  22.076   1
  -3   0  15 309.610  22.586   1
   2   0 -15 -0.6447  5.7994   1
  -2   0  15 -9.5960  6.2940   1
   1   0 -15 1212.35   58.37   1
  -1   0  15 1140.00   58.68   1
   0   0 -15 279.077  18.679   1
   0   0  15 304.669  20.463   1
  -1   0 -15 813.698  42.594   1
   1   0  15 866.349  56.460   3
   1   0  15 837.530  43.715   1
  -2   0 -15 437.416  25.601   1
   2   0  15 411.905  26.255   1
   2   0  15 412.462  33.163   3
  -3   0 -15 23.3939  9.1381   1
   3   0  15 32.3806 12.9600   3
   4   0  15 280.558  29.747   3
   5   0  15 22.0072 15.4431   3
   6   0  15 57.6356 18.6847   3
   7  -1 -15 167.186  17.952   1
   6  -1 -15 31.6831 10.6572   1
   5  -1 -15 128.380  14.660   1
   4  -1 -15 179.387  16.505   1
   3  -1 -15 -12.894   5.899   1
   2  -1 -15 47.0353  8.7384   1
  -2   1  15 35.4485  9.0545   1
   1  -1 -15 22.3039  7.1358   1
  -1   1  15 18.3117  8.2961   1
   0  -1 -15 752.014  39.072   1
   0   1  15 738.666  39.935   1
  -1  -1 -15 1.96904 5.64041   1
   1   1  15 4.86782 8.10631   3
   1   1  15 -1.3115  6.8038   1
  -2  -1 -15 550.632  31.697   1
   2   1  15 500.110  40.141   3
  -3  -1 -15 -10.458   7.459   1
   3   1  15 -7.9518 11.5376   3
  -4  -1 -15 192.846  19.225   1
   4   1  15 193.336  26.676   3
   5   1  15 16.9534 16.1348   3
   6   1  15  3.8076 15.9897   3
   7  -2 -15 37.9801 11.8345   1
   6  -2 -15 30.4843 10.9224   1
   5  -2 -15 43.0742 10.7407   1
   4  -2 -15 -2.3600  7.5000   1
   3  -2 -15 520.445  30.814   1
   2  -2 -15 0.85667 6.91059   1
   1  -2 -15 1303.15   64.47   1
   0  -2 -15 13.7419  6.6166   1
  -1  -2 -15 170.391  14.582   1
   1   2  15 145.598  14.744   1
  -2  -2 -15 70.7169 11.9207   1
   2   2  15 68.2874 16.0420   3
  -3  -2 -15 4.48119 9.43993   1
   3   2  15 16.1839 14.3049   3
  -4  -2 -15 78.1165 14.0290   1
   4   2  15 71.6542 20.0177   3
   5   2  15 41.8763 19.0910   3
   6  -3 -15 116.592  14.830   1
   5  -3 -15 55.7318 11.2496   1
   4  -3 -15 -11.355   7.333   1
   4  -3 -15 17.1409  9.4698   2
   3  -3 -15 92.1886 11.8490   2
   3  -3 -15 77.0185 11.3662   1
   2  -3 -15 176.633  15.917   1
   2  -3 -15 159.217  14.982   2
   1  -3 -15 22.4910  8.1504   1
   0  -3 -15 719.449  38.622   1
  -1  -3 -15 39.6750  8.9534   1
  -2  -3 -15 608.226  37.082   1
  -3  -3 -15 0.34931 9.29515   1
  -4  -3 -15 63.9962 13.8190   1
   4   3  15 53.0984 19.5983   3
  -5  -3 -15 20.4740 11.5057   1
   5   3  15 14.1705 17.1351   3
   6  -4 -15 10.4393  9.3234   1
   5  -4 -15 34.1477 12.0273   2
   5  -4 -15 34.4627 10.0138   1
   4  -4 -15 -23.507   6.887   1
   4  -4 -15 -11.413   9.694   2
   3  -4 -15 196.459  17.974   1
   3  -4 -15 245.567  19.309   2
   2  -4 -15 12.3216  8.1376   2
   2  -4 -15 7.52068 8.06701   1
   1  -4 -15 206.294  17.353   1
   1  -4 -15 195.806  17.347   2
   0  -4 -15 7.87156 7.33180   1
  -1  -4 -15 -0.8742  7.3130   1
  -2  -4 -15 0.91125 9.00226   1
  -3  -4 -15 33.1193 11.6380   1
  -4  -4 -15 55.8788 13.5878   1
   5  -5 -15 168.576  16.156   1
   5  -5 -15 184.953  18.675   2
   4  -5 -15 -15.292   7.162   1
   4  -5 -15  5.5206 10.7796   2
   3  -5 -15 129.551  14.443   1
   3  -5 -15 174.952  16.236   2
   2  -5 -15 142.144  14.673   2
   2  -5 -15 135.117  14.368   1
   1  -5 -15 107.195  12.676   1
   1  -5 -15 97.9157 13.1381   2
   0  -5 -15 129.442  11.968   4
  -1  -5 -15 -0.2533  7.5293   1
  -2  -5 -15 171.602  17.786   1
   4  -6 -15 3.29465 7.63809   1
   4  -6 -15 36.0029 12.4615   2
   4  -6 -15 -11.209   9.537   4
   3  -6 -15 38.7941  9.4255   1
   3  -6 -15 15.9712 10.5273   4
   3  -6 -15 67.2719 12.9621   2
   2  -6 -15 125.919  13.352   1
   2  -6 -15 134.960  15.395   2
   1  -6 -15 -8.8011  7.7313   4
   1  -6 -15 19.9281 10.3641   2
   1  -6 -15 28.2647  9.1859   1
   0  -6 -15 86.7755 12.3379   1
  -1  -6 -15 1.96874 8.14331   1
  -1  -8  16 1.30637 7.91254   1
   0  -8  16 -9.9152 14.7223   3
   1  -8  16 -5.0992 14.0282   3
   2  -8  16 70.3354 19.6417   3
  -3  -7  16 20.6355 11.1200   1
  -2  -7  16 8.52751 9.58803   1
  -1  -7  16 63.8220 20.1432   3
  -1  -7  16 144.065  13.693   1
   0  -7  16 8.99862 7.93048   1
   0  -7  16  6.0177 13.8261   3
   1  -7  16 144.582  24.022   3
   1  -7  16 217.746  15.536   1
   2  -7  16 24.6702 14.6319   3
   3  -7  16 17.8911 15.0358   3
   4  -7  16  9.7473 14.6362   3
  -4  -6  16 28.0150 12.0488   1
  -3  -6  16 130.803  15.732   1
  -2  -6  16 7.26916 9.01459   1
  -1  -6  16 68.2438 18.2892   3
  -1  -6  16 111.120  12.777   1
   0  -6  16 93.0884 11.5957   1
   0  -6  16 61.0931 16.7970   3
   1  -6  16 15.9881 12.4279   3
   1  -6  16 23.6233  7.8548   1
   2  -6  16 299.754  31.264   3
   2  -6  16 341.645  21.237   1
   3  -6  16 -10.249   7.116   1
   3  -6  16 38.4467 14.9294   3
   4  -6  16 266.110  19.258   1
   4  -6  16 237.789  29.747   3
   5  -6  16 -2.4651 14.5678   3
  -5  -5  16 38.8809 13.2711   1
  -4  -5  16 -1.0374 10.0893   1
  -3  -5  16 8.37983 9.96878   1
  -2  -5  16 13.0610  9.2350   1
  -2  -5  16 -18.447  11.904   3
  -1  -5  16 192.379  24.750   3
  -1  -5  16 238.940  18.549   1
   0  -5  16 62.3210 10.2349   1
   0  -5  16 72.1768 15.5622   3
   1  -5  16 74.9385 10.7500   1
   2  -5  16 -0.9684  7.5518   1
   2  -5  16  1.0421 10.6486   3
   3  -5  16 -5.0436  7.3169   1
   3  -5  16  7.4575 12.1318   3
   4  -5  16 8.75019 8.93475   1
   4  -5  16 15.6332 14.0295   3
   5  -5  16 44.3035 18.5820   3
   5  -5  16 117.894  14.246   1
  -5  -4  16 174.228  19.655   1
  -4  -4  16 55.6453 12.6466   1
  -3  -4  16 337.039  24.652   1
  -2  -4  16 -1.8653 11.0797   3
  -2  -4  16 7.63308 8.66374   1
  -1  -4  16 340.484  29.735   3
  -1  -4  16 292.039  21.563   1
   0  -4  16 172.819  15.686   1
   1  -4  16 196.595  21.656   3
   1  -4  16 152.585  15.073   1
   2  -4  16 740.280  54.800   3
   2  -4  16 768.068  40.360   1
   3  -4  16 2.96060 8.45384   1
   3  -4  16  3.3634 11.4007   3
   4  -4  16 277.510  20.783   1
   4  -4  16 233.343  28.061   3
   5  -4  16 3.33637 9.96393   1
   5  -4  16  1.5769 13.3548   3
   6  -4  16 -12.788   9.376   1
   6  -4  16 13.8764 15.9707   3
  -6  -3  16 -2.8212 11.8067   1
  -5  -3  16 14.4712 11.3703   1
  -4  -3  16 16.2316 10.3037   1
  -3  -3  16 35.0700 10.9067   1
  -2  -3  16 155.524  15.095   1
  -2  -3  16 169.337  20.112   3
  -1  -3  16 127.359  13.200   1
   0  -3  16 243.528  22.750   3
   0  -3  16 179.202  16.476   1
   1  -3  16 10.5807  9.1450   3
   1  -3  16 7.28738 7.19517   1
   2  -3  16 449.949  36.729   3
   2  -3  16 471.356  27.894   1
   3  -3  16 30.0893  9.2877   1
   3  -3  16 28.4740 12.4606   3
   4  -3  16  9.0487 12.7250   3
   4  -3  16 4.69628 8.82076   1
   5  -3  16 110.330  14.842   1
   5  -3  16 93.8348 20.1718   3
   6  -3  16 11.6723 14.8767   3
   6  -3  16 18.8153 11.5430   1
   6   2 -16 67.0478 13.8624   1
   5   2 -16 133.654  15.487   1
  -5  -2  16 125.276  16.554   1
   4   2 -16 12.1376  8.5526   1
  -4  -2  16 6.91996 9.82723   1
   3   2 -16 577.283  33.555   1
  -3  -2  16 586.131  34.390   1
   2   2 -16 15.4249  7.4582   1
  -2  -2  16 22.7933  8.7605   1
   1   2 -16 456.165  27.627   1
  -1  -2  16 475.935  29.043   1
  -1  -2  16 540.545  36.917   3
   0  -2  16 452.214  27.431   1
   0  -2  16 472.518  35.094   3
   1  -2  16 11.2797  8.7179   3
   1  -2  16 13.6539  7.6598   1
   2  -2  16 228.922  18.031   1
   2  -2  16 227.396  23.012   3
   3  -2  16 45.2611 13.4760   3
   3  -2  16 40.4408  9.7372   1
   4  -2  16 122.011  14.966   1
   4  -2  16 125.081  20.209   3
   5  -2  16 111.227  20.752   3
   6  -2  16 -3.4550 13.5044   3
   6   1 -16 31.3399 11.4816   1
   5   1 -16 69.3247 12.9297   1
   4   1 -16 -0.0326  8.0768   1
  -4  -1  16 0.34234 9.21554   1
   3   1 -16 -7.2615  6.7356   1
  -3  -1  16 -1.7727  7.8204   1
   2   1 -16 421.912  25.039   1
  -2  -1  16 378.396  25.460   1
   1   1 -16 116.877  11.753   1
  -1  -1  16 123.515  13.021   1
   0   1 -16 1372.13   66.72   1
   0  -1  16 1396.90   67.74   1
   0  -1  16 1342.45   87.80   3
  -1   1 -16 4.12367 5.91540   1
   1  -1  16 3.24636 8.24124   3
   1  -1  16 -0.6699  7.3179   1
   2  -1  16 316.229  21.520   1
   2  -1  16 308.573  27.280   3
   3  -1  16 127.667  14.561   1
   3  -1  16 110.136  17.710   3
   4  -1  16  3.3994 12.0290   3
   5  -1  16  9.3640 13.5110   3
   6  -1  16 75.5359 19.8332   3
   7   0 -16  0.3933 10.4793   1
   6   0 -16  6.2142 10.2136   1
   5   0 -16 271.142  21.988   1
   4   0 -16 1.51501 8.05531   1
   3   0 -16 503.548  29.641   1
  -3   0  16 466.594  29.917   1
   2   0 -16 11.7907  7.0628   1
  -2   0  16 10.6331  8.1351   1
   1   0 -16 163.383  14.016   1
  -1   0  16 136.212  14.079   1
   0   0 -16 9.04546 6.43638   1
   0   0  16 10.3028  7.8508   1
  -1   0 -16 32.4163  7.2816   1
   1   0  16 41.9607  9.4321   1
   1   0  16 41.0544 10.5954   3
  -2   0 -16 41.4181  8.5730   1
   2   0  16 55.8257 12.6133   3
   2   0  16 46.4680 10.4458   1
   3   0  16 239.068  25.433   3
   4   0  16 25.2296 14.4591   3
   5   0  16 27.0478 15.8530   3
   6   0  16 20.9896 16.4804   3
   6  -1 -16 53.9540 12.3500   1
   5  -1 -16 132.187  15.292   1
   4  -1 -16 132.149  14.844   1
   3  -1 -16 116.645  13.258   1
   2  -1 -16 1004.03   51.54   1
   1  -1 -16 73.8693 10.2080   1
  -1   1  16 75.3139 11.3555   1
   0  -1 -16 1247.91   61.77   1
   0   1  16 1239.80   62.68   1
  -1  -1 -16 4.34463 6.19391   1
   1   1  16 -11.771   7.620   1
  -2  -1 -16 216.748  17.842   1
   2   1  16 195.572  18.929   1
   2   1  16 202.414  22.500   3
  -3  -1 -16 12.0220  9.7247   1
   3   1  16 33.2958 15.0113   3
   4   1  16 -7.7514 13.5844   3
   5   1  16  8.8016 15.2709   3
   6  -2 -16 10.0574 10.4749   1
   5  -2 -16 127.793  15.444   1
   4  -2 -16 8.56358 9.46083   1
   3  -2 -16 192.273  17.699   1
   2  -2 -16 113.756  12.998   1
   1  -2 -16 4.60138 6.85275   1
   0  -2 -16 22.2036  7.5849   1
  -1  -2 -16 270.786  19.588   1
  -2  -2 -16 8.70165 8.27277   1
  -3  -2 -16 113.113  15.655   1
   3   2  16 74.3893 19.1736   3
  -4  -2 -16 166.046  19.393   1
   4   2  16 164.044  26.078   3
   5   2  16 -13.881  15.527   3
   6  -3 -16 1.20528 9.50400   1
   5  -3 -16 84.3838 13.2672   1
   4  -3 -16 43.0983 11.3773   1
   3  -3 -16 167.111  15.942   1
   2  -3 -16 505.563  30.496   1
   1  -3 -16 5.00367 7.43519   1
   0  -3 -16 340.441  22.622   1
  -1  -3 -16 31.0361  9.1558   1
  -2  -3 -16 6.35508 8.82266   1
  -3  -3 -16  7.0291 10.0984   1
  -4  -3 -16 13.9638 10.9148   1
   5  -4 -16 -2.3386  8.7596   1
   4  -4 -16 84.7977 13.3041   1
   3  -4 -16 6.44286 8.97380   2
   3  -4 -16 0.13455 8.45687   1
   2  -4 -16 234.625  19.187   1
   1  -4 -16 26.1357  9.1374   1
   0  -4 -16 73.4121 11.1752   1
  -1  -4 -16 53.2939 10.5865   1
  -2  -4 -16 48.4822 11.2687   1
  -3  -4 -16  6.3476 10.5693   1
   5  -5 -16 112.215  13.847   1
   5  -5 -16 167.383  18.025   2
   4  -5 -16 13.7412 11.4970   2
   4  -5 -16 2.79844 8.60525   1
   3  -5 -16 -0.5293  8.3901   1
   3  -5 -16  1.3993 10.0410   2
   2  -5 -16 120.828  13.665   1
   2  -5 -16 110.989  13.930   2
   1  -5 -16 16.1439  8.9280   1
   1  -5 -16 19.1224  8.1427   4
   0  -5 -16 48.7911 10.4545   1
  -1  -5 -16 43.0074 10.4035   1
  -2  -5 -16 51.2144 11.7758   1
   3  -6 -16 -9.8244  8.8751   4
   3  -6 -16 11.9180  8.3485   1
   3  -6 -16  0.3344 10.8888   2
   2  -6 -16 159.171  16.461   2
   2  -6 -16 130.917  13.471   1
   2  -6 -16 107.072  13.444   4
   1  -6 -16 0.54988 8.14627   1
   1  -6 -16 1.75176 7.69449   4
   0  -6 -16 -1.2348  8.7399   1
   0  -8  17 101.035  22.762   3
   1  -8  17 -3.8954 14.8610   3
  -2  -7  17 53.8858 12.1942   1
  -1  -7  17 18.8654 16.7259   3
  -1  -7  17 30.7018  9.7134   1
   0  -7  17 27.5878 16.3274   3
   0  -7  17 36.4395  9.4815   1
   1  -7  17 12.4053  8.1773   1
   1  -7  17 16.9493 14.4363   3
   2  -7  17 -3.0442 13.3577   3
   3  -7  17 46.1434 17.7767   3
  -3  -6  17 106.999  15.221   1
  -2  -6  17 59.0908 11.7832   1
  -1  -6  17 49.3339 10.8508   1
  -1  -6  17 35.6761 16.1795   3
   0  -6  17 245.216  28.455   3
   0  -6  17 268.509  19.901   1
   1  -6  17 -2.5531 11.2141   3
   1  -6  17 1.91842 7.16297   1
   2  -6  17 161.922  22.312   3
   2  -6  17 92.1752 12.3352   1
   3  -6  17  9.6211 12.9149   3
   3  -6  17 9.79399 8.53977   1
   4  -6  17 11.0008 14.3301   3
   4  -6  17 4.23095 8.70947   1
  -4  -5  17 144.920  17.618   1
  -3  -5  17 11.4060 10.3131   1
  -2  -5  17 167.878  23.875   3
  -2  -5  17 198.108  18.479   1
  -1  -5  17 24.6298 14.0381   3
  -1  -5  17 28.5536  9.6543   1
   0  -5  17 238.128  18.728   1
   1  -5  17 25.8724  8.9761   1
   1  -5  17 37.8491 13.6642   3
   2  -5  17 23.0186 13.1961   3
   2  -5  17 15.7377  8.7033   1
   3  -5  17 39.7477 10.3550   1
   3  -5  17 56.9669 15.8521   3
   4  -5  17 13.1560 14.0436   3
   4  -5  17 8.77519 9.22706   1
   5  -5  17 15.2917 10.5847   1
   5  -5  17 10.2546 15.7132   3
  -5  -4  17 274.769  25.230   1
  -4  -4  17  5.0794 10.6754   1
  -3  -4  17 170.640  17.842   1
  -2  -4  17 91.2704 17.5729   3
  -2  -4  17 93.2740 13.2287   1
  -1  -4  17  5.6900 11.0959   3
  -1  -4  17 -3.6680  7.6342   1
   0  -4  17 77.0891 11.5283   1
   0  -4  17 92.3340 15.6657   3
   1  -4  17 85.3483 15.9002   3
   1  -4  17 110.113  12.475   1
   2  -4  17 133.699  18.791   3
   2  -4  17 109.479  13.008   1
   3  -4  17 105.119  13.469   1
   3  -4  17 114.504  19.095   3
   4  -4  17 -3.7265  9.3790   1
   4  -4  17 -0.2048 12.7150   3
   5  -4  17  4.7016 10.5129   1
   5  -4  17  4.4159 14.0609   3
  -6  -3  17 36.8716 14.4577   1
  -5  -3  17 18.2398 12.2179   1
  -4  -3  17 152.723  17.642   1
  -3  -3  17 17.7172 10.1414   1
  -2  -3  17 750.772  41.684   1
  -1  -3  17 16.2338  8.6193   1
  -1  -3  17 34.1373 11.6746   3
   0  -3  17 263.838  20.652   1
   0  -3  17 331.167  28.329   3
   1  -3  17 19.5115 10.4379   3
   1  -3  17 18.8022  8.4333   1
   2  -3  17 50.7630 13.4169   3
   2  -3  17 48.0511 10.2532   1
   3  -3  17 20.2835 12.5743   3
   3  -3  17 19.8963  9.7077   1
   4  -3  17 185.933  17.341   1
   4  -3  17 168.520  23.837   3
   5  -3  17  2.0490 13.6041   3
   5  -3  17  4.5266 10.1134   1
   6  -3  17 124.317  23.196   3
   6   2 -17 25.0339 12.0691   1
   5   2 -17 173.036  18.248   1
  -5  -2  17 166.114  19.311   1
   4   2 -17 9.71958 8.93301   1
  -4  -2  17  7.7992 10.3419   1
   3   2 -17 78.0891 11.7892   1
  -3  -2  17 71.4895 12.5920   1
   2   2 -17 8.83946 7.48338   1
  -2  -2  17 7.63368 8.43814   1
  -1  -2  17 90.8219 12.1597   1
   0  -2  17 35.8670 10.7882   3
   0  -2  17 23.5201  8.7107   1
   1  -2  17 258.309  18.981   1
   1  -2  17 228.165  23.053   3
   2  -2  17 63.8220 13.8778   3
   2  -2  17 63.9501 11.1459   1
   3  -2  17 66.3228 11.5493   1
   3  -2  17 65.6012 15.4292   3
   4  -2  17 74.5882 13.0913   1
   4  -2  17 63.6977 16.6852   3
   5  -2  17 13.4172 11.2809   1
   5  -2  17 13.7340 14.2066   3
   6  -2  17 40.3813 17.2340   3
   6   1 -17 32.2122 12.1758   1
   5   1 -17 84.4501 14.4319   1
   4   1 -17 437.211  28.967   1
  -4  -1  17 439.479  30.090   1
   3   1 -17 7.08449 8.46005   1
  -3  -1  17 -0.4423  8.9381   1
   2   1 -17 674.229  37.916   1
  -2  -1  17 713.062  39.149   1
   1   1 -17 4.53727 6.41752   1
  -1  -1  17 -1.8586  7.6950   1
   0   1 -17 202.087  15.640   1
   0  -1  17 197.774  17.036   1
  -1   1 -17 62.0121  9.4687   1
   1  -1  17 75.8769 13.0276   3
   1  -1  17 87.2925 11.8128   1
   2  -1  17 35.2081 11.8011   3
   2  -1  17 25.6420  9.4403   1
   3  -1  17 -3.1455  8.6365   1
   3  -1  17 -10.299  10.411   3
   4  -1  17 90.4585 18.3824   3
   4  -1  17 92.8293 14.7549   1
   5  -1  17 10.3224 14.2999   3
   6   0 -17 78.5445 14.2247   1
   5   0 -17 98.1365 14.5807   1
   4   0 -17 162.632  17.074   1
   3   0 -17 3.73520 8.10437   1
  -3   0  17 -2.2327  8.7335   1
   2   0 -17 148.808  14.136   1
  -2   0  17 151.397  15.351   1
   1   0 -17 257.444  18.703   1
  -1   0  17 264.900  20.265   1
   0   0 -17 14.2818  6.9925   1
   0   0  17 -2.0478  7.7189   1
  -1   0 -17 210.583  16.675   1
   1   0  17 242.370  18.979   1
  -2   0 -17 245.452  18.355   1
   2   0  17 229.617  19.391   1
   2   0  17 229.102  23.869   3
   3   0  17 -8.3122 10.7402   3
   3   0  17 -2.4013  9.9664   1
   4   0  17 253.943  28.613   3
   5   0  17 39.5757 16.6824   3
   6  -1 -17 13.9380 10.8885   1
   5  -1 -17 47.8550 12.0349   1
   4  -1 -17 194.899  18.404   1
   3  -1 -17 -0.3542  8.0540   1
   2  -1 -17 386.543  24.829   1
   1  -1 -17 197.561  15.961   1
  -1   1  17 151.425  15.649   1
   0  -1 -17 42.1911  8.9191   1
   0   1  17 63.6220 11.4490   1
  -1  -1 -17 154.740  14.591   1
   1   1  17 176.458  16.589   1
  -2  -1 -17 15.8015  8.4249   1
   2   1  17 16.7695 10.2034   1
  -3  -1 -17 37.1675 11.1377   1
   3   1  17 35.5884 15.2109   3
   3   1  17 43.5659 12.9601   1
   4   1  17  2.7153 13.9425   3
   5   1  17 116.950  23.383   3
   6  -2 -17 177.500  19.004   1
   5  -2 -17 -8.9175  8.8538   1
   4  -2 -17 231.033  20.553   1
   3  -2 -17 46.2460 10.9955   1
   2  -2 -17 166.311  15.533   1
   1  -2 -17 197.024  16.801   1
   0  -2 -17 70.0078 10.5527   1
  -1  -2 -17 16.2807  7.8367   1
  -2  -2 -17 343.974  24.374   1
  -3  -2 -17 3.62469 9.65192   1
  -4  -2 -17 135.090  17.985   1
   4   2  17 129.389  23.646   3
   6  -3 -17 -4.6199  9.5682   1
   5  -3 -17 -28.421   8.340   1
   4  -3 -17 13.2101 10.1979   1
   3  -3 -17 28.7847 10.4246   1
   2  -3 -17 52.5905 10.7996   1
   1  -3 -17 182.579  16.879   1
   0  -3 -17 20.1819  8.5026   1
  -1  -3 -17 6.68932 7.84964   1
  -2  -3 -17 22.7081  9.6861   1
  -3  -3 -17 50.1351 13.0129   1
  -4  -3 -17  6.7731 11.1957   1
   4  -4 -17 218.189  20.127   1
   3  -4 -17 3.31026 9.38197   1
   2  -4 -17 31.2269 10.0015   1
   1  -4 -17 -1.9184  7.8801   1
   0  -4 -17 33.9202  9.7273   1
  -1  -4 -17 13.2235  8.7668   1
  -2  -4 -17 100.182  14.044   1
  -3  -4 -17 -4.5057  9.3904   1
   4  -5 -17 -11.002   8.657   1
   3  -5 -17 99.2860 13.4888   1
   2  -5 -17 78.5730 12.1745   1
   1  -5 -17 41.9698 10.6395   1
   1  -5 -17 37.2713  9.4174   4
   0  -5 -17 69.5268 12.0430   1
  -1  -5 -17 1.98225 8.49683   1
  -1  -7  18 19.5755 10.0263   1
  -1  -7  18 -3.7208 15.9846   3
   0  -7  18 27.6138 17.0214   3
   0  -7  18 55.9838 10.8815   1
   1  -7  18 26.8592 15.4854   3
   1  -7  18 21.1944  9.0967   1
   2  -7  18 14.6919 15.6190   3
   3  -7  18 29.6356 17.1905   3
  -3  -6  18  9.2127 11.0027   1
  -2  -6  18 72.5871 13.1144   1
  -1  -6  18 51.0065 18.1729   3
  -1  -6  18 39.6383 11.0086   1
   0  -6  18 100.128  19.742   3
   0  -6  18 92.8176 13.0319   1
   1  -6  18 27.6437 14.1362   3
   1  -6  18 5.80173 8.50852   1
   2  -6  18 36.0110 15.0583   3
   2  -6  18 8.09639 8.73198   1
   3  -6  18 -10.059  11.818   3
   3  -6  18 -10.536   8.193   1
   4  -6  18 22.9790 15.8090   3
   4  -6  18 26.7692 10.2277   1
  -4  -5  18 314.232  25.865   1
  -3  -5  18 16.5367 10.9129   1
  -2  -5  18 165.117  24.792   3
  -2  -5  18 192.551  18.216   1
  -1  -5  18 -6.4548  8.2572   1
  -1  -5  18 12.7949 13.5821   3
   0  -5  18 40.9287 14.2451   3
   0  -5  18 14.2806  9.3976   1
   1  -5  18 21.0681  9.2417   1
   1  -5  18 33.0211 13.8711   3
   2  -5  18 86.3021 12.2742   1
   2  -5  18 87.7291 17.6788   3
   3  -5  18 -0.3246  8.6337   1
   3  -5  18 -1.9647 11.6545   3
   4  -5  18 101.088  13.657   1
   4  -5  18 67.8674 18.8605   3
   5  -5  18 -6.5206 13.3233   3
  -5  -4  18 27.2178 13.5964   1
  -4  -4  18  5.7327 11.0776   1
  -3  -4  18 61.6614 13.2431   1
  -2  -4  18 -7.0387 12.0408   3
  -2  -4  18 6.16631 9.57476   1
  -1  -4  18 177.120  21.724   3
  -1  -4  18 106.027  14.410   1
   0  -4  18 73.1252 12.0180   1
   0  -4  18 92.7180 16.3412   3
   1  -4  18 76.8783 15.8326   3
   1  -4  18 72.8501 11.4306   1
   2  -4  18 133.880  14.162   1
   2  -4  18 126.308  19.004   3
   3  -4  18  9.0867 12.3191   3
   3  -4  18 12.1296  9.6764   1
   4  -4  18 55.7433 16.9824   3
   4  -4  18 61.2771 12.7546   1
   5  -4  18 214.430  19.366   1
   5  -4  18 148.661  25.192   3
  -5  -3  18 24.8363 12.9942   1
  -4  -3  18 278.963  24.558   1
  -3  -3  18  5.9200 10.0329   1
  -2  -3  18 105.897  14.039   1
  -1  -3  18 23.8889 11.4267   3
  -1  -3  18 11.4504  8.9074   1
   0  -3  18 23.0763  9.1121   1
   0  -3  18 14.9342 10.9038   3
   1  -3  18 0.57306 8.13605   1
   1  -3  18 7.94838 9.70710   3
   2  -3  18 42.5976 13.4149   3
   2  -3  18 49.4823 10.7094   1
   3  -3  18 71.0705 12.5352   1
   3  -3  18 51.9377 15.5267   3
   4  -3  18 59.4500 17.1566   3
   4  -3  18 86.7856 13.6336   1
   5  -3  18 98.1161 21.2322   3
   5  -3  18 136.187  16.345   1
   5   2 -18 -6.5346  9.9836   1
  -5  -2  18  5.8837 12.0987   1
   4   2 -18 115.785  15.145   1
  -4  -2  18 97.2526 15.9549   1
   3   2 -18 25.2989 10.0801   1
  -3  -2  18 32.4773 11.6046   1
  -2  -2  18 0.46733 8.62024   1
  -1  -2  18 192.446  17.608   1
   0  -2  18 153.444  14.900   1
   0  -2  18 154.640  18.985   3
   1  -2  18 -0.3772  9.0520   3
   1  -2  18 -0.1237  7.8698   1
   2  -2  18 320.326  23.478   1
   2  -2  18 340.649  29.907   3
   3  -2  18 74.4893 16.3509   3
   3  -2  18 58.6530 12.2901   1
   4  -2  18 76.0244 17.8806   3
   4  -2  18 70.6442 13.2138   1
   5  -2  18 92.5471 20.1614   3
   5  -2  18 87.6160 15.1704   1
   6   1 -18 109.849  16.595   1
   5   1 -18 -0.3008 10.5046   1
   4   1 -18 104.799  14.994   1
  -4  -1  18 84.5075 15.2853   1
   3   1 -18 97.4893 13.5407   1
  -3  -1  18 95.0741 14.3557   1
   2   1 -18 96.6410 12.4694   1
  -2  -1  18 97.2215 13.5092   1
   1   1 -18 124.036  12.705   1
  -1  -1  18 132.960  14.515   1
   0   1 -18 -7.7799  5.8609   1
   0  -1  18 -1.7352  7.7093   1
   1  -1  18 23.6051  9.8250   1
   1  -1  18 28.3750 10.8935   3
   2  -1  18 0.65857 9.11691   1
   2  -1  18  9.7689 10.9981   3
   3  -1  18 384.976  26.228   1
   3  -1  18 368.115  33.722   3
   4  -1  18  4.9786 13.0734   3
   4  -1  18 17.5103 11.4679   1
   5  -1  18 163.402  24.719   3
   5  -1  18 185.290  19.818   1
   6   0 -18 206.575  21.006   1
   5   0 -18 -8.7842  9.6816   1
   4   0 -18 77.3495 13.7205   1
   3   0 -18 131.092  14.923   1
   2   0 -18 20.7941  8.4996   1
  -2   0  18 23.1504  9.9684   1
   1   0 -18 -0.3736  6.9223   1
  -1   0  18 3.97891 8.57876   1
   0   0 -18 639.944  34.688   1
   0   0  18 598.877  35.477   1
  -1   0 -18 3.19250 7.03186   1
   1   0  18 5.30850 9.18960   1
  -2   0 -18 313.309  21.706   1
   2   0  18 313.814  28.998   3
   2   0  18 320.094  23.672   1
   3   0  18  6.8072 10.4944   1
   3   0  18 -0.1757 11.7854   3
   4   0  18 -8.2213 12.7144   3
   4   0  18 10.9562 12.0844   1
   5   0  18 -1.7079 14.4466   3
   6  -1 -18 -4.5248 10.7358   1
   5  -1 -18 22.9156 11.7823   1
   4  -1 -18 81.9616 13.9076   1
   3  -1 -18 273.272  21.767   1
   2  -1 -18 7.61189 8.04816   1
   1  -1 -18 -3.9547  6.9581   1
   0  -1 -18 107.166  12.265   1
   0   1  18 98.4848 13.9907   1
  -1  -1 -18 177.735  15.910   1
   1   1  18 180.645  17.746   1
  -2  -1 -18 34.8682  9.8673   1
   2   1  18 30.1277 11.4052   1
  -3  -1 -18 507.865  32.579   1
   3   1  18 525.646  33.996   1
   4   1  18 13.8385 12.8760   1
   4   1  18 15.4660 15.3850   3
   6  -2 -18 88.0275 15.7157   1
   5  -2 -18 -31.021   8.937   1
   4  -2 -18  9.2411 10.4921   1
   3  -2 -18 7.29116 8.86234   1
   2  -2 -18 96.8653 12.6095   1
   1  -2 -18 64.2227 10.8038   1
   0  -2 -18 189.613  17.045   1
  -1  -2 -18 14.7009  7.8916   1
  -2  -2 -18 23.0991  9.4960   1
  -3  -2 -18 59.8965 12.6715   1
   5  -3 -18 76.7983 14.4612   1
   4  -3 -18 18.9455 10.9446   1
   3  -3 -18 6.46927 9.63772   1
   2  -3 -18 184.788  17.721   1
   1  -3 -18 2.83266 8.34064   1
   0  -3 -18 85.5426 12.1593   1
  -1  -3 -18 206.971  17.990   1
  -2  -3 -18 24.8763 10.0785   1
  -3  -3 -18 152.837  17.637   1
   4  -4 -18 -0.6461  9.9455   1
   3  -4 -18 -3.3452  9.1761   1
   2  -4 -18 -7.3777  8.0384   1
   1  -4 -18 71.9009 12.1727   1
   0  -4 -18 16.8527  9.4867   1
  -1  -4 -18 153.421  15.936   1
  -2  -4 -18 -8.9964  8.2238   1
   3  -5 -18 22.3746 10.1474   1
   2  -5 -18 129.400  14.477   1
   1  -5 -18 20.6301  8.2669   4
   1  -5 -18 -4.6131  8.2753   1
   0  -5 -18 31.6654 10.6745   1
  -1  -7  19 31.0612 18.2203   3
   0  -7  19  7.9706 15.4980   3
   0  -7  19 -11.341   8.337   1
   1  -7  19  4.9020 14.8124   3
   1  -7  19 5.93633 8.79204   1
   2  -7  19 29.3004 16.6783   3
  -2  -6  19 28.7254 11.5043   1
  -1  -6  19 70.7800 19.7996   3
  -1  -6  19 36.4025 11.3478   1
   0  -6  19 80.6052 13.1763   1
   0  -6  19 116.373  20.669   3
   1  -6  19 14.1294 13.8197   3
   1  -6  19 -11.941   7.998   1
   2  -6  19 47.5437 11.3960   1
   2  -6  19 42.4274 16.1365   3
   3  -6  19 61.6334 17.9691   3
   3  -6  19 82.0572 12.8801   1
  -4  -5  19 131.157  17.620   1
  -3  -5  19 -7.4751  9.6777   1
  -2  -5  19 -15.063  14.099   3
  -2  -5  19 0.52878 9.86134   1
  -1  -5  19 -1.7494 13.1858   3
  -1  -5  19 -20.563   8.620   1
   0  -5  19 -6.4662  8.7475   1
   0  -5  19  0.8556 12.1587   3
   1  -5  19 202.849  24.489   3
   1  -5  19 194.177  18.058   1
   2  -5  19 12.4874  9.6413   1
   2  -5  19 23.3425 13.8009   3
   3  -5  19 151.341  15.652   1
   3  -5  19 133.982  21.729   3
   4  -5  19 13.0966  9.8610   1
   4  -5  19  5.3120 13.5968   3
  -4  -4  19 -5.3434 10.7882   1
  -3  -4  19 58.7800 13.6320   1
  -2  -4  19 44.2117 12.5501   1
  -1  -4  19 11.3275  9.7539   1
  -1  -4  19 15.3182 12.7030   3
   0  -4  19 204.407  18.971   1
   0  -4  19 243.963  25.527   3
   1  -4  19 26.7725 13.2730   3
   1  -4  19 29.7759  9.7737   1
   2  -4  19 63.9582 11.7577   1
   2  -4  19 85.3861 16.5913   3
   3  -4  19 61.7922 12.3413   1
   3  -4  19 85.4934 17.8710   3
   4  -4  19 -0.3567 13.2267   3
   4  -4  19  1.5291 10.3063   1
   5  -4  19 54.5470 18.3018   3
  -5  -3  19 57.5275 15.5335   1
  -4  -3  19 34.3970 13.5079   1
  -3  -3  19 -9.4362 10.3032   1
  -2  -3  19 11.4824 10.3382   1
  -1  -3  19 28.4737 10.1093   1
   0  -3  19  4.7259 10.1892   3
   0  -3  19 3.99781 8.92337   1
   1  -3  19 409.591  34.334   3
   1  -3  19 414.482  26.449   1
   2  -3  19 52.3841 11.3514   1
   2  -3  19 49.0263 14.1359   3
   3  -3  19 382.595  35.228   3
   3  -3  19 403.547  27.170   1
   4  -3  19 16.1841 11.0450   1
   4  -3  19 14.0966 13.7480   3
   5  -3  19 75.5618 19.1777   3
  -5  -2  19 22.6586 13.4154   1
  -4  -2  19 -27.494   9.982   1
  -3  -2  19 17.1309 11.1541   1
  -2  -2  19 239.289  21.198   1
  -1  -2  19 1.33052 8.78863   1
   0  -2  19 191.888  17.695   1
   1  -2  19 17.7686  9.2279   1
   1  -2  19 -1.7701  9.5186   3
   2  -2  19 -4.1545  9.1474   1
   2  -2  19 -9.2321 10.1691   3
   3  -2  19 1.31134 9.54519   1
   3  -2  19  0.3571 12.1731   3
   4  -2  19 111.747  15.685   1
   4  -2  19 81.3035 19.4330   3
   5  -2  19  5.7231 11.1337   1
   5  -2  19  1.0142 14.0574   3
   5   1 -19 40.2066 13.5884   1
   4   1 -19  3.4320 10.7071   1
  -4  -1  19 -9.4100 11.2716   1
   3   1 -19 55.4874 12.6241   1
  -3  -1  19 69.7514 13.4987   1
   2   1 -19 137.909  14.856   1
  -2  -1  19 133.168  15.867   1
   1   1 -19 196.115  16.688   1
  -1  -1  19 220.315  19.050   1
   0   1 -19 85.6868 11.1247   1
   0  -1  19 95.5184 12.9988   1
   1  -1  19 579.293  34.457   1
   2  -1  19 34.4580 11.5565   1
   2  -1  19 40.8352 13.7816   3
   3  -1  19 344.552  32.823   3
   3  -1  19 353.151  25.786   1
   4  -1  19 -3.7704 13.0709   3
   4  -1  19 -5.6218 10.4151   1
   5  -1  19 27.4983 16.3428   3
   5   0 -19 -29.001   9.756   1
   4   0 -19 59.4986 13.7178   1
   3   0 -19 68.4157 12.7588   1
   2   0 -19 114.883  13.665   1
  -2   0  19 112.114  14.841   1
   1   0 -19 141.846  14.751   1
  -1   0  19 167.629  16.570   1
   0   0 -19 40.5711  9.4184   1
   0   0  19 38.7623 11.2120   1
  -1   0 -19 254.545  19.351   1
   1   0  19 226.170  20.992   1
   2   0  19 116.935  15.763   1
   3   0  19 58.2196 16.8243   3
   3   0  19 59.9671 13.5982   1
   4   0  19 111.394  17.131   1
   4   0  19 101.891  20.688   3
   5  -1 -19 18.1224 11.8578   1
   4  -1 -19 230.128  21.659   1
   3  -1 -19 -3.6412  8.8338   1
   2  -1 -19 81.8331 12.0157   1
   1  -1 -19 195.989  17.459   1
   0  -1 -19 56.9922 10.5729   1
   0   1  19 60.1714 12.3567   1
   1   1  19 387.905  27.838   1
  -2  -1 -19 26.5829  9.3218   1
   2   1  19 32.3866 12.3233   1
   3   1  19 98.5296 16.4726   1
   4   1  19 38.3913 14.7568   1
   5  -2 -19 -18.879  10.057   1
   4  -2 -19  5.6707 11.1047   1
   3  -2 -19 104.689  14.369   1
   2  -2 -19 -4.0140  7.8341   1
   1  -2 -19 309.538  22.404   1
   0  -2 -19 9.05368 8.44298   1
  -1  -2 -19 237.178  19.606   1
  -2  -2 -19 107.207  14.184   1
  -3  -2 -19 19.1008 10.7454   1
   4  -3 -19 122.488  16.457   1
   3  -3 -19 -5.3757  9.4002   1
   2  -3 -19 83.7574 12.6800   1
   1  -3 -19 0.90664 8.42713   1
   0  -3 -19 4.67088 8.43341   1
  -1  -3 -19 13.0095  9.1308   1
  -2  -3 -19 38.4008 11.1534   1
   3  -4 -19 174.491  17.693   1
   2  -4 -19 1.59502 8.70957   1
   1  -4 -19 341.111  24.392   1
   0  -4 -19 -1.7833  8.7783   1
  -1  -4 -19 133.446  15.595   1
  -2  -6  20 36.5026 12.0589   1
  -1  -6  20 16.6795 16.1957   3
  -1  -6  20 -7.6592  9.8230   1
   0  -6  20 21.7661 15.6035   3
   0  -6  20  3.8413 10.5731   1
   1  -6  20 3.48275 9.68479   1
   1  -6  20 20.3223 14.9954   3
   2  -6  20 13.9202 10.1191   1
   2  -6  20 12.5605 14.2213   3
   3  -6  20 12.9196 14.1130   3
  -3  -5  20  1.4233 11.7282   1
  -2  -5  20 -26.691   9.409   1
  -1  -5  20 129.119  16.318   1
  -1  -5  20 158.731  23.546   3
   0  -5  20 19.8235 13.8337   3
   0  -5  20 -0.9630  9.7191   1
   1  -5  20 365.715  25.424   1
   2  -5  20 10.3523 12.8568   3
   2  -5  20 2.97557 9.38382   1
   3  -5  20 60.0610 12.2138   1
   3  -5  20 62.7719 17.2106   3
  -4  -4  20 22.3129 12.9827   1
  -3  -4  20 -10.873  10.528   1
  -2  -4  20 33.2263 12.1149   1
  -1  -4  20 48.0782 12.2572   1
   0  -4  20 -3.7450 11.1033   3
   0  -4  20 1.52697 8.98559   1
   1  -4  20 30.4859 14.0110   3
   1  -4  20 20.0409  9.9660   1
   2  -4  20 153.470  15.814   1
   2  -4  20 135.351  20.796   3
   3  -4  20 -9.7372  8.8283   1
   3  -4  20 -2.5275 11.9828   3
   4  -4  20 93.8947 19.9435   3
   4  -4  20 104.536  15.105   1
  -4  -3  20 -13.572  11.657   1
  -3  -3  20 56.0566 13.9775   1
  -2  -3  20 61.9999 12.8961   1
  -1  -3  20 304.956  23.549   1
   0  -3  20 18.3569  9.6924   1
   1  -3  20 261.329  20.575   1
   1  -3  20 263.590  26.970   3
   2  -3  20 -2.0182  8.9229   1
   2  -3  20  3.1688 11.8411   3
   3  -3  20 37.4680 14.8700   3
   3  -3  20 30.9580 11.7368   1
   4  -3  20 -14.618  10.382   1
   4  -3  20 -6.9558 12.5302   3
  -4  -2  20  2.3642 12.6142   1
  -3  -2  20 157.057  18.633   1
  -2  -2  20 14.6797 10.6820   1
  -1  -2  20 254.686  21.091   1
   0  -2  20 150.578  15.831   1
   1  -2  20 146.724  15.649   1
   2  -2  20 143.159  16.087   1
   2  -2  20 124.619  19.529   3
   3  -2  20 -2.5418 12.3510   3
   3  -2  20 -9.4983  9.8720   1
   4  -2  20 91.7519 20.7200   3
   4  -2  20 112.227  16.331   1
   5   1 -20 -22.987  10.920   1
   4   1 -20 43.9329 13.7033   1
   3   1 -20 18.0438 10.8535   1
  -3  -1  20 19.9293 11.7675   1
   2   1 -20 18.5470  9.6917   1
  -2  -1  20 25.3144 11.1675   1
   1   1 -20 253.603  19.592   1
  -1  -1  20 260.874  21.407   1
   0  -1  20 65.4359 12.2045   1
   1  -1  20 77.6217 13.1182   1
   2  -1  20 112.269  15.910   1
   3  -1  20  5.3401 11.2441   1
   3  -1  20 -2.7630 12.7588   3
   4  -1  20 35.5339 13.6115   1
   4  -1  20 34.2730 16.7388   3
   5   0 -20 51.6688 14.2769   1
   4   0 -20 -2.6138 10.7825   1
   3   0 -20 409.968  28.722   1
   2   0 -20 20.7407  9.7183   1
  -2   0  20 19.7232 11.0894   1
   1   0 -20 368.288  24.469   1
  -1   0  20 344.787  25.483   1
   0   0 -20 88.2915 12.1256   1
   0   0  20 96.6931 14.0948   1
  -1   0 -20 105.315  13.237   1
   1   0  20 113.883  15.542   1
   2   0  20 147.550  17.789   1
   3   0  20 82.5276 15.7893   1
   4   0  20  7.3061 12.7098   1
   4   0  20 -5.6471 14.3921   3
   5  -1 -20 -3.2300 11.3388   1
   4  -1 -20 14.1910 11.8906   1
   3  -1 -20 -3.9936  9.4125   1
   2  -1 -20 57.6394 11.3957   1
   1  -1 -20 3.94297 8.34415   1
   0  -1 -20 156.089  15.638   1
  -1  -1 -20 2.48358 8.24359   1
   1   1  20  2.4494 11.1335   1
  -2  -1 -20 166.180  16.873   1
   2   1  20 164.694  19.580   1
   3   1  20 -7.8745 12.0176   1
   4  -2 -20 17.2264 11.7772   1
   2  -2 -20 14.6830  9.3599   1
   1  -2 -20 206.774  18.569   1
   0  -2 -20 -4.0345  8.0721   1
  -1  -2 -20 -3.9743  8.2922   1
  -2  -2 -20 17.0210  9.8555   1
  -3  -2 -20  7.1073 10.3804   1
   4  -3 -20  7.3655 11.1373   1
   3  -3 -20 87.2586 14.0719   1
   2  -3 -20 85.9868 13.0566   1
   1  -3 -20 12.3081  9.1170   1
   0  -3 -20 126.305  14.871   1
  -1  -3 -20 23.0409 10.3668   1
  -2  -3 -20 26.4407 10.7256   1
   2  -4 -20 24.1816 10.4603   1
   1  -4 -20 49.5337 11.5780   1
   0  -4 -20 19.0097  9.9192   1
  -1  -6  21 11.0722 16.5130   3
   0  -6  21 62.6785 18.3779   3
   0  -6  21 44.1402 13.0514   1
   1  -6  21  0.8224 13.2630   3
   1  -6  21  3.7984 10.1199   1
  -2  -5  21 -16.552  10.108   1
  -1  -5  21 117.695  16.275   1
   0  -5  21 -9.9298  9.8149   1
   0  -5  21 23.4498 14.6529   3
   1  -5  21 32.6249 14.8119   3
   1  -5  21 32.2125 11.1847   1
   2  -5  21 13.0770 10.0254   1
   2  -5  21 -4.8724 13.0845   3
   3  -5  21  7.3143 13.7271   3
  -3  -4  21 67.0645 14.8401   1
  -2  -4  21 31.2891 12.5668   1
  -1  -4  21 113.137  15.541   1
   0  -4  21 109.903  14.605   1
   0  -4  21 106.425  18.807   3
   1  -4  21  4.9035 12.1110   3
   1  -4  21 2.35483 8.95690   1
   2  -4  21 94.1336 13.6555   1
   2  -4  21 71.9380 17.5288   3
   3  -4  21  9.5836 13.6356   3
   3  -4  21 15.7235 10.4825   1
  -4  -3  21 -27.286  11.089   1
  -3  -3  21 49.6630 14.6335   1
  -2  -3  21 31.5210 12.0309   1
  -1  -3  21 16.7590 10.5775   1
   0  -3  21 107.983  14.248   1
   1  -3  21 -1.9349 11.3193   3
   1  -3  21 -8.5693  8.4076   1
   2  -3  21 44.7516 11.6387   1
   2  -3  21 23.9204 13.8892   3
   3  -3  21  6.6064 10.6280   1
   3  -3  21 13.5031 13.8779   3
   4  -3  21 29.2565 16.3499   3
  -4  -2  21  2.5550 12.8932   1
  -3  -2  21 293.519  25.825   1
  -2  -2  21  6.7852 10.7761   1
  -1  -2  21 81.8064 13.7291   1
   0  -2  21 124.783  15.055   1
   1  -2  21 8.36162 9.68523   1
   2  -2  21  0.4483 11.7710   3
   2  -2  21 5.42928 9.78752   1
   3  -2  21 123.102  21.854   3
   3  -2  21 177.596  18.745   1
   4  -2  21 23.2007 16.2668   3
   5   1 -21 -14.007  11.688   1
   4   1 -21 29.8265 13.5880   1
   3   1 -21 -3.5925 10.3716   1
  -3  -1  21 -10.359  10.711   1
   2   1 -21 225.406  19.918   1
  -2  -1  21 205.304  20.071   1
  -1  -1  21 13.0322 10.6593   1
   0  -1  21 240.555  20.911   1
   1  -1  21  2.9781 10.0398   1
   2  -1  21  0.2195 10.7554   1
   3  -1  21 40.2160 13.2974   1
   4  -1  21 75.3555 19.9951   3
   4   0 -21 -13.811  10.940   1
   3   0 -21 171.790  18.594   1
   2   0 -21 4.65091 9.53577   1
   1   0 -21 2.44462 8.38517   1
  -1   0  21 -12.001   9.820   1
   0   0 -21 14.6830  8.7394   1
   0   0  21 -4.7525 10.1246   1
   1   0  21 61.1688 13.9587   1
   2   0  21 28.4332 13.5361   1
   3   0  21 72.7673 15.9562   1
   4  -1 -21 105.509  16.609   1
   3  -1 -21 19.6440 11.3838   1
   2  -1 -21 204.139  19.170   1
   1  -1 -21 12.2502  9.3235   1
   0  -1 -21 45.6172 10.9466   1
  -1  -1 -21 43.4888 11.4635   1
   4  -2 -21 77.1096 15.1488   1
   3  -2 -21  8.3173 10.2706   1
   2  -2 -21 45.7648 11.3330   1
   1  -2 -21 -1.0232  8.5608   1
   0  -2 -21 -1.1571  8.7451   1
  -1  -2 -21 12.9191 10.1392   1
   3  -3 -21  6.1722 10.7880   1
   2  -3 -21 60.9831 12.4892   1
   1  -3 -21 43.1238 11.4566   1
   0  -3 -21 29.4953 10.6848   1
  -1  -5  22  1.1596 11.1431   1
   0  -5  22  2.5782 10.4212   1
   1  -5  22 -6.3196  9.9658   1
   1  -5  22 -12.740  12.097   3
   2  -5  22 19.3508 14.0767   3
  -2  -4  22 28.1551 12.9734   1
  -1  -4  22  3.0956 10.3791   1
   0  -4  22 34.0456 11.7672   1
   1  -4  22 89.8883 13.6843   1
   1  -4  22 91.6539 18.1055   3
   2  -4  22 16.8457 10.3321   1
   2  -4  22  3.8083 13.3729   3
   3  -4  22 -6.3735 13.1533   3
  -3  -3  22  4.3516 12.1637   1
  -2  -3  22 102.895  15.862   1
  -1  -3  22 -2.0790 10.0286   1
   0  -3  22 12.5318 10.0305   1
   1  -3  22 52.9113 12.1763   1
   2  -3  22 91.4792 14.0886   1
   2  -3  22 70.6538 17.0819   3
   3  -3  22 21.5928 11.9121   1
   3  -3  22 13.7089 14.9930   3
  -4  -2  22 -11.418  13.167   1
  -3  -2  22  6.1173 12.2271   1
  -2  -2  22 -12.226  10.333   1
  -1  -2  22 66.0321 13.2788   1
   0  -2  22 54.9632 12.3368   1
   1  -2  22 20.1176 10.6437   1
   2  -2  22 82.4914 14.4288   1
   3  -2  22  7.8633 13.8439   3
   3  -2  22 -2.8139 11.0884   1
   4   1 -22 104.298  17.288   1
   3   1 -22 -1.4378 10.9772   1
  -2  -1  22 65.9379 14.3747   1
  -1  -1  22 80.8106 14.2862   1
   0  -1  22 -4.8988  9.8910   1
   1  -1  22  3.8510 10.6705   1
   2  -1  22 68.8562 14.5974   1
   3  -1  22 -1.4019 12.2635   1
   4   0 -22 37.0771 14.1991   1
   3   0 -22 -1.5377 10.8062   1
   2   0 -22 11.7435 10.3324   1
   1   0 -22 2.59231 8.70414   1
   0   0 -22 111.253  14.543   1
   0   0  22 115.324  16.281   1
   1   0  22  9.9435 11.6162   1
   2   0  22 210.422  22.256   1
   3  -1 -22 69.5835 14.2188   1
   2  -1 -22 14.6908 10.4528   1
   1  -1 -22 50.2368 11.8248   1
   0  -1 -22 -0.4446  9.0078   1
  -1  -1 -22 -0.8220  9.4283   1
   3  -2 -22  5.0776 10.7756   1
   2  -2 -22 43.0526 11.9330   1
   1  -2 -22 3.73666 9.56236   1
   0  -2 -22 127.920  15.789   1
  -1  -2 -22 -1.5966  9.9213   1
  -1  -4  23  1.0919 10.5295   1
   0  -4  23 116.507  16.082   1
   1  -4  23  4.3321 10.2949   1
  -2  -3  23  1.3586 10.9398   1
  -1  -3  23 10.6477 10.6638   1
   0  -3  23  7.1559 10.1071   1
   1  -3  23  4.2733 10.1708   1
  -3  -2  23  0.8945 12.4299   1
  -2  -2  23 126.016  17.541   1
  -1  -2  23 -3.8643 10.2654   1
   0  -2  23 246.885  21.912   1
   1  -2  23 22.1024 11.3667   1
   2  -2  23 149.960  17.771   1
  -2  -1  23  8.3320 11.9033   1
  -1  -1  23  3.7023 10.7144   1
   0  -1  23 -4.0896 10.5790   1
   1  -1  23 64.7643 14.2564   1
   2  -1  23 -0.9197 11.6250   1
   3   0 -23 31.0202 13.1783   1
   2   0 -23 142.444  16.873   1
   1   0 -23 -1.0790  9.0619   1
   0   0  23 173.487  19.442   1
   1   0  23  0.6472 12.2513   1
   2  -1 -23 83.2192 14.8739   1
   1  -1 -23 31.8694 11.1547   1
   0  -1 -23 117.753  15.774   1
  -2  -2  24 61.2308 14.9119   1
  -1  -2  24 -0.8965 10.8506   1
   0  -2  24 27.6333 11.7149   1
  -1  -1  24 171.278  19.022   1
   0  -1  24  8.5222 11.7804   1
   0   0   0    0.00    0.00   0
;
_shelx_hkl_checksum   33677
