# Supplementary material
Source: MDPI journal article supplement (https://www.mdpi.com/2304-6740/7/10/122)
Supplement: s1 [file s1 › MnH10As4O16.cif]

data_global       

_publ_contact_author_name
  
;       
Matthias Weil       
;       
  
_publ_contact_author_address  
  
;  
Institute for Chemical Technologies and Analytics
Division of Structural Chemistry
TU Wien
Getreidemarkt 9/164-SC
A-1060 Vienna
Austria       
;  
  
_publ_contact_author_phone      '+43 1 58801 17122'
_publ_contact_author_fax        '+43 1 58801 17199'  
_publ_contact_author_email      'matthias.weil@tuwien.ac.at'
_publ_contact_letter
;
Please consider this CIF submission as supporting information
for Inorganic Chemistry.
;
_publ_requested_journal
;
data deposition
;
_publ_requested_category
;
;
_publ_requested_coeditor_name   ?
_journal_date_recd_electronic      ?
_journal_date_to_coeditor       ?
_journal_date_from_coeditor     ?       
_journal_date_accepted     ?
_journal_date_printers_first    ?       
_journal_date_printers_final    ?       
_journal_date_proofs_out        ?       
_journal_date_proofs_in ?       
_journal_coeditor_name  ?       
_journal_coeditor_code     ?
_journal_paper_category      ?
_journal_coeditor_notes   ?       
_journal_techeditor_code      ?
_iucr_compatibility_tag          ?
_journal_techeditor_notes ?       
_journal_coden_ASTM     ?       
_journal_name_full      ?       
_journal_year   ?       
_journal_volume ?       
_journal_issue  ?       
_journal_page_first     ?       
_journal_page_last      ?       
_journal_suppl_publ_number      ?       
_journal_suppl_publ_pages       ?       
  
_publ_section_title             
;   
data deposition
;
loop_       
  
 _publ_author_name       
 _publ_author_address       

'Weil, Matthias'
;  
Institute for Chemical Technologies and Analytics
Division of Structural Chemistry
TU Wien
Getreidemarkt 9/164-SC
A-1060 Vienna
Austria       
; 

_publ_section_abstract
;
;
_publ_section_comment
;
;
_publ_section_exptl_prep
;
;

_publ_section_exptl_refinement
;
;

_publ_section_references
;


;
_publ_section_acknowledgements
;
;

_publ_section_figure_captions
;
;
    
 
data_MnAs4H10O16
 
_audit_creation_method            'SHELXL-2018/3'
_shelx_SHELXL_version_number      '2018/3'
_chemical_name_systematic         ?
_chemical_name_common             ?
_chemical_melting_point           ?
_chemical_formula_moiety          'As4 H10 Mn O16' 
_chemical_formula_sum
 'As4 H10 Mn O16' 
_chemical_formula_weight          620.70

loop_
 _atom_type_symbol
 _atom_type_description
 _atom_type_scat_dispersion_real
 _atom_type_scat_dispersion_imag
 _atom_type_scat_source
 'O'  'O'   0.0106   0.0060
 'International Tables Vol C Tables 4.2.6.8 and 6.1.1.4'
 'H'  'H'   0.0000   0.0000
 'International Tables Vol C Tables 4.2.6.8 and 6.1.1.4'
 'Mn'  'Mn'   0.3368   0.7283
 'International Tables Vol C Tables 4.2.6.8 and 6.1.1.4'
 'As'  'As'   0.0499   2.0058
 'International Tables Vol C Tables 4.2.6.8 and 6.1.1.4'
 
_space_group_crystal_system       triclinic
_space_group_IT_number            2
_space_group_name_H-M_alt         'P -1'
_space_group_name_Hall            '-P 1'
 
_shelx_space_group_comment
;
The symmetry employed for this shelxl refinement is uniquely defined
by the following loop, which should always be used as a source of
symmetry information in preference to the above space-group names.
They are only intended as comments.
;
 
loop_
 _space_group_symop_operation_xyz
 'x, y, z'
 '-x, -y, -z'
 
_cell_length_a                    5.5602(2)
_cell_length_b                    7.4100(3)
_cell_length_c                    8.4276(4)
_cell_angle_alpha                 100.110(2)
_cell_angle_beta                  98.578(2)
_cell_angle_gamma                 92.744(2)
_cell_volume                      337.03(2)
_cell_formula_units_Z             1
_cell_measurement_temperature     296(2)
_cell_measurement_reflns_used     7123
_cell_measurement_theta_min       2.800
_cell_measurement_theta_max       41.516
 
_exptl_crystal_description        plate
_exptl_crystal_colour             'light pink'
_exptl_crystal_density_meas       ?
_exptl_crystal_density_method     ?
_exptl_crystal_density_diffrn     3.058          
_exptl_crystal_F_000              295
_exptl_transmission_factor_min    ?
_exptl_transmission_factor_max    ?
_exptl_crystal_size_max           0.12
_exptl_crystal_size_mid           0.09
_exptl_crystal_size_min           0.02
_exptl_absorpt_coefficient_mu     10.808
_shelx_estimated_absorpt_T_min    ?
_shelx_estimated_absorpt_T_max    ?
_exptl_absorpt_correction_type    'multi-scan'
_exptl_absorpt_correction_T_min   0.4790  
_exptl_absorpt_correction_T_max   0.7484
_exptl_absorpt_process_details    'SADABS'
_exptl_absorpt_special_details    ?
_diffrn_ambient_temperature       296(2)
_diffrn_radiation_wavelength      0.71073
_diffrn_radiation_type            MoK\a
_diffrn_source                    ?
_diffrn_measurement_device_type   'Bruker APEX-II CCD'
_diffrn_measurement_method        '\-w and \f-scans'
_diffrn_detector_area_resol_mean  ?
_diffrn_reflns_number             17841
_diffrn_reflns_av_unetI/netI      0.0356
_diffrn_reflns_av_R_equivalents   0.0285
_diffrn_reflns_limit_h_min        -10
_diffrn_reflns_limit_h_max        10
_diffrn_reflns_limit_k_min        -13
_diffrn_reflns_limit_k_max        14
_diffrn_reflns_limit_l_min        -15
_diffrn_reflns_limit_l_max        15
_diffrn_reflns_theta_min          3.717
_diffrn_reflns_theta_max          42.615
_diffrn_reflns_theta_full         25.242
_diffrn_measured_fraction_theta_max   0.991
_diffrn_measured_fraction_theta_full  0.994
_diffrn_reflns_Laue_measured_fraction_max    0.991
_diffrn_reflns_Laue_measured_fraction_full   0.994
_diffrn_reflns_point_group_measured_fraction_max   0.991
_diffrn_reflns_point_group_measured_fraction_full  0.994
_reflns_number_total              4843
_reflns_number_gt                 3767
_reflns_threshold_expression      'I > 2\s(I)'
_reflns_Friedel_coverage          0.000
_reflns_Friedel_fraction_max      .
_reflns_Friedel_fraction_full     .
 
_reflns_special_details
;
 Reflections were merged by SHELXL according to the crystal
 class for the calculation of statistics and refinement.
 
 _reflns_Friedel_fraction is defined as the number of unique
 Friedel pairs measured divided by the number that would be
 possible theoretically, ignoring centric projections and
 systematic absences.
;
 
_computing_data_collection        'APEX-2 (Bruker, 2012)'
_computing_cell_refinement        'SAINT (Bruker, 2012)'
_computing_data_reduction         'SAINT (Bruker, 2012)'
_computing_structure_solution     'isomorphic replacement'
_computing_structure_refinement 'SHELXL-2018/3 (Sheldrick, 2018)'
_computing_molecular_graphics     ?
_computing_publication_material   ?
_refine_special_details           ?
_refine_ls_structure_factor_coef  Fsqd
_refine_ls_matrix_type            full
_refine_ls_weighting_scheme       calc
_refine_ls_weighting_details
'w=1/[\s^2^(Fo^2^)+(0.0233P)^2^] where P=(Fo^2^+2Fc^2^)/3'
_atom_sites_solution_primary      ?
_atom_sites_solution_secondary    ?
_atom_sites_solution_hydrogens    difmap
_refine_ls_hydrogen_treatment     refall
_refine_ls_extinction_method      none
_refine_ls_extinction_coef        .
_refine_ls_number_reflns          4843
_refine_ls_number_parameters      113
_refine_ls_number_restraints      5
_refine_ls_R_factor_all           0.0429
_refine_ls_R_factor_gt            0.0264
_refine_ls_wR_factor_ref          0.0538
_refine_ls_wR_factor_gt           0.0503
_refine_ls_goodness_of_fit_ref    1.010
_refine_ls_restrained_S_all       1.010
_refine_ls_shift/su_max           0.002
_refine_ls_shift/su_mean          0.000
 
loop_
 _atom_site_label
 _atom_site_type_symbol
 _atom_site_fract_x
 _atom_site_fract_y
 _atom_site_fract_z
 _atom_site_U_iso_or_equiv
 _atom_site_adp_type
 _atom_site_occupancy
 _atom_site_site_symmetry_order  
 _atom_site_calc_flag
 _atom_site_refinement_flags_posn
 _atom_site_refinement_flags_adp
 _atom_site_refinement_flags_occupancy
 _atom_site_disorder_assembly
 _atom_site_disorder_group
As1 As 0.04373(2) 0.32345(2) 0.74590(2) 0.01486(3) Uani 1 1 d . . . . .
As2 As 0.42811(2) 0.82626(2) 0.77548(2) 0.01223(3) Uani 1 1 d . . . . .
Mn1 Mn 0.000000 0.000000 0.000000 0.01319(5) Uani 1 2 d S . P . .
O1 O 0.89233(17) 0.50969(14) 0.71832(16) 0.0246(2) Uani 1 1 d D . . . .
O2 O 0.1035(2) 0.23251(18) 0.55696(15) 0.0330(3) Uani 1 1 d D . . . .
O3 O 0.88324(18) 0.17359(15) 0.81840(14) 0.0233(2) Uani 1 1 d . . . . .
O4 O 0.31007(19) 0.40356(17) 0.87075(16) 0.0281(2) Uani 1 1 d D . . . .
O5 O 0.65461(15) 0.83528(13) 0.92915(12) 0.01604(17) Uani 1 1 d . . . . .
O6 O 0.44179(19) 0.64361(17) 0.62309(14) 0.0266(2) Uani 1 1 d D . . . .
O7 O 0.14820(15) 0.81198(13) 0.81933(13) 0.01688(18) Uani 1 1 d . . . . .
O8 O 0.45398(19) 1.01656(16) 0.68770(15) 0.0255(2) Uani 1 1 d D . . . .
H1 H 0.205(5) 0.153(4) 0.591(4) 0.097(5) Uiso 1 1 d D U . . .
H2 H 0.984(6) 0.612(3) 0.769(4) 0.097(5) Uiso 1 1 d D U . . .
H3 H 0.332(6) 0.333(4) 0.947(3) 0.097(5) Uiso 1 1 d D U . . .
H4 H 0.570(4) 0.582(4) 0.649(4) 0.097(5) Uiso 1 1 d D U . . .
H5 H 0.590(4) 1.086(4) 0.734(4) 0.097(5) Uiso 1 1 d D U . . .
 
loop_
 _atom_site_aniso_label
 _atom_site_aniso_U_11
 _atom_site_aniso_U_22
 _atom_site_aniso_U_33
 _atom_site_aniso_U_23
 _atom_site_aniso_U_13
 _atom_site_aniso_U_12
As1 0.01467(5) 0.01287(6) 0.01676(7) 0.00509(5) -0.00052(4) -0.00104(4)
As2 0.01048(4) 0.01337(6) 0.01239(6) 0.00184(4) 0.00117(4) 0.00047(4)
Mn1 0.01178(9) 0.01274(12) 0.01488(13) 0.00209(10) 0.00249(8) -0.00011(8)
O1 0.0172(4) 0.0132(4) 0.0414(7) 0.0065(5) -0.0034(4) 0.0007(3)
O2 0.0430(7) 0.0355(7) 0.0227(6) 0.0052(5) 0.0089(5) 0.0135(5)
O3 0.0198(4) 0.0217(5) 0.0290(6) 0.0134(5) -0.0017(4) -0.0063(3)
O4 0.0222(4) 0.0277(6) 0.0326(7) 0.0156(5) -0.0098(4) -0.0079(4)
O5 0.0134(3) 0.0171(4) 0.0166(5) 0.0048(4) -0.0019(3) -0.0019(3)
O6 0.0234(4) 0.0300(6) 0.0212(6) -0.0092(4) 0.0010(4) 0.0089(4)
O7 0.0120(3) 0.0159(4) 0.0215(5) -0.0012(4) 0.0046(3) -0.0009(3)
O8 0.0213(4) 0.0261(6) 0.0302(6) 0.0161(5) -0.0037(4) -0.0044(4)
 
_geom_special_details
;
 All esds (except the esd in the dihedral angle between two l.s. planes)
 are estimated using the full covariance matrix.  The cell esds are taken
 into account individually in the estimation of esds in distances, angles
 and torsion angles; correlations between esds in cell parameters are only
 used when they are defined by crystal symmetry.  An approximate (isotropic)
 treatment of cell esds is used for estimating esds involving l.s. planes.
;
 
loop_
 _geom_bond_atom_site_label_1
 _geom_bond_atom_site_label_2
 _geom_bond_distance
 _geom_bond_site_symmetry_2
 _geom_bond_publ_flag
As1 O3 1.6458(10) 1_455 ?
As1 O1 1.6831(10) 1_455 ?
As1 O4 1.6983(11) . ?
As1 O2 1.7037(12) . ?
As1 H1 2.00(3) . ?
As2 O7 1.6552(9) . ?
As2 O5 1.6561(9) . ?
As2 O6 1.7076(11) . ?
As2 O8 1.7131(11) . ?
Mn1 O7 2.1629(9) 2_566 ?
Mn1 O7 2.1629(9) 1_544 ?
Mn1 O5 2.1707(9) 2_666 ?
Mn1 O5 2.1707(9) 1_444 ?
Mn1 O3 2.2120(11) 1_454 ?
Mn1 O3 2.2120(11) 2_656 ?
O1 H2 0.898(10) . ?
O2 H1 0.890(10) . ?
O4 H3 0.895(10) . ?
O6 H4 0.884(10) . ?
O8 H5 0.893(10) . ?
 
loop_
 _geom_angle_atom_site_label_1
 _geom_angle_atom_site_label_2
 _geom_angle_atom_site_label_3
 _geom_angle
 _geom_angle_site_symmetry_1
 _geom_angle_site_symmetry_3
 _geom_angle_publ_flag
O3 As1 O1 112.43(5) 1_455 1_455 ?
O3 As1 O4 112.89(6) 1_455 . ?
O1 As1 O4 106.11(6) 1_455 . ?
O3 As1 O2 111.17(6) 1_455 . ?
O1 As1 O2 104.52(6) 1_455 . ?
O4 As1 O2 109.27(7) . . ?
O3 As1 H1 100.2(9) 1_455 . ?
O1 As1 H1 130.3(6) 1_455 . ?
O4 As1 H1 93.6(9) . . ?
O2 As1 H1 26.3(6) . . ?
O7 As2 O5 116.57(5) . . ?
O7 As2 O6 106.20(5) . . ?
O5 As2 O6 111.30(5) . . ?
O7 As2 O8 106.93(5) . . ?
O5 As2 O8 109.97(5) . . ?
O6 As2 O8 105.16(6) . . ?
O7 Mn1 O7 180.00(4) 2_566 1_544 ?
O7 Mn1 O5 88.63(3) 2_566 2_666 ?
O7 Mn1 O5 91.37(3) 1_544 2_666 ?
O7 Mn1 O5 91.37(3) 2_566 1_444 ?
O7 Mn1 O5 88.63(3) 1_544 1_444 ?
O5 Mn1 O5 180.00(3) 2_666 1_444 ?
O7 Mn1 O3 89.04(4) 2_566 1_454 ?
O7 Mn1 O3 90.96(4) 1_544 1_454 ?
O5 Mn1 O3 89.78(4) 2_666 1_454 ?
O5 Mn1 O3 90.22(4) 1_444 1_454 ?
O7 Mn1 O3 90.96(4) 2_566 2_656 ?
O7 Mn1 O3 89.04(4) 1_544 2_656 ?
O5 Mn1 O3 90.22(4) 2_666 2_656 ?
O5 Mn1 O3 89.78(4) 1_444 2_656 ?
O3 Mn1 O3 180.00(4) 1_454 2_656 ?
As1 O1 H2 110(3) 1_655 . ?
As1 O2 H1 96(2) . . ?
As1 O3 Mn1 130.09(5) 1_655 1_656 ?
As1 O4 H3 107(2) . . ?
As2 O5 Mn1 132.44(6) . 1_666 ?
As2 O6 H4 110(2) . . ?
As2 O7 Mn1 126.59(5) . 1_566 ?
As2 O8 H5 111(2) . . ?
 
loop_
 _geom_hbond_atom_site_label_D 
 _geom_hbond_atom_site_label_H 
 _geom_hbond_atom_site_label_A 
 _geom_hbond_distance_DH 
 _geom_hbond_distance_HA 
 _geom_hbond_distance_DA 
 _geom_hbond_angle_DHA 
 _geom_hbond_site_symmetry_A 
 _geom_hbond_publ_flag
O2 H1 O8  0.890(10) 1.921(11) 2.8018(16) 170(3) 1_545 yes
O1 H2 O7  0.898(10) 1.654(13) 2.5358(14) 167(4) 1_655 yes
O4 H3 O5  0.895(10) 1.759(12) 2.6452(15) 170(3) 2_667 yes
O6 H4 O1  0.884(10) 1.932(12) 2.7968(14) 166(3) . yes
O8 H5 O3  0.893(10) 1.723(13) 2.6007(14) 167(4) 1_565 yes
 
_refine_diff_density_max    0.605
_refine_diff_density_min   -0.915
_refine_diff_density_rms    0.172

_shelx_res_file
;
TITL mw_asteoh_4_01 in P-1
    isotypic.res
    created by SHELXL-2018/3 at 15:58:23 on 13-Jul-2019
CELL 0.71073   5.5602   7.4100   8.4276 100.110  98.578  92.744
ZERR    1.00   0.0002   0.0003   0.0004   0.002   0.002   0.002
LATT  1
SFAC O H MN AS
UNIT 16 10 1 4
TEMP 23.000

L.S. 14
BOND
FMAP 2
PLAN 20
omit     0   0   1!          0.03       1275.35      34.20       0.275       8.1
omit     0   2   2!        154.03        284.69      11.73       0.130       2.5
omit     0  -2   3!         74.82        128.43       8.25       0.087       2.4
omit     1  -2   1!         40.86         21.88       7.18       0.036       3.0
htab
rem koordinaten wie isotype Cu-struktur und Ni-Struktur
rem temp 293 K ist ok
bond $H
dfix 0.90 0.01 O1 H2
dfix 0.90 0.01 O6 H4
dfix 0.90 0.01 O2 H1
dfix 0.90 0.01 O4 H3
dfix 0.90 0.01 O8 H5
EQIV $12 x, y-1, z
HTAB O2 O8_$12
EQIV $1 x+1, y, z
HTAB O1 O7_$1
EQIV $13 -x+1, -y+1, -z+2
HTAB O4 O5_$13
HTAB O6 O1
EQIV $14 x, y+1, z
HTAB O8 O3_$14
acta
WGHT    0.023300
FVAR       0.26276   0.09679
AS1   4    0.043727    0.323445    0.745901    11.00000    0.01467    0.01287 =
         0.01676    0.00509   -0.00052   -0.00104
AS2   4    0.428110    0.826259    0.775479    11.00000    0.01048    0.01337 =
         0.01239    0.00184    0.00117    0.00047
MN1   3    0.000000    0.000000    0.000000    10.50000    0.01178    0.01274 =
         0.01488    0.00209    0.00249   -0.00011
O1    1    0.892333    0.509690    0.718322    11.00000    0.01720    0.01322 =
         0.04138    0.00645   -0.00340    0.00068
O2    1    0.103478    0.232513    0.556955    11.00000    0.04301    0.03551 =
         0.02271    0.00519    0.00887    0.01348
O3    1    0.883239    0.173588    0.818398    11.00000    0.01977    0.02174 =
         0.02900    0.01339   -0.00169   -0.00625
O4    1    0.310072    0.403562    0.870745    11.00000    0.02224    0.02770 =
         0.03256    0.01563   -0.00984   -0.00788
O5    1    0.654607    0.835280    0.929148    11.00000    0.01340    0.01710 =
         0.01660    0.00477   -0.00186   -0.00189
O6    1    0.441792    0.643609    0.623086    11.00000    0.02344    0.02998 =
         0.02124   -0.00924    0.00099    0.00887
O7    1    0.148198    0.811978    0.819328    11.00000    0.01204    0.01586 =
         0.02146   -0.00117    0.00462   -0.00089
O8    1    0.453985    1.016556    0.687704    11.00000    0.02130    0.02609 =
         0.03018    0.01613   -0.00369   -0.00441
H1    2    0.205287    0.152921    0.590594    11.00000   21.00000
H2    2    0.983956    0.612462    0.769185    11.00000   21.00000
H3    2    0.332418    0.332946    0.946870    11.00000   21.00000
H4    2    0.570000    0.582385    0.649368    11.00000   21.00000
H5    2    0.590482    1.085932    0.734050    11.00000   21.00000
HKLF 4


REM  mw_asteoh_4_01 in P-1
REM wR2 = 0.0538, GooF = S = 1.010, Restrained GooF = 1.010 for all data
REM R1 = 0.0264 for 3767 Fo > 4sig(Fo) and 0.0429 for all 4843 data
REM 113 parameters refined using 5 restraints

END

WGHT      0.0233      0.0000

REM Instructions for potential hydrogen bonds
HTAB As1 O8_$12
HTAB O2 O8_$12
HTAB O1 O7_$1
HTAB O4 O5_$13
HTAB O6 O1
HTAB O8 O3_$14

REM Highest difference peak  0.605,  deepest hole -0.915,  1-sigma level  0.172
Q1    1   1.1117  0.6034  0.9418  11.00000  0.05    0.60
Q2    1  -0.1588  0.0832  0.5787  11.00000  0.05    0.57
Q3    1   0.2225  0.4568  0.9996  11.00000  0.05    0.55
Q4    1   0.7172  0.8240  0.8378  11.00000  0.05    0.55
Q5    1   0.3657  0.6560  0.4257  11.00000  0.05    0.54
Q6    1   0.5814  0.8610  0.8477  11.00000  0.05    0.54
Q7    1   0.4250  0.4822  0.8584  11.00000  0.05    0.51
Q8    1   0.7269  0.2287  0.8977  11.00000  0.05    0.51
Q9    1   0.5035  0.8835  0.9846  11.00000  0.05    0.51
Q10   1   0.9975  0.7002  0.9229  11.00000  0.05    0.50
Q11   1   0.8671  0.7210  0.6564  11.00000  0.05    0.50
Q12   1   0.5323  0.7928  0.9634  11.00000  0.05    0.49
Q13   1  -0.1252  0.1362  0.5065  11.00000  0.05    0.48
Q14   1   0.3953  0.6772  0.4949  11.00000  0.05    0.47
Q15   1   0.5808  0.8828  1.0235  11.00000  0.05    0.47
Q16   1   0.8581 -0.0003  0.8351  11.00000  0.05    0.47
Q17   1  -0.0307  0.1188  0.4252  11.00000  0.05    0.46
Q18   1   0.2206  0.3737  1.0448  11.00000  0.05    0.46
Q19   1   0.8566  0.3347  0.9662  11.00000  0.05    0.46
Q20   1   0.0651  0.3456  1.0159  11.00000  0.05    0.46
;
_shelx_res_checksum   45171

_shelx_hkl_file
;
  -1   0   0   44.04    1.24
  -1   0   0   48.43    1.71
   1   0   0   48.56    1.24
   1   0   0   48.26    1.50
  -2   0   0  730.35   18.66
  -2   0   0  698.96   24.34
  -2   0   0  718.38   22.30
  -2   0   0  721.10   18.63
   2   0   0  714.71   18.59
   2   0   0  741.89   22.65
   2   0   0  703.75   22.60
   2   0   0  736.52   18.54
  -3   0   0   37.06    1.79
  -3   0   0   41.38    1.66
  -3   0   0   40.29    1.68
  -3   0   0   41.11    1.14
  -3   0   0   40.32    1.15
  -3   0   0   40.37    1.24
   3   0   0   40.66    1.15
   3   0   0   40.91    1.15
   3   0   0   42.18    1.41
  -4   0   0   -0.06    0.22
  -4   0   0    0.10    0.44
  -4   0   0   -0.14    0.44
  -4   0   0    0.13    0.47
  -4   0   0    0.51    0.23
  -4   0   0    0.24    0.24
  -4   0   0    0.57    0.48
   4   0   0    0.20    0.18
   4   0   0    0.09    0.25
   4   0   0    0.45    0.20
  -5   0   0   33.01    1.19
  -5   0   0   34.83    1.21
  -5   0   0   32.28    1.73
  -5   0   0   32.24    1.59
  -5   0   0   37.07    1.87
  -5   0   0   35.41    1.23
   5   0   0   34.40    1.03
   5   0   0   35.27    1.06
  -6   0   0   15.41    0.61
  -6   0   0   15.05    0.79
  -6   0   0   13.95    0.66
  -6   0   0   16.48    1.37
  -6   0   0   17.64    1.41
  -6   0   0   16.36    1.20
  -7   0   0   38.33    1.46
  -7   0   0   42.14    2.08
  -7   0   0   40.57    1.28
  -7   0   0   40.09    1.41
  -7   0   0   40.97    1.33
  -7   0   0   38.23    2.25
   7   0   0   38.05    1.22
  -8   0   0   20.51    0.96
  -8   0   0   19.97    0.92
  -8   0   0   17.41    0.95
  -8   0   0   21.93    1.69
  -8   0   0   17.50    0.99
  -8   0   0   16.88    1.84
   8   0   0   17.41    0.88
   8   0   0   16.92    0.80
  -9   0   0    5.87    0.63
  -9   0   0    6.09    0.66
  -9   0   0    5.48    0.66
   9   0   0    4.88    0.61
 -10   0   0    2.79    0.55
  10   0   0    3.74    0.62
  10  -1   0    0.35    0.45
 -10   1   0    0.55    0.41
   9  -1   0   34.72    1.27
  -9   1   0   38.23    1.33
  -9   1   0   36.61    1.34
  -9   1   0   40.22    2.39
  -9   1   0   35.52    1.35
  -8   1   0    0.81    0.38
  -8   1   0    1.23    0.92
  -8   1   0    0.16    0.35
  -8   1   0    0.36    0.33
  -7   1   0   77.65    3.13
  -7   1   0   72.56    3.29
  -7   1   0   72.99    1.99
  -7   1   0   70.06    2.04
  -7   1   0   78.64    3.35
  -7   1   0   77.98    2.21
  -7   1   0   72.73    2.25
  -6   1   0   86.29    3.23
  -6   1   0   83.66    2.44
  -6   1   0   81.03    2.46
  -6   1   0   81.58    3.34
  -6   1   0   82.35    3.40
  -5   1   0   31.73    1.08
  -5   1   0   34.47    1.64
  -5   1   0   33.63    1.70
  -5   1   0   34.14    1.87
  -5   1   0   32.42    1.70
  -5   1   0   33.74    1.07
   4  -1   0  392.36   12.22
  -4   1   0  380.77   12.21
  -4   1   0  387.84   10.77
  -4   1   0  391.49   12.10
  -4   1   0  399.70   10.77
  -4   1   0  402.19   12.44
  -4   1   0  371.97   13.54
  -3   1   0   45.80    1.81
  -3   1   0   43.59    1.90
  -3   1   0   43.89    1.77
  -2   1   0  256.80    8.89
  -2   1   0  259.16    8.16
   1  -1   0   97.36    2.56
   1  -1   0  102.86    2.56
  -1   1   0   98.80    2.56
  -1   1   0   96.87    2.56
  -1   1   0   99.20    3.47
  -1  -1   0   67.70    1.77
  -1  -1   0   66.14    1.84
  -1  -1   0   68.95    1.77
  -1  -1   0   68.79    2.23
  -1  -1   0   67.21    2.23
   1   1   0   67.28    1.84
   1   1   0   70.14    2.24
   1   1   0   67.08    1.84
  -2  -1   0   31.58    1.02
  -2  -1   0   30.35    1.25
  -2  -1   0   29.95    0.94
  -2  -1   0   32.14    1.11
  -2  -1   0   31.53    0.88
  -2  -1   0   31.67    1.11
  -2  -1   0   30.51    0.87
   2   1   0   30.61    1.14
   2   1   0   30.99    0.95
   2   1   0   30.18    0.94
   2   1   0   31.25    0.83
   2   1   0   31.44    0.85
  -3  -1   0    3.49    0.30
  -3  -1   0    3.72    0.27
  -3  -1   0    4.23    0.35
  -3  -1   0    4.22    0.30
  -3  -1   0    4.56    0.54
  -3  -1   0    4.12    0.29
  -3  -1   0    4.69    0.57
  -3  -1   0    3.80    0.35
  -3  -1   0    4.68    0.28
  -3  -1   0    3.79    0.24
   3   1   0    3.48    0.23
   3   1   0    4.26    0.31
   3   1   0    3.48    0.20
   3   1   0    3.93    0.30
   3   1   0    3.42    0.37
  -4  -1   0  372.02    9.42
  -4  -1   0  352.10   11.56
  -4  -1   0  354.89   11.37
  -4  -1   0  349.26   10.13
  -4  -1   0  352.51    9.13
  -4  -1   0  384.09   10.08
  -4  -1   0  362.00    9.43
  -4  -1   0  356.16    9.11
   4   1   0  367.68    9.42
   4   1   0  364.53    9.43
   4   1   0  378.15   11.52
   4   1   0  353.37    8.92
   4   1   0  350.40    8.93
  -5  -1   0   18.23    0.89
  -5  -1   0   16.25    1.26
  -5  -1   0   20.02    1.13
  -5  -1   0   17.86    0.70
  -5  -1   0   16.69    0.86
  -5  -1   0   16.98    0.73
   5   1   0   18.98    0.75
   5   1   0   17.64    0.64
   5   1   0   17.78    0.68
  -6  -1   0   70.11    2.26
  -6  -1   0   67.19    2.36
  -6  -1   0   77.14    2.84
  -6  -1   0   76.73    2.39
  -6  -1   0   73.27    3.08
  -6  -1   0   74.43    2.09
  -6  -1   0   74.22    2.12
   6   1   0   70.79    2.03
   6   1   0   70.17    2.00
  -7  -1   0    0.30    0.42
  -7  -1   0    0.08    0.41
  -7  -1   0    0.27    0.41
  -7  -1   0   -0.16    0.36
  -7  -1   0    0.39    0.75
  -7  -1   0   -0.08    0.80
   7   1   0    0.21    0.34
   7   1   0   -0.15    0.35
  -8  -1   0    0.56    0.45
  -8  -1   0    0.88    1.08
  -8  -1   0    1.36    0.54
  -8  -1   0    1.25    0.52
  -8  -1   0    1.04    0.51
   8   1   0    0.66    0.46
  -9  -1   0    0.13    1.15
  -9  -1   0   -0.25    0.51
  -9  -1   0    0.22    0.57
   9   1   0    0.26    0.49
 -10  -1   0    4.99    0.70
  10   1   0    5.81    0.75
  10  -2   0    0.81    0.42
  -9   2   0    7.11    1.36
  -9   2   0    4.62    0.45
  -9   2   0    4.13    0.42
  -9   2   0    4.99    0.49
  -8   2   0   -0.10    0.93
  -8   2   0   -0.69    0.87
  -8   2   0    0.24    0.29
  -7   2   0   10.52    1.26
  -7   2   0   12.26    1.38
  -6   2   0   14.35    1.25
  -6   2   0   11.90    1.34
  -6   2   0   12.80    1.23
  -5   2   0  111.03    3.99
  -5   2   0  106.29    3.83
  -5   2   0  103.62    4.28
  -4   2   0   16.34    1.10
  -4   2   0   16.46    1.19
  -4   2   0   15.35    1.23
  -3   2   0  164.59    5.30
  -3   2   0  161.88    5.12
  -3   2   0  149.15    5.71
   2  -2   0   56.24    1.77
   2  -2   0   55.64    1.47
  -2   2   0   53.10    2.14
  -2   2   0   53.89    1.46
  -2   2   0   53.73    1.45
  -2   2   0   54.29    1.58
   1  -2   0  125.67    3.24
   1  -2   0  122.79    3.24
   1  -2   0  123.35    3.94
  -1   2   0  119.64    3.11
  -1   2   0  121.02    3.92
  -1   2   0  122.52    4.33
  -1   2   0  123.26    3.11
  -1   2   0  125.41    3.24
   0  -2   0  190.84    6.14
   0  -2   0  196.50    5.05
   0  -2   0  187.78    5.04
   0   2   0  199.78    6.14
   0   2   0  188.71    5.04
   0   2   0  197.75    5.04
   0   2   0  184.95    4.87
  -1  -2   0  113.98    3.01
  -1  -2   0  110.44    3.66
  -1  -2   0  109.70    3.01
   1   2   0  108.85    3.01
   1   2   0  111.58    3.00
   1   2   0  112.22    3.66
  -2  -2   0    3.15    0.37
  -2  -2   0    3.23    0.36
  -2  -2   0    3.39    0.32
  -2  -2   0    3.12    0.29
  -2  -2   0    3.39    0.35
  -2  -2   0    2.99    0.27
  -2  -2   0    3.77    0.36
  -2  -2   0    2.83    0.29
   2   2   0    3.09    0.31
   2   2   0    3.37    0.40
   2   2   0    2.91    0.30
   2   2   0    3.59    0.27
  -3  -2   0  222.30    6.34
  -3  -2   0  224.66    6.30
  -3  -2   0  214.07    5.90
  -3  -2   0  214.05    5.90
  -3  -2   0  226.57    7.13
  -3  -2   0  222.04    5.71
  -3  -2   0  221.26    7.11
  -3  -2   0  223.35    5.70
   3   2   0  224.39    5.59
   3   2   0  215.30    5.89
   3   2   0  221.49    5.59
   3   2   0  226.73    7.20
   3   2   0  226.44    5.91
  -4  -2   0   19.75    0.82
  -4  -2   0   18.88    0.89
  -4  -2   0   16.49    1.29
  -4  -2   0   18.35    0.80
  -4  -2   0   18.89    0.86
  -4  -2   0   20.11    0.84
  -4  -2   0   19.19    0.81
  -4  -2   0   19.74    0.93
  -4  -2   0   18.68    0.94
   4   2   0   19.44    0.76
   4   2   0   19.66    0.81
   4   2   0   20.06    0.77
   4   2   0   19.86    1.02
   4   2   0   19.31    0.81
  -5  -2   0   61.58    2.05
  -5  -2   0   61.09    2.27
  -5  -2   0   60.06    1.92
  -5  -2   0   56.93    2.55
  -5  -2   0   54.93    2.00
  -5  -2   0   59.71    1.80
  -5  -2   0   57.14    1.76
   5   2   0   59.10    1.73
   5   2   0   58.91    1.72
  -6  -2   0   34.67    1.43
  -6  -2   0   37.31    1.35
  -6  -2   0   35.09    1.48
  -6  -2   0   33.14    1.98
  -6  -2   0   38.52    1.55
  -6  -2   0   35.75    1.32
   6   2   0   38.38    1.28
   6   2   0   36.94    1.29
  -7  -2   0    3.30    1.09
  -7  -2   0    5.75    0.64
  -7  -2   0    5.72    0.62
  -7  -2   0    5.21    0.67
  -7  -2   0    6.26    0.70
  -7  -2   0    7.56    0.78
   7   2   0    5.91    0.59
  -8  -2   0   66.00    2.47
  -8  -2   0   67.18    3.34
  -8  -2   0   71.47    2.51
   8   2   0   70.16    2.24
  -9  -2   0    0.21    0.65
  -9  -2   0    0.51    0.61
  -9  -2   0    1.56    1.17
   9   2   0    0.29    0.56
 -10  -2   0   28.43    1.45
 -10  -2   0   24.44    1.39
 -10   3   0   -1.44    1.00
  -9   3   0   12.26    1.60
  -8   3   0    4.28    1.21
  -8   3   0    3.83    1.10
  -7   3   0   21.61    1.81
  -7   3   0   23.35    1.86
  -7   3   0   19.97    1.63
  -6   3   0   22.75    1.66
  -6   3   0   20.71    1.49
  -6   3   0   19.66    1.60
  -5   3   0    0.65    0.65
  -5   3   0    0.35    0.63
  -5   3   0    0.36    0.58
   4  -3   0  137.99    4.27
  -4   3   0  132.84    3.76
  -4   3   0  133.53    4.75
  -4   3   0  136.05    3.77
  -4   3   0  132.37    4.55
  -4   3   0  128.91    5.09
   3  -3   0  129.93    3.47
   3  -3   0  132.18    4.25
  -3   3   0  128.43    4.89
  -3   3   0  133.56    3.45
  -3   3   0  134.08    4.40
  -3   3   0  131.28    3.75
  -3   3   0  135.07    3.46
  -3   3   0  133.73    3.75
   2  -3   0   36.63    1.14
   2  -3   0   37.95    1.39
   2  -3   0   38.33    1.15
  -2   3   0   40.25    1.71
  -2   3   0   40.42    1.15
  -2   3   0   40.81    1.14
  -2   3   0   39.18    1.24
  -2   3   0   38.67    1.04
  -2   3   0   38.19    1.04
   1  -3   0  419.01   10.85
   1  -3   0  419.33   13.22
   1  -3   0  407.13   10.85
  -1   3   0  412.05   10.84
  -1   3   0  412.18   10.51
  -1   3   0  428.21   14.30
  -1   3   0  429.67   10.85
  -1   3   0  407.08   13.18
  -1   3   0  431.47   11.64
   0  -3   0    1.94    0.33
   0  -3   0    1.32    0.24
   0  -3   0    1.86    0.26
   0   3   0    1.75    0.26
   0   3   0    2.08    0.27
   0   3   0    1.79    0.22
   0   3   0    1.23    0.28
  -1  -3   0  254.02    6.78
  -1  -3   0  259.28    6.77
  -1  -3   0  251.72    8.24
  -1  -3   0  260.34    7.21
   1   3   0  248.93    6.76
   1   3   0  260.03    8.23
  -2  -3   0  178.73    5.90
  -2  -3   0  175.89    4.85
  -2  -3   0  181.88    5.17
  -2  -3   0  175.29    4.66
  -2  -3   0  185.19    5.84
  -2  -3   0  180.79    4.87
  -2  -3   0  172.59    5.87
  -2  -3   0  184.14    5.21
   2   3   0  176.30    4.84
   2   3   0  174.21    4.85
   2   3   0  186.47    5.92
  -3  -3   0  195.91    5.69
  -3  -3   0  198.27    5.73
  -3  -3   0  198.51    5.15
  -3  -3   0  195.35    5.35
  -3  -3   0  199.04    6.46
  -3  -3   0  191.04    5.33
  -3  -3   0  199.99    6.43
  -3  -3   0  193.69    6.43
  -3  -3   0  197.63    5.14
   3   3   0  193.06    5.04
   3   3   0  196.40    6.50
   3   3   0  202.43    5.35
   3   3   0  191.06    5.31
  -4  -3   0  227.80    5.96
  -4  -3   0  226.92    6.18
  -4  -3   0  224.34    6.17
  -4  -3   0  231.86    6.42
  -4  -3   0  221.16    7.46
  -4  -3   0  219.73    6.61
  -4  -3   0  229.02    7.41
  -4  -3   0  229.30    6.59
  -4  -3   0  228.20    5.96
   4   3   0  226.28    5.84
   4   3   0  230.47    6.17
   4   3   0  228.53    7.53
   4   3   0  226.15    6.16
  -5  -3   0    3.51    0.83
  -5  -3   0    5.30    0.65
  -5  -3   0    4.87    0.51
  -5  -3   0    5.20    0.55
  -5  -3   0    4.99    0.58
  -5  -3   0    4.27    0.59
   5   3   0    4.19    0.48
  -6  -3   0   64.14    2.34
  -6  -3   0   59.25    2.79
  -6  -3   0   61.87    2.04
  -6  -3   0   61.62    2.29
  -6  -3   0   65.56    2.24
   6   3   0   63.42    1.99
  -7  -3   0   16.73    1.22
  -7  -3   0   15.83    1.15
  -7  -3   0   15.70    1.63
   7   3   0   15.14    0.99
  -8  -3   0    1.21    1.09
  -8  -3   0    3.00    0.80
  -8  -3   0    1.42    0.67
  -9  -3   0    5.07    1.46
  -9  -3   0    4.51    0.87
 -10  -3   0    0.44    0.79
 -10   4   0   18.82    2.09
  -9   4   0   -0.11    1.03
  -8   4   0   66.92    3.25
  -7   4   0    8.06    1.33
  -7   4   0   10.83    1.33
  -7   4   0   10.36    1.36
  -6   4   0   21.28    1.71
  -6   4   0   21.47    1.76
  -6   4   0   19.81    1.44
   5  -4   0  100.90    3.25
  -5   4   0   95.14    3.66
  -5   4   0  103.79    3.89
  -5   4   0   94.91    4.05
  -5   4   0   96.91    2.83
  -5   4   0   97.93    2.82
   4  -4   0    1.04    0.30
  -4   4   0    0.66    0.25
  -4   4   0    0.34    0.67
  -4   4   0    0.78    0.57
  -4   4   0    0.90    0.25
  -4   4   0    1.10    0.28
  -4   4   0    0.54    0.57
   3  -4   0  237.21    7.50
   3  -4   0  232.93    6.13
  -3   4   0  238.80    6.39
  -3   4   0  240.45    6.61
  -3   4   0  223.97    6.59
  -3   4   0  230.91    6.12
  -3   4   0  240.72    6.11
  -3   4   0  237.22    7.48
  -3   4   0  221.99    5.90
  -3   4   0  227.47    5.90
  -3   4   0  231.32    8.32
  -3   4   0  241.18    6.56
   2  -4   0    8.38    0.42
   2  -4   0    8.19    0.59
   2  -4   0    8.39    0.47
   2  -4   0    8.25    0.48
  -2   4   0    8.34    0.44
  -2   4   0    8.80    0.55
  -2   4   0    8.63    0.46
  -2   4   0    7.44    0.72
  -2   4   0    9.08    0.55
  -2   4   0   10.35    0.73
  -2   4   0    8.51    0.52
  -2   4   0    9.83    0.50
   1  -4   0  227.90    6.06
   1  -4   0  224.22    7.38
   1  -4   0  224.57    6.06
  -1   4   0  225.62    6.04
  -1   4   0  226.58    5.84
  -1   4   0  220.89    6.04
  -1   4   0  229.64    7.34
  -1   4   0  231.97    8.00
  -1   4   0  231.59    6.49
  -1   4   0  232.14    6.44
   0  -4   0    5.57    0.45
   0  -4   0    6.77    0.48
   0  -4   0    6.25    0.56
   0  -4   0    7.88    0.55
   0   4   0    7.38    0.48
   0   4   0    7.37    0.60
   0   4   0    8.25    0.56
   0   4   0    6.51    0.47
   0   4   0    6.54    0.50
   0   4   0    6.70    0.43
  -1  -4   0    1.07    0.36
  -1  -4   0    0.62    0.35
  -1  -4   0    0.36    0.28
  -1  -4   0    1.90    0.33
   1   4   0    0.26    0.28
   1   4   0    0.71    0.28
   1   4   0    0.97    0.28
   1   4   0    0.89    0.37
  -2  -4   0    0.57    0.31
  -2  -4   0    0.75    0.37
  -2  -4   0    0.95    0.35
  -2  -4   0   -0.18    0.52
  -2  -4   0    0.71    0.39
  -2  -4   0    0.86    0.38
  -2  -4   0    0.74    0.39
   2   4   0    0.90    0.34
   2   4   0    0.56    0.38
   2   4   0    0.94    0.32
   2   4   0    0.77    0.32
  -3  -4   0  253.71    6.91
  -3  -4   0  249.02    8.34
  -3  -4   0  256.23    8.23
  -3  -4   0  252.15    7.35
  -3  -4   0  248.01    6.89
  -3  -4   0  255.47    6.64
  -3  -4   0  258.25    7.40
   3   4   0  254.46    7.28
   3   4   0  251.12    8.39
   3   4   0  260.91    6.91
   3   4   0  254.49    6.88
  -4  -4   0   17.68    1.42
  -4  -4   0   15.69    1.05
  -4  -4   0   17.82    1.08
   4   4   0   19.70    0.90
  -5  -4   0  108.60    3.54
  -5  -4   0  107.77    3.54
  -5  -4   0  107.69    4.11
   5   4   0  108.22    3.11
  -6  -4   0    0.15    0.85
  -6  -4   0    0.38    0.56
  -6  -4   0    1.03    0.62
  -7  -4   0    7.53    0.89
  -7  -4   0    4.72    1.17
  -7  -4   0    7.51    0.98
  -8  -4   0    2.86    1.24
  -8  -4   0    2.32    0.76
  -8  -4   0    1.48    0.79
  -9  -4   0    0.96    0.79
  -9  -4   0    1.63    1.30
  -9   5   0    1.64    1.21
  -8   5   0    0.35    1.02
  -7   5   0    8.81    0.54
  -7   5   0    9.17    1.44
  -7   5   0    7.22    1.26
  -7   5   0   10.07    1.42
  -6   5   0   42.92    2.55
  -6   5   0   42.44    2.23
  -6   5   0   51.57    2.57
  -6   5   0   44.87    1.44
   5  -5   0   17.61    0.89
  -5   5   0   17.10    0.79
  -5   5   0   15.94    1.46
  -5   5   0   18.00    0.75
  -5   5   0   18.60    0.77
  -5   5   0   14.31    1.40
  -5   5   0   15.36    1.33
   4  -5   0  167.21    5.29
   4  -5   0  153.74    4.24
  -4   5   0  153.59    5.41
  -4   5   0  164.36    4.48
  -4   5   0  161.31    4.22
  -4   5   0  161.76    4.60
  -4   5   0  162.68    4.63
  -4   5   0  153.87    4.12
  -4   5   0  160.57    6.02
  -4   5   0  156.05    4.61
  -4   5   0  157.19    4.11
   3  -5   0    4.57    0.53
   3  -5   0    4.42    0.34
   3  -5   0    4.53    0.41
  -3   5   0    4.64    0.44
  -3   5   0    4.81    0.40
  -3   5   0    3.97    0.71
  -3   5   0    5.01    0.37
  -3   5   0    4.48    0.40
  -3   5   0    4.87    0.47
  -3   5   0    3.99    0.43
  -3   5   0    4.23    0.72
   2  -5   0   23.85    0.86
   2  -5   0   23.08    0.93
   2  -5   0   21.57    0.91
   2  -5   0   24.36    1.14
  -2   5   0   24.12    0.99
  -2   5   0   24.52    1.06
  -2   5   0   23.35    0.92
  -2   5   0   22.60    1.01
  -2   5   0   23.86    0.90
  -2   5   0   23.94    0.88
  -2   5   0   24.91    1.38
  -2   5   0   25.25    1.21
  -2   5   0   23.33    1.01
   1  -5   0   61.99    1.91
   1  -5   0   59.34    2.31
   1  -5   0   62.91    1.91
  -1   5   0   61.96    2.04
  -1   5   0   61.04    1.89
  -1   5   0   61.55    1.79
  -1   5   0   61.07    2.26
  -1   5   0   59.51    1.87
  -1   5   0   61.01    2.57
  -1   5   0   60.83    2.03
   0  -5   0   65.15    2.09
   0  -5   0   72.00    2.23
   0  -5   0   65.95    2.09
   0  -5   0   65.39    2.52
   0   5   0   67.83    1.99
   0   5   0   67.42    2.08
   0   5   0   70.10    2.24
   0   5   0   68.49    2.22
   0   5   0   64.55    2.06
   0   5   0   66.53    2.49
  -1  -5   0  186.89    5.17
  -1  -5   0  182.58    6.27
  -1  -5   0  174.35    5.16
  -1  -5   0  192.74    5.49
   1   5   0  187.46    6.26
   1   5   0  186.29    5.46
   1   5   0  188.76    5.17
   1   5   0  184.85    5.14
   1   5   0  193.02    5.51
  -2  -5   0   40.29    1.50
  -2  -5   0   42.23    1.64
  -2  -5   0   37.61    1.78
  -2  -5   0   39.46    1.64
  -2  -5   0   40.78    1.52
   2   5   0   42.52    1.83
   2   5   0   41.72    1.62
   2   5   0   40.99    1.50
   2   5   0   43.03    1.50
  -3  -5   0   48.44    1.87
  -3  -5   0   48.99    1.75
  -3  -5   0   43.75    1.86
  -3  -5   0   47.41    1.75
  -3  -5   0   48.63    2.27
  -3  -5   0   48.83    2.09
   3   5   0   50.48    1.85
   3   5   0   50.36    1.75
   3   5   0   50.19    2.15
  -4  -5   0   73.83    2.60
  -4  -5   0   67.48    2.54
  -4  -5   0   71.23    3.00
  -5  -5   0    6.62    0.86
  -5  -5   0    6.76    0.81
  -5  -5   0    6.85    1.09
  -6  -5   0   32.73    2.18
  -6  -5   0   40.24    1.90
  -6  -5   0   34.96    1.80
  -7  -5   0   64.86    2.69
  -7  -5   0   70.31    3.30
  -7  -5   0   65.87    2.71
  -8  -5   0   -0.98    0.72
  -8  -5   0   -0.60    0.71
  -8  -5   0   -0.35    1.06
  -9  -5   0   30.24    1.81
  -9  -5   0   32.59    2.55
  -9  -5   0   32.92    1.93
  -9   6   0    2.80    1.33
  -8   6   0   16.71    1.81
  -8   6   0   14.98    0.66
  -8   6   0   16.31    1.96
  -7   6   0   12.01    1.56
  -7   6   0   10.74    0.60
  -7   6   0    8.33    0.60
  -7   6   0    9.64    0.54
  -7   6   0   12.48    1.52
  -6   6   0   11.81    0.59
  -6   6   0    9.29    1.31
  -6   6   0   11.33    0.61
  -6   6   0   10.41    1.26
  -6   6   0   11.21    0.69
  -6   6   0   12.36    1.50
  -6   6   0   11.17    0.65
   5  -6   0    9.20    0.53
  -5   6   0   10.49    1.18
  -5   6   0    9.95    0.67
  -5   6   0   10.47    0.59
  -5   6   0    8.96    1.28
  -5   6   0   11.21    1.26
  -5   6   0    9.64    0.68
   4  -6   0    3.46    0.37
  -4   6   0    3.49    0.38
  -4   6   0    5.32    0.53
  -4   6   0    4.43    0.47
  -4   6   0    5.63    0.82
  -4   6   0    4.53    0.86
  -4   6   0    4.22    0.49
   3  -6   0    1.01    0.44
   3  -6   0    0.29    0.30
  -3   6   0    0.40    0.36
  -3   6   0    0.12    0.33
  -3   6   0    0.47    0.57
  -3   6   0    0.66    0.60
  -3   6   0   -0.11    0.38
  -3   6   0    0.17    0.30
   2  -6   0  205.94    5.31
   2  -6   0  202.95    6.84
  -2   6   0  211.71    6.65
  -2   6   0  202.77    5.60
  -2   6   0  202.30    5.95
  -2   6   0  207.91    7.45
  -2   6   0  199.86    5.98
  -2   6   0  203.60    5.38
  -2   6   0  210.37    5.82
  -2   6   0  198.49    5.57
   1  -6   0    0.29    0.41
   1  -6   0    1.10    0.39
   1  -6   0    0.99    0.49
   1  -6   0    0.53    0.38
  -1   6   0    0.20    0.38
  -1   6   0   -0.01    0.34
  -1   6   0    0.54    0.33
  -1   6   0    0.27    0.49
  -1   6   0    0.30    0.34
  -1   6   0   -0.31    0.38
  -1   6   0    0.80    0.61
   0  -6   0  543.46   14.25
   0  -6   0  550.21   15.16
   0  -6   0  547.22   17.36
   0  -6   0  534.11   14.24
   0   6   0  540.02   15.23
   0   6   0  530.31   15.12
   0   6   0  530.72   14.22
   0   6   0  544.14   14.22
  -1  -6   0   29.93    1.26
  -1  -6   0   29.80    1.55
  -1  -6   0   25.99    1.23
  -1  -6   0   30.67    1.38
   1   6   0   29.13    1.23
   1   6   0   29.99    1.40
   1   6   0   28.70    1.22
   1   6   0   30.29    1.37
  -2  -6   0  231.34    6.56
  -2  -6   0  240.51    7.01
  -2  -6   0  236.93    7.96
  -2  -6   0  229.26    6.93
  -2  -6   0  230.13    6.54
   2   6   0  236.98    6.54
   2   6   0  233.60    6.50
   2   6   0  240.32    6.91
  -3  -6   0   59.91    2.31
  -3  -6   0   65.28    2.83
  -3  -6   0   62.81    2.35
  -3  -6   0   61.81    2.20
   3   6   0   61.62    2.29
  -4  -6   0    1.02    0.63
  -4  -6   0    0.84    0.81
  -4  -6   0   -0.03    0.56
  -5  -6   0   58.90    2.79
  -5  -6   0   54.92    2.33
  -5  -6   0   51.22    2.30
  -6  -6   0    2.39    0.82
  -6  -6   0    2.85    0.85
  -6  -6   0    2.23    1.03
  -7  -6   0   19.64    1.91
  -7  -6   0   17.44    1.47
  -7  -6   0   17.23    1.48
  -8  -6   0    0.59    1.17
  -8  -6   0    1.18    0.89
  -8  -6   0   -0.06    0.84
  -9  -6   0    2.87    1.02
  -9  -6   0    2.62    0.99
  -9  -6   0    2.31    1.32
  -9   7   0   15.45    1.94
   8  -7   0    0.09    0.34
  -8   7   0   -0.02    1.09
  -8   7   0    0.27    0.37
  -8   7   0   -0.22    1.12
  -7   7   0   20.48    1.90
  -7   7   0   20.47    0.89
  -7   7   0   17.55    0.93
  -7   7   0   19.49    1.94
   6  -7   0   49.71    1.59
  -6   7   0   50.22    1.77
  -6   7   0   55.03    2.93
  -6   7   0   53.60    1.64
  -6   7   0   49.61    1.75
  -6   7   0   50.89    2.57
  -6   7   0   53.35    2.94
   5  -7   0   13.83    0.77
  -5   7   0   15.13    0.81
  -5   7   0   14.04    1.35
  -5   7   0   12.28    1.58
  -5   7   0   13.11    0.84
  -5   7   0   15.01    1.51
  -5   7   0   13.40    0.84
   4  -7   0  148.48    3.95
  -4   7   0  153.02    4.46
  -4   7   0  141.86    4.45
  -4   7   0  147.63    5.19
  -4   7   0  144.55    5.75
  -4   7   0  149.78    4.01
  -4   7   0  144.78    4.33
   3  -7   0    1.11    0.39
  -3   7   0    2.31    0.73
  -3   7   0    0.98    0.44
  -3   7   0    1.28    0.64
  -3   7   0    0.54    0.45
  -3   7   0    1.73    0.45
  -3   7   0    0.91    0.38
  -2   7   0   75.57    2.58
  -2   7   0   79.94    3.34
  -2   7   0   80.22    2.93
  -2   7   0   76.27    2.34
  -2   7   0   75.35    2.61
   1  -7   0    8.12    0.89
   1  -7   0   13.57    0.92
  -1   7   0   12.30    1.15
  -1   7   0   11.21    0.86
  -1   7   0   10.21    0.82
  -1   7   0   12.41    0.93
   0  -7   0    5.57    0.78
   0  -7   0    5.59    0.70
   0  -7   0    4.66    0.63
   0   7   0    8.38    0.72
   0   7   0    5.96    0.69
   0   7   0    5.18    0.65
  -1  -7   0    0.51    0.51
  -1  -7   0    1.22    0.60
  -1  -7   0    1.66    0.50
   1   7   0    1.29    0.48
   1   7   0    1.51    0.55
  -2  -7   0   21.94    1.41
  -2  -7   0   21.95    1.28
  -2  -7   0   22.09    1.18
   2   7   0   21.35    1.24
   2   7   0   21.27    1.14
  -3  -7   0   16.09    1.19
  -3  -7   0   12.27    1.12
  -3  -7   0   14.26    1.45
   3   7   0   13.82    1.06
  -4  -7   0   56.57    2.75
  -4  -7   0   56.95    2.34
  -4  -7   0   50.75    2.27
   4   7   0   55.07    2.24
  -5  -7   0    0.74    0.76
  -5  -7   0    0.02    0.93
  -5  -7   0   -0.32    0.69
  -6  -7   0   22.25    1.71
  -6  -7   0   21.08    1.92
  -6  -7   0   24.74    1.79
  -7  -7   0    1.39    0.91
  -7  -7   0    2.97    0.98
  -7  -7   0    1.75    1.14
  -8  -7   0    1.47    0.99
  -8  -7   0    0.74    1.23
  -8  -7   0   -0.95    0.85
   9  -8   0    4.20    0.57
   8  -8   0    2.19    0.49
  -8   8   0    2.84    1.28
   7  -8   0    0.62    0.43
  -7   8   0    2.15    1.05
  -7   8   0    0.54    0.49
  -7   8   0    0.56    0.44
  -7   8   0    1.30    1.09
   6  -8   0    5.28    0.58
  -6   8   0    6.75    1.21
  -6   8   0    6.20    1.23
  -6   8   0    6.26    0.64
  -6   8   0    5.80    0.63
  -6   8   0    5.79    0.69
   5  -8   0   32.75    1.26
  -5   8   0   31.21    1.29
  -5   8   0   28.62    2.39
  -5   8   0   33.11    1.44
  -5   8   0   29.47    1.84
  -5   8   0   27.95    1.36
  -5   8   0   28.88    1.37
  -5   8   0   29.61    2.05
  -4   8   0    2.76    0.56
  -4   8   0    0.89    0.81
  -4   8   0    2.35    0.50
  -4   8   0    1.78    0.83
  -4   8   0    2.94    0.58
  -4   8   0    3.40    0.63
  -3   8   0   37.76    1.44
  -3   8   0   37.04    2.13
  -3   8   0   36.32    1.60
  -3   8   0   36.07    1.85
  -3   8   0   35.58    1.58
  -2   8   0   27.87    1.39
  -2   8   0   27.00    1.75
  -2   8   0   26.41    1.39
  -2   8   0   26.23    1.45
  -1   8   0    1.41    0.74
  -1   8   0    1.35    0.54
  -1   8   0    1.46    0.54
   0  -8   0   56.60    2.24
   0   8   0   57.18    2.26
   0   8   0   57.03    2.23
  -1  -8   0    6.21    0.83
   1   8   0    6.10    0.80
  -2  -8   0    6.88    0.90
   2   8   0    7.17    0.86
  -3  -8   0   24.58    1.54
  -3  -8   0   25.07    2.03
   3   8   0   27.92    1.52
  -4  -8   0    0.01    0.97
  -4  -8   0   -0.03    0.67
   4   8   0    0.61    0.70
  -5  -8   0    6.16    1.30
  -5  -8   0    7.29    1.22
  -5  -8   0    6.53    1.08
  -6  -8   0   12.70    1.43
  -6  -8   0   12.31    1.64
  -6  -8   0   15.49    1.54
  -7  -8   0   -0.23    1.15
  -7  -8   0   -0.35    0.88
  -7  -8   0    1.71    1.03
  -8  -8   0   21.64    2.22
  -8  -8   0   20.48    1.84
  -8  -8   0   23.95    1.95
  -8   9   0    0.55    1.19
  -7   9   0   12.09    0.87
  -7   9   0   11.92    0.89
  -7   9   0   12.44    1.65
  -7   9   0   12.26    1.77
  -6   9   0    1.08    0.60
  -6   9   0    2.19    1.14
  -6   9   0    0.77    0.52
  -6   9   0    0.20    0.51
  -6   9   0   -0.33    0.95
  -5   9   0    2.00    0.68
  -5   9   0    3.00    1.08
  -5   9   0    1.24    0.58
  -5   9   0    1.04    0.62
  -5   9   0    1.13    0.90
  -4   9   0    1.81    0.64
  -4   9   0    0.81    0.84
  -4   9   0    1.51    0.68
  -4   9   0    1.54    0.90
  -3   9   0   26.32    1.91
  -3   9   0   26.83    1.45
  -3   9   0   26.82    1.63
  -3   9   0   27.18    1.48
  -2   9   0    2.40    0.67
  -2   9   0    1.90    0.67
  -2   9   0    4.07    0.93
  -1   9   0   99.71    3.46
  -1   9   0  100.21    3.45
   0  -9   0   -0.63    0.60
   0   9   0   -0.03    0.59
   0   9   0   -0.32    0.55
  -1  -9   0   69.31    2.75
   1   9   0   69.31    2.73
  -2  -9   0   18.30    1.46
  -2  -9   0   25.58    2.09
   2   9   0   17.97    1.42
  -3  -9   0   11.82    1.24
  -3  -9   0   12.55    1.63
   3   9   0   13.19    1.23
  -4  -9   0   65.83    2.97
  -4  -9   0   74.50    3.45
  -5  -9   0    4.72    1.32
  -5  -9   0    2.38    0.99
  -6  -9   0   30.45    2.43
  -6  -9   0   28.28    2.01
  -7  -9   0   -0.49    0.92
  -7  10   0    5.12    1.35
  -7  10   0    6.65    0.73
  -6  10   0    3.39    1.20
  -6  10   0    3.44    0.69
  -5  10   0   29.10    1.56
  -5  10   0   34.40    1.78
  -5  10   0   33.45    2.09
  -4  10   0    0.29    0.71
  -4  10   0    0.00    0.63
  -4  10   0   -0.25    0.83
  -3  10   0   65.69    2.58
  -3  10   0   65.05    2.85
  -3  10   0   62.95    2.59
  -2  10   0    0.17    0.63
  -2  10   0    1.14    0.72
  -1  10   0   32.13    1.79
  -1  10   0   33.55    1.86
   0  10   0    4.47    0.93
  -1 -10   0    0.50    0.77
   1  10   0    0.77    0.80
  -2 -10   0    3.05    1.33
  -2 -10   0    1.66    0.91
   2  10   0    1.40    0.81
  -3 -10   0   29.33    1.85
  -3 -10   0   32.44    2.47
   3  10   0   28.17    1.95
  -4 -10   0    5.32    1.15
  -5 -10   0   20.52    1.85
  -6 -10   0    0.44    1.00
  -6  11   0    4.74    1.23
  -6  11   0    3.94    0.78
  -5  11   0    8.79    1.10
  -5  11   0    8.49    1.00
  -5  11   0    9.54    1.40
  -4  11   0    9.57    1.07
  -4  11   0   12.46    1.24
  -3  11   0    0.85    0.73
  -3  11   0   -0.31    0.79
  -2  11   0    1.75    0.85
  -2  11   0    0.65    0.81
  -1  11   0   16.77    1.45
  -1  11   0   21.86    1.63
   0  11   0    0.76    0.84
  -1 -11   0   25.52    1.81
   1  11   0   24.86    1.80
  -2 -11   0    5.05    1.13
   2  11   0    3.57    1.04
  -3 -11   0    8.79    1.36
   3  11   0   10.48    1.38
  -4 -11   0    2.63    1.16
  -5 -11   0    1.78    1.13
  -5  12   0   -1.14    0.82
  -5  12   0    0.45    0.77
  -4  12   0   -0.51    0.78
  -4  12   0    0.02    0.82
  -3  12   0    1.10    0.88
  -3  12   0    1.41    0.93
  -2  12   0   11.90    1.36
  -2  12   0   13.49    1.40
  -1  12   0    0.63    0.89
   0  12   0   41.44    2.24
   1  12   0    7.71    1.27
  -2 -12   0   19.21    1.79
   2  12   0   21.02    1.78
  -3 -12   0   21.87    1.89
   3  12   0   20.49    1.84
  -4 -12   0    2.74    1.17
  -4  13   0   25.80    1.87
  -4  13   0   21.41    1.66
  -3  13   0    1.59    0.96
  -3  13   0    0.52    0.91
  -2  13   0   13.29    1.54
  -2  13   0   13.74    1.45
  -1  13   0    0.91    0.95
   0  13   0    0.50    0.89
   1  13   0    0.65    1.04
   2  13   0    1.70    1.12
   3  13  -1   -0.03    1.06
  -3 -13   1    0.18    1.14
   2  13  -1   -0.36    1.03
   1  13  -1    8.61    1.36
   0  13  -1    1.40    1.01
  -1  13  -1    9.81    1.34
  -2  13  -1    0.44    0.92
  -2  13  -1   -0.09    0.91
  -3  13  -1   -0.25    0.86
  -3  13  -1    0.76    0.94
  -4  13  -1   -0.18    0.91
  -4  13  -1   -0.51    0.82
  -4 -12   1    0.85    1.09
   3  12  -1    1.29    1.07
  -3 -12   1    1.09    1.06
   2  12  -1   17.03    1.64
  -2 -12   1   13.39    1.56
   1  12  -1    0.13    0.92
   0  12  -1   24.23    1.84
  -1  12  -1    3.87    1.03
  -2  12  -1    5.52    1.11
  -2  12  -1    3.73    1.00
  -3  12  -1   28.99    1.85
  -4  12  -1    1.80    0.94
  -4  12  -1    0.32    0.81
  -5  12  -1   23.75    1.60
  -5  12  -1   30.57    1.82
  -5 -11   1    0.41    1.02
  -4 -11   1   32.85    2.07
   3  11  -1    0.83    0.90
  -3 -11   1    0.91    0.99
   2  11  -1   21.30    1.71
  -2 -11   1   22.75    1.82
   1  11  -1   21.77    1.72
  -1 -11   1   24.98    1.84
   0  11  -1    2.53    0.89
  -1  11  -1   30.34    1.91
  -1  11  -1   29.77    1.73
  -2  11  -1    4.84    0.98
  -2  11  -1    4.79    0.97
  -3  11  -1    6.73    1.01
  -3  11  -1    6.61    1.02
  -4  11  -1   17.65    1.38
  -4  11  -1   19.18    1.47
  -5  11  -1    0.19    0.98
  -5  11  -1   -0.25    0.64
  -5  11  -1    0.39    0.80
  -6  11  -1    1.86    1.19
  -6  11  -1    2.27    0.71
  -6 -10   1   11.67    1.50
  -5 -10   1    1.71    1.03
  -4 -10   1    0.50    0.88
   3  10  -1    0.75    0.79
  -3 -10   1    0.44    0.87
   2  10  -1   24.06    1.74
  -2 -10   1   22.61    1.60
   1  10  -1    1.75    0.80
  -1 -10   1    1.58    0.77
   0  10  -1   57.59    2.43
  -1  10  -1    2.21    0.77
  -1  10  -1    2.08    0.80
  -2  10  -1   21.31    1.49
  -2  10  -1   22.23    1.51
  -2  10  -1   24.03    2.01
  -3  10  -1    0.24    0.66
  -3  10  -1    0.66    1.00
  -3  10  -1    1.19    0.75
  -4  10  -1   -0.82    0.95
  -4  10  -1    0.74    0.67
  -4  10  -1    0.85    0.67
  -4  10  -1    0.41    0.91
  -5  10  -1    1.36    0.68
  -5  10  -1    2.75    1.04
  -5  10  -1    1.76    0.73
  -5  10  -1    1.55    1.16
  -6  10  -1   12.00    1.76
  -6  10  -1   13.20    1.60
  -6  10  -1   10.93    0.95
  -7  10  -1   -0.68    1.05
  -7  10  -1   -0.81    0.49
  -7  -9   1    5.80    1.29
  -7  -9   1    5.33    1.20
  -6  -9   1    1.74    1.02
  -5  -9   1   -0.94    0.77
   4   9  -1    6.52    1.07
  -4  -9   1    6.37    1.08
   3   9  -1    9.21    1.11
  -3  -9   1   10.92    1.23
   2   9  -1   13.53    1.19
  -2  -9   1   17.06    1.61
  -2  -9   1   14.94    1.32
   1   9  -1   50.56    2.13
  -1  -9   1   48.66    2.20
   0   9  -1    0.24    0.94
   0   9  -1    0.38    0.57
   0   9  -1   -0.28    0.56
   0  -9   1    0.55    0.59
  -1   9  -1   48.60    2.09
  -1   9  -1   46.46    2.04
  -1   9  -1   56.69    2.86
  -2   9  -1   72.69    3.44
  -2   9  -1   66.87    2.65
  -2   9  -1   73.21    2.67
  -3   9  -1   16.72    1.19
  -3   9  -1   14.03    1.13
  -3   9  -1   15.49    1.33
  -3   9  -1   17.15    1.64
  -4   9  -1   85.70    3.04
  -4   9  -1   86.74    3.53
  -4   9  -1   87.54    3.04
  -4   9  -1   88.78    4.09
  -5   9  -1   -0.55    0.48
  -5   9  -1    1.19    0.64
  -5   9  -1    1.50    0.94
  -5   9  -1    0.01    0.54
  -5   9  -1    1.41    0.99
  -5   9  -1    1.27    0.60
  -6   9  -1   26.20    1.95
  -6   9  -1   23.51    2.17
  -6   9  -1   27.36    1.29
  -6   9  -1   19.09    2.25
  -6   9  -1   24.15    1.31
  -6   9  -1   21.79    1.20
  -7   9  -1    0.51    1.15
  -7   9  -1    0.07    0.45
  -7   9  -1   -0.08    0.54
  -7   9  -1    0.35    0.53
  -7   9  -1    2.64    1.21
  -8   9  -1    2.75    1.32
   8  -9   1    1.60    0.57
  -8  -8   1    3.49    1.13
  -8  -8   1    4.10    1.16
  -7  -8   1    8.00    1.25
  -7  -8   1    7.81    1.33
  -6  -8   1    2.28    0.99
  -6  -8   1    0.45    1.04
  -6  -8   1    1.50    0.90
  -5  -8   1  100.05    3.73
  -5  -8   1   93.99    3.60
  -5  -8   1   94.64    4.02
   4   8  -1    3.30    0.81
  -4  -8   1    3.11    1.00
  -4  -8   1    3.74    0.88
   3   8  -1  141.33    4.53
  -3  -8   1  145.53    5.12
  -3  -8   1  130.16    4.57
   2   8  -1   37.49    1.76
  -2  -8   1   37.63    2.03
  -2  -8   1   41.17    2.21
  -2  -8   1   39.11    1.87
   1   8  -1   30.63    1.52
  -1  -8   1   31.12    1.62
   0   8  -1   31.03    1.49
   0   8  -1   30.65    1.49
   0  -8   1   28.77    1.52
  -1   8  -1   -0.16    0.44
  -1   8  -1    0.52    0.49
  -1   8  -1    0.40    0.76
  -2   8  -1   34.83    1.61
  -2   8  -1   36.33    1.60
  -2   8  -1   33.86    1.67
  -2   8  -1   33.58    2.12
  -3   8  -1   13.10    1.18
  -3   8  -1   13.15    1.39
  -3   8  -1   13.78    1.01
  -3   8  -1   12.73    0.97
  -3   8  -1   13.75    0.86
  -4   8  -1   20.94    1.49
  -4   8  -1   20.54    1.06
  -4   8  -1   18.84    1.13
  -4   8  -1   20.96    1.73
  -4   8  -1   21.66    1.25
  -4   8  -1   16.71    1.10
  -5   8  -1    5.61    1.14
  -5   8  -1    4.00    0.56
  -5   8  -1    3.42    1.00
  -5   8  -1    4.32    0.67
  -5   8  -1    4.62    0.65
  -5   8  -1    4.58    0.69
  -5   8  -1    3.92    1.37
   5  -8   1    3.95    0.57
  -6   8  -1    1.66    0.51
  -6   8  -1    2.14    0.58
  -6   8  -1    0.88    1.06
  -6   8  -1    1.26    0.49
  -6   8  -1    0.73    0.89
  -6   8  -1    2.98    1.35
   6  -8   1    1.72    0.49
  -7   8  -1   -1.49    0.86
  -7   8  -1   -0.70    1.04
  -7   8  -1   -0.26    0.48
  -7   8  -1   -0.06    0.44
   7  -8   1    0.01    0.43
  -8   8  -1   12.06    0.81
  -8   8  -1   13.04    1.76
   8  -8   1   13.38    0.87
   8  -8   1   11.79    0.79
  -8  -7   1    0.11    1.14
  -8  -7   1    0.23    0.92
  -8  -7   1   -0.81    0.81
  -7  -7   1   31.40    2.26
  -7  -7   1   31.62    1.98
  -7  -7   1   29.70    1.89
  -6  -7   1    1.99    1.01
  -6  -7   1    0.40    0.77
  -6  -7   1   -0.10    0.79
  -5  -7   1    8.63    1.08
  -5  -7   1    7.00    0.99
  -5  -7   1    8.27    1.24
   4   7  -1    7.99    0.88
  -4  -7   1    7.92    0.95
  -4  -7   1    6.77    0.89
  -4  -7   1    7.46    1.10
   3   7  -1    7.21    0.80
  -3  -7   1    7.11    0.89
  -3  -7   1    5.75    0.79
  -3  -7   1    5.72    0.97
   2   7  -1   -0.29    0.49
   2   7  -1   -0.51    0.43
  -2  -7   1    0.14    0.51
  -2  -7   1   -0.34    0.76
  -2  -7   1   -0.26    0.43
  -2  -7   1    0.68    0.57
   1   7  -1  114.91    3.47
   1   7  -1  114.99    3.71
   1   7  -1  112.69    3.67
   1   7  -1  110.99    3.46
  -1  -7   1  117.92    3.69
  -1  -7   1  113.73    4.23
  -1  -7   1  107.76    3.47
   0   7  -1   23.47    1.20
   0   7  -1   23.96    1.22
   0   7  -1   23.35    1.10
   0  -7   1   23.63    1.13
   0  -7   1   22.89    1.39
   0  -7   1   22.50    1.34
   0  -7   1   23.07    1.25
  -1   7  -1  120.36    3.93
  -1   7  -1  121.38    5.01
  -1   7  -1  130.05    4.21
  -1   7  -1  130.48    3.98
   1  -7   1  122.30    3.89
   1  -7   1  131.85    4.58
   1  -7   1  122.42    4.52
  -2   7  -1    0.50    0.45
  -2   7  -1    1.21    0.56
  -2   7  -1    0.66    0.38
  -2   7  -1    0.77    0.47
  -2   7  -1    1.66    0.74
  -3   7  -1    7.42    1.06
  -3   7  -1    9.36    0.73
  -3   7  -1    8.08    0.72
  -3   7  -1    7.72    0.92
  -3   7  -1    7.66    0.72
  -3   7  -1    8.11    0.61
   3  -7   1    8.51    0.62
  -4   7  -1    9.83    1.09
  -4   7  -1   10.15    0.66
  -4   7  -1   11.71    1.28
  -4   7  -1   10.49    0.77
  -4   7  -1    9.17    0.75
  -4   7  -1   10.43    0.80
   4  -7   1   10.41    0.67
  -5   7  -1    6.29    1.38
  -5   7  -1    7.09    1.10
  -5   7  -1    7.69    0.58
  -5   7  -1    7.17    0.65
  -5   7  -1    8.13    1.26
  -5   7  -1    7.39    0.68
   5  -7   1    7.87    0.58
  -6   7  -1    3.65    0.56
  -6   7  -1    3.31    1.05
  -6   7  -1    4.34    0.48
  -6   7  -1    3.54    0.49
  -6   7  -1    5.08    1.22
  -6   7  -1    4.56    1.34
   6  -7   1    3.39    0.47
  -7   7  -1   26.76    2.32
  -7   7  -1   23.12    0.98
  -7   7  -1   21.59    1.97
  -7   7  -1   23.30    1.08
  -7   7  -1   27.87    2.29
   7  -7   1   22.53    0.97
  -8   7  -1    1.20    1.13
  -8   7  -1    1.62    1.30
  -8   7  -1    1.13    0.42
  -9   7  -1   11.00    1.73
   9  -7   1   11.48    0.70
  -9  -6   1    0.83    1.21
  -9  -6   1    1.30    0.96
  -9  -6   1    1.33    0.92
  -8  -6   1   13.13    1.36
  -8  -6   1   14.54    1.38
  -8  -6   1   14.69    1.75
  -7  -6   1    2.26    0.87
  -7  -6   1    2.63    1.13
  -7  -6   1    3.16    0.88
  -6  -6   1    4.75    0.93
  -6  -6   1    5.07    1.10
  -6  -6   1    5.21    0.90
  -5  -6   1   29.88    1.59
  -5  -6   1   29.99    1.70
  -5  -6   1   31.84    1.91
   4   6  -1   13.60    0.99
  -4  -6   1   12.19    1.19
  -4  -6   1   11.13    1.02
  -4  -6   1    9.18    0.93
   3   6  -1   52.83    2.04
  -3  -6   1   55.92    2.37
  -3  -6   1   55.18    2.38
  -3  -6   1   54.86    1.97
  -3  -6   1   51.25    2.14
  -3  -6   1   50.83    2.09
   2   6  -1  112.72    3.55
   2   6  -1  112.29    3.35
   2   6  -1  112.22    3.37
  -2  -6   1  113.69    3.61
  -2  -6   1  112.00    4.01
  -2  -6   1  110.99    3.57
  -2  -6   1  109.64    3.36
  -2  -6   1  110.17    4.07
  -2  -6   1  104.96    3.37
   1   6  -1    0.44    0.46
   1   6  -1   -0.31    0.37
   1   6  -1    0.82    0.47
   1   6  -1    0.21    0.36
  -1  -6   1    0.25    0.50
  -1  -6   1    0.81    0.50
  -1  -6   1   -0.12    0.39
  -1  -6   1   -0.07    0.39
  -1  -6   1    0.29    0.44
   0   6  -1  100.32    3.14
   0   6  -1   94.71    2.93
   0   6  -1   95.03    3.10
   0   6  -1   93.30    2.91
   0  -6   1   99.58    2.97
   0  -6   1   96.96    3.58
   0  -6   1   99.85    2.96
   0  -6   1  100.70    3.15
  -1   6  -1   56.78    1.90
  -1   6  -1   60.14    2.82
  -1   6  -1   60.85    2.19
  -1   6  -1   60.40    2.07
  -1   6  -1   57.99    2.03
  -1   6  -1   59.95    1.92
  -1   6  -1   58.71    1.81
   1  -6   1   57.34    2.01
   1  -6   1   56.93    2.33
   1  -6   1   56.70    2.34
   1  -6   1   57.69    1.92
  -2   6  -1    4.05    0.47
  -2   6  -1    4.19    0.49
  -2   6  -1    5.48    0.58
  -2   6  -1    5.25    0.69
  -2   6  -1    5.24    0.55
  -2   6  -1    4.27    0.44
  -2   6  -1    4.17    0.83
  -2   6  -1    4.31    0.54
   2  -6   1    4.12    0.49
   2  -6   1    5.13    0.47
   2  -6   1    4.49    0.63
   2  -6   1    4.51    0.61
  -3   6  -1  201.80    5.20
  -3   6  -1  196.79    6.53
  -3   6  -1  202.32    7.40
  -3   6  -1  196.41    5.62
  -3   6  -1  202.82    5.77
  -3   6  -1  187.65    5.78
   3  -6   1  200.67    5.13
   3  -6   1  198.06    6.62
  -4   6  -1    2.97    0.36
  -4   6  -1    3.29    0.50
  -4   6  -1    2.73    0.43
  -4   6  -1    3.53    0.46
  -4   6  -1    2.63    0.74
  -4   6  -1    2.48    0.85
   4  -6   1    2.78    0.37
  -5   6  -1  197.71    7.36
  -5   6  -1  186.03    5.48
  -5   6  -1  187.47    4.98
  -5   6  -1  184.34    6.49
  -5   6  -1  192.03    5.36
  -5   6  -1  198.40    4.94
  -5   6  -1  175.99    6.89
   5  -6   1  188.38    4.85
  -6   6  -1    5.37    1.34
  -6   6  -1    6.11    0.52
  -6   6  -1    6.82    0.46
  -6   6  -1    6.63    1.12
  -6   6  -1    6.76    0.50
  -6   6  -1    6.62    0.57
  -6   6  -1    6.34    1.18
   6  -6   1    6.61    0.46
  -7   6  -1   36.89    1.20
  -7   6  -1   35.46    1.27
  -7   6  -1   38.42    1.38
  -7   6  -1   43.05    2.68
  -7   6  -1   38.45    2.63
  -7   6  -1   37.20    2.33
  -8   6  -1   12.56    0.64
  -8   6  -1   11.25    0.69
  -8   6  -1   11.61    1.63
  -8   6  -1   10.19    1.70
  -8   6  -1   10.61    0.64
  -9   6  -1   -0.14    1.14
  -9  -5   1    1.91    1.26
  -9  -5   1    2.15    0.87
  -8  -5   1    3.82    0.90
  -8  -5   1    4.77    1.24
  -8  -5   1    4.88    0.98
  -7  -5   1    1.12    0.72
  -7  -5   1   -1.29    0.84
  -7  -5   1    0.77    0.70
  -6  -5   1  115.56    4.49
  -6  -5   1  116.23    3.95
  -6  -5   1  117.94    3.95
  -5  -5   1    0.48    0.68
  -5  -5   1    1.16    0.58
  -5  -5   1    0.23    0.54
  -4  -5   1  216.93    7.21
  -4  -5   1  225.99    6.57
  -4  -5   1  209.58    6.49
   3   5  -1   43.44    1.91
   3   5  -1   41.30    1.55
   3   5  -1   41.00    1.63
   3   5  -1   39.57    1.52
  -3  -5   1   44.03    1.95
  -3  -5   1   38.92    1.64
  -3  -5   1   41.73    1.56
  -3  -5   1   43.88    1.89
  -3  -5   1   41.02    1.56
  -3  -5   1   41.69    1.74
   2   5  -1  104.42    3.09
   2   5  -1  102.46    3.71
   2   5  -1  107.33    3.24
   2   5  -1  103.12    3.06
  -2  -5   1  101.06    3.08
  -2  -5   1  106.02    3.70
  -2  -5   1  100.99    3.72
  -2  -5   1  103.42    3.72
  -2  -5   1   98.01    3.26
  -2  -5   1  103.45    3.30
  -2  -5   1  104.15    3.08
   1   5  -1  247.26    6.62
   1   5  -1  244.80    6.62
   1   5  -1  248.80    7.03
   1   5  -1  247.88    7.08
   1   5  -1  252.25    8.05
  -1  -5   1  233.29    6.62
  -1  -5   1  241.81    8.06
  -1  -5   1  249.24    7.05
  -1  -5   1  246.74    8.06
  -1  -5   1  228.01    6.61
   0   5  -1   18.64    1.00
   0   5  -1   17.87    0.81
   0   5  -1   16.61    0.94
   0   5  -1   19.10    0.95
   0   5  -1   17.92    0.81
   0   5  -1   16.33    0.77
   0  -5   1   16.32    0.99
   0  -5   1   16.98    0.98
   0  -5   1   19.43    0.83
   0  -5   1   16.84    0.87
   0  -5   1   17.26    0.81
  -1   5  -1  420.86   13.61
  -1   5  -1  430.67   11.21
  -1   5  -1  434.83   12.03
  -1   5  -1  433.21   10.86
  -1   5  -1  434.80   14.91
  -1   5  -1  417.04   11.21
  -1   5  -1  420.26   11.94
   1  -5   1  411.94   13.67
   1  -5   1  435.01   13.67
   1  -5   1  431.63   11.23
  -2   5  -1   19.39    0.93
  -2   5  -1   18.61    1.10
  -2   5  -1   20.88    0.95
  -2   5  -1   18.98    0.90
  -2   5  -1   19.52    0.81
  -2   5  -1   18.60    0.77
  -2   5  -1   18.85    0.92
  -2   5  -1   18.92    0.80
  -2   5  -1   21.86    1.48
   2  -5   1   19.65    0.82
   2  -5   1   19.79    1.02
   2  -5   1   19.22    0.78
   2  -5   1   18.57    0.99
  -3   5  -1  111.49    3.05
  -3   5  -1  104.09    3.30
  -3   5  -1  111.68    4.37
  -3   5  -1  109.74    3.07
  -3   5  -1  107.89    3.82
  -3   5  -1  110.57    3.30
  -3   5  -1  112.55    2.94
  -3   5  -1  109.12    2.97
  -3   5  -1  113.55    3.22
   3  -5   1  108.86    2.89
   3  -5   1  108.94    3.08
   3  -5   1  111.93    3.78
   3  -5   1  109.78    3.77
  -4   5  -1   35.49    1.09
  -4   5  -1   39.28    1.17
  -4   5  -1   37.27    1.32
  -4   5  -1   33.50    1.28
  -4   5  -1   36.56    2.09
  -4   5  -1   34.91    1.14
  -4   5  -1   36.51    1.27
  -4   5  -1   34.71    1.77
   4  -5   1   37.51    1.49
   4  -5   1   35.06    1.12
  -5   5  -1    1.33    0.32
  -5   5  -1    1.14    0.21
  -5   5  -1    1.86    0.68
  -5   5  -1    0.92    0.30
  -5   5  -1    1.79    0.82
  -5   5  -1    0.22    0.85
  -5   5  -1    0.67    0.32
   5  -5   1    1.05    0.38
  -6   5  -1    1.97    1.03
  -6   5  -1    1.35    0.85
  -6   5  -1    1.13    0.27
  -6   5  -1    0.66    0.89
  -6   5  -1    2.05    0.37
  -7   5  -1   23.29    2.08
  -7   5  -1   22.83    1.75
  -7   5  -1   24.83    2.11
  -8   5  -1    5.34    1.43
  -8   5  -1    7.99    1.52
  -8   5  -1    8.64    1.44
  -9   5  -1   14.76    1.82
  -9  -4   1    1.88    0.76
  -9  -4   1    0.50    1.10
  -8  -4   1   39.24    1.93
  -8  -4   1   40.01    2.50
  -8  -4   1   44.83    2.03
  -7  -4   1   -0.15    0.63
  -7  -4   1    0.56    0.62
  -7  -4   1    0.28    0.89
   6   4  -1   51.21    1.73
  -6  -4   1   48.04    2.39
  -6  -4   1   52.36    2.10
  -6  -4   1   50.57    2.08
   5   4  -1   -0.02    0.35
  -5  -4   1    0.78    0.50
  -5  -4   1    0.53    0.66
  -5  -4   1    0.22    0.49
   4   4  -1   26.22    1.04
  -4  -4   1   23.55    1.24
  -4  -4   1   25.01    1.07
  -4  -4   1   28.25    1.55
  -4  -4   1   28.12    1.30
   3   4  -1    1.28    0.36
   3   4  -1    1.63    0.42
   3   4  -1    2.01    0.51
   3   4  -1    0.79    0.37
   3   4  -1    1.91    0.37
  -3  -4   1    1.67    0.43
  -3  -4   1    1.86    0.41
  -3  -4   1    2.08    0.60
  -3  -4   1    1.80    0.42
  -3  -4   1    1.88    0.45
  -3  -4   1    1.95    0.38
  -3  -4   1    1.36    0.45
   2   4  -1  165.56    4.64
   2   4  -1  168.74    4.65
   2   4  -1  167.10    5.64
   2   4  -1  173.62    4.92
  -2  -4   1  171.64    4.93
  -2  -4   1  173.97    4.67
  -2  -4   1  162.41    5.61
  -2  -4   1  176.25    5.49
  -2  -4   1  170.97    4.97
  -2  -4   1  161.17    5.62
  -2  -4   1  159.54    4.64
   1   4  -1   33.76    1.18
   1   4  -1   35.26    1.43
   1   4  -1   32.40    1.17
   1   4  -1   35.51    1.27
  -1  -4   1   34.26    1.27
  -1  -4   1   32.68    1.43
  -1  -4   1   35.19    1.20
  -1  -4   1   32.85    1.19
  -1  -4   1   34.03    1.44
   0   4  -1  497.57   12.70
   0   4  -1  493.08   15.95
   0   4  -1  501.67   13.11
   0   4  -1  479.03   13.10
   0   4  -1  520.43   14.07
   0   4  -1  513.78   13.97
   0  -4   1  512.70   13.96
   0  -4   1  490.30   13.11
   0  -4   1  525.40   15.99
   0  -4   1  500.53   13.11
   0  -4   1  499.59   15.98
  -1   4  -1    0.20    0.27
  -1   4  -1   -0.01    0.23
  -1   4  -1   -0.26    0.22
  -1   4  -1    0.22    0.27
  -1   4  -1   -0.05    0.22
  -1   4  -1    0.64    0.49
  -1   4  -1    0.11    0.21
   1  -4   1    0.11    0.22
   1  -4   1   -0.14    0.26
  -2   4  -1   58.21    1.62
  -2   4  -1   57.30    1.72
  -2   4  -1   56.94    1.84
  -2   4  -1   58.93    1.79
  -2   4  -1   62.11    2.55
  -2   4  -1   59.88    1.66
   2  -4   1   60.90    1.62
   2  -4   1   57.67    1.72
   2  -4   1   56.37    2.09
  -3   4  -1   11.83    0.63
  -3   4  -1    9.80    0.61
  -3   4  -1    9.76    0.44
  -3   4  -1    9.67    0.50
  -3   4  -1    9.85    0.64
  -3   4  -1   10.17    0.50
  -3   4  -1   11.58    0.92
  -3   4  -1   11.90    1.06
  -3   4  -1   11.68    0.49
   3  -4   1    9.79    0.49
   3  -4   1   10.54    0.65
   3  -4   1   11.88    0.65
  -4   4  -1    0.57    0.26
  -4   4  -1    0.34    0.67
  -4   4  -1    0.33    0.26
  -4   4  -1    0.32    0.28
  -4   4  -1    0.52    0.56
  -4   4  -1    0.36    0.53
   4  -4   1   -0.10    0.28
   4  -4   1    0.12    0.17
  -5   4  -1   23.62    1.68
  -5   4  -1   23.44    0.87
  -5   4  -1   25.71    1.84
  -5   4  -1   22.69    1.42
  -5   4  -1   24.37    0.94
   5  -4   1   24.85    1.03
  -6   4  -1   18.66    1.44
  -6   4  -1   21.91    1.76
  -6   4  -1   24.94    1.94
  -7   4  -1    7.24    1.35
  -7   4  -1    6.24    1.19
  -7   4  -1    6.50    1.27
  -8   4  -1   28.21    2.26
  -8   4  -1   21.23    1.97
  -9   4  -1    1.30    0.41
  -9   4  -1    2.24    1.23
 -10   4  -1    3.53    1.37
  10  -4   1    4.17    0.49
 -10  -3   1    5.26    0.89
  -9  -3   1   11.97    1.06
  -9  -3   1   11.44    1.65
   8   3  -1    4.85    0.68
  -8  -3   1    6.57    0.84
  -8  -3   1    6.43    0.89
  -8  -3   1    7.65    1.39
   7   3  -1   18.37    1.06
  -7  -3   1   19.10    1.20
  -7  -3   1   17.13    1.63
  -7  -3   1   20.18    1.27
  -7  -3   1   17.11    1.19
   6   3  -1   13.52    0.85
   6   3  -1   14.46    0.85
  -6  -3   1   12.35    1.25
  -6  -3   1   13.90    0.88
  -6  -3   1   12.61    0.93
  -6  -3   1   13.01    0.92
  -6  -3   1   13.99    0.99
   5   3  -1   -0.32    0.31
   5   3  -1    0.26    0.32
  -5  -3   1    0.20    0.34
  -5  -3   1   -0.15    0.62
  -5  -3   1    0.85    0.42
  -5  -3   1    0.13    0.37
  -5  -3   1    0.07    0.44
   4   3  -1  145.46    4.90
   4   3  -1  141.93    3.77
   4   3  -1  142.31    3.78
   4   3  -1  137.69    3.99
   4   3  -1  142.29    4.02
  -4  -3   1  144.50    4.32
  -4  -3   1  139.73    4.28
  -4  -3   1  142.97    4.02
  -4  -3   1  142.18    3.84
  -4  -3   1  146.65    4.16
  -4  -3   1  143.07    4.76
  -4  -3   1  145.49    4.77
  -4  -3   1  141.34    4.86
   3   3  -1    5.10    0.46
   3   3  -1    6.25    0.49
   3   3  -1    6.12    0.44
   3   3  -1    6.41    0.60
   3   3  -1    5.91    0.42
  -3  -3   1    7.56    0.73
  -3  -3   1    6.80    0.52
  -3  -3   1    5.64    0.55
  -3  -3   1    6.39    0.49
  -3  -3   1    6.82    0.54
  -3  -3   1    6.54    0.57
  -3  -3   1    6.72    0.57
  -3  -3   1    6.61    0.46
   2   3  -1   95.44    2.81
   2   3  -1  102.97    3.44
   2   3  -1   97.95    2.82
  -2  -3   1   99.81    3.02
  -2  -3   1   97.54    2.82
  -2  -3   1  103.21    2.84
  -2  -3   1  102.97    3.42
  -2  -3   1  101.33    3.42
  -2  -3   1   98.53    2.70
  -2  -3   1   98.52    3.01
   1   3  -1   84.96    2.80
   1   3  -1   79.67    2.29
   1   3  -1   75.97    2.29
  -1  -3   1   81.54    2.80
  -1  -3   1   81.93    2.46
  -1  -3   1   81.07    2.79
  -1  -3   1   81.85    2.31
  -1  -3   1   77.63    2.30
   0   3  -1   12.11    0.53
   0   3  -1   12.60    0.68
   0   3  -1   13.17    0.55
   0   3  -1   12.20    0.54
   0  -3   1   11.81    0.66
   0  -3   1   12.88    0.57
   0  -3   1   12.78    0.54
   0  -3   1   12.53    0.67
  -1   3  -1  404.46   10.21
  -1   3  -1  418.71   11.29
  -1   3  -1  401.11   10.51
  -1   3  -1  409.11   13.96
  -1   3  -1  395.63   12.78
  -1   3  -1  404.34   10.18
  -1   3  -1  407.98   10.52
   1  -3   1  400.14   12.81
   1  -3   1  392.69   10.51
   1  -3   1  416.80   12.81
  -2   3  -1  358.38   12.13
  -2   3  -1  345.56    8.75
  -2   3  -1  351.71    9.74
  -2   3  -1  322.41    8.78
  -2   3  -1  350.53    9.07
  -2   3  -1  353.28    9.06
   2  -3   1  352.20    9.07
   2  -3   1  368.57   11.05
   2  -3   1  343.77   11.05
  -3   3  -1   59.11    1.61
  -3   3  -1   60.60    1.66
  -3   3  -1   59.32    1.79
  -3   3  -1   60.34    2.25
  -3   3  -1   57.45    1.79
   3  -3   1   58.66    2.02
   3  -3   1   59.40    1.64
   3  -3   1   58.53    2.01
  -4   3  -1  444.91   12.17
  -4   3  -1  437.28   12.25
  -4   3  -1  432.18   14.23
  -4   3  -1  434.21   13.76
  -4   3  -1  430.51   15.41
  -4   3  -1  442.56   12.26
   4  -3   1  465.29   13.94
   4  -3   1  446.14   13.90
  -5   3  -1    7.81    0.92
  -5   3  -1    8.72    1.10
  -5   3  -1    8.73    0.56
  -5   3  -1    8.39    0.46
  -5   3  -1    8.00    1.06
  -6   3  -1   60.10    2.59
  -6   3  -1   58.27    3.00
  -6   3  -1   58.89    2.87
  -7   3  -1   12.19    1.37
  -7   3  -1   11.54    1.46
  -7   3  -1    9.49    1.41
  -8   3  -1    3.96    1.26
  -8   3  -1    2.68    1.11
  -9   3  -1   11.70    0.65
  -9   3  -1   11.57    1.61
  -9   3  -1   10.05    1.65
  -9   3  -1   11.14    0.73
  10  -3   1    0.34    0.45
 -10  -2   1    1.47    0.63
   9   2  -1    1.83    0.57
  -9  -2   1    0.56    0.57
  -9  -2   1    1.17    0.61
  -9  -2   1   -0.17    1.11
   8   2  -1    0.46    0.47
  -8  -2   1    0.02    0.52
  -8  -2   1   -0.79    0.51
  -8  -2   1    0.29    0.98
   7   2  -1   28.68    1.17
   7   2  -1   32.87    1.22
  -7  -2   1   31.46    1.37
  -7  -2   1   29.89    1.40
  -7  -2   1   32.16    1.49
  -7  -2   1   31.52    2.06
  -7  -2   1   30.96    1.26
   6   2  -1    1.99    0.38
   6   2  -1    1.95    0.36
  -6  -2   1    1.88    0.46
  -6  -2   1    2.05    0.47
  -6  -2   1    1.61    0.41
  -6  -2   1    2.45    0.41
  -6  -2   1    1.42    0.78
  -6  -2   1    2.81    0.52
   5   2  -1  222.64    5.64
   5   2  -1  219.69    5.65
  -5  -2   1  213.59    6.42
  -5  -2   1  220.10    6.20
  -5  -2   1  217.17    5.76
  -5  -2   1  223.52    7.33
  -5  -2   1  217.85    5.75
  -5  -2   1  233.84    6.40
  -5  -2   1  223.38    7.03
   4   2  -1    9.41    0.58
   4   2  -1   11.09    0.61
   4   2  -1   12.18    0.80
   4   2  -1   11.14    0.58
   4   2  -1   11.62    0.59
  -4  -2   1   11.60    0.69
  -4  -2   1   10.68    0.72
  -4  -2   1   12.17    0.58
  -4  -2   1   12.06    0.62
  -4  -2   1   12.67    0.61
  -4  -2   1   13.14    0.99
  -4  -2   1   10.82    0.56
  -4  -2   1   11.28    0.56
  -4  -2   1   11.71    0.69
   3   2  -1  598.42   14.69
   3   2  -1  577.04   14.69
   3   2  -1  612.21   18.78
   3   2  -1  600.84   15.41
   3   2  -1  608.71   15.41
  -3  -2   1  600.90   18.24
  -3  -2   1  595.26   18.70
  -3  -2   1  561.85   18.69
  -3  -2   1  599.72   16.43
  -3  -2   1  604.51   16.55
  -3  -2   1  604.70   15.41
  -3  -2   1  581.59   14.94
  -3  -2   1  584.82   14.94
   2   2  -1  341.99    8.31
   2   2  -1  337.34   10.64
   2   2  -1  342.39    8.74
   2   2  -1  330.80    8.73
   2   2  -1  321.68   10.62
  -2  -2   1  342.04    9.37
  -2  -2   1  337.24   10.61
  -2  -2   1  344.42    8.74
  -2  -2   1  327.96   10.61
  -2  -2   1  328.01    8.45
  -2  -2   1  324.48    8.72
   1   2  -1  365.19    9.51
   1   2  -1  352.23   11.58
  -1  -2   1  364.06   11.58
  -1  -2   1  361.35   11.58
  -1  -2   1  379.80    9.51
  -1  -2   1  374.50    9.51
   0   2  -1  632.44   15.61
   0   2  -1  595.00   15.60
   0   2  -1  621.35   19.21
   0   2  -1  576.52   15.16
   0  -2   1  614.12   15.77
   0  -2   1  599.04   19.02
   0  -2   1  606.44   19.20
  -1   2  -1    4.32    0.32
  -1   2  -1    2.87    0.22
  -1   2  -1    2.60    0.20
  -1   2  -1    3.07    0.43
  -1   2  -1    2.58    0.16
   1  -2   1    2.66    0.22
   1  -2   1    2.69    0.26
   1  -2   1    2.16    0.25
  -2   2  -1  115.20    4.30
  -2   2  -1  115.13    3.33
  -2   2  -1  117.93    3.11
   2  -2   1  114.93    3.09
   2  -2   1  122.50    3.76
  -3   2  -1   14.42    1.16
  -3   2  -1   15.61    0.48
  -3   2  -1   14.63    0.93
  -3   2  -1   15.93    1.10
  -3   2  -1   15.46    0.47
  -3   2  -1   15.83    0.59
  -3   2  -1   16.43    0.95
   3  -2   1   14.67    0.61
   3  -2   1   15.00    0.49
  -4   2  -1   53.43    1.62
  -4   2  -1   52.30    2.09
  -4   2  -1   50.14    2.13
  -4   2  -1   48.07    2.34
  -4   2  -1   50.58    2.34
   4  -2   1   54.54    1.78
  -5   2  -1    4.30    0.87
  -5   2  -1    1.50    0.64
  -5   2  -1    1.77    0.68
  -5   2  -1    1.92    0.67
  -5   2  -1    1.93    0.26
  -6   2  -1    2.87    0.88
  -6   2  -1    2.75    0.84
  -6   2  -1    1.84    0.80
  -6   2  -1    2.10    0.72
  -6   2  -1    3.03    0.29
  -7   2  -1    5.15    1.05
  -7   2  -1    4.95    1.19
  -8   2  -1   46.16    2.71
  -8   2  -1   42.68    2.44
  -8   2  -1   40.31    1.30
  -8   2  -1   42.27    1.42
  -9   2  -1    2.42    0.42
  -9   2  -1    1.46    0.42
  -9   2  -1    2.09    0.52
  -9   2  -1    2.40    1.19
   9  -2   1    1.80    0.45
 -10   2  -1    7.66    0.54
  10  -2   1    8.85    0.70
  10   1  -1    0.59    0.55
 -10  -1   1    0.48    0.53
   9   1  -1   34.10    1.41
  -9  -1   1   37.36    1.48
  -9  -1   1   38.06    1.52
  -9  -1   1   35.59    1.52
   8   1  -1    1.53    0.44
  -8  -1   1    0.87    1.01
  -8  -1   1    1.73    0.52
  -8  -1   1    1.59    0.46
  -8  -1   1    1.13    0.51
   7   1  -1   89.27    2.54
   7   1  -1   92.45    2.55
  -7  -1   1   91.31    2.94
  -7  -1   1   94.90    2.87
  -7  -1   1   92.97    2.65
  -7  -1   1   93.14    3.51
  -7  -1   1   93.62    2.64
  -7  -1   1   92.08    3.85
   6   1  -1    1.79    0.29
   6   1  -1    1.72    0.28
  -6  -1   1    1.56    0.34
  -6  -1   1    1.95    0.41
  -6  -1   1    1.55    0.72
  -6  -1   1    1.27    0.32
  -6  -1   1    1.44    0.59
  -6  -1   1    1.85    0.45
  -6  -1   1    2.13    0.39
   5   1  -1   69.14    1.85
   5   1  -1   73.13    2.03
   5   1  -1   68.90    1.85
  -5  -1   1   72.86    2.24
  -5  -1   1   71.59    1.95
  -5  -1   1   73.76    2.62
  -5  -1   1   74.44    2.03
  -5  -1   1   66.23    1.94
  -5  -1   1   69.91    2.23
  -5  -1   1   70.15    2.14
  -5  -1   1   68.28    2.83
   4   1  -1   15.34    0.61
   4   1  -1   16.54    0.81
   4   1  -1   14.24    0.63
  -4  -1   1   16.65    1.07
  -4  -1   1   15.01    0.62
  -4  -1   1   14.69    0.72
  -4  -1   1   15.95    0.66
  -4  -1   1   16.18    0.77
  -4  -1   1   14.35    0.57
  -4  -1   1   15.16    0.57
   3   1  -1   53.68    1.87
   3   1  -1   55.04    1.54
   3   1  -1   54.82    1.87
   3   1  -1   52.72    1.53
  -3  -1   1   53.13    1.65
  -3  -1   1   54.44    1.97
  -3  -1   1   51.48    1.43
  -3  -1   1   53.13    1.53
  -3  -1   1   51.46    1.43
   2   1  -1  244.07    6.17
   2   1  -1  233.70    6.16
   2   1  -1  233.98    7.50
   2   1  -1  229.74    5.83
   2   1  -1  244.99    7.50
   2   1  -1  238.77    5.83
  -2  -1   1  233.08    7.47
  -2  -1   1  238.15    7.46
  -2  -1   1  233.94    5.94
  -2  -1   1  231.33    5.95
  -2  -1   1  237.30    6.61
   1   1  -1  494.58   12.06
   1   1  -1  473.51   14.69
   1   1  -1  458.56   14.70
   1   1  -1  463.91   12.06
  -1  -1   1  449.88   11.72
  -1  -1   1  470.05   14.93
  -1  -1   1  472.61   12.06
  -1  -1   1  465.95   14.69
  -1   1  -1  403.67   11.27
  -1   1  -1  457.68   14.75
  -1   1  -1  439.81   13.77
   1  -1   1  449.86   13.88
   1  -1   1  422.40   11.16
  -2   1  -1   50.68    1.95
  -2   1  -1   51.15    1.41
  -2   1  -1   51.10    1.53
   2  -1   1   53.17    1.70
   2  -1   1   50.86    1.42
  -3   1  -1   34.00    1.61
  -3   1  -1   33.40    1.09
  -3   1  -1   32.74    1.59
  -3   1  -1   34.38    1.50
  -3   1  -1   33.70    0.96
   3  -1   1   35.00    1.00
   3  -1   1   34.76    0.98
   3  -1   1   34.45    1.22
  -4   1  -1  137.78    4.58
  -4   1  -1  140.52    3.57
  -4   1  -1  132.26    3.94
  -4   1  -1  134.63    4.82
  -4   1  -1  140.68    3.92
  -4   1  -1  132.34    5.16
  -4   1  -1  140.14    3.94
  -4   1  -1  137.51    4.69
   4  -1   1  137.18    3.61
   4  -1   1  140.62    3.63
   4  -1   1  138.24    4.51
  -5   1  -1   44.01    2.19
  -5   1  -1   43.68    1.48
  -5   1  -1   45.45    1.48
  -5   1  -1   44.83    1.44
  -5   1  -1   46.12    2.13
  -5   1  -1   45.12    1.98
  -5   1  -1   40.74    2.28
  -6   1  -1   38.09    1.93
  -6   1  -1   42.18    2.15
  -6   1  -1   38.77    1.30
  -6   1  -1   36.98    2.06
  -6   1  -1   39.80    2.24
  -6   1  -1   37.22    1.08
  -6   1  -1   38.06    1.38
  -6   1  -1   36.24    1.12
  -7   1  -1   38.35    2.41
  -7   1  -1   38.34    2.43
  -7   1  -1   40.39    1.25
  -7   1  -1   42.77    2.18
  -7   1  -1   40.72    1.35
  -8   1  -1    2.11    0.42
  -8   1  -1    3.27    1.11
  -8   1  -1    2.34    1.06
  -8   1  -1    2.22    0.51
   8  -1   1    1.28    0.42
  -9   1  -1   10.60    0.80
  -9   1  -1   10.43    0.75
  -9   1  -1   10.47    0.73
   9  -1   1    8.99    0.72
 -10   1  -1    1.36    0.49
  10  -1   1    2.30    0.58
  10   0  -1    4.97    0.61
 -10   0   1    5.40    0.62
   9   0  -1    4.60    0.53
  -9   0   1    4.60    0.57
  -9   0   1    5.05    0.59
   8   0  -1   18.75    0.81
   8   0  -1   18.95    0.82
  -8   0   1   19.68    0.89
  -8   0   1   17.74    0.93
  -8   0   1   19.69    0.90
  -8   0   1   19.08    0.91
  -8   0   1   21.67    1.62
  -7   0   1   12.84    0.76
  -7   0   1   12.42    0.71
  -7   0   1   12.45    0.64
  -7   0   1   13.64    1.26
  -7   0   1   12.84    0.63
  -7   0   1   14.61    1.49
  -6   0   1    0.96    0.31
  -6   0   1    0.60    0.29
  -6   0   1    0.62    0.24
  -6   0   1    1.08    0.22
  -6   0   1    0.82    0.30
  -6   0   1    0.44    0.71
  -6   0   1    0.63    0.63
   5   0  -1  152.30    3.83
   5   0  -1  144.37    3.82
  -5   0   1  146.43    4.88
  -5   0   1  139.96    5.04
  -5   0   1  144.64    5.03
  -5   0   1  147.07    4.19
  -5   0   1  148.21    4.17
  -5   0   1  142.10    4.19
   4   0  -1   35.05    1.25
   4   0  -1   34.16    1.00
   4   0  -1   34.41    0.99
   4   0  -1   34.06    1.24
  -4   0   1   32.31    1.54
  -4   0   1   34.06    0.97
  -4   0   1   32.43    1.11
  -4   0   1   36.75    1.49
  -4   0   1   35.26    1.54
  -4   0   1   33.79    1.11
   3   0  -1  133.50    4.32
   3   0  -1  137.46    3.55
   3   0  -1  134.25    3.55
   3   0  -1  141.80    4.32
  -3   0   1  133.52    4.42
  -3   0   1  131.68    3.82
  -3   0   1  136.75    4.46
  -3   0   1  134.62    3.54
   2   0  -1   66.39    1.81
   2   0  -1   69.72    2.18
   2   0  -1   68.23    1.81
   2   0  -1   66.26    2.20
  -2   0   1   68.78    1.80
   1   0  -1   84.86    2.76
   1   0  -1   93.08    2.79
   1   0  -1   87.39    2.28
  -1   0   1   93.48    2.75
  -1   0   1   75.25    2.75
   0   0  -1    0.00    0.04
   0   0  -1    0.02    0.07
   0   0   1   -0.02    0.04
   0   0   1    0.02    0.05
  -1   0  -1  219.79    5.80
  -1   0  -1  233.19    5.99
  -1   0  -1  230.09    5.79
  -1   0  -1  239.42    7.88
   1   0   1  230.43    6.00
   1   0   1  230.66    7.32
   1   0   1  235.68    6.00
  -2   0  -1   67.48    2.17
  -2   0  -1   68.45    2.17
  -2   0  -1   68.72    2.41
  -2   0  -1   65.08    1.72
  -2   0  -1   67.50    1.85
  -2   0  -1   68.48    1.99
   2   0   1   67.53    1.86
   2   0   1   68.25    1.86
   2   0   1   69.99    2.29
  -3   0  -1  649.22   16.48
  -3   0  -1  610.36   21.81
  -3   0  -1  626.74   19.64
  -3   0  -1  610.22   15.96
  -3   0  -1  635.61   17.72
  -3   0  -1  640.37   20.04
   3   0   1  672.77   16.50
   3   0   1  651.97   16.50
   3   0   1  668.91   20.14
  -4   0  -1    6.36    0.71
  -4   0  -1    5.13    0.31
  -4   0  -1    4.18    0.72
  -4   0  -1    5.66    0.43
  -4   0  -1    5.48    0.37
  -4   0  -1    5.84    0.76
  -4   0  -1    4.94    0.34
  -4   0  -1    5.49    0.42
  -4   0  -1    6.46    0.78
  -4   0  -1    5.94    0.44
   4   0   1    5.63    0.49
   4   0   1    5.28    0.36
   4   0   1    5.84    0.39
  -5   0  -1  303.26    9.89
  -5   0  -1  292.01    9.69
  -5   0  -1  292.19    7.55
  -5   0  -1  286.32    8.43
  -5   0  -1  284.80    7.60
  -5   0  -1  298.17    9.49
  -5   0  -1  305.91    7.77
  -5   0  -1  305.50    8.40
  -5   0  -1  305.94    8.44
   5   0   1  312.76    7.85
  -6   0  -1   28.95    1.18
  -6   0  -1   26.34    1.81
  -6   0  -1   25.88    1.14
  -6   0  -1   26.78    1.03
  -6   0  -1   29.43    1.80
  -6   0  -1   26.97    0.95
  -6   0  -1   26.36    1.58
   6   0   1   26.65    0.91
   6   0   1   26.24    0.84
  -7   0  -1   67.47    2.82
  -7   0  -1   65.26    1.91
  -7   0  -1   64.34    1.99
  -7   0  -1   62.99    3.15
  -7   0  -1   66.92    3.15
  -7   0  -1   59.42    2.17
   7   0   1   61.65    1.89
  -8   0  -1   35.01    2.43
  -8   0  -1   39.56    1.62
  -8   0  -1   39.16    1.52
  -8   0  -1   39.97    1.56
  -8   0  -1   41.50    1.46
   8   0   1   39.44    1.45
  -9   0  -1    1.46    0.59
  -9   0  -1    0.21    0.51
  -9   0  -1    0.08    0.50
   9   0   1    0.48    0.53
 -10   0  -1   11.73    0.89
  10   0   1   12.42    0.94
  10  -1  -1    0.12    0.41
   9  -1  -1    0.03    0.32
  -9   1   1   -0.22    0.93
  -9   1   1   -0.23    0.35
  -9   1   1   -0.16    0.36
  -8   1   1    8.82    1.22
  -8   1   1    6.28    0.45
  -8   1   1    6.39    0.46
  -8   1   1    6.35    0.52
  -7   1   1    1.45    0.31
  -7   1   1    1.80    0.83
  -7   1   1    1.37    0.78
  -6   1   1  125.33    3.58
  -6   1   1  131.93    4.59
  -6   1   1  125.84    4.47
  -6   1   1  122.51    3.58
   5  -1  -1    4.58    0.35
   5  -1  -1    4.53    0.37
  -5   1   1    4.01    0.28
  -5   1   1    4.52    0.28
  -5   1   1    3.74    0.69
  -5   1   1    4.33    0.69
  -5   1   1    4.14    0.73
  -4   1   1  349.35   10.57
  -4   1   1  327.14   11.83
  -4   1   1  338.39    9.35
  -4   1   1  326.52   10.66
  -4   1   1  348.03   10.78
  -4   1   1  340.33    9.34
  -3   1   1   39.80    1.54
  -3   1   1   37.35    1.59
  -3   1   1   37.85    1.69
  -3   1   1   38.36    1.12
   2  -1  -1   29.16    0.79
  -2   1   1   28.19    0.77
  -2   1   1   28.86    0.78
   1  -1  -1  892.80   26.73
   1  -1  -1  863.06   21.91
  -1   1   1  878.56   22.04
  -1   1   1  851.79   26.64
  -1   1   1  749.02   26.70
  -1   1   1  862.07   28.92
  -1  -1  -1  906.99   23.30
  -1  -1  -1  920.49   23.72
  -1  -1  -1  942.37   24.00
  -1  -1  -1  870.03   28.48
  -1  -1  -1  895.18   29.21
  -1  -1  -1  932.28   23.22
   1   1   1  905.66   24.06
   1   1   1 1000.00   24.02
   1   1   1  946.90   29.22
  -2  -1  -1  132.85    3.79
  -2  -1  -1  130.25    3.39
  -2  -1  -1  131.89    3.55
  -2  -1  -1  126.75    3.52
  -2  -1  -1  132.35    4.36
  -2  -1  -1  129.55    3.42
   2   1   1  125.64    3.52
   2   1   1  136.37    4.32
   2   1   1  138.42    3.55
   2   1   1  132.32    3.34
  -3  -1  -1  369.09    9.39
  -3  -1  -1  380.44   11.73
  -3  -1  -1  375.31    9.71
  -3  -1  -1  374.97   11.65
  -3  -1  -1  358.15   11.84
  -3  -1  -1  387.23   10.37
  -3  -1  -1  359.81   11.76
  -3  -1  -1  371.73   10.43
  -3  -1  -1  365.81    9.43
   3   1   1  374.22   11.85
   3   1   1  369.77    9.25
   3   1   1  374.29    9.71
   3   1   1  379.33    9.22
   3   1   1  376.40    9.72
  -4  -1  -1    9.50    0.95
  -4  -1  -1   11.53    0.56
  -4  -1  -1   10.13    0.92
  -4  -1  -1   10.26    0.55
  -4  -1  -1    9.71    0.64
  -4  -1  -1    9.88    0.61
  -4  -1  -1    9.68    0.70
  -4  -1  -1   11.69    0.87
   4   1   1   10.20    0.57
   4   1   1   10.43    0.54
   4   1   1   10.49    0.57
   4   1   1    9.88    0.49
   4   1   1   10.01    0.72
  -5  -1  -1   -0.35    0.26
  -5  -1  -1    0.54    0.34
  -5  -1  -1    0.35    0.62
  -5  -1  -1   -0.29    0.51
  -5  -1  -1   -0.05    0.36
  -5  -1  -1    0.18    0.32
  -5  -1  -1   -0.29    0.25
  -5  -1  -1    0.23    0.62
   5   1   1    0.13    0.24
   5   1   1   -0.24    0.27
  -6  -1  -1    0.63    0.33
  -6  -1  -1    0.36    0.40
  -6  -1  -1    0.69    0.43
  -6  -1  -1   -0.09    0.38
  -6  -1  -1    0.56    0.74
   6   1   1    0.33    0.35
  -7  -1  -1   52.88    1.75
  -7  -1  -1   48.61    2.64
  -7  -1  -1   45.87    1.86
  -7  -1  -1   49.98    1.81
  -7  -1  -1   51.21    1.70
   7   1   1   49.26    1.66
  -8  -1  -1    9.01    0.84
  -8  -1  -1    7.57    0.71
  -8  -1  -1    7.50    0.78
  -8  -1  -1    7.58    0.77
  -8  -1  -1    8.95    1.53
   8   1   1    7.12    0.71
  -9  -1  -1   14.54    1.08
  -9  -1  -1   13.58    1.05
  -9  -1  -1   15.34    1.08
  -9  -1  -1   11.79    1.80
   9   1   1   14.86    1.01
 -10  -1  -1    1.34    0.64
  10   1   1    1.43    0.66
  10  -2  -1   19.59    0.83
 -10   2   1   21.66    2.02
  -9   2   1    1.51    1.04
  -8   2   1   68.64    3.24
  -8   2   1   78.68    3.35
  -7   2   1   -0.73    0.63
  -7   2   1    0.22    0.76
  -6   2   1   85.10    3.32
  -6   2   1   83.18    3.27
  -5   2   1    3.78    0.68
  -5   2   1    3.19    0.66
  -5   2   1    3.80    0.76
  -4   2   1   25.27    1.34
  -4   2   1   24.68    1.39
  -4   2   1   24.28    1.42
  -3   2   1   61.07    2.51
  -3   2   1   66.76    2.32
  -3   2   1   63.96    2.29
  -3   2   1   61.76    1.79
  -3   2   1   60.94    1.79
   2  -2  -1    8.00    0.35
   2  -2  -1    8.28    0.42
   2  -2  -1    9.41    0.36
  -2   2   1    8.74    0.34
  -2   2   1    8.92    0.40
  -2   2   1    8.48    0.71
  -2   2   1    8.77    0.37
   1  -2  -1  134.87    3.57
   1  -2  -1  131.75    4.33
   1  -2  -1  136.94    3.57
  -1   2   1  132.04    4.31
  -1   2   1  131.37    3.46
  -1   2   1  134.65    3.57
  -1   2   1  140.55    4.67
   0  -2  -1  345.54    8.75
   0  -2  -1  339.08    8.74
   0  -2  -1  333.51   10.64
   0   2   1  343.21    8.74
   0   2   1  320.17   10.62
   0   2   1  334.68    8.73
  -1  -2  -1   13.18    0.56
  -1  -2  -1   14.17    0.70
  -1  -2  -1   13.84    0.57
   1   2   1   14.32    0.58
   1   2   1   14.69    0.71
   1   2   1   13.59    0.57
  -2  -2  -1   87.35    2.54
  -2  -2  -1   88.21    2.41
  -2  -2  -1   92.52    3.19
  -2  -2  -1   85.01    2.52
  -2  -2  -1   93.44    2.73
  -2  -2  -1   87.44    3.06
  -2  -2  -1   91.12    2.44
  -2  -2  -1   91.32    2.70
   2   2   1   85.52    2.51
   2   2   1   90.50    3.08
   2   2   1   94.00    2.55
   2   2   1   89.78    2.38
  -3  -2  -1  115.46    3.44
  -3  -2  -1  110.49    3.83
  -3  -2  -1  116.32    4.02
  -3  -2  -1  114.70    3.45
  -3  -2  -1  115.38    3.08
  -3  -2  -1  115.67    3.24
  -3  -2  -1  111.95    3.20
  -3  -2  -1  118.12    3.12
   3   2   1  112.47    3.21
   3   2   1  116.92    3.94
   3   2   1  115.16    3.21
   3   2   1  117.27    3.04
  -4  -2  -1   -0.42    0.32
  -4  -2  -1    0.51    0.35
  -4  -2  -1    1.05    0.66
  -4  -2  -1   -0.35    0.25
  -4  -2  -1    0.44    0.30
  -4  -2  -1    0.63    0.31
  -4  -2  -1    0.20    0.37
  -4  -2  -1    0.08    0.36
  -4  -2  -1    0.06    0.28
   4   2   1    0.19    0.30
   4   2   1    0.49    0.43
   4   2   1    0.30    0.30
   4   2   1    0.14    0.29
  -5  -2  -1   62.96    2.80
  -5  -2  -1   68.87    2.25
  -5  -2  -1   61.62    2.18
  -5  -2  -1   63.37    2.00
  -5  -2  -1   62.09    1.92
   5   2   1   66.36    1.93
  -6  -2  -1    2.57    0.54
  -6  -2  -1    3.03    0.53
  -6  -2  -1    3.65    0.91
  -6  -2  -1    2.50    0.45
  -6  -2  -1    2.63    0.50
  -6  -2  -1    3.15    0.60
   6   2   1    2.77    0.47
  -7  -2  -1   11.45    0.82
  -7  -2  -1    9.07    1.41
  -7  -2  -1   13.03    0.94
  -7  -2  -1    9.75    0.83
  -7  -2  -1   10.65    0.98
  -7  -2  -1    9.87    0.87
   7   2   1   10.14    0.79
  -8  -2  -1   12.63    1.01
  -8  -2  -1   10.81    0.99
  -8  -2  -1   13.67    1.01
  -8  -2  -1    9.51    1.60
   8   2   1   11.98    0.91
  -9  -2  -1    2.84    0.80
  -9  -2  -1    1.01    1.27
  -9  -2  -1    1.69    0.71
 -10   3   1    9.55    1.61
  -9   3   1    9.49    1.50
  -8   3   1    6.40    1.21
  -7   3   1    3.20    0.89
  -7   3   1    3.78    0.92
  -6   3   1   23.80    1.56
  -6   3   1   23.46    1.54
  -6   3   1   20.66    1.61
  -5   3   1   -0.13    0.53
  -5   3   1    1.36    0.61
  -5   3   1    0.26    0.57
   4  -3  -1  144.14    4.48
  -4   3   1  139.14    4.77
  -4   3   1  141.20    3.95
  -4   3   1  143.11    4.86
  -4   3   1  138.61    5.26
  -4   3   1  136.42    3.95
   3  -3  -1   12.57    0.59
   3  -3  -1   13.31    0.48
  -3   3   1   12.60    0.49
  -3   3   1   12.33    0.56
  -3   3   1   13.11    0.49
  -3   3   1   14.16    1.02
  -3   3   1   12.57    0.57
  -3   3   1   14.19    0.95
  -3   3   1   13.33    0.46
   2  -3  -1  177.12    5.71
   2  -3  -1  172.95    4.69
   2  -3  -1  183.79    4.70
  -2   3   1  180.58    4.69
  -2   3   1  166.32    4.53
  -2   3   1  183.14    6.26
  -2   3   1  178.75    5.03
  -2   3   1  178.10    4.68
   1  -3  -1   37.51    1.46
   1  -3  -1   36.98    1.21
   1  -3  -1   39.45    1.21
  -1   3   1   40.30    1.15
  -1   3   1   39.40    1.43
  -1   3   1   40.71    1.57
  -1   3   1   39.84    1.21
  -1   3   1   38.86    1.21
  -1   3   1   38.66    1.29
   0  -3  -1    6.66    0.44
   0  -3  -1    7.06    0.45
   0  -3  -1    5.87    0.51
   0   3   1    7.11    0.47
   0   3   1    6.30    0.43
   0   3   1    6.87    0.41
   0   3   1    7.44    0.56
   0   3   1    6.78    0.44
  -1  -3  -1    4.80    0.45
  -1  -3  -1    4.69    0.51
  -1  -3  -1    3.99    0.39
  -1  -3  -1    4.44    0.40
   1   3   1    3.91    0.37
   1   3   1    3.95    0.45
   1   3   1    4.56    0.41
   1   3   1    3.36    0.37
  -2  -3  -1  144.54    4.10
  -2  -3  -1  147.98    3.92
  -2  -3  -1  147.26    4.37
  -2  -3  -1  149.79    4.35
  -2  -3  -1  145.75    4.95
  -2  -3  -1  146.15    4.08
  -2  -3  -1  152.29    3.94
  -2  -3  -1  149.54    5.00
   2   3   1  148.82    4.30
   2   3   1  142.41    4.07
   2   3   1  152.12    4.98
  -3  -3  -1    8.76    0.66
  -3  -3  -1    9.50    0.62
  -3  -3  -1    9.88    0.64
  -3  -3  -1   10.41    0.78
  -3  -3  -1   10.41    1.01
  -3  -3  -1    9.06    0.63
  -3  -3  -1    9.88    0.64
  -3  -3  -1    9.49    0.71
  -3  -3  -1   10.40    0.73
   3   3   1   11.07    0.74
   3   3   1   10.14    0.62
   3   3   1    9.69    0.60
   3   3   1    9.89    0.63
   3   3   1   10.30    0.83
  -4  -3  -1  317.65    8.08
  -4  -3  -1  317.88    8.67
  -4  -3  -1  308.61    8.04
  -4  -3  -1  303.18   10.04
  -4  -3  -1  306.52    8.93
  -4  -3  -1  304.79    8.89
  -4  -3  -1  308.28    8.35
   4   3   1  317.24    7.92
   4   3   1  309.14   10.16
  -5  -3  -1   11.47    1.21
  -5  -3  -1   12.06    0.90
  -5  -3  -1   13.20    0.83
  -5  -3  -1   12.92    0.81
  -5  -3  -1   13.59    0.91
  -5  -3  -1   11.73    0.90
   5   3   1   11.76    0.74
  -6  -3  -1   75.93    2.71
  -6  -3  -1   77.86    2.49
  -6  -3  -1   80.44    3.46
  -6  -3  -1   70.88    2.67
   6   3   1   81.08    2.40
  -7  -3  -1   24.81    1.43
  -7  -3  -1   27.42    2.13
  -7  -3  -1   27.04    1.52
   7   3   1   24.78    1.33
  -8  -3  -1    1.30    0.75
  -8  -3  -1    1.24    1.19
  -8  -3  -1    0.80    0.67
  -9  -3  -1   20.14    1.47
  -9  -3  -1   19.75    2.20
 -10   4   1   -0.37    1.13
  -9   4   1   -1.07    0.98
  -8   4   1    2.47    1.02
  -7   4   1   21.60    1.80
  -7   4   1   22.45    1.63
  -6   4   1   14.38    1.29
  -6   4   1   12.66    1.36
  -6   4   1   12.51    1.25
   5  -4  -1  180.41    5.63
  -5   4   1  175.64    4.93
  -5   4   1  179.40    6.62
  -5   4   1  176.45    4.93
  -5   4   1  170.01    4.78
  -5   4   1  182.09    6.08
  -5   4   1  159.99    5.91
   4  -4  -1    5.20    0.46
  -4   4   1    5.04    0.35
  -4   4   1    5.87    0.80
  -4   4   1    5.18    0.38
  -4   4   1    4.75    0.73
  -4   4   1    6.14    0.85
  -4   4   1    6.19    0.41
  -4   4   1    5.43    0.39
   3  -4  -1  182.25    4.82
   3  -4  -1  181.16    5.89
   3  -4  -1  170.68    4.81
  -3   4   1  181.77    5.14
  -3   4   1  188.56    4.81
  -3   4   1  182.15    5.93
  -3   4   1  185.15    4.80
  -3   4   1  183.84    5.00
  -3   4   1  176.20    5.17
  -3   4   1  177.62    4.64
  -3   4   1  182.73    6.53
   2  -4  -1  355.48   11.52
   2  -4  -1  361.18    9.46
   2  -4  -1  360.55    9.47
   2  -4  -1  356.69    8.98
  -2   4   1  377.33   11.23
  -2   4   1  357.93   10.14
  -2   4   1  368.28    9.83
  -2   4   1  352.69    9.44
  -2   4   1  364.36   10.07
  -2   4   1  361.43    9.16
  -2   4   1  364.32   12.45
  -2   4   1  359.73   11.40
   1  -4  -1   57.76    2.21
   1  -4  -1   62.13    1.84
   1  -4  -1   58.45    1.83
  -1   4   1   60.25    1.92
  -1   4   1   61.06    1.82
  -1   4   1   60.79    2.17
  -1   4   1   61.62    1.74
  -1   4   1   61.03    2.36
  -1   4   1   62.08    1.83
  -1   4   1   62.64    1.96
   0  -4  -1  462.85   12.66
   0  -4  -1  465.01   11.90
   0  -4  -1  445.72   14.49
   0  -4  -1  449.57   11.90
   0   4   1  450.01   11.89
   0   4   1  438.09   11.50
   0   4   1  441.02   11.87
   0   4   1  449.45   12.64
   0   4   1  475.15   12.75
   0   4   1  464.66   14.46
  -1  -4  -1   -0.12    0.36
  -1  -4  -1    0.41    0.29
  -1  -4  -1    0.54    0.34
  -1  -4  -1   -0.19    0.27
   1   4   1   -0.16    0.28
   1   4   1    0.07    0.30
   1   4   1    0.24    0.35
   1   4   1    0.26    0.27
  -2  -4  -1  270.61    7.73
  -2  -4  -1  256.37    8.76
  -2  -4  -1  267.14    7.22
  -2  -4  -1  263.45    7.68
  -2  -4  -1  274.17    7.25
   2   4   1  260.54    7.19
   2   4   1  274.49    7.22
   2   4   1  269.12    7.64
   2   4   1  271.74    8.79
  -3  -4  -1    1.44    0.52
  -3  -4  -1    0.77    0.74
  -3  -4  -1    0.97    0.49
  -3  -4  -1    2.46    0.49
  -3  -4  -1    2.46    0.46
  -3  -4  -1    1.47    0.42
   3   4   1    2.11    0.47
   3   4   1    2.21    0.55
   3   4   1    1.33    0.41
   3   4   1    1.82    0.45
  -4  -4  -1   47.73    1.84
  -4  -4  -1   48.60    1.89
  -4  -4  -1   46.56    2.37
  -5  -4  -1   21.00    1.26
  -5  -4  -1   19.38    1.62
  -5  -4  -1   19.56    1.24
  -6  -4  -1    3.89    0.75
  -6  -4  -1    2.94    0.75
  -6  -4  -1    3.01    1.08
  -7  -4  -1   14.49    1.24
  -7  -4  -1   18.21    1.35
  -7  -4  -1   17.01    1.81
  -8  -4  -1   24.62    1.61
  -8  -4  -1   20.80    2.15
  -8  -4  -1   21.82    1.53
  -9  -4  -1    1.18    1.31
  -9  -4  -1    1.01    0.83
 -10   5   1   -1.17    1.09
  -9   5   1   30.69    2.31
  -8   5   1   -0.23    0.96
  -7   5   1   60.44    2.97
  -7   5   1   64.50    3.31
  -6   5   1   22.92    1.79
  -6   5   1   22.68    1.67
  -6   5   1   19.78    1.51
  -6   5   1   20.73    0.80
   5  -5  -1   38.41    1.49
  -5   5   1   39.72    1.95
  -5   5   1   39.34    2.04
  -5   5   1   36.38    1.09
  -5   5   1   33.99    1.05
  -5   5   1   36.08    1.26
  -5   5   1   34.08    1.99
  -5   5   1   36.58    1.26
  -5   5   1   36.01    1.21
   4  -5  -1   54.02    1.99
   4  -5  -1   50.53    1.38
  -4   5   1   51.52    1.72
  -4   5   1   52.86    1.52
  -4   5   1   53.20    1.67
  -4   5   1   53.87    1.74
  -4   5   1   48.90    2.27
  -4   5   1   53.71    1.53
  -4   5   1   55.39    2.50
   3  -5  -1   21.23    0.87
   3  -5  -1   21.11    0.78
   3  -5  -1   22.58    1.09
   3  -5  -1   22.97    0.89
  -3   5   1   20.87    0.94
  -3   5   1   21.45    0.92
  -3   5   1   22.52    1.27
  -3   5   1   21.50    1.38
  -3   5   1   22.22    0.84
  -3   5   1   21.95    0.98
  -3   5   1   21.97    0.85
  -3   5   1   21.92    0.82
   2  -5  -1  103.82    2.94
   2  -5  -1  103.42    2.75
   2  -5  -1  101.58    3.58
   2  -5  -1  100.90    2.95
  -2   5   1  104.39    3.04
  -2   5   1  100.64    3.13
  -2   5   1  102.38    2.92
  -2   5   1  103.13    3.55
  -2   5   1  102.40    3.87
  -2   5   1  102.90    2.82
  -2   5   1  100.32    3.11
  -2   5   1  102.61    3.45
  -2   5   1  104.46    2.93
   1  -5  -1  248.14    7.22
   1  -5  -1  240.97    8.28
   1  -5  -1  255.83    6.82
   1  -5  -1  248.80    6.82
  -1   5   1  252.17    8.23
  -1   5   1  256.12    8.86
  -1   5   1  253.21    6.57
  -1   5   1  251.85    6.80
  -1   5   1  271.01    7.99
  -1   5   1  255.18    6.81
  -1   5   1  262.48    7.30
  -1   5   1  243.91    7.21
   0  -5  -1   67.20    2.64
   0  -5  -1   72.62    2.20
   0  -5  -1   73.19    2.35
   0  -5  -1   72.91    2.21
   0   5   1   69.56    2.31
   0   5   1   69.37    2.29
   0   5   1   70.75    2.61
   0   5   1   69.10    2.07
   0   5   1   71.44    2.17
   0   5   1   66.76    2.17
  -1  -5  -1   52.80    1.95
  -1  -5  -1   53.38    2.22
  -1  -5  -1   56.02    1.96
  -1  -5  -1   55.18    1.83
  -1  -5  -1   54.99    1.83
   1   5   1   55.77    2.21
   1   5   1   51.44    1.78
   1   5   1   54.21    1.91
   1   5   1   55.77    1.84
   1   5   1   54.35    1.93
  -2  -5  -1   35.82    1.71
  -2  -5  -1   38.08    1.57
  -2  -5  -1   36.72    1.56
  -2  -5  -1   37.30    1.44
  -2  -5  -1   36.24    1.46
   2   5   1   37.58    1.51
   2   5   1   38.10    1.74
   2   5   1   37.73    1.42
   2   5   1   40.09    1.46
  -3  -5  -1    1.12    0.48
  -3  -5  -1    0.39    0.52
  -3  -5  -1   -0.30    0.75
  -3  -5  -1   -0.15    0.41
  -3  -5  -1    0.21    0.44
   3   5   1    0.56    0.43
   3   5   1    1.17    0.58
   3   5   1    0.25    0.44
  -4  -5  -1   93.10    3.78
  -4  -5  -1   97.29    3.20
  -4  -5  -1   86.32    3.11
  -5  -5  -1    5.28    0.82
  -5  -5  -1    4.41    1.09
  -5  -5  -1    4.47    0.80
  -6  -5  -1   40.72    2.47
  -6  -5  -1   39.23    1.95
  -6  -5  -1   39.47    1.93
  -7  -5  -1   12.61    1.68
  -7  -5  -1   14.54    1.32
  -7  -5  -1   12.00    1.24
  -8  -5  -1    3.83    1.00
  -8  -5  -1    4.45    1.44
  -8  -5  -1    4.00    0.95
  -9  -5  -1    2.28    1.42
  -9  -5  -1    0.48    0.89
  -9  -5  -1    0.98    0.99
  -9   6   1    5.41    1.46
  -8   6   1    2.48    0.33
  -8   6   1    2.47    1.17
  -7   6   1    6.13    1.22
  -7   6   1    7.00    0.46
  -7   6   1    7.18    1.34
  -6   6   1    0.79    0.84
  -6   6   1    0.91    0.32
  -6   6   1   -1.48    0.76
  -6   6   1   -0.08    0.33
  -6   6   1    0.25    0.35
   5  -6  -1   80.52    2.15
  -5   6   1   76.60    2.48
  -5   6   1   84.67    3.42
  -5   6   1   80.14    2.24
  -5   6   1   80.11    2.43
  -5   6   1   75.60    3.24
  -5   6   1   78.88    3.48
   4  -6  -1    9.11    0.59
  -4   6   1   10.68    0.76
  -4   6   1    9.10    1.02
  -4   6   1    8.47    0.98
  -4   6   1    8.90    0.56
  -4   6   1    9.15    0.65
  -4   6   1    9.20    0.66
   3  -6  -1  108.16    3.75
   3  -6  -1  105.61    2.86
  -3   6   1  103.08    3.77
  -3   6   1   99.07    3.24
  -3   6   1  105.55    2.93
  -3   6   1  105.84    3.15
  -3   6   1  103.80    4.10
  -3   6   1  108.46    3.25
   2  -6  -1    3.42    0.42
   2  -6  -1    3.43    0.56
  -2   6   1    3.69    0.49
  -2   6   1    3.39    0.45
  -2   6   1    3.47    0.62
  -2   6   1    4.01    0.52
  -2   6   1    3.03    0.43
  -2   6   1    3.08    0.49
  -2   6   1    3.87    0.65
   1  -6  -1    9.47    0.71
   1  -6  -1    9.08    0.75
   1  -6  -1    8.78    0.83
   1  -6  -1    7.58    0.66
  -1   6   1    8.47    0.78
  -1   6   1    9.57    0.85
  -1   6   1    8.08    0.67
  -1   6   1    7.49    0.57
  -1   6   1   10.15    0.71
  -1   6   1    6.74    0.64
  -1   6   1    9.30    0.67
   0  -6  -1   -0.07    0.42
   0  -6  -1    0.25    0.39
   0  -6  -1    0.02    0.37
   0  -6  -1    0.19    0.47
   0   6   1    0.00    0.35
   0   6   1   -0.03    0.36
   0   6   1    0.01    0.39
   0   6   1    0.56    0.41
  -1  -6  -1   29.73    1.65
  -1  -6  -1   36.23    1.42
  -1  -6  -1   34.27    1.55
  -1  -6  -1   33.45    1.40
   1   6   1   32.45    1.49
   1   6   1   34.39    1.52
   1   6   1   32.83    1.35
   1   6   1   33.26    1.34
  -2  -6  -1   10.41    0.88
  -2  -6  -1    9.13    0.78
  -2  -6  -1    7.71    0.81
  -2  -6  -1    8.77    0.92
  -2  -6  -1    8.68    0.80
   2   6   1    9.12    0.76
   2   6   1    8.51    0.79
   2   6   1   10.04    0.79
  -3  -6  -1  147.63    5.35
  -3  -6  -1  139.41    4.52
  -3  -6  -1  142.76    4.55
   3   6   1  138.92    4.42
  -4  -6  -1    7.60    1.25
  -4  -6  -1    8.20    0.94
  -4  -6  -1   10.86    1.02
  -5  -6  -1   82.26    3.58
  -5  -6  -1   76.07    3.01
  -5  -6  -1   79.62    3.07
  -6  -6  -1   19.07    1.50
  -6  -6  -1   14.11    1.34
  -6  -6  -1   19.03    1.87
  -7  -6  -1   15.15    1.44
  -7  -6  -1   13.62    1.78
  -7  -6  -1   15.37    1.42
  -8  -6  -1   27.37    2.50
  -8  -6  -1   31.64    1.93
  -8  -6  -1   30.67    1.97
  -9   7   1   -1.21    1.14
   8  -7  -1    1.18    0.36
  -8   7   1    2.39    0.42
  -8   7   1    3.15    1.20
  -7   7   1    8.93    1.38
  -7   7   1    8.60    1.41
  -7   7   1    7.37    0.58
   6  -7  -1   26.97    1.04
  -6   7   1   25.97    1.16
  -6   7   1   31.31    2.12
  -6   7   1   25.18    1.89
  -6   7   1   29.86    1.11
  -6   7   1   25.99    1.15
   5  -7  -1    4.07    0.46
  -5   7   1    3.14    0.93
  -5   7   1    5.41    0.63
  -5   7   1    3.29    0.90
  -5   7   1    3.84    0.53
  -5   7   1    3.48    0.52
  -5   7   1    4.31    0.50
  -5   7   1    4.87    1.11
  -4   7   1   58.28    2.77
  -4   7   1   58.12    2.03
  -4   7   1   62.12    2.11
  -4   7   1   59.44    1.87
  -4   7   1   57.62    2.08
  -4   7   1   59.20    2.61
  -3   7   1   31.54    1.20
  -3   7   1   28.46    1.64
  -3   7   1   31.08    1.37
  -3   7   1   30.21    1.74
  -3   7   1   32.47    1.31
  -3   7   1   29.67    1.38
  -2   7   1   41.01    1.46
  -2   7   1   35.31    1.57
  -2   7   1   38.36    1.95
  -2   7   1   37.95    1.78
  -2   7   1   38.67    1.59
   1  -7  -1  164.25    5.85
   1  -7  -1  163.12    5.04
  -1   7   1  165.09    6.11
  -1   7   1  170.68    5.10
  -1   7   1  160.58    5.05
  -1   7   1  178.00    5.53
   0  -7  -1    9.99    0.83
   0  -7  -1   10.71    1.02
   0  -7  -1   12.92    0.98
   0   7   1   12.31    1.08
   0   7   1   11.01    0.82
   0   7   1    9.85    0.84
   0   7   1   10.94    0.87
  -1  -7  -1  225.34    6.91
  -1  -7  -1  235.89    6.54
  -1  -7  -1  227.09    7.93
   1   7   1  230.75    6.49
   1   7   1  234.10    6.88
  -2  -7  -1   13.66    1.21
  -2  -7  -1   11.74    1.05
   2   7   1   11.70    0.96
  -3  -7  -1   78.20    3.54
  -3  -7  -1   72.22    2.79
   3   7   1   76.42    2.78
  -4  -7  -1    8.42    1.03
  -4  -7  -1    9.54    1.47
  -4  -7  -1   10.03    1.10
  -5  -7  -1    1.60    0.80
  -5  -7  -1    2.16    1.15
  -5  -7  -1    1.70    0.83
  -6  -7  -1    2.75    0.94
  -6  -7  -1    3.59    1.02
  -6  -7  -1    2.49    1.24
  -7  -7  -1   10.73    1.72
  -7  -7  -1    8.41    1.27
  -7  -7  -1   10.65    1.38
  -8  -7  -1    1.27    1.36
  -8  -7  -1    2.98    1.06
  -8  -7  -1    5.70    1.18
  -8   8   1   24.38    2.23
   7  -8  -1    0.99    0.44
  -7   8   1    1.70    1.10
  -7   8   1    0.96    0.47
  -7   8   1    0.66    1.05
   6  -8  -1   27.66    1.17
  -6   8   1   26.11    2.09
  -6   8   1   28.13    1.89
  -6   8   1   24.36    1.21
  -6   8   1   26.82    1.20
   5  -8  -1    7.14    0.66
  -5   8   1    6.51    0.74
  -5   8   1    9.28    0.83
  -5   8   1    6.77    1.16
  -5   8   1    7.30    1.18
  -5   8   1    7.06    0.67
  -5   8   1    7.33    0.74
  -4   8   1   11.32    0.89
  -4   8   1   11.34    0.92
  -4   8   1   11.23    1.23
  -4   8   1    9.30    1.12
  -4   8   1   11.85    0.90
  -4   8   1   12.11    0.82
  -3   8   1   52.11    1.99
  -3   8   1   46.47    2.42
  -3   8   1   49.73    1.96
  -3   8   1   52.55    2.32
  -2   8   1    4.89    0.71
  -2   8   1    5.56    0.87
  -2   8   1    5.53    0.85
  -2   8   1    6.54    0.72
  -1   8   1   43.74    1.85
  -1   8   1   47.63    1.89
   0  -8  -1   29.26    1.49
   0   8   1   31.35    1.59
   0   8   1   28.88    1.55
  -1  -8  -1    1.53    0.63
   1   8   1    1.83    0.61
  -2  -8  -1    9.81    1.05
   2   8   1    9.73    1.00
  -3  -8  -1   24.51    1.68
  -3  -8  -1   29.35    2.35
   3   8   1   32.36    1.72
  -4  -8  -1   -0.08    1.06
  -4  -8  -1    0.15    0.70
  -5  -8  -1   24.14    1.76
  -5  -8  -1   23.79    2.20
  -6  -8  -1    1.26    0.92
  -6  -8  -1    2.07    0.99
  -6  -8  -1    0.52    1.19
  -7  -8  -1    7.45    1.27
  -7  -8  -1    4.29    1.53
  -7  -8  -1    7.21    1.34
  -8   9   1    0.14    1.16
  -7   9   1    1.48    1.13
  -7   9   1    1.41    0.54
  -7   9   1    0.80    0.56
  -6   9   1    8.76    1.35
  -6   9   1    5.30    0.71
  -6   9   1    5.77    0.73
  -5   9   1    3.88    1.08
  -5   9   1    4.29    0.74
  -5   9   1    3.55    0.69
  -4   9   1   38.49    1.77
  -4   9   1   40.76    2.17
  -4   9   1   39.99    1.80
  -3   9   1    0.03    0.60
  -3   9   1   -0.15    0.71
  -3   9   1   -0.02    0.53
  -2   9   1   35.80    1.82
  -2   9   1   35.25    1.73
  -2   9   1   33.60    1.74
  -1   9   1    2.09    0.70
  -1   9   1    0.95    0.66
   0  -9  -1    2.10    0.74
   0   9   1    0.30    0.67
   0   9   1    2.58    0.75
  -1  -9  -1    6.17    0.98
   1   9   1    3.77    0.85
  -2  -9  -1   34.37    1.87
   2   9   1   36.73    1.95
  -3  -9  -1    2.82    1.34
  -3  -9  -1    3.16    0.89
   3   9   1    2.97    0.84
  -4  -9  -1   51.58    2.57
  -4  -9  -1   54.19    3.11
  -5  -9  -1    4.73    1.08
  -5  -9  -1    4.67    1.44
  -6  -9  -1    8.69    1.35
  -6  -9  -1    9.60    1.71
  -7  -9  -1   11.96    1.59
  -7  -9  -1   17.97    2.12
  -7  10   1    5.91    0.74
  -7  10   1    5.04    1.40
  -6  10   1    6.52    1.32
  -6  10   1    5.17    0.77
  -5  10   1   15.43    1.23
  -5  10   1   13.69    1.54
  -5  10   1   12.66    1.09
  -4  10   1    0.62    0.68
  -4  10   1   -0.69    0.82
  -4  10   1    0.18    0.69
  -3  10   1    9.19    1.17
  -3  10   1    6.88    0.95
  -3  10   1    7.35    0.98
  -2  10   1   45.18    2.08
  -2  10   1   42.19    2.05
  -1  10   1    1.23    0.78
  -1  10   1    1.43    0.79
   0  10   1  105.77    3.79
  -1 -10  -1    2.34    0.85
   1  10   1    3.20    0.91
  -2 -10  -1   46.33    3.08
  -2 -10  -1   44.41    2.35
   2  10   1   49.64    2.29
  -3 -10  -1    2.89    1.05
  -3 -10  -1    1.37    1.36
   3  10   1    2.82    0.94
  -4 -10  -1    6.48    1.23
  -4 -10  -1    8.27    1.67
  -5 -10  -1    6.52    1.63
  -5 -10  -1    7.22    1.33
  -6 -10  -1    1.28    1.09
  -6  11   1    4.01    0.77
  -6  11   1    6.61    1.37
  -5  11   1    8.10    1.38
  -5  11   1    4.04    0.85
  -5  11   1    5.29    0.96
  -4  11   1   18.54    1.71
  -4  11   1   20.40    1.43
  -4  11   1   20.89    1.52
  -3  11   1    1.00    0.81
  -3  11   1    0.44    0.76
  -2  11   1   26.96    1.74
  -2  11   1   22.22    1.63
  -1  11   1    8.34    1.17
  -1  11   1    6.90    1.08
   0  11   1    4.38    0.99
  -1 -11  -1    1.82    0.92
   1  11   1    2.64    0.93
  -2 -11  -1    1.21    1.51
  -2 -11  -1    3.04    1.10
   2  11   1    3.48    1.04
  -3 -11  -1    0.48    1.00
   3  11   1   -0.26    0.99
  -4 -11  -1   17.50    1.78
  -5 -11  -1    0.16    1.09
  -5  12   1   12.29    1.29
  -5  12   1    7.29    1.05
  -4  12   1    0.95    0.87
  -4  12   1    0.61    0.79
  -3  12   1    8.71    1.22
  -3  12   1    6.69    1.15
  -2  12   1    0.22    0.82
  -2  12   1   -0.35    0.89
  -1  12   1    0.41    0.84
   0  12   1    2.39    1.00
   1  12   1    1.85    0.99
  -2 -12  -1    5.27    1.28
   2  12   1    5.72    1.27
  -3 -12  -1   11.57    1.58
   3  12   1    9.81    1.50
  -4 -12  -1   -0.16    1.06
  -4  13   1    4.25    1.05
  -4  13   1    3.43    1.06
  -3  13   1    2.08    0.98
  -3  13   1    1.12    0.95
  -2  13   1   -0.37    0.93
  -2  13   1    1.42    0.95
  -1  13   1   16.06    1.54
   0  13   1   -1.50    0.89
   1  13   1   22.02    1.90
   2  13   1    3.94    1.27
   0  14  -2   23.64    1.94
  -1  14  -2    2.77    1.07
   3  13  -2    0.80    1.11
  -3 -13   2   -0.52    1.07
   2  13  -2   16.46    1.72
   1  13  -2    0.70    1.03
   0  13  -2    1.56    1.03
  -1  13  -2   -0.15    0.90
  -2  13  -2    5.83    1.16
  -2  13  -2    4.47    1.17
  -3  13  -2    0.00    0.93
  -3  13  -2    1.02    0.97
  -4  13  -2   11.96    1.42
  -4  13  -2   11.83    1.32
  -4 -12   2    2.04    1.12
   3  12  -2   11.47    1.50
  -3 -12   2    9.00    1.42
   2  12  -2    5.20    1.21
  -2 -12   2    6.78    1.28
   1  12  -2    2.07    1.02
   0  12  -2   10.20    1.29
  -1  12  -2    2.42    0.94
  -2  12  -2    6.39    1.15
  -2  12  -2    5.86    1.07
  -3  12  -2   10.95    1.30
  -3  12  -2   12.77    1.36
  -4  12  -2   -0.10    0.80
  -4  12  -2    0.55    0.82
  -5  12  -2    7.55    1.15
  -5  12  -2    3.94    0.90
  -6 -11   2    0.06    1.07
  -5 -11   2    0.25    1.04
  -4 -11   2    4.23    1.11
   3  11  -2   17.68    1.63
  -3 -11   2   15.72    1.60
   2  11  -2    1.40    0.93
  -2 -11   2    0.67    0.85
   1  11  -2   64.47    2.82
  -1 -11   2   64.89    2.82
   0  11  -2    1.28    0.85
  -1  11  -2   42.43    2.23
  -1  11  -2   39.69    2.10
  -2  11  -2   16.50    1.90
  -2  11  -2   13.89    1.33
  -2  11  -2   14.81    1.37
  -3  11  -2    8.04    1.12
  -3  11  -2    9.24    1.58
  -3  11  -2    8.84    1.10
  -4  11  -2   18.47    1.41
  -4  11  -2   20.20    2.12
  -4  11  -2   18.32    1.46
  -5  11  -2   -0.11    0.95
  -5  11  -2   -0.18    0.76
  -5  11  -2   -0.14    1.18
  -5  11  -2    0.00    0.66
  -6  11  -2   15.13    1.13
  -6  11  -2   13.31    1.67
  -6 -10   2    4.83    1.16
  -5 -10   2   33.24    2.15
  -4 -10   2    1.57    0.96
   3  10  -2   51.54    2.40
  -3 -10   2   53.02    2.53
   2  10  -2    0.96    0.75
  -2 -10   2    0.65    0.80
   1  10  -2   18.49    1.47
  -1 -10   2   17.74    1.46
   0  10  -2    0.79    1.15
   0  10  -2   -0.43    0.63
  -1  10  -2   -0.07    1.05
  -1  10  -2    0.83    0.69
  -1  10  -2    1.39    0.70
  -2  10  -2    7.68    0.98
  -2  10  -2    5.68    0.96
  -2  10  -2    7.58    1.39
  -3  10  -2   25.96    2.24
  -3  10  -2   24.75    1.58
  -3  10  -2   25.13    1.59
  -4  10  -2    8.03    0.99
  -4  10  -2    8.63    1.50
  -4  10  -2    6.23    1.13
  -4  10  -2    5.35    0.89
  -5  10  -2   19.11    1.79
  -5  10  -2   22.45    2.19
  -5  10  -2   18.59    1.31
  -5  10  -2   22.45    1.47
  -6  10  -2    0.36    1.37
  -6  10  -2   -0.25    1.20
  -6  10  -2   -0.47    1.03
  -6  10  -2    1.34    0.64
  -7  10  -2    2.40    0.59
  -7  10  -2    3.60    1.27
  -7  10  -2    2.30    0.72
  -7  -9   2    8.40    1.40
  -7  -9   2    5.32    1.23
  -6  -9   2   17.37    1.66
  -5  -9   2    3.56    1.01
   4   9  -2   32.96    1.83
  -4  -9   2   36.92    2.05
   3   9  -2   -0.45    0.63
  -3  -9   2   -0.45    0.65
   2   9  -2    9.14    1.00
  -2  -9   2    9.86    1.12
   1   9  -2   15.85    1.28
  -1  -9   2   16.75    1.31
   0   9  -2    3.25    0.72
   0   9  -2    2.06    0.67
   0  -9   2    3.09    0.74
  -1   9  -2   44.37    2.74
  -1   9  -2   46.35    2.02
  -1   9  -2   39.31    1.94
  -2   9  -2    9.09    0.97
  -2   9  -2    9.41    1.37
  -2   9  -2   10.98    1.00
  -3   9  -2   16.79    1.40
  -3   9  -2   18.04    1.31
  -3   9  -2   21.24    1.85
  -3   9  -2   16.23    1.23
  -4   9  -2   10.32    0.99
  -4   9  -2   13.50    1.11
  -4   9  -2   10.50    1.25
  -4   9  -2   13.03    1.64
  -5   9  -2    1.71    0.95
  -5   9  -2   -0.34    1.00
  -5   9  -2    1.63    0.69
  -5   9  -2    0.24    0.57
  -5   9  -2    0.24    1.28
   5  -9   2    1.16    0.57
  -6   9  -2    3.74    1.15
  -6   9  -2    3.01    1.50
  -6   9  -2    2.59    1.30
  -6   9  -2    3.52    0.66
  -6   9  -2    2.90    0.61
  -6   9  -2    3.10    0.70
   6  -9   2    3.63    0.66
  -7   9  -2   19.57    1.03
  -7   9  -2   20.07    1.19
  -7   9  -2   17.28    1.89
  -7   9  -2   20.83    2.28
  -7   9  -2   19.85    1.22
   7  -9   2   21.03    1.15
  -8   9  -2    0.09    0.52
  -8   9  -2    0.75    1.25
   8  -9   2   -0.54    0.53
  -8  -8   2    7.77    1.29
  -8  -8   2    5.28    1.18
  -7  -8   2    6.72    1.22
  -7  -8   2    4.05    1.08
  -6  -8   2    9.56    1.27
  -6  -8   2   11.74    1.36
  -5  -8   2    4.67    1.03
  -5  -8   2    6.70    1.04
   4   8  -2    0.54    0.69
  -4  -8   2   -0.95    0.59
   3   8  -2    0.77    0.60
  -3  -8   2    1.84    0.70
   2   8  -2   88.05    3.06
  -2  -8   2   85.53    3.09
  -2  -8   2   85.46    3.54
   1   8  -2    0.32    0.49
   1   8  -2    0.89    0.56
  -1  -8   2    0.68    0.54
   0   8  -2  172.06    5.43
   0   8  -2  181.08    5.50
   0  -8   2  174.37    5.41
  -1   8  -2   14.00    1.04
  -1   8  -2   15.44    1.61
  -1   8  -2   14.38    1.05
  -2   8  -2  104.81    4.47
  -2   8  -2  103.37    3.64
  -2   8  -2   96.18    3.35
  -2   8  -2  101.50    3.38
  -3   8  -2   53.10    2.09
  -3   8  -2   53.94    1.82
  -3   8  -2   48.79    1.99
  -3   8  -2   53.16    2.89
  -3   8  -2   49.98    2.28
  -4   8  -2   16.99    1.43
  -4   8  -2   16.60    1.72
  -4   8  -2   14.25    1.08
  -4   8  -2   18.60    1.23
  -4   8  -2   19.65    1.14
  -4   8  -2   18.12    1.00
  -5   8  -2   52.96    3.33
  -5   8  -2   53.39    2.12
  -5   8  -2   60.49    2.23
  -5   8  -2   60.98    2.16
  -5   8  -2   58.77    3.27
  -5   8  -2   55.90    2.67
  -5   8  -2   60.42    1.97
   5  -8   2   60.25    1.97
  -6   8  -2    0.06    0.54
  -6   8  -2    0.47    0.48
  -6   8  -2   -0.06    1.04
  -6   8  -2    0.19    1.25
  -6   8  -2   -0.01    0.45
  -6   8  -2   -0.49    0.90
   6  -8   2    0.02    0.47
  -7   8  -2   17.44    2.19
  -7   8  -2   18.14    0.85
  -7   8  -2   17.02    1.02
  -7   8  -2   16.47    2.04
  -7   8  -2   18.15    1.09
  -7   8  -2   13.15    1.68
   7  -8   2   15.94    1.01
   7  -8   2   17.21    0.99
  -8   8  -2    1.90    0.54
  -8   8  -2    0.39    1.16
   8  -8   2    2.54    0.57
   8  -8   2    2.32    0.56
  -8  -7   2    0.60    0.88
  -8  -7   2    0.55    0.93
  -7  -7   2   17.23    1.52
  -7  -7   2   18.87    1.77
  -7  -7   2   17.91    1.56
  -6  -7   2   55.72    2.61
  -6  -7   2   48.09    2.35
  -6  -7   2   51.06    2.43
  -5  -7   2   14.31    1.34
  -5  -7   2   11.95    1.18
  -5  -7   2    9.81    1.14
   4   7  -2  128.28    4.11
  -4  -7   2  128.28    4.56
  -4  -7   2  124.19    4.27
  -4  -7   2  121.83    4.20
   3   7  -2    5.66    0.77
  -3  -7   2    6.62    0.85
  -3  -7   2    6.51    0.89
  -3  -7   2    8.34    0.90
   2   7  -2  130.88    4.21
   2   7  -2  136.13    4.04
  -2  -7   2  132.85    4.05
  -2  -7   2  135.98    4.64
  -2  -7   2  132.66    4.25
  -2  -7   2  129.16    4.85
   1   7  -2    0.02    0.46
   1   7  -2    0.61    0.49
   1   7  -2    0.30    0.46
   1   7  -2    0.16    0.42
  -1  -7   2   -0.21    0.51
  -1  -7   2    0.04    0.41
  -1  -7   2   -0.16    0.50
   0   7  -2   34.61    1.60
   0   7  -2   38.32    1.64
   0   7  -2   36.26    1.46
   0  -7   2   38.55    1.83
   0  -7   2   37.65    1.55
   0  -7   2   33.75    1.77
  -1   7  -2   11.47    0.91
  -1   7  -2   13.87    1.00
  -1   7  -2    9.80    0.86
  -1   7  -2   10.46    1.36
   1  -7   2   10.45    0.85
   1  -7   2   12.49    1.02
   1  -7   2   12.33    1.01
  -2   7  -2   49.90    1.70
  -2   7  -2   51.14    1.91
  -2   7  -2   55.36    2.82
  -2   7  -2   52.98    2.13
  -2   7  -2   51.38    1.96
  -3   7  -2   21.66    1.37
  -3   7  -2   19.13    1.10
  -3   7  -2   23.21    1.16
  -3   7  -2   20.83    1.21
  -3   7  -2   23.34    1.86
  -3   7  -2   22.32    1.01
   3  -7   2   23.88    1.04
  -4   7  -2   73.89    3.09
  -4   7  -2   71.53    2.56
  -4   7  -2   78.94    2.56
  -4   7  -2   79.68    2.62
  -4   7  -2   80.57    3.72
  -4   7  -2   79.67    2.32
   4  -7   2   75.75    2.30
  -5   7  -2    1.09    0.55
  -5   7  -2    0.32    1.10
  -5   7  -2    0.63    0.46
  -5   7  -2    0.71    0.86
  -5   7  -2    0.78    0.40
  -5   7  -2    1.08    0.48
  -5   7  -2    2.40    0.88
   5  -7   2    0.95    0.43
  -6   7  -2   13.15    0.84
  -6   7  -2   13.07    0.78
  -6   7  -2   14.52    1.77
  -6   7  -2   10.25    0.82
  -6   7  -2   10.37    1.71
  -6   7  -2   12.14    1.41
  -6   7  -2   11.22    0.79
   6  -7   2   12.21    0.77
  -7   7  -2    1.65    0.52
  -7   7  -2    1.04    0.51
  -7   7  -2    1.78    1.19
  -7   7  -2    1.05    1.30
  -7   7  -2    1.36    0.45
  -7   7  -2    0.68    1.04
   7  -7   2    1.43    0.48
   7  -7   2    1.76    0.43
  -8   7  -2   -0.15    0.42
  -8   7  -2    0.46    1.12
  -8   7  -2    0.43    0.41
  -8   7  -2    1.60    1.34
  -8   7  -2   -1.03    1.23
   8  -7   2   -0.16    0.45
   8  -7   2    0.56    0.43
  -9   7  -2    2.22    1.49
   9  -7   2    3.53    0.56
   9  -7   2    3.18    0.50
  -9  -6   2    1.49    0.93
  -9  -6   2    1.81    0.91
  -8  -6   2    6.52    1.33
  -8  -6   2    5.26    1.05
  -8  -6   2    5.65    1.06
  -7  -6   2    0.67    0.74
  -7  -6   2    1.66    0.81
  -7  -6   2    1.59    0.99
  -6  -6   2   27.42    1.85
  -6  -6   2   30.33    1.70
  -6  -6   2   26.77    1.63
  -5  -6   2   15.78    1.27
  -5  -6   2   19.13    1.45
  -5  -6   2   18.81    1.32
   4   6  -2   10.26    0.88
  -4  -6   2   10.94    0.97
  -4  -6   2   11.48    1.08
  -4  -6   2    9.74    0.95
   3   6  -2   31.11    1.46
   3   6  -2   31.22    1.35
  -3  -6   2   29.73    1.42
  -3  -6   2   28.30    1.52
  -3  -6   2   30.41    1.36
  -3  -6   2   30.00    1.61
  -3  -6   2   30.62    1.56
   2   6  -2  109.94    3.42
   2   6  -2  117.59    3.61
   2   6  -2  113.79    3.43
  -2  -6   2  115.67    3.46
  -2  -6   2  118.71    3.97
  -2  -6   2  109.41    4.13
  -2  -6   2  111.08    3.65
  -2  -6   2  114.55    3.70
   1   6  -2    2.51    0.49
   1   6  -2    2.79    0.53
   1   6  -2    2.80    0.53
   1   6  -2    3.29    0.51
  -1  -6   2    2.61    0.59
  -1  -6   2    3.16    0.51
  -1  -6   2    2.74    0.54
  -1  -6   2    2.44    0.64
   0   6  -2  228.56    6.37
   0   6  -2  238.81    6.84
   0   6  -2  228.87    6.78
   0   6  -2  228.62    6.37
   0  -6   2  235.60    6.78
   0  -6   2  239.21    7.79
   0  -6   2  227.33    6.39
   0  -6   2  232.79    7.78
  -1   6  -2    5.79    1.11
  -1   6  -2    6.67    0.60
  -1   6  -2    5.92    0.56
  -1   6  -2    6.16    0.63
  -1   6  -2    5.86    0.51
  -1   6  -2    6.82    0.68
  -1   6  -2    6.42    0.65
   1  -6   2    7.08    0.64
   1  -6   2    6.13    0.70
   1  -6   2    5.95    0.57
   1  -6   2    6.93    0.75
   1  -6   2    6.82    0.55
  -2   6  -2   45.97    1.70
  -2   6  -2   46.06    1.70
  -2   6  -2   48.05    1.90
  -2   6  -2   45.45    1.49
  -2   6  -2   46.79    2.51
  -2   6  -2   45.36    1.55
  -2   6  -2   44.39    1.55
   2  -6   2   42.55    1.88
   2  -6   2   44.60    1.91
   2  -6   2   47.07    1.51
  -3   6  -2   38.69    1.28
  -3   6  -2   35.80    1.75
  -3   6  -2   36.98    2.14
  -3   6  -2   36.66    1.42
  -3   6  -2   35.81    1.45
  -3   6  -2   37.22    1.49
   3  -6   2   39.40    1.29
   3  -6   2   37.86    1.66
  -4   6  -2    0.16    0.59
  -4   6  -2    0.08    0.40
  -4   6  -2    0.15    0.39
  -4   6  -2    0.08    0.37
  -4   6  -2    0.94    0.74
  -4   6  -2    0.56    0.38
  -4   6  -2    0.66    0.31
   4  -6   2    0.18    0.34
  -5   6  -2    3.26    1.05
  -5   6  -2    3.65    1.11
  -5   6  -2    3.57    0.84
  -5   6  -2    4.17    0.53
  -5   6  -2    2.98    0.49
  -5   6  -2    2.93    0.39
  -5   6  -2    2.50    0.47
   5  -6   2    3.46    0.44
  -6   6  -2   38.19    2.16
  -6   6  -2   38.65    1.38
  -6   6  -2   38.84    1.47
  -6   6  -2   38.90    1.28
  -6   6  -2   37.88    1.39
  -6   6  -2   36.62    2.65
  -6   6  -2   39.76    2.52
  -7   6  -2    2.94    0.52
  -7   6  -2    2.33    0.41
  -7   6  -2    2.90    0.53
  -7   6  -2    3.02    1.28
  -7   6  -2    2.42    1.20
  -7   6  -2    1.23    1.04
  -8   6  -2   44.87    3.12
  -8   6  -2   41.73    1.50
  -8   6  -2   44.14    1.43
  -8   6  -2   41.39    2.62
  -8   6  -2   49.33    3.18
  -8   6  -2   41.36    1.50
   8  -6   2   39.39    1.46
   8  -6   2   40.13    1.34
  -9   6  -2   -0.78    1.21
   9  -6   2    0.42    0.39
  -9  -5   2    6.92    1.06
  -9  -5   2    7.70    1.49
  -8  -5   2    0.10    0.72
  -8  -5   2   -0.83    0.74
  -8  -5   2   -0.46    1.01
  -7  -5   2   36.89    1.89
  -7  -5   2   40.95    1.97
  -7  -5   2   40.04    2.36
  -6  -5   2    0.45    0.63
  -6  -5   2   -0.19    0.60
  -6  -5   2    0.54    0.77
  -5  -5   2    8.45    1.02
  -5  -5   2    8.19    0.87
  -5  -5   2    8.36    0.88
  -4  -5   2    5.99    0.74
  -4  -5   2    5.92    0.74
  -4  -5   2    5.76    0.80
   3   5  -2   99.12    3.67
   3   5  -2   97.35    3.17
   3   5  -2  103.24    3.06
   3   5  -2  102.53    3.05
  -3  -5   2  103.76    3.52
  -3  -5   2   97.42    3.04
  -3  -5   2  100.01    3.26
  -3  -5   2   95.65    3.21
  -3  -5   2   99.26    3.65
   2   5  -2    1.93    0.53
   2   5  -2    1.91    0.43
   2   5  -2    1.48    0.42
   2   5  -2    1.68    0.49
  -2  -5   2    2.08    0.57
  -2  -5   2    1.83    0.47
  -2  -5   2    2.83    0.52
  -2  -5   2    2.43    0.53
  -2  -5   2    1.74    0.44
  -2  -5   2    2.04    0.54
   1   5  -2  384.98   10.50
   1   5  -2  409.63   12.81
   1   5  -2  402.00   11.18
   1   5  -2  384.02   10.50
   1   5  -2  404.73   11.26
  -1  -5   2  404.67   10.54
  -1  -5   2  404.75   12.80
  -1  -5   2  399.39   11.18
  -1  -5   2  373.39   12.79
   0   5  -2   10.46    0.58
   0   5  -2    9.68    0.63
   0   5  -2   10.14    0.65
   0   5  -2   10.19    0.75
   0   5  -2   10.64    0.72
   0   5  -2   10.13    0.73
   0  -5   2    9.26    0.67
   0  -5   2   10.25    0.76
   0  -5   2   10.78    0.63
   0  -5   2    9.52    0.78
  -1   5  -2  305.51    8.47
  -1   5  -2  293.70    7.90
  -1   5  -2  293.83    7.62
  -1   5  -2  295.64    8.41
  -1   5  -2  291.76    9.57
  -1   5  -2  301.60    7.90
   1  -5   2  306.33    9.63
   1  -5   2  294.75    8.37
   1  -5   2  281.50    9.61
   1  -5   2  297.36    7.50
   1  -5   2  298.18    7.91
  -2   5  -2  152.69    4.88
  -2   5  -2  149.90    3.92
  -2   5  -2  144.07    4.09
  -2   5  -2  147.31    4.09
  -2   5  -2  149.72    5.70
  -2   5  -2  145.03    3.97
  -2   5  -2  143.03    4.38
  -2   5  -2  151.29    4.26
   2  -5   2  143.59    4.09
   2  -5   2  146.83    5.00
   2  -5   2  149.64    3.89
   2  -5   2  154.20    5.01
  -3   5  -2   26.56    1.00
  -3   5  -2   24.89    1.36
  -3   5  -2   26.64    1.01
  -3   5  -2   27.09    1.14
  -3   5  -2   27.11    0.97
  -3   5  -2   25.13    1.09
  -3   5  -2   27.05    0.93
  -3   5  -2   25.68    1.80
   3  -5   2   26.90    1.00
   3  -5   2   27.07    1.25
   3  -5   2   26.80    0.99
  -4   5  -2  176.51    5.37
  -4   5  -2  191.76    5.38
  -4   5  -2  176.74    6.19
  -4   5  -2  185.76    7.11
  -4   5  -2  179.29    6.67
  -4   5  -2  187.81    4.80
  -4   5  -2  189.32    4.90
  -4   5  -2  192.50    5.02
   4  -5   2  182.86    4.75
   4  -5   2  190.42    6.14
  -5   5  -2    0.23    0.33
  -5   5  -2   -0.36    0.35
  -5   5  -2    0.39    0.73
  -5   5  -2    0.50    0.85
  -5   5  -2   -0.07    0.23
  -5   5  -2   -0.21    0.63
  -6   5  -2   76.21    3.63
  -6   5  -2   72.43    2.00
  -6   5  -2   68.01    3.52
  -6   5  -2   70.21    3.14
  -6   5  -2   72.83    2.22
  -6   5  -2   71.97    2.12
  -7   5  -2    0.84    1.00
  -7   5  -2    0.21    0.29
  -7   5  -2    0.51    0.96
  -7   5  -2   -0.35    0.42
  -7   5  -2    0.65    1.25
  -8   5  -2   18.10    0.95
  -8   5  -2   16.97    1.81
  -8   5  -2   17.47    2.18
  -8   5  -2   16.35    0.79
  -8   5  -2   21.53    2.17
   8  -5   2   17.41    0.71
  -9   5  -2    0.04    1.32
  -9   5  -2    0.20    1.19
   9  -5   2    0.45    0.35
  -9  -4   2   -0.86    0.63
  -9  -4   2   -1.08    1.05
  -8  -4   2   20.97    1.43
  -8  -4   2   21.59    1.90
  -8  -4   2   17.77    1.33
  -7  -4   2   30.02    1.98
  -7  -4   2   27.05    1.53
  -7  -4   2   30.53    1.59
   6   4  -2    6.04    0.64
  -6  -4   2    5.88    0.79
  -6  -4   2    6.71    0.79
  -6  -4   2    7.22    1.05
   5   4  -2  157.75    4.26
  -5  -4   2  155.54    4.83
  -5  -4   2  161.04    4.88
  -5  -4   2  155.36    5.41
   4   4  -2   15.64    0.80
   4   4  -2   16.21    1.07
  -4  -4   2   13.42    0.96
  -4  -4   2   14.51    0.81
  -4  -4   2   14.92    0.91
  -4  -4   2   14.15    1.06
   3   4  -2  457.95   12.81
   3   4  -2  456.50   14.70
   3   4  -2  455.77   12.07
   3   4  -2  467.59   12.10
   3   4  -2  449.46   11.49
  -3  -4   2  464.82   14.17
  -3  -4   2  441.32   14.66
  -3  -4   2  444.99   12.85
  -3  -4   2  469.45   12.11
  -3  -4   2  467.20   11.70
  -3  -4   2  462.83   12.96
   2   4  -2   14.64    0.74
   2   4  -2   14.13    0.89
   2   4  -2   15.68    0.75
   2   4  -2   14.82    0.86
  -2  -4   2   14.19    0.87
  -2  -4   2   16.09    0.91
  -2  -4   2   13.68    0.88
  -2  -4   2   14.20    0.75
  -2  -4   2   15.80    0.89
   1   4  -2  384.34   10.25
   1   4  -2  386.01   10.24
   1   4  -2  396.93   10.90
   1   4  -2  385.99   12.47
  -1  -4   2  382.74   12.48
  -1  -4   2  396.81   12.48
  -1  -4   2  394.78   10.91
  -1  -4   2  385.44   10.25
   0   4  -2   27.03    0.98
   0   4  -2   25.84    0.90
   0   4  -2   25.98    1.17
   0   4  -2   24.87    0.97
   0   4  -2   27.16    1.06
   0   4  -2   27.23    1.06
   0  -4   2   26.74    1.09
   0  -4   2   27.07    1.19
   0  -4   2   26.31    0.98
   0  -4   2   25.96    1.17
  -1   4  -2    3.31    0.35
  -1   4  -2    3.64    0.31
  -1   4  -2    2.72    0.41
  -1   4  -2    3.52    0.38
  -1   4  -2    3.72    0.38
  -1   4  -2    3.19    0.38
   1  -4   2    3.03    0.33
   1  -4   2    3.15    0.43
   1  -4   2    3.03    0.42
   1  -4   2    3.69    0.30
  -2   4  -2   57.05    1.89
  -2   4  -2   58.28    2.66
  -2   4  -2   58.49    1.89
  -2   4  -2   59.70    2.18
  -2   4  -2   57.94    1.71
  -2   4  -2   56.42    1.75
  -2   4  -2   58.09    1.64
   2  -4   2   61.32    2.15
   2  -4   2   58.40    1.67
   2  -4   2   60.26    1.76
   2  -4   2   59.56    2.15
  -3   4  -2   97.45    3.07
  -3   4  -2  101.18    2.80
  -3   4  -2  106.10    2.85
  -3   4  -2  104.79    4.16
  -3   4  -2  110.09    3.11
  -3   4  -2  100.21    2.71
  -3   4  -2  104.04    3.59
  -3   4  -2  103.97    2.89
   3  -4   2  105.13    3.51
   3  -4   2   99.49    2.66
   3  -4   2  103.22    3.51
   3  -4   2  101.76    2.85
  -4   4  -2   25.03    0.89
  -4   4  -2   27.60    1.06
  -4   4  -2   27.39    1.03
  -4   4  -2   26.85    1.74
  -4   4  -2   26.09    1.44
  -4   4  -2   27.06    0.93
  -4   4  -2   26.41    0.82
  -4   4  -2   28.18    1.81
  -4   4  -2   27.84    1.07
  -4   4  -2   26.55    0.84
   4  -4   2   26.66    0.88
   4  -4   2   28.53    1.20
  -5   4  -2   63.77    2.62
  -5   4  -2   59.06    1.95
  -5   4  -2   58.09    2.89
  -5   4  -2   59.72    1.68
  -5   4  -2   62.14    3.09
  -5   4  -2   66.41    2.06
  -5   4  -2   59.69    1.66
   5  -4   2   67.85    2.29
  -6   4  -2    0.80    0.22
  -6   4  -2    0.53    0.78
  -6   4  -2    0.78    0.30
  -6   4  -2    0.74    1.00
  -6   4  -2    0.91    0.86
  -6   4  -2    0.54    0.25
  -6   4  -2    0.89    0.38
  -7   4  -2    8.23    1.39
  -7   4  -2    6.68    0.47
  -7   4  -2    5.48    1.18
  -7   4  -2    7.01    1.44
  -7   4  -2    6.29    0.43
  -8   4  -2   11.45    0.69
  -8   4  -2   12.27    0.74
  -8   4  -2   11.24    1.56
  -8   4  -2   15.17    1.91
  -8   4  -2   10.51    1.75
  -9   4  -2   -1.25    1.14
  -9   4  -2    0.87    0.53
  -9   4  -2    0.34    0.51
  -9   4  -2    2.57    1.37
   9  -4   2    0.32    0.37
 -10  -3   2    8.46    0.95
  -9  -3   2   10.30    0.97
   8   3  -2    3.98    0.66
  -8  -3   2    3.97    0.73
  -8  -3   2    5.09    1.17
  -8  -3   2    3.63    0.71
   7   3  -2   51.88    1.77
  -7  -3   2   54.31    2.01
  -7  -3   2   53.66    2.06
  -7  -3   2   46.90    1.99
  -7  -3   2   50.53    2.58
   6   3  -2   41.64    1.47
   6   3  -2   41.39    1.44
  -6  -3   2   41.31    1.70
  -6  -3   2   45.95    2.20
  -6  -3   2   43.75    1.68
  -6  -3   2   40.77    1.49
  -6  -3   2   42.33    1.73
   5   3  -2   62.51    1.87
   5   3  -2   62.51    1.90
  -5  -3   2   63.40    2.12
  -5  -3   2   62.52    2.56
  -5  -3   2   63.93    1.94
  -5  -3   2   62.03    2.19
  -5  -3   2   62.67    2.19
   4   3  -2  139.07    3.90
   4   3  -2  133.96    3.87
   4   3  -2  140.04    4.74
   4   3  -2  138.16    3.67
   4   3  -2  134.11    3.63
  -4  -3   2  139.36    4.67
  -4  -3   2  134.32    4.17
  -4  -3   2  137.73    3.73
  -4  -3   2  138.38    4.61
  -4  -3   2  140.77    4.60
  -4  -3   2  139.24    4.03
  -4  -3   2  135.91    4.14
  -4  -3   2  140.34    3.90
   3   3  -2    3.07    0.39
   3   3  -2    3.10    0.36
   3   3  -2    3.44    0.41
   3   3  -2    3.29    0.48
   3   3  -2    2.81    0.46
   3   3  -2    3.42    0.35
  -3  -3   2    4.05    0.38
  -3  -3   2    4.13    0.49
  -3  -3   2    3.21    0.45
  -3  -3   2    3.64    0.52
  -3  -3   2    3.09    0.42
  -3  -3   2    3.80    0.41
   2   3  -2    1.05    0.28
   2   3  -2    1.41    0.30
   2   3  -2    1.88    0.38
   2   3  -2    1.54    0.36
  -2  -3   2    1.72    0.33
  -2  -3   2    1.59    0.31
  -2  -3   2    2.08    0.29
  -2  -3   2    1.50    0.37
  -2  -3   2    1.50    0.34
  -2  -3   2    2.93    0.40
   1   3  -2   72.80    2.62
   1   3  -2   73.54    2.17
   1   3  -2   74.84    2.64
   1   3  -2   75.21    2.18
  -1  -3   2   76.77    2.63
  -1  -3   2   74.23    2.17
  -1  -3   2   75.81    2.31
  -1  -3   2   75.04    2.63
   0   3  -2    0.15    0.23
   0   3  -2    0.47    0.21
   0   3  -2    2.14    0.34
   0   3  -2   -0.08    0.22
   0   3  -2   -0.01    0.26
   0   3  -2    0.62    0.25
   0  -3   2    0.27    0.29
   0  -3   2    0.35    0.29
   0  -3   2    0.15    0.21
  -1   3  -2  223.25    5.71
  -1   3  -2  220.48    7.14
  -1   3  -2  226.41    6.27
  -1   3  -2  220.94    5.87
  -1   3  -2  204.59    7.92
  -1   3  -2  227.63    5.66
  -1   3  -2  230.62    6.31
   1  -3   2  228.19    7.15
   1  -3   2  227.11    5.56
   1  -3   2  215.95    5.87
   1  -3   2  213.49    7.15
  -2   3  -2   12.12    0.47
  -2   3  -2   12.66    0.63
  -2   3  -2   11.97    0.57
  -2   3  -2   11.89    0.59
  -2   3  -2   12.11    0.54
  -2   3  -2   11.53    1.02
   2  -3   2   12.10    0.66
   2  -3   2   11.38    0.68
   2  -3   2   11.92    0.53
   2  -3   2   11.84    0.51
  -3   3  -2  191.70    6.74
  -3   3  -2  201.48    6.42
  -3   3  -2  198.08    7.26
  -3   3  -2  206.51    5.25
  -3   3  -2  205.53    5.65
  -3   3  -2  201.66    5.30
  -3   3  -2  189.46    5.66
  -3   3  -2  191.69    5.03
  -3   3  -2  197.25    5.02
   3  -3   2  200.39    5.25
   3  -3   2  203.57    6.46
   3  -3   2  199.66    6.42
  -4   3  -2   15.47    0.80
  -4   3  -2   14.38    1.28
  -4   3  -2   12.42    1.01
  -4   3  -2   14.15    0.50
  -4   3  -2   13.48    0.76
  -4   3  -2   14.62    0.52
  -4   3  -2   14.17    1.13
  -4   3  -2   12.94    1.23
  -4   3  -2   12.81    0.72
   4  -3   2   13.22    0.76
   4  -3   2   14.10    0.54
  -5   3  -2    4.27    1.00
  -5   3  -2    3.90    0.42
  -5   3  -2    4.98    0.81
  -5   3  -2    4.46    0.48
  -5   3  -2    3.71    0.87
  -6   3  -2    0.27    0.67
  -6   3  -2    0.25    0.31
  -6   3  -2    0.08    0.87
  -6   3  -2   -0.10    0.73
  -6   3  -2    0.35    0.19
  -6   3  -2    0.39    0.32
  -7   3  -2   56.63    3.18
  -7   3  -2   59.97    3.10
  -7   3  -2   53.37    1.59
  -7   3  -2   55.89    2.64
  -7   3  -2   52.32    1.56
  -8   3  -2   -1.96    1.08
  -8   3  -2    0.58    0.44
  -8   3  -2    0.96    0.36
  -8   3  -2    0.75    1.04
   8  -3   2    0.11    0.28
  -9   3  -2   27.17    1.27
  -9   3  -2   27.34    1.14
  -9   3  -2   32.81    2.68
   9  -3   2   26.56    1.12
  10  -3   2    0.61    0.53
   9   2  -2    1.42    0.57
  -9  -2   2    1.57    0.60
  -9  -2   2    2.82    0.66
   8   2  -2   32.46    1.33
   8   2  -2   34.06    1.34
  -8  -2   2   32.59    1.51
  -8  -2   2   34.77    2.26
  -8  -2   2   33.35    1.50
  -8  -2   2   37.14    1.45
   7   2  -2    8.30    0.62
   7   2  -2    7.71    0.64
  -7  -2   2    8.84    0.81
  -7  -2   2    9.99    0.79
  -7  -2   2    8.26    0.76
  -7  -2   2    8.57    1.22
  -7  -2   2    9.23    0.69
   6   2  -2   17.26    0.76
   6   2  -2   15.13    0.80
  -6  -2   2   15.55    1.32
  -6  -2   2   15.48    0.80
  -6  -2   2   16.28    1.00
  -6  -2   2   15.85    0.93
  -6  -2   2   14.41    0.90
   5   2  -2    0.35    0.27
   5   2  -2    0.68    0.30
  -5  -2   2    0.84    0.37
  -5  -2   2    0.90    0.36
  -5  -2   2    0.31    0.37
  -5  -2   2    0.30    0.57
  -5  -2   2    0.25    0.30
   4   2  -2   -0.17    0.26
   4   2  -2    0.05    0.26
   4   2  -2    0.48    0.37
   4   2  -2   -0.36    0.26
   4   2  -2    0.15    0.36
   4   2  -2    0.16    0.23
  -4  -2   2    0.34    0.23
  -4  -2   2   -0.31    0.29
  -4  -2   2   -0.24    0.25
  -4  -2   2    0.05    0.27
  -4  -2   2    0.02    0.34
  -4  -2   2   -0.06    0.17
  -4  -2   2   -0.17    0.44
  -4  -2   2    0.04    0.32
   3   2  -2   63.42    1.76
   3   2  -2   63.91    2.30
   3   2  -2   64.20    1.74
   3   2  -2   65.18    1.90
   3   2  -2   60.65    2.29
   3   2  -2   64.78    1.89
  -3  -2   2   64.11    2.03
  -3  -2   2   62.19    1.79
  -3  -2   2   66.35    2.30
  -3  -2   2   63.76    2.02
  -3  -2   2   66.13    2.25
  -3  -2   2   65.23    1.89
   2   2  -2  108.55    3.81
   2   2  -2  106.95    3.12
   2   2  -2  114.42    3.14
   2   2  -2  117.31    3.82
   2   2  -2  116.93    2.95
  -2  -2   2  118.36    3.80
  -2  -2   2  113.23    3.00
  -2  -2   2  114.54    3.36
  -2  -2   2  113.69    3.33
  -2  -2   2  114.19    3.78
  -2  -2   2  116.20    3.14
   1   2  -2  260.71    8.26
   1   2  -2  245.27    8.25
  -1  -2   2  261.93    8.26
  -1  -2   2  265.31    6.79
   0   2  -2  681.98   22.01
   0   2  -2  703.66   18.06
   0   2  -2  681.11   22.01
   0  -2   2  736.91   22.02
   0  -2   2  708.55   18.07
   0  -2   2  695.71   22.28
  -1   2  -2  126.02    4.07
  -1   2  -2  119.89    3.29
  -1   2  -2  125.97    3.38
  -1   2  -2  128.39    3.23
   1  -2   2  122.23    3.36
   1  -2   2  124.53    4.12
   1  -2   2  126.94    3.16
   1  -2   2  129.74    4.10
  -2   2  -2  229.40    6.16
  -2   2  -2  230.42    5.90
  -2   2  -2  230.06    5.89
  -2   2  -2  238.82    8.26
   2  -2   2  244.75    7.47
   2  -2   2  230.87    6.13
  -3   2  -2  458.40   15.31
  -3   2  -2  481.33   16.65
  -3   2  -2  487.89   13.36
  -3   2  -2  490.67   12.48
  -3   2  -2  485.06   14.84
  -3   2  -2  491.32   14.91
   3  -2   2  485.49   15.20
   3  -2   2  475.57   12.45
  -4   2  -2   60.67    1.93
  -4   2  -2   58.26    1.92
  -4   2  -2   59.52    2.74
  -4   2  -2   51.28    2.52
  -4   2  -2   57.89    2.35
  -4   2  -2   60.45    2.43
  -4   2  -2   60.16    1.62
   4  -2   2   59.46    2.13
   4  -2   2   56.26    1.65
   4  -2   2   59.84    1.65
  -5   2  -2  211.77    7.22
  -5   2  -2  210.95    8.04
  -5   2  -2  221.98    6.15
  -5   2  -2  212.59    7.11
  -5   2  -2  222.62    6.18
  -5   2  -2  207.57    7.44
  -6   2  -2    1.09    0.26
  -6   2  -2    1.80    0.35
  -6   2  -2    3.15    0.88
  -6   2  -2    1.08    0.24
  -6   2  -2    0.82    0.74
  -6   2  -2    0.98    0.83
  -6   2  -2    1.92    0.93
  -7   2  -2   61.58    3.14
  -7   2  -2   64.03    1.88
  -7   2  -2   60.33    2.89
  -7   2  -2   60.53    1.79
  -7   2  -2   66.60    3.31
  -7   2  -2   58.27    3.25
  -8   2  -2    0.51    1.01
  -8   2  -2    0.17    1.14
  -8   2  -2    0.64    0.38
  -8   2  -2    0.92    0.51
   8  -2   2    0.28    0.39
  -9   2  -2    0.92    0.58
  -9   2  -2    0.86    0.47
  -9   2  -2    1.37    0.47
   9  -2   2   -0.02    0.49
 -10   2  -2    1.45    0.47
  10  -2   2    1.07    0.56
  10   1  -2    3.62    0.63
   9   1  -2    9.96    0.73
   9   1  -2    9.93    0.75
  -9  -1   2    8.51    0.78
  -9  -1   2   11.58    0.84
  -9  -1   2   11.35    0.82
   8   1  -2    2.62    0.44
   8   1  -2    2.63    0.46
  -8  -1   2    1.71    0.51
  -8  -1   2    2.68    0.48
  -8  -1   2    2.59    0.52
   7   1  -2   10.10    0.68
   7   1  -2   11.09    0.66
  -7  -1   2   12.64    0.75
  -7  -1   2   12.40    1.32
  -7  -1   2   11.35    0.82
  -7  -1   2   10.24    0.73
   6   1  -2  124.65    3.28
   6   1  -2  126.47    3.30
  -6  -1   2  122.92    3.80
  -6  -1   2  130.35    4.62
  -6  -1   2  125.04    3.40
  -6  -1   2  130.27    3.80
  -6  -1   2  129.95    4.38
  -6  -1   2  127.35    3.39
  -6  -1   2  127.61    3.69
   5   1  -2   13.07    0.78
   5   1  -2   12.62    0.59
   5   1  -2   12.66    0.49
   5   1  -2   11.99    0.53
  -5  -1   2   11.68    0.72
  -5  -1   2   14.72    0.98
  -5  -1   2   12.57    1.08
  -5  -1   2   12.79    0.66
  -5  -1   2   13.77    0.59
  -5  -1   2   12.52    0.58
  -5  -1   2   13.35    0.60
  -5  -1   2   13.40    0.78
   4   1  -2  406.82   10.46
   4   1  -2  415.65   13.48
   4   1  -2  419.47   11.04
   4   1  -2  452.56   11.05
   4   1  -2  428.64   13.47
   4   1  -2  415.50   10.45
  -4  -1   2  421.64   11.87
  -4  -1   2  411.47   10.68
  -4  -1   2  447.77   11.05
  -4  -1   2  414.63   10.69
  -4  -1   2  417.82   13.22
  -4  -1   2  441.94   11.79
  -4  -1   2  429.99   11.49
   3   1  -2   14.37    0.45
   3   1  -2   13.78    0.57
   3   1  -2   14.01    0.57
   3   1  -2   15.25    0.70
   3   1  -2   13.88    0.49
   3   1  -2   13.54    0.71
  -3  -1   2   13.52    0.65
  -3  -1   2   14.98    0.89
  -3  -1   2   13.88    0.55
  -3  -1   2   14.38    0.56
  -3  -1   2   13.96    0.66
  -3  -1   2   14.48    0.55
  -3  -1   2   14.84    0.59
   2   1  -2  296.74    9.22
   2   1  -2  297.97    7.58
   2   1  -2  287.62    9.23
   2   1  -2  295.07    7.18
   2   1  -2  277.03    7.20
  -2  -1   2  291.24    9.21
  -2  -1   2  294.57    8.12
  -2  -1   2  284.14    7.34
   1   1  -2  274.78    7.06
   1   1  -2  278.06    8.59
   1   1  -2  261.23    8.60
  -1  -1   2  271.98    6.84
  -1  -1   2  266.62    8.58
  -1  -1   2  276.18    7.05
  -1  -1   2  265.89    8.59
   0   1  -2  122.17    3.94
   0   1  -2  116.99    3.92
   0   1  -2  123.11    3.23
   0  -1   2  119.94    3.93
   0  -1   2  120.33    3.92
   0  -1   2  119.59    3.22
  -1   1  -2  555.71   13.72
  -1   1  -2  577.32   18.59
  -1   1  -2  525.46   14.13
  -1   1  -2  563.92   17.34
  -1   1  -2  524.97   13.68
   1  -1   2  529.54   14.11
   1  -1   2  553.17   17.19
  -2   1  -2   26.67    1.33
  -2   1  -2   23.40    1.25
  -2   1  -2   25.64    0.87
  -2   1  -2   24.32    0.74
  -2   1  -2   25.09    0.97
  -2   1  -2   24.44    0.73
  -2   1  -2   26.81    0.91
   2  -1   2   24.65    0.85
   2  -1   2   26.11    1.04
  -3   1  -2  211.61    6.57
  -3   1  -2  205.06    5.87
  -3   1  -2  208.35    5.43
  -3   1  -2  211.63    5.84
  -3   1  -2  200.25    6.84
  -3   1  -2  201.69    5.20
  -3   1  -2  200.75    7.36
  -3   1  -2  210.02    6.62
  -3   1  -2  203.57    5.19
   3  -1   2  204.65    5.46
   3  -1   2  206.04    5.45
   3  -1   2  210.19    6.68
  -4   1  -2  185.43    6.55
  -4   1  -2  185.52    4.86
  -4   1  -2  191.75    6.25
  -4   1  -2  181.48    4.84
  -4   1  -2  194.49    5.52
  -4   1  -2  189.97    6.34
  -4   1  -2  191.75    7.03
  -4   1  -2  196.39    5.05
  -4   1  -2  192.63    5.50
  -4   1  -2  197.41    5.48
   4  -1   2  193.56    5.10
   4  -1   2  195.12    6.29
   4  -1   2  193.04    5.07
  -5   1  -2    0.21    0.54
  -5   1  -2    1.25    0.67
  -5   1  -2    0.94    0.20
  -5   1  -2    0.59    0.75
  -5   1  -2    0.91    0.64
  -5   1  -2    0.31    0.21
  -5   1  -2    0.10    0.32
  -5   1  -2    0.25    0.40
  -5   1  -2    0.50    0.38
  -5   1  -2    0.46    0.25
   5  -1   2    0.71    0.25
  -6   1  -2   14.23    1.52
  -6   1  -2   18.33    1.40
  -6   1  -2   16.24    0.78
  -6   1  -2   14.39    0.92
  -6   1  -2   15.13    1.51
  -6   1  -2   15.41    1.47
  -6   1  -2   15.65    0.68
   6  -1   2   14.27    0.59
  -7   1  -2   25.16    1.15
  -7   1  -2   25.36    1.00
  -7   1  -2   27.16    2.05
  -7   1  -2   23.96    1.93
  -7   1  -2   27.19    1.82
   7  -1   2   25.11    1.01
  -8   1  -2    2.51    0.48
  -8   1  -2    2.79    1.26
  -8   1  -2    1.40    0.57
  -8   1  -2    2.16    1.16
   8  -1   2    1.67    0.50
  -9   1  -2   12.51    1.00
  -9   1  -2   12.93    0.92
  -9   1  -2   12.78    0.85
   9  -1   2   12.70    0.90
 -10   1  -2    1.91    0.58
  10  -1   2    3.14    0.69
  10   0  -2    5.02    0.59
   9   0  -2    4.38    0.50
   9   0  -2    3.92    0.49
  -9   0   2    4.66    0.55
  -9   0   2    4.02    0.56
   8   0  -2   22.73    0.93
   8   0  -2   23.89    0.90
  -8   0   2   25.98    1.73
  -8   0   2   23.99    1.06
  -8   0   2   25.70    1.00
  -8   0   2   24.38    0.99
  -7   0   2    7.61    0.55
  -7   0   2    6.65    0.97
  -7   0   2    6.35    0.51
  -7   0   2    6.93    0.47
  -7   0   2    6.85    0.45
  -6   0   2   88.95    2.37
  -6   0   2   85.83    2.34
  -6   0   2   86.51    3.47
  -6   0   2   87.18    2.60
  -6   0   2   92.63    3.34
  -6   0   2   93.23    2.70
  -6   0   2   89.78    2.70
   5   0  -2    9.16    0.60
   5   0  -2    8.87    0.43
   5   0  -2    8.83    0.39
  -5   0   2    9.35    0.60
  -5   0   2    8.53    0.83
  -5   0   2    7.76    0.47
  -5   0   2    9.57    0.94
  -5   0   2    8.76    0.60
  -5   0   2    8.74    0.57
   4   0  -2   16.50    0.62
   4   0  -2   17.01    0.60
   4   0  -2   17.70    0.78
   4   0  -2   16.95    0.75
  -4   0   2   18.13    1.08
  -4   0   2   15.80    0.61
  -4   0   2   15.77    0.72
  -4   0   2   17.33    0.57
  -4   0   2   16.50    1.01
  -4   0   2   16.50    1.14
  -4   0   2   17.30    0.70
  -4   0   2   17.39    0.71
   3   0  -2   26.83    0.86
   3   0  -2   29.07    1.07
   3   0  -2   27.04    1.02
  -3   0   2   27.01    0.84
  -3   0   2   26.11    1.24
  -3   0   2   27.01    1.15
  -3   0   2   27.76    0.83
  -3   0   2   26.79    0.93
   2   0  -2  220.87    6.87
   2   0  -2  218.76    5.66
   2   0  -2  206.74    6.90
  -2   0   2  219.79    5.64
  -2   0   2  221.95    6.79
  -2   0   2  207.57    5.42
  -2   0   2  216.57    6.80
  -2   0   2  219.79    6.08
   1   0  -2    1.20    0.25
   1   0  -2    1.00    0.27
   1   0  -2    0.90    0.21
  -1   0   2    0.88    0.15
  -1   0   2    1.85    0.24
  -1   0   2    1.02    0.24
  -1   0   2    0.80    0.16
  -1   0   2    1.15    0.21
   0   0  -2  697.23   17.95
   0   0   2  690.37   17.95
   0   0   2  704.15   21.88
  -1   0  -2    5.06    0.43
  -1   0  -2    7.02    0.52
  -1   0  -2    6.16    0.49
  -1   0  -2    5.88    0.36
  -1   0  -2    4.97    0.35
  -1   0  -2    5.57    0.33
   1   0   2    5.79    0.38
   1   0   2    5.75    0.47
  -2   0  -2  271.74    7.34
  -2   0  -2  282.65    7.89
  -2   0  -2  273.33    7.11
  -2   0  -2  279.97    8.97
  -2   0  -2  282.84    9.69
  -2   0  -2  283.34    7.09
   2   0   2  278.61    7.36
   2   0   2  289.38    9.00
   2   0   2  285.37    6.97
   2   0   2  280.52    7.36
  -3   0  -2    1.29    0.31
  -3   0  -2    1.87    0.47
  -3   0  -2    1.29    0.24
  -3   0  -2    1.33    0.51
  -3   0  -2    1.14    0.19
  -3   0  -2    0.95    0.24
  -3   0  -2    0.69    0.28
  -3   0  -2    1.21    0.48
  -3   0  -2    1.29    0.19
  -3   0  -2    1.60    0.18
   3   0   2    1.21    0.26
   3   0   2    1.14    0.18
   3   0   2    1.50    0.38
   3   0   2    1.47    0.28
  -4   0  -2    0.64    0.54
  -4   0  -2    0.48    0.35
  -4   0  -2    0.42    0.30
  -4   0  -2    1.08    0.64
  -4   0  -2    0.52    0.33
  -4   0  -2    0.02    0.58
  -4   0  -2    0.43    0.25
  -4   0  -2    0.47    0.58
  -4   0  -2    0.38    0.24
   4   0   2    0.10    0.30
   4   0   2    0.36    0.26
   4   0   2    1.03    0.43
   4   0   2    0.48    0.22
  -5   0  -2    5.35    0.54
  -5   0  -2    6.60    0.43
  -5   0  -2    6.55    0.44
  -5   0  -2    6.26    1.00
  -5   0  -2    6.21    0.84
  -5   0  -2    6.77    0.61
  -5   0  -2    6.20    0.92
  -5   0  -2    6.79    0.51
  -5   0  -2    5.22    0.91
   5   0   2    6.15    0.40
  -6   0  -2   48.35    1.84
  -6   0  -2   50.63    1.67
  -6   0  -2   48.63    1.56
  -6   0  -2   53.74    2.62
  -6   0  -2   46.56    2.47
  -6   0  -2   50.89    1.86
  -6   0  -2   53.35    2.33
   6   0   2   51.55    1.56
  -7   0  -2    8.23    0.74
  -7   0  -2    7.88    0.79
  -7   0  -2    8.36    1.39
  -7   0  -2    6.39    1.29
  -7   0  -2    8.29    0.63
   7   0   2    7.69    0.64
  -8   0  -2   59.99    2.25
  -8   0  -2   53.83    3.26
  -8   0  -2   62.29    2.15
  -8   0  -2   60.35    2.01
   8   0   2   59.67    2.03
  -9   0  -2    0.30    1.28
  -9   0  -2    0.40    0.64
  -9   0  -2    0.09    0.55
   9   0   2   -0.26    0.55
 -10   0  -2   11.96    0.98
  10   0   2   11.68    1.01
  10  -1  -2    6.74    0.54
   9  -1  -2   11.90    0.64
   9  -1  -2   11.02    0.60
  -9   1   2   13.42    0.72
  -9   1   2   14.18    1.56
  -8   1   2    1.08    0.32
  -8   1   2    1.59    0.38
  -8   1   2    0.66    0.89
  -7   1   2   46.18    2.19
  -7   1   2   43.25    1.42
   6  -1  -2   10.80    0.62
  -6   1   2   10.53    1.06
  -6   1   2   10.88    0.54
  -6   1   2    9.84    0.50
  -6   1   2   11.43    1.03
   5  -1  -2   30.48    1.14
  -5   1   2   29.03    0.91
  -5   1   2   30.35    0.99
  -5   1   2   30.75    1.52
  -5   1   2   30.57    1.02
  -5   1   2   28.52    1.51
   4  -1  -2   21.09    0.87
   4  -1  -2   20.14    0.79
  -4   1   2   22.32    1.09
  -4   1   2   20.82    1.17
  -4   1   2   19.32    0.74
   3  -1  -2  203.16    5.18
   3  -1  -2  204.46    6.32
   3  -1  -2  200.05    6.30
  -3   1   2  199.18    5.16
  -3   1   2  201.83    6.31
  -3   1   2  197.76    5.16
  -3   1   2  191.80    5.35
  -3   1   2  193.70    5.59
   2  -1  -2   46.72    1.66
   2  -1  -2   50.23    1.39
   2  -1  -2   49.15    1.67
  -2   1   2   47.47    1.48
  -2   1   2   48.89    1.39
   1  -1  -2  874.67   26.79
   1  -1  -2  850.28   21.77
  -1   1   2  861.36   21.04
  -1   1   2  853.40   21.81
  -1   1   2  806.01   21.92
  -1   1   2  852.94   26.67
  -1   1   2  789.60   21.12
   0  -1  -2    0.61    0.26
   0  -1  -2    0.98    0.21
   0   1   2    0.79    0.20
   0   1   2    0.77    0.24
   0   1   2    0.40    0.19
  -1  -1  -2   77.31    2.57
  -1  -1  -2   74.67    2.03
  -1  -1  -2   73.12    2.00
  -1  -1  -2   73.40    2.57
  -1  -1  -2   76.52    2.64
  -1  -1  -2   74.04    2.10
   1   1   2   74.98    2.12
   1   1   2   73.91    2.57
   1   1   2   72.49    2.10
  -2  -1  -2  186.70    6.52
  -2  -1  -2  186.92    4.85
  -2  -1  -2  187.72    5.32
  -2  -1  -2  188.15    5.35
  -2  -1  -2  188.53    4.81
  -2  -1  -2  187.04    6.10
  -2  -1  -2  186.59    4.99
  -2  -1  -2  191.17    6.06
  -2  -1  -2  183.06    6.09
   2   1   2  183.70    4.99
   2   1   2  187.07    4.75
   2   1   2  191.14    6.11
   2   1   2  179.13    4.99
  -3  -1  -2   40.57    1.34
  -3  -1  -2   44.11    1.92
  -3  -1  -2   42.93    1.92
  -3  -1  -2   42.32    1.50
  -3  -1  -2   44.71    1.64
  -3  -1  -2   41.27    1.28
  -3  -1  -2   40.82    1.47
  -3  -1  -2   41.37    1.35
  -3  -1  -2   42.06    1.88
   3   1   2   43.28    1.29
   3   1   2   43.97    1.38
   3   1   2   43.80    1.37
   3   1   2   44.46    1.72
  -4  -1  -2  275.71    7.26
  -4  -1  -2  262.38    8.84
  -4  -1  -2  265.24    7.81
  -4  -1  -2  274.08    7.08
  -4  -1  -2  269.87    7.01
  -4  -1  -2  260.22    9.00
  -4  -1  -2  280.69    7.79
   4   1   2  277.35    7.27
   4   1   2  279.24    6.92
   4   1   2  273.73    8.90
   4   1   2  283.23    7.29
  -5  -1  -2    7.50    0.67
  -5  -1  -2    6.40    0.62
  -5  -1  -2    6.98    1.03
  -5  -1  -2    7.53    0.61
  -5  -1  -2    7.90    1.04
  -5  -1  -2    7.13    0.50
   5   1   2    7.19    0.54
  -6  -1  -2  150.96    4.72
  -6  -1  -2  148.55    5.64
  -6  -1  -2  156.32    4.22
  -6  -1  -2  159.41    4.31
  -6  -1  -2  155.62    5.79
  -6  -1  -2  158.30    4.74
   6   1   2  158.35    4.19
  -7  -1  -2    0.91    0.57
  -7  -1  -2    1.45    0.59
  -7  -1  -2    2.26    0.68
  -7  -1  -2    0.99    0.46
  -7  -1  -2    0.43    1.03
   7   1   2    0.37    0.49
  -8  -1  -2   22.17    2.14
  -8  -1  -2   23.54    1.37
  -8  -1  -2   21.59    1.40
  -8  -1  -2   21.34    1.35
   8   1   2   23.49    1.26
  -9  -1  -2    4.63    1.52
  -9  -1  -2    5.61    0.84
   9   1   2    5.70    0.81
 -10  -1  -2    0.09    0.63
  10  -2  -2    7.16    0.48
 -10   2   2   11.39    1.56
  -9   2   2    0.84    0.30
  -9   2   2    0.91    0.97
  -8   2   2   15.92    1.57
  -7   2   2   29.52    1.77
  -7   2   2   27.15    0.91
  -6   2   2    1.85    0.66
  -6   2   2    2.19    0.73
   5  -2  -2  267.45    8.48
  -5   2   2  262.96    8.62
  -5   2   2  271.15    8.65
   4  -2  -2    3.59    0.32
  -4   2   2    4.51    0.55
  -4   2   2    4.55    0.71
  -4   2   2    3.73    0.64
  -4   2   2    3.55    0.32
  -4   2   2    4.21    0.33
   3  -2  -2  520.78   13.30
   3  -2  -2  524.54   16.23
  -3   2   2  528.97   17.68
  -3   2   2  508.73   14.33
  -3   2   2  506.99   14.31
  -3   2   2  520.12   15.89
  -3   2   2  514.57   13.29
  -3   2   2  512.67   16.08
  -3   2   2  518.99   13.31
   2  -2  -2   54.70    1.93
   2  -2  -2   57.51    1.60
  -2   2   2   58.47    1.62
  -2   2   2   54.67    1.59
  -2   2   2   57.13    1.71
  -2   2   2   55.74    1.80
  -2   2   2   55.72    1.50
  -2   2   2   57.22    2.16
   1  -2  -2  551.44   14.47
   1  -2  -2  557.25   14.45
   1  -2  -2  562.70   17.62
  -1   2   2  565.63   14.03
  -1   2   2  581.28   18.84
  -1   2   2  565.79   14.46
  -1   2   2  509.10   14.07
  -1   2   2  579.42   15.51
  -1   2   2  552.57   17.58
  -1   2   2  570.16   14.46
   0  -2  -2   10.13    0.62
   0  -2  -2   10.19    0.51
   0  -2  -2    9.76    0.51
   0   2   2   11.30    0.51
   0   2   2   10.60    0.61
   0   2   2   11.22    0.51
  -1  -2  -2   27.49    1.19
  -1  -2  -2   27.88    1.00
  -1  -2  -2   29.09    1.07
  -1  -2  -2   27.82    0.98
   1   2   2   28.17    1.21
   1   2   2   27.56    0.97
   1   2   2   29.31    1.00
  -2  -2  -2  216.84    6.06
  -2  -2  -2  211.21    6.01
  -2  -2  -2  208.04    6.87
  -2  -2  -2  213.29    5.44
  -2  -2  -2  209.91    6.85
  -2  -2  -2  198.63    5.63
  -2  -2  -2  211.53    5.47
  -2  -2  -2  214.71    5.67
   2   2   2  205.18    5.64
   2   2   2  206.08    5.63
   2   2   2  209.77    5.36
   2   2   2  213.90    6.89
  -3  -2  -2   83.01    2.54
  -3  -2  -2   84.01    2.69
  -3  -2  -2   86.72    2.46
  -3  -2  -2   85.49    2.41
  -3  -2  -2   92.23    3.33
  -3  -2  -2   85.59    2.71
  -3  -2  -2   81.87    2.51
  -3  -2  -2   85.02    3.07
   3   2   2   87.37    2.54
   3   2   2   86.80    3.12
   3   2   2   89.40    2.56
   3   2   2   88.27    2.39
  -4  -2  -2   85.47    2.75
  -4  -2  -2   82.10    2.40
  -4  -2  -2   85.24    2.53
  -4  -2  -2   85.50    3.00
  -4  -2  -2   87.42    2.92
  -4  -2  -2   84.54    2.49
  -4  -2  -2   85.91    3.37
  -4  -2  -2   82.18    2.74
   4   2   2   83.28    2.40
  -5  -2  -2   16.21    1.48
  -5  -2  -2   15.18    0.95
  -5  -2  -2   16.44    1.01
  -5  -2  -2   14.25    1.03
  -5  -2  -2   16.29    0.85
   5   2   2   15.89    0.88
  -6  -2  -2    2.93    0.59
  -6  -2  -2    3.37    0.59
  -6  -2  -2    3.67    0.53
  -6  -2  -2    2.80    1.02
  -6  -2  -2    2.83    0.66
   6   2   2    3.69    0.54
  -7  -2  -2    2.76    0.74
  -7  -2  -2    3.54    0.67
  -7  -2  -2    1.32    0.65
  -7  -2  -2    2.24    0.68
  -7  -2  -2    2.21    1.16
   7   2   2    2.07    0.60
  -8  -2  -2   14.96    1.94
  -8  -2  -2   15.07    1.23
   8   2   2   16.55    1.12
  -9  -2  -2    0.76    1.35
  -9  -2  -2   -0.91    0.73
 -10   3   2    7.59    1.49
  -9   3   2   19.23    1.86
  -8   3   2    2.04    1.01
  -7   3   2  103.75    4.09
  -6   3   2   10.69    1.16
  -6   3   2    9.46    0.97
   5  -3  -2   70.13    2.29
  -5   3   2   64.22    2.71
  -5   3   2   65.01    2.03
  -5   3   2   69.27    1.99
  -5   3   2   72.26    2.66
  -5   3   2   65.76    2.97
   4  -3  -2   71.67    2.36
   4  -3  -2   71.04    1.85
  -4   3   2   65.03    2.08
  -4   3   2   71.44    2.92
  -4   3   2   67.23    2.65
  -4   3   2   70.29    2.58
  -4   3   2   71.18    2.07
  -4   3   2   70.08    2.08
  -4   3   2   65.75    1.96
   3  -3  -2   12.48    0.66
   3  -3  -2   12.40    0.52
  -3   3   2   11.82    0.52
  -3   3   2   13.31    0.96
  -3   3   2   11.19    0.58
  -3   3   2   12.56    0.96
  -3   3   2   12.62    0.50
  -3   3   2   12.29    0.62
  -3   3   2   12.51    0.56
  -3   3   2   11.58    0.88
   2  -3  -2    2.06    0.28
   2  -3  -2    1.93    0.33
   2  -3  -2    1.90    0.29
   2  -3  -2    2.21    0.20
   2  -3  -2    1.76    0.27
  -2   3   2    1.78    0.24
  -2   3   2    2.67    0.32
  -2   3   2    2.03    0.30
  -2   3   2    1.39    0.25
  -2   3   2    2.41    0.39
  -2   3   2    2.21    0.29
   1  -3  -2  147.25    4.12
   1  -3  -2  145.71    5.00
   1  -3  -2  155.19    4.12
  -1   3   2  152.04    3.99
  -1   3   2  158.96    4.41
  -1   3   2  148.58    4.96
  -1   3   2  151.28    3.95
  -1   3   2  146.26    4.11
  -1   3   2  156.96    5.25
  -1   3   2  150.17    4.11
  -1   3   2  156.96    4.37
   0  -3  -2  105.31    3.74
   0  -3  -2  115.67    3.11
   0  -3  -2  113.27    3.12
   0   3   2  109.38    2.97
   0   3   2  113.21    3.75
   0   3   2  112.67    3.28
   0   3   2  105.99    3.07
   0   3   2  106.52    3.09
  -1  -3  -2  122.47    4.30
  -1  -3  -2  116.37    3.55
  -1  -3  -2  128.97    3.79
  -1  -3  -2  128.05    3.55
   1   3   2  128.04    3.54
   1   3   2  132.31    3.74
   1   3   2  125.77    3.55
   1   3   2  131.42    4.32
  -2  -3  -2    2.50    0.43
  -2  -3  -2    2.55    0.72
  -2  -3  -2    2.64    0.35
  -2  -3  -2    2.54    0.38
  -2  -3  -2    2.53    0.40
  -2  -3  -2    2.42    0.37
  -2  -3  -2    2.79    0.51
  -2  -3  -2    2.71    0.45
   2   3   2    3.08    0.40
   2   3   2    3.53    0.52
   2   3   2    2.85    0.42
   2   3   2    2.93    0.41
  -3  -3  -2   92.23    2.63
  -3  -3  -2   89.06    2.73
  -3  -3  -2   92.16    2.67
  -3  -3  -2   89.28    3.33
  -3  -3  -2   91.04    2.93
  -3  -3  -2   89.10    3.50
  -3  -3  -2   93.10    2.78
  -3  -3  -2   90.78    2.96
   3   3   2   90.49    2.87
   3   3   2   91.74    2.73
   3   3   2   96.25    2.61
   3   3   2   92.11    3.37
   3   3   2   93.50    2.75
  -4  -3  -2    5.28    0.64
  -4  -3  -2    4.96    0.63
  -4  -3  -2    5.06    0.52
  -4  -3  -2    4.97    0.98
  -4  -3  -2    4.66    0.56
   4   3   2    5.43    0.54
  -5  -3  -2    0.23    0.50
  -5  -3  -2    0.78    0.49
  -5  -3  -2    1.21    0.51
  -5  -3  -2    0.92    0.85
   5   3   2    1.13    0.45
  -6  -3  -2    9.99    0.95
  -6  -3  -2   10.56    1.44
  -6  -3  -2   10.71    1.02
   6   3   2   11.10    0.85
  -7  -3  -2   42.76    1.93
  -7  -3  -2   40.55    2.67
  -7  -3  -2   40.70    1.88
  -8  -3  -2    1.60    0.87
  -8  -3  -2    2.53    1.34
  -8  -3  -2    0.75    0.73
  -9  -3  -2   17.14    2.16
  -9  -3  -2   17.94    1.46
 -10   4   2    9.98    1.59
  -9   4   2    1.44    1.09
  -8   4   2   20.82    1.87
  -7   4   2    0.74    0.80
  -6   4   2   10.52    1.16
  -6   4   2    9.88    1.18
   5  -4  -2   11.20    0.68
  -5   4   2    9.38    1.05
  -5   4   2    9.74    0.56
  -5   4   2    9.59    0.59
  -5   4   2    9.71    1.07
  -5   4   2   11.58    0.99
  -5   4   2    8.99    0.49
   4  -4  -2    6.01    0.52
   4  -4  -2    5.69    0.36
  -4   4   2    5.66    0.38
  -4   4   2    6.16    0.83
  -4   4   2    5.90    0.38
  -4   4   2    5.09    0.42
  -4   4   2    5.23    0.32
  -4   4   2    5.36    0.43
  -4   4   2    4.25    0.34
  -4   4   2    5.93    0.45
  -4   4   2    4.30    0.69
  -4   4   2    5.88    0.72
   3  -4  -2  158.07    4.09
   3  -4  -2  150.26    4.99
   3  -4  -2  140.79    3.87
   3  -4  -2  147.10    3.80
  -3   4   2  150.17    4.22
  -3   4   2  154.42    4.07
  -3   4   2  153.95    4.09
  -3   4   2  150.38    5.07
  -3   4   2  148.67    3.98
  -3   4   2  153.00    5.49
  -3   4   2  146.35    4.38
  -3   4   2  157.83    4.37
   2  -4  -2   80.46    2.39
   2  -4  -2   80.11    2.89
   2  -4  -2   83.56    2.38
   2  -4  -2   84.02    2.21
  -2   4   2   80.24    2.54
  -2   4   2   84.46    2.31
  -2   4   2   84.42    2.94
  -2   4   2   82.47    2.37
  -2   4   2   80.94    2.52
  -2   4   2   80.07    3.07
  -2   4   2   82.78    2.37
  -2   4   2   83.49    2.78
   1  -4  -2   60.45    1.89
   1  -4  -2   59.76    2.27
   1  -4  -2   58.22    1.86
  -1   4   2   63.19    1.80
  -1   4   2   60.71    1.78
  -1   4   2   62.11    1.87
  -1   4   2   62.06    1.87
  -1   4   2   59.63    1.96
  -1   4   2   61.70    2.21
  -1   4   2   61.05    2.28
  -1   4   2   62.16    2.00
   0  -4  -2  144.65    3.90
   0  -4  -2  137.36    3.89
   0  -4  -2  129.31    4.70
   0  -4  -2  138.93    4.12
   0   4   2  136.17    4.08
   0   4   2  146.34    4.14
   0   4   2  137.39    3.89
   0   4   2  138.52    3.87
   0   4   2  136.25    4.68
   0   4   2  139.81    3.72
  -1  -4  -2   84.66    2.61
  -1  -4  -2   80.55    2.61
  -1  -4  -2   77.18    2.44
  -1  -4  -2   80.39    2.96
  -1  -4  -2   77.49    2.43
   1   4   2   78.80    2.41
   1   4   2   78.02    2.44
   1   4   2   82.96    2.95
   1   4   2   82.11    2.56
  -2  -4  -2   61.61    2.02
  -2  -4  -2   63.02    2.18
  -2  -4  -2   57.45    2.41
  -2  -4  -2   63.21    2.19
  -2  -4  -2   61.72    2.05
   2   4   2   63.35    2.03
   2   4   2   61.71    2.45
   2   4   2   63.43    2.01
   2   4   2   63.97    2.15
  -3  -4  -2  272.47    7.50
  -3  -4  -2  272.69    9.08
  -3  -4  -2  274.63    7.48
  -3  -4  -2  277.04    8.01
  -3  -4  -2  273.07    7.96
  -3  -4  -2  266.75    9.10
   3   4   2  279.29    7.49
   3   4   2  276.39    7.88
   3   4   2  271.87    9.10
  -4  -4  -2    4.31    1.01
  -4  -4  -2    3.32    0.64
  -4  -4  -2    3.16    0.63
  -5  -4  -2  179.46    5.56
  -5  -4  -2  175.32    6.51
  -5  -4  -2  182.00    5.59
  -6  -4  -2    2.46    1.08
  -6  -4  -2    4.57    0.83
  -6  -4  -2    3.02    0.75
  -7  -4  -2   37.17    1.90
  -7  -4  -2   40.14    2.67
  -7  -4  -2   39.62    1.96
  -8  -4  -2    5.26    1.06
  -8  -4  -2    3.18    0.92
  -8  -4  -2    4.32    1.47
  -9  -4  -2    3.10    1.52
  -9  -4  -2    2.35    0.95
 -10   5   2    1.06    1.24
  -9   5   2    2.94    1.25
  -8   5   2    0.91    1.04
  -7   5   2    0.38    0.83
  -6   5   2   74.21    3.42
  -6   5   2   73.74    2.26
  -6   5   2   73.64    2.18
  -6   5   2   68.31    3.12
  -5   5   2    0.60    0.64
  -5   5   2    0.83    0.32
  -5   5   2    1.39    0.35
  -5   5   2    0.85    0.61
   4  -5  -2  203.20    5.20
   4  -5  -2  212.59    6.81
   4  -5  -2  197.39    5.28
  -4   5   2  198.05    5.95
  -4   5   2  210.33    5.39
  -4   5   2  212.33    5.49
  -4   5   2  211.55    5.77
  -4   5   2  212.23    5.92
  -4   5   2  207.94    7.51
  -4   5   2  199.36    6.88
   3  -5  -2   49.94    1.45
   3  -5  -2   46.04    1.58
   3  -5  -2   50.22    1.96
  -3   5   2   50.64    1.63
  -3   5   2   47.58    1.67
  -3   5   2   49.49    1.57
  -3   5   2   48.36    1.53
  -3   5   2   49.48    2.20
  -3   5   2   52.02    1.73
  -3   5   2   47.13    1.55
  -3   5   2   50.74    2.11
   2  -5  -2  191.51    5.31
   2  -5  -2  191.97    5.33
   2  -5  -2  186.44    6.46
   2  -5  -2  194.03    5.02
  -2   5   2  189.97    5.29
  -2   5   2  196.08    5.64
  -2   5   2  193.04    5.67
  -2   5   2  198.24    6.35
  -2   5   2  197.00    5.14
  -2   5   2  195.85    6.88
  -2   5   2  203.66    6.35
  -2   5   2  194.86    5.30
   1  -5  -2  114.31    3.56
   1  -5  -2  116.32    3.38
   1  -5  -2  110.43    4.07
   1  -5  -2  120.22    3.38
  -1   5   2  118.68    3.22
  -1   5   2  117.07    4.19
  -1   5   2  117.10    4.02
  -1   5   2  113.73    3.55
  -1   5   2  120.71    3.95
  -1   5   2  116.87    3.34
  -1   5   2  115.62    3.23
  -1   5   2  112.22    3.34
  -1   5   2  119.70    3.59
   0  -5  -2   23.29    1.18
   0  -5  -2   22.82    1.02
   0  -5  -2   20.66    1.21
   0  -5  -2   22.83    1.03
   0   5   2   22.60    1.15
   0   5   2   22.62    1.00
   0   5   2   22.50    1.18
   0   5   2   22.12    0.99
   0   5   2   22.88    1.13
   0   5   2   24.21    1.15
  -1  -5  -2  284.66    7.84
  -1  -5  -2  296.00    8.38
  -1  -5  -2  278.83    9.51
  -1  -5  -2  298.40    8.34
  -1  -5  -2  277.27    7.81
   1   5   2  287.87    7.80
   1   5   2  282.38    8.27
   1   5   2  294.98    8.36
   1   5   2  285.03    7.82
   1   5   2  295.22    9.50
  -2  -5  -2   21.07    1.18
  -2  -5  -2   21.15    1.07
  -2  -5  -2   22.41    1.30
  -2  -5  -2   21.64    1.08
  -2  -5  -2   21.91    1.32
   2   5   2   21.14    1.06
   2   5   2   21.87    1.04
   2   5   2   23.51    1.13
  -3  -5  -2  112.22    4.58
  -3  -5  -2  116.18    3.84
  -3  -5  -2  122.69    3.66
  -3  -5  -2  122.03    3.90
   3   5   2  119.60    3.78
  -4  -5  -2   17.05    1.19
  -4  -5  -2   21.00    1.79
  -4  -5  -2   17.05    1.24
  -5  -5  -2    0.68    0.96
  -5  -5  -2   -0.55    0.58
  -5  -5  -2    0.21    0.62
  -6  -5  -2    1.12    0.75
  -6  -5  -2    1.97    0.80
  -6  -5  -2    1.44    1.13
  -7  -5  -2   14.31    1.87
  -7  -5  -2   11.29    1.26
  -7  -5  -2   13.64    1.31
  -8  -5  -2    1.16    0.95
  -8  -5  -2    0.48    0.86
  -8  -5  -2    1.96    1.44
  -9  -5  -2   11.82    1.42
  -9  -5  -2   12.82    1.47
  -9  -5  -2   11.15    2.00
  -9   6   2    1.79    1.24
  -8   6   2   20.45    1.95
  -8   6   2   19.51    0.80
  -7   6   2    0.30    0.93
  -7   6   2    1.08    0.97
  -7   6   2    0.46    0.35
   6  -6  -2   51.53    1.46
  -6   6   2   53.44    2.74
  -6   6   2   50.64    1.74
  -6   6   2   49.55    1.58
  -6   6   2   48.06    2.54
   5  -6  -2   -0.27    0.26
  -5   6   2   -0.37    0.67
  -5   6   2   -0.08    0.64
  -5   6   2    0.38    0.34
  -5   6   2   -0.26    0.36
   4  -6  -2   26.62    1.00
  -4   6   2   24.76    1.54
  -4   6   2   29.30    1.24
  -4   6   2   29.87    1.68
  -4   6   2   26.78    1.22
  -4   6   2   28.76    1.07
   3  -6  -2   21.95    1.25
   3  -6  -2   22.88    0.95
  -3   6   2   25.83    1.18
  -3   6   2   22.46    1.13
  -3   6   2   26.51    1.45
  -3   6   2   23.40    1.38
  -3   6   2   21.19    0.98
   2  -6  -2   52.07    2.22
  -2   6   2   56.89    2.24
  -2   6   2   53.16    1.94
  -2   6   2   52.87    1.74
  -2   6   2   54.18    2.28
  -2   6   2   55.87    1.95
   1  -6  -2    8.99    0.71
   1  -6  -2    6.54    0.70
   1  -6  -2    6.38    0.78
  -1   6   2    7.33    0.79
  -1   6   2    7.91    0.67
  -1   6   2    7.64    0.69
  -1   6   2    6.38    0.64
  -1   6   2    6.41    0.63
   0  -6  -2  207.51    5.75
   0  -6  -2  203.32    6.97
   0  -6  -2  212.10    5.77
   0  -6  -2  200.88    6.06
   0   6   2  207.26    5.70
   0   6   2  207.86    6.10
   0   6   2  193.13    6.01
   0   6   2  210.53    6.55
   0   6   2  197.31    7.16
   0   6   2  201.76    5.72
  -1  -6  -2    6.27    0.73
  -1  -6  -2    5.16    0.76
  -1  -6  -2    4.28    0.61
  -1  -6  -2    5.87    0.69
   1   6   2    6.69    0.69
   1   6   2    6.58    0.65
   1   6   2    6.07    0.67
   1   6   2    5.08    0.62
  -2  -6  -2   84.02    2.95
  -2  -6  -2   82.70    3.34
  -2  -6  -2   80.41    2.77
   2   6   2   85.78    2.90
   2   6   2   88.34    2.79
  -3  -6  -2    0.32    0.52
  -3  -6  -2    0.21    0.58
  -3  -6  -2   -1.41    0.85
   3   6   2   -0.34    0.46
  -4  -6  -2    1.33    0.67
  -4  -6  -2    0.92    0.67
  -4  -6  -2    0.66    1.07
  -5  -6  -2    6.77    1.03
  -5  -6  -2    8.36    1.07
  -5  -6  -2    7.58    1.48
  -6  -6  -2   21.89    2.16
  -6  -6  -2   19.26    1.57
  -6  -6  -2   20.47    1.58
  -7  -6  -2   10.28    1.79
  -7  -6  -2    8.60    1.23
  -7  -6  -2   13.39    1.39
  -8  -6  -2   13.08    1.49
  -8  -6  -2   13.26    1.43
  -8  -6  -2   12.09    1.94
  -9   7   2    4.16    1.39
   8  -7  -2    4.12    0.46
  -8   7   2    2.78    1.23
  -8   7   2    4.43    0.50
  -7   7   2   10.56    0.70
  -7   7   2   11.04    1.52
  -7   7   2   10.42    1.43
   6  -7  -2    3.31    0.44
  -6   7   2    3.15    0.99
  -6   7   2    3.19    0.54
  -6   7   2    2.81    0.51
  -6   7   2    2.85    0.99
   5  -7  -2    6.74    0.58
  -5   7   2    8.02    1.11
  -5   7   2    6.76    0.63
  -5   7   2    8.96    0.74
  -5   7   2    6.52    0.65
  -5   7   2    6.53    1.09
   4  -7  -2   44.35    1.46
  -4   7   2   37.55    2.07
  -4   7   2   41.37    2.14
  -4   7   2   41.50    1.68
  -4   7   2   38.43    1.63
  -4   7   2   42.97    1.50
  -3   7   2    8.51    0.68
  -3   7   2    9.27    0.77
  -3   7   2    7.93    0.76
  -3   7   2    9.14    1.03
  -3   7   2    8.18    0.91
  -2   7   2   40.69    1.71
  -2   7   2   40.82    1.67
  -2   7   2   45.32    1.95
   1  -7  -2   70.99    2.51
  -1   7   2   70.33    2.51
  -1   7   2   71.73    2.53
  -1   7   2   70.71    2.71
   0  -7  -2    1.41    0.65
   0  -7  -2    2.21    0.63
   0   7   2    3.84    0.65
   0   7   2    1.78    0.57
  -1  -7  -2   28.77    1.65
  -1  -7  -2   28.56    1.48
  -1  -7  -2   28.46    1.37
   1   7   2   25.73    1.28
   1   7   2   25.71    1.38
  -2  -7  -2   49.63    2.08
  -2  -7  -2   49.81    2.38
   2   7   2   47.67    2.05
  -3  -7  -2    1.97    0.75
  -3  -7  -2    0.79    1.08
   3   7   2    1.25    0.66
  -4  -7  -2   87.30    3.28
  -4  -7  -2   77.69    3.09
  -4  -7  -2   80.47    3.95
  -5  -7  -2    6.31    1.07
  -5  -7  -2    8.30    1.52
  -5  -7  -2    4.97    1.02
  -6  -7  -2   45.55    2.33
  -6  -7  -2   35.40    2.15
  -6  -7  -2   40.00    2.79
  -7  -7  -2    3.16    1.03
  -7  -7  -2    2.60    1.45
  -7  -7  -2    2.53    1.09
  -8  -7  -2   10.30    1.94
  -8  -7  -2    9.33    1.36
  -8  -7  -2   10.48    1.47
   8  -8  -2    0.86    0.45
  -8   8   2    1.12    1.17
  -8   8   2    0.52    0.50
   7  -8  -2   10.89    0.79
  -7   8   2   10.53    1.51
  -7   8   2   12.04    0.83
   6  -8  -2    0.58    0.47
  -6   8   2    0.56    0.48
  -6   8   2    0.14    0.93
  -6   8   2    0.61    0.50
  -5   8   2   50.36    1.99
  -5   8   2   50.42    1.81
  -5   8   2   49.74    2.53
  -5   8   2   46.44    1.90
  -4   8   2   -0.63    0.48
  -4   8   2    0.73    0.49
  -4   8   2    0.09    0.52
  -4   8   2    0.29    0.78
  -3   8   2   92.09    3.13
  -3   8   2   96.88    3.62
  -3   8   2   89.25    3.12
  -2   8   2   18.47    1.21
  -2   8   2   17.03    1.18
  -2   8   2   16.62    1.24
  -1   8   2   71.19    2.58
  -1   8   2   73.70    2.72
  -1   8   2   60.04    2.45
   0  -8  -2   87.01    3.06
   0   8   2   78.02    2.96
   0   8   2   86.49    3.04
  -1  -8  -2    2.79    0.77
   1   8   2    3.72    0.76
  -2  -8  -2   69.61    2.76
   2   8   2   65.59    2.66
  -3  -8  -2    5.96    1.02
  -3  -8  -2    6.15    1.59
   3   8   2    5.23    0.92
  -4  -8  -2   15.87    1.45
  -4  -8  -2   18.17    2.10
  -5  -8  -2    0.93    0.89
  -5  -8  -2    1.48    1.34
  -6  -8  -2   -1.52    0.90
  -6  -8  -2    0.66    1.36
  -6  -8  -2    0.41    0.93
  -7  -8  -2    0.41    1.05
  -7  -8  -2    1.10    1.43
  -7  -8  -2    1.32    1.03
  -8   9   2    1.64    1.25
  -7   9   2   33.12    1.50
  -7   9   2   32.78    2.37
  -7   9   2   36.40    1.55
  -6   9   2    0.42    0.56
  -6   9   2   -0.12    0.97
  -5   9   2   19.62    1.74
  -5   9   2   19.79    1.39
  -5   9   2   16.92    1.20
  -4   9   2    0.37    0.61
  -4   9   2    0.59    0.63
  -4   9   2    0.23    0.84
  -3   9   2    2.69    0.72
  -3   9   2    2.63    0.73
  -3   9   2    4.05    0.98
  -2   9   2    8.31    0.96
  -2   9   2   11.26    1.17
  -2   9   2    8.44    0.96
  -1   9   2   26.49    1.56
  -1   9   2   20.95    1.38
   0  -9  -2   11.05    1.12
   0   9   2   11.37    1.12
  -1  -9  -2   25.08    1.69
   1   9   2   24.61    1.53
  -2  -9  -2   -0.10    0.77
   2   9   2    0.63    0.73
  -3  -9  -2   12.70    1.97
  -3  -9  -2   12.04    1.37
   3   9   2   14.31    1.36
  -4  -9  -2   10.26    1.37
  -4  -9  -2   12.94    1.99
  -5  -9  -2    0.34    1.39
  -5  -9  -2    0.69    0.95
  -6  -9  -2   10.60    1.90
  -6  -9  -2   10.99    1.51
  -7  10   2   -0.28    0.60
  -7  10   2    0.39    1.15
  -6  10   2    0.77    0.61
  -6  10   2   -0.64    0.99
  -5  10   2    5.29    1.18
  -5  10   2    3.48    0.76
  -5  10   2    2.88    0.85
  -4  10   2    3.80    0.86
  -4  10   2    3.90    1.07
  -4  10   2    3.51    0.78
  -3  10   2   22.94    1.64
  -3  10   2   21.49    1.51
  -3  10   2   24.12    1.54
  -2  10   2    4.64    0.90
  -2  10   2    6.67    1.02
  -1  10   2   22.81    1.64
  -1  10   2   16.89    1.37
   0  10   2    1.73    0.80
  -1 -10  -2    8.42    1.19
   1  10   2    6.98    1.04
  -2 -10  -2    0.90    0.91
  -2 -10  -2    0.18    1.47
   2  10   2    1.44    0.90
  -3 -10  -2   47.49    3.20
  -3 -10  -2   44.42    2.35
   3  10   2   43.69    2.40
  -4 -10  -2    1.08    0.94
  -4 -10  -2    0.27    1.47
  -5 -10  -2   26.46    2.11
  -5 -10  -2   24.91    2.58
  -6 -10  -2    2.91    1.62
  -6 -10  -2    1.13    1.12
  -6  11   2    8.07    1.46
  -6  11   2   10.77    1.04
  -5  11   2   -0.05    1.04
  -5  11   2   -0.13    0.82
  -5  11   2    0.44    0.68
  -4  11   2   24.04    1.71
  -4  11   2   22.21    1.57
  -4  11   2   22.99    1.80
  -3  11   2    4.15    0.93
  -3  11   2    3.67    0.93
  -2  11   2   14.93    1.39
  -2  11   2   15.72    1.42
  -1  11   2   19.22    1.56
   0  11   2    2.44    0.89
   1  11   2   36.28    2.11
  -2 -11  -2   -0.72    0.93
  -2 -11  -2    1.27    1.57
   2  11   2    0.18    0.88
  -3 -11  -2   25.67    2.04
  -3 -11  -2   26.76    2.67
   3  11   2   29.12    2.09
  -4 -11  -2   -0.52    1.48
  -4 -11  -2   -0.93    0.99
  -5 -11  -2    1.27    1.18
  -5  12   2    1.29    0.81
  -5  12   2   -0.13    0.86
  -4  12   2    1.93    0.97
  -4  12   2    3.99    0.99
  -3  12   2    7.01    1.18
  -3  12   2    6.38    1.17
  -2  12   2    0.24    0.88
  -2  12   2    1.94    0.92
  -1  12   2    4.65    1.07
   0  12   2   13.47    1.46
   1  12   2    0.05    0.90
  -2 -12  -2    4.41    1.30
   2  12   2    6.59    1.31
  -3 -12  -2    0.84    1.10
   3  12   2    2.19    1.14
  -3  13   2   -1.04    0.89
  -3  13   2    0.59    0.92
  -2  13   2    6.50    1.20
  -2  13   2    5.88    1.28
  -1  13   2    3.85    1.09
   0  13   2    0.51    0.97
   1  13   2    1.02    1.06
   0  14  -3    0.89    1.07
  -1  14  -3    3.72    1.17
   3  13  -3    2.31    1.19
  -3 -13   3    2.56    1.21
   2  13  -3    4.42    1.25
   1  13  -3   20.52    1.84
   0  13  -3    2.59    1.07
  -1  13  -3   29.07    1.95
  -2  13  -3    1.03    0.98
  -2  13  -3    0.97    0.97
  -3  13  -3   16.10    1.58
  -3  13  -3   16.12    1.58
  -4  13  -3   -1.52    0.82
  -4  13  -3    0.85    0.89
  -5 -12   3    3.39    1.26
  -4 -12   3    2.61    1.14
   3  12  -3    7.05    1.32
  -3 -12   3    8.95    1.37
   2  12  -3    5.05    1.12
  -2 -12   3    5.31    1.21
   1  12  -3    3.17    1.08
   0  12  -3    6.41    1.16
  -1  12  -3    0.34    0.86
  -2  12  -3    0.02    0.85
  -2  12  -3    0.74    0.95
  -3  12  -3    3.59    1.00
  -3  12  -3    6.06    1.10
  -4  12  -3    0.38    0.84
  -4  12  -3   -0.72    0.75
  -5  12  -3   10.32    2.15
  -5  12  -3   12.45    1.31
  -5  12  -3   11.59    1.23
  -6 -11   3    4.76    1.25
  -5 -11   3   -1.09    0.97
  -4 -11   3    7.74    1.30
   3  11  -3    0.38    0.95
  -3 -11   3    1.37    0.99
   2  11  -3   15.61    1.46
  -2 -11   3   12.37    1.43
   1  11  -3    0.22    0.81
  -1 -11   3   -1.72    0.75
   0  11  -3    0.55    1.32
   0  11  -3    0.89    0.79
  -1  11  -3    7.51    1.64
  -1  11  -3    6.37    1.09
  -1  11  -3    4.69    1.03
  -2  11  -3   17.17    1.48
  -2  11  -3   19.62    1.54
  -2  11  -3   18.24    2.14
  -3  11  -3    0.69    1.23
  -3  11  -3    0.23    0.79
  -3  11  -3    1.05    0.77
  -4  11  -3   28.40    1.72
  -4  11  -3   35.09    1.96
  -4  11  -3   34.65    2.84
  -5  11  -3    4.43    1.74
  -5  11  -3    2.80    0.93
  -5  11  -3    2.41    0.80
  -5  11  -3    5.15    1.55
  -5  11  -3    2.27    1.06
  -6  11  -3    8.34    0.97
  -6  11  -3   11.11    1.65
  -6  11  -3    8.99    1.90
  -7 -10   3    3.25    1.14
  -6 -10   3    7.14    1.31
  -5 -10   3   12.32    1.46
  -4 -10   3   -0.30    0.86
   3  10  -3   18.01    1.52
  -3 -10   3   18.98    1.56
   2  10  -3   69.38    2.82
  -2 -10   3   68.06    2.86
   1  10  -3   11.21    1.21
  -1 -10   3   14.08    1.28
   0  10  -3   78.58    3.13
   0  10  -3   86.71    4.38
  -1  10  -3    2.65    1.25
  -1  10  -3    3.57    0.87
  -1  10  -3    2.83    0.83
  -2  10  -3   56.36    2.50
  -2  10  -3   63.86    3.51
  -2  10  -3   59.60    2.52
  -3  10  -3   -0.32    0.67
  -3  10  -3   -0.43    0.71
  -3  10  -3    0.27    1.03
  -4  10  -3   11.83    1.41
  -4  10  -3   15.87    1.98
  -4  10  -3   12.09    1.20
  -4  10  -3   12.42    1.15
  -5  10  -3    5.73    0.85
  -5  10  -3    7.97    1.82
  -5  10  -3    4.93    1.20
  -5  10  -3    5.32    0.94
  -5  10  -3    6.37    1.56
  -6  10  -3    2.78    1.44
  -6  10  -3    1.49    0.66
  -6  10  -3    2.08    1.11
  -6  10  -3    1.73    1.50
  -7  10  -3    5.50    0.69
  -7  10  -3    2.26    1.30
  -7  10  -3    5.99    0.87
  -7  -9   3   26.57    2.05
  -7  -9   3   26.71    2.05
  -6  -9   3    3.90    1.07
  -5  -9   3   11.06    1.31
   4   9  -3   25.46    1.72
  -4  -9   3   24.83    1.65
   3   9  -3    0.65    0.73
  -3  -9   3   -1.16    0.71
   2   9  -3   64.92    2.60
  -2  -9   3   66.70    2.71
   1   9  -3   23.95    1.48
  -1  -9   3   26.57    1.58
   0   9  -3   19.84    1.40
   0   9  -3   19.27    1.41
   0  -9   3   18.94    1.33
  -1   9  -3   27.98    1.59
  -1   9  -3   25.88    1.58
  -1   9  -3   28.83    2.43
  -2   9  -3   15.88    1.21
  -2   9  -3   17.32    1.85
  -2   9  -3   16.17    1.25
  -3   9  -3    3.31    1.23
  -3   9  -3    1.13    0.65
  -3   9  -3    1.48    0.80
  -3   9  -3    1.66    0.70
  -4   9  -3   22.83    1.42
  -4   9  -3   21.38    2.20
  -4   9  -3   25.22    1.69
  -4   9  -3   24.83    1.53
  -5   9  -3    2.31    0.73
  -5   9  -3    3.60    1.06
  -5   9  -3    2.90    1.37
  -5   9  -3    2.12    0.68
  -5   9  -3    2.77    1.24
   5  -9   3    2.19    0.62
  -6   9  -3   10.19    1.48
  -6   9  -3   11.51    0.92
  -6   9  -3   11.56    1.96
  -6   9  -3   12.95    1.90
   6  -9   3   11.66    0.93
  -7   9  -3    3.31    1.58
  -7   9  -3    5.24    0.81
  -7   9  -3    3.88    0.59
  -7   9  -3    5.24    1.37
   7  -9   3    4.94    0.74
  -8   9  -3    1.29    1.27
   8  -9   3    1.83    0.64
  -8  -8   3    0.02    0.94
  -8  -8   3   -0.99    0.83
  -7  -8   3    0.41    0.89
  -7  -8   3   -0.09    0.88
  -6  -8   3    1.40    0.92
  -6  -8   3    1.21    0.88
  -5  -8   3   38.86    2.09
  -5  -8   3   40.23    2.19
   4   8  -3    0.22    0.66
  -4  -8   3   -1.44    0.58
   3   8  -3  129.05    4.20
  -3  -8   3  123.43    4.25
   2   8  -3   -0.68    0.52
  -2  -8   3    0.30    0.57
  -2  -8   3    0.68    0.61
   1   8  -3   20.97    1.29
  -1  -8   3   20.95    1.34
   0   8  -3   -0.62    0.49
   0   8  -3    0.27    0.52
   0  -8   3    0.62    0.56
  -1   8  -3   28.80    1.57
  -1   8  -3   31.94    2.46
  -1   8  -3   32.32    1.57
  -2   8  -3    5.99    1.22
  -2   8  -3    7.42    0.87
  -2   8  -3    5.28    0.77
  -2   8  -3    5.82    0.76
  -3   8  -3   71.65    2.93
  -3   8  -3   71.92    2.61
  -3   8  -3   69.84    2.56
  -3   8  -3   73.51    3.64
  -4   8  -3    5.78    0.75
  -4   8  -3    7.68    0.70
  -4   8  -3    7.19    0.85
  -4   8  -3    6.14    1.02
  -4   8  -3    8.31    1.42
   4  -8   3    6.23    0.66
  -5   8  -3   30.16    1.47
  -5   8  -3   31.70    2.00
  -5   8  -3   35.49    1.61
  -5   8  -3   30.35    1.53
  -5   8  -3   31.27    1.37
  -5   8  -3   32.93    2.67
  -5   8  -3   30.58    2.52
   5  -8   3   32.28    1.32
  -6   8  -3    8.11    1.71
  -6   8  -3    5.55    0.67
  -6   8  -3    5.43    0.77
  -6   8  -3    7.16    1.31
  -6   8  -3    5.48    0.70
  -6   8  -3    6.70    1.49
   6  -8   3    5.87    0.65
  -7   8  -3    8.44    0.77
  -7   8  -3    6.78    1.77
  -7   8  -3    6.72    0.62
  -7   8  -3    6.34    1.36
  -7   8  -3    8.63    0.86
  -7   8  -3    7.48    1.71
   7  -8   3    6.52    0.69
  -8   8  -3   18.32    2.08
  -8   8  -3   19.63    1.11
  -8   8  -3   18.10    2.45
   8  -8   3   20.80    1.11
  -8  -7   3    0.19    0.87
  -8  -7   3    0.00    0.83
  -7  -7   3   15.15    1.45
  -7  -7   3   14.32    1.40
  -6  -7   3   38.27    2.04
  -6  -7   3   34.13    1.92
  -5  -7   3    2.53    0.83
  -5  -7   3    2.27    0.79
   4   7  -3   35.19    1.70
  -4  -7   3   37.42    1.89
  -4  -7   3   34.22    1.78
   3   7  -3   33.19    1.57
  -3  -7   3   33.73    1.61
  -3  -7   3   32.57    1.72
   2   7  -3   14.41    1.10
   2   7  -3   16.05    1.01
  -2  -7   3   14.59    1.14
  -2  -7   3   15.51    0.99
  -2  -7   3   14.98    1.06
   1   7  -3  145.77    4.53
   1   7  -3  143.64    4.28
   1   7  -3  147.16    4.29
  -1  -7   3  144.59    4.52
  -1  -7   3  141.64    5.19
   0   7  -3   19.61    1.04
   0   7  -3   21.84    1.22
   0   7  -3   16.46    1.09
   0  -7   3   18.19    1.14
   0  -7   3   20.02    1.28
  -1   7  -3  273.00    8.09
  -1   7  -3  288.72    8.18
  -1   7  -3  274.83   10.44
  -1   7  -3  284.66    8.75
   1  -7   3  273.29    9.27
   1  -7   3  271.27    8.02
  -2   7  -3   14.66    1.16
  -2   7  -3   14.91    1.07
  -2   7  -3   13.88    1.63
  -2   7  -3   15.71    1.06
  -2   7  -3   16.76    0.89
   2  -7   3   17.14    0.92
  -3   7  -3   96.35    3.17
  -3   7  -3   96.21    3.60
  -3   7  -3  102.81    2.84
  -3   7  -3   94.03    4.35
  -3   7  -3   98.89    3.11
  -3   7  -3   94.10    3.17
   3  -7   3   96.29    2.79
  -4   7  -3   22.19    1.51
  -4   7  -3   22.38    1.24
  -4   7  -3   21.38    0.98
  -4   7  -3   19.76    1.91
  -4   7  -3   21.13    1.15
  -4   7  -3   20.32    1.14
   4  -7   3   21.38    0.97
   4  -7   3   21.25    1.08
  -5   7  -3   -1.74    0.97
  -5   7  -3   -0.52    0.79
  -5   7  -3    0.27    0.47
  -5   7  -3    0.18    0.54
  -5   7  -3   -0.42    0.46
  -5   7  -3   -0.35    0.49
  -5   7  -3    0.25    0.94
  -5   7  -3   -0.02    0.40
   5  -7   3    0.28    0.40
   5  -7   3    0.15    0.45
  -6   7  -3   21.95    1.13
  -6   7  -3   17.75    2.12
  -6   7  -3   21.45    1.17
  -6   7  -3   19.41    1.75
  -6   7  -3   21.56    2.20
  -6   7  -3   21.19    1.04
  -6   7  -3   22.52    1.12
   6  -7   3   21.77    0.99
  -7   7  -3    8.36    1.71
  -7   7  -3    6.38    1.68
  -7   7  -3    6.19    0.72
  -7   7  -3    8.50    0.69
  -7   7  -3    7.48    0.76
  -7   7  -3    8.76    1.43
  -7   7  -3    6.50    0.54
   7  -7   3    6.08    0.62
   7  -7   3    8.01    0.74
  -8   7  -3    7.30    0.75
  -8   7  -3    6.46    1.51
  -8   7  -3    9.13    0.74
  -8   7  -3    7.78    0.78
  -8   7  -3    7.27    1.79
   8  -7   3    8.45    0.68
  -9   7  -3    2.53    1.45
   9  -7   3    3.85    0.58
  -9  -6   3   -0.63    0.79
  -9  -6   3    1.18    0.90
  -8  -6   3   26.87    1.71
  -8  -6   3   26.92    1.67
  -7  -6   3    6.05    0.99
  -7  -6   3    5.20    0.96
  -6  -6   3   46.46    2.47
  -6  -6   3   53.19    2.29
  -6  -6   3   50.87    2.23
  -5  -6   3   43.27    2.10
  -5  -6   3   43.42    2.01
  -5  -6   3   40.94    1.94
   4   6  -3   32.05    1.48
  -4  -6   3   28.57    1.47
  -4  -6   3   31.59    1.62
  -4  -6   3   33.00    1.63
   3   6  -3  139.22    4.32
  -3  -6   3  135.89    4.13
  -3  -6   3  139.63    4.97
  -3  -6   3  139.04    4.42
  -3  -6   3  137.73    4.37
   2   6  -3   17.62    0.99
   2   6  -3   18.67    1.09
   2   6  -3   16.41    0.97
  -2  -6   3   21.83    1.22
  -2  -6   3   18.46    0.99
  -2  -6   3   16.78    1.15
  -2  -6   3   17.77    1.16
   1   6  -3   75.97    2.43
   1   6  -3   72.58    2.40
   1   6  -3   76.12    2.56
   1   6  -3   74.27    2.55
  -1  -6   3   71.75    2.89
  -1  -6   3   79.50    2.61
  -1  -6   3   72.67    2.42
   0   6  -3   19.98    1.05
   0   6  -3   17.71    0.95
   0   6  -3   17.37    1.11
   0   6  -3   16.39    0.91
   0  -6   3   18.44    1.17
   0  -6   3   15.77    0.99
   0  -6   3   17.48    0.93
   0  -6   3   17.11    1.11
  -1   6  -3   11.60    0.86
  -1   6  -3   10.12    0.78
  -1   6  -3    9.95    0.66
  -1   6  -3   11.82    0.85
  -1   6  -3   10.62    0.71
  -1   6  -3    9.78    0.71
   1  -6   3   10.21    0.90
   1  -6   3   12.33    0.98
   1  -6   3   11.53    0.79
   1  -6   3   10.16    0.65
   1  -6   3   10.85    0.74
  -2   6  -3    2.12    0.59
  -2   6  -3    1.13    0.90
  -2   6  -3    1.73    0.38
  -2   6  -3    1.71    0.46
  -2   6  -3    3.01    0.50
   2  -6   3    2.05    0.52
   2  -6   3    1.93    0.38
   2  -6   3    2.67    0.45
  -3   6  -3   53.66    1.67
  -3   6  -3   53.26    1.86
  -3   6  -3   52.85    1.76
  -3   6  -3   52.85    1.95
  -3   6  -3   50.33    2.76
  -3   6  -3   50.01    1.91
  -3   6  -3   53.64    2.22
   3  -6   3   57.17    1.71
   3  -6   3   49.95    2.15
   3  -6   3   51.65    1.62
  -4   6  -3    0.15    0.42
  -4   6  -3    1.10    0.49
  -4   6  -3    0.59    0.33
  -4   6  -3   -0.37    0.63
  -4   6  -3    1.16    0.44
  -4   6  -3    0.70    0.90
   4  -6   3   -0.18    0.39
   4  -6   3    0.59    0.32
  -5   6  -3   67.24    3.54
  -5   6  -3   67.47    2.95
  -5   6  -3   70.17    2.17
  -5   6  -3   74.82    3.47
  -5   6  -3   63.87    2.29
  -5   6  -3   68.90    2.05
   5  -6   3   68.31    2.11
   5  -6   3   69.58    1.99
  -6   6  -3    0.09    0.89
  -6   6  -3    0.12    0.38
  -6   6  -3    0.78    1.12
  -6   6  -3    0.03    0.48
  -6   6  -3    0.43    0.43
  -6   6  -3    2.08    1.15
   6  -6   3    0.01    0.32
   6  -6   3    1.14    0.48
  -7   6  -3   18.93    0.95
  -7   6  -3   18.91    0.85
  -7   6  -3   19.19    1.80
  -7   6  -3   18.89    2.11
  -7   6  -3   20.78    1.07
  -7   6  -3   17.97    2.15
   7  -6   3   18.41    0.87
   7  -6   3   17.10    1.05
  -8   6  -3   -1.00    1.21
  -8   6  -3   -0.73    1.33
  -8   6  -3   -0.31    0.43
  -8   6  -3   -0.16    0.48
  -8   6  -3    0.16    0.52
  -8   6  -3    0.39    1.17
   8  -6   3   -0.09    0.39
   8  -6   3   -0.04    0.50
  -9   6  -3    2.77    1.41
  -9   6  -3    2.14    0.49
  -9   6  -3    2.27    1.53
   9  -6   3    1.04    0.48
  -9  -5   3    0.15    0.78
  -8  -5   3    0.60    0.67
  -8  -5   3   -0.57    0.90
  -8  -5   3   -0.19    0.72
  -7  -5   3    0.15    0.69
  -7  -5   3    0.04    0.84
  -7  -5   3    0.19    0.72
  -6  -5   3   28.54    1.57
  -6  -5   3   27.82    1.79
  -6  -5   3   31.73    1.63
  -5  -5   3   11.06    1.05
  -5  -5   3   10.15    0.93
  -5  -5   3    8.73    0.86
  -4  -5   3   58.61    2.32
  -4  -5   3   56.02    2.15
  -4  -5   3   60.92    2.21
   3   5  -3    4.91    0.60
   3   5  -3    6.57    0.81
   3   5  -3    6.63    0.67
  -3  -5   3    6.58    0.72
  -3  -5   3    7.32    0.70
  -3  -5   3    6.47    0.68
  -3  -5   3    6.57    0.64
  -3  -5   3    6.44    0.72
   2   5  -3   48.36    2.00
   2   5  -3   47.73    1.66
   2   5  -3   44.06    1.63
   2   5  -3   45.55    1.78
  -2  -5   3   47.07    1.97
  -2  -5   3   44.36    1.74
  -2  -5   3   45.59    1.64
  -2  -5   3   47.15    1.77
   1   5  -3   36.24    1.36
   1   5  -3   35.66    1.67
   1   5  -3   38.37    1.48
   1   5  -3   34.57    1.35
   1   5  -3   38.50    1.46
  -1  -5   3   36.39    1.36
  -1  -5   3   37.31    1.45
  -1  -5   3   36.79    1.63
  -1  -5   3   35.94    1.63
   0   5  -3   47.15    1.71
   0   5  -3   47.25    1.76
   0   5  -3   46.75    1.49
   0   5  -3   46.95    1.92
   0   5  -3   45.65    1.59
   0   5  -3   51.26    1.65
   0  -5   3   47.03    1.60
   0  -5   3   48.53    1.95
   0  -5   3   47.16    1.69
   0  -5   3   46.19    1.93
  -1   5  -3  161.11    4.54
  -1   5  -3  160.38    5.49
  -1   5  -3  168.20    4.56
  -1   5  -3  165.61    4.86
  -1   5  -3  166.97    4.36
  -1   5  -3  164.27    4.85
   1  -5   3  150.53    5.51
   1  -5   3  163.15    4.80
   1  -5   3  163.20    4.55
   1  -5   3  168.13    4.29
   1  -5   3  169.00    5.54
  -2   5  -3   65.44    2.21
  -2   5  -3   66.79    2.05
  -2   5  -3   63.21    3.12
  -2   5  -3   61.33    2.18
  -2   5  -3   69.04    2.50
  -2   5  -3   64.73    1.91
  -2   5  -3   66.86    2.01
  -2   5  -3   65.00    2.03
   2  -5   3   68.10    1.90
   2  -5   3   64.57    2.03
   2  -5   3   65.93    2.47
   2  -5   3   66.05    1.97
   2  -5   3   65.11    2.47
  -3   5  -3   36.47    1.45
  -3   5  -3   35.10    1.72
  -3   5  -3   35.92    1.18
  -3   5  -3   35.63    1.29
  -3   5  -3   38.20    2.17
  -3   5  -3   33.26    1.39
  -3   5  -3   36.89    1.31
   3  -5   3   36.83    1.58
   3  -5   3   36.81    1.16
   3  -5   3   37.20    1.27
  -4   5  -3  144.68    5.56
  -4   5  -3  150.29    4.35
  -4   5  -3  137.81    5.02
  -4   5  -3  142.87    3.98
  -4   5  -3  146.47    5.87
  -4   5  -3  141.79    4.34
  -4   5  -3  145.80    3.86
   4  -5   3  149.71    4.97
   4  -5   3  148.37    3.88
  -5   5  -3   26.56    1.20
  -5   5  -3   24.18    1.93
  -5   5  -3   27.85    1.12
  -5   5  -3   23.37    1.61
  -5   5  -3   24.18    1.10
  -5   5  -3   24.38    2.06
  -5   5  -3   27.49    0.97
   5  -5   3   24.57    0.87
   5  -5   3   26.07    1.04
  -6   5  -3   24.11    1.11
  -6   5  -3   23.46    1.74
  -6   5  -3   24.47    2.14
  -6   5  -3   22.27    2.07
  -6   5  -3   23.16    1.04
  -6   5  -3   23.16    0.94
   6  -5   3   22.04    0.84
   6  -5   3   23.99    0.96
  -7   5  -3   35.20    1.23
  -7   5  -3   37.55    2.83
  -7   5  -3   32.75    2.25
  -7   5  -3   33.15    2.53
  -7   5  -3   35.29    1.41
  -7   5  -3   35.64    1.25
   7  -5   3   35.37    1.17
  -8   5  -3    1.23    1.07
  -8   5  -3    0.59    0.47
  -8   5  -3    0.88    0.58
  -8   5  -3    0.03    1.30
  -8   5  -3    1.70    1.27
   8  -5   3    1.05    0.40
   8  -5   3    0.91    0.50
  -9   5  -3   22.82    2.53
  -9  -4   3    0.85    0.73
  -8  -4   3   13.67    1.17
  -8  -4   3   12.40    1.49
  -8  -4   3   16.09    1.28
  -7  -4   3   19.49    1.66
  -7  -4   3   19.89    1.34
  -7  -4   3   20.07    1.33
   6   4  -3   45.54    1.65
  -6  -4   3   48.12    1.95
  -6  -4   3   46.09    1.90
  -6  -4   3   43.00    2.22
   5   4  -3   19.75    0.95
  -5  -4   3   19.93    1.35
  -5  -4   3   19.27    1.18
  -5  -4   3   18.56    1.16
   4   4  -3    1.01    0.34
  -4  -4   3    1.00    0.50
  -4  -4   3    0.58    0.45
  -4  -4   3    0.79    0.46
  -4  -4   3    0.84    0.37
   3   4  -3   23.67    1.12
   3   4  -3   21.91    1.25
   3   4  -3   23.87    1.05
   3   4  -3   24.59    0.98
   3   4  -3   23.42    1.05
   3   4  -3   21.76    1.21
  -3  -4   3   22.79    1.19
  -3  -4   3   23.31    1.05
  -3  -4   3   24.44    1.14
  -3  -4   3   21.57    0.99
  -3  -4   3   21.50    1.17
  -3  -4   3   22.79    1.19
   2   4  -3  253.72    8.14
   2   4  -3  241.23    8.13
   2   4  -3  253.51    6.70
   2   4  -3  250.69    7.09
   2   4  -3  247.32    6.68
  -2  -4   3  249.93    7.15
  -2  -4   3  245.44    7.09
  -2  -4   3  253.29    8.12
  -2  -4   3  230.02    8.09
  -2  -4   3  247.38    6.70
   1   4  -3   25.88    1.21
   1   4  -3   25.76    0.98
   1   4  -3   26.16    1.12
   1   4  -3   24.32    1.18
   1   4  -3   24.94    0.99
  -1  -4   3   24.30    1.16
  -1  -4   3   24.24    1.18
  -1  -4   3   22.50    0.96
  -1  -4   3   25.38    1.05
   0   4  -3  767.31   19.20
   0   4  -3  769.51   24.09
   0   4  -3  770.73   21.24
   0   4  -3  759.61   19.79
   0   4  -3  751.49   24.10
   0   4  -3  761.77   21.09
   0   4  -3  757.87   19.79
   0  -4   3  775.44   24.11
   0  -4   3  729.74   19.78
   0  -4   3  786.06   21.07
  -1   4  -3   14.94    0.74
  -1   4  -3   14.68    0.69
  -1   4  -3   15.96    0.88
  -1   4  -3   14.48    0.83
  -1   4  -3   13.98    0.65
  -1   4  -3   14.60    0.76
  -1   4  -3   14.66    0.71
   1  -4   3   14.91    0.84
   1  -4   3   14.77    0.71
   1  -4   3   13.83    0.66
   1  -4   3   13.89    0.82
  -2   4  -3  409.38   10.23
  -2   4  -3  385.49   14.21
  -2   4  -3  399.99   10.32
  -2   4  -3  400.01   12.47
  -2   4  -3  399.45   11.37
  -2   4  -3  391.76   10.59
  -2   4  -3  410.86   11.30
   2  -4   3  418.11   10.05
   2  -4   3  418.55   12.90
   2  -4   3  414.07   10.59
   2  -4   3  397.43   10.12
   2  -4   3  393.19   12.90
  -3   4  -3   32.45    1.57
  -3   4  -3   31.13    1.09
  -3   4  -3   28.61    1.86
  -3   4  -3   29.73    1.20
  -3   4  -3   31.98    1.14
  -3   4  -3   30.62    1.02
  -3   4  -3   30.15    1.15
  -3   4  -3   30.20    1.27
   3  -4   3   28.24    0.96
   3  -4   3   31.85    1.39
   3  -4   3   30.59    1.37
   3  -4   3   30.89    1.11
   3  -4   3   33.02    1.09
  -4   4  -3   78.35    2.57
  -4   4  -3   83.48    2.25
  -4   4  -3   81.30    3.73
  -4   4  -3   82.02    2.41
  -4   4  -3   81.98    2.36
  -4   4  -3   85.05    2.61
  -4   4  -3   74.85    3.47
  -4   4  -3   79.98    3.12
   4  -4   3   87.55    2.98
  -5   4  -3   52.81    1.78
  -5   4  -3   51.07    1.57
  -5   4  -3   46.31    2.25
  -5   4  -3   52.31    2.81
  -5   4  -3   50.85    2.67
  -5   4  -3   48.11    1.72
  -5   4  -3   48.71    1.46
   5  -4   3   48.92    1.37
  -6   4  -3    1.63    0.42
  -6   4  -3    1.70    1.10
  -6   4  -3    2.62    1.05
  -6   4  -3    1.35    0.82
  -6   4  -3    1.20    0.41
  -6   4  -3    0.98    0.34
   6  -4   3    1.16    0.26
  -7   4  -3   34.54    1.28
  -7   4  -3   31.01    2.53
  -7   4  -3   32.76    2.60
  -7   4  -3   34.59    2.27
  -7   4  -3   34.82    1.23
  -7   4  -3   33.06    1.22
   7  -4   3   32.97    1.09
  -8   4  -3   15.28    1.79
  -8   4  -3   13.71    1.90
  -8   4  -3   13.95    0.89
  -8   4  -3   15.61    2.06
  -8   4  -3   14.20    0.94
   8  -4   3   11.65    0.74
  -9   4  -3    2.39    0.65
  -9   4  -3    1.60    1.49
   9  -4   3    1.95    0.51
 -10  -3   3    0.73    0.65
  -9  -3   3   28.84    1.49
   8   3  -3    1.35    0.55
  -8  -3   3    1.26    0.62
  -8  -3   3    2.00    1.01
  -8  -3   3    1.92    0.66
   7   3  -3   75.12    2.39
  -7  -3   3   76.27    3.34
  -7  -3   3   73.78    2.74
  -7  -3   3   85.32    2.81
  -7  -3   3   83.34    2.70
   6   3  -3   24.39    1.12
   6   3  -3   21.95    1.00
  -6  -3   3   23.43    1.08
  -6  -3   3   21.09    1.15
  -6  -3   3   22.90    1.21
  -6  -3   3   23.12    1.60
  -6  -3   3   24.04    1.18
   5   3  -3   49.90    1.62
   5   3  -3   49.42    1.55
  -5  -3   3   48.30    1.83
  -5  -3   3   49.66    1.74
  -5  -3   3   46.24    1.60
  -5  -3   3   48.67    2.14
  -5  -3   3   47.86    1.81
   4   3  -3  190.94    6.58
   4   3  -3  197.17    5.39
   4   3  -3  193.16    5.11
   4   3  -3  193.04    5.08
   4   3  -3  192.28    5.39
   4   3  -3  198.21    6.58
  -4  -3   3  201.45    6.47
  -4  -3   3  192.01    5.74
  -4  -3   3  197.97    5.58
  -4  -3   3  200.95    6.43
  -4  -3   3  194.55    5.78
  -4  -3   3  196.96    5.39
  -4  -3   3  195.04    5.19
  -4  -3   3  205.43    6.38
   3   3  -3   17.43    0.82
   3   3  -3   16.50    0.78
   3   3  -3   17.14    0.77
   3   3  -3   16.48    0.95
   3   3  -3   16.33    0.97
   3   3  -3   15.74    0.77
  -3  -3   3   16.46    0.93
  -3  -3   3   17.01    0.78
  -3  -3   3   17.55    0.93
  -3  -3   3   17.86    0.98
  -3  -3   3   16.14    0.91
  -3  -3   3   18.14    0.77
  -3  -3   3   15.70    0.85
   2   3  -3  654.56   22.04
   2   3  -3  716.44   22.06
   2   3  -3  688.69   18.10
   2   3  -3  698.29   19.26
  -2  -3   3  710.18   18.10
  -2  -3   3  689.16   22.02
  -2  -3   3  707.20   19.42
  -2  -3   3  695.77   19.27
  -2  -3   3  714.81   22.04
   1   3  -3    9.70    0.66
   1   3  -3    9.43    0.70
   1   3  -3   11.03    0.60
   1   3  -3   11.50    0.72
  -1  -3   3   10.59    0.58
  -1  -3   3   10.40    0.65
  -1  -3   3   10.92    0.70
  -1  -3   3   11.48    0.76
   0   3  -3  292.23    9.43
   0   3  -3  299.24    8.26
   0   3  -3  296.38    9.42
   0   3  -3  291.94    7.48
   0   3  -3  291.72    7.74
   0  -3   3  281.52    9.42
   0  -3   3  287.54    7.74
   0  -3   3  301.91    9.43
  -1   3  -3    9.14    0.61
  -1   3  -3   10.96    0.62
  -1   3  -3    9.09    0.52
  -1   3  -3    9.51    0.54
  -1   3  -3    9.94    0.61
  -1   3  -3    9.18    0.62
   1  -3   3    8.22    0.65
   1  -3   3    9.48    0.52
   1  -3   3    8.94    0.50
   1  -3   3    9.94    0.65
  -2   3  -3   32.09    1.03
  -2   3  -3   34.72    1.47
  -2   3  -3   33.88    1.27
  -2   3  -3   34.82    1.26
  -2   3  -3   34.35    1.16
  -2   3  -3   32.22    1.15
  -2   3  -3   31.89    1.86
   2  -3   3   35.20    1.39
   2  -3   3   33.03    1.40
   2  -3   3   33.66    1.00
   2  -3   3   34.44    1.13
   2  -3   3   31.85    1.09
  -3   3  -3    8.57    0.82
  -3   3  -3    8.50    1.01
  -3   3  -3    7.89    0.48
  -3   3  -3    8.07    0.50
  -3   3  -3    7.79    0.63
  -3   3  -3    7.97    0.58
  -3   3  -3    7.85    0.80
  -3   3  -3    9.36    1.02
  -3   3  -3    7.75    0.59
   3  -3   3    8.29    0.50
   3  -3   3    8.47    0.70
   3  -3   3    8.12    0.41
   3  -3   3    8.01    0.64
  -4   3  -3  185.72    6.21
  -4   3  -3  183.34    4.78
  -4   3  -3  196.44    5.42
  -4   3  -3  194.02    5.00
  -4   3  -3  178.07    6.17
  -4   3  -3  187.84    4.81
  -4   3  -3  178.63    6.53
  -4   3  -3  184.10    7.02
  -4   3  -3  186.04    5.42
   4  -3   3  185.31    4.97
   4  -3   3  182.29    4.64
  -5   3  -3    5.26    1.05
  -5   3  -3    5.30    0.85
  -5   3  -3    5.24    0.41
  -5   3  -3    6.93    0.95
  -5   3  -3    5.41    0.56
  -5   3  -3    5.76    0.61
  -5   3  -3    6.03    0.30
  -5   3  -3    5.30    1.03
  -5   3  -3    5.73    0.40
   5  -3   3    6.01    0.35
  -6   3  -3   53.07    1.63
  -6   3  -3   56.26    3.00
  -6   3  -3   55.28    1.63
  -6   3  -3   55.50    1.89
  -6   3  -3   52.97    2.58
  -6   3  -3   59.77    2.78
  -6   3  -3   51.06    2.99
   6  -3   3   52.14    1.50
  -7   3  -3    4.80    0.53
  -7   3  -3    4.55    0.53
  -7   3  -3    3.80    0.49
  -7   3  -3    3.50    1.08
  -7   3  -3    5.58    1.34
  -7   3  -3    3.40    1.21
   7  -3   3    3.49    0.40
  -8   3  -3    3.57    1.43
  -8   3  -3    3.24    0.55
  -8   3  -3    2.04    0.59
   8  -3   3    2.34    0.46
  -9   3  -3    0.00    1.31
  -9   3  -3    1.18    0.65
  -9   3  -3    0.56    0.56
   9  -3   3    1.04    0.53
  10   2  -3    0.50    0.58
   9   2  -3   12.53    0.91
  -9  -2   3   10.74    0.89
  -9  -2   3   12.73    0.98
   8   2  -3    2.82    0.58
   8   2  -3    4.27    0.60
  -8  -2   3    4.04    0.62
  -8  -2   3    4.64    0.67
  -8  -2   3    3.53    0.64
   7   2  -3    1.74    0.42
   7   2  -3    2.45    0.50
  -7  -2   3    2.62    0.50
  -7  -2   3    2.93    0.95
  -7  -2   3    3.26    0.57
  -7  -2   3    4.23    0.66
  -7  -2   3    2.18    0.55
   6   2  -3   36.24    1.30
   6   2  -3   36.59    1.22
  -6  -2   3   33.61    1.47
  -6  -2   3   37.22    1.31
  -6  -2   3   38.71    1.98
  -6  -2   3   37.78    1.43
  -6  -2   3   36.82    1.51
   5   2  -3   98.00    2.69
   5   2  -3   95.96    3.50
   5   2  -3   97.68    2.64
  -5  -2   3   96.64    3.08
  -5  -2   3   97.26    2.94
  -5  -2   3  102.15    3.60
  -5  -2   3   99.06    3.08
  -5  -2   3   96.78    2.73
   4   2  -3    0.65    0.31
   4   2  -3    0.54    0.30
   4   2  -3    0.69    0.42
   4   2  -3    0.62    0.27
   4   2  -3    0.64    0.32
   4   2  -3    1.37    0.41
  -4  -2   3    0.80    0.32
  -4  -2   3    0.14    0.09
  -4  -2   3    0.61    0.34
  -4  -2   3    0.92    0.35
  -4  -2   3    1.41    0.40
  -4  -2   3    1.96    0.36
  -4  -2   3    1.02    0.28
  -4  -2   3    0.88    0.49
   3   2  -3  253.79    6.86
   3   2  -3  259.80    6.49
   3   2  -3  260.16    8.35
   3   2  -3  257.18    6.86
   3   2  -3  253.85    6.52
   3   2  -3  244.96    8.35
  -3  -2   3  266.74    8.32
  -3  -2   3  258.53    6.86
  -3  -2   3  249.31    6.62
  -3  -2   3  265.15    7.36
  -3  -2   3  264.47    8.07
  -3  -2   3  260.38    7.30
   2   2  -3    5.99    0.54
   2   2  -3    6.98    0.40
   2   2  -3    5.72    0.45
   2   2  -3    6.76    0.56
  -2  -2   3    6.97    0.45
  -2  -2   3    7.27    0.53
  -2  -2   3    7.07    0.57
  -2  -2   3    6.59    0.42
  -2  -2   3    6.75    0.48
  -2  -2   3    7.10    0.54
   1   2  -3  136.03    4.40
   1   2  -3  125.57    4.38
   1   2  -3  129.64    3.61
  -1  -2   3  128.10    4.38
  -1  -2   3  134.64    3.61
  -1  -2   3  131.36    3.83
  -1  -2   3  134.06    4.38
  -1  -2   3  136.50    3.49
   0   2  -3    4.36    0.46
   0   2  -3    5.91    0.50
   0   2  -3    4.82    0.38
   0  -2   3    6.34    0.52
   0  -2   3    4.77    0.38
   0  -2   3    4.85    0.45
  -1   2  -3  207.56    5.91
  -1   2  -3  196.59    5.37
  -1   2  -3  210.81    5.53
  -1   2  -3  216.17    5.94
  -1   2  -3  208.54    6.66
  -1   2  -3  188.30    7.40
  -1   2  -3  208.43    5.30
   1  -2   3  203.79    6.73
   1  -2   3  213.78    5.21
   1  -2   3  219.11    6.71
   1  -2   3  196.99    5.49
  -2   2  -3  156.64    5.35
  -2   2  -3  154.43    4.12
  -2   2  -3  155.26    4.30
  -2   2  -3  159.88    5.09
  -2   2  -3  158.87    4.60
  -2   2  -3  154.16    4.07
  -2   2  -3  158.06    5.79
   2  -2   3  158.02    4.26
   2  -2   3  157.89    5.18
   2  -2   3  160.06    3.98
  -3   2  -3  133.67    3.73
  -3   2  -3  141.44    4.55
  -3   2  -3  135.20    3.53
  -3   2  -3  128.70    4.81
  -3   2  -3  134.87    5.13
  -3   2  -3  131.26    4.52
  -3   2  -3  136.60    4.05
  -3   2  -3  136.24    3.52
   3  -2   3  136.11    3.70
   3  -2   3  134.33    3.42
   3  -2   3  138.01    4.55
  -4   2  -3   18.52    0.71
  -4   2  -3   18.89    1.37
  -4   2  -3   18.70    1.50
  -4   2  -3   18.09    1.21
  -4   2  -3   19.80    0.78
  -4   2  -3   17.80    1.44
  -4   2  -3   20.11    1.07
  -4   2  -3   19.44    0.71
   4  -2   3   19.64    0.77
   4  -2   3   18.91    0.62
   4  -2   3   20.01    0.81
  -5   2  -3   13.80    0.64
  -5   2  -3   15.60    0.59
  -5   2  -3   15.95    1.05
  -5   2  -3   16.01    1.48
  -5   2  -3   15.10    0.69
  -5   2  -3   14.58    1.28
  -5   2  -3   14.54    1.42
  -5   2  -3   14.47    1.25
   5  -2   3   14.14    0.57
  -6   2  -3   23.13    1.94
  -6   2  -3   21.53    1.60
  -6   2  -3   21.13    0.85
  -6   2  -3   21.91    0.92
  -6   2  -3   19.70    1.72
  -6   2  -3   20.93    1.88
   6  -2   3   20.64    0.78
  -7   2  -3    6.69    1.45
  -7   2  -3    5.70    1.37
  -7   2  -3    6.85    0.57
  -7   2  -3    7.99    1.39
  -7   2  -3    7.13    1.23
  -7   2  -3    6.00    0.66
   7  -2   3    7.11    0.55
  -8   2  -3   53.87    1.94
  -8   2  -3   52.78    1.79
  -8   2  -3   53.00    1.83
  -8   2  -3   54.20    3.16
   8  -2   3   51.39    1.77
  -9   2  -3    2.19    0.72
  -9   2  -3    0.53    0.54
  -9   2  -3    3.63    1.50
   9  -2   3    2.05    0.62
  10   1  -3    0.43    0.51
   9   1  -3    9.90    0.77
  -9  -1   3   11.46    0.83
  -9  -1   3   14.66    0.91
   8   1  -3    0.25    0.41
   8   1  -3    0.65    0.38
  -8  -1   3    0.62    0.45
  -8  -1   3   -0.28    0.43
  -8  -1   3    0.02    0.42
   7   1  -3   47.61    1.53
   7   1  -3   48.98    1.47
  -7  -1   3   48.54    1.71
  -7  -1   3   45.53    1.73
  -7  -1   3   47.49    1.58
   6   1  -3   24.52    0.85
   6   1  -3   23.67    0.93
  -6  -1   3   25.55    1.14
  -6  -1   3   23.28    1.03
  -6  -1   3   26.07    0.97
  -6  -1   3   25.34    1.39
  -6  -1   3   24.29    1.09
   5   1  -3    5.04    0.38
   5   1  -3    5.61    0.43
   5   1  -3    5.74    0.33
   5   1  -3    6.68    0.62
  -5  -1   3    5.27    0.41
  -5  -1   3    5.55    0.45
  -5  -1   3    4.56    0.48
  -5  -1   3    6.75    0.54
  -5  -1   3    5.85    0.80
  -5  -1   3    7.75    0.76
   4   1  -3   57.85    1.74
   4   1  -3   59.32    1.62
   4   1  -3   57.60    2.16
   4   1  -3   61.24    2.15
   4   1  -3   58.30    1.57
   4   1  -3   59.89    1.76
  -4  -1   3   58.98    1.73
  -4  -1   3   57.71    1.69
  -4  -1   3   57.60    2.27
  -4  -1   3   56.52    1.90
  -4  -1   3   59.90    1.90
  -4  -1   3   57.63    1.81
   3   1  -3  153.95    3.94
   3   1  -3  155.78    4.19
   3   1  -3  158.37    5.09
   3   1  -3  150.64    5.11
   3   1  -3  157.14    3.91
  -3  -1   3  154.78    4.45
  -3  -1   3  155.62    4.97
  -3  -1   3  157.83    5.02
  -3  -1   3  156.73    4.99
  -3  -1   3  150.33    4.03
  -3  -1   3  152.87    4.48
   2   1  -3    7.00    0.59
   2   1  -3    7.58    0.56
   2   1  -3    7.85    0.42
   2   1  -3    7.32    0.47
  -2  -1   3    6.41    0.49
  -2  -1   3    7.64    0.56
  -2  -1   3    7.89    0.59
  -2  -1   3    7.01    0.47
  -2  -1   3    7.59    0.43
  -2  -1   3    7.96    0.49
   1   1  -3  310.14   10.47
   1   1  -3  337.67   10.47
   1   1  -3  333.76    8.60
  -1  -1   3  325.36    8.33
  -1  -1   3  330.03   10.47
  -1  -1   3  330.02   10.44
  -1  -1   3  321.85    8.59
  -1  -1   3  337.66    8.32
   0   1  -3    7.42    0.45
   0   1  -3    7.27    0.55
   0  -1   3    7.72    0.54
   0  -1   3    6.94    0.56
   0  -1   3    6.85    0.44
  -1   1  -3  287.38    8.87
  -1   1  -3  282.21    7.08
  -1   1  -3  272.64    9.65
  -1   1  -3  277.76    7.13
  -1   1  -3  271.42    7.35
  -1   1  -3  272.33    8.89
   1  -1   3  294.11    8.94
   1  -1   3  264.94    7.33
  -2   1  -3  193.97    6.84
  -2   1  -3  182.49    5.17
  -2   1  -3  189.23    4.94
  -2   1  -3  188.71    6.35
  -2   1  -3  190.67    4.94
  -2   1  -3  194.79    5.57
  -2   1  -3  195.39    5.55
  -2   1  -3  197.54    6.12
   2  -1   3  194.97    4.84
   2  -1   3  187.79    5.16
   2  -1   3  195.25    6.30
  -3   1  -3  289.40    8.94
  -3   1  -3  270.42    8.01
  -3   1  -3  265.84    9.17
  -3   1  -3  283.12    7.99
  -3   1  -3  279.76    7.17
  -3   1  -3  282.20    7.15
  -3   1  -3  279.91    7.43
  -3   1  -3  275.23    9.91
  -3   1  -3  275.93    8.86
  -3   1  -3  289.90    8.84
   3  -1   3  286.48    7.47
   3  -1   3  286.73    9.13
   3  -1   3  285.59    7.46
   3  -1   3  281.00    7.00
  -4   1  -3  155.12    5.39
  -4   1  -3  159.89    4.18
  -4   1  -3  170.98    4.75
  -4   1  -3  161.60    4.32
  -4   1  -3  160.96    4.15
  -4   1  -3  157.28    5.34
  -4   1  -3  155.11    5.98
  -4   1  -3  154.09    4.72
  -4   1  -3  151.00    5.62
   4  -1   3  165.86    5.41
   4  -1   3  157.46    4.05
   4  -1   3  157.94    4.34
   4  -1   3  157.07    4.37
  -5   1  -3    2.07    0.52
  -5   1  -3    3.59    0.60
  -5   1  -3    1.82    0.83
  -5   1  -3    4.22    0.83
  -5   1  -3    2.60    0.42
  -5   1  -3    2.63    0.85
  -5   1  -3    1.94    0.88
  -5   1  -3    2.70    0.36
   5  -1   3    2.80    0.32
  -6   1  -3  121.99    5.04
  -6   1  -3  111.31    4.50
  -6   1  -3  114.83    3.20
  -6   1  -3  116.08    3.30
  -6   1  -3  123.65    3.75
  -6   1  -3  111.27    4.73
  -6   1  -3  113.73    3.69
   6  -1   3  116.59    3.13
  -7   1  -3   11.63    1.61
  -7   1  -3   12.07    0.88
  -7   1  -3   12.01    1.69
  -7   1  -3   11.29    0.75
   7  -1   3   13.52    0.87
  -8   1  -3   19.21    1.19
  -8   1  -3   16.59    1.99
  -8   1  -3   18.06    1.00
  -8   1  -3   18.28    2.04
   8  -1   3   16.01    1.07
  -9   1  -3    0.10    0.69
  -9   1  -3    1.68    0.65
   9  -1   3    1.76    0.66
  10   0  -3   11.63    0.78
  10   0  -3   12.82    0.80
   9   0  -3   -0.21    0.38
   9   0  -3    0.46    0.42
  -9   0   3   -0.49    0.40
   8   0  -3   42.19    1.35
   8   0  -3   44.06    1.43
  -8   0   3   43.49    1.48
  -8   0   3   44.87    1.51
  -8   0   3   47.27    2.31
   7   0  -3    8.81    0.47
   7   0  -3    9.49    0.57
  -7   0   3   10.70    0.71
  -7   0   3   10.33    0.70
  -7   0   3   11.21    0.68
  -7   0   3    9.95    1.10
   6   0  -3   71.55    2.54
  -6   0   3   67.97    1.96
  -6   0   3   72.71    2.76
  -6   0   3   68.01    2.20
  -6   0   3   69.50    2.12
   5   0  -3  178.18    4.53
   5   0  -3  170.48    5.62
  -5   0   3  160.55    4.92
  -5   0   3  166.20    4.75
  -5   0   3  179.48    4.50
  -5   0   3  161.20    4.39
  -5   0   3  175.97    4.95
  -5   0   3  172.67    5.67
  -5   0   3  175.75    4.91
   4   0  -3   36.70    1.44
   4   0  -3   34.55    1.15
   4   0  -3   35.84    1.39
   4   0  -3   38.11    1.12
  -4   0   3   34.34    1.03
  -4   0   3   34.67    1.16
  -4   0   3   37.26    1.27
  -4   0   3   34.74    1.24
  -4   0   3   37.28    1.25
  -4   0   3   36.15    1.10
  -4   0   3   33.88    1.53
   3   0  -3  406.10   10.69
   3   0  -3  400.83   13.05
   3   0  -3  425.35   13.01
  -3   0   3  405.84   11.47
  -3   0   3  413.45   10.66
  -3   0   3  404.36   10.32
  -3   0   3  420.49   11.40
   2   0  -3    0.10    0.26
   2   0  -3    0.00    0.33
   2   0  -3    0.52    0.29
   2   0  -3    0.55    0.16
   2   0  -3    0.21    0.15
  -2   0   3    0.45    0.22
  -2   0   3    0.51    0.21
  -2   0   3    0.24    0.25
  -2   0   3    0.55    0.19
  -2   0   3    0.52    0.27
   1   0  -3   83.60    2.38
   1   0  -3   81.50    2.89
  -1   0   3   86.52    2.38
  -1   0   3   82.62    2.86
  -1   0   3   84.30    2.86
  -1   0   3   83.33    2.25
  -1   0   3   84.68    2.26
   0   0  -3    6.64    0.44
   0   0  -3    4.21    0.47
   0   0   3    4.84    0.48
   0   0   3    5.16    0.39
  -1   0  -3    4.19    0.45
  -1   0  -3    3.58    0.34
  -1   0  -3    3.94    0.35
  -1   0  -3    3.77    0.39
  -1   0  -3    4.29    0.51
   1   0   3    3.31    0.47
   1   0   3    3.56    0.37
  -2   0  -3  134.20    4.02
  -2   0  -3  136.09    3.59
  -2   0  -3  137.11    4.02
  -2   0  -3  133.63    4.55
  -2   0  -3  136.85    4.66
  -2   0  -3  133.64    3.63
  -2   0  -3  135.61    3.77
  -2   0  -3  136.32    4.91
   2   0   3  137.81    3.78
   2   0   3  134.66    3.77
   2   0   3  139.29    3.53
   2   0   3  144.00    4.64
  -3   0  -3   80.64    2.28
  -3   0  -3   80.91    3.20
  -3   0  -3   75.32    3.05
  -3   0  -3   79.88    2.35
  -3   0  -3   78.54    2.55
  -3   0  -3   79.26    2.54
  -3   0  -3   79.50    3.02
  -3   0  -3   80.23    2.75
  -3   0  -3   80.14    2.22
   3   0   3   82.57    2.39
   3   0   3   81.58    2.37
   3   0   3   83.15    2.20
   3   0   3   83.94    2.96
  -4   0  -3   41.36    2.16
  -4   0  -3   39.83    1.40
  -4   0  -3   42.98    1.36
  -4   0  -3   41.91    1.62
  -4   0  -3   44.27    1.64
  -4   0  -3   43.64    2.09
  -4   0  -3   42.14    2.16
  -4   0  -3   44.48    1.45
   4   0   3   45.24    1.49
   4   0   3   45.67    1.36
  -5   0  -3   86.06    3.71
  -5   0  -3   80.18    3.46
  -5   0  -3   83.57    2.39
  -5   0  -3   88.53    2.77
  -5   0  -3   85.89    2.50
  -5   0  -3   79.64    3.40
  -5   0  -3   79.49    2.73
   5   0   3   85.02    2.37
  -6   0  -3    0.95    0.51
  -6   0  -3    3.46    1.09
  -6   0  -3    1.24    0.41
  -6   0  -3    1.09    0.85
  -6   0  -3    1.62    0.57
  -6   0  -3    0.90    0.59
   6   0   3    1.12    0.43
  -7   0  -3   36.22    2.56
  -7   0  -3   33.56    1.62
  -7   0  -3   32.50    1.53
  -7   0  -3   33.29    2.46
  -7   0  -3   34.45    1.34
   7   0   3   34.50    1.43
  -8   0  -3    3.11    1.34
  -8   0  -3    3.81    0.78
   8   0   3    3.60    0.69
  -9   0  -3   -0.99    1.28
  -9   0  -3   -0.29    0.64
   9   0   3   -0.50    0.61
  10  -1  -3   18.00    0.88
  10  -1  -3   17.60    0.86
   9  -1  -3    2.36    0.36
   9  -1  -3    1.45    0.39
  -9   1   3    1.85    0.43
  -9   1   3    2.87    1.09
  -8   1   3    2.97    0.93
  -8   1   3    1.05    0.38
  -7   1   3   18.13    1.42
  -7   1   3   19.03    0.76
  -7   1   3   19.03    0.86
  -7   1   3   17.92    0.74
   6  -1  -3   40.86    1.55
  -6   1   3   38.00    1.31
  -6   1   3   39.67    1.91
   5  -1  -3   17.25    0.87
  -5   1   3   15.47    0.74
  -5   1   3   17.79    0.78
  -5   1   3   17.04    1.11
   4  -1  -3  107.21    3.67
   4  -1  -3  108.41    3.61
   4  -1  -3  107.62    2.94
  -4   1   3  109.20    3.76
  -4   1   3  104.20    3.20
  -4   1   3  111.16    3.20
  -4   1   3  108.21    2.89
  -4   1   3  112.53    2.91
  -4   1   3  108.83    3.62
   3  -1  -3   28.06    1.15
   3  -1  -3   26.84    0.92
   3  -1  -3   27.95    1.13
  -3   1   3   27.80    0.89
  -3   1   3   26.11    0.76
  -3   1   3   27.27    1.04
  -3   1   3   27.08    1.28
  -3   1   3   26.95    1.04
   2  -1  -3   84.53    2.18
   2  -1  -3   84.73    2.91
   2  -1  -3   83.81    2.19
   2  -1  -3   87.46    2.42
  -2   1   3   83.11    2.57
  -2   1   3   86.14    2.80
  -2   1   3   86.22    2.26
  -2   1   3   86.64    2.81
  -2   1   3   83.75    2.24
   1  -1  -3   14.15    0.77
   1  -1  -3   14.50    0.66
  -1   1   3   14.27    0.69
  -1   1   3   14.06    0.70
  -1   1   3   14.56    0.67
  -1   1   3   14.52    0.68
   0  -1  -3    0.08    0.25
   0  -1  -3    0.93    0.20
   0  -1  -3    1.03    0.34
   0   1   3    0.85    0.32
   0   1   3    0.73    0.26
   0   1   3    1.34    0.29
  -1  -1  -3  444.68   14.01
  -1  -1  -3  431.85   11.69
  -1  -1  -3  453.80   14.29
  -1  -1  -3  444.60   12.47
  -1  -1  -3  465.75   15.14
  -1  -1  -3  443.23   11.35
   1   1   3  446.43   11.71
   1   1   3  446.36   11.69
   1   1   3  453.31   14.28
  -2  -1  -3   30.43    1.01
  -2  -1  -3   28.86    1.17
  -2  -1  -3   31.50    1.09
  -2  -1  -3   32.21    1.53
  -2  -1  -3   31.89    1.21
  -2  -1  -3   30.84    1.36
  -2  -1  -3   28.67    1.34
  -2  -1  -3   29.95    1.48
  -2  -1  -3   30.15    1.08
   2   1   3   28.88    1.35
   2   1   3   29.10    1.07
   2   1   3   30.80    1.10
  -3  -1  -3  118.04    4.31
  -3  -1  -3  112.64    3.10
  -3  -1  -3  110.31    3.24
  -3  -1  -3  112.66    3.49
  -3  -1  -3  115.18    3.50
  -3  -1  -3  114.83    4.11
  -3  -1  -3  115.02    3.19
  -3  -1  -3  107.79    4.13
   3   1   3  114.86    3.28
   3   1   3  120.08    4.04
   3   1   3  116.67    3.09
   3   1   3  114.01    3.27
  -4  -1  -3   81.02    2.42
  -4  -1  -3   80.53    2.43
  -4  -1  -3   83.50    2.75
  -4  -1  -3   76.80    3.26
  -4  -1  -3   81.42    3.35
  -4  -1  -3   80.44    2.80
  -4  -1  -3   81.21    2.66
  -4  -1  -3   80.93    2.66
  -4  -1  -3   78.55    3.21
  -4  -1  -3   82.53    2.34
   4   1   3   83.25    2.33
  -5  -1  -3    8.16    1.11
  -5  -1  -3    7.10    0.70
  -5  -1  -3    9.16    0.80
  -5  -1  -3    6.53    1.05
  -5  -1  -3    7.54    0.68
  -5  -1  -3    7.22    0.57
   5   1   3    6.27    0.59
  -6  -1  -3   22.04    1.86
  -6  -1  -3   19.84    1.23
  -6  -1  -3   21.72    1.18
  -6  -1  -3   21.32    1.05
  -6  -1  -3   22.59    1.32
  -6  -1  -3   19.62    1.82
   6   1   3   22.85    1.14
  -7  -1  -3   51.16    2.10
  -7  -1  -3   46.49    2.80
  -7  -1  -3   45.97    2.04
  -7  -1  -3   47.92    1.91
   7   1   3   51.43    1.86
  -8  -1  -3    0.72    0.72
  -8  -1  -3   -0.04    0.66
  -8  -1  -3    0.53    1.26
   8   1   3    0.23    0.61
  -9  -1  -3   20.26    2.36
  10  -2  -3    2.32    0.37
 -10   2   3    2.72    1.17
  -9   2   3    1.90    1.01
  -9   2   3    1.49    0.38
  -8   2   3   24.72    1.77
  -7   2   3   23.85    1.63
   6  -2  -3   95.21    3.17
  -6   2   3   91.37    2.68
  -6   2   3   90.97    3.55
  -6   2   3   92.23    2.70
   5  -2  -3   11.08    0.77
  -5   2   3   10.63    0.79
  -5   2   3   10.42    0.63
  -5   2   3   10.95    1.04
  -5   2   3   10.25    0.63
   4  -2  -3    6.37    0.37
   4  -2  -3    5.50    0.52
  -4   2   3    6.89    0.79
  -4   2   3    6.20    0.32
  -4   2   3    6.69    0.50
  -4   2   3    6.03    0.34
  -4   2   3    6.94    0.51
  -4   2   3    6.52    0.55
  -4   2   3    5.92    0.48
   3  -2  -3   11.44    0.67
   3  -2  -3   11.25    0.52
  -3   2   3   10.70    0.85
  -3   2   3   10.84    0.45
  -3   2   3   11.03    0.50
  -3   2   3   11.94    0.59
  -3   2   3   11.38    0.61
  -3   2   3   11.71    0.67
   2  -2  -3  381.61   12.46
   2  -2  -3  389.80    9.74
   2  -2  -3  391.66    9.70
   2  -2  -3  402.50   10.24
  -2   2   3  406.32   10.98
  -2   2   3  389.37   12.36
  -2   2   3  401.35   10.89
  -2   2   3  394.72   10.23
  -2   2   3  386.65   12.41
  -2   2   3  389.44    9.88
  -2   2   3  381.17    9.94
   1  -2  -3   29.44    1.28
   1  -2  -3   30.03    1.06
  -1   2   3   30.65    1.22
  -1   2   3   32.96    1.16
  -1   2   3   30.64    1.10
  -1   2   3   29.59    1.05
  -1   2   3   29.86    1.10
  -1   2   3   31.53    0.99
  -1   2   3   31.67    1.06
   0  -2  -3  778.18   22.02
   0  -2  -3  782.50   25.17
   0  -2  -3  809.15   20.66
   0   2   3  767.28   20.64
   0   2   3  827.64   25.16
   0   2   3  800.55   21.99
   0   2   3  825.30   20.67
  -1  -2  -3   13.50    0.69
  -1  -2  -3   15.75    0.89
  -1  -2  -3   14.19    0.79
   1   2   3   14.30    0.70
   1   2   3   14.41    0.69
   1   2   3   14.21    0.86
   1   2   3   14.48    0.75
  -2  -2  -3  466.26   14.81
  -2  -2  -3  467.29   13.03
  -2  -2  -3  467.18   11.76
  -2  -2  -3  436.83   14.51
  -2  -2  -3  458.85   12.94
  -2  -2  -3  464.68   11.79
  -2  -2  -3  451.76   14.62
  -2  -2  -3  462.34   12.14
   2   2   3  465.93   12.14
   2   2   3  467.39   12.15
   2   2   3  460.73   12.90
   2   2   3  477.82   14.83
  -3  -2  -3   16.08    1.28
  -3  -2  -3   18.83    1.06
  -3  -2  -3   17.07    0.84
  -3  -2  -3   17.48    0.98
  -3  -2  -3   19.69    1.10
  -3  -2  -3   17.92    1.43
  -3  -2  -3   16.16    0.92
  -3  -2  -3   17.16    0.82
   3   2   3   17.86    0.89
   3   2   3   18.14    1.14
   3   2   3   17.68    0.87
   3   2   3   17.27    0.87
   3   2   3   18.02    0.98
  -4  -2  -3   49.68    2.34
  -4  -2  -3   48.20    1.87
  -4  -2  -3   51.35    1.63
  -4  -2  -3   49.34    2.49
  -4  -2  -3   49.52    1.70
  -4  -2  -3   48.79    1.87
   4   2   3   49.11    1.63
  -5  -2  -3  126.57    4.83
  -5  -2  -3  127.53    4.05
  -5  -2  -3  122.33    4.05
  -5  -2  -3  128.70    3.60
  -5  -2  -3  129.58    3.70
   5   2   3  128.82    3.58
  -6  -2  -3   -0.48    0.55
  -6  -2  -3    0.34    0.64
  -6  -2  -3    1.75    1.08
  -6  -2  -3    0.30    0.57
   6   2   3   -0.27    0.48
  -7  -2  -3   54.08    2.29
  -7  -2  -3   52.01    2.24
  -7  -2  -3   53.75    3.13
  -8  -2  -3    0.46    1.33
  -8  -2  -3    0.71    0.73
  -9  -2  -3    2.57    0.93
  -9  -2  -3    2.14    1.55
 -10   3   3    2.78    1.18
  -9   3   3   18.30    1.85
  -8   3   3    0.41    0.89
  -7   3   3   38.51    2.14
  -6   3   3   50.27    2.42
  -6   3   3   53.75    1.59
  -6   3   3   52.88    1.60
   5  -3  -3   33.10    1.34
  -5   3   3   30.24    1.19
  -5   3   3   32.22    1.13
  -5   3   3   30.08    1.70
   4  -3  -3  310.43    7.76
   4  -3  -3  301.93    9.54
  -4   3   3  298.58    8.34
  -4   3   3  303.92    7.73
  -4   3   3  302.09    9.41
  -4   3   3  286.28    9.50
  -4   3   3  280.89    7.50
  -4   3   3  276.79    8.39
  -4   3   3  305.72    7.76
  -4   3   3  304.93    8.40
  -4   3   3  301.36   10.48
   3  -3  -3    0.43    0.26
   3  -3  -3    0.39    0.17
   3  -3  -3    0.80    0.36
   3  -3  -3    0.71    0.21
  -3   3   3    0.95    0.36
  -3   3   3    0.68    0.51
  -3   3   3    0.74    0.26
  -3   3   3    0.86    0.30
  -3   3   3    0.61    0.41
  -3   3   3    0.72    0.31
  -3   3   3    0.54    0.30
  -3   3   3    0.71    0.32
   2  -3  -3  662.66   15.86
   2  -3  -3  642.53   16.63
   2  -3  -3  631.66   20.28
   2  -3  -3  616.16   15.95
  -2   3   3  652.05   20.16
  -2   3   3  657.58   21.71
  -2   3   3  603.03   16.20
  -2   3   3  646.68   16.12
  -2   3   3  637.02   16.64
  -2   3   3  637.99   17.84
  -2   3   3  637.48   16.62
  -2   3   3  658.33   19.65
  -2   3   3  657.65   17.73
   1  -3  -3    2.44    0.42
   1  -3  -3    2.64    0.36
   1  -3  -3    2.54    0.37
  -1   3   3    3.27    0.38
  -1   3   3    3.28    0.39
  -1   3   3    3.91    0.42
  -1   3   3    2.91    0.35
  -1   3   3    3.30    0.39
  -1   3   3    3.65    0.29
  -1   3   3    3.47    0.34
  -1   3   3    3.34    0.42
   0  -3  -3  191.52    5.22
   0  -3  -3  192.91    5.53
   0  -3  -3  184.54    6.31
   0  -3  -3  196.99    5.20
   0   3   3  185.32    5.00
   0   3   3  193.58    5.18
   0   3   3  189.11    6.29
   0   3   3  193.28    5.50
   0   3   3  186.15    5.19
  -1  -3  -3   35.15    1.25
  -1  -3  -3   34.22    1.40
  -1  -3  -3   35.29    1.28
  -1  -3  -3   33.34    1.50
  -1  -3  -3   34.48    1.40
   1   3   3   36.62    1.27
   1   3   3   33.48    1.51
   1   3   3   32.69    1.23
   1   3   3   32.26    1.33
  -2  -3  -3   63.23    2.25
  -2  -3  -3   63.73    2.52
  -2  -3  -3   67.11    2.27
  -2  -3  -3   68.32    2.03
  -2  -3  -3   62.26    2.06
  -2  -3  -3   63.75    2.10
   2   3   3   64.69    2.07
   2   3   3   63.95    2.08
   2   3   3   67.42    2.57
   2   3   3   64.62    2.19
  -3  -3  -3    7.75    0.75
  -3  -3  -3    8.78    0.68
  -3  -3  -3    8.49    1.12
  -3  -3  -3    7.66    0.81
  -3  -3  -3    9.16    0.76
  -3  -3  -3    9.29    0.70
  -3  -3  -3   10.40    0.78
   3   3   3   10.22    0.75
   3   3   3    9.06    0.71
   3   3   3    9.76    0.74
   3   3   3    7.91    0.84
  -4  -3  -3   91.58    3.97
  -4  -3  -3  103.64    3.30
  -4  -3  -3   98.67    3.28
  -5  -3  -3    0.89    0.96
  -5  -3  -3    1.07    0.57
  -5  -3  -3    1.31    0.60
  -6  -3  -3   33.67    1.71
  -6  -3  -3   33.54    1.76
  -6  -3  -3   33.54    2.30
  -7  -3  -3    1.75    0.82
  -7  -3  -3    1.30    0.78
  -7  -3  -3    2.03    1.21
  -8  -3  -3    1.65    0.87
  -8  -3  -3    0.04    0.80
  -8  -3  -3   -0.68    1.28
  -9  -3  -3    4.27    1.04
  -9  -3  -3    4.10    1.66
 -10   4   3    0.63    1.16
  -9   4   3    6.06    1.34
  -8   4   3   12.73    1.54
  -7   4   3   -0.03    0.84
  -6   4   3   50.93    1.73
  -6   4   3   54.24    2.54
  -6   4   3   54.45    1.65
   5  -4  -3   24.05    1.13
  -5   4   3   22.68    1.02
  -5   4   3   23.90    0.98
  -5   4   3   24.02    1.60
  -5   4   3   23.21    0.84
  -5   4   3   20.81    1.43
   4  -4  -3   15.28    0.61
   4  -4  -3   15.33    0.88
   4  -4  -3   14.21    0.53
  -4   4   3   14.82    0.74
  -4   4   3   15.64    0.62
  -4   4   3   15.59    0.78
  -4   4   3   14.69    0.80
  -4   4   3   13.15    1.07
  -4   4   3   13.24    1.14
   3  -4  -3   90.58    3.18
   3  -4  -3   88.42    2.39
   3  -4  -3   89.71    2.53
   3  -4  -3   89.52    2.58
  -3   4   3   90.23    3.43
  -3   4   3   87.13    2.77
  -3   4   3   90.26    2.77
  -3   4   3   86.75    3.26
  -3   4   3   89.02    2.56
  -3   4   3   90.52    2.61
  -3   4   3   91.54    2.56
   2  -4  -3   76.15    2.90
   2  -4  -3   84.63    2.41
   2  -4  -3   81.45    2.22
   2  -4  -3   78.13    2.40
  -2   4   3   82.85    2.99
  -2   4   3   79.18    2.39
  -2   4   3   76.12    2.51
  -2   4   3   84.48    2.35
  -2   4   3   82.75    2.79
  -2   4   3   80.86    2.55
  -2   4   3   77.68    2.26
  -2   4   3   82.60    2.96
  -2   4   3   77.08    2.37
   1  -4  -3   37.68    1.31
   1  -4  -3   35.18    1.31
   1  -4  -3   33.48    1.53
   1  -4  -3   35.14    1.40
  -1   4   3   35.40    1.21
  -1   4   3   35.76    1.27
  -1   4   3   34.54    1.26
  -1   4   3   36.03    1.50
  -1   4   3   35.07    1.38
  -1   4   3   34.93    1.24
  -1   4   3   36.10    1.35
  -1   4   3   34.79    1.33
   0  -4  -3  143.04    4.17
   0  -4  -3  148.65    4.41
   0  -4  -3  146.62    4.16
   0   4   3  147.65    4.13
   0   4   3  142.81    4.37
   0   4   3  150.16    4.42
   0   4   3  146.99    3.99
   0   4   3  147.42    4.16
   0   4   3  148.97    5.02
  -1  -4  -3   35.66    1.32
  -1  -4  -3   34.02    1.44
  -1  -4  -3   32.49    1.48
  -1  -4  -3   31.71    1.32
  -1  -4  -3   31.89    1.59
   1   4   3   35.37    1.41
   1   4   3   33.81    1.43
   1   4   3   33.78    1.28
   1   4   3   33.49    1.31
   1   4   3   33.31    1.57
  -2  -4  -3   67.50    2.30
  -2  -4  -3   70.60    2.45
  -2  -4  -3   64.84    2.25
  -2  -4  -3   70.91    2.77
  -2  -4  -3   72.28    2.46
   2   4   3   71.98    2.26
   2   4   3   72.08    2.79
   2   4   3   70.72    2.29
   2   4   3   68.30    2.36
  -3  -4  -3   58.91    2.19
  -3  -4  -3   59.67    2.25
  -3  -4  -3   58.19    2.48
  -3  -4  -3   53.36    2.90
  -3  -4  -3   61.50    2.12
   3   4   3   63.74    2.54
   3   4   3   56.64    2.13
  -4  -4  -3   11.31    1.01
  -4  -4  -3   11.54    1.48
  -4  -4  -3   12.35    1.01
  -5  -4  -3    0.87    0.98
  -5  -4  -3   -0.28    0.59
  -5  -4  -3    0.70    0.62
  -6  -4  -3   17.72    1.35
  -6  -4  -3   16.83    1.92
  -6  -4  -3   15.21    1.28
  -7  -4  -3    1.87    0.81
  -7  -4  -3   -0.57    1.23
  -7  -4  -3    1.47    0.86
  -8  -4  -3   32.69    1.96
  -8  -4  -3   29.17    1.86
  -8  -4  -3   31.74    2.85
  -9  -4  -3    2.57    1.03
  -9  -4  -3    0.89    1.54
  -9   5   3    6.72    1.44
  -8   5   3    1.00    0.31
  -8   5   3    0.89    1.04
  -7   5   3   32.60    1.18
  -7   5   3   36.06    2.19
  -6   5   3    1.71    0.43
  -6   5   3    1.66    0.46
  -6   5   3    2.71    0.89
   5  -5  -3    5.99    0.50
   5  -5  -3    6.95    0.44
  -5   5   3    6.06    0.91
  -5   5   3    6.41    0.56
  -5   5   3    7.60    1.06
  -5   5   3    6.92    0.60
  -5   5   3    6.76    0.56
   4  -5  -3    1.67    0.31
   4  -5  -3    0.71    0.46
  -4   5   3    1.45    0.41
  -4   5   3    1.52    0.60
  -4   5   3    1.54    0.38
  -4   5   3    1.27    0.39
  -4   5   3    1.22    0.62
   3  -5  -3   41.90    1.29
   3  -5  -3   42.65    1.76
  -3   5   3   38.70    1.52
  -3   5   3   38.86    1.86
  -3   5   3   40.69    1.33
  -3   5   3   43.08    1.56
  -3   5   3   38.64    1.37
  -3   5   3   38.66    1.85
   2  -5  -3    9.21    0.67
   2  -5  -3    8.44    0.66
   2  -5  -3    8.43    0.77
   2  -5  -3    9.08    0.58
  -2   5   3    8.04    0.90
  -2   5   3    8.14    0.63
  -2   5   3    9.43    0.70
  -2   5   3    7.92    0.59
  -2   5   3    8.48    0.67
  -2   5   3    8.23    0.61
  -2   5   3    8.05    0.58
  -2   5   3    9.16    0.70
   1  -5  -3  122.08    4.37
   1  -5  -3  118.71    3.81
   1  -5  -3  126.22    3.63
   1  -5  -3  124.53    3.60
  -1   5   3  116.98    3.78
  -1   5   3  124.95    3.83
  -1   5   3  125.49    3.58
  -1   5   3  123.53    3.58
  -1   5   3  122.12    3.46
  -1   5   3  124.67    3.43
  -1   5   3  127.53    4.24
   0  -5  -3    0.48    0.40
   0  -5  -3   -0.19    0.51
   0  -5  -3   -0.07    0.43
   0  -5  -3    0.35    0.41
   0   5   3    0.04    0.39
   0   5   3    0.61    0.39
   0   5   3    0.51    0.40
   0   5   3    0.28    0.38
  -1  -5  -3  173.48    5.22
  -1  -5  -3  164.91    5.91
  -1  -5  -3  173.65    4.91
  -1  -5  -3  161.81    4.87
   1   5   3  175.55    4.89
   1   5   3  170.82    4.85
   1   5   3  172.41    5.13
  -2  -5  -3   72.21    2.99
  -2  -5  -3   73.97    2.67
  -2  -5  -3   70.68    2.68
  -2  -5  -3   77.96    2.53
  -2  -5  -3   76.81    2.50
   2   5   3   76.94    2.62
   2   5   3   75.09    2.48
  -3  -5  -3   71.36    2.54
  -3  -5  -3   58.01    3.17
  -3  -5  -3   65.22    2.48
   3   5   3   71.26    2.45
  -4  -5  -3  136.84    4.30
  -4  -5  -3  123.30    4.21
  -4  -5  -3  122.06    5.16
  -5  -5  -3    3.66    0.83
  -5  -5  -3    1.92    1.22
  -5  -5  -3    1.82    0.72
  -6  -5  -3   59.67    2.56
  -6  -5  -3   55.92    3.35
  -6  -5  -3   60.13    2.61
  -7  -5  -3    2.18    0.93
  -7  -5  -3    2.29    0.92
  -7  -5  -3    2.51    1.44
  -8  -5  -3   11.65    2.04
  -8  -5  -3   13.61    1.46
  -8  -5  -3   13.76    1.49
  -9   6   3    0.75    1.20
   8  -6  -3   14.81    0.68
  -8   6   3   16.97    1.84
  -8   6   3   15.24    0.78
  -8   6   3   14.00    0.77
   7  -6  -3    4.89    0.43
  -7   6   3    5.86    0.55
  -7   6   3    5.74    1.24
  -7   6   3    5.05    0.51
   6  -6  -3   12.87    0.69
  -6   6   3   13.39    0.92
  -6   6   3   15.05    0.80
  -6   6   3   10.70    1.33
  -6   6   3   15.07    1.48
   5  -6  -3   52.96    1.64
  -5   6   3   56.27    2.58
  -5   6   3   51.19    1.89
  -5   6   3   51.80    2.60
  -5   6   3   57.47    1.94
  -5   6   3   52.45    1.74
   4  -6  -3    5.35    0.47
  -4   6   3    4.75    0.77
  -4   6   3    4.09    0.56
  -4   6   3    4.76    0.59
  -4   6   3    5.06    0.54
  -4   6   3    5.06    0.90
   3  -6  -3  226.10    5.78
  -3   6   3  219.17    5.91
  -3   6   3  221.67    5.87
  -3   6   3  221.84    6.48
  -3   6   3  219.42    6.51
  -3   6   3  225.27    7.89
  -3   6   3  217.19    7.33
   2  -6  -3    1.33    0.53
  -2   6   3    1.58    0.49
  -2   6   3    1.49    0.59
  -2   6   3    1.34    0.49
  -2   6   3    2.06    0.46
   1  -6  -3  140.37    5.06
   1  -6  -3  134.25    4.37
  -1   6   3  145.06    4.42
  -1   6   3  144.97    4.13
  -1   6   3  137.34    4.34
  -1   6   3  149.31    4.84
   0  -6  -3   19.29    1.31
   0  -6  -3   21.95    1.13
   0  -6  -3   21.90    1.20
   0   6   3   23.07    1.25
   0   6   3   21.13    1.08
   0   6   3   21.43    1.21
   0   6   3   21.22    1.17
  -1  -6  -3   -0.12    0.43
  -1  -6  -3    0.66    0.54
  -1  -6  -3    0.05    0.59
   1   6   3   -0.17    0.42
   1   6   3   -0.16    0.43
   1   6   3    0.71    0.51
  -2  -6  -3   37.70    1.65
  -2  -6  -3   38.07    1.98
  -2  -6  -3   35.91    1.78
   2   6   3   38.30    1.74
   2   6   3   36.55    1.59
  -3  -6  -3   12.53    1.76
  -3  -6  -3   17.17    1.23
  -3  -6  -3   17.84    1.32
   3   6   3   15.14    1.12
  -4  -6  -3   14.79    1.93
  -4  -6  -3   18.69    1.39
  -4  -6  -3   15.53    1.30
  -5  -6  -3   27.78    1.79
  -5  -6  -3   28.92    1.85
  -5  -6  -3   26.03    2.45
  -6  -6  -3    0.41    1.32
  -6  -6  -3   -0.03    0.71
  -6  -6  -3   -1.02    0.79
  -7  -6  -3   13.57    1.47
  -7  -6  -3    9.76    1.87
  -7  -6  -3    9.61    1.30
  -8  -6  -3    7.25    1.24
  -8  -6  -3    6.64    1.27
  -8  -6  -3    4.33    1.67
   9  -7  -3    2.64    0.46
  -9   7   3    1.51    1.28
  -8   7   3    0.41    0.42
  -8   7   3    0.28    1.10
  -8   7   3    1.01    0.46
  -7   7   3   20.89    1.06
  -7   7   3   18.65    1.86
  -7   7   3   20.37    1.03
   6  -7  -3   11.18    0.71
  -6   7   3   11.27    0.80
  -6   7   3   10.42    0.84
  -6   7   3   11.45    0.77
  -6   7   3   11.53    1.44
   5  -7  -3   25.56    1.08
  -5   7   3   23.80    1.22
  -5   7   3   23.42    1.13
  -5   7   3   25.24    1.19
  -5   7   3   24.56    1.27
  -5   7   3   21.69    1.72
  -4   7   3   18.09    1.12
  -4   7   3   17.83    1.51
  -4   7   3   20.54    1.13
  -4   7   3   20.76    1.22
  -4   7   3   19.80    1.03
  -3   7   3    7.85    0.69
  -3   7   3    6.47    0.91
  -3   7   3    5.71    0.69
  -3   7   3    6.50    0.73
  -2   7   3    4.25    0.81
  -2   7   3    4.47    0.67
  -2   7   3    3.84    0.65
   1  -7  -3   10.77    0.95
  -1   7   3    9.80    0.90
  -1   7   3   11.67    1.05
  -1   7   3   10.05    0.88
   0  -7  -3   -0.06    0.55
   0   7   3    0.18    0.52
   0   7   3    0.26    0.52
   0   7   3    0.29    0.60
  -1  -7  -3  124.43    4.09
   1   7   3  121.83    4.00
  -2  -7  -3    4.53    0.87
   2   7   3    4.43    0.76
  -3  -7  -3   65.96    2.65
  -3  -7  -3   52.64    3.36
   3   7   3   70.53    2.60
  -4  -7  -3    3.16    1.37
  -4  -7  -3    2.24    0.87
  -5  -7  -3    3.29    1.03
  -5  -7  -3    4.75    1.59
  -5  -7  -3    3.19    0.96
  -6  -7  -3    2.31    1.06
  -6  -7  -3    0.76    1.46
  -6  -7  -3    1.18    0.93
  -7  -7  -3   15.59    1.66
  -7  -7  -3   15.40    1.61
  -7  -7  -3   14.91    2.22
  -8   8   3   10.86    1.66
  -7   8   3    7.83    1.43
  -7   8   3    8.61    0.78
  -7   8   3    7.14    0.75
  -6   8   3   13.50    0.94
  -6   8   3   13.68    1.60
  -6   8   3   12.34    0.93
  -5   8   3    0.44    0.54
  -5   8   3    0.73    0.91
  -5   8   3    0.60    0.59
  -5   8   3    0.25    0.52
  -4   8   3    0.72    0.81
  -4   8   3    0.74    0.55
  -4   8   3    1.43    0.59
  -3   8   3   13.16    1.04
  -3   8   3   16.32    1.40
  -3   8   3   15.15    1.11
  -2   8   3   31.64    1.63
  -2   8   3   29.73    1.72
  -2   8   3   33.40    1.62
  -1   8   3   12.23    1.14
  -1   8   3    9.84    0.97
  -1   8   3   10.42    1.01
   0  -8  -3   86.50    3.21
   0   8   3   86.87    3.12
   0   8   3   95.18    3.23
  -1  -8  -3    5.28    0.89
   1   8   3    5.21    0.87
  -2  -8  -3   51.08    2.32
   2   8   3   53.46    2.36
  -3  -8  -3   25.60    1.72
  -3  -8  -3   19.02    2.32
   3   8   3   20.51    1.49
  -4  -8  -3    9.50    1.84
  -4  -8  -3   11.01    1.34
  -5  -8  -3   38.89    2.99
  -5  -8  -3   35.07    2.17
  -6  -8  -3   -0.32    0.93
  -6  -8  -3    1.20    1.54
  -7  -8  -3   25.77    2.11
  -7  -8  -3   22.17    2.57
  -8   9   3    0.34    1.26
  -7   9   3    3.73    0.70
  -7   9   3    3.91    1.28
  -6   9   3   12.70    1.59
  -6   9   3   11.95    0.99
  -5   9   3    2.57    1.06
  -5   9   3    3.36    0.76
  -5   9   3    2.53    0.66
  -4   9   3   58.04    2.41
  -4   9   3   61.91    2.91
  -4   9   3   63.30    2.49
  -3   9   3    0.15    0.63
  -3   9   3   -0.05    0.63
  -3   9   3   -0.18    0.80
  -2   9   3   66.36    2.64
  -2   9   3   62.39    2.58
  -2   9   3   70.30    2.86
  -1   9   3    5.12    0.90
  -1   9   3    4.45    0.84
   0  -9  -3   19.46    1.47
   0   9   3   15.49    1.30
  -1  -9  -3   26.25    1.64
   1   9   3   23.48    1.57
  -2  -9  -3   -0.50    0.74
   2   9   3    1.79    0.88
  -3  -9  -3   13.37    1.46
  -3  -9  -3   10.75    1.92
   3   9   3   14.69    1.40
  -4  -9  -3   11.79    1.46
  -4  -9  -3   15.41    2.20
  -5  -9  -3   -0.42    0.93
  -5  -9  -3   -0.44    1.40
  -6  -9  -3    1.71    1.58
  -6  -9  -3    5.11    1.29
  -7  10   3    0.14    1.13
  -7  10   3    0.34    0.65
  -6  10   3   11.22    1.01
  -6  10   3   12.50    1.65
  -5  10   3    1.28    0.76
  -5  10   3    1.06    1.03
  -5  10   3    0.34    0.65
  -4  10   3    2.90    1.04
  -4  10   3    1.98    0.75
  -4  10   3    3.29    0.84
  -3  10   3    2.93    1.02
  -3  10   3    0.83    0.79
  -3  10   3    1.82    0.84
  -2  10   3    4.22    0.94
  -2  10   3    5.30    0.96
  -1  10   3    0.45    0.79
  -1  10   3    0.95    0.73
   0  10   3   26.49    1.75
  -1 -10  -3    4.56    1.06
   1  10   3    3.62    0.94
  -2 -10  -3   13.89    2.20
  -2 -10  -3   15.39    1.51
   2  10   3   13.04    1.42
  -3 -10  -3    1.83    1.03
  -3 -10  -3    2.30    1.62
   3  10   3    3.50    1.05
  -4 -10  -3   -0.95    1.44
  -4 -10  -3    1.57    1.06
  -5 -10  -3    1.55    1.17
  -5 -10  -3    3.48    1.75
  -6  11   3   -0.09    0.68
  -6  11   3   -0.99    1.13
  -5  11   3    0.92    0.82
  -5  11   3    2.23    1.17
  -5  11   3    0.94    0.74
  -4  11   3    1.80    0.83
  -4  11   3    2.74    0.93
  -4  11   3    1.83    1.09
  -3  11   3    7.11    1.10
  -3  11   3    6.22    1.08
  -2  11   3    2.42    0.93
  -2  11   3    2.87    0.98
  -1  11   3   12.49    1.32
   0  11   3    0.25    0.83
   1  11   3    6.13    1.20
  -2 -11  -3    5.39    1.27
  -2 -11  -3    5.43    1.86
   2  11   3    3.09    1.10
  -3 -11  -3    7.75    1.40
  -3 -11  -3    7.92    1.98
   3  11   3    7.90    1.37
  -4 -11  -3   21.35    2.00
  -4 -11  -3   19.42    2.52
  -5  12   3    9.96    1.21
  -5  12   3   13.63    1.38
  -4  12   3    0.06    0.88
  -4  12   3    0.17    0.82
  -3  12   3   30.95    1.96
  -3  12   3   26.24    1.89
  -2  12   3    0.33    0.91
  -2  12   3    0.19    0.88
  -1  12   3   17.14    1.58
   0  12   3    4.47    1.10
  -1 -12  -3   -0.31    1.64
   1  12   3    1.60    1.04
  -2 -12  -3    8.70    2.14
   2  12   3   11.90    1.48
  -3 -12  -3    0.60    1.21
  -3 -12  -3    2.89    1.84
   3  12   3    1.53    1.19
  -2  13   3   -0.08    0.93
  -1  13   3    1.22    1.00
   0  13   3    1.09    1.00
   0  14  -4    6.81    1.33
  -1  14  -4    0.48    1.01
   3  13  -4    0.86    1.18
  -3 -13   4    1.72    1.14
   2  13  -4   10.76    1.53
   1  13  -4    6.99    1.30
   0  13  -4   -0.63    0.93
  -1  13  -4    6.80    1.22
  -2  13  -4   15.50    1.60
  -2  13  -4   12.51    1.45
  -3  13  -4    2.31    1.02
  -3  13  -4    3.56    1.08
  -4  13  -4   12.57    1.38
  -4  13  -4   15.50    1.54
  -5 -12   4   22.09    2.03
  -4 -12   4    1.41    1.09
   3  12  -4   34.15    2.25
  -3 -12   4   33.56    2.16
   2  12  -4    8.78    1.29
  -2 -12   4    7.29    1.28
   1  12  -4   16.25    1.63
   0  12  -4   13.05    1.44
   0  12  -4   13.76    2.11
  -1  12  -4    1.27    0.91
  -1  12  -4    2.17    1.46
  -2  12  -4   22.85    1.75
  -2  12  -4   20.66    1.69
  -2  12  -4   22.69    2.53
  -3  12  -4    0.46    1.42
  -3  12  -4    1.30    0.96
  -3  12  -4    0.04    0.88
  -4  12  -4    3.61    1.02
  -4  12  -4    3.28    1.04
  -5  12  -4    1.02    0.85
  -5  12  -4    0.98    0.91
  -5  12  -4    2.29    1.65
  -6 -11   4   -0.52    1.02
  -5 -11   4    9.89    1.46
  -4 -11   4    0.96    0.93
   3  11  -4   -0.14    0.89
  -3 -11   4    0.93    0.88
   2  11  -4   -0.56    0.86
  -2 -11   4    1.71    0.89
   1  11  -4   19.21    1.58
  -1 -11   4   17.50    1.55
   0  11  -4   -0.76    1.33
   0  11  -4   -0.04    0.81
  -1  11  -4   23.82    1.75
  -1  11  -4   25.39    1.84
  -1  11  -4   32.26    2.85
  -2  11  -4    0.02    0.83
  -2  11  -4    0.31    1.28
  -2  11  -4   -0.10    0.82
  -3  11  -4    2.87    1.37
  -3  11  -4    4.06    0.96
  -3  11  -4    2.46    0.92
  -4  11  -4    1.03    1.41
  -4  11  -4   -0.63    0.76
  -4  11  -4    1.81    0.91
  -5  11  -4    0.90    0.74
  -5  11  -4    0.86    0.87
  -5  11  -4    2.67    1.62
  -5  11  -4    0.47    1.38
  -5  11  -4   -1.93    1.00
  -6  11  -4    4.80    1.37
  -6  11  -4    7.31    1.92
  -6  11  -4    4.50    0.86
  -7 -10   4   -2.02    0.90
  -6 -10   4    5.35    1.22
  -5 -10   4    6.15    1.19
  -4 -10   4   -1.06    0.80
   3  10  -4   23.38    1.72
  -3 -10   4   26.79    1.70
   2  10  -4   18.50    1.54
  -2 -10   4   17.81    1.52
   1  10  -4    6.65    1.05
  -1 -10   4    6.65    1.03
   0  10  -4    5.40    1.03
  -1  10  -4    4.26    0.89
  -1  10  -4    4.21    1.47
  -1  10  -4    3.69    0.89
  -2  10  -4    2.79    1.33
  -2  10  -4    1.18    0.78
  -2  10  -4    1.18    0.78
  -3  10  -4   29.76    1.72
  -3  10  -4   32.88    2.80
  -3  10  -4   32.12    1.88
  -4  10  -4    0.30    1.30
  -4  10  -4    0.56    0.95
  -4  10  -4    1.07    0.73
  -4  10  -4    0.23    0.79
  -5  10  -4   48.40    2.18
  -5  10  -4   48.65    3.48
  -5  10  -4   52.17    2.75
  -5  10  -4   54.19    2.39
  -5  10  -4   56.28    3.63
  -6  10  -4    2.66    1.21
  -6  10  -4    1.32    1.54
  -6  10  -4    1.19    0.68
  -7  10  -4   15.70    2.33
  -7  -9   4    0.23    0.99
  -7  -9   4    0.71    0.96
  -6  -9   4   23.64    1.84
  -5  -9   4    0.50    0.86
   4   9  -4   56.85    2.48
  -4  -9   4   52.28    2.52
   3   9  -4    7.15    1.03
  -3  -9   4    8.41    1.11
   2   9  -4   77.31    2.93
  -2  -9   4   74.74    2.96
   1   9  -4   42.21    1.99
  -1  -9   4   42.61    1.96
   0   9  -4   19.28    1.39
   0   9  -4   18.49    1.39
   0  -9   4   18.50    1.33
  -1   9  -4  116.81    4.08
  -1   9  -4  117.74    5.58
  -1   9  -4  126.96    4.14
  -2   9  -4    5.08    0.81
  -2   9  -4    5.55    0.90
  -2   9  -4    5.93    1.49
  -3   9  -4   53.96    2.29
  -3   9  -4   55.11    2.34
  -3   9  -4   57.33    2.53
  -3   9  -4   60.16    3.56
  -4   9  -4    3.12    0.82
  -4   9  -4    3.94    0.78
  -4   9  -4    3.64    1.36
  -4   9  -4    1.86    0.97
  -5   9  -4    2.14    1.08
  -5   9  -4    1.52    0.75
  -5   9  -4    3.15    1.35
  -5   9  -4    1.24    0.65
  -5   9  -4    0.43    1.32
  -6   9  -4    1.49    1.32
  -6   9  -4    0.54    0.60
  -6   9  -4   -0.10    1.03
  -6   9  -4   -0.66    1.36
  -7   9  -4    2.96    1.65
  -7   9  -4    2.44    0.60
  -7   9  -4    2.00    0.76
  -7   9  -4    2.11    1.32
   7  -9   4    3.30    0.70
  -8   9  -4    0.33    0.64
   8  -9   4    0.98    0.67
  -8  -8   4   26.45    1.98
  -7  -8   4   -0.51    0.85
  -7  -8   4    0.41    0.88
  -6  -8   4   35.21    2.07
  -6  -8   4   42.24    2.26
  -5  -8   4    0.64    0.85
  -5  -8   4    0.75    0.79
   4   8  -4   13.43    1.17
  -4  -8   4   10.16    1.17
   3   8  -4   13.37    1.15
  -3  -8   4   12.72    1.15
   2   8  -4   18.49    1.26
  -2  -8   4   16.93    1.32
  -2  -8   4   17.44    1.21
   1   8  -4   26.49    1.57
  -1  -8   4   26.93    1.41
   0   8  -4   70.67    2.59
   0   8  -4   67.21    2.57
   0  -8   4   69.29    2.56
  -1   8  -4    0.01    1.14
  -1   8  -4    1.48    0.62
  -1   8  -4    0.22    0.58
  -2   8  -4   74.88    2.87
  -2   8  -4   70.63    2.67
  -2   8  -4   77.26    2.72
  -2   8  -4   68.47    3.81
  -3   8  -4    8.02    1.04
  -3   8  -4    7.24    0.88
  -3   8  -4    6.50    1.46
  -3   8  -4    8.48    0.87
  -4   8  -4    7.06    0.84
  -4   8  -4    9.93    0.95
  -4   8  -4    9.08    1.19
  -4   8  -4    9.83    1.60
   4  -8   4   10.46    0.80
  -5   8  -4   22.16    1.37
  -5   8  -4   17.82    1.24
  -5   8  -4   20.04    1.71
  -5   8  -4   17.30    1.27
  -5   8  -4   20.81    2.28
  -5   8  -4   20.18    2.21
  -5   8  -4   21.98    1.15
   5  -8   4   23.13    1.18
  -6   8  -4   11.93    0.96
  -6   8  -4   14.34    2.01
  -6   8  -4   12.35    1.03
  -6   8  -4   12.08    0.92
  -6   8  -4   10.57    1.52
  -6   8  -4   12.65    1.99
   6  -8   4   13.42    0.91
  -7   8  -4    7.23    1.73
  -7   8  -4    5.85    1.40
  -7   8  -4    7.39    1.81
  -7   8  -4    5.53    0.84
  -7   8  -4    5.95    0.76
  -7   8  -4    4.72    0.64
   7  -8   4    5.78    0.71
  -8   8  -4   12.15    1.00
  -8   8  -4   10.11    2.00
  -8   8  -4   10.95    1.78
   8  -8   4   12.38    0.96
  -8  -7   4    2.10    0.96
  -8  -7   4    2.68    0.93
  -7  -7   4    8.61    1.18
  -7  -7   4    8.87    1.19
  -6  -7   4    1.12    0.85
  -6  -7   4    1.09    0.77
  -5  -7   4    0.91    0.73
  -5  -7   4    0.78    0.74
   4   7  -4   58.62    2.30
  -4  -7   4   56.31    2.32
  -4  -7   4   58.00    2.37
   3   7  -4    3.67    0.69
  -3  -7   4    3.05    0.72
  -3  -7   4    2.97    0.70
   2   7  -4   99.90    3.23
   2   7  -4  102.61    3.45
  -2  -7   4  108.20    3.29
  -2  -7   4  102.13    3.42
  -2  -7   4   95.51    3.87
   1   7  -4    6.18    0.73
   1   7  -4    6.66    0.82
  -1  -7   4    4.71    0.70
  -1  -7   4    5.69    0.85
   0   7  -4    7.51    0.74
   0   7  -4    7.54    0.82
   0   7  -4    7.85    0.82
   0  -7   4    7.87    0.78
   0  -7   4    5.10    0.80
  -1   7  -4   13.10    1.03
  -1   7  -4   13.25    1.69
  -1   7  -4   14.29    1.02
  -1   7  -4   14.66    1.04
   1  -7   4   14.94    1.00
  -2   7  -4   80.70    2.92
  -2   7  -4   74.42    2.66
  -2   7  -4   78.32    2.71
  -2   7  -4   72.44    3.91
  -3   7  -4    8.29    0.68
  -3   7  -4    6.21    0.73
  -3   7  -4    7.21    0.96
  -3   7  -4    7.51    1.41
   3  -7   4    6.98    0.62
  -4   7  -4  109.03    4.19
  -4   7  -4  111.37    3.55
  -4   7  -4  114.60    3.24
  -4   7  -4  106.65    5.04
  -4   7  -4  109.27    3.63
  -4   7  -4  115.97    3.39
   4  -7   4  114.95    3.18
  -5   7  -4    3.65    0.66
  -5   7  -4    2.10    0.92
  -5   7  -4    1.31    1.17
  -5   7  -4    2.81    1.26
  -5   7  -4    2.80    0.64
  -5   7  -4    3.59    0.72
  -5   7  -4    2.29    0.52
  -5   7  -4    2.86    0.63
   5  -7   4    2.33    0.60
   5  -7   4    1.71    0.48
  -6   7  -4   35.91    2.80
  -6   7  -4   35.82    1.56
  -6   7  -4   31.88    2.18
  -6   7  -4   38.17    1.51
  -6   7  -4   37.31    1.61
  -6   7  -4   36.34    2.86
  -6   7  -4   36.77    1.65
   6  -7   4   37.91    1.44
   6  -7   4   40.51    1.60
  -7   7  -4    4.26    1.29
  -7   7  -4    4.00    1.58
  -7   7  -4    3.60    0.69
  -7   7  -4    3.24    0.62
  -7   7  -4    3.16    1.49
  -7   7  -4    3.35    0.55
   7  -7   4    4.24    0.70
   7  -7   4    2.27    0.54
  -8   7  -4    8.33    1.85
  -8   7  -4    6.04    0.77
  -8   7  -4    6.03    1.50
   8  -7   4    5.80    0.69
  -9  -6   4    1.41    0.88
  -9  -6   4    0.54    0.83
  -8  -6   4    0.48    0.78
  -8  -6   4    0.87    0.79
  -7  -6   4    8.83    1.11
  -7  -6   4    8.99    1.12
  -6  -6   4    1.94    0.76
  -6  -6   4    1.19    0.74
  -5  -6   4   44.82    2.03
  -5  -6   4   46.41    2.07
  -4  -6   4    2.74    0.64
  -4  -6   4    3.36    0.70
   3   6  -4  149.61    4.78
  -3  -6   4  164.34    4.96
  -3  -6   4  155.19    4.86
   2   6  -4   42.06    1.63
   2   6  -4   39.27    1.59
   2   6  -4   41.44    1.76
  -2  -6   4   41.51    1.92
  -2  -6   4   43.55    1.75
  -2  -6   4   42.18    1.73
  -2  -6   4   42.17    1.63
   1   6  -4  116.97    3.80
   1   6  -4  124.92    3.62
   1   6  -4  119.65    3.59
   1   6  -4  120.47    3.86
  -1  -6   4  124.16    3.82
  -1  -6   4  120.78    4.36
  -1  -6   4  112.41    3.57
   0   6  -4  229.14    6.82
   0   6  -4  225.37    6.35
   0   6  -4  227.41    6.76
   0   6  -4  229.79    6.36
   0  -6   4  231.40    6.37
   0  -6   4  221.89    6.70
   0  -6   4  230.86    7.74
   0  -6   4  239.06    7.75
  -1   6  -4    9.30    0.79
  -1   6  -4    9.34    0.82
  -1   6  -4   10.24    0.84
  -1   6  -4    7.86    0.68
  -1   6  -4    8.67    0.70
   1  -6   4    8.96    0.85
   1  -6   4    9.67    0.74
   1  -6   4    7.55    0.83
  -2   6  -4  206.67    5.38
  -2   6  -4  204.91    6.58
  -2   6  -4  166.09    7.75
  -2   6  -4  203.94    6.01
  -2   6  -4  203.90    6.00
  -2   6  -4  208.01    5.49
   2  -6   4  207.34    5.29
   2  -6   4  205.78    6.85
  -3   6  -4    1.70    0.40
  -3   6  -4    1.73    0.64
  -3   6  -4    2.06    0.98
  -3   6  -4    2.97    0.55
  -3   6  -4    2.11    0.58
  -3   6  -4    2.42    0.52
   3  -6   4    2.45    0.42
   3  -6   4    2.36    0.50
  -4   6  -4   25.01    1.26
  -4   6  -4   28.72    1.37
  -4   6  -4   22.28    2.03
  -4   6  -4   27.05    1.22
  -4   6  -4   25.57    1.09
  -4   6  -4   23.93    1.59
   4  -6   4   27.90    1.07
   4  -6   4   26.70    1.21
  -5   6  -4    0.25    0.53
  -5   6  -4   -0.12    1.03
  -5   6  -4    0.28    0.40
  -5   6  -4    1.18    0.83
  -5   6  -4    0.99    0.51
  -5   6  -4    0.72    0.57
  -5   6  -4   -0.07    0.97
   5  -6   4   -0.02    0.37
   5  -6   4    1.08    0.50
  -6   6  -4    3.93    1.11
  -6   6  -4    3.34    0.55
  -6   6  -4    4.23    1.33
  -6   6  -4    2.86    0.58
  -6   6  -4    3.61    0.69
  -6   6  -4    2.24    1.30
   6  -6   4    3.46    0.49
   6  -6   4    4.02    0.65
  -7   6  -4    0.89    0.47
  -7   6  -4    2.58    1.30
  -7   6  -4   -0.41    1.20
  -7   6  -4    1.70    1.13
  -7   6  -4    1.02    0.61
  -7   6  -4    1.93    0.56
   7  -6   4    1.47    0.49
   7  -6   4    1.48    0.59
  -8   6  -4    9.79    2.04
  -8   6  -4   11.59    0.88
  -8   6  -4   10.64    2.01
  -8   6  -4   10.15    0.93
   8  -6   4   10.03    0.77
   8  -6   4    9.67    0.89
  -9   6  -4    0.53    0.56
  -9   6  -4    2.16    1.56
   9  -6   4    1.71    0.58
  -9  -5   4   19.39    1.40
  -8  -5   4    2.87    0.86
  -8  -5   4    1.62    0.78
  -7  -5   4   79.74    3.03
  -7  -5   4   84.26    3.08
  -6  -5   4    2.00    0.67
  -6  -5   4    1.72    0.68
  -6  -5   4    1.03    0.74
  -5  -5   4   66.82    2.55
  -5  -5   4   70.06    2.58
  -4  -5   4   27.96    1.40
  -4  -5   4   23.47    1.36
   3   5  -4    2.64    0.53
   3   5  -4    2.09    0.60
   3   5  -4    2.25    0.49
  -3  -5   4    2.35    0.53
  -3  -5   4    2.56    0.57
  -3  -5   4    1.33    0.50
  -3  -5   4    1.82    0.46
   2   5  -4   57.16    2.39
   2   5  -4   61.99    2.43
   2   5  -4   57.77    1.98
   2   5  -4   58.99    2.10
   2   5  -4   60.07    1.98
  -2  -5   4   58.37    2.09
  -2  -5   4   53.75    2.32
  -2  -5   4   56.39    1.96
  -2  -5   4   55.59    2.06
   1   5  -4   53.55    2.25
   1   5  -4   52.83    2.24
   1   5  -4   55.80    1.88
   1   5  -4   55.26    2.04
   1   5  -4   53.99    1.86
   1   5  -4   56.19    2.00
  -1  -5   4   56.44    1.87
  -1  -5   4   54.60    2.24
  -1  -5   4   55.29    1.97
  -1  -5   4   56.73    2.00
  -1  -5   4   57.03    2.27
   0   5  -4    3.24    0.50
   0   5  -4    4.16    0.61
   0   5  -4    3.47    0.49
   0   5  -4    3.26    0.52
   0   5  -4    3.01    0.51
   0  -5   4    2.89    0.50
   0  -5   4    3.29    0.59
   0  -5   4    3.87    0.63
   0  -5   4    3.03    0.46
  -1   5  -4  115.16    3.40
  -1   5  -4  117.12    3.91
  -1   5  -4  117.70    3.32
  -1   5  -4  115.89    3.62
  -1   5  -4  117.19    3.63
  -1   5  -4  113.40    3.39
  -1   5  -4  117.93    3.24
   1  -5   4  112.87    4.12
   1  -5   4  118.02    3.17
   1  -5   4  115.32    3.56
   1  -5   4  118.72    4.14
   1  -5   4  118.42    3.40
  -2   5  -4   -0.20    0.33
  -2   5  -4   -0.07    0.40
  -2   5  -4   -0.91    0.74
  -2   5  -4    0.16    0.54
  -2   5  -4    0.02    0.43
  -2   5  -4    0.01    0.35
  -2   5  -4    0.03    0.42
  -2   5  -4    0.31    0.33
   2  -5   4   -0.19    0.40
   2  -5   4    0.30    0.35
   2  -5   4    0.27    0.46
   2  -5   4    0.33    0.33
   2  -5   4    0.93    0.43
  -3   5  -4   33.33    1.19
  -3   5  -4   30.32    2.14
  -3   5  -4   32.53    1.42
  -3   5  -4   35.09    1.45
  -3   5  -4   33.25    1.34
  -3   5  -4   33.18    1.68
   3  -5   4   34.63    1.28
   3  -5   4   33.77    1.16
   3  -5   4   35.89    1.60
  -4   5  -4   33.73    1.32
  -4   5  -4   30.41    1.65
  -4   5  -4   29.73    1.35
  -4   5  -4   30.46    1.15
  -4   5  -4   33.09    1.43
  -4   5  -4   30.33    2.19
  -4   5  -4   27.61    2.15
   4  -5   4   31.53    1.11
   4  -5   4   32.44    1.27
  -5   5  -4    7.68    0.59
  -5   5  -4    6.96    0.69
  -5   5  -4    8.76    1.44
  -5   5  -4    8.54    0.79
  -5   5  -4    6.99    1.10
  -5   5  -4    8.55    0.76
  -5   5  -4    9.85    1.48
   5  -5   4    7.66    0.69
   5  -5   4    6.85    0.52
  -6   5  -4   44.97    1.53
  -6   5  -4   42.67    1.68
  -6   5  -4   47.65    1.73
  -6   5  -4   41.67    2.83
  -6   5  -4   41.98    2.35
  -6   5  -4   44.31    2.81
   6  -5   4   44.65    1.63
   6  -5   4   45.44    1.45
  -7   5  -4    7.78    0.66
  -7   5  -4    5.59    1.48
  -7   5  -4    8.31    1.39
  -7   5  -4    8.58    0.86
  -7   5  -4    7.90    1.70
  -7   5  -4    8.44    0.70
   7  -5   4    7.68    0.76
   7  -5   4    6.90    0.61
  -8   5  -4    4.18    1.58
  -8   5  -4    6.55    1.73
  -8   5  -4    6.80    0.74
  -8   5  -4    5.91    0.82
   8  -5   4    5.40    0.63
  -9   5  -4    1.30    1.57
   9  -5   4    1.58    0.57
  -9  -4   4    4.75    0.86
  -8  -4   4    8.10    1.01
  -8  -4   4    8.09    0.95
  -7  -4   4   -0.32    0.62
  -7  -4   4    0.01    0.81
  -7  -4   4    0.56    0.63
  -6  -4   4    3.78    0.85
  -6  -4   4    3.64    0.71
  -6  -4   4    3.21    0.66
   5   4  -4   63.49    1.99
  -5  -4   4   61.39    2.29
  -5  -4   4   61.31    2.28
  -5  -4   4   61.75    2.49
   4   4  -4    6.23    0.56
   4   4  -4    5.58    0.74
  -4  -4   4    7.36    0.75
  -4  -4   4    6.78    0.70
  -4  -4   4    6.19    0.67
   3   4  -4  176.93    5.24
   3   4  -4  177.31    6.08
   3   4  -4  183.87    6.07
   3   4  -4  170.78    4.97
   3   4  -4  179.05    4.99
  -3  -4   4  174.80    4.98
  -3  -4   4  181.56    5.66
  -3  -4   4  182.83    5.34
  -3  -4   4  174.93    5.27
  -3  -4   4  172.70    5.99
   2   4  -4   92.32    3.33
   2   4  -4   89.57    2.87
   2   4  -4   91.45    2.75
   2   4  -4   90.02    2.73
   2   4  -4   89.58    3.32
  -2  -4   4   88.93    3.29
  -2  -4   4   93.13    3.31
  -2  -4   4   92.47    2.74
  -2  -4   4   91.99    2.90
  -2  -4   4   87.63    2.88
   1   4  -4   99.89    3.10
   1   4  -4   97.71    2.93
   1   4  -4  102.43    3.56
   1   4  -4   97.13    3.54
  -1  -4   4   98.04    2.93
  -1  -4   4  102.77    3.11
  -1  -4   4   93.59    3.51
  -1  -4   4  101.65    3.54
   0   4  -4   12.26    0.79
   0   4  -4   11.43    0.81
   0   4  -4   10.50    0.76
   0   4  -4   10.21    0.65
   0   4  -4   11.37    0.67
   0   4  -4   11.26    0.80
   0  -4   4   10.96    0.73
   0  -4   4   11.66    0.82
   0  -4   4   11.43    0.66
   0  -4   4   10.82    0.82
  -1   4  -4   17.16    0.93
  -1   4  -4   17.94    0.90
  -1   4  -4   18.20    0.93
  -1   4  -4   15.86    0.78
  -1   4  -4   17.69    0.84
  -1   4  -4   16.42    0.98
   1  -4   4   18.23    1.04
   1  -4   4   16.79    0.75
   1  -4   4   15.44    0.98
   1  -4   4   19.61    0.83
   1  -4   4   16.97    0.85
  -2   4  -4   44.73    1.56
  -2   4  -4   45.67    1.68
  -2   4  -4   41.56    2.44
  -2   4  -4   46.83    1.89
  -2   4  -4   43.47    1.53
  -2   4  -4   45.80    1.70
  -2   4  -4   46.54    1.43
   2  -4   4   45.38    1.40
   2  -4   4   45.83    1.53
   2  -4   4   44.25    1.51
   2  -4   4   42.78    1.85
   2  -4   4   46.42    1.86
  -3   4  -4  129.30    3.72
  -3   4  -4  124.73    3.93
  -3   4  -4  115.60    5.15
  -3   4  -4  129.54    3.62
  -3   4  -4  132.89    3.97
  -3   4  -4  129.17    3.47
  -3   4  -4  125.17    4.44
   3  -4   4  129.34    3.39
   3  -4   4  130.60    3.63
   3  -4   4  131.92    3.52
   3  -4   4  132.90    4.49
  -4   4  -4    1.37    0.51
  -4   4  -4    0.73    0.62
  -4   4  -4    0.14    0.42
  -4   4  -4    0.54    0.45
  -4   4  -4    0.95    0.86
  -4   4  -4    1.02    0.78
  -4   4  -4    0.45    0.33
   4  -4   4    0.46    0.38
   4  -4   4    0.24    0.28
   4  -4   4    0.42    0.48
  -5   4  -4  163.38    4.27
  -5   4  -4  172.08    4.85
  -5   4  -4  147.45    5.59
  -5   4  -4  157.44    4.39
  -5   4  -4  148.93    4.77
  -5   4  -4  157.98    6.46
  -5   4  -4  162.99    6.10
   5  -4   4  160.72    4.13
  -6   4  -4    6.69    1.38
  -6   4  -4    6.97    0.58
  -6   4  -4    6.30    0.67
  -6   4  -4    6.17    1.17
  -6   4  -4    6.99    1.43
  -6   4  -4    7.64    0.72
   6  -4   4    7.13    0.54
  -7   4  -4   65.25    3.84
  -7   4  -4   68.60    2.31
  -7   4  -4   66.53    3.29
  -7   4  -4   68.36    3.75
  -7   4  -4   69.33    2.20
  -7   4  -4   68.80    2.31
   7  -4   4   71.28    2.08
  -8   4  -4   13.97    1.05
  -8   4  -4   12.56    0.97
  -8   4  -4   12.00    2.04
  -8   4  -4   13.34    1.98
   8  -4   4   14.26    0.92
  -9   4  -4    0.55    1.53
   9  -4   4    0.31    0.57
 -10  -3   4    5.41    0.79
  -9  -3   4    1.38    0.66
   8   3  -4    2.03    0.59
  -8  -3   4    1.91    0.72
  -8  -3   4    1.98    0.65
   7   3  -4   11.86    0.81
  -7  -3   4   11.68    1.01
  -7  -3   4   12.26    0.95
  -7  -3   4    9.98    0.91
   6   3  -4   67.68    2.13
  -6  -3   4   73.11    2.24
  -6  -3   4   67.57    2.48
  -6  -3   4   70.35    2.41
  -6  -3   4   71.80    2.53
  -6  -3   4   71.40    2.91
   5   3  -4    3.75    0.50
   5   3  -4    2.99    0.43
  -5  -3   4    3.24    0.56
  -5  -3   4    4.08    0.51
  -5  -3   4    3.20    0.53
  -5  -3   4    3.14    0.57
  -5  -3   4    4.08    0.72
   4   3  -4  231.18    6.09
   4   3  -4  241.54    7.89
   4   3  -4  236.33    7.90
   4   3  -4  237.27    6.15
  -4  -3   4  236.83    6.92
  -4  -3   4  235.15    6.44
  -4  -3   4  245.74    7.57
  -4  -3   4  231.20    6.86
  -4  -3   4  236.49    6.24
  -4  -3   4  238.87    6.69
   3   3  -4   12.44    0.92
   3   3  -4   12.80    0.92
   3   3  -4   10.96    0.67
   3   3  -4   11.28    0.69
   3   3  -4   11.11    0.78
   3   3  -4   11.49    0.70
  -3  -3   4   11.88    0.71
  -3  -3   4   11.06    0.79
  -3  -3   4   11.31    0.79
  -3  -3   4   12.00    0.79
  -3  -3   4   12.36    0.86
  -3  -3   4   11.97    0.72
   2   3  -4  149.94    4.39
   2   3  -4  152.32    5.04
   2   3  -4  149.12    4.15
   2   3  -4  138.08    5.02
  -2  -3   4  146.53    4.13
  -2  -3   4  147.65    3.97
  -2  -3   4  151.68    5.03
  -2  -3   4  144.26    4.99
  -2  -3   4  144.92    4.38
  -2  -3   4  153.32    3.99
  -2  -3   4  152.53    4.42
   1   3  -4  269.03    9.11
   1   3  -4  279.71    9.11
   1   3  -4  285.08    7.96
   1   3  -4  279.19    7.49
  -1  -3   4  287.01    9.11
  -1  -3   4  289.83    7.95
  -1  -3   4  281.61    7.49
  -1  -3   4  270.21    9.09
   0   3  -4   11.85    0.75
   0   3  -4   13.04    0.80
   0   3  -4   12.32    0.65
   0   3  -4   11.61    0.75
   0   3  -4   11.38    0.65
   0   3  -4   11.73    0.84
   0  -3   4   12.57    0.80
   0  -3   4   11.79    0.76
   0  -3   4   11.67    0.62
   0  -3   4   10.74    0.77
  -1   3  -4  649.91   17.85
  -1   3  -4  628.67   16.29
  -1   3  -4  644.49   16.20
  -1   3  -4  638.19   20.32
  -1   3  -4  636.15   16.73
  -1   3  -4  666.51   17.98
   1  -3   4  663.69   20.36
   1  -3   4  630.05   16.70
   1  -3   4  623.96   20.39
  -2   3  -4    1.26    0.42
  -2   3  -4    1.03    0.44
  -2   3  -4    0.18    0.45
  -2   3  -4    1.02    0.42
  -2   3  -4    0.50    0.63
  -2   3  -4    0.64    0.36
  -2   3  -4    0.65    0.28
  -2   3  -4    0.31    0.28
   2  -3   4    0.65    0.39
   2  -3   4    1.17    0.33
   2  -3   4    0.63    0.25
   2  -3   4    1.29    0.39
   2  -3   4    1.02    0.44
  -3   3  -4  350.89    9.90
  -3   3  -4  335.32    8.99
  -3   3  -4  340.06   12.44
  -3   3  -4  346.97    8.89
  -3   3  -4  356.45    9.30
  -3   3  -4  336.85    9.93
  -3   3  -4  360.04   10.97
  -3   3  -4  339.38   10.97
  -3   3  -4  341.28   11.43
   3  -3   4  367.30   11.28
   3  -3   4  349.57    9.20
   3  -3   4  346.36    8.78
   3  -3   4  349.17   11.31
   3  -3   4  352.94    8.72
  -4   3  -4    0.20    0.29
  -4   3  -4    0.56    0.57
  -4   3  -4    0.03    0.47
  -4   3  -4    1.26    0.79
  -4   3  -4    0.28    0.71
  -4   3  -4    0.32    0.44
  -4   3  -4   -0.03    0.36
  -4   3  -4    0.00    0.63
   4  -3   4   -0.20    0.25
  -5   3  -4   16.21    1.64
  -5   3  -4   14.51    0.77
  -5   3  -4   14.11    1.52
  -5   3  -4   15.69    0.84
  -5   3  -4   17.27    1.44
  -5   3  -4   15.45    1.02
  -5   3  -4   16.00    1.27
  -5   3  -4   13.36    0.98
   5  -3   4   14.24    0.71
  -6   3  -4   14.18    1.73
  -6   3  -4   12.48    1.67
  -6   3  -4   11.73    1.32
  -6   3  -4   10.22    1.37
  -6   3  -4   11.74    0.78
  -6   3  -4   11.18    0.88
  -6   3  -4   11.81    0.75
   6  -3   4   11.29    0.71
  -7   3  -4   10.87    1.69
  -7   3  -4    7.79    1.59
  -7   3  -4   10.45    0.82
  -7   3  -4   10.94    0.83
  -7   3  -4    9.96    0.84
   7  -3   4    9.73    0.69
  -8   3  -4    3.58    1.59
  -8   3  -4    4.71    1.57
  -8   3  -4    3.47    0.56
  -8   3  -4    5.67    0.77
  -8   3  -4    5.19    0.74
   8  -3   4    4.34    0.64
  -9   3  -4   11.10    2.01
   9  -3   4   11.03    0.91
   9   2  -4    1.30    0.57
  -9  -2   4    1.84    0.61
   8   2  -4   69.87    2.15
  -8  -2   4   63.93    2.37
   7   2  -4    1.20    0.42
   7   2  -4   -0.42    0.44
  -7  -2   4    0.45    0.44
  -7  -2   4   -0.26    0.49
  -7  -2   4    0.27    0.46
  -7  -2   4    0.81    0.46
   6   2  -4  129.41    3.49
   6   2  -4  130.69    3.56
  -6  -2   4  130.12    3.60
  -6  -2   4  131.18    4.01
  -6  -2   4  124.55    3.99
  -6  -2   4  129.17    3.87
   5   2  -4   21.45    0.98
   5   2  -4   22.65    1.23
   5   2  -4   21.70    0.85
  -5  -2   4   21.69    1.09
  -5  -2   4   19.53    1.01
  -5  -2   4   19.87    1.01
  -5  -2   4   23.18    0.99
   4   2  -4   16.64    1.02
   4   2  -4   15.97    1.01
   4   2  -4   16.08    0.82
   4   2  -4   16.71    0.75
   4   2  -4   17.81    0.82
   4   2  -4   16.50    0.84
  -4  -2   4   16.97    0.79
  -4  -2   4   17.37    0.83
  -4  -2   4   17.37    0.94
  -4  -2   4   17.36    0.91
  -4  -2   4   16.59    0.92
  -4  -2   4   15.58    0.82
   3   2  -4  150.04    3.80
   3   2  -4  138.56    4.92
   3   2  -4  145.99    4.90
   3   2  -4  145.90    3.83
   3   2  -4  144.94    4.04
  -3  -2   4  141.71    4.81
  -3  -2   4  147.61    4.88
  -3  -2   4  146.06    4.32
  -3  -2   4  145.65    3.88
  -3  -2   4  143.70    4.03
  -3  -2   4  145.86    4.29
   2   2  -4   17.72    0.94
   2   2  -4   17.81    0.79
   2   2  -4   16.33    0.97
  -2  -2   4   17.29    0.75
  -2  -2   4   19.21    0.93
  -2  -2   4   16.99    0.76
  -2  -2   4   18.21    0.89
  -2  -2   4   19.38    0.78
  -2  -2   4   18.27    0.89
  -2  -2   4   18.00    0.94
   1   2  -4  114.02    3.81
   1   2  -4  104.67    3.79
   1   2  -4  111.36    3.32
  -1  -2   4  111.44    3.12
  -1  -2   4  108.45    3.30
  -1  -2   4  112.56    3.79
  -1  -2   4  109.61    3.79
   0   2  -4   89.35    2.60
   0   2  -4   85.17    3.12
   0   2  -4   92.90    2.81
   0  -2   4   91.25    3.15
   0  -2   4   87.53    2.57
  -1   2  -4   61.47    1.88
  -1   2  -4   53.81    2.60
  -1   2  -4   61.25    2.01
  -1   2  -4   61.07    1.75
  -1   2  -4   60.86    2.21
  -1   2  -4   59.97    2.04
  -1   2  -4   59.34    1.84
   1  -2   4   58.28    1.83
   1  -2   4   55.29    2.25
   1  -2   4   63.81    2.27
  -2   2  -4   83.59    2.35
  -2   2  -4   85.71    2.54
  -2   2  -4   85.10    2.75
  -2   2  -4   83.96    2.92
  -2   2  -4   85.65    2.91
  -2   2  -4   82.22    2.44
  -2   2  -4   83.55    3.19
  -2   2  -4   79.92    3.44
   2  -2   4   83.79    2.49
   2  -2   4   85.25    3.03
   2  -2   4   84.92    2.28
   2  -2   4   87.96    2.37
  -3   2  -4   48.12    2.27
  -3   2  -4   44.70    2.42
  -3   2  -4   49.89    1.57
  -3   2  -4   47.64    1.66
  -3   2  -4   48.59    1.51
  -3   2  -4   47.54    1.84
  -3   2  -4   50.59    2.05
  -3   2  -4   50.20    1.72
   3  -2   4   48.78    1.60
   3  -2   4   50.81    2.01
   3  -2   4   47.10    1.43
  -4   2  -4    5.30    0.52
  -4   2  -4    4.84    0.94
  -4   2  -4    4.74    0.92
  -4   2  -4    4.92    0.68
  -4   2  -4    5.03    0.46
  -4   2  -4    3.94    0.44
  -4   2  -4    8.98    0.97
   4  -2   4    3.71    0.37
  -5   2  -4  120.75    3.79
  -5   2  -4  117.21    3.26
  -5   2  -4  112.89    4.62
  -5   2  -4  115.39    4.88
  -5   2  -4  116.42    4.42
  -5   2  -4  114.99    3.23
   5  -2   4  118.92    3.13
  -6   2  -4    4.14    0.60
  -6   2  -4    5.87    1.28
  -6   2  -4    4.14    1.18
  -6   2  -4    4.98    0.80
  -6   2  -4    6.13    1.16
  -6   2  -4    5.07    0.56
   6  -2   4    5.07    0.50
  -7   2  -4   22.17    2.24
  -7   2  -4   23.05    1.10
  -7   2  -4   24.35    1.26
  -7   2  -4   23.15    2.28
  -7   2  -4   22.24    2.06
   7  -2   4   22.40    1.12
  -8   2  -4    7.19    1.64
  -8   2  -4    8.49    0.82
  -8   2  -4    9.44    0.95
  -8   2  -4    7.95    0.83
  -8   2  -4   10.44    1.80
   8  -2   4    8.89    0.82
  -9   2  -4    0.43    1.44
   9  -2   4    0.69    0.65
  10   1  -4   14.79    0.97
   9   1  -4    2.54    0.53
   9   1  -4    1.26    0.54
  -9  -1   4    1.21    0.50
   8   1  -4    5.72    0.57
   8   1  -4    3.42    0.59
  -8  -1   4    6.43    0.64
  -8  -1   4    5.75    0.65
   7   1  -4    4.39    0.46
   7   1  -4    3.72    0.52
  -7  -1   4    4.10    0.55
  -7  -1   4    3.43    0.54
   6   1  -4    6.28    0.53
   6   1  -4    6.41    0.46
  -6  -1   4    7.21    0.61
  -6  -1   4    7.93    0.60
  -6  -1   4    8.82    0.70
  -6  -1   4    8.82    0.90
   5   1  -4    3.31    0.57
   5   1  -4    3.38    0.40
   5   1  -4    3.49    0.33
  -5  -1   4    3.75    0.48
  -5  -1   4    3.49    0.43
  -5  -1   4    4.58    0.68
  -5  -1   4    4.71    0.52
   4   1  -4  143.36    4.01
   4   1  -4  144.88    4.86
   4   1  -4  145.66    4.91
   4   1  -4  142.04    3.76
   4   1  -4  145.76    3.72
  -4  -1   4  147.78    4.74
  -4  -1   4  142.99    3.96
  -4  -1   4  144.54    3.86
  -4  -1   4  146.39    4.26
  -4  -1   4  138.81    4.27
   3   1  -4    9.12    0.59
   3   1  -4    8.88    0.58
   3   1  -4    9.03    0.68
   3   1  -4    7.75    0.69
   3   1  -4    9.03    0.50
  -3  -1   4    9.10    0.55
  -3  -1   4    8.59    0.64
  -3  -1   4    9.30    0.66
  -3  -1   4    8.95    0.61
  -3  -1   4    9.31    0.60
  -3  -1   4    8.72    0.53
   2   1  -4  291.69   10.11
   2   1  -4  314.82    7.88
   2   1  -4  312.44   10.09
   2   1  -4  323.70    8.32
  -2  -1   4  311.58   10.04
  -2  -1   4  314.20    8.82
  -2  -1   4  309.86    8.03
  -2  -1   4  316.90    8.29
  -2  -1   4  314.88   10.10
  -2  -1   4  323.42    8.02
  -2  -1   4  318.63    8.89
   1   1  -4   -0.02    0.35
   1   1  -4   -0.05    0.29
   1   1  -4   -0.19    0.36
  -1  -1   4    0.09    0.29
  -1  -1   4    0.19    0.36
  -1  -1   4    0.22    0.35
  -1  -1   4    0.16    0.27
  -1  -1   4    0.38    0.25
   0   1  -4    3.32    0.39
   0   1  -4    4.05    0.53
   0   1  -4    2.95    0.51
   0  -1   4    3.06    0.49
   0  -1   4    2.80    0.49
   0  -1   4    2.92    0.40
   0  -1   4    3.20    0.42
  -1   1  -4   18.84    0.87
  -1   1  -4   17.92    1.22
  -1   1  -4   20.82    1.19
  -1   1  -4   19.62    0.89
  -1   1  -4   18.98    1.00
  -1   1  -4   20.78    1.04
   1  -1   4   19.34    0.85
   1  -1   4   19.30    1.04
  -2   1  -4  156.35    4.97
  -2   1  -4  146.98    4.53
  -2   1  -4  145.97    5.03
  -2   1  -4  151.43    5.56
  -2   1  -4  146.30    5.15
  -2   1  -4  150.29    4.01
  -2   1  -4  144.25    4.22
  -2   1  -4  157.37    4.06
   2  -1   4  156.43    3.93
   2  -1   4  155.85    5.16
   2  -1   4  150.91    4.21
  -3   1  -4    5.86    0.84
  -3   1  -4    5.21    0.83
  -3   1  -4    5.37    0.47
  -3   1  -4    5.53    0.48
  -3   1  -4    5.69    0.69
  -3   1  -4    6.02    0.56
  -3   1  -4    5.18    0.62
  -3   1  -4    6.25    0.53
  -3   1  -4    5.55    0.74
   3  -1   4    6.57    0.57
   3  -1   4    7.05    0.78
   3  -1   4    5.77    0.44
   3  -1   4    5.17    0.54
  -4   1  -4  140.14    4.35
  -4   1  -4  143.60    4.35
  -4   1  -4  136.98    5.16
  -4   1  -4  139.02    4.90
  -4   1  -4  138.60    3.81
  -4   1  -4  139.58    3.79
  -4   1  -4  140.31    5.43
   4  -1   4  141.10    3.70
  -5   1  -4    2.26    0.65
  -5   1  -4    2.78    0.93
  -5   1  -4    2.42    0.43
  -5   1  -4    2.37    0.84
  -5   1  -4    2.46    0.88
  -5   1  -4    2.52    0.51
  -5   1  -4    2.64    0.60
   5  -1   4    2.98    0.42
  -6   1  -4   60.21    2.01
  -6   1  -4   56.67    3.08
  -6   1  -4   52.36    3.10
  -6   1  -4   58.39    1.89
  -6   1  -4   62.90    2.35
  -6   1  -4   58.64    2.88
   6  -1   4   57.67    1.88
  -7   1  -4   12.95    0.90
  -7   1  -4   12.00    1.67
  -7   1  -4   14.63    1.89
  -7   1  -4   15.14    1.07
   7  -1   4   12.87    0.90
  -8   1  -4    5.16    0.87
  -8   1  -4    5.41    1.60
  -8   1  -4    4.39    1.50
   8  -1   4    5.15    0.74
  -9   1  -4   31.06    2.86
  -9   1  -4   29.70    1.41
   9  -1   4   32.44    1.64
  10   0  -4    0.11    0.46
   9   0  -4    0.31    0.48
   9   0  -4    0.48    0.40
  -9   0   4    0.46    0.46
   8   0  -4    3.53    0.44
   8   0  -4    3.74    0.54
  -8   0   4    3.76    0.49
  -8   0   4    3.78    0.55
   7   0  -4    9.33    0.57
   7   0  -4    8.25    0.57
  -7   0   4    9.87    0.65
  -7   0   4   11.50    1.15
  -7   0   4    9.06    0.65
   6   0  -4   26.56    0.85
   6   0  -4   26.96    0.91
  -6   0   4   28.58    1.56
  -6   0   4   25.92    1.02
  -6   0   4   25.51    1.09
  -6   0   4   28.68    1.16
   5   0  -4   67.93    2.43
   5   0  -4   64.41    1.87
   5   0  -4   63.35    1.70
   5   0  -4   61.18    1.71
  -5   0   4   64.83    2.08
  -5   0   4   62.68    2.08
  -5   0   4   65.33    2.51
  -5   0   4   62.78    1.85
   4   0  -4   -0.13    0.18
   4   0  -4    0.95    0.38
   4   0  -4    0.48    0.22
   4   0  -4    0.48    0.34
   4   0  -4    0.51    0.45
  -4   0   4    0.13    0.33
  -4   0   4    0.09    0.26
  -4   0   4    0.67    0.30
  -4   0   4    0.45    0.37
  -4   0   4    0.54    0.50
   3   0  -4  182.35    6.24
   3   0  -4  189.66    4.75
   3   0  -4  184.71    5.11
   3   0  -4  189.34    4.76
   3   0  -4  192.14    6.19
  -3   0   4  183.77    5.46
  -3   0   4  188.05    6.01
  -3   0   4  187.81    4.87
  -3   0   4  193.49    5.44
  -3   0   4  188.76    4.88
  -3   0   4  189.91    6.02
   2   0  -4  247.65    6.24
   2   0  -4  252.66    6.24
   2   0  -4  247.72    6.62
   2   0  -4  235.30    8.06
  -2   0   4  243.19    7.98
  -2   0   4  248.18    7.97
  -2   0   4  245.54    6.60
  -2   0   4  251.33    7.09
  -2   0   4  253.02    6.37
  -2   0   4  251.87    6.37
  -2   0   4  245.41    7.03
   1   0  -4  321.04    8.65
   1   0  -4  315.91   10.53
  -1   0   4  321.97    8.64
  -1   0   4  333.87    9.26
  -1   0   4  330.84    8.34
  -1   0   4  328.12   10.52
  -1   0   4  336.73    8.39
  -1   0   4  329.78    9.19
  -1   0   4  321.00   10.49
   0   0  -4  458.96   15.04
   0   0  -4  475.18   14.67
   0   0  -4  466.50   12.35
   0   0   4  467.60   12.34
   0   0   4  470.00   13.12
   0   0   4  488.05   15.05
  -1   0  -4   16.04    0.96
  -1   0  -4   15.30    0.93
  -1   0  -4   16.02    0.78
  -1   0  -4   15.36    0.75
  -1   0  -4   17.41    1.01
  -1   0  -4   14.87    0.76
  -1   0  -4   15.63    0.97
  -1   0  -4   16.72    0.91
   1   0   4   17.29    0.84
   1   0   4   15.89    0.78
   1   0   4   15.47    0.95
  -2   0  -4  455.41   14.98
  -2   0  -4  478.11   11.94
  -2   0  -4  477.65   16.08
  -2   0  -4  466.70   13.24
  -2   0  -4  454.41   13.15
  -2   0  -4  448.13   12.32
  -2   0  -4  478.35   14.60
  -2   0  -4  467.31   11.94
  -2   0  -4  463.99   14.86
   2   0   4  469.26   12.34
   2   0   4  476.57   12.36
   2   0   4  489.13   15.07
   2   0   4  472.50   11.72
  -3   0  -4    2.48    0.63
  -3   0  -4    1.89    0.37
  -3   0  -4    2.47    0.43
  -3   0  -4    2.50    0.73
  -3   0  -4    1.75    0.44
  -3   0  -4    1.54    0.70
  -3   0  -4    2.14    0.51
  -3   0  -4    2.37    0.53
   3   0   4    2.17    0.60
   3   0   4    2.32    0.38
   3   0   4    2.44    0.43
   3   0   4    1.97    0.42
  -4   0  -4   61.75    1.87
  -4   0  -4   62.00    2.21
  -4   0  -4   60.94    2.61
  -4   0  -4   57.57    2.68
  -4   0  -4   62.60    1.96
  -4   0  -4   59.69    2.77
  -4   0  -4   59.70    2.21
   4   0   4   61.84    1.86
  -5   0  -4   42.62    1.77
  -5   0  -4   40.86    1.55
  -5   0  -4   39.44    2.26
  -5   0  -4   42.41    2.35
  -5   0  -4   42.38    1.44
  -5   0  -4   38.52    1.72
  -5   0  -4   36.05    2.14
   5   0   4   41.97    1.46
  -6   0  -4    2.58    0.54
  -6   0  -4    3.30    0.77
  -6   0  -4    4.20    1.22
  -6   0  -4    4.04    1.17
  -6   0  -4    3.25    0.72
  -6   0  -4    3.45    0.67
   6   0   4    2.90    0.53
  -7   0  -4    9.09    1.55
  -7   0  -4   11.78    1.20
  -7   0  -4    9.23    1.59
  -7   0  -4   10.58    1.08
  -7   0  -4   11.77    1.02
   7   0   4   11.69    0.92
  -8   0  -4    8.99    1.77
   8   0   4    8.71    0.93
  -9   0  -4    1.82    1.60
  -9   0  -4    1.76    0.81
  10  -1  -4   -0.15    0.39
   9  -1  -4   26.68    1.02
   9  -1  -4   27.90    1.17
  -9   1   4   27.60    1.98
  -9   1   4   30.22    1.19
   8  -1  -4   -0.18    0.27
   8  -1  -4    0.25    0.36
  -8   1   4   -0.19    0.42
  -8   1   4    0.06    0.84
  -7   1   4  129.63    3.48
  -7   1   4  126.12    4.68
  -7   1   4  128.88    3.77
  -6   1   4   18.02    1.31
  -6   1   4   14.74    0.80
  -6   1   4   17.54    0.71
   5  -1  -4  113.18    3.90
   5  -1  -4  113.52    3.03
  -5   1   4  110.05    3.36
  -5   1   4  109.32    2.94
  -5   1   4  113.91    3.00
  -5   1   4  107.08    3.96
  -5   1   4  114.14    3.37
   4  -1  -4  129.56    3.39
   4  -1  -4  139.20    4.57
   4  -1  -4  136.39    3.73
   4  -1  -4  139.61    4.63
   4  -1  -4  133.80    3.40
  -4   1   4  140.17    3.68
  -4   1   4  134.10    4.01
  -4   1   4  132.74    4.61
  -4   1   4  135.95    3.53
  -4   1   4  133.73    4.03
   3  -1  -4   -0.16    0.37
   3  -1  -4    0.41    0.20
   3  -1  -4    0.45    0.31
   3  -1  -4    0.31    0.19
  -3   1   4    0.35    0.17
  -3   1   4    0.54    0.25
  -3   1   4    1.22    0.52
  -3   1   4    0.17    0.28
  -3   1   4    0.68    0.35
  -3   1   4    0.32    0.18
  -3   1   4    0.53    0.24
  -3   1   4    0.30    0.33
   2  -1  -4  229.93    6.16
   2  -1  -4  224.86    7.50
   2  -1  -4  226.10    5.80
   2  -1  -4  230.98    5.78
  -2   1   4  227.28    6.58
  -2   1   4  228.77    7.38
  -2   1   4  230.42    7.41
  -2   1   4  227.85    6.53
  -2   1   4  231.01    6.17
  -2   1   4  228.03    5.93
  -2   1   4  234.05    5.89
   1  -1  -4  173.65    5.85
   1  -1  -4  173.85    4.81
  -1   1   4  176.57    4.67
  -1   1   4  172.40    4.58
  -1   1   4  174.61    5.79
  -1   1   4  178.68    5.13
  -1   1   4  177.74    4.82
  -1   1   4  175.89    5.08
   0  -1  -4   67.37    2.13
   0  -1  -4   68.06    2.34
   0  -1  -4   71.85    2.50
   0  -1  -4   70.75    2.40
   0  -1  -4   68.37    2.60
   0   1   4   68.37    2.56
   0   1   4   71.68    2.13
   0   1   4   70.23    2.26
  -1  -1  -4  158.22    5.31
  -1  -1  -4  164.16    4.81
  -1  -1  -4  157.94    4.31
  -1  -1  -4  154.77    4.77
  -1  -1  -4  159.44    4.48
  -1  -1  -4  161.17    5.48
  -1  -1  -4  165.67    5.60
   1   1   4  166.13    5.47
   1   1   4  164.67    4.74
   1   1   4  163.88    4.50
   1   1   4  157.99    4.47
  -2  -1  -4    6.54    0.56
  -2  -1  -4    6.57    0.63
  -2  -1  -4    6.38    0.72
  -2  -1  -4    8.33    0.82
  -2  -1  -4    7.49    0.66
  -2  -1  -4    6.43    0.52
  -2  -1  -4    6.38    0.63
  -2  -1  -4    6.96    0.57
  -2  -1  -4    7.34    0.94
   2   1   4    7.42    0.64
   2   1   4    7.42    0.53
   2   1   4    7.74    0.60
   2   1   4    7.40    0.60
   2   1   4    8.96    0.82
  -3  -1  -4    9.36    0.62
  -3  -1  -4    9.60    0.71
  -3  -1  -4    8.82    0.76
  -3  -1  -4   10.26    0.92
  -3  -1  -4    9.33    0.83
  -3  -1  -4    7.46    0.94
  -3  -1  -4   11.88    1.19
  -3  -1  -4   10.04    0.68
  -3  -1  -4    7.92    0.72
   3   1   4   10.75    0.76
   3   1   4   10.65    0.66
   3   1   4   10.37    0.73
   3   1   4    8.67    0.68
   3   1   4    9.40    0.90
  -4  -1  -4   47.42    1.88
  -4  -1  -4   47.61    1.87
  -4  -1  -4   49.41    1.60
  -4  -1  -4   45.86    2.29
  -4  -1  -4   45.88    2.31
  -4  -1  -4   44.00    2.40
  -4  -1  -4   48.90    1.69
   4   1   4   47.35    1.61
  -5  -1  -4   10.91    1.35
  -5  -1  -4    8.77    1.22
  -5  -1  -4   10.56    0.92
  -5  -1  -4   11.09    0.76
  -5  -1  -4   13.09    0.91
  -5  -1  -4   11.29    0.95
   5   1   4   12.83    0.82
  -6  -1  -4   67.67    2.37
  -6  -1  -4   66.13    3.39
  -6  -1  -4   64.78    3.32
  -6  -1  -4   68.11    2.59
  -6  -1  -4   61.20    2.51
   6   1   4   69.26    2.24
  -7  -1  -4    9.93    1.65
  -7  -1  -4   11.85    1.21
  -7  -1  -4   10.64    1.11
   7   1   4   12.25    0.98
  -8  -1  -4   13.78    1.26
  -8  -1  -4   13.27    2.04
  -9  -1  -4    2.25    1.58
  10  -2  -4    0.58    0.44
  10  -2  -4    0.97    0.37
   9  -2  -4    7.31    0.48
  -9   2   4    8.30    0.65
  -9   2   4    8.47    1.36
  -9   2   4    7.53    0.58
  -8   2   4    1.06    0.92
  -8   2   4    0.43    0.40
  -7   2   4   -0.19    0.25
  -7   2   4    0.04    0.30
  -7   2   4    0.57    0.78
  -7   2   4    0.24    0.28
  -6   2   4    1.76    0.36
  -6   2   4    1.38    0.70
  -6   2   4    1.77    0.41
  -6   2   4    1.37    0.26
   5  -2  -4   76.20    2.75
  -5   2   4   73.42    2.00
  -5   2   4   75.99    2.38
  -5   2   4   70.43    2.36
  -5   2   4   72.00    1.99
  -5   2   4   72.07    2.88
  -5   2   4   76.85    2.40
   4  -2  -4   36.74    1.58
   4  -2  -4   33.94    0.99
   4  -2  -4   34.84    1.00
   4  -2  -4   37.23    1.19
  -4   2   4   35.56    1.11
  -4   2   4   35.15    1.09
  -4   2   4   36.76    1.72
  -4   2   4   34.44    1.36
  -4   2   4   37.02    1.16
  -4   2   4   37.52    1.39
  -4   2   4   38.93    1.21
  -4   2   4   38.85    1.43
   3  -2  -4  392.10    9.67
   3  -2  -4  385.22    9.63
   3  -2  -4  382.66   12.44
   3  -2  -4  397.38   10.19
  -3   2   4  390.76   10.86
  -3   2   4  383.02    9.82
  -3   2   4  390.74    9.88
  -3   2   4  389.87   12.14
  -3   2   4  385.42   10.18
  -3   2   4  393.43   10.23
  -3   2   4  380.76   10.95
   2  -2  -4   22.97    1.14
   2  -2  -4   22.45    0.91
   2  -2  -4   23.52    0.96
   2  -2  -4   23.03    0.82
  -2   2   4   24.15    0.98
  -2   2   4   22.04    1.00
  -2   2   4   23.61    0.94
  -2   2   4   24.70    1.01
  -2   2   4   23.63    1.03
  -2   2   4   22.98    1.13
  -2   2   4   22.70    0.85
  -2   2   4   23.26    0.93
   1  -2  -4  116.71    3.36
   1  -2  -4  116.46    3.61
   1  -2  -4  115.60    4.08
  -1   2   4  118.26    4.02
  -1   2   4  118.99    3.18
  -1   2   4  121.07    3.28
  -1   2   4  122.99    3.37
  -1   2   4  116.64    3.52
  -1   2   4  114.71    3.35
  -1   2   4  118.27    3.56
   0  -2  -4    9.64    0.63
   0  -2  -4    9.87    0.73
   0  -2  -4    9.99    0.81
   0   2   4   10.19    0.70
   0   2   4   10.70    0.62
   0   2   4   10.65    0.81
   0   2   4   11.38    0.66
  -1  -2  -4   22.97    1.01
  -1  -2  -4   23.16    1.12
  -1  -2  -4   23.57    1.16
  -1  -2  -4   22.86    1.23
   1   2   4   25.52    1.26
   1   2   4   24.61    1.03
   1   2   4   23.04    0.99
   1   2   4   25.83    1.15
  -2  -2  -4   42.42    1.55
  -2  -2  -4   44.05    1.91
  -2  -2  -4   44.22    1.47
  -2  -2  -4   45.23    1.74
  -2  -2  -4   39.11    2.26
  -2  -2  -4   42.80    1.53
  -2  -2  -4   44.02    1.95
  -2  -2  -4   45.39    1.70
   2   2   4   45.62    1.58
   2   2   4   42.66    1.67
   2   2   4   42.16    1.54
   2   2   4   46.03    1.94
  -3  -2  -4  129.63    4.01
  -3  -2  -4  125.99    3.72
  -3  -2  -4  124.46    3.61
  -3  -2  -4  128.07    4.01
  -3  -2  -4  126.24    4.64
  -3  -2  -4  127.43    4.52
  -3  -2  -4  117.76    4.66
   3   2   4  128.56    3.73
   3   2   4  127.43    3.91
   3   2   4  130.96    4.58
   3   2   4  129.45    3.51
  -4  -2  -4   23.88    1.17
  -4  -2  -4   18.58    1.67
  -4  -2  -4   22.30    1.61
  -4  -2  -4   18.93    1.25
  -4  -2  -4   21.45    1.25
   4   2   4   21.19    1.10
  -5  -2  -4  114.25    4.60
  -5  -2  -4  116.53    3.81
  -5  -2  -4  114.24    3.81
  -6  -2  -4    6.07    0.89
  -6  -2  -4    6.37    0.93
  -6  -2  -4    5.01    1.38
  -7  -2  -4   33.62    1.85
  -7  -2  -4   33.65    2.70
  -7  -2  -4   36.46    1.94
  -8  -2  -4   20.00    2.41
  -8  -2  -4   24.74    1.72
  -8  -2  -4   23.48    1.59
  -9  -2  -4    4.32    1.72
  10  -3  -4    1.93    0.38
 -10   3   4    2.34    1.17
  -9   3   4    2.99    0.51
  -9   3   4    3.62    0.46
  -9   3   4    4.26    1.20
  -8   3   4    2.06    0.40
  -8   3   4    1.74    0.36
  -8   3   4    1.62    0.99
  -7   3   4   30.04    0.98
  -7   3   4   29.13    0.98
  -7   3   4   31.65    1.94
  -6   3   4   41.87    1.41
  -6   3   4   38.22    1.18
  -6   3   4   40.26    1.43
  -6   3   4   39.59    2.10
  -6   3   4   39.59    1.21
   5  -3  -4   12.75    0.90
  -5   3   4   12.85    0.89
  -5   3   4   11.38    0.76
  -5   3   4   11.71    0.59
  -5   3   4    9.33    1.07
  -5   3   4   10.18    0.54
   4  -3  -4   64.77    1.84
   4  -3  -4   64.57    1.81
   4  -3  -4   71.49    2.56
  -4   3   4   68.59    1.98
  -4   3   4   70.59    2.22
  -4   3   4   69.48    1.98
  -4   3   4   67.73    2.24
  -4   3   4   67.58    1.89
  -4   3   4   67.08    2.73
   3  -3  -4   12.99    0.76
   3  -3  -4   11.01    0.65
   3  -3  -4   13.00    0.86
   3  -3  -4   12.51    0.60
  -3   3   4   12.98    0.52
  -3   3   4   15.29    1.14
  -3   3   4   12.60    0.66
  -3   3   4   12.16    0.76
  -3   3   4   12.80    0.80
  -3   3   4   13.79    0.66
  -3   3   4   12.08    0.76
  -3   3   4   13.47    0.72
   2  -3  -4   62.13    2.42
   2  -3  -4   64.80    1.83
   2  -3  -4   65.38    2.01
   2  -3  -4   66.62    2.00
  -2   3   4   67.29    2.02
  -2   3   4   64.77    2.31
  -2   3   4   65.31    1.89
  -2   3   4   63.19    2.02
  -2   3   4   63.66    2.14
  -2   3   4   63.25    2.09
  -2   3   4   62.93    1.99
   1  -3  -4  203.92    7.04
   1  -3  -4  210.16    6.20
   1  -3  -4  217.34    5.81
  -1   3   4  223.26    6.20
  -1   3   4  216.34    6.99
  -1   3   4  203.94    5.61
  -1   3   4  210.14    6.13
  -1   3   4  210.96    5.79
  -1   3   4  215.59    5.56
  -1   3   4  211.18    5.80
   0  -3  -4    7.74    0.61
   0  -3  -4    8.36    0.71
   0  -3  -4    6.87    0.72
   0   3   4    7.35    0.61
   0   3   4    6.31    0.56
   0   3   4    8.00    0.72
   0   3   4   10.77    0.73
   0   3   4    7.99    0.62
  -1  -3  -4  674.09   19.09
  -1  -3  -4  686.17   17.91
   1   3   4  687.31   19.03
   1   3   4  674.65   17.89
   1   3   4  696.14   17.92
   1   3   4  687.63   21.82
  -2  -3  -4    3.50    0.64
  -2  -3  -4    3.64    0.52
  -2  -3  -4    4.29    0.73
  -2  -3  -4    3.24    0.63
   2   3   4    4.10    0.73
   2   3   4    4.41    0.55
   2   3   4    3.78    0.59
   2   3   4    2.64    0.51
  -3  -3  -4  210.72    6.42
  -3  -3  -4  219.60    6.47
  -3  -3  -4  197.96    7.47
  -3  -3  -4  217.92    7.35
   3   3   4  212.75    6.34
   3   3   4  228.37    7.40
  -4  -3  -4   27.73    1.46
  -4  -3  -4   28.31    2.03
  -4  -3  -4   32.69    1.57
  -5  -3  -4    5.10    0.85
  -5  -3  -4    4.72    0.79
  -5  -3  -4    3.71    1.18
  -6  -3  -4   18.45    1.40
  -6  -3  -4   20.83    1.46
  -6  -3  -4   22.05    2.16
  -7  -3  -4    3.74    1.48
  -7  -3  -4    3.88    0.93
  -7  -3  -4    3.15    0.96
  -8  -3  -4    8.96    1.32
  -8  -3  -4    8.70    1.20
  -8  -3  -4    8.32    1.92
  -9  -3  -4    4.64    1.78
  -9  -3  -4    4.79    1.15
 -10   4   4   11.43    1.68
  -9   4   4   -0.17    0.44
  -9   4   4    0.64    1.04
  -9   4   4    0.19    0.43
  -8   4   4   40.07    1.31
  -8   4   4   43.07    1.40
  -8   4   4   37.68    2.41
  -7   4   4    0.20    0.81
  -7   4   4    0.01    0.30
  -7   4   4    0.58    0.39
   6  -4  -4   50.04    1.37
   6  -4  -4   50.56    1.40
  -6   4   4   51.34    1.50
  -6   4   4   50.07    1.59
  -6   4   4   48.21    1.78
  -6   4   4   49.18    2.48
   5  -4  -4   22.00    0.76
   5  -4  -4   21.65    0.83
  -5   4   4   22.40    0.86
  -5   4   4   21.57    1.44
  -5   4   4   22.00    1.08
  -5   4   4   23.27    1.11
  -5   4   4   23.80    0.98
   4  -4  -4   19.34    0.75
   4  -4  -4   20.15    1.12
   4  -4  -4   20.70    0.95
  -4   4   4   21.27    1.06
  -4   4   4   17.38    1.35
  -4   4   4   17.76    0.79
  -4   4   4   19.26    0.93
  -4   4   4   18.71    0.97
   3  -4  -4  202.04    5.26
   3  -4  -4  206.73    6.85
   3  -4  -4  204.90    5.40
  -3   4   4  205.66    5.57
  -3   4   4  206.39    5.48
  -3   4   4  207.22    5.95
  -3   4   4  201.93    6.53
  -3   4   4  197.66    5.98
  -3   4   4  202.97    6.79
  -3   4   4  217.87    6.52
  -3   4   4  199.44    5.36
   2  -4  -4    0.88    0.33
   2  -4  -4    0.57    0.46
   2  -4  -4    0.48    0.37
  -2   4   4    0.66    0.37
  -2   4   4    0.74    0.40
  -2   4   4    0.16    0.35
  -2   4   4   -0.03    0.34
  -2   4   4    0.35    0.34
  -2   4   4   -0.20    0.36
  -2   4   4    0.24    0.59
   1  -4  -4  148.26    5.25
   1  -4  -4  155.45    4.34
   1  -4  -4  147.33    4.58
  -1   4   4  157.34    4.33
  -1   4   4  154.75    4.58
  -1   4   4  153.36    4.31
  -1   4   4  152.24    4.11
  -1   4   4  146.66    4.53
   0  -4  -4    0.98    0.49
   0  -4  -4    1.56    0.55
   0  -4  -4    2.56    0.47
   0  -4  -4    1.07    0.47
   0   4   4    1.63    0.46
   0   4   4    1.88    0.45
   0   4   4    2.38    0.49
   0   4   4    1.89    0.46
  -1  -4  -4    2.74    0.52
  -1  -4  -4    2.10    0.53
  -1  -4  -4    2.89    0.62
  -1  -4  -4    2.01    0.61
  -1  -4  -4    2.74    0.60
   1   4   4    3.12    0.54
   1   4   4    3.98    0.56
   1   4   4    1.70    0.47
   1   4   4    2.56    0.54
  -2  -4  -4   11.36    0.93
  -2  -4  -4   10.81    1.04
  -2  -4  -4   12.56    0.84
  -2  -4  -4   13.05    0.99
  -2  -4  -4   14.20    0.94
   2   4   4   12.60    0.92
   2   4   4   12.77    0.87
   2   4   4   13.22    0.87
  -3  -4  -4   29.11    1.46
  -3  -4  -4   26.06    2.14
  -3  -4  -4   30.23    1.51
   3   4   4   27.16    1.43
  -4  -4  -4    0.78    0.62
  -4  -4  -4    0.40    0.61
  -4  -4  -4    1.11    1.00
  -5  -4  -4   73.09    3.76
  -5  -4  -4   81.11    2.98
  -5  -4  -4   80.49    3.02
  -6  -4  -4    2.40    1.37
  -6  -4  -4    3.09    0.90
  -6  -4  -4    2.48    0.92
  -7  -4  -4   15.94    2.22
  -7  -4  -4   18.35    1.56
  -7  -4  -4   17.44    1.51
  -8  -4  -4    0.53    0.92
  -8  -4  -4    0.78    1.55
  -8  -4  -4   -0.85    0.91
   9  -5  -4   -0.83    0.39
  -9   5   4    0.39    1.11
   8  -5  -4    5.21    0.51
  -8   5   4    5.28    1.29
  -8   5   4    5.76    0.62
  -8   5   4    6.03    0.51
   7  -5  -4    0.20    0.37
   7  -5  -4    0.29    0.28
  -7   5   4   -0.07    0.45
  -7   5   4   -0.09    0.92
  -7   5   4    0.15    0.36
   6  -5  -4    3.52    0.50
  -6   5   4    2.71    0.53
  -6   5   4    3.29    0.44
  -6   5   4    3.58    0.58
  -6   5   4    3.99    1.06
   5  -5  -4    4.13    0.40
   5  -5  -4    3.82    0.56
  -5   5   4    3.42    0.55
  -5   5   4    3.47    0.89
  -5   5   4    4.25    0.55
  -5   5   4    4.64    0.60
  -5   5   4    3.53    0.44
   4  -5  -4   55.36    1.66
  -4   5   4   57.31    1.80
  -4   5   4   54.22    1.95
  -4   5   4   48.88    1.91
  -4   5   4   51.88    2.42
  -4   5   4   54.65    1.70
   3  -5  -4    7.18    0.79
   3  -5  -4    8.64    0.57
  -3   5   4    7.07    0.66
  -3   5   4    6.31    0.64
  -3   5   4    7.97    0.58
  -3   5   4    7.05    0.90
  -3   5   4    6.91    0.62
   2  -5  -4   75.84    2.95
  -2   5   4   75.42    2.29
  -2   5   4   80.23    2.35
  -2   5   4   76.36    2.95
  -2   5   4   76.02    2.54
  -2   5   4   72.51    2.51
   1  -5  -4    6.88    0.73
   1  -5  -4    6.03    0.77
   1  -5  -4    6.11    0.64
  -1   5   4    6.12    0.62
  -1   5   4    6.27    0.65
  -1   5   4    4.96    0.61
   0  -5  -4   15.56    0.93
   0  -5  -4   16.40    0.98
   0  -5  -4   15.69    1.19
   0  -5  -4   16.51    1.08
   0   5   4   17.24    0.95
   0   5   4   14.56    1.07
   0   5   4   16.33    0.96
   0   5   4   16.46    1.02
  -1  -5  -4   55.04    2.17
  -1  -5  -4   55.84    1.99
  -1  -5  -4   55.08    2.03
  -1  -5  -4   56.42    2.43
   1   5   4   54.68    1.98
   1   5   4   53.24    1.94
   1   5   4   50.89    2.00
  -2  -5  -4   30.31    1.43
  -2  -5  -4   27.60    1.47
  -2  -5  -4   30.14    1.63
  -2  -5  -4   25.34    1.61
   2   5   4   29.68    1.39
   2   5   4   30.76    1.51
  -3  -5  -4   12.03    1.07
  -3  -5  -4   10.69    1.00
  -3  -5  -4    9.51    1.59
   3   5   4   12.35    1.00
  -4  -5  -4   44.84    2.04
  -4  -5  -4   40.28    2.92
  -4  -5  -4   48.31    2.19
  -5  -5  -4    5.70    1.58
  -5  -5  -4    3.70    0.91
  -5  -5  -4    3.09    0.85
  -6  -5  -4   14.27    1.40
  -6  -5  -4   14.47    2.10
  -6  -5  -4   15.94    1.49
  -7  -5  -4    7.66    1.21
  -7  -5  -4    7.12    1.89
  -7  -5  -4    6.69    1.22
  -8  -5  -4    1.59    1.05
  -8  -5  -4    1.58    1.03
  -8  -5  -4    1.44    1.61
   9  -6  -4    0.02    0.37
  -9   6   4   -0.34    1.15
   8  -6  -4    4.48    0.49
  -8   6   4    4.61    1.34
  -8   6   4    6.29    0.59
  -8   6   4    6.24    0.62
   7  -6  -4    8.34    0.61
  -7   6   4    9.00    0.74
  -7   6   4   10.61    0.71
  -7   6   4    9.36    1.37
  -7   6   4    9.89    0.74
   6  -6  -4   15.75    0.85
  -6   6   4   16.41    0.93
  -6   6   4   16.52    1.06
  -6   6   4   15.47    1.58
  -6   6   4   15.80    0.90
   5  -6  -4   16.68    0.85
  -5   6   4   15.95    1.12
  -5   6   4   16.91    0.92
  -5   6   4   16.06    0.93
  -5   6   4   14.30    1.00
  -5   6   4   15.51    1.47
   4  -6  -4    4.18    0.49
  -4   6   4    5.83    0.65
  -4   6   4    5.29    0.55
  -4   6   4    6.30    1.01
  -4   6   4    4.05    0.56
  -4   6   4    5.12    0.63
  -3   6   4   19.07    1.40
  -3   6   4   19.59    1.12
  -3   6   4   20.65    1.05
  -3   6   4   19.71    1.16
  -2   6   4   35.71    1.60
  -2   6   4   36.36    1.83
  -2   6   4   35.56    1.58
   1  -6  -4   11.00    0.93
  -1   6   4    9.55    0.99
  -1   6   4    9.77    0.85
  -1   6   4    9.59    0.87
   0  -6  -4  216.94    6.56
   0  -6  -4  214.35    7.50
   0   6   4  223.07    6.14
   0   6   4  203.81    6.46
   0   6   4  223.31    6.54
  -1  -6  -4    1.44    0.69
  -1  -6  -4    1.31    0.62
   1   6   4    1.66    0.55
  -2  -6  -4  153.29    4.95
   2   6   4  154.90    4.84
  -3  -6  -4   10.93    1.11
  -3  -6  -4    8.47    1.72
   3   6   4   10.19    1.03
  -4  -6  -4   30.37    1.76
  -4  -6  -4   28.21    1.67
  -4  -6  -4   23.82    2.47
  -5  -6  -4   18.80    2.33
  -5  -6  -4   21.93    1.58
  -5  -6  -4   24.39    1.76
  -6  -6  -4    1.21    0.93
  -6  -6  -4   -0.48    0.89
  -6  -6  -4   -0.63    1.37
  -7  -6  -4   15.81    1.58
  -7  -6  -4   16.70    1.62
  -7  -6  -4   12.19    2.15
  -8  -6  -4    1.56    1.60
  -8  -6  -4    2.26    1.12
  -8  -6  -4    4.20    1.20
   9  -7  -4   10.15    0.73
  -9   7   4   13.19    1.85
  -8   7   4    0.56    0.48
  -8   7   4    0.39    1.16
  -8   7   4    0.17    0.49
  -7   7   4   45.48    1.66
  -7   7   4   41.46    1.75
  -7   7   4   45.95    2.72
  -7   7   4   49.05    1.68
   6  -7  -4    9.26    0.71
  -6   7   4    8.71    0.78
  -6   7   4    7.49    0.72
  -6   7   4    8.24    0.82
  -6   7   4    8.84    1.39
  -5   7   4   26.50    1.25
  -5   7   4   24.65    1.85
  -5   7   4   27.10    1.40
  -5   7   4   22.85    1.30
  -4   7   4   56.98    2.78
  -4   7   4   63.18    2.32
  -4   7   4   65.07    2.18
  -4   7   4   63.77    2.36
  -3   7   4    1.86    0.61
  -3   7   4    0.84    0.75
  -3   7   4    1.00    0.55
  -2   7   4   88.59    3.13
  -2   7   4   92.57    3.17
  -2   7   4   93.62    3.54
  -1   7   4    8.89    0.92
  -1   7   4    9.47    1.03
  -1   7   4    7.09    0.83
   0  -7  -4   39.16    1.90
   0   7   4   40.22    1.92
   0   7   4   36.99    1.81
   0   7   4   39.92    1.86
  -1  -7  -4    5.44    0.87
   1   7   4    4.23    0.79
  -2  -7  -4   -0.49    0.69
   2   7   4    0.89    0.65
  -3  -7  -4   -0.85    0.70
  -3  -7  -4   -0.15    1.30
   3   7   4    0.17    0.70
  -4  -7  -4   20.31    2.41
  -4  -7  -4   24.71    1.74
  -5  -7  -4    4.78    1.61
  -5  -7  -4    5.32    1.13
  -6  -7  -4   18.53    2.48
  -6  -7  -4   22.97    1.94
  -6  -7  -4   22.68    1.89
  -7  -7  -4    1.48    1.12
  -7  -7  -4    0.80    1.05
  -7  -7  -4    2.05    1.63
  -8   8   4   -0.35    1.26
  -7   8   4   -0.48    0.58
  -7   8   4    1.37    0.60
  -7   8   4    0.97    1.04
  -6   8   4    4.70    1.24
  -6   8   4    5.84    0.78
  -5   8   4   17.48    1.22
  -5   8   4   16.96    1.69
  -5   8   4   16.17    1.19
  -4   8   4   11.30    1.00
  -4   8   4    9.38    0.94
  -4   8   4    8.51    1.20
  -3   8   4   47.45    2.03
  -3   8   4   48.40    2.08
  -3   8   4   47.33    2.36
  -2   8   4    1.23    0.63
  -2   8   4    2.34    0.84
  -2   8   4    1.50    0.67
  -1   8   4   11.41    1.08
  -1   8   4   13.86    1.28
  -1   8   4   14.01    1.18
   0  -8  -4   11.16    1.21
   0   8   4   12.93    1.17
  -1  -8  -4    6.93    1.03
   1   8   4    8.52    1.02
  -2  -8  -4   25.25    1.70
   2   8   4   28.65    1.76
  -3  -8  -4   10.44    2.05
  -3  -8  -4   10.65    1.30
   3   8   4   13.89    1.35
  -4  -8  -4    3.83    1.04
  -4  -8  -4    3.39    1.69
  -5  -8  -4    5.40    1.88
  -5  -8  -4    8.37    1.37
  -6  -8  -4    1.59    1.71
  -6  -8  -4    0.42    1.01
  -7   9   4    9.67    1.60
  -7   9   4   10.54    0.96
  -6   9   4    2.76    1.17
  -6   9   4    4.27    0.77
  -5   9   4    3.11    1.14
  -5   9   4    1.98    0.71
  -5   9   4    1.57    0.75
  -4   9   4    5.42    1.16
  -4   9   4    7.80    0.97
  -4   9   4    7.48    0.93
  -3   9   4    6.17    0.91
  -3   9   4    6.81    0.97
  -3   9   4    4.98    1.11
  -2   9   4    2.50    0.80
  -2   9   4    1.65    0.86
  -2   9   4    0.52    0.67
  -1   9   4   30.34    1.70
  -1   9   4   34.55    1.88
   0   9   4    0.13    0.70
  -1  -9  -4   52.25    2.59
   1   9   4   56.82    2.52
  -2  -9  -4    1.66    1.00
   2   9   4    2.51    0.86
  -3  -9  -4   28.34    2.92
  -3  -9  -4   40.39    2.27
   3   9   4   39.06    2.22
  -4  -9  -4   11.81    2.18
  -4  -9  -4   17.12    1.72
  -5  -9  -4    3.31    1.25
  -5  -9  -4    1.15    1.60
  -6  -9  -4   17.47    2.46
  -7  10   4    0.48    1.20
  -7  10   4   -0.35    0.66
  -6  10   4    9.00    1.00
  -6  10   4    7.31    1.49
  -5  10   4    9.33    1.49
  -5  10   4    9.62    1.08
  -5  10   4    9.20    1.12
  -4  10   4    4.04    0.93
  -4  10   4    2.17    1.07
  -4  10   4    2.46    0.82
  -3  10   4   39.34    2.20
  -3  10   4   35.99    1.92
  -3  10   4   34.84    1.94
  -2  10   4    0.41    0.79
  -2  10   4    1.19    0.81
  -1  10   4   20.28    1.49
   0  10   4   -0.36    0.74
  -1 -10  -4    2.95    1.08
   1  10   4    1.98    0.94
  -2 -10  -4   -0.13    0.99
  -2 -10  -4    1.04    1.64
   2  10   4   -0.14    0.91
  -3 -10  -4    4.35    1.23
  -3 -10  -4    3.99    1.85
   3  10   4    5.86    1.22
  -4 -10  -4    1.21    1.68
  -4 -10  -4    0.79    1.15
  -5 -10  -4   11.58    1.67
  -5 -10  -4    9.92    2.18
  -6  11   4    0.95    1.22
  -6  11   4    0.08    0.73
  -5  11   4    3.50    1.29
  -5  11   4    2.47    0.84
  -5  11   4    2.40    0.96
  -4  11   4    8.59    1.41
  -4  11   4    7.50    1.12
  -4  11   4    8.92    1.18
  -3  11   4    1.88    0.93
  -3  11   4    1.07    0.84
  -2  11   4    8.94    1.21
  -2  11   4   10.62    1.28
  -1  11   4    1.38    0.90
   0  11   4    0.81    0.89
   1  11   4   12.31    1.44
  -2 -11  -4    2.96    1.20
  -2 -11  -4    2.91    1.76
   2  11   4    3.23    1.15
  -3 -11  -4    3.05    1.82
  -3 -11  -4    2.90    1.26
   3  11   4    3.63    1.25
  -4 -11  -4    3.65    1.85
  -4 -11  -4    5.20    1.38
  -4  12   4    1.30    0.96
  -4  12   4    1.79    0.95
  -3  12   4   -0.24    0.85
  -3  12   4   -0.27    0.90
  -2  12   4    4.78    1.16
  -2  12   4    4.11    1.06
  -1  12   4    1.03    0.92
   0  12   4   22.04    1.80
  -1 -12  -4    0.85    1.78
   1  12   4    0.32    1.02
  -2 -12  -4   23.52    2.82
   2  12   4   22.27    1.99
   3  13  -5    1.85    1.22
  -3 -13   5    0.58    1.10
   2  13  -5    3.17    1.22
   1  13  -5    2.17    1.12
   0  13  -5   -0.21    0.95
  -1  13  -5   15.88    1.62
  -2  13  -5    0.84    0.98
  -2  13  -5    1.29    1.06
  -3  13  -5    5.58    1.19
  -3  13  -5    6.30    1.23
  -5 -12   5   -0.04    1.08
  -4 -12   5   -0.32    1.01
   3  12  -5    0.93    1.08
  -3 -12   5    1.09    1.05
   2  12  -5   10.88    1.46
  -2 -12   5    9.39    1.37
   1  12  -5    2.03    1.01
   1  12  -5    0.57    1.66
   0  12  -5   20.54    1.73
   0  12  -5   23.07    2.60
  -1  12  -5    1.35    0.95
  -1  12  -5    3.16    1.62
  -2  12  -5   24.11    2.79
  -2  12  -5   24.62    1.89
  -2  12  -5   28.42    1.88
  -3  12  -5    9.94    2.06
  -3  12  -5    7.02    1.21
  -3  12  -5    7.42    1.20
  -4  12  -5    6.08    1.10
  -4  12  -5    5.69    1.14
  -5  12  -5   22.14    1.74
  -5  12  -5   20.39    2.68
  -6 -11   5    8.73    1.47
  -5 -11   5    2.55    1.12
  -4 -11   5   26.64    1.94
   3  11  -5    0.03    0.94
  -3 -11   5    1.63    0.97
   1  11  -5    2.85    0.99
  -1 -11   5    3.29    0.98
   0  11  -5   22.26    1.73
   0  11  -5   19.78    2.49
  -1  11  -5    7.02    1.21
  -1  11  -5   13.14    2.10
  -1  11  -5    9.48    1.23
  -2  11  -5    1.08    0.82
  -2  11  -5    1.53    0.93
  -2  11  -5    0.93    1.36
  -3  11  -5    1.83    0.91
  -3  11  -5    3.41    1.61
  -3  11  -5    2.96    0.96
  -4  11  -5   11.61    1.29
  -4  11  -5    7.42    1.13
  -4  11  -5   10.43    2.08
  -5  11  -5   -0.96    0.76
  -5  11  -5   -0.08    1.47
  -5  11  -5    0.49    0.90
  -6  11  -5    8.38    1.98
  -7 -10   5    2.06    1.08
  -6 -10   5   10.96    1.48
  -5 -10   5    0.48    0.97
  -4 -10   5    4.11    1.00
   3  10  -5   12.50    1.32
  -3 -10   5   11.62    1.33
   2  10  -5    5.53    1.03
  -2 -10   5    5.86    1.02
   1  10  -5    2.92    0.89
  -1 -10   5    1.83    0.87
   0  10  -5   45.04    2.26
  -1  10  -5    1.39    1.30
  -1  10  -5    1.97    0.85
  -1  10  -5    0.84    0.76
  -2  10  -5   33.04    1.87
  -2  10  -5   29.73    1.88
  -2  10  -5   38.95    2.92
  -3  10  -5    1.52    1.45
  -3  10  -5    3.49    0.87
  -3  10  -5    4.27    0.95
  -4  10  -5    1.14    0.75
  -4  10  -5    1.82    1.04
  -4  10  -5    2.09    1.50
  -4  10  -5    2.21    0.91
  -5  10  -5   -1.14    0.69
  -5  10  -5    1.06    0.86
  -5  10  -5   -0.74    1.42
  -5  10  -5    0.19    1.10
  -5  10  -5    0.54    1.43
  -6  10  -5    6.44    0.93
  -6  10  -5    7.03    1.89
  -7  10  -5    1.59    1.61
  -7  10  -5   -0.25    0.62
  -7  -9   5   16.41    1.63
  -7  -9   5   18.21    1.72
  -6  -9   5    0.46    0.89
  -5  -9   5    1.38    0.84
  -4  -9   5    8.49    1.18
   3   9  -5    8.78    1.14
  -3  -9   5    8.96    1.16
   2   9  -5   11.54    1.20
  -2  -9   5   10.27    1.14
   1   9  -5   35.36    1.91
  -1  -9   5   32.40    1.77
   0   9  -5    0.29    0.66
   0   9  -5    0.65    0.68
   0  -9   5    0.32    0.64
  -1   9  -5   85.62    4.48
  -1   9  -5   76.65    3.02
  -1   9  -5   79.90    3.06
  -2   9  -5   15.62    1.26
  -2   9  -5   18.48    1.38
  -2   9  -5   15.64    2.10
  -3   9  -5   20.72    2.37
  -3   9  -5   25.34    1.72
  -3   9  -5   23.97    1.55
  -3   9  -5   20.35    1.48
  -4   9  -5   55.45    2.35
  -4   9  -5   54.00    3.62
  -4   9  -5   53.14    2.69
  -4   9  -5   59.60    2.40
  -5   9  -5   -0.33    0.63
  -5   9  -5    0.51    0.76
  -5   9  -5   -0.36    1.23
  -5   9  -5   -0.07    1.27
  -5   9  -5   -0.03    0.96
  -6   9  -5   35.56    1.69
  -6   9  -5   37.26    3.05
  -6   9  -5   35.27    3.10
  -6   9  -5   34.67    2.37
  -7   9  -5    0.08    0.58
  -7   9  -5    0.74    0.77
  -7   9  -5    0.52    1.49
  -8  -8   5    3.57    1.04
  -8  -8   5    3.42    1.12
  -7  -8   5    1.85    1.00
  -7  -8   5    2.46    0.97
  -6  -8   5    4.95    1.13
  -6  -8   5    5.87    1.08
  -5  -8   5   64.23    2.85
   4   8  -5    6.91    0.97
  -4  -8   5    5.98    0.94
   3   8  -5  183.16    5.74
  -3  -8   5  179.64    5.77
   2   8  -5    1.73    0.68
  -2  -8   5    2.92    0.71
   1   8  -5   80.38    3.07
  -1  -8   5   87.91    3.08
   0   8  -5   30.13    1.58
   0   8  -5   27.63    1.53
   0  -8   5   29.65    1.48
  -1   8  -5   -0.90    1.04
  -1   8  -5    0.20    0.61
  -1   8  -5    0.03    0.59
  -2   8  -5   38.20    1.77
  -2   8  -5   38.37    1.81
  -2   8  -5   31.85    2.83
  -3   8  -5    5.65    1.49
  -3   8  -5    7.39    1.08
  -3   8  -5    6.80    0.90
  -3   8  -5    6.11    0.85
  -4   8  -5   14.73    1.19
  -4   8  -5   13.58    1.11
  -4   8  -5   16.82    1.54
  -4   8  -5   10.89    1.85
  -5   8  -5   14.76    2.12
  -5   8  -5   17.43    1.21
  -5   8  -5   17.84    2.15
  -5   8  -5   19.03    1.33
  -5   8  -5   16.24    1.64
  -6   8  -5    1.18    1.41
  -6   8  -5    0.12    1.04
  -6   8  -5    0.56    1.38
  -6   8  -5    1.06    0.69
  -6   8  -5    1.00    0.63
   6  -8   5    0.96    0.59
  -7   8  -5    6.17    1.78
  -7   8  -5    4.45    0.84
  -7   8  -5    3.38    0.67
   7  -8   5    4.05    0.73
  -8   8  -5    3.49    0.81
  -8   8  -5    3.17    1.73
   8  -8   5    4.74    0.76
  -8  -7   5    2.52    0.96
  -8  -7   5    1.43    0.90
  -7  -7   5   23.73    1.62
  -7  -7   5   21.01    1.69
  -6  -7   5    6.28    1.08
  -6  -7   5    6.64    1.04
  -5  -7   5   21.37    1.55
  -5  -7   5   19.60    1.50
   4   7  -5   18.64    1.36
  -4  -7   5   21.79    1.40
  -4  -7   5   17.72    1.35
   3   7  -5    4.04    0.76
  -3  -7   5    3.78    0.72
   2   7  -5    1.29    0.65
  -2  -7   5    1.81    0.61
  -2  -7   5    2.06    0.67
   1   7  -5   15.26    1.01
   1   7  -5   14.57    1.12
  -1  -7   5   15.29    1.10
  -1  -7   5   14.28    1.16
   0   7  -5    0.66    0.59
   0   7  -5    0.46    0.58
   0  -7   5    0.25    0.52
  -1   7  -5  113.48    3.64
  -1   7  -5   97.92    4.95
   1  -7   5  109.98    3.51
  -2   7  -5    2.36    0.62
  -2   7  -5    2.85    0.78
  -2   7  -5    1.83    0.64
  -2   7  -5    2.13    1.13
  -3   7  -5   67.36    2.45
  -3   7  -5   67.59    2.42
  -3   7  -5   53.05    3.42
  -3   7  -5   67.14    2.75
  -4   7  -5    0.83    0.83
  -4   7  -5    1.02    0.50
  -4   7  -5    1.62    0.59
  -4   7  -5    1.67    1.22
  -4   7  -5    1.18    0.65
   4  -7   5    0.00    0.43
  -5   7  -5    0.36    0.56
  -5   7  -5    0.63    0.50
  -5   7  -5   -0.28    0.89
  -5   7  -5    0.03    0.67
  -5   7  -5   -0.24    1.06
  -5   7  -5    0.23    1.17
   5  -7   5   -0.11    0.46
  -6   7  -5    2.57    1.39
  -6   7  -5    1.47    0.62
  -6   7  -5    2.28    1.28
  -6   7  -5    2.35    0.61
  -6   7  -5    2.16    1.11
   6  -7   5    1.25    0.55
  -7   7  -5    8.81    1.87
  -7   7  -5    9.36    0.83
  -7   7  -5   10.11    0.92
  -7   7  -5    9.57    1.91
  -7   7  -5   10.07    1.00
   7  -7   5   11.24    0.88
  -8   7  -5   -1.41    1.32
  -8   7  -5   -0.18    0.63
   8  -7   5    0.06    0.59
  -9  -6   5    2.88    0.91
  -9  -6   5    3.86    0.97
  -8  -6   5   17.93    1.49
  -8  -6   5   15.35    1.43
  -7  -6   5    4.34    0.93
  -7  -6   5    4.96    0.94
  -6  -6   5   28.02    1.68
  -6  -6   5   31.06    1.72
  -5  -6   5    3.93    0.82
  -5  -6   5    5.97    0.89
  -4  -6   5    3.98    0.72
  -4  -6   5    3.43    0.72
   3   6  -5   16.84    1.21
  -3  -6   5   16.18    1.16
  -3  -6   5   15.44    1.14
   2   6  -5   29.27    1.51
   2   6  -5   32.43    1.37
  -2  -6   5   28.91    1.61
  -2  -6   5   30.66    1.53
  -2  -6   5   29.81    1.35
  -2  -6   5   29.25    1.43
   1   6  -5   11.88    0.95
   1   6  -5   12.59    0.96
   1   6  -5   12.64    0.90
   1   6  -5   11.39    0.87
  -1  -6   5    9.62    0.95
  -1  -6   5   11.01    0.84
  -1  -6   5   11.28    0.91
   0   6  -5  107.57    3.32
   0   6  -5  106.87    3.52
   0   6  -5  104.14    3.50
   0   6  -5  103.55    3.30
   0  -6   5  111.81    3.48
   0  -6   5  110.54    4.03
   0  -6   5  109.18    4.02
  -1   6  -5    0.74    0.47
  -1   6  -5    0.53    0.53
  -1   6  -5    1.27    0.54
   1  -6   5    0.13    0.51
   1  -6   5    0.04    0.43
   1  -6   5    0.29    0.53
  -2   6  -5   56.67    1.85
  -2   6  -5   57.13    2.15
  -2   6  -5   43.77    2.97
  -2   6  -5   59.06    2.14
  -3   6  -5   51.16    3.21
  -3   6  -5   59.78    2.22
  -3   6  -5   59.96    2.56
  -3   6  -5   60.79    2.25
  -3   6  -5   61.21    1.97
   3  -6   5   62.14    1.90
  -4   6  -5   20.17    1.55
  -4   6  -5   22.26    1.22
  -4   6  -5   18.07    2.06
  -4   6  -5   24.21    1.10
  -4   6  -5   22.64    1.26
  -4   6  -5   21.50    1.26
  -4   6  -5   23.42    2.03
   4  -6   5   21.27    1.00
  -5   6  -5  110.79    3.52
  -5   6  -5   99.93    4.13
  -5   6  -5  102.49    4.68
  -5   6  -5  105.96    3.08
  -5   6  -5   87.94    4.82
  -5   6  -5  100.99    3.42
  -5   6  -5  110.01    3.28
   5  -6   5  107.03    3.00
   5  -6   5  108.62    3.15
  -6   6  -5    1.77    0.56
  -6   6  -5    3.42    1.44
  -6   6  -5    3.18    1.08
  -6   6  -5    2.74    0.66
  -6   6  -5    0.46    1.27
   6  -6   5    2.90    0.68
   6  -6   5    2.29    0.55
  -7   6  -5   41.69    1.70
  -7   6  -5   35.44    2.93
  -7   6  -5   33.95    3.01
  -7   6  -5   38.15    1.62
   7  -6   5   43.38    1.59
  -8   6  -5    1.52    0.67
  -8   6  -5    0.41    1.47
   8  -6   5    1.55    0.60
  -9  -5   5    3.97    0.90
  -8  -5   5   -0.29    0.70
  -8  -5   5    0.44    0.75
  -7  -5   5   19.48    1.41
  -7  -5   5   17.22    1.35
  -6  -5   5   32.07    1.73
  -6  -5   5   32.80    1.69
  -5  -5   5    6.64    0.84
  -5  -5   5    5.59    0.78
  -4  -5   5  172.66    5.33
  -4  -5   5  172.47    5.34
   3   5  -5    1.43    0.59
   3   5  -5    0.41    0.49
   3   5  -5    0.78    0.56
   3   5  -5    0.87    0.46
  -3  -5   5    1.05    0.44
  -3  -5   5    0.74    0.54
  -3  -5   5    0.65    0.46
  -3  -5   5    0.94    0.48
   2   5  -5  225.79    6.22
   2   5  -5  224.56    7.55
   2   5  -5  226.02    6.20
   2   5  -5  217.27    6.55
  -2  -5   5  225.42    6.60
  -2  -5   5  229.36    6.20
  -2  -5   5  211.90    6.52
  -2  -5   5  214.04    7.48
   1   5  -5   74.94    2.57
   1   5  -5   74.51    2.57
   1   5  -5   69.60    2.40
   1   5  -5   76.60    2.94
   1   5  -5   72.79    2.43
  -1  -5   5   73.68    2.90
  -1  -5   5   75.89    2.42
  -1  -5   5   78.55    2.58
   0   5  -5   80.28    3.07
   0   5  -5   85.83    2.59
   0   5  -5   76.89    2.75
   0   5  -5   79.58    2.77
   0  -5   5   82.52    2.69
   0  -5   5   77.38    3.07
   0  -5   5   81.52    3.10
   0  -5   5   80.19    2.55
  -1   5  -5  176.17    5.00
  -1   5  -5  170.13    5.31
  -1   5  -5  176.48    4.77
  -1   5  -5  173.40    5.99
  -1   5  -5  179.42    5.35
   1  -5   5  175.63    4.98
   1  -5   5  178.12    6.09
   1  -5   5  176.43    5.24
   1  -5   5  183.97    6.08
  -2   5  -5    1.54    0.50
  -2   5  -5    1.48    0.54
  -2   5  -5    1.15    0.39
  -2   5  -5    0.93    0.52
  -2   5  -5    1.30    0.95
   2  -5   5    1.96    0.40
   2  -5   5    1.39    0.54
  -3   5  -5   67.44    2.82
  -3   5  -5   75.47    2.36
  -3   5  -5   71.50    2.51
  -3   5  -5   60.98    3.55
  -3   5  -5   74.27    2.20
  -3   5  -5   73.58    2.54
   3  -5   5   72.01    2.12
   3  -5   5   73.73    2.25
  -4   5  -5   32.26    1.81
  -4   5  -5   36.32    1.49
  -4   5  -5   30.30    2.31
  -4   5  -5   34.04    1.28
  -4   5  -5   31.58    1.48
  -4   5  -5   33.99    1.60
  -4   5  -5   35.87    2.24
   4  -5   5   35.42    1.40
   4  -5   5   34.09    1.25
  -5   5  -5    8.97    0.72
  -5   5  -5    5.65    1.34
  -5   5  -5    7.80    0.83
  -5   5  -5    8.33    1.45
  -5   5  -5    7.79    1.17
  -5   5  -5    9.76    0.91
  -5   5  -5    7.71    0.80
   5  -5   5    6.23    0.73
   5  -5   5    8.45    0.64
  -6   5  -5   14.57    1.99
  -6   5  -5   14.97    1.10
  -6   5  -5   16.02    1.01
  -6   5  -5   14.94    1.07
  -6   5  -5   14.60    1.89
   6  -5   5   14.75    0.91
   6  -5   5   15.78    1.04
  -7   5  -5    3.53    1.45
  -7   5  -5    3.13    1.42
  -7   5  -5    3.53    0.64
  -7   5  -5    4.27    0.69
  -7   5  -5    5.00    0.82
   7  -5   5    3.20    0.59
   7  -5   5    3.09    0.74
  -8   5  -5   -0.58    1.39
  -8   5  -5    0.14    1.40
  -8   5  -5   -0.15    0.61
   8  -5   5    0.43    0.57
  -9   5  -5   10.25    2.16
   9  -5   5    9.52    0.92
  -9  -4   5    3.09    0.81
  -8  -4   5   29.21    1.62
  -8  -4   5   26.72    1.55
  -7  -4   5   -0.17    0.54
  -7  -4   5   -0.33    0.65
  -6  -4   5   96.80    3.35
  -6  -4   5   99.57    3.38
  -5  -4   5    0.64    0.49
  -5  -4   5   -0.15    0.47
  -4  -4   5   28.21    1.39
  -4  -4   5   27.73    1.40
   3   4  -5    3.18    0.52
   3   4  -5    4.99    0.59
   3   4  -5    3.71    0.57
   3   4  -5    3.92    0.68
   3   4  -5    5.04    0.74
  -3  -4   5    3.57    0.51
  -3  -4   5    4.77    0.62
  -3  -4   5    3.85    0.63
  -3  -4   5    3.47    0.55
   2   4  -5   38.41    1.44
   2   4  -5   33.42    1.71
   2   4  -5   38.99    1.76
   2   4  -5   38.25    1.55
  -2  -4   5   37.04    1.70
  -2  -4   5   37.44    1.53
  -2  -4   5   37.01    1.43
  -2  -4   5   39.41    1.59
   1   4  -5    1.22    0.46
   1   4  -5    0.76    0.48
   1   4  -5    1.24    0.47
   1   4  -5    1.55    0.53
   1   4  -5    0.67    0.40
  -1  -4   5    0.76    0.42
  -1  -4   5    0.91    0.40
  -1  -4   5    0.30    0.36
  -1  -4   5    1.64    0.51
  -1  -4   5    1.28    0.47
   0   4  -5  304.97    8.82
   0   4  -5  307.62   10.02
   0   4  -5  292.40    8.74
   0   4  -5  304.41    9.97
   0   4  -5  310.19    8.22
   0  -4   5  311.80    9.98
   0  -4   5  303.44    8.20
   0  -4   5  301.98    8.67
   0  -4   5  302.51    9.99
  -1   4  -5   64.81    2.17
  -1   4  -5   65.77    2.33
  -1   4  -5   69.77    2.19
  -1   4  -5   66.39    2.56
  -1   4  -5   68.63    2.05
  -1   4  -5   64.13    2.33
   1  -4   5   67.55    2.63
   1  -4   5   67.97    2.24
   1  -4   5   68.37    2.15
   1  -4   5   71.04    2.65
  -2   4  -5  209.23    5.65
  -2   4  -5  208.99    6.86
  -2   4  -5  208.19    5.78
  -2   4  -5  203.67    6.14
  -2   4  -5  202.86    5.50
  -2   4  -5  216.56    6.21
   2  -4   5  198.80    5.70
   2  -4   5  209.56    5.40
   2  -4   5  209.04    7.02
   2  -4   5  209.65    7.00
  -3   4  -5    1.03    0.53
  -3   4  -5    1.54    0.81
  -3   4  -5    1.22    0.38
  -3   4  -5    0.64    0.77
  -3   4  -5    2.04    0.53
  -3   4  -5    1.45    0.52
   3  -4   5    1.44    0.56
   3  -4   5    1.29    0.46
   3  -4   5    1.68    0.37
  -4   4  -5    5.25    0.53
  -4   4  -5    5.38    0.66
  -4   4  -5    5.04    0.92
  -4   4  -5    5.15    0.69
  -4   4  -5    4.32    0.71
  -4   4  -5    4.88    1.11
  -4   4  -5    4.67    1.05
   4  -4   5    4.43    0.47
   4  -4   5    4.35    0.61
  -5   4  -5   13.85    1.05
  -5   4  -5   10.85    1.53
  -5   4  -5   11.23    0.92
  -5   4  -5   11.31    1.61
  -5   4  -5   12.85    0.94
  -5   4  -5   11.23    0.77
   5  -4   5   15.24    0.91
   5  -4   5   13.40    0.79
  -6   4  -5   10.36    0.92
  -6   4  -5    5.97    1.48
  -6   4  -5    9.25    1.61
  -6   4  -5    9.23    0.87
  -6   4  -5    9.02    0.77
   6  -4   5    8.30    0.67
   6  -4   5    8.93    0.80
  -7   4  -5    5.55    0.76
  -7   4  -5    4.71    1.50
  -7   4  -5    3.38    1.51
  -7   4  -5    4.55    0.80
  -7   4  -5    5.93    0.74
   7  -4   5    5.44    0.75
   7  -4   5    4.39    0.64
  -8   4  -5   20.50    1.09
  -8   4  -5   21.67    1.38
  -8   4  -5   20.74    2.39
  -8   4  -5   19.42    2.46
   8  -4   5   21.17    1.23
  -9   4  -5    3.74    1.76
   9  -4   5    0.90    0.68
 -10  -3   5    3.79    0.76
  -9  -3   5    9.40    0.97
  -8  -3   5    2.99    0.75
  -8  -3   5    2.15    0.68
   7   3  -5   40.41    1.59
  -7  -3   5   37.28    1.74
  -7  -3   5   42.52    1.86
   6   3  -5    2.32    0.48
  -6  -3   5    1.83    0.57
  -6  -3   5    1.88    0.60
   5   3  -5    7.21    0.60
  -5  -3   5    7.74    0.67
  -5  -3   5    7.95    0.76
  -5  -3   5    6.80    0.70
   4   3  -5   61.63    1.87
   4   3  -5   58.09    2.46
  -4  -3   5   60.93    1.93
  -4  -3   5   58.93    2.15
  -4  -3   5   60.10    2.16
   3   3  -5   45.97    1.64
   3   3  -5   47.87    1.54
   3   3  -5   43.91    2.01
   3   3  -5   46.71    1.71
   3   3  -5   47.92    1.99
  -3  -3   5   45.61    1.73
  -3  -3   5   44.59    1.88
  -3  -3   5   46.84    1.63
  -3  -3   5   45.95    1.57
  -3  -3   5   48.63    1.57
  -3  -3   5   43.32    1.71
   2   3  -5  154.49    5.25
   2   3  -5  153.47    4.58
   2   3  -5  156.32    4.33
   2   3  -5  144.23    5.24
  -2  -3   5  148.96    4.57
  -2  -3   5  149.54    5.20
  -2  -3   5  158.02    4.16
  -2  -3   5  163.15    5.27
  -2  -3   5  153.13    4.61
  -2  -3   5  145.24    4.30
   1   3  -5  141.82    4.88
   1   3  -5  137.73    4.00
   1   3  -5  147.70    4.28
   1   3  -5  135.54    4.85
  -1  -3   5  144.77    4.26
  -1  -3   5  140.80    4.84
  -1  -3   5  139.50    4.21
  -1  -3   5  139.19    4.85
  -1  -3   5  139.09    3.99
   0   3  -5    5.88    0.56
   0   3  -5    8.00    0.69
   0   3  -5    7.61    0.66
   0   3  -5    6.58    0.68
   0  -3   5    5.19    0.64
   0  -3   5    7.29    0.70
   0  -3   5    5.78    0.54
   0  -3   5    6.16    0.55
  -1   3  -5  122.87    3.48
  -1   3  -5  120.11    3.78
  -1   3  -5  129.37    3.83
  -1   3  -5  118.46    4.22
  -1   3  -5  123.70    3.55
   1  -3   5  127.91    3.29
   1  -3   5  122.98    4.27
   1  -3   5  118.89    3.66
   1  -3   5  114.06    4.27
   1  -3   5  120.64    3.51
  -2   3  -5   65.37    2.10
  -2   3  -5   61.57    2.25
  -2   3  -5   65.97    1.95
  -2   3  -5   54.44    2.93
  -2   3  -5   65.34    2.40
  -2   3  -5   62.66    2.11
  -2   3  -5   65.07    2.38
  -2   3  -5   65.16    2.33
   2  -3   5   65.50    2.04
   2  -3   5   63.28    1.87
   2  -3   5   62.74    2.12
   2  -3   5   62.67    2.54
   2  -3   5   65.14    2.52
   2  -3   5   64.58    2.04
  -3   3  -5   42.80    1.59
  -3   3  -5   41.40    1.71
  -3   3  -5   41.42    1.76
  -3   3  -5   45.06    1.92
  -3   3  -5   40.73    2.44
  -3   3  -5   43.70    2.20
  -3   3  -5   43.17    1.46
   3  -3   5   42.78    1.54
   3  -3   5   45.01    1.96
   3  -3   5   42.48    1.38
  -4   3  -5  168.23    5.32
  -4   3  -5  171.20    6.86
  -4   3  -5  178.92    4.85
  -4   3  -5  183.27    5.35
  -4   3  -5  176.63    5.97
  -4   3  -5  171.92    4.73
  -4   3  -5  166.73    6.30
   4  -3   5  179.10    4.67
   4  -3   5  176.26    4.59
  -5   3  -5    0.58    0.48
  -5   3  -5    1.65    0.93
  -5   3  -5    0.19    0.42
  -5   3  -5    1.09    0.96
  -5   3  -5    0.40    0.80
  -5   3  -5    1.86    0.65
  -5   3  -5    2.03    0.59
   5  -3   5    0.78    0.39
  -6   3  -5  126.79    5.74
  -6   3  -5  125.06    5.38
  -6   3  -5  128.01    4.16
  -6   3  -5  132.63    4.22
  -6   3  -5  134.16    5.09
  -6   3  -5  133.38    3.82
  -6   3  -5  131.31    3.76
   6  -3   5  124.56    3.59
  -7   3  -5   -0.75    1.17
  -7   3  -5    0.23    0.63
  -7   3  -5   -0.43    0.57
  -7   3  -5   -0.49    0.59
  -7   3  -5    0.07    1.26
  -7   3  -5    1.18    1.20
   7  -3   5    0.32    0.50
  -8   3  -5   17.79    1.26
  -8   3  -5   17.49    1.12
  -8   3  -5   17.94    2.35
  -8   3  -5   16.35    2.28
   8  -3   5   18.18    1.11
  -9   3  -5    7.01    1.89
   9  -3   5    8.14    0.92
 -10  -2   5    4.72    0.64
   9   2  -5    2.69    0.62
  -9  -2   5    1.86    0.62
   8   2  -5    1.63    0.54
  -8  -2   5    2.69    0.62
   7   2  -5    1.37    0.57
   7   2  -5    0.74    0.44
  -7  -2   5    0.78    0.49
  -7  -2   5    0.60    0.51
  -7  -2   5   -0.04    0.56
   6   2  -5   -0.41    0.42
   6   2  -5    0.20    0.34
  -6  -2   5    0.38    0.43
  -6  -2   5    0.37    0.48
  -6  -2   5   -0.42    0.41
   5   2  -5  164.60    4.31
   5   2  -5  161.16    4.38
  -5  -2   5  159.86    4.92
  -5  -2   5  162.36    4.43
  -5  -2   5  164.18    4.89
   4   2  -5    5.61    0.48
   4   2  -5    5.49    0.55
   4   2  -5    4.74    0.69
  -4  -2   5    5.74    0.65
  -4  -2   5    6.06    0.55
  -4  -2   5    6.16    0.55
  -4  -2   5    5.11    0.58
  -4  -2   5    5.55    0.61
   3   2  -5  600.32   15.16
   3   2  -5  608.10   15.89
   3   2  -5  599.40   16.83
   3   2  -5  622.32   19.34
   3   2  -5  613.25   15.12
   3   2  -5  586.85   19.36
  -3  -2   5  617.74   15.39
  -3  -2   5  596.86   19.22
  -3  -2   5  600.24   19.29
  -3  -2   5  603.08   15.39
  -3  -2   5  593.40   16.89
  -3  -2   5  624.34   15.87
  -3  -2   5  619.22   17.03
   2   2  -5  101.88    3.25
   2   2  -5   99.30    3.76
   2   2  -5  109.78    3.79
   2   2  -5  106.36    3.12
  -2  -2   5  108.19    3.09
  -2  -2   5  110.09    3.33
  -2  -2   5  105.01    3.28
  -2  -2   5  110.16    3.78
  -2  -2   5  107.30    2.96
  -2  -2   5  106.05    3.72
  -2  -2   5  103.93    2.97
   1   2  -5  273.79    8.92
   1   2  -5  257.69    8.90
   1   2  -5  267.67    7.32
   1   2  -5  275.71    7.80
  -1  -2   5  271.23    8.89
  -1  -2   5  281.35    8.91
  -1  -2   5  266.81    7.31
  -1  -2   5  279.16    7.78
   0   2  -5   97.33    3.15
   0   2  -5  102.19    3.15
   0   2  -5   93.61    3.50
   0   2  -5   94.12    2.90
   0  -2   5  101.77    3.07
   0  -2   5   98.83    3.55
   0  -2   5   99.20    3.52
   0  -2   5   99.70    2.90
  -1   2  -5   -0.70    0.28
  -1   2  -5    0.16    0.38
  -1   2  -5   -0.40    0.62
  -1   2  -5   -0.11    0.40
  -1   2  -5   -0.15    0.34
  -1   2  -5    0.21    0.42
   1  -2   5   -0.20    0.31
   1  -2   5    0.19    0.31
   1  -2   5    1.56    0.47
  -2   2  -5  137.73    5.07
  -2   2  -5  148.16    4.48
  -2   2  -5  143.85    4.18
  -2   2  -5  147.77    3.95
  -2   2  -5  147.18    4.05
  -2   2  -5  148.33    4.93
  -2   2  -5  146.80    4.79
  -2   2  -5  134.93    5.57
   2  -2   5  150.80    5.05
   2  -2   5  146.53    4.32
   2  -2   5  146.80    3.85
   2  -2   5  143.98    4.12
  -3   2  -5   12.57    1.26
  -3   2  -5   13.53    1.23
  -3   2  -5   13.93    1.08
  -3   2  -5   14.31    0.85
  -3   2  -5   12.41    0.81
  -3   2  -5   11.30    0.94
  -3   2  -5   12.85    0.82
  -3   2  -5   12.63    0.86
   3  -2   5   13.98    0.75
   3  -2   5   14.90    1.04
  -4   2  -5   71.76    2.20
  -4   2  -5   65.87    3.11
  -4   2  -5   67.88    3.36
  -4   2  -5   71.86    2.95
  -4   2  -5   72.85    2.25
  -4   2  -5   74.98    2.61
   4  -2   5   73.27    2.11
  -5   2  -5    3.64    0.59
  -5   2  -5    4.56    0.78
  -5   2  -5    2.35    0.92
  -5   2  -5    3.48    0.55
  -5   2  -5    3.88    1.08
  -5   2  -5    2.67    0.95
   5  -2   5    3.49    0.48
  -6   2  -5    1.42    1.14
  -6   2  -5    1.33    0.58
  -6   2  -5    2.43    0.78
  -6   2  -5    1.73    0.59
  -6   2  -5    2.46    0.99
  -6   2  -5    0.52    1.10
   6  -2   5    1.64    0.50
  -7   2  -5    1.79    1.34
  -7   2  -5    1.68    0.69
  -7   2  -5    0.82    1.18
  -7   2  -5    1.52    1.31
   7  -2   5    0.83    0.54
  -8   2  -5    7.86    0.91
  -8   2  -5    6.15    1.73
  -8   2  -5    7.68    0.99
  -8   2  -5   11.80    1.82
   8  -2   5   10.07    0.92
  -9   2  -5    0.72    0.55
  -9   2  -5   -0.10    1.49
  10   1  -5   11.86    0.93
   9   1  -5   26.57    1.26
  -9  -1   5   27.09    1.25
   8   1  -5    4.07    0.65
   8   1  -5    3.94    0.56
  -8  -1   5    2.78    0.57
  -8  -1   5    4.43    0.66
   7   1  -5   85.04    2.58
   7   1  -5   84.90    2.47
  -7  -1   5   87.83    2.62
  -7  -1   5   88.29    2.85
  -7  -1   5   82.28    2.83
   6   1  -5    0.33    0.41
   6   1  -5    0.48    0.32
  -6  -1   5    0.64    0.47
  -6  -1   5    0.61    0.62
  -6  -1   5    0.64    0.40
  -6  -1   5   -0.31    0.39
   5   1  -5   68.28    2.01
   5   1  -5   69.60    1.93
   5   1  -5   61.42    2.60
  -5  -1   5   65.71    2.05
  -5  -1   5   69.06    2.30
  -5  -1   5   68.86    2.57
  -5  -1   5   63.17    2.23
   4   1  -5    8.76    0.53
   4   1  -5    7.30    0.57
   4   1  -5    7.93    0.82
  -4  -1   5    9.42    0.83
  -4  -1   5    7.74    0.54
  -4  -1   5    8.85    0.70
  -4  -1   5    7.08    0.64
  -4  -1   5    8.96    0.53
  -4  -1   5    7.92    0.59
  -4  -1   5   10.23    0.60
   3   1  -5   42.84    1.35
   3   1  -5   43.39    1.41
   3   1  -5   40.10    1.78
   3   1  -5   43.02    1.47
   3   1  -5   40.27    1.82
  -3  -1   5   42.88    1.36
  -3  -1   5   42.65    1.60
  -3  -1   5   39.89    1.58
  -3  -1   5   42.60    1.40
  -3  -1   5   41.86    1.69
  -3  -1   5   42.68    1.64
  -3  -1   5   40.40    1.42
   2   1  -5    0.92    0.35
   2   1  -5    1.26    0.41
   2   1  -5    1.42    0.48
   2   1  -5    1.56    0.47
   2   1  -5    0.59    0.30
  -2  -1   5    1.43    0.34
  -2  -1   5    1.38    0.34
  -2  -1   5    1.83    0.43
  -2  -1   5    0.97    0.43
  -2  -1   5    1.58    0.36
  -2  -1   5    1.33    0.41
  -2  -1   5    0.94    0.39
   1   1  -5   28.17    1.15
   1   1  -5   27.82    1.43
   1   1  -5   30.73    1.29
  -1  -1   5   30.71    1.24
  -1  -1   5   32.75    1.12
  -1  -1   5   27.99    1.21
  -1  -1   5   29.75    1.15
  -1  -1   5   30.08    1.42
   0   1  -5   29.41    1.30
   0   1  -5   27.31    1.33
   0   1  -5   27.03    1.25
   0   1  -5   26.15    1.10
   0  -1   5   24.65    1.07
   0  -1   5   27.06    1.21
   0  -1   5   27.04    1.35
   0  -1   5   24.84    1.30
  -1   1  -5  251.49    9.01
  -1   1  -5  251.99    6.63
  -1   1  -5  264.77    8.27
  -1   1  -5  249.24    6.71
  -1   1  -5  242.86    8.34
  -1   1  -5  254.63    6.92
   1  -1   5  255.57    6.89
   1  -1   5  254.62    7.27
   1  -1   5  258.96    8.41
  -2   1  -5    0.15    0.36
  -2   1  -5    1.10    0.58
  -2   1  -5    0.53    0.48
  -2   1  -5    0.81    0.48
  -2   1  -5    0.75    0.40
  -2   1  -5    0.92    0.60
  -2   1  -5    0.51    0.40
  -2   1  -5    0.53    0.59
   2  -1   5    0.42    0.31
   2  -1   5    0.63    0.38
   2  -1   5    0.75    0.39
   2  -1   5    0.55    0.51
  -3   1  -5   71.53    2.21
  -3   1  -5   74.41    2.25
  -3   1  -5   72.85    3.17
  -3   1  -5   68.93    2.98
  -3   1  -5   75.10    2.35
  -3   1  -5   69.06    2.54
  -3   1  -5   72.64    2.86
   3  -1   5   75.80    2.91
   3  -1   5   73.92    2.32
   3  -1   5   71.77    2.36
   3  -1   5   70.67    2.13
  -4   1  -5   16.10    1.13
  -4   1  -5   13.49    1.36
  -4   1  -5   15.46    1.32
  -4   1  -5   15.78    1.40
  -4   1  -5   12.68    0.84
  -4   1  -5   15.28    0.89
   4  -1   5   13.30    0.83
  -5   1  -5   -0.21    0.78
  -5   1  -5    0.19    0.46
  -5   1  -5    0.93    0.67
  -5   1  -5   -0.78    0.70
  -5   1  -5    0.77    0.50
  -5   1  -5    0.15    0.73
   5  -1   5    0.58    0.44
  -6   1  -5   10.09    1.57
  -6   1  -5   14.56    1.03
  -6   1  -5   11.99    1.65
  -6   1  -5   13.71    1.22
  -6   1  -5   10.79    1.51
   6  -1   5   11.92    0.86
  -7   1  -5    9.97    1.76
  -7   1  -5   11.32    1.65
  -7   1  -5   12.35    1.07
   7  -1   5    9.89    0.89
  -8   1  -5    2.11    1.50
  -8   1  -5    4.12    1.52
   8  -1   5    1.63    0.71
  -9   1  -5    9.20    0.97
  -9   1  -5   12.51    2.10
  10   0  -5    2.58    0.58
   9   0  -5    6.73    0.74
   9   0  -5    7.32    0.67
  -9   0   5    8.80    0.78
   8   0  -5   18.27    1.05
   8   0  -5   17.63    0.90
  -8   0   5   18.25    1.08
  -8   0   5   17.77    0.94
   7   0  -5   11.24    0.72
   7   0  -5   10.91    0.68
  -7   0   5   11.68    0.79
  -7   0   5   11.49    0.81
  -7   0   5   14.16    1.29
   6   0  -5   31.23    1.15
   6   0  -5   30.65    1.04
  -6   0   5   29.18    1.64
  -6   0   5   31.62    1.22
  -6   0   5   31.05    1.29
  -6   0   5   30.28    1.35
   5   0  -5   18.80    0.77
   5   0  -5   22.03    1.24
   5   0  -5   20.15    0.87
  -5   0   5   19.62    0.94
  -5   0   5   20.55    1.27
  -5   0   5   18.60    1.00
  -5   0   5   20.37    1.09
   4   0  -5    1.48    0.58
   4   0  -5    1.74    0.35
   4   0  -5    1.03    0.30
  -4   0   5    2.17    0.49
  -4   0   5    2.56    0.64
  -4   0   5    2.29    0.39
  -4   0   5    2.28    0.39
  -4   0   5    1.98    0.44
  -4   0   5    2.00    0.36
   3   0  -5  196.15    6.76
   3   0  -5  202.04    5.19
   3   0  -5  197.21    5.53
   3   0  -5  203.75    5.18
  -3   0   5  197.90    5.29
  -3   0   5  200.14    5.87
  -3   0   5  196.11    5.90
  -3   0   5  199.17    6.55
  -3   0   5  205.36    6.54
  -3   0   5  205.48    6.54
  -3   0   5  204.04    5.28
  -3   0   5  208.75    5.51
   2   0  -5   18.31    1.11
   2   0  -5   18.97    0.90
   2   0  -5   19.16    0.82
  -2   0   5   18.40    1.03
  -2   0   5   19.41    0.84
  -2   0   5   18.77    1.03
  -2   0   5   19.57    0.97
  -2   0   5   20.07    1.03
  -2   0   5   20.46    0.92
  -2   0   5   20.46    0.86
   1   0  -5   30.73    1.47
   1   0  -5   30.90    1.40
   1   0  -5   30.57    1.22
  -1   0   5   30.40    1.18
  -1   0   5   32.49    1.45
  -1   0   5   32.16    1.48
  -1   0   5   30.24    1.19
  -1   0   5   31.84    1.32
  -1   0   5   30.33    1.30
   0   0  -5  102.17    3.35
   0   0  -5   98.28    3.20
   0   0  -5  102.57    2.97
   0   0  -5   94.79    3.56
   0   0   5   97.21    3.55
   0   0   5   97.45    2.93
   0   0   5   99.38    3.08
  -1   0  -5    1.77    0.50
  -1   0  -5    1.55    0.50
  -1   0  -5    2.34    0.65
  -1   0  -5    2.00    0.47
  -1   0  -5    0.99    0.36
  -1   0  -5    1.64    0.52
  -1   0  -5    1.08    0.50
   1   0   5    2.09    0.47
   1   0   5    2.05    0.55
   1   0   5    2.05    0.42
  -2   0  -5   84.83    3.26
  -2   0  -5   89.69    2.58
  -2   0  -5   79.70    2.89
  -2   0  -5   82.06    2.66
  -2   0  -5   84.26    3.19
  -2   0  -5   84.52    2.92
  -2   0  -5   89.93    3.40
  -2   0  -5   82.63    3.22
  -2   0  -5   82.38    2.54
   2   0   5   85.01    2.69
   2   0   5   89.33    2.68
   2   0   5   88.59    2.48
   2   0   5   85.15    2.75
   2   0   5   96.62    3.36
  -3   0  -5   98.09    3.90
  -3   0  -5   97.39    3.73
  -3   0  -5   96.53    2.89
  -3   0  -5   96.05    3.28
  -3   0  -5   96.38    3.52
  -3   0  -5  102.88    3.30
  -3   0  -5   94.17    3.75
  -3   0  -5   97.93    3.00
  -3   0  -5   99.91    2.87
   3   0   5  104.12    3.75
   3   0   5   96.53    2.78
   3   0   5   97.68    3.03
  -4   0  -5    1.51    0.45
  -4   0  -5    1.54    0.78
  -4   0  -5    1.48    0.59
  -4   0  -5    1.93    0.52
  -4   0  -5    2.34    0.66
  -4   0  -5    2.35    0.86
  -4   0  -5    1.58    0.74
   4   0   5    2.26    0.46
  -5   0  -5  210.39    6.09
  -5   0  -5  194.84    6.06
  -5   0  -5  185.77    7.05
  -5   0  -5  195.84    7.50
  -5   0  -5  197.43    5.44
  -5   0  -5  190.59    6.90
   5   0   5  193.98    5.26
  -6   0  -5    3.19    0.78
  -6   0  -5    2.95    0.85
  -6   0  -5    2.19    1.07
  -6   0  -5    2.39    1.13
  -6   0  -5    2.89    0.75
   6   0   5    3.20    0.63
  -7   0  -5   53.35    3.23
  -7   0  -5   50.34    2.41
  -7   0  -5   45.90    2.94
  -8   0  -5    7.55    1.80
  -9   0  -5    1.29    1.60
  10  -1  -5    7.18    0.68
   9  -1  -5    1.96    0.57
   9  -1  -5    0.90    0.43
  -9   1   5    1.39    0.48
  -9   1   5    1.39    0.55
   8  -1  -5   -0.13    0.34
   8  -1  -5    0.45    0.44
  -8   1   5   -1.04    0.85
  -8   1   5    0.21    0.34
  -8   1   5   -0.04    0.39
  -8   1   5   -0.03    0.49
   7  -1  -5    0.81    0.31
   7  -1  -5    0.56    0.36
  -7   1   5    1.49    0.47
  -7   1   5    0.63    0.36
  -7   1   5    0.54    0.39
  -7   1   5    0.87    0.81
   6  -1  -5   59.10    1.70
   6  -1  -5   59.97    1.72
  -6   1   5   58.80    1.79
  -6   1   5   58.46    2.60
  -6   1   5   57.73    2.04
  -6   1   5   64.87    2.10
  -6   1   5   63.49    1.87
   5  -1  -5    2.52    0.32
   5  -1  -5    2.21    0.29
   5  -1  -5    1.45    0.58
  -5   1   5    1.59    0.45
  -5   1   5    1.91    0.35
  -5   1   5    3.25    0.74
  -5   1   5    2.60    0.38
  -5   1   5    2.82    0.54
   4  -1  -5  204.41    5.22
   4  -1  -5  206.71    5.23
   4  -1  -5  205.29    6.90
  -4   1   5  211.61    5.56
  -4   1   5  205.53    5.36
  -4   1   5  205.34    5.98
  -4   1   5  196.06    6.02
  -4   1   5  204.57    5.36
  -4   1   5  205.71    6.75
   3  -1  -5    5.27    0.55
   3  -1  -5    3.56    0.41
   3  -1  -5    3.80    0.64
   3  -1  -5    4.16    0.39
  -3   1   5    4.23    0.44
  -3   1   5    4.58    0.55
  -3   1   5    4.39    0.55
  -3   1   5    4.01    0.42
  -3   1   5    5.27    0.78
  -3   1   5    3.76    0.44
  -3   1   5    4.59    0.52
  -3   1   5    4.14    0.44
   2  -1  -5  269.66    9.25
   2  -1  -5  280.42    7.23
   2  -1  -5  290.11    7.62
   2  -1  -5  287.44    7.16
  -2   1   5  275.55    9.19
  -2   1   5  276.65    9.13
  -2   1   5  278.62    8.05
  -2   1   5  290.49    7.30
  -2   1   5  286.01    8.12
  -2   1   5  285.88    7.36
  -2   1   5  283.16    7.61
   1  -1  -5  169.56    5.03
   1  -1  -5  156.30    5.68
   1  -1  -5  173.65    4.70
  -1   1   5  165.09    4.93
  -1   1   5  169.52    4.99
  -1   1   5  163.53    5.61
  -1   1   5  164.69    4.66
  -1   1   5  173.43    4.53
   0  -1  -5  120.68    4.54
   0  -1  -5  136.47    4.57
   0  -1  -5  127.65    4.27
   0  -1  -5  126.97    3.75
   0  -1  -5  132.50    4.03
   0   1   5  127.97    3.76
   0   1   5  131.96    3.74
   0   1   5  129.19    4.52
   0   1   5  133.30    3.96
  -1  -1  -5  666.96   20.87
  -1  -1  -5  667.06   18.78
  -1  -1  -5  657.17   21.32
  -1  -1  -5  678.46   22.57
  -1  -1  -5  648.55   17.50
  -1  -1  -5  643.22   18.65
   1   1   5  690.20   18.60
   1   1   5  680.50   21.32
   1   1   5  679.39   17.51
   1   1   5  666.61   17.48
  -2  -1  -5    0.94    0.55
  -2  -1  -5    0.23    0.41
  -2  -1  -5    0.15    0.43
  -2  -1  -5    0.41    0.44
  -2  -1  -5    0.63    0.62
  -2  -1  -5   -0.59    0.39
  -2  -1  -5    0.03    0.48
  -2  -1  -5   -0.04    0.46
  -2  -1  -5    1.70    0.83
   2   1   5    0.77    0.43
   2   1   5    0.63    0.41
   2   1   5   -0.46    0.39
   2   1   5    0.41    0.53
  -3  -1  -5  185.54    5.57
  -3  -1  -5  185.35    6.60
  -3  -1  -5  175.70    6.31
  -3  -1  -5  178.92    6.20
  -3  -1  -5  180.54    4.99
  -3  -1  -5  176.20    5.52
  -3  -1  -5  177.85    6.32
   3   1   5  172.38    5.37
   3   1   5  198.67    6.38
   3   1   5  183.40    4.85
  -4  -1  -5   13.92    0.95
  -4  -1  -5   11.82    1.01
  -4  -1  -5   11.89    1.00
  -4  -1  -5   11.52    1.38
  -4  -1  -5   13.37    1.22
  -4  -1  -5   10.85    1.26
   4   1   5   13.87    0.91
  -5  -1  -5    8.48    1.01
  -5  -1  -5    7.52    0.92
  -5  -1  -5    8.17    1.25
  -5  -1  -5    9.02    1.31
  -6  -1  -5    9.31    1.48
  -6  -1  -5    7.66    1.48
  -6  -1  -5    9.54    1.13
  -6  -1  -5    7.79    1.00
  -7  -1  -5    1.97    0.94
  -7  -1  -5    1.41    0.83
  -7  -1  -5    1.04    1.33
  -8  -1  -5    0.68    1.47
  -9  -1  -5   15.14    2.35
  10  -2  -5    5.51    0.59
   9  -2  -5    0.41    0.38
  -9   2   5    0.16    0.44
  -9   2   5    1.05    0.97
  -9   2   5    0.09    0.50
   8  -2  -5   38.35    1.30
   8  -2  -5   37.64    1.24
  -8   2   5   38.49    1.34
  -8   2   5   38.75    2.24
  -8   2   5   39.55    1.45
   7  -2  -5    0.06    0.30
   7  -2  -5    0.27    0.28
  -7   2   5    0.24    0.36
  -7   2   5    0.41    0.41
  -7   2   5   -0.08    0.35
  -7   2   5    0.93    0.83
   6  -2  -5  103.70    2.73
   6  -2  -5  102.37    2.75
  -6   2   5  103.82    2.88
  -6   2   5  104.70    4.01
  -6   2   5  104.26    3.26
  -6   2   5  106.27    2.89
   5  -2  -5    6.17    0.42
   5  -2  -5    7.68    0.83
   5  -2  -5    6.50    0.41
  -5   2   5    5.87    0.65
  -5   2   5    6.81    0.68
  -5   2   5    6.31    0.95
  -5   2   5    6.35    0.48
  -5   2   5    6.31    0.49
   4  -2  -5   86.58    2.39
   4  -2  -5   85.72    2.36
   4  -2  -5   91.25    3.27
  -4   2   5   84.48    3.28
  -4   2   5   86.44    2.48
  -4   2   5   88.12    2.56
  -4   2   5   82.97    2.82
  -4   2   5   87.24    2.44
  -4   2   5   91.39    2.83
   3  -2  -5   39.48    1.46
   3  -2  -5   43.80    1.86
   3  -2  -5   41.24    1.32
   3  -2  -5   41.15    1.40
  -3   2   5   43.25    1.52
  -3   2   5   41.40    1.45
  -3   2   5   40.99    1.58
  -3   2   5   40.71    1.59
  -3   2   5   41.89    1.55
  -3   2   5   40.74    1.36
  -3   2   5   43.75    1.47
  -3   2   5   40.28    1.64
   2  -2  -5   28.69    1.18
   2  -2  -5   27.44    1.03
   2  -2  -5   27.03    1.38
   2  -2  -5   28.54    1.27
  -2   2   5   26.38    1.11
  -2   2   5   29.08    1.20
  -2   2   5   29.16    1.26
  -2   2   5   28.32    1.28
  -2   2   5   28.73    1.28
  -2   2   5   28.80    1.16
  -2   2   5   28.49    1.39
  -2   2   5   28.50    1.05
   1  -2  -5   56.85    2.12
   1  -2  -5   59.16    1.91
   1  -2  -5   53.21    2.27
  -1   2   5   58.45    1.85
  -1   2   5   57.54    1.99
  -1   2   5   56.35    2.22
  -1   2   5   55.29    1.87
  -1   2   5   56.90    2.01
  -1   2   5   56.49    1.89
   0  -2  -5  315.68    8.48
   0  -2  -5  300.48   10.31
   0  -2  -5  323.62    9.07
   0   2   5  318.27    9.04
   0   2   5  325.21    8.49
   0   2   5  305.97    8.95
   0   2   5  312.39   10.27
   0   2   5  309.31    8.45
  -1  -2  -5   24.16    1.12
  -1  -2  -5   23.91    1.26
  -1  -2  -5   22.70    1.35
   1   2   5   24.31    1.14
   1   2   5   23.23    1.07
   1   2   5   24.95    1.38
   1   2   5   23.31    1.24
  -2  -2  -5  180.15    6.16
  -2  -2  -5  180.46    6.26
  -2  -2  -5  180.52    5.14
  -2  -2  -5  170.90    6.35
  -2  -2  -5  182.64    5.52
  -2  -2  -5  174.38    5.46
   2   2   5  185.87    6.28
   2   2   5  178.52    5.40
   2   2   5  181.02    5.11
   2   2   5  186.11    5.16
  -3  -2  -5    1.47    0.56
  -3  -2  -5    0.83    0.52
  -3  -2  -5    0.12    0.78
  -3  -2  -5    1.31    0.78
   3   2   5    1.13    0.53
   3   2   5    0.96    0.60
  -4  -2  -5    5.95    1.06
  -4  -2  -5    7.80    0.85
  -4  -2  -5    6.73    0.85
  -4  -2  -5    6.88    1.28
  -5  -2  -5   32.98    1.78
  -5  -2  -5   31.74    2.34
  -5  -2  -5   37.09    1.78
  -6  -2  -5   13.78    1.30
  -6  -2  -5   11.86    1.18
  -6  -2  -5   10.46    1.66
  -7  -2  -5   13.41    1.35
  -7  -2  -5   14.35    2.06
  -7  -2  -5   16.47    1.48
  -8  -2  -5   10.33    1.40
  -8  -2  -5   10.68    1.32
  -8  -2  -5   12.00    2.15
  -9  -2  -5    0.60    1.59
  10  -3  -5    7.29    0.71
  10  -3  -5    6.42    0.61
 -10   3   5    8.34    1.55
   9  -3  -5    4.50    0.54
   9  -3  -5    4.77    0.50
  -9   3   5    4.73    1.24
  -9   3   5    5.29    0.61
  -9   3   5    4.13    0.64
   8  -3  -5    6.83    0.50
   8  -3  -5    6.52    0.50
  -8   3   5    6.24    0.60
  -8   3   5    7.83    0.65
  -8   3   5    8.59    1.36
   7  -3  -5   20.40    0.82
   7  -3  -5   20.14    0.82
  -7   3   5   20.34    0.93
  -7   3   5   21.97    0.96
  -7   3   5   22.07    1.74
  -7   3   5   22.06    0.96
   6  -3  -5    2.27    0.32
   6  -3  -5    2.40    0.34
  -6   3   5    2.28    0.43
  -6   3   5    2.95    0.55
  -6   3   5    1.26    0.86
  -6   3   5    1.48    0.38
   5  -3  -5   -0.03    0.30
   5  -3  -5    0.48    0.28
  -5   3   5   -0.24    0.66
  -5   3   5   -0.40    0.43
  -5   3   5    0.17    0.39
  -5   3   5    0.36    0.31
  -5   3   5    0.54    0.49
   4  -3  -5   66.72    1.99
   4  -3  -5   69.04    2.64
   4  -3  -5   67.04    1.90
  -4   3   5   67.25    1.97
  -4   3   5   65.77    2.07
  -4   3   5   63.89    2.72
  -4   3   5   66.87    2.31
  -4   3   5   65.69    2.28
   3  -3  -5   25.43    0.98
   3  -3  -5   27.65    1.20
   3  -3  -5   24.42    1.35
  -3   3   5   25.20    1.01
  -3   3   5   23.81    1.45
  -3   3   5   27.00    1.22
  -3   3   5   24.98    1.13
  -3   3   5   25.01    1.15
  -3   3   5   27.08    1.08
  -3   3   5   26.84    1.11
  -3   3   5   27.27    1.15
  -3   3   5   26.51    1.21
   2  -3  -5  114.48    3.05
   2  -3  -5  105.90    3.56
   2  -3  -5  111.43    3.29
   2  -3  -5  109.58    4.02
  -2   3   5  110.09    3.46
  -2   3   5  112.31    3.49
  -2   3   5  112.84    3.32
  -2   3   5  111.40    3.11
  -2   3   5  111.68    3.28
  -2   3   5  115.13    3.23
   1  -3  -5    9.17    0.89
   1  -3  -5   10.29    0.86
   1  -3  -5   11.11    0.79
  -1   3   5   10.56    0.80
  -1   3   5    8.22    0.68
  -1   3   5    9.57    0.74
  -1   3   5    9.47    0.71
  -1   3   5    9.98    0.73
   0  -3  -5   52.56    2.32
   0  -3  -5   55.36    1.93
   0  -3  -5   60.79    2.19
   0   3   5   54.07    1.88
   0   3   5   56.28    2.01
   0   3   5   54.30    2.06
   0   3   5   55.74    1.93
  -1  -3  -5   13.51    0.91
  -1  -3  -5   16.40    1.11
  -1  -3  -5   13.37    1.08
  -1  -3  -5   13.61    1.01
   1   3   5   13.04    0.90
   1   3   5   13.64    1.10
   1   3   5   12.51    0.92
   1   3   5   13.33    0.84
  -2  -3  -5   36.12    1.80
  -2  -3  -5   36.03    1.66
  -2  -3  -5   33.19    1.44
  -2  -3  -5   35.38    1.61
   2   3   5   33.94    1.57
   2   3   5   33.98    1.46
  -3  -3  -5    3.75    0.73
  -3  -3  -5    2.60    0.65
  -3  -3  -5    2.15    1.05
   3   3   5    3.74    0.66
  -4  -3  -5  144.14    4.73
  -4  -3  -5  135.81    5.62
  -4  -3  -5  158.05    4.80
  -5  -3  -5    0.40    0.73
  -5  -3  -5    0.44    0.74
  -5  -3  -5    1.21    1.22
  -6  -3  -5   60.87    3.50
  -6  -3  -5   66.62    2.77
  -6  -3  -5   67.10    2.74
  -7  -3  -5    2.80    1.03
  -7  -3  -5    2.77    1.55
  -7  -3  -5    2.17    0.96
  -8  -3  -5   10.28    1.37
  -8  -3  -5   12.65    1.53
  -8  -3  -5   10.58    2.10
  10  -4  -5    1.71    0.52
   9  -4  -5    1.54    0.46
  -9   4   5    0.65    1.10
  -9   4   5    1.39    0.57
  -9   4   5    1.46    0.56
   8  -4  -5   -0.18    0.37
   8  -4  -5    0.25    0.34
  -8   4   5    0.56    0.44
  -8   4   5   -1.28    0.93
  -8   4   5    0.72    0.51
   7  -4  -5    2.12    0.42
   7  -4  -5    1.15    0.36
  -7   4   5    1.57    0.46
  -7   4   5    1.63    0.44
  -7   4   5    1.55    0.51
  -7   4   5   -0.05    0.95
   6  -4  -5    1.44    0.42
  -6   4   5    1.08    0.39
  -6   4   5    1.89    0.58
  -6   4   5    0.38    0.85
  -6   4   5    1.41    0.50
   5  -4  -5   56.49    1.81
   5  -4  -5   54.27    1.65
  -5   4   5   57.97    2.09
  -5   4   5   56.20    1.86
  -5   4   5   57.36    1.74
  -5   4   5   54.20    2.01
  -5   4   5   50.28    2.54
   4  -4  -5    1.01    0.50
   4  -4  -5    0.68    0.34
  -4   4   5    0.62    0.36
  -4   4   5    1.47    0.48
  -4   4   5    0.88    0.68
  -4   4   5    1.42    0.48
  -4   4   5    0.91    0.47
   3  -4  -5  238.15    7.90
   3  -4  -5  237.14    6.07
  -3   4   5  237.54    6.29
  -3   4   5  232.54    6.17
  -3   4   5  234.60    6.84
  -3   4   5  232.52    6.88
  -3   4   5  229.60    7.75
   2  -4  -5   31.74    1.62
  -2   4   5   34.54    1.34
  -2   4   5   37.37    1.49
  -2   4   5   31.90    1.35
  -2   4   5   31.11    1.43
   1  -4  -5  107.09    3.25
   1  -4  -5  103.77    3.93
   1  -4  -5  106.89    3.49
  -1   4   5  106.83    3.42
  -1   4   5  104.98    3.40
  -1   4   5  105.63    3.22
  -1   4   5  108.30    3.24
   0  -4  -5  154.22    4.85
   0  -4  -5  165.41    4.61
   0  -4  -5  155.51    5.57
   0   4   5  154.62    4.54
   0   4   5  157.84    4.58
   0   4   5  157.87    4.84
   0   4   5  154.47    4.80
  -1  -4  -5    4.45    0.64
  -1  -4  -5    3.32    0.74
  -1  -4  -5    2.74    0.63
   1   4   5    3.63    0.56
   1   4   5    3.04    0.57
   1   4   5    3.62    0.60
  -2  -4  -5  110.42    4.31
  -2  -4  -5  115.89    3.84
  -2  -4  -5  111.97    3.82
   2   4   5  120.65    3.60
   2   4   5  112.49    3.70
  -3  -4  -5   -0.14    0.99
  -3  -4  -5    1.74    0.66
  -3  -4  -5    1.56    0.65
   3   4   5    2.04    0.65
  -4  -4  -5   53.38    2.29
  -4  -4  -5   50.31    2.26
  -4  -4  -5   43.96    3.06
  -5  -4  -5    0.03    0.77
  -5  -4  -5    0.53    0.78
  -5  -4  -5   -0.74    1.26
  -6  -4  -5    1.99    1.49
  -6  -4  -5    3.04    0.95
  -6  -4  -5    3.22    0.95
  -7  -4  -5    1.50    0.97
  -7  -4  -5    1.64    0.98
  -7  -4  -5    0.63    1.49
  -8  -4  -5   10.04    2.14
  -8  -4  -5    7.92    1.39
  -8  -4  -5    9.51    1.37
   9  -5  -5   15.24    1.00
  -9   5   5   20.16    2.03
   8  -5  -5    1.49    0.61
   8  -5  -5    1.59    0.43
  -8   5   5    1.51    0.57
  -8   5   5    0.81    1.09
  -8   5   5    1.80    0.50
   7  -5  -5   65.94    1.97
   7  -5  -5   66.21    2.17
  -7   5   5   60.33    3.19
  -7   5   5   65.74    2.17
  -7   5   5   61.41    2.22
  -7   5   5   70.47    2.08
   6  -5  -5    0.60    0.36
   6  -5  -5   -0.07    0.52
  -6   5   5    0.18    0.54
  -6   5   5    0.06    0.50
  -6   5   5   -0.52    0.78
  -6   5   5    0.38    0.41
   5  -5  -5   43.16    1.64
   5  -5  -5   43.48    1.44
  -5   5   5   43.46    1.52
  -5   5   5   38.42    2.21
  -5   5   5   44.44    1.61
  -5   5   5   41.40    1.75
  -5   5   5   41.46    1.72
   4  -5  -5    0.24    0.37
  -4   5   5   -0.04    0.71
  -4   5   5    0.29    0.38
  -4   5   5    0.10    0.45
  -4   5   5    0.36    0.46
  -4   5   5    0.02    0.44
  -3   5   5    5.05    0.86
  -3   5   5    2.92    0.56
  -3   5   5    4.70    0.65
  -3   5   5    5.02    0.60
  -2   5   5   20.55    1.20
  -2   5   5   17.40    1.15
  -2   5   5   20.02    1.41
   1  -5  -5    5.42    0.79
   1  -5  -5    4.75    0.77
  -1   5   5    5.01    0.68
  -1   5   5    4.50    0.66
   0  -5  -5   46.84    1.83
   0  -5  -5   45.97    2.18
   0  -5  -5   47.68    1.99
   0   5   5   47.65    1.78
   0   5   5   42.70    1.89
   0   5   5   46.94    1.90
  -1  -5  -5   66.47    2.56
  -1  -5  -5   67.97    2.37
  -1  -5  -5   63.80    2.83
   1   5   5   62.73    2.40
  -2  -5  -5    2.12    0.69
   2   5   5    2.78    0.67
  -3  -5  -5   29.84    1.67
  -3  -5  -5   26.16    2.43
  -3  -5  -5   31.69    1.77
   3   5   5   28.03    1.53
  -4  -5  -5   26.11    1.66
  -4  -5  -5   27.37    1.76
  -4  -5  -5   23.44    2.41
  -5  -5  -5   -0.22    0.82
  -5  -5  -5   -0.38    0.82
  -5  -5  -5    0.08    1.27
  -6  -5  -5   17.38    1.61
  -6  -5  -5   11.09    2.06
  -6  -5  -5   16.86    1.55
  -7  -5  -5    1.93    1.08
  -7  -5  -5    1.64    1.04
  -7  -5  -5    2.53    1.74
  -8  -5  -5   -2.71    1.42
  -8  -5  -5    1.84    1.16
  -8  -5  -5    1.07    1.07
  -9   6   5    7.95    1.61
   8  -6  -5    6.68    0.63
  -8   6   5    6.45    0.70
  -8   6   5    5.90    1.44
  -8   6   5    7.43    0.71
   7  -6  -5    2.56    0.52
  -7   6   5    3.44    0.62
  -7   6   5    2.37    1.18
  -7   6   5    3.30    0.56
  -7   6   5    2.78    0.66
   6  -6  -5    2.72    0.51
  -6   6   5    3.03    1.04
  -6   6   5    2.23    0.66
  -6   6   5    1.87    0.57
  -6   6   5    1.83    0.52
  -5   6   5   12.96    0.99
  -5   6   5   15.22    1.50
  -5   6   5   14.46    0.95
  -5   6   5   15.89    1.11
  -5   6   5   14.38    0.96
  -4   6   5    2.08    0.83
  -4   6   5    1.34    0.56
  -4   6   5    1.79    0.54
  -4   6   5    1.60    0.52
  -3   6   5   80.29    2.78
  -3   6   5   79.30    2.79
  -3   6   5   77.46    3.22
  -2   6   5   14.94    1.07
  -2   6   5   17.14    1.27
  -2   6   5   13.80    1.04
   1  -6  -5   39.05    1.74
  -1   6   5   35.59    1.84
  -1   6   5   36.16    1.69
  -1   6   5   38.05    1.68
   0  -6  -5   10.77    1.06
   0   6   5   12.12    1.02
   0   6   5   12.31    1.03
  -1  -6  -5    0.13    0.62
   1   6   5    0.22    0.56
  -2  -6  -5    0.96    0.71
   2   6   5    0.50    0.59
  -3  -6  -5   24.34    2.52
  -3  -6  -5   26.74    1.68
   3   6   5   26.41    1.68
  -4  -6  -5   -1.42    1.24
  -4  -6  -5    0.39    0.85
  -5  -6  -5   40.53    3.37
  -5  -6  -5   57.53    2.67
  -5  -6  -5   53.39    2.59
  -6  -6  -5    0.44    1.49
  -6  -6  -5    1.27    1.05
  -6  -6  -5    0.84    0.95
  -7  -6  -5   23.77    1.99
  -7  -6  -5   19.59    2.62
  -7  -6  -5   26.29    2.02
  -8   7   5   -0.10    1.18
  -7   7   5    2.00    0.61
  -7   7   5    1.51    0.65
  -7   7   5    0.46    1.08
  -6   7   5   19.80    1.88
  -6   7   5   20.89    1.18
  -6   7   5   20.57    1.29
  -5   7   5    3.53    0.75
  -5   7   5    1.73    1.03
  -5   7   5    3.04    0.69
  -4   7   5   68.05    3.12
  -4   7   5   74.82    2.61
  -4   7   5   63.40    2.54
  -3   7   5    0.86    0.76
  -3   7   5   -0.47    0.55
  -3   7   5   -0.22    0.58
  -2   7   5   33.02    1.88
  -2   7   5   33.13    1.65
  -2   7   5   30.75    1.62
  -1   7   5   43.32    2.14
  -1   7   5   43.10    1.88
  -1   7   5   43.50    1.99
   0  -7  -5    4.80    0.87
   0   7   5    6.62    0.97
   0   7   5    5.29    0.81
  -1  -7  -5  147.49    4.95
   1   7   5  147.49    4.84
  -2  -7  -5    1.35    0.86
   2   7   5    1.74    0.79
  -3  -7  -5   78.92    3.26
  -3  -7  -5   73.90    4.15
   3   7   5   81.90    3.15
  -4  -7  -5    0.09    1.48
  -4  -7  -5    0.84    0.88
  -5  -7  -5    4.19    1.70
  -5  -7  -5    4.94    1.18
  -6  -7  -5    0.88    1.65
  -6  -7  -5   -0.63    0.94
  -7  -7  -5    0.52    1.63
  -7  -7  -5    1.28    1.12
  -7  -7  -5    1.74    1.15
  -8   8   5   13.08    1.86
  -7   8   5    0.56    0.66
  -7   8   5    2.01    1.22
  -6   8   5   26.01    1.47
  -6   8   5   27.67    2.17
  -5   8   5    6.53    0.89
  -5   8   5    4.98    1.25
  -5   8   5    6.96    0.95
  -4   8   5   16.47    1.26
  -4   8   5   14.74    1.57
  -4   8   5   17.37    1.31
  -3   8   5   21.92    1.69
  -3   8   5   20.38    1.45
  -3   8   5   21.96    1.46
  -2   8   5    0.34    0.67
  -2   8   5    1.64    0.71
  -2   8   5    0.00    0.80
  -1   8   5   14.83    1.25
  -1   8   5   14.46    1.22
  -1   8   5   18.43    1.53
   0  -8  -5   37.23    2.02
   0   8   5   39.07    1.88
  -1  -8  -5    5.88    1.06
   1   8   5    5.63    0.95
  -2  -8  -5   15.33    1.53
   2   8   5   13.83    1.36
  -3  -8  -5    2.30    1.05
  -3  -8  -5    2.03    1.64
   3   8   5    1.39    0.91
  -4  -8  -5    0.96    0.95
  -4  -8  -5    1.24    1.56
  -5  -8  -5    7.06    1.98
  -5  -8  -5   10.35    1.49
  -6  -8  -5    1.64    1.78
  -6  -8  -5    0.61    1.10
  -7   9   5    0.90    1.19
  -7   9   5    1.76    0.74
  -6   9   5    0.76    0.71
  -6   9   5    1.41    1.16
  -5   9   5    0.11    0.74
  -5   9   5   -0.42    0.66
  -5   9   5    1.01    1.06
  -4   9   5   16.82    1.34
  -4   9   5   16.61    1.35
  -4   9   5   15.91    1.66
  -3   9   5    3.45    1.05
  -3   9   5    2.84    0.84
  -3   9   5    2.85    0.85
  -2   9   5   20.64    1.72
  -2   9   5   20.05    1.54
  -2   9   5   20.12    1.48
  -1   9   5    0.68    0.71
  -1   9   5   -0.19    0.77
   0   9   5    3.04    0.87
  -1  -9  -5    0.43    0.94
   1   9   5   -0.11    0.78
  -2  -9  -5    3.26    1.75
  -2  -9  -5    2.95    1.10
   2   9   5    3.19    0.98
  -3  -9  -5    0.56    1.01
  -3  -9  -5    0.98    1.64
   3   9   5   -0.27    0.85
  -4  -9  -5   21.53    2.66
  -4  -9  -5   21.41    1.93
  -5  -9  -5   -0.83    1.64
  -5  -9  -5   -1.30    1.03
  -6  10   5    3.76    0.87
  -6  10   5    4.06    1.32
  -5  10   5    7.99    1.44
  -5  10   5    6.88    1.09
  -5  10   5    5.54    0.97
  -4  10   5    1.24    0.80
  -4  10   5    0.62    1.00
  -4  10   5    1.94    0.89
  -3  10   5   22.54    1.62
  -3  10   5   18.77    1.55
  -3  10   5   20.46    1.81
  -2  10   5    7.26    1.16
  -2  10   5    7.33    1.11
  -1  10   5   11.33    1.28
   0  10   5   30.32    1.93
  -1 -10  -5   -0.16    1.00
   1  10   5    1.04    0.94
  -2 -10  -5   21.26    2.65
   2  10   5   26.54    1.97
  -3 -10  -5   -0.33    1.06
  -3 -10  -5    0.11    1.65
   3  10   5    0.18    1.06
  -4 -10  -5    9.92    1.58
  -4 -10  -5    8.96    2.14
  -5  11   5   10.99    1.31
  -5  11   5    6.71    1.42
  -5  11   5    7.56    1.10
  -4  11   5    0.39    0.94
  -4  11   5    2.78    1.21
  -4  11   5    2.29    0.89
  -3  11   5   -0.48    0.85
  -3  11   5   -0.27    0.87
  -2  11   5    8.92    1.32
  -2  11   5    8.25    1.21
  -1  11   5    0.53    0.91
   0  11   5   12.43    1.45
   1  11   5    4.84    1.21
  -2 -11  -5    0.41    1.12
  -2 -11  -5    2.46    1.75
   2  11   5    1.80    1.12
  -3 -11  -5    0.12    1.65
  -3 -11  -5    1.27    1.21
  -3  12   5   10.54    1.36
  -3  12   5    9.62    1.33
  -2  12   5    0.62    0.93
  -1  12   5    4.14    1.12
   0  12   5   -0.76    0.96
  -1 -12  -5    0.80    1.75
   1  12   5    0.53    1.07
   3  13  -6    3.63    1.34
  -3 -13   6    5.19    1.33
   2  13  -6   16.78    1.74
   1  13  -6    0.41    0.98
   0  13  -6    3.44    1.20
  -1  13  -6    4.97    1.19
  -2  13  -6    0.43    1.05
  -2  13  -6    0.78    1.01
  -3  13  -6    0.01    0.98
  -3  13  -6    0.86    1.00
  -4 -12   6    0.78    1.09
   3  12  -6   23.08    1.96
  -3 -12   6   26.28    2.04
   2  12  -6   -0.99    0.98
  -2 -12   6   -0.13    0.95
   1  12  -6    4.31    1.19
   1  12  -6    4.39    1.90
   0  12  -6    1.93    1.65
   0  12  -6    0.60    0.94
  -1  12  -6   -0.95    0.91
  -1  12  -6   -1.71    1.41
  -2  12  -6    3.01    1.08
  -2  12  -6    3.85    1.84
  -2  12  -6    4.60    1.14
  -3  12  -6    3.39    1.07
  -3  12  -6    3.02    1.07
  -4  12  -6    1.07    0.92
  -4  12  -6    0.07    0.98
  -6 -11   6    3.24    1.21
  -5 -11   6    6.01    1.28
  -4 -11   6    5.38    1.20
   3  11  -6   -1.00    0.83
  -3 -11   6   -0.21    0.87
   2  11  -6    9.44    1.30
  -2 -11   6    6.72    1.23
   1  11  -6   27.43    1.99
  -1 -11   6   29.19    1.88
   0  11  -6    4.92    1.06
   0  11  -6    4.65    1.74
  -1  11  -6   58.40    2.79
  -1  11  -6   64.22    2.89
  -1  11  -6   68.29    4.26
  -2  11  -6    1.72    0.96
  -2  11  -6    1.37    0.92
  -2  11  -6   -0.19    1.38
  -3  11  -6   20.74    1.66
  -3  11  -6   19.65    1.60
  -3  11  -6   15.92    2.46
  -4  11  -6    6.01    1.91
  -4  11  -6    7.47    1.19
  -4  11  -6    6.25    1.09
  -5  11  -6    2.97    1.65
  -5  11  -6    2.06    0.92
  -5  11  -6    1.58    0.96
  -6  11  -6    6.67    1.02
  -6 -10   6   19.09    1.81
  -5 -10   6   11.54    1.44
  -4 -10   6    5.26    1.15
   3  10  -6   25.73    1.89
  -3 -10   6   24.95    1.70
   2  10  -6    0.50    0.91
  -2 -10   6    1.58    0.82
   1  10  -6   27.59    1.78
  -1 -10   6   27.76    1.76
   0  10  -6    0.83    0.87
  -1  10  -6    7.36    1.13
  -1  10  -6    7.01    1.12
  -1  10  -6    6.52    1.71
  -2  10  -6    1.20    0.87
  -2  10  -6    1.02    0.77
  -2  10  -6    0.30    1.42
  -3  10  -6    4.94    1.01
  -3  10  -6    4.92    0.99
  -3  10  -6    3.16    1.58
  -4  10  -6    0.34    0.82
  -4  10  -6    1.24    1.53
  -4  10  -6    1.37    0.83
  -5  10  -6   26.78    2.98
  -5  10  -6   30.49    2.87
  -5  10  -6   26.69    1.72
  -5  10  -6   32.84    1.95
  -6  10  -6   -0.15    1.48
  -6  10  -6    0.14    0.77
  -7  -9   6    1.22    1.10
  -7  -9   6    0.42    0.98
  -6  -9   6    2.24    0.94
  -5  -9   6    7.68    1.17
  -4  -9   6   19.62    1.56
   3   9  -6    1.59    0.90
  -3  -9   6    1.42    0.84
   2   9  -6   21.26    1.59
  -2  -9   6   19.55    1.44
   1   9  -6   16.57    1.38
  -1  -9   6   17.80    1.38
   0   9  -6    3.99    0.88
   0  -9   6    4.26    0.85
  -1   9  -6   31.50    1.86
  -1   9  -6   30.01    2.74
  -1   9  -6   35.87    1.91
  -2   9  -6    4.64    0.92
  -2   9  -6    4.88    1.66
  -2   9  -6    5.02    0.97
  -3   9  -6   11.13    1.99
  -3   9  -6   16.47    1.36
  -3   9  -6   15.05    1.30
  -4   9  -6   18.76    1.46
  -4   9  -6   15.59    1.33
  -4   9  -6   15.69    2.29
  -5   9  -6    0.18    1.32
  -5   9  -6    0.63    1.35
  -5   9  -6    0.64    0.73
  -5   9  -6    0.11    0.78
  -6   9  -6    7.54    0.97
  -6   9  -6    6.63    1.79
  -7   9  -6    7.01    0.90
  -7   9  -6    5.57    1.85
  -8  -8   6   11.64    1.39
  -8  -8   6   11.00    1.45
  -7  -8   6    0.54    0.86
  -7  -8   6    1.00    0.94
  -6  -8   6   10.38    1.28
  -6  -8   6   13.03    1.43
  -5  -8   6    4.70    1.02
  -5  -8   6    3.27    0.93
  -4  -8   6    1.48    0.78
   3   8  -6    9.71    1.09
  -3  -8   6   10.65    1.17
   2   8  -6   22.57    1.46
  -2  -8   6   20.46    1.52
   1   8  -6    0.28    0.67
  -1  -8   6    1.08    0.66
   0   8  -6  117.82    4.06
   0   8  -6  117.60    4.05
   0  -8   6  121.14    3.98
  -1   8  -6    0.07    0.66
  -1   8  -6   -1.16    1.05
  -1   8  -6    0.34    0.62
  -2   8  -6  113.45    3.77
  -2   8  -6   97.06    5.15
  -3   8  -6   33.68    1.71
  -3   8  -6   24.11    2.64
  -4   8  -6   24.51    2.65
  -4   8  -6   30.44    1.66
  -5   8  -6   25.98    2.76
  -5   8  -6   28.04    2.55
  -5   8  -6   31.29    1.64
  -6   8  -6   -0.29    1.23
  -6   8  -6   -1.09    1.32
  -6   8  -6    0.08    0.68
  -7   8  -6   10.13    0.96
  -7   8  -6   10.73    2.03
  -8  -7   6   -0.71    0.80
  -8  -7   6    1.40    0.93
  -7  -7   6   28.96    1.90
  -7  -7   6   30.21    1.84
  -6  -7   6    4.93    1.00
  -6  -7   6    4.38    1.00
  -5  -7   6   18.67    1.48
  -5  -7   6   19.94    1.52
  -4  -7   6   90.08    3.43
  -4  -7   6   99.52    3.54
   3   7  -6    6.93    0.93
  -3  -7   6    4.71    0.84
   2   7  -6  172.52    5.44
  -2  -7   6  173.22    6.26
  -2  -7   6  175.39    5.45
   1   7  -6    1.03    0.65
  -1  -7   6    1.25    0.65
  -1  -7   6    2.03    0.64
   0   7  -6   56.91    2.35
   0  -7   6   57.15    2.25
  -1   7  -6    9.73    1.69
  -1   7  -6    7.91    0.91
  -1   7  -6    8.29    0.89
   1  -7   6    9.35    0.88
  -2   7  -6   -0.09    0.61
  -2   7  -6    0.34    0.60
  -2   7  -6    0.70    1.08
  -3   7  -6    0.60    1.10
  -3   7  -6    0.43    0.65
  -3   7  -6   -0.48    0.59
  -4   7  -6   33.20    1.67
  -4   7  -6   27.52    2.27
  -4   7  -6   35.75    1.72
  -4   7  -6   21.71    2.40
  -5   7  -6    7.84    1.55
  -5   7  -6    6.18    1.62
  -5   7  -6   10.05    1.09
  -5   7  -6    8.51    0.97
  -6   7  -6   18.38    1.25
  -6   7  -6   16.47    2.11
  -6   7  -6   14.55    2.23
   6  -7   6   21.02    1.20
  -7   7  -6   -1.33    1.32
  -7   7  -6    2.32    1.55
  -7   7  -6    0.11    0.62
  -8   7  -6    2.07    0.82
  -8   7  -6    1.54    1.58
  -9  -6   6   14.16    1.41
  -9  -6   6   11.94    1.33
  -8  -6   6    1.02    0.85
  -8  -6   6    2.65    0.93
  -7  -6   6    2.54    0.88
  -7  -6   6    2.92    0.89
  -6  -6   6   13.17    1.27
  -6  -6   6   12.58    1.23
  -5  -6   6   30.38    1.66
  -5  -6   6   31.79    1.76
  -4  -6   6    8.91    0.98
  -4  -6   6    7.03    0.89
   3   6  -6  102.28    3.39
  -3  -6   6  100.57    3.46
  -3  -6   6   97.91    3.39
   2   6  -6    0.18    0.60
   2   6  -6    0.62    0.51
   2   6  -6    0.95    0.60
  -2  -6   6    0.71    0.49
  -2  -6   6    0.52    0.61
  -2  -6   6    1.10    0.52
   1   6  -6   33.23    1.72
   1   6  -6   33.37    1.44
   1   6  -6   29.61    1.41
   1   6  -6   29.66    1.53
  -1  -6   6   32.02    1.70
  -1  -6   6   28.27    1.45
   0   6  -6   18.85    1.21
   0   6  -6   19.75    1.32
   0   6  -6   19.44    1.25
   0   6  -6   20.28    1.11
   0  -6   6   18.21    1.21
   0  -6   6   16.99    1.25
  -1   6  -6    5.26    0.75
  -1   6  -6    4.54    0.74
   1  -6   6    2.42    0.57
  -2   6  -6   59.56    2.29
  -2   6  -6   59.87    2.30
  -2   6  -6   50.60    3.21
  -3   6  -6    6.65    0.86
  -3   6  -6    4.87    1.32
  -3   6  -6    7.51    0.85
  -4   6  -6   13.62    1.15
  -4   6  -6   12.77    1.07
  -4   6  -6    9.16    1.62
  -4   6  -6   12.96    1.60
   4  -6   6   16.01    0.99
  -5   6  -6   10.31    1.09
  -5   6  -6    9.65    0.98
  -5   6  -6   10.56    0.86
  -5   6  -6   12.09    1.72
  -5   6  -6    9.40    1.78
   5  -6   6   11.60    0.84
  -6   6  -6    0.01    1.29
  -6   6  -6    0.56    1.28
  -6   6  -6    0.97    0.69
   6  -6   6    0.55    0.55
  -7   6  -6    4.95    1.69
  -7   6  -6    2.86    1.59
  -7   6  -6    4.66    0.77
   7  -6   6    6.26    0.79
  -8   6  -6   19.36    2.44
  -8   6  -6   16.33    0.99
   8  -6   6   12.53    1.04
  -9  -5   6    5.69    1.00
  -9  -5   6    8.25    1.13
  -8  -5   6    0.96    0.74
  -8  -5   6    1.58    0.80
  -7  -5   6   22.11    1.50
  -7  -5   6   24.16    1.58
  -6  -5   6    4.25    0.81
  -6  -5   6    3.32    0.82
  -5  -5   6   30.25    1.62
  -5  -5   6   28.28    1.60
  -4  -5   6    3.17    0.69
  -4  -5   6    4.08    0.69
   3   5  -6   -0.56    0.50
  -3  -5   6    0.33    0.48
  -3  -5   6    1.53    0.51
   2   5  -6    0.54    0.57
   2   5  -6    0.10    0.46
   2   5  -6    0.18    0.46
  -2  -5   6    0.52    0.45
  -2  -5   6    0.40    0.45
  -2  -5   6    0.08    0.53
  -2  -5   6    0.25    0.47
   1   5  -6  191.11    5.51
   1   5  -6  197.47    5.88
   1   5  -6  187.72    6.67
  -1  -5   6  194.94    5.81
  -1  -5   6  195.72    6.70
  -1  -5   6  192.08    5.50
   0   5  -6    2.87    0.65
   0   5  -6    2.88    0.63
   0   5  -6    4.36    0.70
   0   5  -6    3.13    0.55
   0  -5   6    3.93    0.55
   0  -5   6    1.53    0.61
   0  -5   6    2.24    0.56
   0  -5   6    3.18    0.66
  -1   5  -6  263.75    7.93
  -1   5  -6  269.45    7.98
  -1   5  -6  269.91    8.97
   1  -5   6  266.39    9.06
   1  -5   6  280.53    9.05
   1  -5   6  265.43    7.79
  -2   5  -6   14.51    1.08
  -2   5  -6   14.89    1.11
  -2   5  -6   10.98    1.55
  -3   5  -6   71.79    2.54
  -3   5  -6   69.98    2.20
  -3   5  -6   67.27    2.54
  -3   5  -6   67.90    3.14
  -3   5  -6   59.54    3.45
   3  -5   6   67.96    2.11
  -4   5  -6   34.22    2.35
  -4   5  -6   32.91    2.65
  -4   5  -6   35.76    1.67
  -4   5  -6   38.56    1.76
  -4   5  -6   37.44    1.46
   4  -5   6   37.09    1.39
  -5   5  -6    2.30    0.77
  -5   5  -6    2.42    0.71
  -5   5  -6    2.58    1.11
  -5   5  -6    2.47    1.28
  -5   5  -6    2.28    0.60
   5  -5   6    2.00    0.54
  -6   5  -6   54.24    2.27
  -6   5  -6   58.90    2.13
  -6   5  -6   61.30    2.40
  -6   5  -6   59.54    3.48
  -6   5  -6   49.52    3.55
   6  -5   6   60.03    2.01
  -7   5  -6    0.09    1.29
  -7   5  -6   -0.24    0.64
  -7   5  -6    0.10    0.61
  -7   5  -6   -0.67    1.30
   7  -5   6    0.36    0.59
  -8   5  -6   18.34    2.37
  -8   5  -6   18.67    1.12
   8  -5   6   20.00    1.22
  -9  -4   6    1.94    0.76
  -8  -4   6   24.09    1.56
  -8  -4   6   29.95    1.63
  -7  -4   6    2.44    0.75
  -7  -4   6    2.39    0.81
  -6  -4   6   41.66    1.93
  -6  -4   6   43.26    1.97
  -5  -4   6  127.68    4.14
  -5  -4   6  126.96    4.14
  -4  -4   6   10.92    0.91
  -4  -4   6   10.86    0.91
   3   4  -6  218.45    7.62
   3   4  -6  218.38    6.57
   3   4  -6  221.96    6.26
   3   4  -6  225.51    7.61
  -3  -4   6  233.62    6.28
  -3  -4   6  217.05    6.60
  -3  -4   6  229.54    6.69
  -3  -4   6  219.14    7.51
   2   4  -6    2.56    0.66
   2   4  -6    2.10    0.55
   2   4  -6    1.76    0.61
   2   4  -6    2.64    0.53
  -2  -4   6    2.83    0.63
  -2  -4   6    3.03    0.53
  -2  -4   6    1.82    0.57
  -2  -4   6    1.28    0.49
   1   4  -6  104.07    4.05
   1   4  -6  113.87    3.64
   1   4  -6  114.60    3.38
   1   4  -6  109.34    3.61
  -1  -4   6  113.69    3.37
  -1  -4   6  110.38    3.55
  -1  -4   6  114.15    3.57
  -1  -4   6  107.18    4.04
   0   4  -6    1.47    0.50
   0   4  -6    1.10    0.57
   0   4  -6    0.70    0.54
   0   4  -6    0.84    0.53
   0  -4   6    1.09    0.56
   0  -4   6    1.21    0.44
   0  -4   6    1.56    0.50
   0  -4   6    0.84    0.58
  -1   4  -6   36.98    1.66
  -1   4  -6   36.80    1.51
  -1   4  -6   37.38    1.65
  -1   4  -6   40.80    1.80
   1  -4   6   37.37    1.81
   1  -4   6   37.43    1.81
   1  -4   6   40.35    1.49
   1  -4   6   38.60    1.59
  -2   4  -6   43.16    1.56
  -2   4  -6   41.87    2.69
  -2   4  -6   40.66    1.88
  -2   4  -6   46.30    1.88
   2  -4   6   45.24    1.50
   2  -4   6   42.96    2.03
   2  -4   6   45.27    2.07
  -3   4  -6   30.39    1.26
  -3   4  -6   23.04    1.82
  -3   4  -6   28.48    1.49
  -3   4  -6   30.84    1.63
  -3   4  -6   25.96    2.21
  -3   4  -6   28.08    1.52
   3  -4   6   28.59    1.14
  -4   4  -6   39.61    1.67
  -4   4  -6   41.13    2.07
  -4   4  -6   36.92    1.76
  -4   4  -6   33.48    2.45
  -4   4  -6   40.64    1.54
  -4   4  -6   38.43    1.81
  -4   4  -6   38.54    2.32
   4  -4   6   37.39    1.42
  -5   4  -6   77.50    2.47
  -5   4  -6   71.39    2.77
  -5   4  -6   77.23    3.37
  -5   4  -6   78.48    2.86
  -5   4  -6   77.44    3.75
  -5   4  -6   72.43    3.96
   5  -4   6   78.21    2.38
  -6   4  -6    0.85    1.22
  -6   4  -6   -0.02    0.58
  -6   4  -6    0.85    0.63
  -6   4  -6   -0.71    0.71
  -6   4  -6   -0.76    1.16
   6  -4   6    0.34    0.52
  -7   4  -6   18.33    2.23
  -7   4  -6   20.66    1.35
  -7   4  -6   15.93    2.20
  -7   4  -6   14.82    1.15
   7  -4   6   20.02    1.25
  -8   4  -6    2.32    0.68
  -8   4  -6    0.85    1.43
   8  -4   6    0.74    0.66
 -10  -3   6   13.66    1.09
  -9  -3   6    2.93    0.76
  -8  -3   6    3.76    0.84
  -8  -3   6    3.46    0.73
  -7  -3   6   14.19    1.15
  -7  -3   6   12.69    1.06
   6   3  -6    3.37    0.55
  -6  -3   6    3.63    0.71
  -6  -3   6    2.85    0.67
   5   3  -6   50.09    1.71
  -5  -3   6   48.27    1.98
  -5  -3   6   50.10    1.76
  -5  -3   6   49.73    1.98
  -4  -3   6   41.61    1.53
  -4  -3   6   44.18    1.78
  -4  -3   6   40.90    1.74
   3   3  -6   27.01    1.48
   3   3  -6   25.33    1.23
   3   3  -6   26.23    1.29
   3   3  -6   27.44    1.47
  -3  -3   6   25.18    1.32
  -3  -3   6   25.74    1.35
  -3  -3   6   27.98    1.36
  -3  -3   6   26.82    1.19
   2   3  -6   60.39    2.06
   2   3  -6   58.39    2.49
   2   3  -6   61.79    2.50
   2   3  -6   57.00    2.14
  -2  -3   6   59.34    2.13
  -2  -3   6   61.21    2.04
  -2  -3   6   63.64    2.20
  -2  -3   6   59.50    2.43
   1   3  -6  125.98    4.55
   1   3  -6  124.29    4.56
   1   3  -6  131.55    4.01
   1   3  -6  123.29    3.75
  -1  -3   6  127.07    3.95
  -1  -3   6  131.07    4.01
  -1  -3   6  127.99    4.53
  -1  -3   6  127.23    4.54
  -1  -3   6  128.94    3.74
   0   3  -6    1.06    0.51
   0   3  -6    0.20    0.43
   0   3  -6   -0.11    0.47
   0   3  -6    0.29    0.53
   0  -3   6    0.12    0.37
   0  -3   6   -0.36    0.45
   0  -3   6   -0.17    0.38
   0  -3   6    0.19    0.49
  -1   3  -6  246.40    6.57
  -1   3  -6  245.35    6.88
  -1   3  -6  242.35    7.33
  -1   3  -6  255.99    7.41
  -1   3  -6  249.64    8.28
  -1   3  -6  242.30    9.20
   1  -3   6  243.80    7.19
   1  -3   6  264.89    8.35
   1  -3   6  244.36    8.34
   1  -3   6  250.53    6.83
  -2   3  -6   10.88    0.85
  -2   3  -6   11.25    1.32
  -2   3  -6   10.50    1.12
  -2   3  -6   10.83    0.74
  -2   3  -6   10.51    0.97
  -2   3  -6   13.31    0.95
  -2   3  -6   11.88    0.98
  -2   3  -6   12.86    0.98
  -2   3  -6   12.55    0.89
   2  -3   6   13.75    1.12
   2  -3   6   12.02    0.99
   2  -3   6   12.81    0.73
   2  -3   6   12.83    0.84
  -3   3  -6   42.03    1.87
  -3   3  -6   43.95    1.98
  -3   3  -6   42.06    1.66
  -3   3  -6   42.52    1.56
  -3   3  -6   45.05    1.86
  -3   3  -6   38.00    2.38
  -3   3  -6   43.05    2.26
   3  -3   6   40.83    1.44
  -4   3  -6   24.75    1.20
  -4   3  -6   25.37    1.99
  -4   3  -6   26.51    1.67
  -4   3  -6   24.41    1.82
  -4   3  -6   25.89    1.40
  -4   3  -6   23.34    1.28
  -4   3  -6   26.90    1.56
   4  -3   6   25.18    1.12
  -5   3  -6    3.53    1.02
  -5   3  -6    2.72    0.70
  -5   3  -6    2.57    1.12
  -5   3  -6    4.43    0.86
  -5   3  -6    2.19    1.15
  -5   3  -6    2.99    0.63
   5  -3   6    2.90    0.54
  -6   3  -6    4.64    0.83
  -6   3  -6    4.46    1.42
  -6   3  -6    6.18    0.99
  -6   3  -6    2.65    1.24
  -6   3  -6    5.51    0.79
  -6   3  -6    3.85    1.26
   6  -3   6    4.26    0.64
  -7   3  -6   13.85    1.98
  -7   3  -6   10.95    1.08
  -7   3  -6   12.44    1.77
  -7   3  -6   13.49    2.02
   7  -3   6   13.66    1.02
  -8   3  -6   -0.45    0.66
  -8   3  -6    1.23    1.49
 -10  -2   6    2.08    0.63
  -9  -2   6    1.86    0.65
   8   2  -6   19.84    1.16
  -8  -2   6   16.00    1.14
   7   2  -6    4.23    0.59
  -7  -2   6    6.11    0.81
  -7  -2   6    6.17    0.75
   6   2  -6   53.69    1.78
  -6  -2   6   52.41    2.03
  -6  -2   6   53.48    1.83
  -6  -2   6   56.21    2.11
   5   2  -6    1.88    0.43
  -5  -2   6    1.58    0.52
  -5  -2   6    2.47    0.60
  -5  -2   6    2.68    0.51
  -5  -2   6    2.20    0.46
   4   2  -6   15.62    0.82
   4   2  -6   13.22    1.06
  -4  -2   6   15.02    0.89
  -4  -2   6   14.85    1.02
  -4  -2   6   14.99    0.84
  -4  -2   6   12.79    0.94
  -4  -2   6   15.42    1.05
   3   2  -6    0.59    0.53
   3   2  -6    1.53    0.47
   3   2  -6    0.78    0.54
   3   2  -6    0.65    0.45
   3   2  -6    0.70    0.39
  -3  -2   6    0.81    0.45
  -3  -2   6    0.20    0.38
  -3  -2   6    1.41    0.48
  -3  -2   6    0.84    0.44
  -3  -2   6    0.71    0.39
  -3  -2   6    1.55    0.52
   2   2  -6   50.14    1.89
   2   2  -6   46.25    2.12
   2   2  -6   52.71    2.15
   2   2  -6   46.79    1.73
  -2  -2   6   51.09    1.66
  -2  -2   6   47.77    1.66
  -2  -2   6   49.93    2.10
  -2  -2   6   46.32    1.82
  -2  -2   6   51.05    1.91
  -2  -2   6   47.26    2.03
  -2  -2   6   48.31    1.72
   1   2  -6    7.10    0.75
   1   2  -6    6.33    0.63
   1   2  -6    5.54    0.77
  -1  -2   6    5.53    0.61
  -1  -2   6    6.61    0.62
  -1  -2   6    5.71    0.72
  -1  -2   6    6.81    0.77
  -1  -2   6    6.31    0.65
   0   2  -6  261.48    8.87
   0   2  -6  272.49    7.88
   0   2  -6  271.51    7.34
   0   2  -6  264.72    7.80
   0  -2   6  262.49    7.28
   0  -2   6  268.80    7.71
   0  -2   6  268.46    8.87
   0  -2   6  264.86    8.89
  -1   2  -6    3.16    0.64
  -1   2  -6    2.44    0.77
  -1   2  -6    0.67    0.53
  -1   2  -6    2.26    0.52
  -1   2  -6    2.59    0.48
  -1   2  -6    2.27    0.65
   1  -2   6    2.46    0.62
   1  -2   6    2.63    0.49
   1  -2   6    2.27    0.48
   1  -2   6    4.13    0.69
  -2   2  -6  298.19   10.68
  -2   2  -6  299.48    9.34
  -2   2  -6  290.00    9.69
  -2   2  -6  289.26    8.09
  -2   2  -6  297.27    7.76
  -2   2  -6  297.36    7.86
  -2   2  -6  292.70    8.64
  -2   2  -6  298.43    9.76
   2  -2   6  293.38    8.46
   2  -2   6  288.02    9.80
   2  -2   6  293.08    8.03
   2  -2   6  295.09    7.59
   2  -2   6  307.01    9.85
  -3   2  -6   70.33    2.61
  -3   2  -6   67.28    3.25
  -3   2  -6   72.20    2.23
  -3   2  -6   68.59    3.06
  -3   2  -6   70.82    2.77
  -3   2  -6   68.34    2.30
   3  -2   6   70.61    2.12
  -4   2  -6   52.07    2.81
  -4   2  -6   55.32    2.53
  -4   2  -6   57.57    2.96
  -4   2  -6   55.85    2.00
  -4   2  -6   54.56    1.96
  -4   2  -6   57.56    2.31
   4  -2   6   58.56    1.85
  -5   2  -6  125.57    4.13
  -5   2  -6  111.87    4.91
  -5   2  -6  123.47    5.26
  -5   2  -6  122.53    3.61
  -5   2  -6  119.65    4.65
   5  -2   6  121.05    3.46
  -6   2  -6    2.05    1.20
  -6   2  -6    3.09    1.21
  -6   2  -6    2.74    0.90
  -6   2  -6    3.68    1.29
  -6   2  -6    2.15    0.67
   6  -2   6    1.67    0.56
  -7   2  -6   26.40    2.35
  -7   2  -6   28.09    2.61
  -7   2  -6   26.30    2.57
   7  -2   6   27.32    1.48
  -8   2  -6    0.68    1.34
  -8   2  -6    0.10    0.71
  -8   2  -6    0.69    1.38
  -9   2  -6    5.20    1.87
  -9   2  -6    2.51    0.73
  10   1  -6    4.97    0.77
   9   1  -6   23.54    1.26
  -9  -1   6   23.66    1.23
  -9  -1   6   22.37    1.24
   8   1  -6    2.75    0.56
  -8  -1   6    1.57    0.55
  -8  -1   6    3.20    0.64
   7   1  -6   37.44    1.41
   7   1  -6   38.20    1.57
  -7  -1   6   39.66    1.70
  -7  -1   6   38.18    1.58
  -7  -1   6   35.85    1.59
  -7  -1   6   37.57    1.45
   6   1  -6   15.11    0.99
   6   1  -6   14.17    0.85
  -6  -1   6   15.50    1.10
  -6  -1   6   13.58    1.00
  -6  -1   6   15.89    1.19
  -6  -1   6   13.97    0.89
  -6  -1   6   13.61    0.85
   5   1  -6    9.96    0.73
   5   1  -6    9.15    0.63
  -5  -1   6    9.42    0.66
  -5  -1   6   10.46    0.85
  -5  -1   6   10.06    0.81
  -5  -1   6    9.51    0.73
  -5  -1   6   11.05    1.01
   4   1  -6  190.38    4.97
   4   1  -6  183.01    6.49
  -4  -1   6  194.70    5.11
  -4  -1   6  191.45    5.65
  -4  -1   6  189.58    5.67
  -4  -1   6  185.66    5.06
  -4  -1   6  186.29    6.22
   3   1  -6   16.96    1.03
   3   1  -6   22.03    1.09
   3   1  -6   18.43    1.22
   3   1  -6   19.95    1.01
   3   1  -6   20.48    1.28
  -3  -1   6   19.25    1.06
  -3  -1   6   20.92    1.17
  -3  -1   6   21.57    0.97
  -3  -1   6   20.89    1.12
  -3  -1   6   20.68    1.00
  -3  -1   6   21.41    1.00
   2   1  -6  554.00   14.69
   2   1  -6  525.99   17.87
   2   1  -6  548.67   15.59
   2   1  -6  549.61   13.97
  -2  -1   6  564.33   15.71
  -2  -1   6  540.42   15.58
  -2  -1   6  567.33   14.19
  -2  -1   6  580.00   17.82
  -2  -1   6  565.50   14.66
  -2  -1   6  566.97   17.83
   1   1  -6   36.14    1.42
   1   1  -6   34.01    1.71
   1   1  -6   39.01    1.66
  -1  -1   6   36.89    1.69
  -1  -1   6   35.43    1.49
  -1  -1   6   35.20    1.48
  -1  -1   6   34.19    1.37
   0   1  -6  319.84   10.91
   0   1  -6  327.90    8.99
   0   1  -6  345.35   10.59
   0  -1   6  326.45    8.96
   0  -1   6  341.49   10.93
   0  -1   6  335.73    9.49
   0  -1   6  329.30   10.93
  -1   1  -6    4.17    0.67
  -1   1  -6    4.30    0.81
  -1   1  -6    5.65    0.75
  -1   1  -6    5.58    0.63
  -1   1  -6    4.67    0.73
  -1   1  -6    4.80    0.74
  -1   1  -6    5.34    0.58
   1  -1   6    4.12    0.57
   1  -1   6    5.87    0.66
   1  -1   6    4.23    0.71
  -2   1  -6    1.47    0.47
  -2   1  -6    1.24    0.59
  -2   1  -6    1.89    0.73
  -2   1  -6    0.11    0.62
  -2   1  -6    2.52    0.58
  -2   1  -6    1.49    0.69
  -2   1  -6    1.20    0.64
   2  -1   6    1.75    0.51
   2  -1   6    1.25    0.65
   2  -1   6    1.96    0.50
  -3   1  -6    4.20    0.73
  -3   1  -6    3.58    0.90
  -3   1  -6    4.74    0.88
  -3   1  -6    4.67    0.87
  -3   1  -6    4.77    0.60
   3  -1   6    3.75    0.51
  -4   1  -6   51.77    2.57
  -4   1  -6   48.72    1.81
  -4   1  -6   47.20    2.60
  -4   1  -6   48.33    2.42
  -4   1  -6   49.20    2.14
   4  -1   6   51.16    1.73
  -5   1  -6   11.80    1.47
  -5   1  -6   11.64    1.51
  -5   1  -6   11.13    0.95
  -5   1  -6   12.18    1.20
  -5   1  -6   10.98    1.39
   5  -1   6   12.25    0.86
  -6   1  -6   26.93    1.68
  -6   1  -6   25.01    2.21
  -6   1  -6   24.16    2.19
  -6   1  -6   23.80    2.11
   6  -1   6   21.81    1.31
  -7   1  -6    0.89    1.27
  -7   1  -6    0.73    0.87
  -7   1  -6    0.60    1.26
  -8   1  -6   -0.59    1.37
  -8   1  -6    2.05    1.55
  -9   1  -6    5.06    1.88
  -9   1  -6    5.87    0.93
  10   0  -6    0.75    0.56
   9   0  -6   11.32    0.85
  -9   0   6   11.67    0.88
  -9   0   6   10.92    0.80
   8   0  -6    9.38    0.86
   8   0  -6    9.53    0.75
  -8   0   6   10.81    0.80
  -8   0   6   12.13    0.90
  -8   0   6   12.43    0.84
   7   0  -6    3.00    0.49
   7   0  -6    3.61    0.60
  -7   0   6    4.03    0.58
  -7   0   6    4.44    0.64
  -7   0   6    2.96    0.52
  -7   0   6    3.72    0.92
   6   0  -6   58.26    1.83
   6   0  -6   57.64    1.89
  -6   0   6   60.69    2.21
  -6   0   6   56.26    2.12
  -6   0   6   56.26    1.86
  -6   0   6   63.16    2.58
  -6   0   6   61.23    1.97
   5   0  -6   26.28    1.04
   5   0  -6   26.05    1.13
  -5   0   6   24.44    1.29
  -5   0   6   25.98    1.06
  -5   0   6   27.43    1.33
  -5   0   6   26.07    1.12
  -5   0   6   26.18    1.52
   4   0  -6   81.74    2.38
   4   0  -6   82.18    2.35
   4   0  -6   80.80    3.20
  -4   0   6   80.41    2.44
  -4   0   6   81.17    2.75
  -4   0   6   84.68    2.77
  -4   0   6   80.41    3.13
  -4   0   6   82.75    2.77
  -4   0   6   84.17    2.44
   3   0  -6   97.11    3.74
   3   0  -6   98.47    2.83
   3   0  -6  102.04    2.85
   3   0  -6   99.30    3.04
  -3   0   6  101.96    3.27
  -3   0   6  102.25    3.53
  -3   0   6  102.46    2.89
  -3   0   6  100.87    3.03
  -3   0   6   96.45    3.23
  -3   0   6  100.55    2.89
   2   0  -6    1.25    0.61
   2   0  -6    0.81    0.42
   2   0  -6    0.93    0.46
   2   0  -6    1.25    0.55
  -2   0   6    0.14    0.40
  -2   0   6    0.90    0.51
  -2   0   6    1.50    0.47
  -2   0   6    1.43    0.51
  -2   0   6    1.87    0.52
  -2   0   6    0.57    0.46
  -2   0   6    1.51    0.41
   1   0  -6    3.44    0.69
   1   0  -6    3.57    0.56
   1   0  -6    3.54    0.62
  -1   0   6    2.83    0.50
  -1   0   6    3.49    0.64
  -1   0   6    2.87    0.53
  -1   0   6    4.05    0.51
  -1   0   6    3.52    0.64
  -1   0   6    2.94    0.52
   0   0  -6  107.76    4.22
   0   0  -6  117.93    3.99
   0   0  -6  118.10    3.77
   0   0  -6  121.28    3.55
   0   0   6  114.52    3.49
   0   0   6  124.50    4.29
   0   0   6  116.93    3.73
   0   0   6  119.82    3.68
  -1   0  -6    2.35    0.60
  -1   0  -6    1.83    0.62
  -1   0  -6    2.48    0.57
  -1   0  -6    2.78    0.66
  -1   0  -6    1.31    0.59
  -1   0  -6    2.32    0.75
   1   0   6    1.96    0.64
   1   0   6    2.43    0.53
   1   0   6    2.01    0.49
  -2   0  -6  143.47    5.21
  -2   0  -6  138.27    4.92
  -2   0  -6  142.55    4.97
  -2   0  -6  136.85    4.95
  -2   0  -6  138.39    4.15
  -2   0  -6  133.77    4.42
   2   0   6  143.62    4.31
   2   0   6  144.77    5.06
   2   0   6  136.19    4.14
   2   0   6  136.96    4.10
  -3   0  -6    4.98    0.83
  -3   0  -6    4.56    0.95
  -3   0  -6    4.72    0.79
  -3   0  -6    3.86    0.74
  -3   0  -6    4.60    0.88
  -4   0  -6   51.92    2.28
  -4   0  -6   55.01    2.64
  -4   0  -6   49.92    2.62
  -4   0  -6   54.33    2.66
  -4   0  -6   53.91    2.25
  -5   0  -6    0.23    0.93
  -5   0  -6    3.42    0.92
  -5   0  -6    1.68    0.93
  -5   0  -6    2.75    1.09
  -6   0  -6    1.63    1.19
  -6   0  -6    2.85    0.97
  -6   0  -6    2.25    1.18
  -7   0  -6   -2.29    1.10
  -7   0  -6   -1.96    0.82
  -7   0  -6   -0.63    1.24
  -8   0  -6   23.87    2.56
  -9   0  -6   -1.00    1.54
  10  -1  -6   -0.04    0.52
   9  -1  -6   10.02    0.87
   9  -1  -6    9.48    0.75
  -9   1   6    9.74    0.82
  -9   1   6   11.06    0.92
   8  -1  -6    3.90    0.53
   8  -1  -6    3.71    0.63
  -8   1   6    3.15    0.54
  -8   1   6    5.58    1.17
  -8   1   6    3.29    0.58
  -8   1   6    3.14    0.65
   7  -1  -6   38.06    1.36
  -7   1   6   38.99    1.52
  -7   1   6   37.70    1.55
  -7   1   6   37.95    2.13
  -7   1   6   38.66    1.42
   6  -1  -6    2.19    0.41
   6  -1  -6    1.97    0.45
  -6   1   6    4.03    0.67
  -6   1   6    3.09    0.51
  -6   1   6    2.18    0.55
  -6   1   6    2.29    0.46
  -6   1   6    2.87    0.84
   5  -1  -6   14.17    0.77
   5  -1  -6   14.76    0.80
  -5   1   6   15.23    0.88
  -5   1   6   14.93    0.81
  -5   1   6   16.28    1.13
  -5   1   6   14.62    1.25
  -5   1   6   12.87    0.93
   4  -1  -6    4.65    0.75
   4  -1  -6    3.51    0.46
   4  -1  -6    4.13    0.46
  -4   1   6    6.60    0.56
  -4   1   6    4.84    0.86
  -4   1   6    4.04    0.63
  -4   1   6    3.27    0.47
  -4   1   6    3.85    0.61
   3  -1  -6    1.10    0.45
   3  -1  -6    1.96    0.63
   3  -1  -6    1.55    0.44
   3  -1  -6    2.04    0.41
  -3   1   6    1.90    0.48
  -3   1   6    1.89    0.48
  -3   1   6    1.97    0.41
  -3   1   6    2.09    0.52
  -3   1   6    4.66    0.53
   2  -1  -6   36.60    1.79
   2  -1  -6   35.76    1.58
   2  -1  -6   39.06    1.49
  -2   1   6   37.64    1.46
  -2   1   6   37.47    1.37
  -2   1   6   38.06    1.75
  -2   1   6   38.69    1.63
  -2   1   6   41.51    1.48
  -2   1   6   35.98    1.59
   1  -1  -6  127.11    4.73
   1  -1  -6  133.20    3.92
   1  -1  -6  133.68    4.17
  -1   1   6  134.78    3.88
  -1   1   6  130.06    4.11
  -1   1   6  132.66    4.08
  -1   1   6  136.40    4.67
  -1   1   6  131.72    4.69
   0  -1  -6   30.27    1.52
   0  -1  -6   31.44    1.35
   0  -1  -6   31.08    1.63
   0  -1  -6   32.48    1.41
   0  -1  -6   33.63    1.45
   0   1   6   31.93    1.61
   0   1   6   31.53    1.33
   0   1   6   31.69    1.49
   0   1   6   30.24    1.35
   0   1   6   30.19    1.46
  -1  -1  -6  321.19   10.12
  -1  -1  -6  317.33   10.77
  -1  -1  -6  304.98    9.20
  -1  -1  -6  301.51   10.39
  -1  -1  -6  316.90    9.18
  -1  -1  -6  308.04    8.58
   1   1   6  316.61    9.04
   1   1   6  316.11    8.56
   1   1   6  317.49    8.59
   1   1   6  319.09   10.43
  -2  -1  -6   34.77    1.62
  -2  -1  -6   30.00    1.66
  -2  -1  -6   31.58    1.71
  -2  -1  -6   32.12    1.92
  -2  -1  -6   33.63    1.44
  -2  -1  -6   33.69    1.60
  -2  -1  -6   33.48    1.81
   2   1   6   35.99    1.52
   2   1   6   29.74    1.43
   2   1   6   35.64    1.79
  -3  -1  -6   42.23    2.20
  -3  -1  -6   45.61    2.13
  -3  -1  -6   39.09    2.25
  -3  -1  -6   43.47    2.01
  -3  -1  -6   47.43    2.02
   3   1   6   44.17    1.78
  -4  -1  -6  128.32    4.93
  -4  -1  -6  128.86    4.23
  -4  -1  -6  124.71    4.92
  -4  -1  -6  126.78    4.86
  -4  -1  -6  118.61    4.16
  -5  -1  -6    0.49    0.80
  -5  -1  -6    0.13    0.71
  -5  -1  -6    1.51    1.06
  -5  -1  -6    0.06    1.02
  -6  -1  -6   65.71    3.60
  -6  -1  -6   65.38    2.81
  -6  -1  -6   62.75    3.50
  -6  -1  -6   74.01    2.97
  -7  -1  -6   -1.66    1.27
  -7  -1  -6    0.11    0.94
  -8  -1  -6   30.86    2.97
  -8  -1  -6   34.35    2.16
  10  -2  -6    4.71    0.75
  10  -2  -6    4.16    0.66
   9  -2  -6    2.78    0.63
   9  -2  -6    2.75    0.53
  -9   2   6    3.27    0.68
  -9   2   6    2.98    1.19
  -9   2   6    2.64    0.61
   8  -2  -6   14.45    0.87
  -8   2   6   15.46    1.66
  -8   2   6   14.80    0.96
  -8   2   6   14.57    0.80
  -8   2   6   13.65    0.90
   7  -2  -6    2.68    0.48
   7  -2  -6    3.63    0.49
  -7   2   6    3.27    0.55
  -7   2   6    3.43    1.05
  -7   2   6    3.66    0.57
  -7   2   6    3.87    0.60
   6  -2  -6   13.05    0.77
   6  -2  -6   11.14    0.75
  -6   2   6   12.58    0.78
  -6   2   6   15.27    1.03
  -6   2   6   12.25    0.81
  -6   2   6   11.93    1.27
  -6   2   6   12.47    0.92
   5  -2  -6  112.15    3.12
   5  -2  -6  114.99    3.17
  -5   2   6  112.31    4.28
  -5   2   6  119.79    3.24
  -5   2   6  115.33    3.67
  -5   2   6  114.62    3.27
  -5   2   6  112.35    3.68
   4  -2  -6    2.52    0.48
   4  -2  -6    1.76    0.38
  -4   2   6    2.07    0.54
  -4   2   6    2.88    0.45
  -4   2   6    2.66    0.54
  -4   2   6    3.36    0.53
  -4   2   6    2.30    0.73
   3  -2  -6  260.17    8.76
   3  -2  -6  258.28    6.84
   3  -2  -6  261.90    6.72
  -3   2   6  265.15    6.85
  -3   2   6  267.45    6.97
  -3   2   6  256.03    7.63
  -3   2   6  258.36    7.58
   2  -2  -6    1.49    0.60
   2  -2  -6    1.04    0.57
   2  -2  -6    0.43    0.45
   2  -2  -6    0.28    0.52
  -2   2   6    0.44    0.41
  -2   2   6   -0.01    0.46
  -2   2   6    0.75    0.54
  -2   2   6    0.83    0.48
  -2   2   6    0.86    0.41
  -2   2   6    0.15    0.43
  -2   2   6    0.68    0.46
   1  -2  -6  121.60    4.37
   1  -2  -6  113.85    3.54
   1  -2  -6  117.95    3.86
  -1   2   6  119.48    3.54
  -1   2   6  118.90    3.76
  -1   2   6  114.36    3.71
  -1   2   6  121.36    3.56
   0  -2  -6   51.51    1.86
   0  -2  -6   46.70    2.21
   0  -2  -6   51.12    2.05
   0   2   6   49.22    1.96
   0   2   6   48.95    1.97
   0   2   6   48.50    1.83
   0   2   6   50.55    1.82
  -1  -2  -6   31.35    1.54
  -1  -2  -6   32.31    1.57
  -1  -2  -6   31.72    1.39
  -1  -2  -6   28.18    1.64
   1   2   6   30.00    1.34
   1   2   6   28.78    1.50
   1   2   6   32.57    1.42
  -2  -2  -6  115.78    4.00
  -2  -2  -6  127.60    4.80
  -2  -2  -6  123.94    4.56
  -2  -2  -6  124.31    4.04
  -2  -2  -6  122.95    4.46
   2   2   6  125.97    3.78
   2   2   6  115.96    3.87
  -3  -2  -6    1.92    0.71
  -3  -2  -6    1.56    1.02
  -3  -2  -6    2.27    0.81
  -3  -2  -6    2.41    0.71
   3   2   6    2.69    0.61
  -4  -2  -6   69.97    2.73
  -4  -2  -6   65.93    3.39
  -4  -2  -6   65.55    2.66
  -5  -2  -6   55.27    2.46
  -5  -2  -6   57.12    2.52
  -5  -2  -6   53.00    3.23
  -6  -2  -6    1.49    0.93
  -6  -2  -6    1.84    0.86
  -6  -2  -6    0.60    1.31
  -7  -2  -6   10.94    1.41
  -7  -2  -6    9.62    1.28
  -7  -2  -6    8.65    1.84
  -8  -2  -6    7.32    2.03
  -8  -2  -6    9.18    1.40
  10  -3  -6   10.82    0.84
 -10   3   6   12.77    1.77
   9  -3  -6    6.12    0.67
  -9   3   6    6.65    0.80
  -9   3   6    7.60    1.45
  -9   3   6    6.86    0.78
   8  -3  -6    5.61    0.62
   8  -3  -6    7.00    0.64
  -8   3   6    6.63    0.72
  -8   3   6    7.46    0.75
  -8   3   6    5.83    1.29
   7  -3  -6   24.24    1.04
   7  -3  -6   24.15    1.08
  -7   3   6   22.15    1.19
  -7   3   6   22.89    1.94
  -7   3   6   22.53    1.15
  -7   3   6   22.91    1.14
   6  -3  -6    4.59    0.50
   6  -3  -6    4.72    0.53
  -6   3   6    3.99    0.62
  -6   3   6    3.05    0.93
  -6   3   6    4.36    0.70
  -6   3   6    4.40    0.55
   5  -3  -6   48.71    1.63
   5  -3  -6   53.54    1.75
  -5   3   6   54.38    1.73
  -5   3   6   51.75    1.79
  -5   3   6   51.33    2.52
  -5   3   6   49.20    1.98
  -5   3   6   54.55    2.04
   4  -3  -6   21.26    1.18
   4  -3  -6   22.86    0.98
  -4   3   6   22.36    1.01
  -4   3   6   19.73    1.09
  -4   3   6   22.04    1.24
  -4   3   6   24.86    1.26
  -4   3   6   19.72    1.52
   3  -3  -6   26.66    1.50
   3  -3  -6   26.52    1.27
  -3   3   6   24.07    1.18
  -3   3   6   24.14    1.28
  -3   3   6   24.96    1.30
  -3   3   6   25.27    1.11
  -3   3   6   24.81    1.63
   2  -3  -6    1.00    0.58
   2  -3  -6    2.00    0.65
  -2   3   6    0.50    0.47
  -2   3   6    2.09    0.54
  -2   3   6    2.02    0.58
  -2   3   6    0.93    0.46
  -2   3   6    1.28    0.48
   1  -3  -6   24.13    1.43
   1  -3  -6   23.55    1.35
   1  -3  -6   23.37    1.17
  -1   3   6   23.79    1.22
  -1   3   6   23.15    1.15
  -1   3   6   24.59    1.25
  -1   3   6   25.63    1.21
   0  -3  -6    0.37    0.48
   0  -3  -6    1.19    0.62
   0  -3  -6    1.13    0.60
   0   3   6    1.20    0.55
   0   3   6    0.49    0.46
   0   3   6    0.76    0.46
   0   3   6    1.04    0.46
  -1  -3  -6  147.59    4.89
  -1  -3  -6  159.86    4.60
  -1  -3  -6  149.82    5.56
   1   3   6  153.29    4.78
   1   3   6  157.62    4.59
   1   3   6  153.48    4.53
  -2  -3  -6    2.31    0.69
  -2  -3  -6    2.80    0.73
  -2  -3  -6    3.42    1.13
  -2  -3  -6    2.50    0.79
   2   3   6    3.34    0.64
  -3  -3  -6   66.66    3.30
  -3  -3  -6   69.13    2.70
  -3  -3  -6   62.61    2.58
   3   3   6   67.08    2.51
  -4  -3  -6    1.44    0.79
  -4  -3  -6    0.17    1.16
  -4  -3  -6   -0.28    0.72
  -5  -3  -6    0.52    0.82
  -5  -3  -6    0.29    1.31
  -5  -3  -6    1.36    0.89
  -6  -3  -6    0.62    1.40
  -6  -3  -6    1.32    0.95
  -6  -3  -6    0.21    0.93
  -7  -3  -6    4.35    1.22
  -7  -3  -6    5.35    1.80
  -7  -3  -6    6.17    1.17
  -8  -3  -6    0.75    1.04
  -8  -3  -6   -0.07    1.69
  -8  -3  -6   -0.46    1.06
   9  -4  -6    3.46    0.61
   9  -4  -6    4.01    0.68
  -9   4   6    3.78    1.33
   8  -4  -6   13.73    0.90
   8  -4  -6   16.46    1.01
  -8   4   6   13.40    1.70
  -8   4   6   13.42    0.99
  -8   4   6   14.90    0.94
   7  -4  -6    4.75    0.57
   7  -4  -6    5.58    0.69
  -7   4   6    6.20    0.73
  -7   4   6    7.13    0.67
  -7   4   6    5.53    1.27
  -7   4   6    6.12    0.72
   6  -4  -6   28.12    1.15
   6  -4  -6   25.66    1.31
  -6   4   6   25.14    1.90
  -6   4   6   30.05    1.26
  -6   4   6   27.68    1.46
  -6   4   6   27.95    1.31
   5  -4  -6    0.30    0.38
   5  -4  -6   -0.36    0.53
  -5   4   6    0.64    0.57
  -5   4   6   -0.24    0.79
  -5   4   6   -0.13    0.48
  -5   4   6    0.06    0.51
  -5   4   6   -0.13    0.42
   4  -4  -6   12.60    0.93
   4  -4  -6    8.74    0.66
  -4   4   6    9.98    0.89
  -4   4   6   12.14    0.89
  -4   4   6   11.13    0.75
  -4   4   6   13.65    1.30
  -4   4   6   11.50    0.90
  -3   4   6    2.40    0.59
  -3   4   6    3.73    0.61
  -3   4   6    3.19    0.61
  -3   4   6    3.32    0.86
  -2   4   6   21.04    1.30
  -2   4   6   24.31    1.25
   1  -4  -6   26.70    1.53
   1  -4  -6   25.88    1.58
  -1   4   6   24.95    1.40
  -1   4   6   25.29    1.33
  -1   4   6   27.16    1.27
   0  -4  -6  101.83    4.19
   0  -4  -6  115.67    3.80
   0  -4  -6  116.23    3.53
   0   4   6  116.20    3.68
   0   4   6  109.25    3.46
   0   4   6  107.06    3.62
  -1  -4  -6    7.30    0.99
  -1  -4  -6    7.61    0.95
   1   4   6    7.62    0.82
   1   4   6    5.77    0.76
  -2  -4  -6   47.84    2.15
   2   4   6   45.82    1.97
  -3  -4  -6   27.26    2.36
  -3  -4  -6   30.05    1.76
  -3  -4  -6   29.67    1.81
   3   4   6   30.08    1.56
  -4  -4  -6   20.69    1.59
  -4  -4  -6   22.24    1.64
  -4  -4  -6   17.44    2.10
  -5  -4  -6   71.07    2.97
  -5  -4  -6   62.68    3.91
  -5  -4  -6   66.71    2.94
  -6  -4  -6    3.52    1.70
  -6  -4  -6    5.10    1.18
  -6  -4  -6    4.86    1.14
  -7  -4  -6   26.09    2.86
  -7  -4  -6   30.10    2.00
  -7  -4  -6   26.47    2.09
  -8  -4  -6    0.09    1.04
  -8  -4  -6    0.47    1.10
  -8  -4  -6   -0.63    1.64
   9  -5  -6    6.65    0.87
  -9   5   6    7.47    1.61
   8  -5  -6    1.87    0.70
  -8   5   6    2.45    0.61
  -8   5   6    2.26    0.65
  -8   5   6    3.59    1.32
   7  -5  -6   10.81    0.97
   7  -5  -6    8.95    0.73
  -7   5   6    9.75    1.54
  -7   5   6   10.02    0.80
  -7   5   6    9.65    0.90
  -7   5   6    9.52    0.90
   6  -5  -6   12.71    1.02
   6  -5  -6   13.99    0.87
  -6   5   6   15.95    1.02
  -6   5   6   13.37    0.98
  -6   5   6   14.84    1.08
  -6   5   6   13.10    1.55
  -5   5   6    0.75    0.57
  -5   5   6    1.44    0.64
  -5   5   6    0.53    0.84
  -5   5   6    1.15    0.57
  -4   5   6  119.82    3.47
  -4   5   6  110.55    3.77
  -4   5   6  116.49    3.80
  -3   5   6    0.56    0.76
  -3   5   6    0.31    0.54
  -3   5   6    0.20    0.52
  -2   5   6  170.98    5.13
  -2   5   6  161.76    5.76
  -2   5   6  156.52    5.04
   1  -5  -6   18.40    1.29
  -1   5   6   18.06    1.27
  -1   5   6   19.43    1.28
   0  -5  -6   87.92    3.19
   0   5   6   89.32    3.11
   0   5   6   87.48    3.11
  -1  -5  -6   24.81    1.70
  -1  -5  -6   24.06    1.51
   1   5   6   24.06    1.52
  -2  -5  -6    1.26    0.76
   2   5   6    0.65    0.67
  -3  -5  -6   24.69    2.43
  -3  -5  -6   27.33    1.68
   3   5   6   26.26    1.67
  -4  -5  -6   18.93    1.56
  -4  -5  -6   17.83    2.31
  -4  -5  -6   23.92    1.78
  -5  -5  -6   11.43    2.12
  -5  -5  -6   11.76    1.44
  -5  -5  -6   14.48    1.46
  -6  -5  -6    2.29    1.07
  -6  -5  -6    3.77    1.68
  -6  -5  -6    2.22    1.08
  -7  -5  -6   -0.52    1.66
  -7  -5  -6   -0.09    1.02
  -7  -5  -6   -0.29    0.99
  -9   6   6    2.20    1.48
  -8   6   6   11.90    0.94
  -8   6   6   12.82    1.81
  -7   6   6    0.29    0.59
  -7   6   6   -0.25    0.62
  -7   6   6    1.60    1.19
  -6   6   6   46.60    2.71
  -6   6   6   49.30    1.87
  -6   6   6   47.27    2.00
  -5   6   6    1.79    0.70
  -5   6   6    2.44    0.70
  -5   6   6    1.11    0.99
  -4   6   6   37.03    1.80
  -4   6   6   33.56    1.66
  -4   6   6   30.45    1.98
  -3   6   6    9.76    0.96
  -3   6   6    8.31    1.20
  -3   6   6    7.34    0.87
  -2   6   6    3.17    0.74
  -2   6   6    3.53    0.73
  -2   6   6    2.85    0.90
   1  -6  -6    0.86    0.73
  -1   6   6    0.69    0.63
  -1   6   6    0.15    0.55
   0  -6  -6   58.55    2.54
   0   6   6   60.00    2.42
  -1  -6  -6   13.23    1.26
   1   6   6   16.00    1.26
  -2  -6  -6   40.99    2.07
   2   6   6   42.95    2.15
  -3  -6  -6    0.12    0.77
  -3  -6  -6   -0.34    1.41
   3   6   6    1.49    0.75
  -4  -6  -6    7.15    1.18
  -4  -6  -6    9.66    1.92
  -5  -6  -6    0.48    1.53
  -5  -6  -6    1.85    1.02
  -6  -6  -6   -0.28    1.00
  -6  -6  -6   -2.41    1.51
  -6  -6  -6    0.14    1.03
  -7  -6  -6    0.20    1.64
  -7  -6  -6    0.80    1.13
  -7  -6  -6   -0.31    1.11
  -8   7   6    3.04    1.45
  -7   7   6    8.96    0.97
  -7   7   6   11.37    1.71
  -6   7   6   -0.18    1.07
  -6   7   6   -0.51    0.60
  -5   7   6    5.34    0.85
  -5   7   6    4.35    0.84
  -5   7   6    3.64    1.11
  -4   7   6    6.81    0.93
  -4   7   6    8.96    1.02
  -4   7   6    8.17    1.31
  -3   7   6    1.89    0.71
  -3   7   6    1.46    0.73
  -3   7   6    2.02    0.95
  -2   7   6   28.01    1.63
  -2   7   6   25.26    1.78
  -2   7   6   26.96    1.63
  -1   7   6   26.46    1.77
  -1   7   6   26.86    1.54
  -1   7   6   27.69    1.60
   0  -7  -6    8.62    1.18
   0   7   6    7.21    1.01
   0   7   6    7.60    1.12
  -1  -7  -6   30.26    1.85
   1   7   6   34.66    1.90
  -2  -7  -6    8.39    1.23
   2   7   6    7.39    1.10
  -3  -7  -6    5.57    1.14
  -3  -7  -6    5.38    1.72
   3   7   6    6.29    1.15
  -4  -7  -6   35.08    2.17
  -4  -7  -6   27.75    2.91
  -5  -7  -6    0.21    1.60
  -5  -7  -6   -0.35    0.97
  -6  -7  -6   31.31    2.22
  -6  -7  -6   22.63    2.82
  -8   8   6    1.16    1.36
  -7   8   6    0.22    0.70
  -7   8   6   -0.34    1.20
  -6   8   6   -0.06    0.67
  -6   8   6    1.96    1.22
  -5   8   6   21.92    1.63
  -5   8   6   24.99    2.00
  -5   8   6   24.37    1.51
  -4   8   6   -0.13    0.68
  -4   8   6   -0.02    0.70
  -4   8   6    0.25    0.90
  -3   8   6   53.80    2.85
  -3   8   6   63.25    2.55
  -3   8   6   58.10    2.49
  -2   8   6    4.04    0.90
  -2   8   6    7.23    1.02
  -2   8   6    4.84    1.13
  -1   8   6   29.63    1.73
  -1   8   6   34.67    1.98
  -1   8   6   33.65    2.05
   0  -8  -6   13.80    1.49
   0   8   6   12.55    1.28
   0   8   6   16.21    1.54
  -1  -8  -6    5.22    1.15
   1   8   6    4.41    1.02
  -2  -8  -6   27.70    2.02
  -2  -8  -6   36.64    3.15
   2   8   6   35.23    2.10
  -3  -8  -6   -1.61    0.87
  -3  -8  -6   -0.34    1.53
   3   8   6   -1.12    0.91
  -4  -8  -6   19.55    1.81
  -4  -8  -6   19.98    2.61
  -5  -8  -6    3.09    1.25
  -5  -8  -6    1.56    1.73
  -7   9   6   10.49    1.72
  -7   9   6   10.10    1.05
  -6   9   6   -0.13    1.19
  -6   9   6    0.77    0.73
  -5   9   6   15.95    1.35
  -5   9   6   15.52    1.81
  -5   9   6   17.94    1.50
  -4   9   6    1.87    0.84
  -4   9   6    0.81    0.81
  -4   9   6   -1.26    0.88
  -3   9   6    8.78    1.36
  -3   9   6    7.10    1.09
  -3   9   6    7.36    1.06
  -2   9   6   -0.33    0.79
  -2   9   6    1.20    1.00
  -2   9   6    0.90    0.83
  -1   9   6    3.84    0.97
  -1   9   6    3.16    1.05
   0   9   6    3.20    0.99
  -1  -9  -6   22.51    1.93
   1   9   6   20.22    1.67
  -2  -9  -6   -0.87    0.99
  -2  -9  -6   -0.12    1.53
   2   9   6    0.47    0.88
  -3  -9  -6   10.29    2.20
  -3  -9  -6    7.95    1.43
   3   9   6   13.83    1.60
  -4  -9  -6   -0.04    1.63
  -4  -9  -6   -1.91    1.05
  -5  -9  -6    2.13    1.80
  -6  10   6    1.06    1.23
  -6  10   6    1.44    0.82
  -5  10   6   -0.16    0.85
  -5  10   6    0.21    0.79
  -5  10   6    2.12    1.19
  -4  10   6    0.01    0.84
  -4  10   6    0.60    0.86
  -4  10   6   -0.55    1.08
  -3  10   6    7.02    1.15
  -3  10   6    4.64    1.24
  -3  10   6    6.49    1.14
  -2  10   6    0.27    0.84
  -2  10   6    3.46    1.03
  -1  10   6    9.81    1.29
   0  10   6    7.13    1.21
   1  10   6    1.31    0.94
  -2 -10  -6    4.63    1.87
  -2 -10  -6    6.52    1.41
   2  10   6    4.91    1.28
  -3 -10  -6    9.80    2.16
  -3 -10  -6    5.24    1.37
  -4  11   6   12.52    1.47
  -4  11   6   11.11    1.60
  -4  11   6   13.97    1.42
  -3  11   6   -0.92    0.91
  -3  11   6   -0.38    0.87
  -2  11   6   16.15    1.55
  -1  11   6    5.04    1.15
   0  11   6    7.32    1.28
   1  11   6   13.93    1.65
  -2 -11  -6    2.05    1.77
   2  11   6   -0.96    1.08
   2  13  -7   10.66    1.56
   1  13  -7    8.12    1.45
   0  13  -7    2.80    1.22
  -1  13  -7   17.86    1.75
  -2  13  -7   -0.19    0.98
  -4 -12   7    7.27    1.38
   3  12  -7    3.27    1.25
  -3 -12   7    1.59    1.11
   2  12  -7   -0.43    1.08
  -2 -12   7   -1.07    0.93
   1  12  -7   11.59    2.32
   1  12  -7   13.55    1.61
   0  12  -7   10.11    1.47
   0  12  -7    9.85    2.15
  -1  12  -7    2.31    1.69
  -1  12  -7    1.46    1.05
  -2  12  -7   11.73    1.44
  -2  12  -7   12.79    1.53
  -3  12  -7    1.93    1.03
  -3  12  -7    2.08    1.09
  -4  12  -7    3.01    1.11
  -4  12  -7    2.49    1.06
  -4  12  -7    0.71    1.55
  -5 -11   7    0.11    1.02
  -4 -11   7   10.83    1.48
   3  11  -7    0.10    1.06
  -3 -11   7   -0.09    0.95
   2  11  -7   15.05    1.65
  -2 -11   7   19.39    1.66
   1  11  -7    1.32    0.96
   0  11  -7    7.66    1.29
   0  11  -7   10.55    2.16
  -1  11  -7    0.26    0.96
  -1  11  -7    3.11    1.67
  -2  11  -7    2.09    1.52
  -2  11  -7    0.39    0.93
  -2  11  -7    0.66    0.93
  -3  11  -7    0.06    0.96
  -3  11  -7    0.51    1.61
  -3  11  -7   -0.39    0.91
  -4  11  -7   21.96    1.80
  -4  11  -7   21.27    1.70
  -5  11  -7    0.87    0.98
  -5  11  -7   -1.33    1.32
  -5  11  -7    0.33    0.87
  -6 -10   7    1.34    1.06
  -5 -10   7   10.75    1.48
  -4 -10   7    0.89    0.90
   3  10  -7   32.46    2.15
  -3 -10   7   28.91    1.82
   2  10  -7    8.25    1.27
  -2 -10   7    8.26    1.15
   1  10  -7   18.57    1.66
  -1 -10   7   19.87    1.57
   0  10  -7   57.10    2.63
   0  10  -7   60.04    3.99
  -1  10  -7    7.46    1.15
  -1  10  -7    5.20    1.12
  -1  10  -7    7.93    1.91
  -2  10  -7   44.76    2.23
  -2  10  -7   46.74    3.52
  -2  10  -7   44.40    2.33
  -3  10  -7    3.86    1.62
  -3  10  -7    2.86    0.97
  -3  10  -7    1.04    0.89
  -4  10  -7   10.53    2.13
  -4  10  -7   11.09    1.28
  -4  10  -7    9.92    1.90
  -4  10  -7   14.15    1.41
  -5  10  -7    0.79    1.28
  -5  10  -7    0.12    0.91
  -5  10  -7    0.09    0.80
  -6  10  -7   -0.63    1.41
  -6  10  -7   -0.06    0.81
  -7  -9   7   21.72    1.87
  -6  -9   7    2.65    1.00
  -5  -9   7   24.72    1.71
  -4  -9   7   10.65    1.31
   3   9  -7    2.04    0.90
  -3  -9   7    2.04    0.90
   2   9  -7   16.39    1.47
  -2  -9   7   19.98    1.52
   1   9  -7    9.82    1.19
  -1  -9   7   11.19    1.23
   0   9  -7    7.18    1.07
   0  -9   7   10.73    1.11
  -1   9  -7   17.44    2.26
  -1   9  -7   22.83    1.65
  -1   9  -7   16.85    1.48
  -2   9  -7   -0.34    0.76
  -2   9  -7    0.85    0.82
  -2   9  -7    1.34    1.51
  -3   9  -7    1.58    1.53
  -3   9  -7    1.87    0.85
  -3   9  -7    1.47    0.88
  -4   9  -7    9.21    2.06
  -4   9  -7   11.03    1.21
  -4   9  -7   12.82    1.35
  -4   9  -7   10.07    1.74
  -5   9  -7   -0.27    1.41
  -5   9  -7   -0.32    0.85
  -5   9  -7    0.17    1.27
  -5   9  -7    1.31    0.84
  -6   9  -7   16.78    2.27
  -6   9  -7   12.97    1.26
  -7   9  -7    0.55    0.75
  -8  -8   7    1.90    1.04
  -8  -8   7    2.18    1.06
  -7  -8   7    1.16    1.01
  -7  -8   7   -0.07    0.89
  -6  -8   7    0.29    0.91
  -6  -8   7    0.09    0.79
  -5  -8   7   18.90    1.58
  -4  -8   7    0.83    0.75
   3   8  -7   43.45    2.22
  -3  -8   7   42.73    2.10
   2   8  -7    1.25    0.81
  -2  -8   7    0.18    0.66
   1   8  -7   38.49    2.01
  -1  -8   7   36.98    1.85
   0   8  -7    1.34    0.73
   0  -8   7    1.53    0.70
  -1   8  -7    0.43    1.32
  -1   8  -7    1.76    0.81
  -2   8  -7    2.58    0.85
  -2   8  -7    3.54    0.87
  -2   8  -7    2.06    1.42
  -3   8  -7   23.37    2.58
  -3   8  -7   28.58    1.68
  -3   8  -7   26.77    1.69
  -4   8  -7    2.56    1.45
  -4   8  -7    2.66    0.85
  -4   8  -7    1.58    0.87
  -4   8  -7    1.83    1.26
  -5   8  -7   35.68    1.93
  -5   8  -7   28.42    2.98
  -5   8  -7   30.98    2.57
  -5   8  -7   34.98    1.83
  -6   8  -7    0.35    1.25
  -6   8  -7   -0.13    1.39
  -6   8  -7    0.62    0.78
  -7   8  -7   12.08    1.12
  -7   8  -7   13.34    2.15
  -8  -7   7   -0.31    0.84
  -8  -7   7    1.34    0.97
  -7  -7   7    3.01    0.94
  -7  -7   7    3.10    1.01
  -6  -7   7   12.00    1.35
  -6  -7   7   13.15    1.39
  -5  -7   7    9.82    1.16
  -5  -7   7   10.24    1.24
  -4  -7   7   69.62    2.85
  -4  -7   7   77.66    2.96
   3   7  -7   -0.60    0.67
  -3  -7   7   -0.24    0.62
   2   7  -7   42.23    1.98
  -2  -7   7   41.63    1.94
   1   7  -7   72.65    2.81
  -1  -7   7   73.99    2.79
   0   7  -7    8.52    1.02
   0   7  -7    7.49    0.98
   0  -7   7    7.35    0.88
  -1   7  -7  117.74    5.38
  -1   7  -7  105.76    3.88
  -1   7  -7  114.39    3.88
  -2   7  -7    2.49    0.84
  -2   7  -7    1.26    1.32
  -2   7  -7    2.84    0.78
  -3   7  -7   90.33    3.33
  -3   7  -7   82.28    4.59
  -3   7  -7   94.89    3.33
  -4   7  -7    0.29    0.71
  -4   7  -7    1.38    1.12
  -4   7  -7    0.58    0.78
  -4   7  -7   -1.21    1.09
  -5   7  -7   28.66    2.87
  -5   7  -7   32.02    1.84
  -5   7  -7   29.83    1.69
  -5   7  -7   27.82    2.52
  -6   7  -7    4.40    1.55
  -6   7  -7    5.14    0.90
  -6   7  -7    4.95    1.71
  -7   7  -7    0.68    0.71
  -7   7  -7    0.14    1.45
  -9  -6   7   -0.12    0.84
  -9  -6   7   -0.40    0.82
  -8  -6   7   28.47    1.87
  -8  -6   7   30.29    1.81
  -7  -6   7    0.75    0.80
  -7  -6   7   -0.72    0.75
  -6  -6   7   63.03    2.78
  -6  -6   7   69.70    2.82
  -5  -6   7    9.54    1.09
  -5  -6   7   11.67    1.21
  -4  -6   7   42.24    2.01
  -4  -6   7   38.56    1.90
   3   6  -7   39.59    1.92
  -3  -6   7   42.06    1.89
  -3  -6   7   42.69    1.99
   2   6  -7    0.06    0.69
   2   6  -7    1.17    0.67
  -2  -6   7    0.93    0.59
  -2  -6   7    0.03    0.63
   1   6  -7   83.85    3.47
   1   6  -7   83.81    3.08
  -1  -6   7   84.17    2.96
  -1  -6   7   85.86    3.48
   0   6  -7   47.24    2.12
   0   6  -7   56.16    2.19
   0  -6   7   48.30    2.05
  -1   6  -7   32.95    1.68
  -1   6  -7   36.04    2.62
  -1   6  -7   32.91    1.76
   1  -6   7   34.94    1.62
  -2   6  -7   36.02    1.84
  -2   6  -7   39.51    2.89
  -2   6  -7   37.67    1.81
  -3   6  -7   10.60    1.45
  -3   6  -7   11.92    1.81
  -3   6  -7   11.66    1.15
  -3   6  -7   12.36    1.14
  -4   6  -7    2.56    1.27
  -4   6  -7    1.99    1.15
  -4   6  -7    1.55    0.79
  -4   6  -7    1.34    0.74
  -5   6  -7   29.79    1.71
  -5   6  -7   23.95    1.51
  -5   6  -7   25.17    2.59
  -5   6  -7   28.13    2.40
  -6   6  -7    0.49    0.73
  -6   6  -7    1.21    1.33
  -6   6  -7    0.05    0.78
  -6   6  -7    2.01    1.50
  -7   6  -7    6.51    0.94
  -7   6  -7    8.43    2.00
  -7   6  -7   14.02    2.07
  -8   6  -7    0.28    1.50
  -8   6  -7    2.77    0.71
  -9  -5   7    2.59    0.86
  -9  -5   7    2.33    0.91
  -8  -5   7    8.14    1.12
  -8  -5   7    8.34    1.12
  -7  -5   7    0.46    0.78
  -7  -5   7    1.83    0.81
  -6  -5   7    1.35    0.79
  -6  -5   7    1.95    0.79
  -5  -5   7    1.82    0.73
  -5  -5   7    1.73    0.71
  -4  -5   7   48.46    2.07
  -4  -5   7   45.05    2.05
   3   5  -7    2.63    0.69
  -3  -5   7    3.04    0.66
  -3  -5   7    2.70    0.67
   2   5  -7  125.21    3.77
   2   5  -7  119.42    3.96
   2   5  -7  118.32    4.53
  -2  -5   7  124.61    4.00
  -2  -5   7  116.00    3.92
  -2  -5   7  115.18    4.46
  -2  -5   7  120.58    3.73
   1   5  -7    1.63    0.56
   1   5  -7    1.83    0.67
   1   5  -7    0.89    0.65
  -1  -5   7    1.15    0.57
  -1  -5   7    1.24    0.63
  -1  -5   7    1.21    0.51
   0   5  -7   29.50    1.64
   0   5  -7   27.36    1.60
   0   5  -7   29.93    1.69
   0  -5   7   30.37    1.45
   0  -5   7   32.01    1.70
  -1   5  -7    7.83    0.90
  -1   5  -7    5.58    1.29
  -1   5  -7    5.88    0.85
   1  -5   7    7.03    0.78
  -2   5  -7    9.09    0.94
  -2   5  -7    8.79    1.03
  -2   5  -7    7.72    1.42
  -3   5  -7    7.03    0.94
  -3   5  -7    5.08    1.31
  -3   5  -7    6.31    1.13
  -3   5  -7    5.39    0.81
  -4   5  -7   57.30    3.02
  -4   5  -7   58.42    2.41
  -4   5  -7   57.68    3.50
  -4   5  -7   57.95    2.41
  -5   5  -7    1.75    1.19
  -5   5  -7    1.84    0.72
  -5   5  -7    0.69    1.26
  -5   5  -7    2.19    0.84
  -6   5  -7   36.45    2.76
  -6   5  -7   27.50    2.78
  -6   5  -7   28.11    1.69
  -6   5  -7   36.15    1.87
  -7   5  -7    8.48    1.03
  -7   5  -7    9.25    1.86
  -7   5  -7    8.50    1.95
  -8   5  -7    2.93    0.76
  -8   5  -7    1.75    1.56
  -9  -4   7    1.24    0.77
  -8  -4   7    3.06    0.81
  -8  -4   7    1.29    0.83
  -7  -4   7    0.70    0.76
  -7  -4   7    0.20    0.69
  -6  -4   7   26.58    1.60
  -6  -4   7   27.06    1.56
  -5  -4   7   20.24    1.39
  -5  -4   7   22.19    1.38
  -4  -4   7   13.63    1.08
  -4  -4   7   13.39    1.06
   3   4  -7   33.11    1.64
  -3  -4   7   34.57    1.61
  -3  -4   7   36.86    1.64
   2   4  -7   63.17    2.73
   2   4  -7   63.65    2.23
   2   4  -7   63.08    2.36
  -2  -4   7   64.18    2.65
  -2  -4   7   60.64    2.29
  -2  -4   7   59.81    2.36
  -2  -4   7   61.02    2.19
   1   4  -7   33.48    1.45
   1   4  -7   29.12    1.55
   1   4  -7   31.78    1.71
  -1  -4   7   31.75    1.69
  -1  -4   7   33.89    1.42
  -1  -4   7   32.93    1.50
   0   4  -7  267.27    7.25
   0   4  -7  269.95    7.75
   0   4  -7  253.28    7.68
   0   4  -7  246.88    8.70
   0  -4   7  249.44    8.73
   0  -4   7  265.08    7.59
   0  -4   7  254.54    7.17
  -1   4  -7   25.14    1.50
  -1   4  -7   25.77    1.42
  -1   4  -7   26.06    2.13
  -1   4  -7   26.25    1.46
   1  -4   7   26.70    1.53
   1  -4   7   21.59    1.43
   1  -4   7   24.61    1.26
  -2   4  -7  238.76    8.24
  -2   4  -7  244.20    7.26
  -2   4  -7  236.76    7.23
  -2   4  -7  233.00    9.06
  -3   4  -7    8.09    1.32
  -3   4  -7    9.66    1.01
  -3   4  -7    9.55    1.01
  -3   4  -7    9.66    1.23
  -4   4  -7   43.67    2.51
  -4   4  -7   41.29    2.03
  -4   4  -7   41.79    2.86
  -4   4  -7   45.08    2.13
  -5   4  -7   10.69    1.75
  -5   4  -7   12.24    1.23
  -5   4  -7    8.57    1.08
  -5   4  -7   11.84    1.63
  -5   4  -7   13.92    1.47
  -6   4  -7    0.32    0.71
  -6   4  -7   -1.19    0.77
[truncated: 135,665 more chars]
