# Supplementary material
Source: MDPI journal article supplement (https://www.mdpi.com/2304-6740/7/10/122)
Supplement: s1 [file s1 › NiH10As4O16.cif]

data_global       

_publ_contact_author_name
  
;       
Matthias Weil       
;       
  
_publ_contact_author_address  
  
;  
Institute for Chemical Technologies and Analytics
Division of Structural Chemistry
TU Wien
Getreidemarkt 9/164-SC
A-1060 Vienna
Austria       
;  
  
_publ_contact_author_phone      '+43 1 58801 17122'
_publ_contact_author_fax        '+43 1 58801 17199'  
_publ_contact_author_email      'matthias.weil@tuwien.ac.at'
_publ_contact_letter
;
Please consider this CIF submission as supporting information
for Inorganic Chemistry.
;
_publ_requested_journal
;
data deposition
;
_publ_requested_category
;
;
_publ_requested_coeditor_name   ?
_journal_date_recd_electronic      ?
_journal_date_to_coeditor       ?
_journal_date_from_coeditor     ?       
_journal_date_accepted     ?
_journal_date_printers_first    ?       
_journal_date_printers_final    ?       
_journal_date_proofs_out        ?       
_journal_date_proofs_in ?       
_journal_coeditor_name  ?       
_journal_coeditor_code     ?
_journal_paper_category      ?
_journal_coeditor_notes   ?       
_journal_techeditor_code      ?
_iucr_compatibility_tag          ?
_journal_techeditor_notes ?       
_journal_coden_ASTM     ?       
_journal_name_full      ?       
_journal_year   ?       
_journal_volume ?       
_journal_issue  ?       
_journal_page_first     ?       
_journal_page_last      ?       
_journal_suppl_publ_number      ?       
_journal_suppl_publ_pages       ?       
  
_publ_section_title             
;   
data deposition
;
loop_       
  
 _publ_author_name       
 _publ_author_address       

'Weil, Matthias'
;  
Institute for Chemical Technologies and Analytics
Division of Structural Chemistry
TU Wien
Getreidemarkt 9/164-SC
A-1060 Vienna
Austria       
; 

_publ_section_abstract
;
;
_publ_section_comment
;
;
_publ_section_exptl_prep
;
;

_publ_section_exptl_refinement
;
;

_publ_section_references
;


;
_publ_section_acknowledgements
;
;

_publ_section_figure_captions
;
;
 
data_NiAs4H10O16
 
_audit_creation_method            'SHELXL-2018/3'
_shelx_SHELXL_version_number      '2018/3'
_chemical_name_systematic         ?
_chemical_name_common             ?
_chemical_melting_point           ?
_chemical_formula_moiety          'As4 H10 Ni O16'
_chemical_formula_sum
 'As4 H10 Ni O16' 
_chemical_formula_weight          624.47

loop_
 _atom_type_symbol
 _atom_type_description
 _atom_type_scat_dispersion_real
 _atom_type_scat_dispersion_imag
 _atom_type_scat_source
 'O'  'O'   0.0106   0.0060
 'International Tables Vol C Tables 4.2.6.8 and 6.1.1.4'
 'H'  'H'   0.0000   0.0000
 'International Tables Vol C Tables 4.2.6.8 and 6.1.1.4'
 'Ni'  'Ni'   0.3393   1.1124
 'International Tables Vol C Tables 4.2.6.8 and 6.1.1.4'
 'As'  'As'   0.0499   2.0058
 'International Tables Vol C Tables 4.2.6.8 and 6.1.1.4'
 
_space_group_crystal_system       triclinic
_space_group_IT_number            2
_space_group_name_H-M_alt         'P -1'
_space_group_name_Hall            '-P 1'
 
_shelx_space_group_comment
;
The symmetry employed for this shelxl refinement is uniquely defined
by the following loop, which should always be used as a source of
symmetry information in preference to the above space-group names.
They are only intended as comments.
;
 
loop_
 _space_group_symop_operation_xyz
 'x, y, z'
 '-x, -y, -z'
 
_cell_length_a                    5.4297(7)
_cell_length_b                    7.3308(9)
_cell_length_c                    8.2795(10)
_cell_angle_alpha                 100.356(5)
_cell_angle_beta                  98.088(5)
_cell_angle_gamma                 92.982(5)
_cell_volume                      319.95(7)
_cell_formula_units_Z             1
_cell_measurement_temperature     100(2)
_cell_measurement_reflns_used     5281
_cell_measurement_theta_min       2.508
_cell_measurement_theta_max       33.981
 
_exptl_crystal_description        plate
_exptl_crystal_colour             yellow
_exptl_crystal_density_meas       ?
_exptl_crystal_density_method     ?
_exptl_crystal_density_diffrn     3.241          
_exptl_crystal_F_000              298
_exptl_transmission_factor_min    ?
_exptl_transmission_factor_max    ?
_exptl_crystal_size_max           0.09
_exptl_crystal_size_mid           0.06
_exptl_crystal_size_min           0.04
_exptl_absorpt_coefficient_mu     11.869
_shelx_estimated_absorpt_T_min    ?
_shelx_estimated_absorpt_T_max    ?
_exptl_absorpt_correction_type    'multi-scan'
_exptl_absorpt_correction_T_min   0.256925  
_exptl_absorpt_correction_T_max   0.438654
_exptl_absorpt_process_details    'TWINABS'
_exptl_absorpt_special_details    ?
_diffrn_ambient_temperature       100(2)
_diffrn_radiation_wavelength      0.71073
_diffrn_radiation_type            MoK\a
_diffrn_source                    ?
_diffrn_measurement_device_type   'Bruker APEX-II CCD'
_diffrn_measurement_method        '\w- and \f-scans'
_diffrn_detector_area_resol_mean  ?
_diffrn_reflns_number             3000
_diffrn_reflns_av_unetI/netI      0.0561
_diffrn_reflns_av_R_equivalents   ?
_diffrn_reflns_limit_h_min        -9
_diffrn_reflns_limit_h_max        8
_diffrn_reflns_limit_k_min        -12
_diffrn_reflns_limit_k_max        12
_diffrn_reflns_limit_l_min        0
_diffrn_reflns_limit_l_max        13
_diffrn_reflns_theta_min          2.530
_diffrn_reflns_theta_max          36.705
_diffrn_reflns_theta_full         25.242
_diffrn_measured_fraction_theta_max   0.940
_diffrn_measured_fraction_theta_full  1.000
_diffrn_reflns_Laue_measured_fraction_max    0.940
_diffrn_reflns_Laue_measured_fraction_full   1.000
_diffrn_reflns_point_group_measured_fraction_max   0.940
_diffrn_reflns_point_group_measured_fraction_full  1.000
_reflns_number_total              3000
_reflns_number_gt                 2566
_reflns_threshold_expression      'I > 2\s(I)'
_reflns_Friedel_coverage          0.000
_reflns_Friedel_fraction_max      .
_reflns_Friedel_fraction_full     .
 
_reflns_special_details
;
 _reflns_Friedel_fraction is defined as the number of unique
 Friedel pairs measured divided by the number that would be
 possible theoretically, ignoring centric projections and
 systematic absences. Completness statistics refer to single and
 composite reflections containing twin component 1 only.
;
 
_computing_data_collection        'APEX-II (Bruker, 2012)'
_computing_cell_refinement        'SAINT (Bruker, 2012)'
_computing_data_reduction         'SAINT (Bruker, 2012)'
_computing_structure_solution     'isomorphic replacement'
_computing_structure_refinement 'SHELXL-2018/3 (Sheldrick, 2018)'
_computing_molecular_graphics     ?
_computing_publication_material   ?
_refine_special_details
;
 Refined as a 2-component twin.
;
_refine_ls_structure_factor_coef  Fsqd
_refine_ls_matrix_type            full
_refine_ls_weighting_scheme       calc
_refine_ls_weighting_details
'w=1/[\s^2^(Fo^2^)+(0.0457P)^2^+0.0999P] where P=(Fo^2^+2Fc^2^)/3'
_atom_sites_solution_primary      ?
_atom_sites_solution_secondary    ?
_atom_sites_solution_hydrogens    difmap
_refine_ls_hydrogen_treatment     refall
_refine_ls_extinction_method      none
_refine_ls_extinction_coef        .
_refine_ls_number_reflns          3000
_refine_ls_number_parameters      114
_refine_ls_number_restraints      5
_refine_ls_R_factor_all           0.0537
_refine_ls_R_factor_gt            0.0387
_refine_ls_wR_factor_ref          0.0880
_refine_ls_wR_factor_gt           0.0822
_refine_ls_goodness_of_fit_ref    1.082
_refine_ls_restrained_S_all       1.081
_refine_ls_shift/su_max           0.000
_refine_ls_shift/su_mean          0.000
 
loop_
 _atom_site_label
 _atom_site_type_symbol
 _atom_site_fract_x
 _atom_site_fract_y
 _atom_site_fract_z
 _atom_site_U_iso_or_equiv
 _atom_site_adp_type
 _atom_site_occupancy
 _atom_site_site_symmetry_order  
 _atom_site_calc_flag
 _atom_site_refinement_flags_posn
 _atom_site_refinement_flags_adp
 _atom_site_refinement_flags_occupancy
 _atom_site_disorder_assembly
 _atom_site_disorder_group
As1 As 0.04209(7) 0.32144(6) 0.74847(5) 0.00759(9) Uani 1 1 d . . . . .
As2 As 0.42430(7) 0.83022(5) 0.77973(5) 0.00650(8) Uani 1 1 d . . . . .
Ni1 Ni 0.000000 0.000000 0.000000 0.00863(13) Uani 1 2 d S . P . .
O1 O 0.8819(6) 0.5094(4) 0.7246(4) 0.0125(6) Uani 1 1 d D . . . .
O2 O 0.0956(6) 0.2281(4) 0.5528(4) 0.0141(6) Uani 1 1 d D . . . .
O3 O 0.8844(6) 0.1685(4) 0.8252(4) 0.0121(5) Uani 1 1 d . . . . .
O4 O 0.3159(6) 0.4042(4) 0.8717(4) 0.0127(6) Uani 1 1 d D . . . .
O5 O 0.6561(5) 0.8413(4) 0.9352(3) 0.0088(5) Uani 1 1 d . . . . .
O6 O 0.4315(6) 0.6424(4) 0.6243(4) 0.0126(6) Uani 1 1 d D . . . .
O7 O 0.1367(5) 0.8155(4) 0.8264(4) 0.0093(5) Uani 1 1 d . . . . .
O8 O 0.4522(5) 1.0204(4) 0.6880(4) 0.0109(5) Uani 1 1 d D . . . .
H1 H 0.213(9) 0.148(7) 0.565(8) 0.022(8) Uiso 1 1 d D U . . .
H2 H 0.981(10) 0.612(5) 0.772(7) 0.022(8) Uiso 1 1 d D U . . .
H3 H 0.348(13) 0.343(8) 0.956(5) 0.022(8) Uiso 1 1 d D U . . .
H4 H 0.575(7) 0.587(9) 0.630(8) 0.022(8) Uiso 1 1 d D U . . .
H5 H 0.598(6) 1.077(8) 0.744(7) 0.022(8) Uiso 1 1 d D U . . .
 
loop_
 _atom_site_aniso_label
 _atom_site_aniso_U_11
 _atom_site_aniso_U_22
 _atom_site_aniso_U_33
 _atom_site_aniso_U_23
 _atom_site_aniso_U_13
 _atom_site_aniso_U_12
As1 0.00739(16) 0.00616(17) 0.00906(17) 0.00259(13) -0.00038(13) -0.00042(12)
As2 0.00628(16) 0.00617(16) 0.00713(16) 0.00163(13) 0.00044(13) 0.00144(12)
Ni1 0.0082(3) 0.0081(3) 0.0099(3) 0.0023(2) 0.0015(2) 0.0010(2)
O1 0.0077(12) 0.0084(13) 0.0209(15) 0.0035(11) -0.0007(11) 0.0015(10)
O2 0.0168(14) 0.0142(14) 0.0104(13) -0.0003(11) 0.0002(11) 0.0072(12)
O3 0.0113(12) 0.0104(13) 0.0141(13) 0.0056(10) -0.0023(10) -0.0038(10)
O4 0.0115(13) 0.0097(13) 0.0155(14) 0.0050(11) -0.0047(11) -0.0019(10)
O5 0.0076(12) 0.0104(13) 0.0084(12) 0.0023(10) -0.0004(9) 0.0021(10)
O6 0.0134(13) 0.0110(13) 0.0113(13) -0.0037(10) 0.0004(10) 0.0058(11)
O7 0.0072(12) 0.0078(13) 0.0118(12) -0.0017(10) 0.0028(9) -0.0006(9)
O8 0.0094(12) 0.0103(13) 0.0143(13) 0.0072(10) 0.0011(10) -0.0019(10)
 
_geom_special_details
;
 All esds (except the esd in the dihedral angle between two l.s. planes)
 are estimated using the full covariance matrix.  The cell esds are taken
 into account individually in the estimation of esds in distances, angles
 and torsion angles; correlations between esds in cell parameters are only
 used when they are defined by crystal symmetry.  An approximate (isotropic)
 treatment of cell esds is used for estimating esds involving l.s. planes.
;
 
loop_
 _geom_bond_atom_site_label_1
 _geom_bond_atom_site_label_2
 _geom_bond_distance
 _geom_bond_site_symmetry_2
 _geom_bond_publ_flag
As1 O3 1.644(3) 1_455 ?
As1 O1 1.694(3) 1_455 ?
As1 O4 1.696(3) . ?
As1 O2 1.712(3) . ?
As1 Ni1 3.4328(5) 1_556 ?
As2 O5 1.656(3) . ?
As2 O7 1.664(3) . ?
As2 O8 1.713(3) . ?
As2 O6 1.713(3) . ?
As2 Ni1 3.2935(5) 1_566 ?
As2 Ni1 3.4382(5) 1_666 ?
Ni1 O7 2.037(3) 2_566 ?
Ni1 O7 2.037(3) 1_544 ?
Ni1 O5 2.097(3) 2_666 ?
Ni1 O5 2.097(3) 1_444 ?
Ni1 O3 2.117(3) 2_656 ?
Ni1 O3 2.117(3) 1_454 ?
O1 H2 0.898(10) . ?
O2 H1 0.897(10) . ?
O4 H3 0.899(10) . ?
O6 H4 0.897(10) . ?
O8 H5 0.900(10) . ?
 
loop_
 _geom_angle_atom_site_label_1
 _geom_angle_atom_site_label_2
 _geom_angle_atom_site_label_3
 _geom_angle
 _geom_angle_site_symmetry_1
 _geom_angle_site_symmetry_3
 _geom_angle_publ_flag
O3 As1 O1 112.33(16) 1_455 1_455 ?
O3 As1 O4 112.45(15) 1_455 . ?
O1 As1 O4 106.23(15) 1_455 . ?
O3 As1 O2 110.69(16) 1_455 . ?
O1 As1 O2 104.80(16) 1_455 . ?
O4 As1 O2 109.99(16) . . ?
O3 As1 Ni1 27.58(10) 1_455 1_556 ?
O1 As1 Ni1 132.13(12) 1_455 1_556 ?
O4 As1 Ni1 86.58(11) . 1_556 ?
O2 As1 Ni1 113.76(11) . 1_556 ?
O5 As2 O7 116.51(15) . . ?
O5 As2 O8 110.00(15) . . ?
O7 As2 O8 107.42(15) . . ?
O5 As2 O6 112.17(14) . . ?
O7 As2 O6 104.96(15) . . ?
O8 As2 O6 105.03(16) . . ?
O5 As2 Ni1 97.84(10) . 1_566 ?
O7 As2 Ni1 30.27(10) . 1_566 ?
O8 As2 Ni1 94.21(11) . 1_566 ?
O6 As2 Ni1 135.22(11) . 1_566 ?
O5 As2 Ni1 26.77(10) . 1_666 ?
O7 As2 Ni1 134.55(10) . 1_666 ?
O8 As2 Ni1 84.20(10) . 1_666 ?
O6 As2 Ni1 114.28(11) . 1_666 ?
Ni1 As2 Ni1 107.508(14) 1_566 1_666 ?
O7 Ni1 O7 180.00(13) 2_566 1_544 ?
O7 Ni1 O5 88.38(11) 2_566 2_666 ?
O7 Ni1 O5 91.62(11) 1_544 2_666 ?
O7 Ni1 O5 91.62(11) 2_566 1_444 ?
O7 Ni1 O5 88.38(11) 1_544 1_444 ?
O5 Ni1 O5 180.0(2) 2_666 1_444 ?
O7 Ni1 O3 92.09(13) 2_566 2_656 ?
O7 Ni1 O3 87.91(13) 1_544 2_656 ?
O5 Ni1 O3 90.23(11) 2_666 2_656 ?
O5 Ni1 O3 89.77(11) 1_444 2_656 ?
O7 Ni1 O3 87.91(13) 2_566 1_454 ?
O7 Ni1 O3 92.09(13) 1_544 1_454 ?
O5 Ni1 O3 89.77(11) 2_666 1_454 ?
O5 Ni1 O3 90.23(11) 1_444 1_454 ?
O3 Ni1 O3 180.00(12) 2_656 1_454 ?
As1 O1 H2 109(4) 1_655 . ?
As1 O2 H1 107(4) . . ?
As1 O3 Ni1 131.35(17) 1_655 1_656 ?
As1 O4 H3 112(4) . . ?
As2 O5 Ni1 132.39(17) . 1_666 ?
As2 O6 H4 115(4) . . ?
As2 O7 Ni1 125.42(15) . 1_566 ?
As2 O8 H5 101(4) . . ?
 
loop_
 _geom_hbond_atom_site_label_D 
 _geom_hbond_atom_site_label_H 
 _geom_hbond_atom_site_label_A 
 _geom_hbond_distance_DH 
 _geom_hbond_distance_HA 
 _geom_hbond_distance_DA 
 _geom_hbond_angle_DHA 
 _geom_hbond_site_symmetry_A 
 _geom_hbond_publ_flag
O2 H1 O8  0.897(10) 1.92(3) 2.762(4) 155(6) 1_545 yes
O1 H2 O7  0.898(10) 1.629(17) 2.516(4) 169(6) 1_655 yes
O4 H3 O5  0.899(10) 1.75(3) 2.610(4) 159(6) 2_667 yes
O6 H4 O1  0.897(10) 1.90(2) 2.755(4) 159(6) . yes
O6 H4 O6  0.897(10) 2.44(6) 2.863(6) 109(4) 2_666 yes
O8 H5 O3  0.900(10) 1.658(14) 2.553(4) 172(7) 1_565 yes
 
_refine_diff_density_max    1.338
_refine_diff_density_min   -1.685
_refine_diff_density_rms    0.334

_shelx_res_file
;

TITL test_a.res in P-1
    isotypic.res
    created by SHELXL-2018/3 at 15:39:53 on 13-Jul-2019
CELL 0.71073   5.42970   7.33080   8.27950 100.3563  98.0884  92.9816
ZERR    1.00   0.00070   0.00090   0.00100   0.0045   0.0048   0.0048
LATT 1
SFAC O  H  Ni As
UNIT 16  10  1  4
rem Atomkoordinaten wie in der isotypen Cu-Verbindung
rem auch Zn-Verbindung publiziert
rem check H-Atom Positions
rem X-tal erhalten durch Behandeln von NiCO3.Ni(OH)2 mit H3AsO4, bis sich nichts
rem mehr geloset hat. Gruenes Filtrat langsam Eindunsten lassen.
rem liefert gelbe Kristalle
rem gelbes Plaettchen 0.09 0.06 0.04
rem
L.S. 10
BOND $H
FMAP 2
htab
PLAN 20
TEMP -173
conn 6 2.5 NI1
dfix 0.90 0.01 O1 H2
dfix 0.90 0.01 O6 H4
dfix 0.90 0.01 O2 H1
dfix 0.90 0.01 O4 H3
dfix 0.90 0.01 O8 H5
EQIV $15 x, y-1, z
HTAB O2 O8_$15
EQIV $2 x+1, y, z
HTAB O1 O7_$2
EQIV $16 -x+1, -y+1, -z+2
HTAB O4 O5_$16
HTAB O6 O1
EQIV $7 -x+1, -y+1, -z+1
HTAB O6 O6_$7
EQIV $17 x, y+1, z
HTAB O8 O3_$17
acta
WGHT    0.045700    0.099900
BASF   0.42671
FVAR       0.90020   0.02227
AS1   4    0.042087    0.321440    0.748467    11.00000    0.00739    0.00616 =
         0.00906    0.00259   -0.00038   -0.00042
AS2   4    0.424300    0.830219    0.779730    11.00000    0.00628    0.00617 =
         0.00713    0.00163    0.00044    0.00144
NI1   3    0.000000    0.000000    0.000000    10.50000    0.00820    0.00807 =
         0.00991    0.00231    0.00152    0.00095
O1    1    0.881891    0.509395    0.724643    11.00000    0.00772    0.00839 =
         0.02093    0.00352   -0.00074    0.00149
O2    1    0.095623    0.228143    0.552828    11.00000    0.01685    0.01417 =
         0.01039   -0.00026    0.00024    0.00724
O3    1    0.884385    0.168505    0.825243    11.00000    0.01126    0.01041 =
         0.01413    0.00558   -0.00230   -0.00378
O4    1    0.315934    0.404221    0.871720    11.00000    0.01149    0.00970 =
         0.01553    0.00497   -0.00472   -0.00191
O5    1    0.656124    0.841278    0.935173    11.00000    0.00762    0.01036 =
         0.00837    0.00229   -0.00043    0.00206
O6    1    0.431486    0.642436    0.624298    11.00000    0.01337    0.01100 =
         0.01131   -0.00371    0.00039    0.00578
O7    1    0.136656    0.815525    0.826424    11.00000    0.00722    0.00785 =
         0.01177   -0.00166    0.00276   -0.00058
O8    1    0.452198    1.020365    0.687976    11.00000    0.00939    0.01033 =
         0.01432    0.00717    0.00111   -0.00185
H1    2    0.213026    0.147968    0.564785    11.00000   21.00000
H2    2    0.981209    0.612478    0.771971    11.00000   21.00000
H3    2    0.348302    0.342572    0.955978    11.00000   21.00000
H4    2    0.574621    0.586522    0.629834    11.00000   21.00000
H5    2    0.598474    1.076524    0.744231    11.00000   21.00000
HKLF 5


REM  test_a.res in P-1
REM wR2 = 0.0880, GooF = S = 1.082, Restrained GooF = 1.081 for all data
REM R1 = 0.0387 for 2566 Fo > 4sig(Fo) and 0.0537 for all 3000 data
REM 114 parameters refined using 5 restraints

END

WGHT      0.0457      0.0999

REM Instructions for potential hydrogen bonds
HTAB O2 O8_$15
HTAB O1 O7_$2
HTAB O4 O5_$16
HTAB O6 O1
HTAB O8 O3_$17

REM Highest difference peak  1.338,  deepest hole -1.685,  1-sigma level  0.334
Q1    1   0.9132  0.2589  0.7758  11.00000  0.05    1.34
Q2    1   0.1211  0.3606  0.7615  11.00000  0.05    1.27
Q3    1   0.9709  0.4397  0.6529  11.00000  0.05    1.20
Q4    1   0.6193  0.9987  0.9791  11.00000  0.05    1.19
Q5    1   0.3135  0.0803  0.5180  11.00000  0.05    1.17
Q6    1   0.3677  0.6913  0.7438  11.00000  0.05    1.14
Q7    1   0.4650  0.5086  0.6007  11.00000  0.05    1.14
Q8    1   0.1508 -0.0245 -0.0522  11.00000  0.05    1.13
Q9    1   0.7259  1.0033  0.7323  11.00000  0.05    1.09
Q10   1  -0.1563  0.1026  0.4771  11.00000  0.05    1.07
Q11   1   0.0854  0.4745  0.8411  11.00000  0.05    1.05
Q12   1   0.6382  0.9402  0.6365  11.00000  0.05    1.05
Q13   1   0.4321  0.8427  0.8398  11.00000  0.05    1.04
Q14   1   0.3487  0.1428  0.4572  11.00000  0.05    1.04
Q15   1   0.0393  0.3154  0.6821  11.00000  0.05    1.03
Q16   1   0.8578  0.1193  0.8675  11.00000  0.05    1.03
Q17   1   0.4408  0.8350  0.7175  11.00000  0.05    1.02
Q18   1   0.2197  0.4449  0.6219  11.00000  0.05    1.01
Q19   1   0.4504  0.8547  0.9384  11.00000  0.05    1.01
Q20   1   0.5192  0.7711  0.7820  11.00000  0.05    1.00
;
_shelx_res_checksum   15445

_shelx_hkl_file
;
   1   0   0 442.729 6.64950   1
  -2   0   1 6295.96 78.5294  -2
   2   0   0 6295.96 78.5294   1
   3   0   0 506.695 9.69660   1
  -4   0   2 113.649 8.48971  -2
   4   0   0 113.649 8.48971   1
   5   0   0 375.862 11.4771   1
  -6   0   3 846.291 26.9924  -2
   6   0   0 846.291 26.9924   1
  -7   0   3 508.904 28.5545  -2
   7   0   0 508.904 28.5545   1
  -8   0   4 35.8270 51.1790  -2
   8   0   0 35.8270 51.1790   1
  -8   1   3 -40.939 35.0865  -2
  -8   1   0 -40.939 35.0865   1
  -7   1   3 1025.86 35.3462  -2
  -7   1   0 1025.86 35.3462   1
  -6   1   0 549.565 16.8887   1
  -5   1   2 605.015 15.8828  -2
  -5   1   0 605.015 15.8828   1
  -4   1   0 2855.84 37.7175   1
  -3   1   1 395.057 8.91177  -2
  -3   1   0 395.057 8.91177   1
  -2   1   0 2062.01 25.3623   1
  -1   1   0 1138.50 15.5028  -2
  -1   1   0 1138.50 15.5028   1
   0   1   0 412.612 4.76056   1
  -1  -1   1 2855.69 55.4712  -2
   1   1   0 2855.69 55.4712   1
   2   1   0 178.262 5.17443   1
  -3  -1   2 97.4560 12.3023  -2
   3   1   0 97.4560 12.3023   1
  -4  -1   2 4868.88 157.899  -2
   4   1   0 4868.88 157.899   1
  -5  -1   3 97.6218 16.4700  -2
   5   1   0 97.6218 16.4700   1
  -6  -1   3 847.452 25.9995  -2
   6   1   0 847.452 25.9995   1
   7   1   0 16.3933 11.3950   1
  -8  -1   4 -1.0592 24.2290  -2
   8   1   0 -1.0592 24.2290   1
  -8   2   3 122.669 27.5975  -2
  -8   2   0 122.669 27.5975   1
  -7   2   0 32.7902 12.3125   1
  -6   2   2 192.713 15.4558  -2
  -6   2   0 192.713 15.4558   1
  -5   2   0 711.885 14.9371   1
  -4   2   1 349.756 8.75901  -2
  -4   2   0 349.756 8.75901   1
  -3   2   0 1460.96 19.7820   1
  -2   2   0 625.718 10.6670  -2
  -2   2   0 625.718 10.6670   1
  -1   2   0 1062.13 14.0058   1
   0  -2   1 4213.53 83.7631  -2
   0   2   0 4213.53 83.7631   1
   1   2   0 660.333 9.58162   1
  -2  -2   2 856.461 36.9284  -2
   2   2   0 856.461 36.9284   1
  -3  -2   2 1503.48 47.7048  -2
   3   2   0 1503.48 47.7048   1
   4   2   0 167.848 6.47885   1
  -5  -2   3 927.944 22.2698  -2
   5   2   0 927.944 22.2698   1
   6   2   0 417.914 17.3324   1
  -7  -2   4 45.0724 21.7521  -2
   7   2   0 45.0724 21.7521   1
   8   2   0 635.509 30.2930   1
  -8   3   2 13.8866 58.9592  -2
  -8   3   0 13.8866 58.9592   1
  -7   3   2 873.737 28.9445  -2
  -7   3   0 873.737 28.9445   1
  -6   3   0 240.609 12.8900   1
  -5   3   1 9.88340 9.86041  -2
  -5   3   0 9.88340 9.86041   1
  -4   3   0 1486.29 22.1804   1
  -3   3   0 1549.93 20.8246  -2
  -3   3   0 1549.93 20.8246   1
  -2   3   0 345.912 7.77962   1
   1  -3   1 5230.21 114.512  -2
  -1   3   0 5230.21 114.512   1
   0   3   0 13.6644 2.49734   1
   1   3   0 2010.90 27.9393   1
  -2  -3   2 1521.56 38.6721  -2
   2   3   0 1521.56 38.6721   1
   3   3   0 1719.24 26.4213   1
  -4  -3   3 2851.98 51.0344  -2
   4   3   0 2851.98 51.0344   1
   5   3   0 110.767 9.02625   1
  -6  -3   4 1129.30 31.4194  -2
   6   3   0 1129.30 31.4194   1
   7   3   0 121.327 14.8138   1
  -8  -3   5 7.00973 23.8115  -2
   8   3   0 7.00973 23.8115   1
  -8   4   2 1045.07 38.8595  -2
  -8   4   0 1045.07 38.8595   1
  -7   4   0 61.0879 11.6757   1
  -6   4   1 413.131 17.6785  -2
  -6   4   0 413.131 17.6785   1
  -5   4   0 759.490 17.2352   1
  -4   4   0 14.8694 8.99485  -2
  -4   4   0 14.8694 8.99485   1
  -3   4   0 1869.02 27.3776   1
   2  -4   1 287.220 25.2096  -2
  -2   4   0 287.220 25.2096   1
   1  -4   1 2384.90 138.916  -2
  -1   4   0 2384.90 138.916   1
   0  -4   2 248.428 51.6378  -2
   0   4   0 248.428 51.6378   1
  -1  -4   2 1822.72 28.5491  -2
   1   4   0 1822.72 28.5491   1
   2   4   0 2.87370 2.63392   1
  -3  -4   3 2019.77 36.6785  -2
   3   4   0 2019.77 36.6785   1
   4   4   0 182.355 8.85060   1
  -5  -4   4 1202.12 25.8768  -2
   5   4   0 1202.12 25.8768   1
   6   4   0 10.8235 10.6943   1
  -7  -4   5 74.0259 26.0474  -2
   7   4   0 74.0259 26.0474   1
  -8  -4   5 482.436 103.724  -2
   8   4   0 482.436 103.724   1
  -8   5   2 121.809 67.7370  -2
  -8   5   0 121.809 67.7370   1
  -7   5   1 693.141 30.4784  -2
  -7   5   0 693.141 30.4784   1
  -6   5   0 438.184 18.7404   1
  -5   5   0 247.017 17.2268  -2
  -5   5   0 247.017 17.2268   1
  -4   5   0 2598.46 74.9712  -2
  -4   5   0 2598.46 74.9712   1
   3  -5   1 869.395 45.0256  -2
  -3   5   0 869.395 45.0256   1
   2  -5   1 367.263 17.6225  -2
  -2   5   0 367.263 17.6225   1
  -1   5   0 260.074 8.02857   1
   0  -5   2 547.979 10.7847  -2
   0   5   0 547.979 10.7847   1
   1   5   0 1424.45 21.3244   1
  -2  -5   3 496.242 11.9511  -2
   2   5   0 496.242 11.9511   1
   3   5   0 478.723 13.8977   1
  -4  -5   4 582.645 18.4618  -2
   4   5   0 582.645 18.4618   1
   5   5   0 22.3747 10.6044   1
  -6  -5   5 501.831 33.0695  -2
   6   5   0 501.831 33.0695   1
  -7  -5   5 990.067 70.5485  -2
   7   5   0 990.067 70.5485   1
  -8   6   1 228.538 53.1092  -2
  -8   6   0 228.538 53.1092   1
  -7   6   1 242.256 43.8842  -2
  -7   6   0 242.256 43.8842   1
  -6   6   0 343.083 25.2299  -2
  -6   6   0 343.083 25.2299   1
  -5   6   0 393.604 20.4594  -2
  -5   6   0 393.604 20.4594   1
   4  -6   1 4.30219 25.3617  -2
  -4   6   0 4.30219 25.3617   1
   3  -6   1 1513.23 30.1959  -2
  -3   6   0 1513.23 30.1959   1
  -2   6   0 1596.99 27.3250   1
   1  -6   2 102.030 8.88060  -2
  -1   6   0 102.030 8.88060   1
   0   6   0 4598.05 64.8950   1
  -1  -6   3 496.915 12.6075  -2
   1   6   0 496.915 12.6075   1
   2   6   0 1947.68 32.8309   1
  -3  -6   4 1538.72 39.2246  -2
   3   6   0 1538.72 39.2246   1
   4   6   0 39.3144 10.8327   1
  -5  -6   5 582.135 34.0928  -2
   5   6   0 582.135 34.0928   1
  -6  -6   5 252.637 40.5201  -2
   6   6   0 252.637 40.5201   1
  -7  -6   6 311.908 40.7223  -2
   7   6   0 311.908 40.7223   1
  -7   7   0 705.089 42.5935  -2
  -7   7   0 705.089 42.5935   1
  -6   7   0 884.682 35.4595  -2
  -6   7   0 884.682 35.4595   1
  -5   7   0 300.540 14.7977   1
   4  -7   1 1420.92 32.3335  -2
  -4   7   0 1420.92 32.3335   1
  -3   7   0 36.3238 7.13609   1
   2  -7   2 1300.03 26.3509  -2
  -2   7   0 1300.03 26.3509   1
  -1   7   0 125.315 10.9104   1
   0  -7   3 304.149 16.8210  -2
   0   7   0 304.149 16.8210   1
   1   7   0 20.0673 8.26756   1
  -2  -7   4 722.214 29.9362  -2
   2   7   0 722.214 29.9362   1
   3   7   0 172.948 13.2129   1
  -4  -7   5 528.549 31.1082  -2
   4   7   0 528.549 31.1082   1
  -5  -7   5 160.232 37.3370  -2
   5   7   0 160.232 37.3370   1
  -6  -7   6 217.717 37.4656  -2
   6   7   0 217.717 37.4656   1
  -6   8   0 71.9464 18.8166   1
   5  -8   1 265.331 19.8788  -2
  -5   8   0 265.331 19.8788   1
  -4   8   0 67.5802 10.9680   1
   3  -8   2 1041.07 31.9398  -2
  -3   8   0 1041.07 31.9398   1
  -2   8   0 231.788 15.5398   1
   1  -8   3 465.042 23.6902  -2
  -1   8   0 465.042 23.6902   1
   0   8   0 389.284 20.6972   1
  -1  -8   4 214.761 19.4431  -2
   1   8   0 214.761 19.4431   1
   2   8   0 81.6467 13.7072   1
  -3  -8   5 1458.54 48.9157  -2
   3   8   0 1458.54 48.9157   1
  -4  -8   5 39.5737 32.2036  -2
   4   8   0 39.5737 32.2036   1
  -5  -8   6 168.264 47.3526  -2
   5   8   0 168.264 47.3526   1
   6  -9   1 272.432 45.3438  -2
  -6   9   0 272.432 45.3438   1
  -5   9   0 68.6191 14.5403   1
   4  -9   2 162.790 22.9586  -2
  -4   9   0 162.790 22.9586   1
  -3   9   0 205.949 20.6997   1
   2  -9   3 192.050 22.9573  -2
  -2   9   0 192.050 22.9573   1
  -1   9   0 994.934 33.6816   1
   0  -9   4 123.257 25.5749  -2
   0   9   0 123.257 25.5749   1
  -1  -9   4 1185.28 56.8517  -2
   1   9   0 1185.28 56.8517   1
  -2  -9   5 223.014 31.3912  -2
   2   9   0 223.014 31.3912   1
  -3  -9   5 292.347 31.9928  -2
   3   9   0 292.347 31.9928   1
  -4  -9   6 803.534 64.3538  -2
   4   9   0 803.534 64.3538   1
   5 -10   2 459.208 38.6518  -2
  -5  10   0 459.208 38.6518   1
  -4  10   0 9.76911 16.6829   1
   3 -10   3 1047.16 43.8165  -2
  -3  10   0 1047.16 43.8165   1
   2 -10   3 370.808 64.9388  -2
  -2  10   0 370.808 64.9388   1
   1 -10   4 811.083 39.4702  -2
  -1  10   0 811.083 39.4702   1
   0 -10   4 63.9641 39.6173  -2
   0  10   0 63.9641 39.6173   1
  -1 -10   5 4.60593 44.8672  -2
   1  10   0 4.60593 44.8672   1
  -2 -10   5 114.551 31.5887  -2
   2  10   0 114.551 31.5887   1
  -3 -10   6 484.450 58.4114  -2
   3  10   0 484.450 58.4114   1
   3 -11   3 40.9229 37.7675  -2
  -3  11   0 40.9229 37.7675   1
   2 -11   4 11.8686 32.2885  -2
  -2  11   0 11.8686 32.2885   1
   1 -11   4 258.447 41.5095  -2
  -1  11   0 258.447 41.5095   1
   0 -11   5 148.965 65.7535  -2
   0  11   0 148.965 65.7535   1
  -1 -11   5 311.456 42.1082  -2
   1  11   0 311.456 42.1082   1
   2  11   0 22.7735 21.2686   1
   1 -12   1 146.687 73.5101   1
  -3 -11   5 94.6104 44.3178  -2
  -3 -11   1 94.6104 44.3178   1
  -2 -11   5 576.171 86.0572  -2
  -2 -11   1 576.171 86.0572   1
  -1 -11   4 544.828 39.5694  -2
  -1 -11   1 544.828 39.5694   1
   0 -11   4 72.4734 65.8880  -2
   0 -11   1 72.4734 65.8880   1
   1 -11   3 497.968 47.2046  -2
   1 -11   1 497.968 47.2046   1
   2 -11   3 329.966 34.4929  -2
   2 -11   1 329.966 34.4929   1
   3 -11   2 81.6618 39.7591  -2
   3 -11   1 81.6618 39.7591   1
   4 -11   2 524.616 60.7756  -2
   4 -11   1 524.616 60.7756   1
  -4 -10   5 27.4740 27.7714  -2
  -4 -10   1 27.4740 27.7714   1
  -3 -10   5 150.592 63.3239  -2
  -3 -10   1 150.592 63.3239   1
  -2 -10   4 481.713 37.5440  -2
  -2 -10   1 481.713 37.5440   1
  -1 -10   4 -19.053 50.5400  -2
  -1 -10   1 -19.053 50.5400   1
   0 -10   3 1293.22 63.0178  -2
   0 -10   1 1293.22 63.0178   1
   1 -10   3 66.9223 29.3317  -2
   1 -10   1 66.9223 29.3317   1
   2 -10   2 125.773 59.3624  -2
   2 -10   1 125.773 59.3624   1
   3 -10   2 309.310 32.1876  -2
   3 -10   1 309.310 32.1876   1
   4 -10   1 116.897 20.3902   1
   5 -10   1 102.045 34.6988  -2
   5 -10   1 102.045 34.6988   1
  -5  -9   5 38.4837 36.1893  -2
  -5  -9   1 38.4837 36.1893   1
  -4  -9   5 103.977 49.9702  -2
  -4  -9   1 103.977 49.9702   1
  -3  -9   4 296.905 31.7469  -2
  -3  -9   1 296.905 31.7469   1
  -2  -9   4 632.855 37.7544  -2
  -2  -9   1 632.855 37.7544   1
  -1  -9   3 557.033 46.4791  -2
  -1  -9   1 557.033 46.4791   1
   0  -9   3 142.454 22.3803  -2
   0  -9   1 142.454 22.3803   1
   1  -9   1 360.619 22.0029   1
   2  -9   2 1045.76 36.8823  -2
   2  -9   1 1045.76 36.8823   1
   3  -9   1 182.203 17.4752   1
   4  -9   1 1921.25 51.0070  -2
   4  -9   1 1921.25 51.0070   1
   5  -9   1 27.9196 13.9921   1
  -6   9   0 365.359 65.7007  -2
   6  -9   1 365.359 65.7007   1
  -6  -8   5 104.631 34.8456  -2
  -6  -8   1 104.631 34.8456   1
  -5  -8   5 1449.15 69.1243  -2
  -5  -8   1 1449.15 69.1243   1
  -4  -8   4 62.9202 26.3742  -2
  -4  -8   1 62.9202 26.3742   1
  -3  -8   4 1416.33 49.1851  -2
  -3  -8   1 1416.33 49.1851   1
  -2  -8   3 350.884 73.1106  -2
  -2  -8   1 350.884 73.1106   1
  -1  -8   3 310.121 26.8981  -2
  -1  -8   1 310.121 26.8981   1
   0  -8   2 1688.49 141.380  -2
   0  -8   1 1688.49 141.380   1
   1  -8   2 165.215 17.4608  -2
   1  -8   1 165.215 17.4608   1
   2  -8   1 280.548 14.0269   1
   3  -8   1 184.353 13.2619  -2
   3  -8   1 184.353 13.2619   1
   4  -8   1 165.071 12.6625   1
  -5   8   0 197.210 19.2500  -2
   5  -8   1 197.210 19.2500   1
  -6   8   0 107.841 38.0074  -2
   6  -8   1 107.841 38.0074   1
  -6  -7   5 77.2829 34.9554  -2
  -6  -7   1 77.2829 34.9554   1
  -5  -7   4 94.4636 31.3512  -2
  -5  -7   1 94.4636 31.3512   1
  -4  -7   4 407.787 22.9999  -2
  -4  -7   1 407.787 22.9999   1
  -3  -7   1 59.7599 9.49751   1
  -2  -7   3 150.492 17.3926  -2
  -2  -7   1 150.492 17.3926   1
  -1  -7   1 900.316 19.3638   1
   0  -7   2 389.860 13.8418  -2
   0  -7   1 389.860 13.8418   1
   1  -7   2 944.725 113.389  -2
   1  -7   1 944.725 113.389   1
   2  -7   1 44.4402 11.8472  -2
   2  -7   1 44.4402 11.8472   1
   3  -7   1 14.1245 6.76566   1
  -4   7   0 1090.52 28.4045  -2
   4  -7   1 1090.52 28.4045   1
  -5   7   0 347.660 34.3449  -2
   5  -7   1 347.660 34.3449   1
  -6   7   1 321.076 28.8753  -2
   6  -7   1 321.076 28.8753   1
  -7   7   1 417.439 36.2680  -2
   7  -7   1 417.439 36.2680   1
  -7  -6   5 44.0455 35.2515  -2
  -7  -6   1 44.0455 35.2515   1
  -6  -6   4 27.0939 36.6441  -2
  -6  -6   1 27.0939 36.6441   1
  -5  -6   4 659.707 29.8469  -2
  -5  -6   1 659.707 29.8469   1
  -4  -6   1 149.843 10.3138   1
  -3  -6   3 1116.37 23.3364  -2
  -3  -6   1 1116.37 23.3364   1
  -2  -6   1 1106.14 19.5811   1
  -1  -6   2 45.4272 5.80906  -2
  -1  -6   1 45.4272 5.80906   1
   0  -6   1 832.307 18.7479   1
   1  -6   1 1491.93 27.0455  -2
   1  -6   1 1491.93 27.0455   1
   2  -6   1 21.9460 5.53992   1
  -3   6   0 2137.41 36.7027  -2
   3  -6   1 2137.41 36.7027   1
  -4   6   0 24.3278 36.0512  -2
   4  -6   1 24.3278 36.0512   1
  -5   6   1 2389.17 46.0160  -2
   5  -6   1 2389.17 46.0160   1
  -6   6   1 162.017 25.5334  -2
   6  -6   1 162.017 25.5334   1
  -7   6   2 375.037 48.2435  -2
   7  -6   1 375.037 48.2435   1
  -7  -5   4 531.370 47.4612  -2
  -7  -5   1 531.370 47.4612   1
  -6  -5   4 1272.21 40.2166  -2
  -6  -5   1 1272.21 40.2166   1
  -5  -5   1 13.9550 8.33947   1
  -4  -5   3 2219.72 42.0089  -2
  -4  -5   1 2219.72 42.0089   1
  -3  -5   1 312.202 11.9502   1
  -2  -5   2 642.105 13.5042  -2
  -2  -5   1 642.105 13.5042   1
  -1  -5   1 1929.51 29.0983   1
   0  -5   1 75.4052 8.44414  -2
   0  -5   1 75.4052 8.44414   1
   1  -5   1 7005.34 356.923  -2
   1  -5   1 7005.34 356.923   1
  -2   5   0 334.135 17.1960  -2
   2  -5   1 334.135 17.1960   1
  -3   5   0 971.545 39.8403  -2
   3  -5   1 971.545 39.8403   1
  -4   5   1 428.811 41.9300  -2
   4  -5   1 428.811 41.9300   1
  -5   5   1 528.445 20.7221  -2
   5  -5   1 528.445 20.7221   1
  -6   5   2 475.624 63.5338  -2
   6  -5   1 475.624 63.5338   1
  -7   5   2 287.410 26.1771  -2
   7  -5   1 287.410 26.1771   1
   8  -5   1 97.6284 21.3466   1
  -8  -4   4 600.855 111.137  -2
  -8  -4   1 600.855 111.137   1
  -7  -4   4 5.95359 22.3153  -2
  -7  -4   1 5.95359 22.3153   1
  -6  -4   1 392.187 17.5801   1
  -5  -4   3 225.990 13.3133  -2
  -5  -4   1 225.990 13.3133   1
  -4  -4   1 127.597 8.72921   1
  -3  -4   2 2749.74 48.3025  -2
  -3  -4   1 2749.74 48.3025   1
  -2  -4   1 1475.58 22.7619   1
  -1  -4   1 419.629 12.3047  -2
  -1  -4   1 419.629 12.3047   1
   0  -4   1 5737.24 286.692  -2
   0  -4   1 5737.24 286.692   1
  -1   4   0 1476.81 61.8555  -2
   1  -4   1 1476.81 61.8555   1
  -2   4   0 348.967 22.9409  -2
   2  -4   1 348.967 22.9409   1
   3  -4   1 90.3002 5.32681   1
  -4   4   1 75.1385 10.2829  -2
   4  -4   1 75.1385 10.2829   1
   5  -4   1 144.858 9.57221   1
  -6   4   2 464.622 18.4805  -2
   6  -4   1 464.622 18.4805   1
   7  -4   1 68.1430 11.8751   1
  -8   4   3 252.612 24.7642  -2
   8  -4   1 252.612 24.7642   1
  -8  -3   4 35.8837 22.3302  -2
  -8  -3   1 35.8837 22.3302   1
  -7  -3   1 228.570 17.2917   1
  -6  -3   3 142.043 16.6805  -2
  -6  -3   1 142.043 16.6805   1
  -5  -3   1 0.40395 6.14491   1
  -4  -3   2 1636.55 30.2512  -2
  -4  -3   1 1636.55 30.2512   1
  -3  -3   2 97.9453 48.4933  -2
  -3  -3   1 97.9453 48.4933   1
  -2  -3   1 825.931 30.4072  -2
  -2  -3   1 825.931 30.4072   1
  -1  -3   1 663.950 10.9714   1
   0   3   0 50.8624 40.6812  -2
   0  -3   1 50.8624 40.6812   1
  -1   3   0 5166.65 102.621  -2
   1  -3   1 5166.65 102.621   1
   2  -3   1 2930.40 38.9976   1
  -3   3   1 547.037 11.5350  -2
   3  -3   1 547.037 11.5350   1
   4  -3   1 3909.79 50.4043   1
  -5   3   2 600.374 15.2590  -2
   5  -3   1 600.374 15.2590   1
   6  -3   1 528.502 20.3295   1
  -7   3   3 751.863 26.9041  -2
   7  -3   1 751.863 26.9041   1
   8  -3   1 27.7382 13.5589   1
  -8  -2   1 28.3490 14.1896   1
  -7  -2   3 196.915 27.5387  -2
  -7  -2   1 196.915 27.5387   1
  -6  -2   1 11.1257 7.19249   1
  -5  -2   2 1684.46 35.1339  -2
  -5  -2   1 1684.46 35.1339   1
  -4  -2   2 95.2793 43.6985  -2
  -4  -2   1 95.2793 43.6985   1
  -3  -2   1 8691.85 279.949  -2
  -3  -2   1 8691.85 279.949   1
  -2  -2   1 2731.26 40.0913   1
  -1  -2   1 3070.01 41.6349   1
   0   2   0 5319.46 104.703  -2
   0  -2   1 5319.46 104.703   1
   1  -2   1 25.0940 2.78774   1
  -2   2   1 954.092 14.5135  -2
   2  -2   1 954.092 14.5135   1
   3  -2   1 73.7594 4.50204   1
  -4   2   2 382.386 8.95850  -2
   4  -2   1 382.386 8.95850   1
   5  -2   1 1.46627 5.59532   1
  -6   2   3 814.330 25.9649  -2
   6  -2   1 814.330 25.9649   1
   7  -2   1 67.0388 13.3546   1
  -8   2   4 523.799 33.1539  -2
   8  -2   1 523.799 33.1539   1
  -8  -1   3 49.6219 29.7327  -2
  -8  -1   1 49.6219 29.7327   1
  -7  -1   3 1016.04 110.141  -2
  -7  -1   1 1016.04 110.141   1
  -6  -1   2 720.872 27.2222  -2
  -6  -1   1 720.872 27.2222   1
  -5  -1   2 822.585 41.7800  -2
  -5  -1   1 822.585 41.7800   1
  -4  -1   1 123.322 28.6122  -2
  -4  -1   1 123.322 28.6122   1
  -3  -1   1 490.914 20.4009  -2
  -3  -1   1 490.914 20.4009   1
  -2  -1   1 1564.47 22.4459   1
   1   1   0 3801.75 72.5400  -2
  -1  -1   1 3801.75 72.5400   1
   0  -1   1 613.990 8.98618   1
  -1   1   1 7816.01 93.3158  -2
   1  -1   1 7816.01 93.3158   1
   2  -1   1 416.346 7.86173   1
  -3   1   2 1196.91 17.5954  -2
   3  -1   1 1196.91 17.5954   1
   4  -1   1 1294.43 19.8425   1
  -5   1   3 389.274 13.7933  -2
   5  -1   1 389.274 13.7933   1
   6  -1   1 396.799 14.2599   1
  -7   1   4 1372.67 40.4953  -2
   7  -1   1 1372.67 40.4953   1
  -8   1   4 -39.417 32.8800  -2
   8  -1   1 -39.417 32.8800   1
  -8   0   3 506.279 42.1853  -2
  -8   0   1 506.279 42.1853   1
  -7   0   2 57.0400 27.7505  -2
  -7   0   1 57.0400 27.7505   1
  -6   0   2 510.503 20.5047  -2
  -6   0   1 510.503 20.5047   1
  -5   0   1 1003.45 18.4894   1
  -4   0   1 284.679 9.60289  -2
  -4   0   1 284.679 9.60289   1
  -3   0   1 1063.87 15.7004   1
   2   0   0 5022.86 63.0678  -2
  -2   0   1 5022.86 63.0678   1
  -1   0   1 602.841 8.46773   1
   0   0   1 1302.23 14.4122  -2
   0   0   1 1302.23 14.4122   1
   1   0   1 1804.97 19.5597   1
  -2   0   2 1486.11 22.8678  -2
   2   0   1 1486.11 22.8678   1
   3   0   1 5236.66 74.2956   1
  -4   0   3 301.807 9.86353  -2
   4   0   1 301.807 9.86353   1
  -5   0   3 3441.53 120.404  -2
   5   0   1 3441.53 120.404   1
  -6   0   4 483.963 20.6430  -2
   6   0   1 483.963 20.6430   1
  -7   0   4 524.418 27.7489  -2
   7   0   1 524.418 27.7489   1
  -8   0   5 729.654 45.8055  -2
   8   0   1 729.654 45.8055   1
  -9   1   1 -35.436 62.6773   1
  -8   1   2 55.1089 35.1352  -2
  -8   1   1 55.1089 35.1352   1
  -7   1   2 337.477 32.8504  -2
  -7   1   1 337.477 32.8504   1
  -6   1   1 1237.77 25.9010   1
  -5   1   1 48.5316 10.4957  -2
  -5   1   1 48.5316 10.4957   1
  -4   1   1 3058.96 39.9879   1
  -3   1   0 375.997 8.21323  -2
  -3   1   1 375.997 8.21323   1
  -2   1   1 268.244 5.47161   1
   1  -1   1 8569.67 94.8043  -2
  -1   1   1 8569.67 94.8043   1
   0   1   1 605.501 11.1504   1
  -1  -1   2 9028.25 153.364  -2
   1   1   1 9028.25 153.364   1
   2   1   1 1095.58 15.8473   1
  -3  -1   3 3789.09 74.7402  -2
   3   1   1 3789.09 74.7402   1
  -4  -1   3 529.505 27.4828  -2
   4   1   1 529.505 27.4828   1
  -5  -1   4 39.4905 17.0724  -2
   5   1   1 39.4905 17.0724   1
  -6  -1   4 34.6729 14.3602  -2
   6   1   1 34.6729 14.3602   1
  -7  -1   5 1005.25 61.5551  -2
   7   1   1 1005.25 61.5551   1
  -8  -1   5 86.8362 33.5765  -2
   8   1   1 86.8362 33.5765   1
  -8   2   2 980.374 47.0817  -2
  -8   2   1 980.374 47.0817   1
  -7   2   1 13.9685 11.1949   1
  -6   2   1 1513.42 32.8831  -2
  -6   2   1 1513.42 32.8831   1
  -5   2   1 8.17200 5.74970   1
  -4   2   0 406.765 9.26002  -2
  -4   2   1 406.765 9.26002   1
  -3   2   1 289.888 6.69358   1
   2  -2   1 700.685 10.9832  -2
  -2   2   1 700.685 10.9832   1
  -1   2   1 979.270 13.7057   1
   0  -2   2 6267.40 139.388  -2
   0   2   1 6267.40 139.388   1
   1   2   1 159.703 4.47128   1
  -2  -2   3 593.263 26.5143  -2
   2   2   1 593.263 26.5143   1
  -3  -2   3 2255.97 62.9501  -2
   3   2   1 2255.97 62.9501   1
  -4  -2   4 81.3860 30.2498  -2
   4   2   1 81.3860 30.2498   1
  -5  -2   4 543.162 18.0917  -2
   5   2   1 543.162 18.0917   1
   6   2   1 8.68123 8.01346   1
  -7  -2   5 77.7001 21.5051  -2
   7   2   1 77.7001 21.5051   1
   8   2   1 77.8316 18.7874   1
  -8   3   1 43.6551 16.3100   1
  -7   3   1 223.145 19.1760  -2
  -7   3   1 223.145 19.1760   1
  -6   3   1 81.3776 9.33124   1
  -5   3   0 21.2209 9.49965  -2
  -5   3   1 21.2209 9.49965   1
  -4   3   1 699.323 12.4557   1
   3  -3   1 478.984 9.86806  -2
  -3   3   1 478.984 9.86806   1
  -2   3   1 1417.03 18.6830   1
   1  -3   2 1494.98 32.8043  -2
  -1   3   1 1494.98 32.8043   1
   0   3   1 86.6729 3.65754   1
   1   3   1 61.6944 3.76935   1
  -2  -3   3 4772.28 84.1244  -2
   2   3   1 4772.28 84.1244   1
   3   3   1 44.2883 4.47601   1
  -4  -3   4 3861.29 61.5341  -2
   4   3   1 3861.29 61.5341   1
   5   3   1 88.1576 8.43241   1
  -6  -3   5 647.138 23.6761  -2
   6   3   1 647.138 23.6761   1
   7   3   1 332.649 19.6492   1
  -8  -3   6 45.2271 29.7990  -2
   8   3   1 45.2271 29.7990   1
  -8   4   1 -20.727 26.8329  -2
  -8   4   1 -20.727 26.8329   1
  -7   4   1 165.561 13.1700   1
  -6   4   0 352.791 16.4640  -2
  -6   4   1 352.791 16.4640   1
  -5   4   1 1654.19 29.5218   1
   4  -4   1 61.1000 10.3279  -2
  -4   4   1 61.1000 10.3279   1
  -3   4   1 1833.83 26.9398   1
   2  -4   2 2993.52 137.082  -2
  -2   4   1 2993.52 137.082   1
   1  -4   2 828.558 41.8316  -2
  -1   4   1 828.558 41.8316   1
   0   4   1 3193.46 42.7749   1
  -1  -4   3 195.111 8.26877  -2
   1   4   1 195.111 8.26877   1
   2   4   1 2264.60 32.8552   1
  -3  -4   4 874.837 20.1390  -2
   3   4   1 874.837 20.1390   1
   4   4   1 528.538 17.7167   1
  -5  -4   5 255.184 15.4330  -2
   5   4   1 255.184 15.4330   1
   6   4   1 18.0153 10.8423   1
  -7  -4   6 270.183 30.2531  -2
   7   4   1 270.183 30.2531   1
  -8  -4   6 584.387 98.6165  -2
   8   4   1 584.387 98.6165   1
  -8   5   1 14.8804 17.6847   1
  -7   5   0 925.319 34.8737  -2
  -7   5   1 925.319 34.8737   1
  -6   5   1 156.026 13.0234   1
   5  -5   1 651.328 20.6074  -2
  -5   5   1 651.328 20.6074   1
   4  -5   1 351.623 36.2132  -2
  -4   5   1 351.623 36.2132   1
   3  -5   2 235.148 28.8676  -2
  -3   5   1 235.148 28.8676   1
   2  -5   2 1990.67 43.4820  -2
  -2   5   1 1990.67 43.4820   1
  -1   5   1 2030.80 31.7833   1
   0  -5   3 838.294 15.5692  -2
   0   5   1 838.294 15.5692   1
   1   5   1 451.109 10.5319   1
  -2  -5   4 474.587 13.7119  -2
   2   5   1 474.587 13.7119   1
   3   5   1 10.3018 6.20882   1
  -4  -5   5 1887.23 52.0377  -2
   4   5   1 1887.23 52.0377   1
   5   5   1 12.5184 12.0019   1
  -6  -5   6 411.950 31.6749  -2
   6   5   1 411.950 31.6749   1
  -7  -5   6 220.758 43.9179  -2
   7   5   1 220.758 43.9179   1
  -8   6   0 262.325 54.9600  -2
  -8   6   1 262.325 54.9600   1
  -7   6   0 208.922 42.6077  -2
  -7   6   1 208.922 42.6077   1
   6  -6   1 110.383 21.5786  -2
  -6   6   1 110.383 21.5786   1
   5  -6   1 2011.96 40.2610  -2
  -5   6   1 2011.96 40.2610   1
   4  -6   2 114.026 28.0817  -2
  -4   6   1 114.026 28.0817   1
   3  -6   2 1349.69 28.7803  -2
  -3   6   1 1349.69 28.7803   1
  -2   6   1 77.6063 6.48253   1
   1  -6   3 304.280 13.9799  -2
  -1   6   1 304.280 13.9799   1
   0   6   1 17.8912 4.47051   1
  -1  -6   4 903.891 18.2664  -2
   1   6   1 903.891 18.2664   1
   2   6   1 48.6455 7.30761   1
  -3  -6   5 1184.07 33.2274  -2
   3   6   1 1184.07 33.2274   1
   4   6   1 64.3694 13.2668   1
  -5  -6   6 1048.83 43.4534  -2
   5   6   1 1048.83 43.4534   1
  -6  -6   6 178.186 41.5728  -2
   6   6   1 178.186 41.5728   1
  -7  -6   7 299.461 83.9538  -2
   7   6   1 299.461 83.9538   1
   7  -7   1 295.728 39.0631  -2
  -7   7   1 295.728 39.0631   1
   6  -7   1 355.260 24.5982  -2
  -6   7   1 355.260 24.5982   1
  -5   7   1 36.1199 9.04999   1
   4  -7   2 1356.51 29.3604  -2
  -4   7   1 1356.51 29.3604   1
  -3   7   1 166.087 10.0642   1
   2  -7   3 746.343 21.4407  -2
  -2   7   1 746.343 21.4407   1
  -1   7   1 1159.55 29.1352   1
   0  -7   4 225.174 18.8851  -2
   0   7   1 225.174 18.8851   1
   1   7   1 2147.81 45.7437   1
  -2  -7   5 150.674 17.9279  -2
   2   7   1 150.674 17.9279   1
   3   7   1 824.522 25.1284   1
  -4  -7   6 594.543 33.7108  -2
   4   7   1 594.543 33.7108   1
  -5  -7   6 150.756 37.2441  -2
   5   7   1 150.756 37.2441   1
  -6  -7   7 106.135 36.9500  -2
   6   7   1 106.135 36.9500   1
   6  -8   2 544.767 71.2421  -2
  -6   8   1 544.767 71.2421   1
   5  -8   2 528.623 28.0942  -2
  -5   8   1 528.623 28.0942   1
  -4   8   1 371.290 19.6735   1
   3  -8   3 1189.21 39.3997  -2
  -3   8   1 1189.21 39.3997   1
  -2   8   1 29.3099 11.5465   1
   1  -8   4 517.757 24.1457  -2
  -1   8   1 517.757 24.1457   1
   0   8   1 250.142 17.6540   1
  -1  -8   5 532.704 24.7199  -2
   1   8   1 532.704 24.7199   1
  -2  -8   5 204.306 79.5889  -2
   2   8   1 204.306 79.5889   1
  -3  -8   6 316.083 26.2207  -2
   3   8   1 316.083 26.2207   1
  -4  -8   6 39.4992 33.2868  -2
   4   8   1 39.4992 33.2868   1
  -5  -8   7 240.080 52.0432  -2
   5   8   1 240.080 52.0432   1
   6  -9   2 59.4814 43.7428  -2
  -6   9   1 59.4814 43.7428   1
  -5   9   1 54.7078 16.5357   1
   4  -9   3 598.824 31.5648  -2
  -4   9   1 598.824 31.5648   1
  -3   9   1 -2.1650 13.1815   1
   2  -9   4 557.001 28.3847  -2
  -2   9   1 557.001 28.3847   1
  -1   9   1 4.33663 12.3752   1
   0  -9   5 72.4837 24.2446  -2
   0   9   1 72.4837 24.2446   1
  -1  -9   5 475.185 34.8027  -2
   1   9   1 475.185 34.8027   1
  -2  -9   6 455.404 33.9200  -2
   2   9   1 455.404 33.9200   1
  -3  -9   6 63.3940 27.3204  -2
   3   9   1 63.3940 27.3204   1
  -4  -9   7 627.330 60.2111  -2
   4   9   1 627.330 60.2111   1
   5 -10   3 292.699 35.2343  -2
  -5  10   1 292.699 35.2343   1
  -4  10   1 28.3107 16.4092   1
   3 -10   4 486.003 33.6108  -2
  -3  10   1 486.003 33.6108   1
   2 -10   4 308.613 38.1997  -2
  -2  10   1 308.613 38.1997   1
   1 -10   5 49.6385 27.8992  -2
  -1  10   1 49.6385 27.8992   1
   0 -10   5 1451.92 65.6993  -2
   0  10   1 1451.92 65.6993   1
  -1 -10   6 200.155 49.5978  -2
   1  10   1 200.155 49.5978   1
  -2 -10   6 663.301 38.4746  -2
   2  10   1 663.301 38.4746   1
   3  10   1 43.5558 18.0557   1
   3 -11   4 -20.529 37.0209  -2
  -3  11   1 -20.529 37.0209   1
   2 -11   5 383.176 36.5052  -2
  -2  11   1 383.176 36.5052   1
   1 -11   5 181.839 39.5678  -2
  -1  11   1 181.839 39.5678   1
   0 -11   6 171.323 49.9755  -2
   0  11   1 171.323 49.9755   1
  -1 -11   6 414.258 43.7333  -2
   1  11   1 414.258 43.7333   1
   2  11   1 -10.912 29.2797   1
   1 -12   2 37.6005 34.9912   1
  -3 -11   4 287.377 57.1143  -2
  -3 -11   2 287.377 57.1143   1
  -2 -11   4 99.6028 69.5546  -2
  -2 -11   2 99.6028 69.5546   1
  -1 -11   3 813.331 44.2138  -2
  -1 -11   2 813.331 44.2138   1
   0 -11   3 45.0713 58.7895  -2
   0 -11   2 45.0713 58.7895   1
   1 -11   2 574.486 42.6527  -2
   1 -11   2 574.486 42.6527   1
   2 -11   2 622.975 40.4769  -2
   2 -11   2 622.975 40.4769   1
   3 -11   1 125.760 51.0350  -2
   3 -11   2 125.760 51.0350   1
   4 -11   1 546.782 62.6852  -2
   4 -11   2 546.782 62.6852   1
  -4 -10   4 -10.108 31.1836  -2
  -4 -10   2 -10.108 31.1836   1
  -3 -10   4 596.148 78.0468  -2
  -3 -10   2 596.148 78.0468   1
  -2 -10   3 624.069 38.1453  -2
  -2 -10   2 624.069 38.1453   1
  -1 -10   3 201.494 56.0106  -2
  -1 -10   2 201.494 56.0106   1
   0 -10   2 39.5382 40.2450  -2
   0 -10   2 39.5382 40.2450   1
   1 -10   2 38.4362 27.7172  -2
   1 -10   2 38.4362 27.7172   1
   2 -10   1 353.237 60.9243  -2
   2 -10   2 353.237 60.9243   1
   3 -10   1 385.575 31.7046  -2
   3 -10   2 385.575 31.7046   1
   4 -10   2 90.6679 17.6715   1
  -5  10   0 433.054 48.5686  -2
   5 -10   2 433.054 48.5686   1
  -5  -9   4 40.0051 34.5828  -2
  -5  -9   2 40.0051 34.5828   1
  -4  -9   4 982.238 62.2994  -2
  -4  -9   2 982.238 62.2994   1
  -3  -9   3 20.5795 27.9998  -2
  -3  -9   2 20.5795 27.9998   1
  -2  -9   3 440.998 35.0156  -2
  -2  -9   2 440.998 35.0156   1
  -1  -9   2 254.268 41.8140  -2
  -1  -9   2 254.268 41.8140   1
   0  -9   2 203.462 23.2811  -2
   0  -9   2 203.462 23.2811   1
   1  -9   2 297.838 19.3631   1
   2  -9   1 829.645 30.6650  -2
   2  -9   2 829.645 30.6650   1
   3  -9   2 89.3342 10.9054   1
  -4   9   0 185.246 16.2194  -2
   4  -9   2 185.246 16.2194   1
   5  -9   2 54.7881 13.2771   1
  -6   9   1 46.7003 30.4918  -2
   6  -9   2 46.7003 30.4918   1
  -6  -8   4 366.165 37.0385  -2
  -6  -8   2 366.165 37.0385   1
  -5  -8   4 191.833 37.6701  -2
  -5  -8   2 191.833 37.6701   1
  -4  -8   3 63.6721 31.8789  -2
  -4  -8   2 63.6721 31.8789   1
  -3  -8   3 959.055 40.2383  -2
  -3  -8   2 959.055 40.2383   1
  -2  -8   2 1619.73 79.1170  -2
  -2  -8   2 1619.73 79.1170   1
  -1  -8   2 -14.155 19.8660  -2
  -1  -8   2 -14.155 19.8660   1
   0  -8   1 2133.59 158.513  -2
   0  -8   2 2133.59 158.513   1
   1  -8   1 157.815 14.3305  -2
   1  -8   2 157.815 14.3305   1
   2  -8   2 849.997 22.3698   1
  -3   8   0 966.930 25.3373  -2
   3  -8   2 966.930 25.3373   1
   4  -8   2 90.3191 11.3834   1
  -5   8   1 749.927 32.7388  -2
   5  -8   2 749.927 32.7388   1
  -6   8   1 383.726 46.6297  -2
   6  -8   2 383.726 46.6297   1
  -7  -7   4 407.696 48.3112  -2
  -7  -7   2 407.696 48.3112   1
  -6  -7   4 564.375 41.1021  -2
  -6  -7   2 564.375 41.1021   1
  -5  -7   3 127.775 27.0609  -2
  -5  -7   2 127.775 27.0609   1
  -4  -7   3 1466.54 34.9637  -2
  -4  -7   2 1466.54 34.9637   1
  -3  -7   2 128.741 73.6140  -2
  -3  -7   2 128.741 73.6140   1
  -2  -7   2 1799.63 39.5483  -2
  -2  -7   2 1799.63 39.5483   1
  -1  -7   2 3.94448 6.27191   1
   0  -7   1 385.578 14.7567  -2
   0  -7   2 385.578 14.7567   1
   1  -7   1 666.613 107.865  -2
   1  -7   2 666.613 107.865   1
  -2   7   0 1210.53 29.0813  -2
   2  -7   2 1210.53 29.0813   1
   3  -7   2 226.836 11.9476   1
  -4   7   1 1281.45 27.4867  -2
   4  -7   2 1281.45 27.4867   1
  -5   7   1 66.2976 51.7646  -2
   5  -7   2 66.2976 51.7646   1
  -6   7   2 32.2316 26.6905  -2
   6  -7   2 32.2316 26.6905   1
  -7   7   2 213.378 32.3378  -2
   7  -7   2 213.378 32.3378   1
  -7  -6   4 143.195 34.0626  -2
  -7  -6   2 143.195 34.0626   1
  -6  -6   3 506.317 42.6922  -2
  -6  -6   2 506.317 42.6922   1
  -5  -6   3 502.487 23.8433  -2
  -5  -6   2 502.487 23.8433   1
  -4  -6   2 50.2185 8.08041   1
  -3  -6   2 436.118 15.2258  -2
  -3  -6   2 436.118 15.2258   1
  -2  -6   2 934.870 17.7793   1
  -1  -6   1 41.2527 6.22227  -2
  -1  -6   2 41.2527 6.22227   1
   0  -6   1 2788.92 168.681  -2
   0  -6   2 2788.92 168.681   1
  -1   6   0 117.683 9.30342  -2
   1  -6   2 117.683 9.30342   1
   2  -6   2 197.859 9.06958   1
  -3   6   1 1084.21 23.7361  -2
   3  -6   2 1084.21 23.7361   1
  -4   6   1 64.0823 19.5786  -2
   4  -6   2 64.0823 19.5786   1
  -5   6   2 26.2885 19.8021  -2
   5  -6   2 26.2885 19.8021   1
  -6   6   2 1153.85 39.1595  -2
   6  -6   2 1153.85 39.1595   1
  -7   6   3 168.073 38.2377  -2
   7  -6   2 168.073 38.2377   1
  -7  -5   3 378.929 49.8617  -2
  -7  -5   2 378.929 49.8617   1
  -6  -5   3 215.747 21.5144  -2
  -6  -5   2 215.747 21.5144   1
  -5  -5   2 25.1938 9.74055   1
  -4  -5   2 85.9248 11.6016  -2
  -4  -5   2 85.9248 11.6016   1
  -3  -5   2 862.236 18.0521   1
  -2  -5   1 469.805 10.5707  -2
  -2  -5   2 469.805 10.5707   1
  -1  -5   2 3516.92 49.5664   1
   0   5   0 521.793 13.1502  -2
   0  -5   2 521.793 13.1502   1
  -1   5   0 2684.69 162.318  -2
   1  -5   2 2684.69 162.318   1
  -2   5   1 2164.89 33.5185  -2
   2  -5   2 2164.89 33.5185   1
  -3   5   1 219.808 29.5041  -2
   3  -5   2 219.808 29.5041   1
  -4   5   2 3183.96 74.9287  -2
   4  -5   2 3183.96 74.9287   1
  -5   5   2 66.1189 18.5452  -2
   5  -5   2 66.1189 18.5452   1
  -6   5   3 630.569 67.0107  -2
   6  -5   2 630.569 67.0107   1
  -7   5   3 267.526 24.1219  -2
   7  -5   2 267.526 24.1219   1
   8  -5   2 126.620 21.8954   1
  -8  -4   3 242.915 61.2473  -2
  -8  -4   2 242.915 61.2473   1
  -7  -4   3 347.396 22.0480  -2
  -7  -4   2 347.396 22.0480   1
  -6  -4   2 114.935 12.3572   1
  -5  -4   2 2392.04 42.9563  -2
  -5  -4   2 2392.04 42.9563   1
  -4  -4   2 167.327 9.84268   1
  -3  -4   1 3681.39 63.1098  -2
  -3  -4   2 3681.39 63.1098   1
  -2  -4   2 122.569 5.18542   1
   1   4   0 2627.01 43.2519  -2
  -1  -4   2 2627.01 43.2519   1
   0   4   0 189.639 45.3750  -2
   0  -4   2 189.639 45.3750   1
  -1   4   1 565.648 40.4333  -2
   1  -4   2 565.648 40.4333   1
  -2   4   1 2433.10 66.6936  -2
   2  -4   2 2433.10 66.6936   1
   3  -4   2 855.259 14.9147   1
  -4   4   2 182.860 11.6013  -2
   4  -4   2 182.860 11.6013   1
   5  -4   2 528.179 16.6108   1
  -6   4   3 342.192 18.6310  -2
   6  -4   2 342.192 18.6310   1
   7  -4   2 42.5718 12.9064   1
  -8   4   4 485.064 30.2290  -2
   8  -4   2 485.064 30.2290   1
  -8  -3   3 101.477 22.0030  -2
  -8  -3   2 101.477 22.0030   1
  -7  -3   2 321.238 18.1267   1
  -6  -3   2 647.190 24.1297  -2
  -6  -3   2 647.190 24.1297   1
  -5  -3   2 505.886 15.9475   1
  -4  -3   1 1693.58 34.1510  -2
  -4  -3   2 1693.58 34.1510   1
  -3  -3   1 111.366 49.2031  -2
  -3  -3   2 111.366 49.2031   1
   2   3   0 1129.07 28.7411  -2
  -2  -3   2 1129.07 28.7411   1
  -1  -3   2 561.851 9.76506   1
   0   3   1 -15.033 41.8306  -2
   0  -3   2 -15.033 41.8306   1
  -1   3   1 1786.11 33.7982  -2
   1  -3   2 1786.11 33.7982   1
   2  -3   2 137.010 5.20274   1
  -3   3   2 1430.96 21.7464  -2
   3  -3   2 1430.96 21.7464   1
   4  -3   2 97.8934 6.16616   1
  -5   3   3 472.625 15.1057  -2
   5  -3   2 472.625 15.1057   1
   6  -3   2 4.15417 9.92390   1
  -7   3   4 883.952 29.2239  -2
   7  -3   2 883.952 29.2239   1
   8  -3   2 22.6111 14.6851   1
  -8  -2   2 306.213 21.2961   1
  -7  -2   2 157.409 20.3502  -2
  -7  -2   2 157.409 20.3502   1
  -6  -2   2 196.204 11.3926   1
  -5  -2   1 1336.37 33.7602  -2
  -5  -2   2 1336.37 33.7602   1
  -4  -2   1 113.283 34.3715  -2
  -4  -2   2 113.283 34.3715   1
   3   2   0 1203.62 35.8602  -2
  -3  -2   2 1203.62 35.8602   1
   2   2   0 1204.84 40.0447  -2
  -2  -2   2 1204.84 40.0447   1
  -1  -2   2 1608.40 23.0465   1
   0   2   1 7656.75 132.156  -2
   0  -2   2 7656.75 132.156   1
   1  -2   2 950.197 14.7636   1
  -2   2   2 2056.18 27.3878  -2
   2  -2   2 2056.18 27.3878   1
   3  -2   2 4387.81 55.2146   1
  -4   2   3 498.621 10.9774  -2
   4  -2   2 498.621 10.9774   1
   5  -2   2 1944.29 31.7586   1
  -6   2   4 31.8350 13.3905  -2
   6  -2   2 31.8350 13.3905   1
   7  -2   2 553.349 26.3248   1
  -8   2   5 323.606 31.2718  -2
   8  -2   2 323.606 31.2718   1
  -9  -1   2 193.849 57.1008   1
  -8  -1   2 53.3194 25.5904  -2
  -8  -1   2 53.3194 25.5904   1
  -7  -1   2 444.513 101.958  -2
  -7  -1   2 444.513 101.958   1
  -6  -1   1 1006.20 29.4075  -2
  -6  -1   2 1006.20 29.4075   1
  -5  -1   1 663.179 39.9054  -2
  -5  -1   2 663.179 39.9054   1
   4   1   0 4792.71 202.052  -2
  -4  -1   2 4792.71 202.052   1
   3   1   0 97.5728 9.82570  -2
  -3  -1   2 97.5728 9.82570   1
  -2  -1   2 2446.48 33.9283   1
   1   1   1 7685.05 158.183  -2
  -1  -1   2 7685.05 158.183   1
   0  -1   2 984.651 14.0712   1
  -1   1   2 9391.68 122.759  -2
   1  -1   2 9391.68 122.759   1
   2  -1   2 182.110 4.86768   1
  -3   1   3 1905.25 27.0971  -2
   3  -1   2 1905.25 27.0971   1
   4  -1   2 1147.95 20.0453   1
  -5   1   4 926.485 21.1178  -2
   5  -1   2 926.485 21.1178   1
  -6   1   4 166.001 63.7792  -2
   6  -1   2 166.001 63.7792   1
  -7   1   5 447.550 30.7790  -2
   7  -1   2 447.550 30.7790   1
  -8   1   5 47.0568 33.3095  -2
   8  -1   2 47.0568 33.3095   1
  -8   0   2 189.326 37.9724  -2
  -8   0   2 189.326 37.9724   1
  -7   0   1 86.6373 24.4118  -2
  -7   0   2 86.6373 24.4118   1
  -6   0   1 776.277 31.0124  -2
  -6   0   2 776.277 31.0124   1
   5   0   0 339.727 56.4631  -2
  -5   0   2 339.727 56.4631   1
   4   0   0 156.892 10.7168  -2
  -4   0   2 156.892 10.7168   1
  -3   0   2 107.736 5.06238   1
   2   0   1 1627.93 24.0930  -2
  -2   0   2 1627.93 24.0930   1
  -1   0   2 3.33070 2.08896   1
   0   0   2 9471.73 112.672  -2
   0   0   2 9471.73 112.672   1
   1   0   2 66.3278 3.52550   1
  -2   0   3 1964.13 27.1512  -2
   2   0   2 1964.13 27.1512   1
   3   0   2 16.3694 3.57798   1
  -4   0   4 23.4672 8.15683  -2
   4   0   2 23.4672 8.15683   1
  -5   0   4 254.717 37.8856  -2
   5   0   2 254.717 37.8856   1
  -6   0   5 852.729 24.7039  -2
   6   0   2 852.729 24.7039   1
  -7   0   5 134.682 22.6207  -2
   7   0   2 134.682 22.6207   1
  -8   0   6 555.521 38.8354  -2
   8   0   2 555.521 38.8354   1
  -9   1   2 111.469 56.1001   1
  -8   1   1 25.9053 33.3289  -2
  -8   1   2 25.9053 33.3289   1
  -7   1   1 441.905 29.8101  -2
  -7   1   2 441.905 29.8101   1
  -6   1   2 13.9967 8.01231   1
  -5   1   0 545.286 16.7909  -2
  -5   1   2 545.286 16.7909   1
  -4   1   2 39.1298 4.89838   1
   3  -1   1 1525.95 25.2145  -2
  -3   1   2 1525.95 25.2145   1
  -2   1   2 374.989 7.17858   1
   1  -1   2 9999.99 119.236  -2
  -1   1   2 9999.99 119.236   1
   0   1   2 18.5670 2.21693   1
  -1  -1   3 2665.19 41.2849  -2
   1   1   2 2665.19 41.2849   1
   2   1   2 1259.92 18.1846   1
  -3  -1   4 376.402 11.3669  -2
   3   1   2 376.402 11.3669   1
  -4  -1   4 1196.29 61.7397  -2
   4   1   2 1196.29 61.7397   1
  -5  -1   5 554.579 21.6836  -2
   5   1   2 554.579 21.6836   1
  -6  -1   5 1484.86 32.6227  -2
   6   1   2 1484.86 32.6227   1
  -7  -1   6 401.812 66.8102  -2
   7   1   2 401.812 66.8102   1
  -8  -1   6 301.833 40.3529  -2
   8   1   2 301.833 40.3529   1
  -9   2   2 1.72503 59.0880   1
  -8   2   1 810.280 42.0177  -2
  -8   2   2 810.280 42.0177   1
  -7   2   2 190.866 14.4962   1
  -6   2   0 186.962 16.9332  -2
  -6   2   2 186.962 16.9332   1
  -5   2   2 2078.65 33.2957   1
   4  -2   1 350.390 9.24555  -2
  -4   2   2 350.390 9.24555   1
  -3   2   2 4447.15 53.5702   1
   2  -2   2 1645.84 24.7482  -2
  -2   2   2 1645.84 24.7482   1
  -1   2   2 4883.73 57.7784   1
   0  -2   3 13.5560 9.74773  -2
   0   2   2 13.5560 9.74773   1
   1   2   2 264.442 5.75349   1
  -2  -2   4 1685.80 46.3057  -2
   2   2   2 1685.80 46.3057   1
  -3  -2   4 902.429 23.6343  -2
   3   2   2 902.429 23.6343   1
  -4  -2   5 809.713 62.9262  -2
   4   2   2 809.713 62.9262   1
  -5  -2   5 1162.23 26.4627  -2
   5   2   2 1162.23 26.4627   1
   6   2   2 10.4368 8.25061   1
  -7  -2   6 13.2800 21.5154  -2
   7   2   2 13.2800 21.5154   1
   8   2   2 109.332 24.1743   1
  -8   3   2 137.703 18.3869   1
  -7   3   0 1031.89 31.3243  -2
  -7   3   2 1031.89 31.3243   1
  -6   3   2 100.044 10.3320   1
   5  -3   1 676.317 17.3503  -2
  -5   3   2 676.317 17.3503   1
  -4   3   2 837.870 14.9100   1
   3  -3   2 1014.44 15.5086  -2
  -3   3   2 1014.44 15.5086   1
  -2   3   2 95.8052 4.62327   1
   1  -3   3 844.947 17.6929  -2
  -1   3   2 844.947 17.6929   1
   0   3   2 666.298 12.8036   1
  -1  -3   4 2467.80 113.898  -2
   1   3   2 2467.80 113.898   1
  -2  -3   4 1095.61 22.1498  -2
   2   3   2 1095.61 22.1498   1
  -3  -3   5 1089.61 70.4414  -2
   3   3   2 1089.61 70.4414   1
  -4  -3   5 268.733 12.9799  -2
   4   3   2 268.733 12.9799   1
   5   3   2 3.62968 7.06592   1
  -6  -3   6 146.410 16.7953  -2
   6   3   2 146.410 16.7953   1
   7   3   2 335.966 22.7950   1
  -8  -3   7 -9.1291 46.7474  -2
   8   3   2 -9.1291 46.7474   1
  -8   4   0 778.452 38.2069  -2
  -8   4   2 778.452 38.2069   1
  -7   4   2 38.9282 10.1642   1
   6  -4   1 465.858 21.1352  -2
  -6   4   2 465.858 21.1352   1
  -5   4   2 16.9571 6.45585   1
   4  -4   2 137.430 11.2635  -2
  -4   4   2 137.430 11.2635   1
  -3   4   2 945.904 15.6164   1
   2  -4   3 2899.96 91.9656  -2
  -2   4   2 2899.96 91.9656   1
   1  -4   3 497.312 26.0285  -2
  -1   4   2 497.312 26.0285   1
   0   4   2 1216.31 17.7324   1
  -1  -4   4 892.420 18.0522  -2
   1   4   2 892.420 18.0522   1
   2   4   2 656.454 13.6836   1
  -3  -4   5 2184.88 42.4273  -2
   3   4   2 2184.88 42.4273   1
   4   4   2 46.2075 8.40613   1
  -5  -4   6 2503.05 58.9410  -2
   5   4   2 2503.05 58.9410   1
   6   4   2 20.4374 12.9036   1
  -7  -4   7 394.925 32.9806  -2
   7   4   2 394.925 32.9806   1
  -8   5   2 -1.8395 16.6989   1
   7  -5   1 250.338 25.9526  -2
  -7   5   2 250.338 25.9526   1
  -6   5   2 643.875 26.7118   1
   5  -5   2 53.6265 20.0483  -2
  -5   5   2 53.6265 20.0483   1
   4  -5   2 3097.26 152.345  -2
  -4   5   2 3097.26 152.345   1
   3  -5   3 492.925 24.4155  -2
  -3   5   2 492.925 24.4155   1
   2  -5   3 2518.14 52.7746  -2
  -2   5   2 2518.14 52.7746   1
   1  -5   4 735.427 42.4810  -2
  -1   5   2 735.427 42.4810   1
   0  -5   4 376.107 10.2016  -2
   0   5   2 376.107 10.2016   1
   1   5   2 2484.68 37.5679   1
  -2  -5   5 1465.62 27.5305  -2
   2   5   2 1465.62 27.5305   1
   3   5   2 1055.83 26.4800   1
  -4  -5   6 202.759 16.8458  -2
   4   5   2 202.759 16.8458   1
   5   5   2 -1.2727 11.4084   1
  -6  -5   7 -39.887 25.9227  -2
   6   5   2 -39.887 25.9227   1
  -7  -5   7 166.444 42.7857  -2
   7   5   2 166.444 42.7857   1
   7  -6   1 243.646 57.2481  -2
  -7   6   2 243.646 57.2481   1
   6  -6   2 1131.53 40.9111  -2
  -6   6   2 1131.53 40.9111   1
   5  -6   2 34.3799 21.9393  -2
  -5   6   2 34.3799 21.9393   1
   4  -6   3 483.862 33.5787  -2
  -4   6   2 483.862 33.5787   1
   3  -6   3 567.962 20.9504  -2
  -3   6   2 567.962 20.9504   1
  -2   6   2 289.405 11.8206   1
   1  -6   4 61.9126 12.5072  -2
  -1   6   2 61.9126 12.5072   1
   0   6   2 1564.55 26.3119   1
  -1  -6   5 62.2058 7.02319  -2
   1   6   2 62.2058 7.02319   1
   2   6   2 837.418 22.3165   1
  -3  -6   6 770.598 26.1928  -2
   3   6   2 770.598 26.1928   1
   4   6   2 15.7967 11.5240   1
  -5  -6   7 36.0710 27.5795  -2
   5   6   2 36.0710 27.5795   1
  -6  -6   7 705.751 49.5831  -2
   6   6   2 705.751 49.5831   1
   7  -7   2 304.674 38.6648  -2
  -7   7   2 304.674 38.6648   1
   6  -7   2 14.2142 25.4316  -2
  -6   7   2 14.2142 25.4316   1
  -5   7   2 170.318 14.5013   1
   4  -7   3 477.578 21.0892  -2
  -4   7   2 477.578 21.0892   1
  -3   7   2 34.2816 10.3662   1
   2  -7   4 1180.54 30.5944  -2
  -2   7   2 1180.54 30.5944   1
  -1   7   2 696.902 21.7749   1
   0  -7   5 104.495 13.6951  -2
   0   7   2 104.495 13.6951   1
   1   7   2 359.467 16.6031   1
  -2  -7   6 1205.91 35.4175  -2
   2   7   2 1205.91 35.4175   1
   3   7   2 61.3433 11.0443   1
  -4  -7   7 1365.48 47.9758  -2
   4   7   2 1365.48 47.9758   1
  -5  -7   7 147.353 38.7246  -2
   5   7   2 147.353 38.7246   1
  -6  -7   8 627.044 62.3168  -2
   6   7   2 627.044 62.3168   1
   6  -8   3 178.142 62.5177  -2
  -6   8   2 178.142 62.5177   1
   5  -8   3 712.187 41.4078  -2
  -5   8   2 712.187 41.4078   1
  -4   8   2 5.20644 11.8823   1
   3  -8   4 1436.76 43.6212  -2
  -3   8   2 1436.76 43.6212   1
  -2   8   2 76.6139 12.7837   1
   1  -8   5 1045.00 32.6004  -2
  -1   8   2 1045.00 32.6004   1
   0   8   2 653.173 25.8060   1
  -1  -8   6 81.1949 19.7310  -2
   1   8   2 81.1949 19.7310   1
  -2  -8   6 879.088 103.179  -2
   2   8   2 879.088 103.179   1
  -3  -8   7 267.339 31.2109  -2
   3   8   2 267.339 31.2109   1
  -4  -8   7 228.827 35.0002  -2
   4   8   2 228.827 35.0002   1
  -5  -8   8 0.75366 47.2945  -2
   5   8   2 0.75366 47.2945   1
   6  -9   3 168.819 43.1405  -2
  -6   9   2 168.819 43.1405   1
  -5   9   2 340.811 26.2748   1
   4  -9   4 48.4741 20.0255  -2
  -4   9   2 48.4741 20.0255   1
  -3   9   2 2.99901 13.4718   1
   2  -9   5 274.525 25.5115  -2
  -2   9   2 274.525 25.5115   1
  -1   9   2 107.556 14.2882   1
   0  -9   6 131.315 28.6134  -2
   0   9   2 131.315 28.6134   1
  -1  -9   6 366.129 43.2323  -2
   1   9   2 366.129 43.2323   1
  -2  -9   7 123.771 29.3751  -2
   2   9   2 123.771 29.3751   1
  -3  -9   7 260.470 37.8684  -2
   3   9   2 260.470 37.8684   1
  -4  -9   8 372.356 101.415  -2
   4   9   2 372.356 101.415   1
  -4  10   2 23.3823 16.3540   1
   3 -10   5 316.880 34.6598  -2
  -3  10   2 316.880 34.6598   1
   2 -10   5 287.706 43.4351  -2
  -2  10   2 287.706 43.4351   1
   1 -10   6 321.771 31.3964  -2
  -1  10   2 321.771 31.3964   1
   0 -10   6 85.8000 35.9737  -2
   0  10   2 85.8000 35.9737   1
  -1 -10   7 145.087 50.7331  -2
   1  10   2 145.087 50.7331   1
  -2 -10   7 102.064 29.7545  -2
   2  10   2 102.064 29.7545   1
   3  10   2 349.399 29.9465   1
   2 -11   6 303.160 44.0662  -2
  -2  11   2 303.160 44.0662   1
   1 -11   6 855.218 51.0566  -2
  -1  11   2 855.218 51.0566   1
   0 -11   7 141.703 47.4017  -2
   0  11   2 141.703 47.4017   1
  -1 -11   7 514.818 55.6724  -2
   1  11   2 514.818 55.6724   1
   2  11   2 17.5123 34.8233   1
   0 -12   2 129.180 83.1036  -2
   0 -12   3 129.180 83.1036   1
   1 -12   3 -44.309 40.1551   1
  -3 -11   3 64.5571 30.0713  -2
  -3 -11   3 64.5571 30.0713   1
  -2 -11   3 75.2139 24.1752   1
  -1 -11   2 651.127 42.0997  -2
  -1 -11   3 651.127 42.0997   1
   0 -11   2 32.3413 58.7393  -2
   0 -11   3 32.3413 58.7393   1
   1 -11   1 310.231 38.9341  -2
   1 -11   3 310.231 38.9341   1
   2 -11   1 345.601 35.8839  -2
   2 -11   3 345.601 35.8839   1
  -3  11   0 93.9833 42.4695  -2
   3 -11   3 93.9833 42.4695   1
  -4 -10   3 82.9361 26.8054  -2
  -4 -10   3 82.9361 26.8054   1
  -3 -10   3 366.908 73.2779  -2
  -3 -10   3 366.908 73.2779   1
  -2 -10   2 907.343 46.0427  -2
  -2 -10   3 907.343 46.0427   1
  -1 -10   2 189.214 44.1665  -2
  -1 -10   3 189.214 44.1665   1
   0 -10   1 1396.48 63.4692  -2
   0 -10   3 1396.48 63.4692   1
   1 -10   1 58.4424 27.5711  -2
   1 -10   3 58.4424 27.5711   1
   2 -10   3 534.251 27.1898   1
  -3  10   0 803.588 36.2580  -2
   3 -10   3 803.588 36.2580   1
   4 -10   3 64.9049 17.7832   1
  -5  10   1 234.354 45.4298  -2
   5 -10   3 234.354 45.4298   1
  -5  -9   3 102.570 33.9299  -2
  -5  -9   3 102.570 33.9299   1
  -4  -9   3 418.352 50.8712  -2
  -4  -9   3 418.352 50.8712   1
  -3  -9   2 29.7940 28.9740  -2
  -3  -9   3 29.7940 28.9740   1
  -2  -9   2 565.254 37.6472  -2
  -2  -9   3 565.254 37.6472   1
  -1  -9   1 701.404 46.2033  -2
  -1  -9   3 701.404 46.2033   1
   0  -9   1 180.945 19.3428  -2
   0  -9   3 180.945 19.3428   1
   1  -9   3 170.865 13.8883   1
  -2   9   0 239.707 19.1967  -2
   2  -9   3 239.707 19.1967   1
   3  -9   3 -2.2211 9.45235   1
  -4   9   1 612.756 22.6450  -2
   4  -9   3 612.756 22.6450   1
   5  -9   3 57.5068 14.9382   1
  -6   9   2 142.027 39.8784  -2
   6  -9   3 142.027 39.8784   1
  -6  -8   3 58.1561 35.4590  -2
  -6  -8   3 58.1561 35.4590   1
  -5  -8   3 873.964 56.0153  -2
  -5  -8   3 873.964 56.0153   1
  -4  -8   2 23.1642 25.1146  -2
  -4  -8   3 23.1642 25.1146   1
  -3  -8   2 1271.21 41.3823  -2
  -3  -8   3 1271.21 41.3823   1
  -2  -8   1 324.501 33.1013  -2
  -2  -8   3 324.501 33.1013   1
  -1  -8   1 276.996 19.6865  -2
  -1  -8   3 276.996 19.6865   1
   0   8   0 268.797 94.6118  -2
   0  -8   3 268.797 94.6118   1
  -1   8   0 571.609 20.4702  -2
   1  -8   3 571.609 20.4702   1
   2  -8   3 39.8066 8.72642   1
  -3   8   1 1272.44 30.5375  -2
   3  -8   3 1272.44 30.5375   1
   4  -8   3 40.0487 10.4973   1
  -5   8   2 641.120 31.0711  -2
   5  -8   3 641.120 31.0711   1
  -6   8   2 111.318 60.1120  -2
   6  -8   3 111.318 60.1120   1
  -7  -7   3 110.238 53.7234  -2
  -7  -7   3 110.238 53.7234   1
  -6  -7   3 803.716 34.4380  -2
  -6  -7   3 803.716 34.4380   1
  -5  -7   2 90.3052 30.0458  -2
  -5  -7   3 90.3052 30.0458   1
  -4  -7   2 1297.57 29.9845  -2
  -4  -7   3 1297.57 29.9845   1
  -3  -7   1 575.391 94.8667  -2
  -3  -7   3 575.391 94.8667   1
  -2  -7   1 202.838 16.8346  -2
  -2  -7   3 202.838 16.8346   1
   1   7   0 1497.66 117.702  -2
  -1  -7   3 1497.66 117.702   1
   0   7   0 260.590 13.1899  -2
   0  -7   3 260.590 13.1899   1
  -1   7   0 2292.42 164.145  -2
   1  -7   3 2292.42 164.145   1
  -2   7   1 606.249 17.7181  -2
   2  -7   3 606.249 17.7181   1
   3  -7   3 744.512 21.6052   1
  -4   7   2 524.259 21.1587  -2
   4  -7   3 524.259 21.1587   1
  -5   7   2 136.266 32.4897  -2
   5  -7   3 136.266 32.4897   1
  -6   7   3 402.556 33.0505  -2
   6  -7   3 402.556 33.0505   1
  -7   7   3 148.578 52.4227  -2
   7  -7   3 148.578 52.4227   1
  -7  -6   3 149.687 31.4965  -2
  -7  -6   3 149.687 31.4965   1
  -6  -6   2 652.757 51.9157  -2
  -6  -6   3 652.757 51.9157   1
  -5  -6   2 551.580 20.6888  -2
  -5  -6   3 551.580 20.6888   1
  -4  -6   3 254.429 11.7296   1
  -3  -6   1 1377.18 27.9900  -2
  -3  -6   3 1377.18 27.9900   1
   2   6   0 1729.72 126.801  -2
  -2  -6   3 1729.72 126.801   1
   1   6   0 580.394 13.8452  -2
  -1  -6   3 580.394 13.8452   1
   0   6   0 3513.24 200.811  -2
   0  -6   3 3513.24 200.811   1
  -1   6   1 333.586 12.0312  -2
   1  -6   3 333.586 12.0312   1
   2  -6   3 29.0454 6.05558   1
  -3   6   2 670.275 20.1432  -2
   3  -6   3 670.275 20.1432   1
  -4   6   2 338.232 27.0031  -2
   4  -6   3 338.232 27.0031   1
  -5   6   3 855.546 32.4912  -2
   5  -6   3 855.546 32.4912   1
  -6   6   3 333.364 29.0648  -2
   6  -6   3 333.364 29.0648   1
  -7   6   4 191.723 52.2952  -2
   7  -6   3 191.723 52.2952   1
  -7  -5   2 161.191 61.1027  -2
  -7  -5   3 161.191 61.1027   1
  -6  -5   2 297.779 23.1186  -2
  -6  -5   3 297.779 23.1186   1
  -5  -5   3 60.5802 9.70974   1
  -4  -5   1 1856.08 34.5372  -2
  -4  -5   3 1856.08 34.5372   1
  -3  -5   3 46.4117 6.09879   1
   2   5   0 465.717 12.7542  -2
  -2  -5   3 465.717 12.7542   1
   1   5   0 1228.73 93.8541  -2
  -1  -5   3 1228.73 93.8541   1
   0   5   1 745.260 16.1749  -2
   0  -5   3 745.260 16.1749   1
  -1   5   1 2398.61 143.037  -2
   1  -5   3 2398.61 143.037   1
  -2   5   2 2171.53 30.8401  -2
   2  -5   3 2171.53 30.8401   1
  -3   5   2 430.638 19.2485  -2
   3  -5   3 430.638 19.2485   1
  -4   5   3 1275.02 38.0811  -2
   4  -5   3 1275.02 38.0811   1
  -5   5   3 515.028 24.9281  -2
   5  -5   3 515.028 24.9281   1
  -6   5   4 210.620 60.1968  -2
   6  -5   3 210.620 60.1968   1
  -7   5   4 639.095 33.2293  -2
   7  -5   3 639.095 33.2293   1
  -8  -4   2 186.334 65.8574  -2
  -8  -4   3 186.334 65.8574   1
  -7  -4   2 366.002 21.6683  -2
  -7  -4   3 366.002 21.6683   1
  -6  -4   3 280.375 14.8074   1
  -5  -4   1 291.024 12.7419  -2
  -5  -4   3 291.024 12.7419   1
  -4  -4   3 0.14878 6.11967   1
   3   4   0 1701.06 27.5076  -2
  -3  -4   3 1701.06 27.5076   1
   2   4   0 1974.29 120.503  -2
  -2  -4   3 1974.29 120.503   1
   1   4   1 272.991 10.1455  -2
  -1  -4   3 272.991 10.1455   1
   0   4   1 9231.05 294.971  -2
   0  -4   3 9231.05 294.971   1
  -1   4   2 433.976 23.4678  -2
   1  -4   3 433.976 23.4678   1
  -2   4   2 3736.67 62.8891  -2
   2  -4   3 3736.67 62.8891   1
   3  -4   3 314.887 8.52679   1
  -4   4   3 661.831 15.5478  -2
   4  -4   3 661.831 15.5478   1
   5  -4   3 549.370 17.9610   1
  -6   4   4 621.385 24.3337  -2
   6  -4   3 621.385 24.3337   1
   7  -4   3 410.001 21.6170   1
  -8  -3   2 62.8783 21.7885  -2
  -8  -3   3 62.8783 21.7885   1
  -7  -3   3 889.416 27.8854   1
  -6  -3   1 146.006 14.0050  -2
  -6  -3   3 146.006 14.0050   1
  -5  -3   3 389.304 13.8392   1
   4   3   0 2697.97 46.0340  -2
  -4  -3   3 2697.97 46.0340   1
   3   3   0 1296.93 93.5783  -2
  -3  -3   3 1296.93 93.5783   1
   2   3   1 5909.28 116.076  -2
  -2  -3   3 5909.28 116.076   1
   1   3   1 102.665 26.5677  -2
  -1  -3   3 102.665 26.5677   1
   0   3   2 2910.72 99.9804  -2
   0  -3   3 2910.72 99.9804   1
  -1   3   2 676.417 13.6730  -2
   1  -3   3 676.417 13.6730   1
   2  -3   3 241.342 7.12602   1
  -3   3   3 47.6653 7.99681  -2
   3  -3   3 47.6653 7.99681   1
   4  -3   3 1604.11 24.4521   1
  -5   3   4 123.378 11.3081  -2
   5  -3   3 123.378 11.3081   1
   6  -3   3 564.774 20.4829   1
  -7   3   5 235.860 20.7623  -2
   7  -3   3 235.860 20.7623   1
  -8   3   5 137.559 72.3918  -2
   8  -3   3 137.559 72.3918   1
  -8  -2   3 27.5958 14.2773   1
  -7  -2   1 140.003 17.8959  -2
  -7  -2   3 140.003 17.8959   1
  -6  -2   3 199.264 12.6955   1
   5   2   0 1072.49 27.8839  -2
  -5  -2   3 1072.49 27.8839   1
   4   2   0 139.615 60.7840  -2
  -4  -2   3 139.615 60.7840   1
   3   2   1 2695.02 65.3287  -2
  -3  -2   3 2695.02 65.3287   1
   2   2   1 486.228 25.9832  -2
  -2  -2   3 486.228 25.9832   1
   1   2   2 1491.01 89.0317  -2
  -1  -2   3 1491.01 89.0317   1
   0   2   2 38.9632 7.56046  -2
   0  -2   3 38.9632 7.56046   1
   1  -2   3 1855.15 27.0378   1
  -2   2   3 3005.27 38.7728  -2
   2  -2   3 3005.27 38.7728   1
   3  -2   3 1217.15 17.1286   1
  -4   2   4 219.338 10.1934  -2
   4  -2   3 219.338 10.1934   1
   5  -2   3 76.2768 8.46804   1
  -6   2   5 1034.05 26.1670  -2
   6  -2   3 1034.05 26.1670   1
   7  -2   3 78.5596 14.7026   1
  -8   2   6 889.845 40.3754  -2
   8  -2   3 889.845 40.3754   1
  -8  -1   1 3.10554 24.0767  -2
  -8  -1   3 3.10554 24.0767   1
  -7  -1   3 330.148 17.8346   1
   6   1   0 736.140 28.3247  -2
  -6  -1   3 736.140 28.3247   1
   5   1   0 102.143 35.6036  -2
  -5  -1   3 102.143 35.6036   1
   4   1   1 777.442 63.1535  -2
  -4  -1   3 777.442 63.1535   1
   3   1   1 3385.43 66.9249  -2
  -3  -1   3 3385.43 66.9249   1
  -2  -1   3 2.64182 3.03293   1
   1   1   2 3247.76 49.3068  -2
  -1  -1   3 3247.76 49.3068   1
   0  -1   3 99.3099 4.96115   1
  -1   1   3 2201.51 32.6536  -2
   1  -1   3 2201.51 32.6536   1
   2  -1   3 1358.50 18.4840   1
  -3   1   4 2254.43 35.5375  -2
   3  -1   3 2254.43 35.5375   1
   4  -1   3 1477.34 26.4920   1
  -5   1   5 70.7880 13.5089  -2
   5  -1   3 70.7880 13.5089   1
  -6   1   5 1440.56 68.0715  -2
   6  -1   3 1440.56 68.0715   1
  -7   1   6 250.766 28.7614  -2
   7  -1   3 250.766 28.7614   1
  -8   1   6 139.637 32.0238  -2
   8  -1   3 139.637 32.0238   1
  -8   0   1 565.697 43.6112  -2
  -8   0   3 565.697 43.6112   1
   7   0   0 374.829 28.5458  -2
  -7   0   3 374.829 28.5458   1
   6   0   0 1065.75 35.7986  -2
  -6   0   3 1065.75 35.7986   1
   5   0   1 3281.97 164.252  -2
  -5   0   3 3281.97 164.252   1
   4   0   1 427.388 12.8429  -2
  -4   0   3 427.388 12.8429   1
  -3   0   3 2737.51 37.3866   1
   2   0   2 1464.99 20.1461  -2
  -2   0   3 1464.99 20.1461   1
  -1   0   3 487.349 7.80859   1
   0   0   3 172.653 5.55965  -2
   0   0   3 172.653 5.55965   1
   1   0   3 22.6161 2.84151   1
  -2   0   4 2039.59 28.4898  -2
   2   0   3 2039.59 28.4898   1
   3   0   3 491.436 11.2846   1
  -4   0   5 404.822 15.0428  -2
   4   0   3 404.822 15.0428   1
  -5   0   5 640.682 25.9735  -2
   5   0   3 640.682 25.9735   1
  -6   0   6 232.183 20.3362  -2
   6   0   3 232.183 20.3362   1
  -7   0   6 354.440 27.2493  -2
   7   0   3 354.440 27.2493   1
  -8   0   7 452.300 45.2951  -2
   8   0   3 452.300 45.2951   1
  -8   1   0 51.4801 34.2542  -2
  -8   1   3 51.4801 34.2542   1
  -7   1   0 792.402 34.3671  -2
  -7   1   3 792.402 34.3671   1
  -6   1   3 306.848 14.8020   1
   5  -1   1 296.998 14.2964  -2
  -5   1   3 296.998 14.2964   1
  -4   1   3 830.852 15.5528   1
   3  -1   2 1584.11 26.2913  -2
  -3   1   3 1584.11 26.2913   1
  -2   1   3 759.291 12.5979   1
   1  -1   3 1640.67 22.6214  -2
  -1   1   3 1640.67 22.6214   1
   0   1   3 6.51748 2.57200   1
  -1  -1   4 3381.01 52.4432  -2
   1   1   3 3381.01 52.4432   1
   2   1   3 299.316 7.48506   1
  -3  -1   5 937.454 19.4177  -2
   3   1   3 937.454 19.4177   1
  -4  -1   5 715.351 26.0109  -2
   4   1   3 715.351 26.0109   1
  -5  -1   6 232.237 21.2093  -2
   5   1   3 232.237 21.2093   1
  -6  -1   6 258.463 18.8211  -2
   6   1   3 258.463 18.8211   1
   7   1   3 436.708 19.7623   1
  -8  -1   7 104.860 58.3916  -2
   8   1   3 104.860 58.3916   1
  -8   2   0 224.459 31.9093  -2
  -8   2   3 224.459 31.9093   1
  -7   2   3 189.561 16.0500   1
   6  -2   1 982.610 26.7148  -2
  -6   2   3 982.610 26.7148   1
  -5   2   3 219.496 10.0031   1
   4  -2   2 415.380 11.7385  -2
  -4   2   3 415.380 11.7385   1
  -3   2   3 -1.5043 3.49035   1
   2  -2   3 3402.92 44.8768  -2
  -2   2   3 3402.92 44.8768   1
  -1   2   3 429.955 7.83995   1
   0  -2   4 6978.71 108.263  -2
   0   2   3 6978.71 108.263   1
   1   2   3 110.871 4.17505   1
  -2  -2   5 4794.35 82.8717  -2
   2   2   3 4794.35 82.8717   1
  -3  -2   5 3719.11 63.0309  -2
   3   2   3 3719.11 63.0309   1
  -4  -2   6 442.368 28.4188  -2
   4   2   3 442.368 28.4188   1
  -5  -2   6 1144.56 26.3166  -2
   5   2   3 1144.56 26.3166   1
   6   2   3 0.38656 9.01989   1
  -7  -2   7 647.507 34.5418  -2
   7   2   3 647.507 34.5418   1
   8   2   3 -14.316 28.8462   1
  -8   3   3 10.8463 14.2561   1
   7  -3   1 772.409 27.7951  -2
  -7   3   3 772.409 27.7951   1
  -6   3   3 247.388 13.3372   1
   5  -3   2 540.335 18.8251  -2
  -5   3   3 540.335 18.8251   1
  -4   3   3 1848.05 29.0005   1
   3  -3   3 55.4692 8.52704  -2
  -3   3   3 55.4692 8.52704   1
  -2   3   3 5566.18 69.0732   1
   1  -3   4 3838.42 56.3565  -2
  -1   3   3 3838.42 56.3565   1
   0  -3   4 1930.07 65.9713  -2
   0   3   3 1930.07 65.9713   1
  -1  -3   5 1268.90 71.0590  -2
   1   3   3 1268.90 71.0590   1
  -2  -3   5 1003.71 18.6504  -2
   2   3   3 1003.71 18.6504   1
  -3  -3   6 108.182 45.5052  -2
   3   3   3 108.182 45.5052   1
  -4  -3   6 1032.98 25.2887  -2
   4   3   3 1032.98 25.2887   1
   5   3   3 13.4403 9.42312   1
  -6  -3   7 393.202 23.6131  -2
   6   3   3 393.202 23.6131   1
   7   3   3 9.86881 15.3459   1
   8  -4   1 193.174 25.9246  -2
  -8   4   3 193.174 25.9246   1
  -7   4   3 28.1909 10.5790   1
   6  -4   2 396.679 21.0798  -2
  -6   4   3 396.679 21.0798   1
  -5   4   3 190.584 11.5785   1
   4  -4   3 484.457 19.9592  -2
  -4   4   3 484.457 19.9592   1
  -3   4   3 1106.31 19.4010   1
   2  -4   4 653.727 17.0520  -2
  -2   4   3 653.727 17.0520   1
   1  -4   4 580.248 19.8047  -2
  -1   4   3 580.248 19.8047   1
   0  -4   5 2628.59 126.577  -2
   0   4   3 2628.59 126.577   1
  -1  -4   5 198.517 10.1939  -2
   1   4   3 198.517 10.1939   1
  -2  -4   6 544.588 56.8913  -2
   2   4   3 544.588 56.8913   1
  -3  -4   6 1727.88 34.5468  -2
   3   4   3 1727.88 34.5468   1
   4   4   3 107.186 10.7309   1
  -5  -4   7 235.626 19.4725  -2
   5   4   3 235.626 19.4725   1
   6   4   3 144.955 17.2120   1
  -7  -4   8 -12.933 32.9155  -2
   7   4   3 -12.933 32.9155   1
  -8   5   3 -9.8115 16.8545   1
   7  -5   2 382.436 28.3201  -2
  -7   5   3 382.436 28.3201   1
  -6   5   3 36.6360 10.9022   1
   5  -5   3 428.329 25.5660  -2
  -5   5   3 428.329 25.5660   1
   4  -5   3 978.284 64.9396  -2
  -4   5   3 978.284 64.9396   1
   3  -5   4 363.694 22.1771  -2
  -3   5   3 363.694 22.1771   1
   2  -5   4 23.1114 10.7196  -2
  -2   5   3 23.1114 10.7196   1
   1  -5   5 1757.22 90.2956  -2
  -1   5   3 1757.22 90.2956   1
   0  -5   5 384.267 11.6780  -2
   0   5   3 384.267 11.6780   1
   1   5   3 1763.24 27.2644   1
  -2  -5   6 565.529 14.5187  -2
   2   5   3 565.529 14.5187   1
   3   5   3 804.207 22.9758   1
  -4  -5   7 1643.54 42.7720  -2
   4   5   3 1643.54 42.7720   1
   5   5   3 35.2234 13.3192   1
  -6  -5   8 588.965 35.9961  -2
   6   5   3 588.965 35.9961   1
   8  -6   2 169.836 72.9214  -2
  -8   6   3 169.836 72.9214   1
   7  -6   2 151.048 57.1003  -2
  -7   6   3 151.048 57.1003   1
   6  -6   3 340.540 28.5685  -2
  -6   6   3 340.540 28.5685   1
   5  -6   3 773.519 32.4109  -2
  -5   6   3 773.519 32.4109   1
  -4   6   3 172.045 16.6772   1
   3  -6   4 2129.41 45.8566  -2
  -3   6   3 2129.41 45.8566   1
  -2   6   3 -2.1217 7.39716   1
   1  -6   5 1347.58 28.2684  -2
  -1   6   3 1347.58 28.2684   1
   0   6   3 139.847 7.45398   1
  -1  -6   6 251.995 8.86310  -2
   1   6   3 251.995 8.86310   1
   2   6   3 273.922 12.7216   1
  -3  -6   7 166.229 16.5773  -2
   3   6   3 166.229 16.5773   1
   4   6   3 141.257 15.5996   1
  -5  -6   8 768.222 40.0032  -2
   5   6   3 768.222 40.0032   1
  -6  -6   8 22.2791 38.9296  -2
   6   6   3 22.2791 38.9296   1
   7  -7   3 226.314 43.7642  -2
  -7   7   3 226.314 43.7642   1
   6  -7   3 305.628 33.4157  -2
  -6   7   3 305.628 33.4157   1
  -5   7   3 235.263 18.8257   1
   4  -7   4 1298.06 39.7963  -2
  -4   7   3 1298.06 39.7963   1
  -3   7   3 222.560 15.5867   1
   2  -7   5 160.369 14.9407  -2
  -2   7   3 160.369 14.9407   1
  -1   7   3 22.5346 8.36386   1
   0  -7   6 347.127 16.8256  -2
   0   7   3 347.127 16.8256   1
   1   7   3 1073.61 28.6752   1
  -2  -7   7 575.855 25.2310  -2
   2   7   3 575.855 25.2310   1
   3   7   3 736.418 33.5629   1
  -4  -7   8 102.700 27.6996  -2
   4   7   3 102.700 27.6996   1
  -5  -7   8 130.032 37.9317  -2
   5   7   3 130.032 37.9317   1
   6  -8   4 484.260 71.0422  -2
  -6   8   3 484.260 71.0422   1
   5  -8   4 254.512 28.4083  -2
  -5   8   3 254.512 28.4083   1
  -4   8   3 50.5736 13.7476   1
   3  -8   5 108.717 17.7687  -2
  -3   8   3 108.717 17.7687   1
  -2   8   3 220.543 16.8992   1
   1  -8   6 84.9067 17.1346  -2
  -1   8   3 84.9067 17.1346   1
   0   8   3 899.632 29.9074   1
  -1  -8   7 199.723 23.2138  -2
   1   8   3 199.723 23.2138   1
  -2  -8   7 705.548 100.532  -2
   2   8   3 705.548 100.532   1
  -3  -8   8 211.185 30.5512  -2
   3   8   3 211.185 30.5512   1
  -4  -8   8 235.373 36.5067  -2
   4   8   3 235.373 36.5067   1
  -5  -8   9 641.429 104.657  -2
   5   8   3 641.429 104.657   1
  -5   9   3 68.9248 18.6308   1
   4  -9   5 1295.17 54.3563  -2
  -4   9   3 1295.17 54.3563   1
  -3   9   3 -0.3639 14.9963   1
   2  -9   6 968.211 36.6258  -2
  -2   9   3 968.211 36.6258   1
  -1   9   3 54.0925 12.7494   1
   0  -9   7 370.353 28.2870  -2
   0   9   3 370.353 28.2870   1
  -1  -9   7 357.199 53.0873  -2
   1   9   3 357.199 53.0873   1
  -2  -9   8 467.594 32.5243  -2
   2   9   3 467.594 32.5243   1
  -3  -9   8 226.364 35.5367  -2
   3   9   3 226.364 35.5367   1
   4   9   3 171.209 79.4769   1
  -4  10   3 32.8102 16.7496   1
   3 -10   6 154.876 26.3789  -2
  -3  10   3 154.876 26.3789   1
   2 -10   6 79.9051 33.2667  -2
  -2  10   3 79.9051 33.2667   1
   1 -10   7 83.5581 28.1862  -2
  -1  10   3 83.5581 28.1862   1
   0 -10   7 745.605 44.4786  -2
   0  10   3 745.605 44.4786   1
  -1 -10   8 51.6951 63.9890  -2
   1  10   3 51.6951 63.9890   1
  -2 -10   8 252.646 41.5155  -2
   2  10   3 252.646 41.5155   1
   2 -11   7 110.841 57.6977  -2
  -2  11   3 110.841 57.6977   1
   0  11   3 -15.928 37.7236   1
  -1 -12   4 127.159 81.9985   1
   0 -12   1 380.509 79.5714  -2
   0 -12   4 380.509 79.5714   1
   1 -12   4 9.28260 43.1761   1
  -2  12   0 139.535 72.3391  -2
   2 -12   4 139.535 72.3391   1
  -3 -11   2 200.535 34.9294  -2
  -3 -11   4 200.535 34.9294   1
  -2 -11   4 -0.3997 20.6452   1
  -1 -11   1 512.663 43.3172  -2
  -1 -11   4 512.663 43.3172   1
   0 -11   1 63.0934 49.7227  -2
   0 -11   4 63.0934 49.7227   1
  -1  11   0 330.702 43.0246  -2
   1 -11   4 330.702 43.0246   1
  -2  11   0 48.0055 30.2073  -2
   2 -11   4 48.0055 30.2073   1
  -3  11   1 150.436 61.0760  -2
   3 -11   4 150.436 61.0760   1
  -4 -10   2 -1.6015 24.8382  -2
  -4 -10   4 -1.6015 24.8382   1
  -3 -10   4 200.187 23.6469   1
  -2 -10   1 532.350 38.3883  -2
  -2 -10   4 532.350 38.3883   1
  -1 -10   1 50.1106 40.0021  -2
  -1 -10   4 50.1106 40.0021   1
   0  10   0 144.714 34.7118  -2
   0 -10   4 144.714 34.7118   1
  -1  10   0 615.735 33.0754  -2
   1 -10   4 615.735 33.0754   1
  -2  10   1 361.322 49.8362  -2
   2 -10   4 361.322 49.8362   1
  -3  10   1 583.287 28.8337  -2
   3 -10   4 583.287 28.8337   1
   4 -10   4 21.3483 13.9564   1
  -5  10   2 632.433 61.6012  -2
   5 -10   4 632.433 61.6012   1
  -5  -9   2 12.0440 33.1697  -2
  -5  -9   4 12.0440 33.1697   1
  -4  -9   2 1065.58 93.4646  -2
  -4  -9   4 1065.58 93.4646   1
  -3  -9   1 236.874 28.7364  -2
  -3  -9   4 236.874 28.7364   1
  -2  -9   1 815.038 38.2282  -2
  -2  -9   4 815.038 38.2282   1
   1   9   0 1050.27 49.1322  -2
  -1  -9   4 1050.27 49.1322   1
   0   9   0 172.561 20.5930  -2
   0  -9   4 172.561 20.5930   1
   1  -9   4 1269.81 33.1508   1
  -2   9   1 513.908 24.6558  -2
   2  -9   4 513.908 24.6558   1
   3  -9   4 519.171 23.3250   1
  -4   9   2 67.6831 15.0601  -2
   4  -9   4 67.6831 15.0601   1
   5  -9   4 -20.899 13.2877   1
  -6  -8   2 412.168 35.8126  -2
  -6  -8   4 412.168 35.8126   1
  -5  -8   2 116.155 41.0959  -2
  -5  -8   4 116.155 41.0959   1
  -4  -8   1 76.2299 23.2495  -2
  -4  -8   4 76.2299 23.2495   1
  -3  -8   1 1086.46 33.5887  -2
  -3  -8   4 1086.46 33.5887   1
   2   8   0 455.397 92.1974  -2
  -2  -8   4 455.397 92.1974   1
   1   8   0 295.922 21.3741  -2
  -1  -8   4 295.922 21.3741   1
   0   8   1 816.899 113.283  -2
   0  -8   4 816.899 113.283   1
  -1   8   1 428.804 19.5449  -2
   1  -8   4 428.804 19.5449   1
   2  -8   4 535.427 18.4519   1
  -3   8   2 1072.32 28.2555  -2
   3  -8   4 1072.32 28.2555   1
   4  -8   4 43.7511 11.1549   1
  -5   8   3 291.266 26.8667  -2
   5  -8   4 291.266 26.8667   1
  -6   8   3 503.354 43.6851  -2
   6  -8   4 503.354 43.6851   1
  -7  -7   2 325.913 57.7696  -2
  -7  -7   4 325.913 57.7696   1
  -6  -7   2 376.265 30.4880  -2
  -6  -7   4 376.265 30.4880   1
  -5  -7   1 20.1204 22.6820  -2
  -5  -7   4 20.1204 22.6820   1
  -4  -7   1 489.457 22.6751  -2
  -4  -7   4 489.457 22.6751   1
   3   7   0 228.789 85.6208  -2
  -3  -7   4 228.789 85.6208   1
   2   7   0 832.072 26.6747  -2
  -2  -7   4 832.072 26.6747   1
   1   7   1 1823.84 133.254  -2
  -1  -7   4 1823.84 133.254   1
   0   7   1 181.293 11.6531  -2
   0  -7   4 181.293 11.6531   1
   1  -7   4 169.301 10.1221   1
  -2   7   2 1384.82 27.9669  -2
   2  -7   4 1384.82 27.9669   1
   3  -7   4 87.4883 10.2992   1
  -4   7   3 1537.49 37.0120  -2
   4  -7   4 1537.49 37.0120   1
  -5   7   3 272.670 45.4308  -2
   5  -7   4 272.670 45.4308   1
  -6   7   4 398.834 37.5102  -2
   6  -7   4 398.834 37.5102   1
  -7  -6   2 94.2731 33.5995  -2
  -7  -6   4 94.2731 33.5995   1
  -6  -6   1 55.5268 32.0801  -2
  -6  -6   4 55.5268 32.0801   1
  -5  -6   1 747.961 23.9034  -2
  -5  -6   4 747.961 23.9034   1
  -4  -6   4 88.6714 9.35733   1
   3   6   0 1826.84 37.0114  -2
  -3  -6   4 1826.84 37.0114   1
  -2  -6   4 410.803 11.5192   1
   1   6   1 1111.66 23.5613  -2
  -1  -6   4 1111.66 23.5613   1
   0   6   1 2164.08 141.376  -2
   0  -6   4 2164.08 141.376   1
  -1   6   2 71.8605 10.4575  -2
   1  -6   4 71.8605 10.4575   1
   2  -6   4 1708.52 31.9744   1
  -3   6   3 1691.61 33.0898  -2
   3  -6   4 1691.61 33.0898   1
  -4   6   3 273.492 29.9433  -2
   4  -6   4 273.492 29.9433   1
  -5   6   4 142.285 25.1297  -2
   5  -6   4 142.285 25.1297   1
  -6   6   4 104.563 29.8246  -2
   6  -6   4 104.563 29.8246   1
  -7   6   5 98.7860 42.1055  -2
   7  -6   4 98.7860 42.1055   1
  -7  -5   1 735.432 79.0410  -2
  -7  -5   4 735.432 79.0410   1
  -6  -5   1 986.269 31.6962  -2
  -6  -5   4 986.269 31.6962   1
  -5  -5   4 586.385 17.6847   1
   4   5   0 549.067 16.1629  -2
  -4  -5   4 549.067 16.1629   1
  -3  -5   4 7.78550 6.36212   1
   2   5   1 513.475 16.0693  -2
  -2  -5   4 513.475 16.0693   1
   1   5   1 806.278 82.7244  -2
  -1  -5   4 806.278 82.7244   1
   0   5   2 304.975 12.1116  -2
   0  -5   4 304.975 12.1116   1
  -1   5   2 1431.04 63.7213  -2
   1  -5   4 1431.04 63.7213   1
  -2   5   3 22.4328 9.44234  -2
   2  -5   4 22.4328 9.44234   1
  -3   5   3 333.426 16.7081  -2
   3  -5   4 333.426 16.7081   1
  -4   5   4 579.713 30.9241  -2
   4  -5   4 579.713 30.9241   1
  -5   5   4 152.589 22.1242  -2
   5  -5   4 152.589 22.1242   1
  -6   5   5 422.201 69.5109  -2
   6  -5   4 422.201 69.5109   1
  -7   5   5 550.398 31.9500  -2
   7  -5   4 550.398 31.9500   1
  -8  -4   1 458.066 72.9155  -2
  -8  -4   4 458.066 72.9155   1
  -7  -4   1 -6.0584 21.8123  -2
  -7  -4   4 -6.0584 21.8123   1
  -6  -4   4 83.5873 12.1223   1
   5   4   0 1152.63 22.5982  -2
  -5  -4   4 1152.63 22.5982   1
  -4  -4   4 20.2749 6.25091   1
   3   4   1 1179.10 22.4209  -2
  -3  -4   4 1179.10 22.4209   1
   2   4   1 2912.44 164.974  -2
  -2  -4   4 2912.44 164.974   1
   1   4   2 945.843 17.6538  -2
  -1  -4   4 945.843 17.6538   1
   0   4   2 1224.13 54.3252  -2
   0  -4   4 1224.13 54.3252   1
  -1   4   3 553.868 18.0706  -2
   1  -4   4 553.868 18.0706   1
  -2   4   3 620.324 14.6204  -2
   2  -4   4 620.324 14.6204   1
   3  -4   4 1229.24 19.8058   1
  -4   4   4 286.742 15.0788  -2
   4  -4   4 286.742 15.0788   1
   5  -4   4 1490.07 30.7446   1
  -6   4   5 166.998 17.7727  -2
   6  -4   4 166.998 17.7727   1
   7  -4   4 774.698 36.1012   1
  -8  -3   1 41.7088 22.4246  -2
  -8  -3   4 41.7088 22.4246   1
  -7  -3   4 31.4879 12.6348   1
   6   3   0 1193.77 30.2223  -2
  -6  -3   4 1193.77 30.2223   1
  -5  -3   4 5.00704 7.36773   1
   4   3   1 3861.36 58.6406  -2
  -4  -3   4 3861.36 58.6406   1
   3   3   1 110.607 58.2538  -2
  -3  -3   4 110.607 58.2538   1
   2   3   2 1446.94 27.1140  -2
  -2  -3   4 1446.94 27.1140   1
   1   3   2 3081.47 104.143  -2
  -1  -3   4 3081.47 104.143   1
   0   3   3 1501.67 58.9280  -2
   0  -3   4 1501.67 58.9280   1
  -1   3   3 5443.12 74.6058  -2
   1  -3   4 5443.12 74.6058   1
   2  -3   4 9.17380 4.00235   1
  -3   3   4 2721.82 37.2847  -2
   3  -3   4 2721.82 37.2847   1
   4  -3   4 11.7457 5.83284   1
  -5   3   5 110.436 12.0812  -2
   5  -3   4 110.436 12.0812   1
   6  -3   4 173.436 14.1963   1
  -7   3   6 210.940 24.2133  -2
   7  -3   4 210.940 24.2133   1
   8  -3   4 67.8893 24.0773   1
  -8  -2   4 854.318 31.9029   1
   7   2   0 20.7731 18.7865  -2
  -7  -2   4 20.7731 18.7865   1
  -6  -2   4 1319.26 31.8589   1
   5   2   1 437.533 17.5903  -2
  -5  -2   4 437.533 17.5903   1
   4   2   1 254.910 69.9001  -2
  -4  -2   4 254.910 69.9001   1
   3   2   2 893.780 33.4779  -2
  -3  -2   4 893.780 33.4779   1
   2   2   2 1393.01 38.8126  -2
  -2  -2   4 1393.01 38.8126   1
   1   2   3 1062.46 73.5340  -2
  -1  -2   4 1062.46 73.5340   1
   0   2   3 5494.11 74.4609  -2
   0  -2   4 5494.11 74.4609   1
   1  -2   4 582.292 10.8284   1
  -2   2   4 827.036 15.2425  -2
   2  -2   4 827.036 15.2425   1
   3  -2   4 309.328 8.03403   1
  -4   2   5 722.200 17.3057  -2
   4  -2   4 722.200 17.3057   1
   5  -2   4 972.649 24.8973   1
  -6   2   6 354.003 18.7699  -2
   6  -2   4 354.003 18.7699   1
  -7   2   6 147.265 64.0872  -2
   7  -2   4 147.265 64.0872   1
  -8   2   7 24.7229 44.1578  -2
   8  -2   4 24.7229 44.1578   1
   8   1   0 29.4772 22.8742  -2
  -8  -1   4 29.4772 22.8742   1
  -7  -1   4 133.005 14.6611   1
   6   1   1 -2.7510 18.5457  -2
  -6  -1   4 -2.7510 18.5457   1
   5   1   1 90.5799 35.4981  -2
  -5  -1   4 90.5799 35.4981   1
   4   1   2 2343.53 80.4965  -2
  -4  -1   4 2343.53 80.4965   1
   3   1   2 326.945 16.2604  -2
  -3  -1   4 326.945 16.2604   1
  -2  -1   4 2348.51 30.3245   1
   1   1   3 2431.31 36.0183  -2
  -1  -1   4 2431.31 36.0183   1
   0  -1   4 26.3759 3.66729   1
  -1   1   4 966.595 16.2448  -2
   1  -1   4 966.595 16.2448   1
   2  -1   4 1314.68 21.0713   1
  -3   1   5 144.657 6.91536  -2
   3  -1   4 144.657 6.91536   1
   4  -1   4 1162.67 21.5532   1
  -5   1   6 211.101 17.2820  -2
   5  -1   4 211.101 17.2820   1
  -6   1   6 466.421 47.2804  -2
   6  -1   4 466.421 47.2804   1
  -7   1   7 147.875 26.3859  -2
   7  -1   4 147.875 26.3859   1
  -8   1   7 207.307 49.5034  -2
   8  -1   4 207.307 49.5034   1
   8   0   0 68.6209 33.4536  -2
  -8   0   4 68.6209 33.4536   1
   7   0   1 410.620 27.9370  -2
  -7   0   4 410.620 27.9370   1
   6   0   1 450.063 26.1231  -2
  -6   0   4 450.063 26.1231   1
   5   0   2 581.358 67.0235  -2
  -5   0   4 581.358 67.0235   1
   4   0   2 29.2840 9.40161  -2
  -4   0   4 29.2840 9.40161   1
  -3   0   4 1931.65 25.4046   1
   2   0   3 2297.54 30.1914  -2
  -2   0   4 2297.54 30.1914   1
  -1   0   4 2817.52 37.5984   1
   0   0   4 6268.53 79.4167  -2
   0   0   4 6268.53 79.4167   1
   1   0   4 154.628 5.09463   1
  -2   0   5 3811.65 53.3838  -2
   2   0   4 3811.65 53.3838   1
   3   0   4 26.8614 5.06171   1
  -4   0   6 966.477 22.4598  -2
   4   0   4 966.477 22.4598   1
  -5   0   6 570.217 34.0610  -2
   5   0   4 570.217 34.0610   1
  -6   0   7 829.909 29.4037  -2
   6   0   4 829.909 29.4037   1
  -7   0   7 204.424 26.5613  -2
   7   0   4 204.424 26.5613   1
   8  -1   1 -12.928 27.6463  -2
  -8   1   4 -12.928 27.6463   1
   7  -1   1 1607.40 47.7339  -2
  -7   1   4 1607.40 47.7339   1
  -6   1   4 104.611 9.76566   1
   5  -1   2 1159.49 24.0753  -2
  -5   1   4 1159.49 24.0753   1
  -4   1   4 767.724 15.1892   1
   3  -1   3 1768.18 28.9262  -2
  -3   1   4 1768.18 28.9262   1
  -2   1   4 1528.21 21.1922   1
   1  -1   4 1251.91 18.3416  -2
  -1   1   4 1251.91 18.3416   1
   0   1   4 466.880 9.64602   1
  -1  -1   5 1855.89 29.3980  -2
   1   1   4 1855.89 29.3980   1
   2   1   4 34.7114 2.68811   1
  -3  -1   6 304.662 12.8515  -2
   3   1   4 304.662 12.8515   1
  -4  -1   6 1148.71 38.1128  -2
   4   1   4 1148.71 38.1128   1
  -5  -1   7 354.056 21.7977  -2
   5   1   4 354.056 21.7977   1
  -6  -1   7 769.130 29.9227  -2
   6   1   4 769.130 29.9227   1
   7   1   4 86.8852 14.0254   1
   8  -2   1 324.945 29.0613  -2
  -8   2   4 324.945 29.0613   1
  -7   2   4 44.6098 12.3765   1
   6  -2   2 23.4538 13.9916  -2
  -6   2   4 23.4538 13.9916   1
  -5   2   4 546.452 14.8109   1
   4  -2   3 238.719 9.92311  -2
  -4   2   4 238.719 9.92311   1
  -3   2   4 3337.49 47.7827   1
   2  -2   4 748.064 12.1911  -2
  -2   2   4 748.064 12.1911   1
  -1   2   4 816.283 13.5347   1
   0  -2   5 492.575 10.6804  -2
   0   2   4 492.575 10.6804   1
  -1  -2   5 1711.39 76.5635  -2
   1   2   4 1711.39 76.5635   1
  -2  -2   6 505.344 14.5745  -2
   2   2   4 505.344 14.5745   1
  -3  -2   6 1003.90 23.9420  -2
   3   2   4 1003.90 23.9420   1
  -4  -2   7 268.903 59.4912  -2
   4   2   4 268.903 59.4912   1
  -5  -2   7 1387.92 36.6053  -2
   5   2   4 1387.92 36.6053   1
   6   2   4 68.7533 13.7855   1
  -7  -2   8 402.824 32.2794  -2
   7   2   4 402.824 32.2794   1
  -8   3   4 0.81428 14.1229   1
   7  -3   2 715.644 30.0352  -2
  -7   3   4 715.644 30.0352   1
  -6   3   4 371.514 15.6372   1
   5  -3   3 112.580 14.6234  -2
  -5   3   4 112.580 14.6234   1
  -4   3   4 831.558 18.1061   1
   3  -3   4 1932.96 32.0355  -2
  -3   3   4 1932.96 32.0355   1
  -2   3   4 1041.50 17.1043   1
   1  -3   5 2237.41 31.3434  -2
  -1   3   4 2237.41 31.3434   1
   0  -3   5 183.074 33.2363  -2
   0   3   4 183.074 33.2363   1
  -1  -3   6 6271.67 158.757  -2
   1   3   4 6271.67 158.757   1
  -2  -3   6 458.942 15.0742  -2
   2   3   4 458.942 15.0742   1
  -3  -3   7 2394.78 128.333  -2
   3   3   4 2394.78 128.333   1
  -4  -3   7 565.711 22.0832  -2
   4   3   4 565.711 22.0832   1
   5   3   4 61.9742 11.1049   1
  -6  -3   8 223.187 25.3449  -2
   6   3   4 223.187 25.3449   1
   7   3   4 22.5220 16.3544   1
   8  -4   2 579.321 32.0115  -2
  -8   4   4 579.321 32.0115   1
  -7   4   4 -14.750 9.95684   1
   6  -4   3 796.204 26.6894  -2
  -6   4   4 796.204 26.6894   1
  -5   4   4 106.951 10.1678   1
   4  -4   4 341.164 16.0153  -2
  -4   4   4 341.164 16.0153   1
  -3   4   4 1118.76 19.6383   1
   2  -4   5 1083.57 23.0709  -2
  -2   4   4 1083.57 23.0709   1
   1  -4   5 1443.28 44.7395  -2
  -1   4   4 1443.28 44.7395   1
   0  -4   6 33.8820 25.4817  -2
   0   4   4 33.8820 25.4817   1
  -1  -4   6 609.820 16.6205  -2
   1   4   4 609.820 16.6205   1
  -2  -4   7 598.841 63.0730  -2
   2   4   4 598.841 63.0730   1
  -3  -4   7 447.387 18.3096  -2
   3   4   4 447.387 18.3096   1
   4   4   4 34.9919 9.57279   1
  -5  -4   8 712.342 28.5267  -2
   5   4   4 712.342 28.5267   1
   6   4   4 24.2265 16.1443   1
  -8   5   4 111.213 30.5891   1
   7  -5   3 433.608 25.8476  -2
  -7   5   4 433.608 25.8476   1
  -6   5   4 7.71120 10.6325   1
   5  -5   4 119.345 21.3234  -2
  -5   5   4 119.345 21.3234   1
   4  -5   4 498.872 57.0088  -2
  -4   5   4 498.872 57.0088   1
   3  -5   5 509.998 49.1212  -2
  -3   5   4 509.998 49.1212   1
   2  -5   5 701.569 19.5162  -2
  -2   5   4 701.569 19.5162   1
  -1   5   4 22.3246 4.96396   1
   0  -5   6 265.520 12.0930  -2
   0   5   4 265.520 12.0930   1
   1   5   4 253.670 7.84222   1
  -2  -5   7 954.672 20.0984  -2
   2   5   4 954.672 20.0984   1
   3   5   4 87.9192 11.8286   1
  -4  -5   8 438.617 24.9320  -2
   4   5   4 438.617 24.9320   1
   5   5   4 37.6230 13.6665   1
  -6  -5   9 175.785 34.4711  -2
   6   5   4 175.785 34.4711   1
   7  -6   3 151.587 54.7666  -2
  -7   6   4 151.587 54.7666   1
   6  -6   4 178.935 28.8697  -2
  -6   6   4 178.935 28.8697   1
   5  -6   4 229.841 28.4881  -2
  -5   6   4 229.841 28.4881   1
   4  -6   5 272.691 38.7336  -2
  -4   6   4 272.691 38.7336   1
   3  -6   5 918.811 31.4625  -2
  -3   6   4 918.811 31.4625   1
  -2   6   4 160.451 11.4537   1
   1  -6   6 239.254 12.5432  -2
  -1   6   4 239.254 12.5432   1
   0   6   4 1814.40 32.8905   1
  -1  -6   7 519.330 12.9131  -2
   1   6   4 519.330 12.9131   1
   2   6   4 1604.94 36.8153   1
  -3  -6   8 1156.49 38.4443  -2
   3   6   4 1156.49 38.4443   1
   4   6   4 458.173 23.6116   1
  -5  -6   9 319.356 32.3759  -2
   5   6   4 319.356 32.3759   1
  -6  -6   9 121.711 70.0636  -2
   6   6   4 121.711 70.0636   1
   7  -7   4 786.971 62.5497  -2
  -7   7   4 786.971 62.5497   1
   6  -7   4 249.633 32.1815  -2
  -6   7   4 249.633 32.1815   1
   5  -7   5 498.279 58.8571  -2
  -5   7   4 498.279 58.8571   1
   4  -7   5 513.027 29.7066  -2
  -4   7   4 513.027 29.7066   1
  -3   7   4 6.48217 11.1125   1
   2  -7   6 803.318 27.1770  -2
  -2   7   4 803.318 27.1770   1
  -1   7   4 75.8794 10.1280   1
   0  -7   7 596.738 20.3583  -2
   0   7   4 596.738 20.3583   1
   1   7   4 120.664 11.1665   1
  -2  -7   8 532.379 26.9505  -2
   2   7   4 532.379 26.9505   1
   3   7   4 -5.0247 10.8993   1
  -4  -7   9 346.955 31.8708  -2
   4   7   4 346.955 31.8708   1
  -5  -7   9 149.482 36.8587  -2
   5   7   4 149.482 36.8587   1
   6  -8   5 39.7404 77.5051  -2
  -6   8   4 39.7404 77.5051   1
   5  -8   5 240.541 27.1693  -2
  -5   8   4 240.541 27.1693   1
  -4   8   4 80.0772 15.0718   1
   3  -8   6 919.303 31.0094  -2
  -3   8   4 919.303 31.0094   1
  -2   8   4 62.3943 12.5469   1
   1  -8   7 226.991 19.4667  -2
  -1   8   4 226.991 19.4667   1
   0   8   4 30.4646 10.6575   1
  -1  -8   8 59.0043 31.5636  -2
   1   8   4 59.0043 31.5636   1
  -2  -8   8 334.982 92.0845  -2
   2   8   4 334.982 92.0845   1
  -3  -8   9 493.452 34.4825  -2
   3   8   4 493.452 34.4825   1
  -4  -8   9 39.1642 37.6682  -2
   4   8   4 39.1642 37.6682   1
  -5   9   4 47.7892 18.6375   1
   4  -9   6 399.208 30.0168  -2
  -4   9   4 399.208 30.0168   1
  -3   9   4 5.98549 14.9415   1
   2  -9   7 77.5437 26.3990  -2
  -2   9   4 77.5437 26.3990   1
  -1   9   4 236.053 18.5566   1
   0  -9   8 234.753 26.2378  -2
   0   9   4 234.753 26.2378   1
  -1  -9   8 705.105 62.0376  -2
   1   9   4 705.105 62.0376   1
  -2  -9   9 65.7026 29.2692  -2
   2   9   4 65.7026 29.2692   1
  -3  -9   9 451.726 37.9894  -2
   3   9   4 451.726 37.9894   1
   3 -10   7 428.320 37.2605  -2
  -3  10   4 428.320 37.2605   1
   2 -10   7 485.251 51.3821  -2
  -2  10   4 485.251 51.3821   1
   1 -10   8 415.742 35.2397  -2
  -1  10   4 415.742 35.2397   1
   0 -10   8 318.029 35.8998  -2
   0  10   4 318.029 35.8998   1
  -1 -10   9 207.437 37.2032  -2
   1  10   4 207.437 37.2032   1
  -1 -12   5 37.8533 82.0663   1
  -3 -11   1 77.6572 57.0070  -2
  -3 -11   5 77.6572 57.0070   1
  -2 -11   5 425.717 32.9449   1
   1  11   0 239.905 40.1080  -2
  -1 -11   5 239.905 40.1080   1
   0  11   0 307.138 81.4938  -2
   0 -11   5 307.138 81.4938   1
  -1  11   1 111.925 44.3235  -2
   1 -11   5 111.925 44.3235   1
  -2  11   1 352.984 39.7816  -2
   2 -11   5 352.984 39.7816   1
  -3  11   2 219.417 73.8123  -2
   3 -11   5 219.417 73.8123   1
  -4 -10   1 93.6811 28.5799  -2
  -4 -10   5 93.6811 28.5799   1
  -3 -10   1 237.068 97.4532  -2
  -3 -10   5 237.068 97.4532   1
   2  10   0 86.0571 29.8601  -2
  -2 -10   5 86.0571 29.8601   1
   1  10   0 69.2266 49.6181  -2
  -1 -10   5 69.2266 49.6181   1
   0  10   1 1366.26 50.3820  -2
   0 -10   5 1366.26 50.3820   1
  -1  10   1 60.3218 23.9925  -2
   1 -10   5 60.3218 23.9925   1
  -2  10   2 450.455 67.8797  -2
   2 -10   5 450.455 67.8797   1
  -3  10   2 216.464 25.1402  -2
   3 -10   5 216.464 25.1402   1
   4 -10   5 22.9675 15.1858   1
  -5  -9   1 22.6544 33.2409  -2
  -5  -9   5 22.6544 33.2409   1
  -4  -9   1 143.691 44.9207  -2
  -4  -9   5 143.691 44.9207   1
   3   9   0 275.106 26.6844  -2
  -3  -9   5 275.106 26.6844   1
   2   9   0 173.454 24.8860  -2
  -2  -9   5 173.454 24.8860   1
   1   9   1 502.609 34.3317  -2
  -1  -9   5 502.609 34.3317   1
   0   9   1 75.2207 20.5250  -2
   0  -9   5 75.2207 20.5250   1
   1  -9   5 938.751 28.8074   1
  -2   9   2 392.986 23.7721  -2
   2  -9   5 392.986 23.7721   1
   3  -9   5 215.728 17.3182   1
  -4   9   3 1409.79 38.5345  -2
   4  -9   5 1409.79 38.5345   1
   5  -9   5 -18.675 13.8136   1
  -6  -8   1 184.871 52.9821  -2
  -6  -8   5 184.871 52.9821   1
  -5  -8   1 1392.80 42.7071  -2
  -5  -8   5 1392.80 42.7071   1
   4   8   0 26.5216 24.3628  -2
  -4  -8   5 26.5216 24.3628   1
   3   8   0 2069.10 50.2510  -2
  -3  -8   5 2069.10 50.2510   1
   2   8   1 160.359 37.2679  -2
  -2  -8   5 160.359 37.2679   1
   1   8   1 671.506 26.9377  -2
  -1  -8   5 671.506 26.9377   1
   0   8   2 810.404 99.1964  -2
   0  -8   5 810.404 99.1964   1
  -1   8   2 868.251 25.9005  -2
   1  -8   5 868.251 25.9005   1
   2  -8   5 418.647 17.4848   1
  -3   8   3 125.756 15.0849  -2
   3  -8   5 125.756 15.0849   1
   4  -8   5 102.530 14.4729   1
  -5   8   4 304.838 28.5265  -2
   5  -8   5 304.838 28.5265   1
   6  -8   5 1.44386 16.5719   1
  -6  -7   1 124.737 32.2102  -2
  -6  -7   5 124.737 32.2102   1
   5   7   0 165.814 25.0902  -2
  -5  -7   5 165.814 25.0902   1
   4   7   0 542.866 24.1816  -2
  -4  -7   5 542.866 24.1816   1
   3   7   1 842.216 105.643  -2
  -3  -7   5 842.216 105.643   1
   2   7   1 143.565 18.2315  -2
  -2  -7   5 143.565 18.2315   1
   1   7   2 212.801 57.6894  -2
  -1  -7   5 212.801 57.6894   1
   0   7   2 85.1065 10.6406  -2
   0  -7   5 85.1065 10.6406   1
   1  -7   5 874.768 21.2344   1
  -2   7   3 144.696 13.9584  -2
   2  -7   5 144.696 13.9584   1
   3  -7   5 475.507 18.7386   1
  -4   7   4 337.809 24.6595  -2
   4  -7   5 337.809 24.6595   1
  -5   7   4 361.297 50.3816  -2
   5  -7   5 361.297 50.3816   1
  -6   7   5 178.012 32.7811  -2
   6  -7   5 178.012 32.7811   1
  -7  -6   1 56.0769 34.0552  -2
  -7  -6   5 56.0769 34.0552   1
   6   6   0 219.764 58.3575  -2
  -6  -6   5 219.764 58.3575   1
   5   6   0 441.294 21.8776  -2
  -5  -6   5 441.294 21.8776   1
   4   6   1 90.3410 90.8568  -2
  -4  -6   5 90.3410 90.8568   1
   3   6   1 896.112 24.2561  -2
  -3  -6   5 896.112 24.2561   1
   2   6   2 1195.95 102.320  -2
  -2  -6   5 1195.95 102.320   1
   1   6   2 72.4941 9.49425  -2
  -1  -6   5 72.4941 9.49425   1
   0  -6   5 1101.06 23.2742   1
  -1   6   3 1055.48 23.1794  -2
   1  -6   5 1055.48 23.1794   1
   2  -6   5 603.908 16.5630   1
  -3   6   4 1076.51 27.2651  -2
   3  -6   5 1076.51 27.2651   1
  -4   6   4 195.687 30.0244  -2
   4  -6   5 195.687 30.0244   1
  -5   6   5 1265.66 39.8125  -2
   5  -6   5 1265.66 39.8125   1
  -6   6   5 162.610 31.8906  -2
   6  -6   5 162.610 31.8906   1
   7  -6   5 467.717 45.9523   1
   7   5   0 1044.63 84.5162  -2
  -7  -5   5 1044.63 84.5162   1
   6   5   0 517.836 30.2879  -2
  -6  -5   5 517.836 30.2879   1
  -5  -5   5 140.245 11.8538   1
   4   5   1 2131.26 37.1065  -2
  -4  -5   5 2131.26 37.1065   1
   3   5   1 -122.44 76.9741  -2
  -3  -5   5 -122.44 76.9741   1
   2   5   2 1856.65 34.7928  -2
  -2  -5   5 1856.65 34.7928   1
   1   5   2 2564.77 152.734  -2
  -1  -5   5 2564.77 152.734   1
   0   5   3 557.276 15.8846  -2
   0  -5   5 557.276 15.8846   1
  -1   5   3 1995.70 78.8329  -2
   1  -5   5 1995.70 78.8329   1
  -2   5   4 534.718 14.7252  -2
   2  -5   5 534.718 14.7252   1
  -3   5   4 628.460 23.4669  -2
   3  -5   5 628.460 23.4669   1
  -4   5   5 280.566 30.5361  -2
   4  -5   5 280.566 30.5361   1
  -5   5   5 453.227 27.1637  -2
   5  -5   5 453.227 27.1637   1
   6  -5   5 97.7304 13.9241   1
  -7   5   6 300.958 30.9842  -2
   7  -5   5 300.958 30.9842   1
  -8  -4   5 263.558 28.4263   1
   7   4   0 56.0726 23.6543  -2
  -7  -4   5 56.0726 23.6543   1
  -6  -4   5 671.161 24.4560   1
   5   4   1 224.599 13.7082  -2
  -5  -4   5 224.599 13.7082   1
  -4  -4   5 190.031 9.96429   1
   3   4   2 1707.37 28.0083  -2
  -3  -4   5 1707.37 28.0083   1
   2   4   2 714.576 77.6681  -2
  -2  -4   5 714.576 77.6681   1
   1   4   3 148.677 9.65450  -2
  -1  -4   5 148.677 9.65450   1
   0   4   3 2891.82 153.770  -2
   0  -4   5 2891.82 153.770   1
  -1   4   4 1425.22 29.4025  -2
   1  -4   5 1425.22 29.4025   1
  -2   4   4 1627.36 25.6511  -2
   2  -4   5 1627.36 25.6511   1
   3  -4   5 19.2926 5.74575   1
  -4   4   5 -3.8000 14.7509  -2
   4  -4   5 -3.8000 14.7509   1
   5  -4   5 130.291 11.8149   1
  -6   4   6 442.594 21.7928  -2
   6  -4   5 442.594 21.7928   1
   7  -4   5 59.7673 16.5181   1
   8   3   0 30.0309 23.7644  -2
  -8  -3   5 30.0309 23.7644   1
  -7  -3   5 376.661 21.6889   1
   6   3   1 521.176 22.6167  -2
  -6  -3   5 521.176 22.6167   1
  -5  -3   5 92.2105 11.5391   1
   4   3   2 361.102 13.0199  -2
  -4  -3   5 361.102 13.0199   1
   3   3   2 1034.94 93.3741  -2
  -3  -3   5 1034.94 93.3741   1
   2   3   3 1142.19 24.6802  -2
  -2  -3   5 1142.19 24.6802   1
   1   3   3 1647.64 65.3271  -2
  -1  -3   5 1647.64 65.3271   1
   0   3   4 115.762 31.9530  -2
   0  -3   5 115.762 31.9530   1
  -1   3   4 2369.28 35.8148  -2
   1  -3   5 2369.28 35.8148   1
   2  -3   5 682.044 13.8820   1
  -3   3   5 404.325 12.8942  -2
   3  -3   5 404.325 12.8942   1
   4  -3   5 1722.56 29.2503   1
  -5   3   6 377.033 16.9067  -2
   5  -3   5 377.033 16.9067   1
   6  -3   5 1302.86 32.3655   1
  -7   3   7 451.795 28.9430  -2
   7  -3   5 451.795 28.9430   1
  -8  -2   5 65.8618 15.9722   1
   7   2   1 42.4438 19.9983  -2
  -7  -2   5 42.4438 19.9983   1
  -6  -2   5 15.2313 11.1349   1
   5   2   2 1538.74 38.2700  -2
  -5  -2   5 1538.74 38.2700   1
   4   2   2 627.091 79.7545  -2
  -4  -2   5 627.091 79.7545   1
   3   2   3 4996.46 112.783  -2
  -3  -2   5 4996.46 112.783   1
   2   2   3 3703.18 96.0308  -2
  -2  -2   5 3703.18 96.0308   1
   1   2   4 2588.36 139.497  -2
  -1  -2   5 2588.36 139.497   1
   0   2   4 709.351 14.0852  -2
   0  -2   5 709.351 14.0852   1
   1  -2   5 2.32716 2.65391   1
  -2   2   5 1075.65 20.6752  -2
   2  -2   5 1075.65 20.6752   1
   3  -2   5 144.233 7.40110   1
  -4   2   6 661.397 17.3934  -2
   4  -2   5 661.397 17.3934   1
   5  -2   5 33.3294 9.75061   1
  -6   2   7 157.074 18.6956  -2
   6  -2   5 157.074 18.6956   1
   7  -2   5 -0.7934 12.3744   1
   8   1   1 136.662 24.8369  -2
  -8  -1   5 136.662 24.8369   1
  -7  -1   5 695.803 27.9107   1
   6   1   2 1096.05 35.1972  -2
  -6  -1   5 1096.05 35.1972   1
   5   1   2 759.576 75.0292  -2
  -5  -1   5 759.576 75.0292   1
   4   1   3 649.802 41.9798  -2
  -4  -1   5 649.802 41.9798   1
   3   1   3 893.609 22.7792  -2
  -3  -1   5 893.609 22.7792   1
  -2  -1   5 141.861 5.90485   1
   1   1   4 1491.67 24.2110  -2
  -1  -1   5 1491.67 24.2110   1
   0  -1   5 138.607 5.78645   1
  -1   1   5 2618.77 35.7907  -2
   1  -1   5 2618.77 35.7907   1
   2  -1   5 -3.1480 4.80767   1
  -3   1   6 541.335 14.2589  -2
   3  -1   5 541.335 14.2589   1
   4  -1   5 95.2302 8.71538   1
  -5   1   7 62.4894 16.7469  -2
   5  -1   5 62.4894 16.7469   1
  -6   1   7 159.321 66.6725  -2
   6  -1   5 159.321 66.6725   1
  -7   1   8 417.079 30.6863  -2
   7  -1   5 417.079 30.6863   1
   8   0   1 492.501 40.3778  -2
  -8   0   5 492.501 40.3778   1
   7   0   2 121.952 23.3252  -2
  -7   0   5 121.952 23.3252   1
   6   0   2 881.774 29.2865  -2
  -6   0   5 881.774 29.2865   1
   5   0   3 497.596 32.1127  -2
  -5   0   5 497.596 32.1127   1
   4   0   3 319.306 12.3895  -2
  -4   0   5 319.306 12.3895   1
  -3   0   5 894.085 14.2068   1
   2   0   4 2932.01 41.4385  -2
  -2   0   5 2932.01 41.4385   1
  -1   0   5 125.448 5.29174   1
   0   0   5 1761.26 27.6633  -2
   0   0   5 1761.26 27.6633   1
   1   0   5 2.39779 3.52691   1
  -2   0   6 958.484 18.5774  -2
   2   0   5 958.484 18.5774   1
   3   0   5 872.529 17.1275   1
  -4   0   7 518.978 20.2554  -2
   4   0   5 518.978 20.2554   1
  -5   0   7 1918.16 52.2689  -2
   5   0   5 1918.16 52.2689   1
  -6   0   8 33.3677 25.1574  -2
   6   0   5 33.3677 25.1574   1
  -7   0   8 526.701 32.0937  -2
   7   0   5 526.701 32.0937   1
   8  -1   2 -46.402 28.4324  -2
  -8   1   5 -46.402 28.4324   1
   7  -1   2 366.628 27.8148  -2
  -7   1   5 366.628 27.8148   1
   6  -1   3 1246.01 97.7653  -2
  -6   1   5 1246.01 97.7653   1
   5  -1   3 21.5390 11.6913  -2
  -5   1   5 21.5390 11.6913   1
  -4   1   5 1686.41 26.6195   1
   3  -1   4 118.599 8.69711  -2
  -3   1   5 118.599 8.69711   1
  -2   1   5 2692.86 37.0939   1
   1  -1   5 2387.36 35.9356  -2
  -1   1   5 2387.36 35.9356   1
   0   1   5 1237.31 20.0045   1
  -1  -1   6 4840.13 74.2429  -2
   1   1   5 4840.13 74.2429   1
   2   1   5 12.4784 4.86164   1
  -3  -1   7 1600.95 31.2814  -2
   3   1   5 1600.95 31.2814   1
  -4  -1   7 823.482 31.8769  -2
   4   1   5 823.482 31.8769   1
  -5  -1   8 59.4534 25.4685  -2
   5   1   5 59.4534 25.4685   1
  -6  -1   8 144.102 27.1334  -2
   6   1   5 144.102 27.1334   1
   7   1   5 22.3739 14.1169   1
   8  -2   2 332.764 29.5057  -2
  -8   2   5 332.764 29.5057   1
  -7   2   5 -1.0359 12.1253   1
   6  -2   3 1240.31 33.0685  -2
  -6   2   5 1240.31 33.0685   1
  -5   2   5 11.7163 6.92014   1
   4  -2   4 965.901 19.8491  -2
  -4   2   5 965.901 19.8491   1
  -3   2   5 113.443 7.10910   1
   2  -2   5 820.797 14.4646  -2
  -2   2   5 820.797 14.4646   1
  -1   2   5 404.793 9.60023   1
   0  -2   6 3812.99 63.6790  -2
   0   2   5 3812.99 63.6790   1
  -1  -2   6 182.309 22.7600  -2
   1   2   5 182.309 22.7600   1
  -2  -2   7 1475.94 34.4231  -2
   2   2   5 1475.94 34.4231   1
  -3  -2   7 812.218 24.9690  -2
   3   2   5 812.218 24.9690   1
   4   2   5 70.9675 10.8067   1
  -5  -2   8 224.331 24.0061  -2
   5   2   5 224.331 24.0061   1
   6   2   5 85.8820 15.2325   1
  -7  -2   9 118.013 28.8277  -2
   7   2   5 118.013 28.8277   1
  -8   3   5 69.6988 16.4812   1
   7  -3   3 319.222 27.5762  -2
  -7   3   5 319.222 27.5762   1
  -6   3   5 5.54888 9.30543   1
   5  -3   4 72.4893 13.0885  -2
  -5   3   5 72.4893 13.0885   1
  -4   3   5 323.900 12.5131   1
   3  -3   5 349.143 12.1621  -2
  -3   3   5 349.143 12.1621   1
  -2   3   5 769.160 13.5183   1
   1  -3   6 1387.28 26.5555  -2
  -1   3   5 1387.28 26.5555   1
   0  -3   6 573.653 49.5515  -2
   0   3   5 573.653 49.5515   1
  -1  -3   7 488.537 24.3263  -2
   1   3   5 488.537 24.3263   1
  -2  -3   7 989.810 23.9896  -2
   2   3   5 989.810 23.9896   1
  -3  -3   8 154.606 60.1539  -2
   3   3   5 154.606 60.1539   1
  -4  -3   8 1741.86 40.9802  -2
   4   3   5 1741.86 40.9802   1
   5   3   5 10.9562 11.1450   1
  -6  -3   9 717.152 35.7094  -2
   6   3   5 717.152 35.7094   1
   7   3   5 40.0143 25.4748   1
   8  -4   3 68.7335 40.9580  -2
  -8   4   5 68.7335 40.9580   1
  -7   4   5 14.7904 10.5259   1
   6  -4   4 112.372 17.2513  -2
  -6   4   5 112.372 17.2513   1
  -5   4   5 473.632 18.7171   1
   4  -4   5 12.8808 16.7823  -2
  -4   4   5 12.8808 16.7823   1
  -3   4   5 2589.03 45.2312   1
   2  -4   6 402.844 16.7840  -2
  -2   4   5 402.844 16.7840   1
   1  -4   6 1342.26 39.1954  -2
  -1   4   5 1342.26 39.1954   1
   0  -4   7 2617.29 129.134  -2
   0   4   5 2617.29 129.134   1
  -1  -4   7 392.184 20.2971  -2
   1   4   5 392.184 20.2971   1
  -2  -4   8 966.867 81.8236  -2
   2   4   5 966.867 81.8236   1
  -3  -4   8 170.436 16.2507  -2
   3   4   5 170.436 16.2507   1
   4   4   5 580.022 21.9928   1
  -5  -4   9 45.8970 21.9493  -2
   5   4   5 45.8970 21.9493   1
   6   4   5 84.4711 18.2588   1
   7  -5   4 659.862 33.1760  -2
  -7   5   5 659.862 33.1760   1
  -6   5   5 15.0790 12.1395   1
   5  -5   5 599.171 33.1177  -2
  -5   5   5 599.171 33.1177   1
  -4   5   5 36.8491 11.6447   1
   3  -5   6 614.291 32.7736  -2
  -3   5   5 614.291 32.7736   1
   2  -5   6 160.910 15.7936  -2
  -2   5   5 160.910 15.7936   1
  -1   5   5 12.4447 4.67705   1
   0  -5   7 474.274 25.9104  -2
   0   5   5 474.274 25.9104   1
   1   5   5 530.333 13.3234   1
  -2  -5   8 70.0717 11.3857  -2
   2   5   5 70.0717 11.3857   1
   3   5   5 317.991 18.0793   1
  -4  -5   9 546.809 29.2264  -2
   4   5   5 546.809 29.2264   1
   5   5   5 -3.1676 15.0375   1
   7  -6   4 95.2728 45.0402  -2
  -7   6   5 95.2728 45.0402   1
   6  -6   5 155.114 30.1457  -2
  -6   6   5 155.114 30.1457   1
   5  -6   5 936.526 40.3977  -2
  -5   6   5 936.526 40.3977   1
   4  -6   6 81.9264 28.5204  -2
  -4   6   5 81.9264 28.5204   1
   3  -6   6 586.305 29.7024  -2
  -3   6   5 586.305 29.7024   1
  -2   6   5 165.121 12.3512   1
   1  -6   7 570.366 21.6216  -2
  -1   6   5 570.366 21.6216   1
   0   6   5 240.337 10.0185   1
  -1  -6   8 854.984 16.6920  -2
   1   6   5 854.984 16.6920   1
   2   6   5 10.5584 7.92586   1
  -3  -6   9 255.552 23.1826  -2
   3   6   5 255.552 23.1826   1
   4   6   5 27.3966 13.3151   1
  -5  -6  10 644.994 43.8704  -2
   5   6   5 644.994 43.8704   1
   6  -7   5 264.618 32.7091  -2
  -6   7   5 264.618 32.7091   1
   5  -7   6 173.466 44.1517  -2
  -5   7   5 173.466 44.1517   1
   4  -7   6 1153.72 43.1293  -2
  -4   7   5 1153.72 43.1293   1
  -3   7   5 3.30593 10.9339   1
   2  -7   7 503.426 26.0096  -2
  -2   7   5 503.426 26.0096   1
  -1   7   5 311.256 15.0655   1
   0  -7   8 276.714 11.9876  -2
   0   7   5 276.714 11.9876   1
   1   7   5 1153.43 25.9363   1
  -2  -7   9 238.164 22.2225  -2
   2   7   5 238.164 22.2225   1
   3   7   5 949.112 32.1154   1
  -4  -7  10 148.457 29.4698  -2
   4   7   5 148.457 29.4698   1
  -6   8   5 417.725 56.9999   1
   5  -8   6 459.497 33.4329  -2
  -5   8   5 459.497 33.4329   1
  -4   8   5 413.451 24.2925   1
   3  -8   7 343.137 23.0932  -2
  -3   8   5 343.137 23.0932   1
  -2   8   5 6.92080 10.6982   1
   1  -8   8 156.317 19.6712  -2
  -1   8   5 156.317 19.6712   1
   0   8   5 421.164 19.9733   1
  -1  -8   9 753.015 51.6644  -2
   1   8   5 753.015 51.6644   1
  -2  -8   9 49.1689 85.2736  -2
   2   8   5 49.1689 85.2736   1
  -3  -8  10 90.6939 26.6457  -2
   3   8   5 90.6939 26.6457   1
  -4  -8  10 36.5153 78.7530  -2
   4   8   5 36.5153 78.7530   1
   4  -9   7 186.768 25.0278  -2
  -4   9   5 186.768 25.0278   1
  -3   9   5 14.8608 14.8769   1
   2  -9   8 324.845 30.3000  -2
  -2   9   5 324.845 30.3000   1
  -1   9   5 9.06030 12.9720   1
   0  -9   9 130.653 23.8024  -2
   0   9   5 130.653 23.8024   1
  -1  -9   9 279.948 30.1078  -2
   1   9   5 279.948 30.1078   1
  -2  -9  10 286.998 70.0571  -2
   2   9   5 286.998 70.0571   1
   2 -10   8 41.1031 63.4644  -2
  -2  10   5 41.1031 63.4644   1
   1 -10   9 459.295 33.5896  -2
  -1  10   5 459.295 33.5896   1
   0 -10   9 224.082 29.8886  -2
   0  10   5 224.082 29.8886   1
   1  10   5 12.7700 14.5127   1
  -2 -11   6 143.410 22.3165   1
   1  11   1 398.885 43.5874  -2
  -1 -11   6 398.885 43.5874   1
   0 -11   6 49.2625 22.1626   1
  -1  11   2 1166.34 63.1288  -2
   1 -11   6 1166.34 63.1288   1
  -2  11   2 227.912 37.3445  -2
   2 -11   6 227.912 37.3445   1
   4  10   0 105.539 30.2955  -2
  -4 -10   6 105.539 30.2955   1
   3  10   0 153.137 62.1873  -2
  -3 -10   6 153.137 62.1873   1
   2  10   1 577.782 34.0092  -2
  -2 -10   6 577.782 34.0092   1
   1  10   1 247.256 34.1728  -2
  -1 -10   6 247.256 34.1728   1
   0  10   2 11.3960 33.3341  -2
   0 -10   6 11.3960 33.3341   1
  -1  10   2 302.478 29.9876  -2
   1 -10   6 302.478 29.9876   1
  -2  10   3 44.1606 62.9918  -2
   2 -10   6 44.1606 62.9918   1
  -3  10   3 220.125 26.3563  -2
   3 -10   6 220.125 26.3563   1
   4 -10   6 -0.2995 16.5976   1
   5   9   0 157.054 37.8173  -2
  -5  -9   6 157.054 37.8173   1
   4   9   0 870.127 54.2963  -2
  -4  -9   6 870.127 54.2963   1
   3   9   1 74.6885 27.5990  -2
  -3  -9   6 74.6885 27.5990   1
   2   9   1 391.619 26.3349  -2
  -2  -9   6 391.619 26.3349   1
   1   9   2 347.352 47.8160  -2
  -1  -9   6 347.352 47.8160   1
   0   9   2 67.0486 23.9222  -2
   0  -9   6 67.0486 23.9222   1
   1  -9   6 352.524 21.1726   1
  -2   9   3 846.895 34.0813  -2
   2  -9   6 846.895 34.0813   1
   3  -9   6 134.222 16.1940   1
  -4   9   4 366.956 23.7924  -2
   4  -9   6 366.956 23.7924   1
   5  -9   6 14.9517 19.8295   1
   6   8   0 168.862 64.6486  -2
  -6  -8   6 168.862 64.6486   1
   5   8   0 268.793 44.9842  -2
  -5  -8   6 268.793 44.9842   1
   4   8   1 -0.6674 26.1982  -2
  -4  -8   6 -0.6674 26.1982   1
   3   8   1 325.308 26.9285  -2
  -3  -8   6 325.308 26.9285   1
   2   8   2 743.784 47.3603  -2
  -2  -8   6 743.784 47.3603   1
   1   8   2 66.9655 19.8434  -2
  -1  -8   6 66.9655 19.8434   1
   0  -8   6 1252.57 32.6158   1
  -1   8   3 82.3089 20.1419  -2
   1  -8   6 82.3089 20.1419   1
   2  -8   6 1006.14 29.2275   1
  -3   8   4 871.275 26.3904  -2
   3  -8   6 871.275 26.3904   1
   4  -8   6 241.174 18.3471   1
  -5   8   5 490.855 29.8672  -2
   5  -8   6 490.855 29.8672   1
   6   7   0 236.168 34.3434  -2
  -6  -7   6 236.168 34.3434   1
   5   7   1 208.614 37.3110  -2
  -5  -7   6 208.614 37.3110   1
   4   7   1 793.184 34.5723  -2
  -4  -7   6 793.184 34.5723   1
   3   7   2 25.2528 63.1578  -2
  -3  -7   6 25.2528 63.1578   1
   2   7   2 1612.19 35.4224  -2
  -2  -7   6 1612.19 35.4224   1
  -1  -7   6 -0.4198 8.23067   1
   0   7   3 421.276 15.3312  -2
   0  -7   6 421.276 15.3312   1
   1  -7   6 99.7032 10.5674   1
  -2   7   4 620.218 22.1003  -2
   2  -7   6 620.218 22.1003   1
   3  -7   6 0.25179 9.37037   1
  -4   7   5 1089.54 35.0729  -2
   4  -7   6 1089.54 35.0729   1
  -5   7   5 100.987 37.8617  -2
   5  -7   6 100.987 37.8617   1
  -6   7   6 210.282 41.8164  -2
   6  -7   6 210.282 41.8164   1
   7   6   0 259.554 36.7435  -2
  -7  -6   6 259.554 36.7435   1
   6   6   1 151.199 48.4547  -2
  -6  -6   6 151.199 48.4547   1
   5   6   1 894.855 35.4246  -2
  -5  -6   6 894.855 35.4246   1
   4   6   2 90.5981 87.9674  -2
  -4  -6   6 90.5981 87.9674   1
   3   6   2 1107.08 29.5309  -2
  -3  -6   6 1107.08 29.5309   1
   2   6   3 0.78629 48.0552  -2
  -2  -6   6 0.78629 48.0552   1
   1   6   3 281.194 13.8143  -2
  -1  -6   6 281.194 13.8143   1
   0  -6   6 82.2589 8.67942   1
  -1   6   4 200.160 13.8820  -2
   1  -6   6 200.160 13.8820   1
   2  -6   6 398.020 16.6775   1
  -3   6   5 560.512 26.0078  -2
   3  -6   6 560.512 26.0078   1
  -4   6   5 84.0611 30.5202  -2
   4  -6   6 84.0611 30.5202   1
  -5   6   6 129.835 28.0857  -2
   5  -6   6 129.835 28.0857   1
  -6   6   6 429.836 35.9024  -2
   6  -6   6 429.836 35.9024   1
   7   5   1 331.579 66.0496  -2
  -7  -5   6 331.579 66.0496   1
   6   5   1 333.041 25.2849  -2
  -6  -5   6 333.041 25.2849   1
  -5  -5   6 228.241 17.4145   1
   4   5   2 193.949 16.6799  -2
  -4  -5   6 193.949 16.6799   1
   3   5   2 722.144 96.2572  -2
  -3  -5   6 722.144 96.2572   1
   2   5   3 467.209 13.8179  -2
  -2  -5   6 467.209 13.8179   1
   1   5   3 1876.41 113.746  -2
  -1  -5   6 1876.41 113.746   1
   0   5   4 262.051 13.6197  -2
   0  -5   6 262.051 13.6197   1
   1  -5   6 2713.97 41.3727   1
  -2   5   5 216.730 15.3723  -2
   2  -5   6 216.730 15.3723   1
  -3   5   5 750.339 26.7769  -2
   3  -5   6 750.339 26.7769   1
  -4   5   6 1094.66 40.7836  -2
   4  -5   6 1094.66 40.7836   1
  -5   5   6 49.6003 24.7127  -2
   5  -5   6 49.6003 24.7127   1
  -6   5   7 560.337 84.4013  -2
   6  -5   6 560.337 84.4013   1
  -7   5   7 144.195 55.3109  -2
   7  -5   6 144.195 55.3109   1
  -8  -4   6 275.432 52.6818   1
   7   4   1 244.006 27.2923  -2
  -7  -4   6 244.006 27.2923   1
  -6  -4   6 644.014 29.5105   1
   5   4   2 2376.76 51.5915  -2
  -5  -4   6 2376.76 51.5915   1
  -4  -4   6 214.215 12.2862   1
   3   4   3 2009.52 35.1078  -2
  -3  -4   6 2009.52 35.1078   1
   2   4   3 439.321 76.7627  -2
  -2  -4   6 439.321 76.7627   1
   1   4   4 776.654 17.5226  -2
  -1  -4   6 776.654 17.5226   1
   0   4   4 24.2705 41.2059  -2
   0  -4   6 24.2705 41.2059   1
  -1   4   5 1119.19 24.1786  -2
   1  -4   6 1119.19 24.1786   1
  -2   4   5 453.053 19.2028  -2
   2  -4   6 453.053 19.2028   1
   3  -4   6 309.752 11.1718   1
  -4   4   6 564.362 23.1987  -2
   4  -4   6 564.362 23.1987   1
   5  -4   6 713.510 23.5386   1
  -6   4   7 55.6661 19.0238  -2
   6  -4   6 55.6661 19.0238   1
   7  -4   6 102.828 18.1657   1
   8   3   1 91.2341 30.8201  -2
  -8  -3   6 91.2341 30.8201   1
  -7  -3   6 43.2578 13.5572   1
   6   3   2 56.5307 17.1939  -2
  -6  -3   6 56.5307 17.1939   1
  -5  -3   6 282.521 17.4430   1
   4   3   3 973.961 26.7622  -2
  -4  -3   6 973.961 26.7622   1
   3   3   3 198.901 77.0020  -2
  -3  -3   6 198.901 77.0020   1
   2   3   4 596.765 16.7585  -2
  -2  -3   6 596.765 16.7585   1
   1   3   4 4951.87 113.039  -2
  -1  -3   6 4951.87 113.039   1
   0   3   5 430.941 31.1545  -2
   0  -3   6 430.941 31.1545   1
  -1   3   5 1964.52 35.2489  -2
   1  -3   6 1964.52 35.2489   1
   2  -3   6 117.244 7.00033   1
  -3   3   6 487.741 18.0824  -2
   3  -3   6 487.741 18.0824   1
   4  -3   6 315.922 13.4287   1
  -5   3   7 558.561 20.0544  -2
   5  -3   6 558.561 20.0544   1
   6  -3   6 85.5104 13.6221   1
  -7   3   8 189.917 26.1064  -2
   7  -3   6 189.917 26.1064   1
  -8  -2   6 168.175 17.8086   1
   7   2   2 -2.5561 18.3835  -2
  -7  -2   6 -2.5561 18.3835   1
  -6  -2   6 482.804 21.2230   1
   5   2   3 840.624 26.4451  -2
  -5  -2   6 840.624 26.4451   1
  -4  -2   6 70.6703 8.50791   1
   3   2   4 763.964 30.5417  -2
  -3  -2   6 763.964 30.5417   1
   2   2   4 562.203 23.0136  -2
  -2  -2   6 562.203 23.0136   1
   1   2   5 127.869 48.0819  -2
  -1  -2   6 127.869 48.0819   1
   0   2   5 3899.30 52.3527  -2
   0  -2   6 3899.30 52.3527   1
   1  -2   6 6.10713 5.07851   1
  -2   2   6 2716.64 45.6917  -2
   2  -2   6 2716.64 45.6917   1
   3  -2   6 626.910 16.4555   1
  -4   2   7 770.383 19.6960  -2
   4  -2   6 770.383 19.6960   1
   5  -2   6 1127.87 28.6022   1
  -6   2   8 124.664 20.0928  -2
   6  -2   6 124.664 20.0928   1
   7  -2   6 289.451 23.0058   1
   8   1   2 171.263 24.1598  -2
  -8  -1   6 171.263 24.1598   1
  -7  -1   6 532.159 23.8200   1
   6   1   3 180.891 20.5910  -2
  -6  -1   6 180.891 20.5910   1
   5   1   3 259.426 33.4638  -2
  -5  -1   6 259.426 33.4638   1
   4   1   4 1377.42 60.3636  -2
  -4  -1   6 1377.42 60.3636   1
   3   1   4 345.127 14.3164  -2
  -3  -1   6 345.127 14.3164   1
  -2  -1   6 4604.25 67.0256   1
   1   1   5 3932.69 65.8846  -2
  -1  -1   6 3932.69 65.8846   1
   0  -1   6 3040.65 41.1879   1
  -1   1   6 839.112 16.2592  -2
   1  -1   6 839.112 16.2592   1
   2  -1   6 0.14238 5.35573   1
  -3   1   7 44.4590 11.5511  -2
   3  -1   6 44.4590 11.5511   1
   4  -1   6 513.193 17.0489   1
  -5   1   8 915.346 28.7710  -2
   5  -1   6 915.346 28.7710   1
   6  -1   6 209.221 17.0217   1
  -7   1   9 105.508 29.1484  -2
   7  -1   6 105.508 29.1484   1
   8   0   2 353.084 38.0633  -2
  -8   0   6 353.084 38.0633   1
   7   0   3 275.450 25.4769  -2
  -7   0   6 275.450 25.4769   1
   6   0   3 306.384 22.8165  -2
  -6   0   6 306.384 22.8165   1
   5   0   4 466.535 34.0628  -2
  -5   0   6 466.535 34.0628   1
   4   0   4 983.299 23.3027  -2
  -4   0   6 983.299 23.3027   1
  -3   0   6 1056.41 19.1654   1
   2   0   5 718.092 16.4646  -2
  -2   0   6 718.092 16.4646   1
  -1   0   6 76.7245 6.44200   1
   0   0   6 982.809 16.9421  -2
   0   0   6 982.809 16.9421   1
   1   0   6 9.09640 3.46727   1
  -2   0   7 928.834 20.4069  -2
   2   0   6 928.834 20.4069   1
   3   0   6 67.0689 7.69149   1
  -4   0   8 493.189 23.9560  -2
   4   0   6 493.189 23.9560   1
  -5   0   8 438.038 40.4871  -2
   5   0   6 438.038 40.4871   1
  -6   0   9 349.728 34.4613  -2
   6   0   6 349.728 34.4613   1
  -7   0   9 4.91264 31.9379  -2
   7   0   6 4.91264 31.9379   1
   8  -1   3 39.2260 33.9401  -2
  -8   1   6 39.2260 33.9401   1
   7  -1   3 348.021 32.7038  -2
  -7   1   6 348.021 32.7038   1
   6  -1   4 408.382 74.1731  -2
  -6   1   6 408.382 74.1731   1
   5  -1   4 280.807 17.2660  -2
  -5   1   6 280.807 17.2660   1
  -4   1   6 -0.4996 5.78003   1
   3  -1   5 397.297 12.4412  -2
  -3   1   6 397.297 12.4412   1
  -2   1   6 104.892 6.10295   1
   1  -1   6 1139.19 21.6775  -2
  -1   1   6 1139.19 21.6775   1
   0   1   6 133.721 6.58561   1
  -1  -1   7 3272.33 52.9912  -2
   1   1   6 3272.33 52.9912   1
   2   1   6 305.514 11.7706   1
  -3  -1   8 480.437 22.6628  -2
   3   1   6 480.437 22.6628   1
  -4  -1   8 1218.80 48.7321  -2
   4   1   6 1218.80 48.7321   1
  -5  -1   9 509.316 34.3417  -2
   5   1   6 509.316 34.3417   1
  -6  -1   9 733.538 36.9626  -2
   6   1   6 733.538 36.9626   1
   7   1   6 11.8509 15.2076   1
   8  -2   3 637.578 40.0592  -2
  -8   2   6 637.578 40.0592   1
  -7   2   6 21.0228 13.5770   1
   6  -2   4 419.343 22.0566  -2
  -6   2   6 419.343 22.0566   1
  -5   2   6 978.928 23.1593   1
   4  -2   5 538.010 15.8535  -2
  -4   2   6 538.010 15.8535   1
  -3   2   6 2260.95 37.0745   1
   2  -2   6 1934.10 32.4675  -2
  -2   2   6 1934.10 32.4675   1
  -1   2   6 1004.87 18.9616   1
   0  -2   7 177.255 10.5650  -2
   0   2   6 177.255 10.5650   1
  -1  -2   7 1007.03 56.4025  -2
   1   2   6 1007.03 56.4025   1
  -2  -2   8 864.636 26.3997  -2
   2   2   6 864.636 26.3997   1
  -3  -2   8 -18.161 18.8296  -2
   3   2   6 -18.161 18.8296   1
  -4  -2   9 675.874 74.2096  -2
   4   2   6 675.874 74.2096   1
  -5  -2   9 637.586 32.3216  -2
   5   2   6 637.586 32.3216   1
   6   2   6 21.3964 14.1111   1
  -8   3   6 136.098 18.8160   1
   7  -3   4 212.944 22.7784  -2
  -7   3   6 212.944 22.7784   1
  -6   3   6 30.4800 10.1531   1
   5  -3   5 449.464 18.8331  -2
  -5   3   6 449.464 18.8331   1
  -4   3   6 264.365 11.6827   1
   3  -3   6 461.495 16.7231  -2
  -3   3   6 461.495 16.7231   1
  -2   3   6 82.3004 7.52090   1
   1  -3   7 329.072 14.1010  -2
  -1   3   6 329.072 14.1010   1
   0  -3   7 630.675 30.7091  -2
   0   3   6 630.675 30.7091   1
  -1  -3   8 1127.55 28.7479  -2
   1   3   6 1127.55 28.7479   1
  -2  -3   8 996.104 24.9378  -2
   2   3   6 996.104 24.9378   1
  -3  -3   9 545.305 68.8797  -2
   3   3   6 545.305 68.8797   1
  -4  -3   9 31.6898 20.7236  -2
   4   3   6 31.6898 20.7236   1
   5   3   6 23.3193 13.0669   1
  -6  -3  10 5.48610 24.5476  -2
   6   3   6 5.48610 24.5476   1
  -7   4   6 18.8249 13.7879   1
   6  -4   5 484.211 26.2168  -2
  -6   4   6 484.211 26.2168   1
  -5   4   6 30.0619 11.7482   1
   4  -4   6 480.149 28.0394  -2
  -4   4   6 480.149 28.0394   1
  -3   4   6 42.0277 9.22823   1
   2  -4   7 1670.10 38.7878  -2
  -2   4   6 1670.10 38.7878   1
   1  -4   7 373.114 16.2470  -2
  -1   4   6 373.114 16.2470   1
   0  -4   8 1270.44 60.1900  -2
   0   4   6 1270.44 60.1900   1
  -1  -4   8 246.240 11.9442  -2
   1   4   6 246.240 11.9442   1
  -2  -4   9 608.456 76.9702  -2
   2   4   6 608.456 76.9702   1
  -3  -4   9 326.280 20.0900  -2
   3   4   6 326.280 20.0900   1
   4   4   6 313.421 19.2697   1
  -5  -4  10 593.068 31.6493  -2
   5   4   6 593.068 31.6493   1
   6   4   6 108.199 20.2877   1
   7  -5   5 352.020 33.3193  -2
  -7   5   6 352.020 33.3193   1
  -6   5   6 31.7338 15.3650   1
   5  -5   6 82.4723 27.1691  -2
  -5   5   6 82.4723 27.1691   1
   4  -5   6 1094.16 46.4088  -2
  -4   5   6 1094.16 46.4088   1
   3  -5   7 63.4350 34.6723  -2
  -3   5   6 63.4350 34.6723   1
   2  -5   7 1864.68 42.7900  -2
  -2   5   6 1864.68 42.7900   1
  -1   5   6 149.837 8.87680   1
   0  -5   8 1347.21 34.3479  -2
   0   5   6 1347.21 34.3479   1
   1   5   6 61.8436 6.50954   1
  -2  -5   9 1323.43 32.9678  -2
   2   5   6 1323.43 32.9678   1
   3   5   6 193.822 15.5147   1
  -4  -5  10 369.472 27.3374  -2
   4   5   6 369.472 27.3374   1
   5   5   6 162.264 20.5552   1
   7  -6   5 580.857 96.1766  -2
  -7   6   6 580.857 96.1766   1
   6  -6   6 540.835 39.3789  -2
  -6   6   6 540.835 39.3789   1
   5  -6   6 45.8775 29.5938  -2
  -5   6   6 45.8775 29.5938   1
   4  -6   7 338.148 34.1856  -2
  -4   6   6 338.148 34.1856   1
   3  -6   7 319.408 26.2206  -2
  -3   6   6 319.408 26.2206   1
  -2   6   6 5.21083 8.39547   1
   1  -6   8 151.456 15.8228  -2
  -1   6   6 151.456 15.8228   1
   0   6   6 381.340 15.5972   1
  -1  -6   9 213.210 14.4847  -2
   1   6   6 213.210 14.4847   1
   2   6   6 393.202 17.6310   1
  -3  -6  10 343.260 25.5630  -2
   3   6   6 343.260 25.5630   1
   4   6   6 152.761 18.7127   1
   6  -7   6 175.501 34.2039  -2
  -6   7   6 175.501 34.2039   1
   5  -7   7 345.161 47.7364  -2
  -5   7   6 345.161 47.7364   1
   4  -7   7 61.9864 26.9852  -2
  -4   7   6 61.9864 26.9852   1
  -3   7   6 8.82061 11.3358   1
   2  -7   8 375.680 23.5617  -2
  -2   7   6 375.680 23.5617   1
  -1   7   6 275.670 15.6119   1
   0  -7   9 25.3108 15.7143  -2
   0   7   6 25.3108 15.7143   1
   1   7   6 478.727 23.4156   1
  -2  -7  10 444.098 27.2201  -2
   2   7   6 444.098 27.2201   1
   3   7   6 118.052 16.0891   1
   5  -8   7 575.164 41.6095  -2
  -5   8   6 575.164 41.6095   1
  -4   8   6 15.0781 14.3366   1
   3  -8   8 663.168 28.6517  -2
  -3   8   6 663.168 28.6517   1
  -2   8   6 43.6854 12.1071   1
   1  -8   9 752.586 31.9529  -2
  -1   8   6 752.586 31.9529   1
   0   8   6 32.8615 15.4383   1
  -1  -8  10 199.607 51.7991  -2
   1   8   6 199.607 51.7991   1
  -2  -8  10 351.958 25.0283  -2
   2   8   6 351.958 25.0283   1
  -3   9   6 269.108 23.3471   1
   2  -9   9 108.523 25.7567  -2
  -2   9   6 108.523 25.7567   1
  -1   9   6 22.8673 10.5109   1
   0  -9  10 19.8840 54.3920  -2
   0   9   6 19.8840 54.3920   1
  -2 -11   7 112.511 31.8702   1
   1  11   2 306.092 54.7708  -2
  -1 -11   7 306.092 54.7708   1
   0  11   2 12.3919 47.8105  -2
   0 -11   7 12.3919 47.8105   1
  -1  11   3 162.415 64.0446  -2
   1 -11   7 162.415 64.0446   1
   3  10   1 480.246 97.8056  -2
  -3 -10   7 480.246 97.8056   1
   2  10   2 104.056 31.5834  -2
  -2 -10   7 104.056 31.5834   1
   1  10   2 200.565 36.6760  -2
  -1 -10   7 200.565 36.6760   1
   0  10   3 991.730 48.2213  -2
   0 -10   7 991.730 48.2213   1
  -1  10   3 75.3513 28.9891  -2
   1 -10   7 75.3513 28.9891   1
  -2  10   4 632.600 49.4321  -2
   2 -10   7 632.600 49.4321   1
  -3  10   4 299.034 32.5205  -2
   3 -10   7 299.034 32.5205   1
   5   9   1 363.531 48.2799  -2
  -5  -9   7 363.531 48.2799   1
   4   9   1 392.145 39.7089  -2
  -4  -9   7 392.145 39.7089   1
   3   9   2 144.878 26.3824  -2
  -3  -9   7 144.878 26.3824   1
   2   9   2 86.9209 25.2092  -2
  -2  -9   7 86.9209 25.2092   1
   1   9   3 409.818 42.3638  -2
  -1  -9   7 409.818 42.3638   1
   0   9   3 282.272 28.0518  -2
   0  -9   7 282.272 28.0518   1
   1  -9   7 223.004 19.2030   1
  -2   9   4 37.0443 21.4549  -2
   2  -9   7 37.0443 21.4549   1
   3  -9   7 26.9823 14.1281   1
  -4   9   5 188.856 24.9591  -2
   4  -9   7 188.856 24.9591   1
   5   8   1 344.528 42.7248  -2
  -5  -8   7 344.528 42.7248   1
   4   8   2 167.579 33.3616  -2
  -4  -8   7 167.579 33.3616   1
   3   8   2 264.733 27.2632  -2
  -3  -8   7 264.733 27.2632   1
   2   8   3 485.692 51.1335  -2
  -2  -8   7 485.692 51.1335   1
   1   8   3 230.913 25.6953  -2
  -1  -8   7 230.913 25.6953   1
   0  -8   7 37.0452 13.1808   1
  -1   8   4 181.883 22.4237  -2
   1  -8   7 181.883 22.4237   1
   2  -8   7 2.03841 10.5495   1
  -3   8   5 479.614 22.1574  -2
   3  -8   7 479.614 22.1574   1
   4  -8   7 18.5765 13.9823   1
  -5   8   6 703.243 40.4623  -2
   5  -8   7 703.243 40.4623   1
   6   7   1 236.117 46.5967  -2
  -6  -7   7 236.117 46.5967   1
   5   7   2 123.183 39.7602  -2
  -5  -7   7 123.183 39.7602   1
   4   7   2 1630.15 49.2132  -2
  -4  -7   7 1630.15 49.2132   1
   3   7   3 600.876 60.2208  -2
  -3  -7   7 600.876 60.2208   1
   2   7   3 755.986 28.0880  -2
  -2  -7   7 755.986 28.0880   1
  -1  -7   7 864.896 29.8941   1
   0   7   4 506.404 22.9249  -2
   0  -7   7 506.404 22.9249   1
   1  -7   7 1017.88 30.7150   1
  -2   7   5 362.961 21.5031  -2
   2  -7   7 362.961 21.5031   1
   3  -7   7 843.719 25.9466   1
  -4   7   6 29.5538 24.3444  -2
   4  -7   7 29.5538 24.3444   1
  -5   7   6 412.023 57.9752  -2
   5  -7   7 412.023 57.9752   1
   6   6   2 736.850 63.8061  -2
  -6  -6   7 736.850 63.8061   1
   5   6   2 67.5701 29.3153  -2
  -5  -6   7 67.5701 29.3153   1
   4   6   3 542.592 100.504  -2
  -4  -6   7 542.592 100.504   1
   3   6   3 229.156 19.6656  -2
  -3  -6   7 229.156 19.6656   1
   2   6   4 1120.54 102.062  -2
  -2  -6   7 1120.54 102.062   1
   1   6   4 658.977 21.5456  -2
  -1  -6   7 658.977 21.5456   1
   0  -6   7 527.436 19.8751   1
  -1   6   5 597.651 21.7293  -2
   1  -6   7 597.651 21.7293   1
   2  -6   7 394.829 18.7750   1
  -3   6   6 320.043 28.5333  -2
   3  -6   7 320.043 28.5333   1
  -4   6   6 246.891 32.0161  -2
   4  -6   7 246.891 32.0161   1
  -5   6   7 393.044 32.8968  -2
   5  -6   7 393.044 32.8968   1
  -6   6   7 249.682 32.7664  -2
   6  -6   7 249.682 32.7664   1
   7   5   2 -116.13 72.0504  -2
  -7  -5   7 -116.13 72.0504   1
   6   5   2 25.9748 31.0657  -2
  -6  -5   7 25.9748 31.0657   1
  -5  -5   7 2.84953 11.8441   1
   4   5   3 1455.49 41.9110  -2
  -4  -5   7 1455.49 41.9110   1
  -3  -5   7 17.2729 8.86977   1
   2   5   4 1124.75 26.8414  -2
  -2  -5   7 1124.75 26.8414   1
  -1  -5   7 2.62083 7.63998   1
   0   5   5 382.307 18.7200  -2
   0  -5   7 382.307 18.7200   1
   1  -5   7 2.36681 7.55611   1
  -2   5   6 1579.45 35.5004  -2
   2  -5   7 1579.45 35.5004   1
  -3   5   6 50.9717 21.4180  -2
   3  -5   7 50.9717 21.4180   1
  -4   5   7 1011.47 40.1966  -2
   4  -5   7 1011.47 40.1966   1
  -5   5   7 305.659 29.5936  -2
   5  -5   7 305.659 29.5936   1
   6  -5   7 350.377 20.3253   1
   7   4   2 238.820 29.4995  -2
  -7  -4   7 238.820 29.4995   1
  -6  -4   7 84.6153 15.2335   1
   5   4   3 260.474 19.5564  -2
  -5  -4   7 260.474 19.5564   1
  -4  -4   7 66.2091 11.1117   1
   3   4   4 560.203 18.3958  -2
  -3  -4   7 560.203 18.3958   1
   2   4   4 584.467 84.7791  -2
  -2  -4   7 584.467 84.7791   1
   1   4   5 459.334 17.6932  -2
  -1  -4   7 459.334 17.6932   1
   0  -4   7 2158.41 38.5541   1
  -1   4   6 435.839 17.9602  -2
   1  -4   7 435.839 17.9602   1
  -2   4   6 2463.26 42.8276  -2
   2  -4   7 2463.26 42.8276   1
  -3   4   7 771.236 79.2056  -2
   3  -4   7 771.236 79.2056   1
  -4   4   7 453.961 23.0769  -2
   4  -4   7 453.961 23.0769   1
   5  -4   7 107.168 13.1311   1
  -6   4   8 667.289 30.7246  -2
   6  -4   7 667.289 30.7246   1
   7  -4   7 146.235 44.3853   1
  -7  -3   7 465.600 23.5815   1
   6   3   3 293.606 21.7906  -2
  -6  -3   7 293.606 21.7906   1
  -5  -3   7 751.285 24.5153   1
   4   3   4 534.916 22.6118  -2
  -4  -3   7 534.916 22.6118   1
   3   3   4 2184.91 145.335  -2
  -3  -3   7 2184.91 145.335   1
   2   3   5 1283.81 27.7988  -2
  -2  -3   7 1283.81 27.7988   1
   1   3   5 456.807 20.6084  -2
  -1  -3   7 456.807 20.6084   1
   0   3   6 685.120 45.4386  -2
   0  -3   7 685.120 45.4386   1
  -1   3   6 481.775 17.9738  -2
   1  -3   7 481.775 17.9738   1
   2  -3   7 23.7843 7.43390   1
  -3   3   7 203.580 16.5598  -2
   3  -3   7 203.580 16.5598   1
   4  -3   7 273.619 13.5761   1
  -5   3   8 83.1769 15.6000  -2
   5  -3   7 83.1769 15.6000   1
   6  -3   7 290.424 18.0982   1
  -7   3   9 57.9673 53.4870  -2
   7  -3   7 57.9673 53.4870   1
  -8  -2   7 23.4681 14.5377   1
   7   2   3 513.276 29.2816  -2
  -7  -2   7 513.276 29.2816   1
  -6  -2   7 -10.852 11.4097   1
   5   2   4 1145.51 34.9882  -2
  -5  -2   7 1145.51 34.9882   1
  -4  -2   7 70.0914 10.5702   1
   3   2   5 1051.19 29.5298  -2
  -3  -2   7 1051.19 29.5298   1
   2   2   5 1157.42 24.0015  -2
  -2  -2   7 1157.42 24.0015   1
   1   2   6 1020.39 78.9305  -2
  -1  -2   7 1020.39 78.9305   1
   0   2   6 139.958 10.7155  -2
   0  -2   7 139.958 10.7155   1
   1  -2   7 147.959 8.43716   1
  -2   2   7 330.941 15.9329  -2
   2  -2   7 330.941 15.9329   1
   3  -2   7 428.279 14.9495   1
  -4   2   8 312.660 16.2048  -2
   4  -2   7 312.660 16.2048   1
   5  -2   7 832.017 25.6608   1
  -6   2   9 334.409 27.7329  -2
   6  -2   7 334.409 27.7329   1
   7  -2   7 218.303 27.7594   1
   8   1   3 -35.497 25.6444  -2
  -8  -1   7 -35.497 25.6444   1
  -7  -1   7 104.433 15.1530   1
   6   1   4 679.595 32.0658  -2
  -6  -1   7 679.595 32.0658   1
   5   1   4 327.976 36.5232  -2
  -5  -1   7 327.976 36.5232   1
   4   1   5 939.887 54.7887  -2
  -4  -1   7 939.887 54.7887   1
   3   1   5 1186.01 27.6338  -2
  -3  -1   7 1186.01 27.6338   1
  -2  -1   7 706.071 17.1694   1
   1   1   6 2981.67 52.7076  -2
  -1  -1   7 2981.67 52.7076   1
   0  -1   7 61.5178 5.47105   1
  -1   1   7 2683.65 48.4880  -2
   1  -1   7 2683.65 48.4880   1
   2  -1   7 35.8038 7.77986   1
  -3   1   8 2075.35 38.7635  -2
   3  -1   7 2075.35 38.7635   1
   4  -1   7 131.153 11.1361   1
  -5   1   9 660.846 29.5028  -2
   5  -1   7 660.846 29.5028   1
   6  -1   7 191.861 18.3264   1
   8   0   3 450.320 42.9919  -2
  -8   0   7 450.320 42.9919   1
   7   0   4 114.318 26.8701  -2
  -7   0   7 114.318 26.8701   1
   6   0   4 1037.85 35.5066  -2
  -6   0   7 1037.85 35.5066   1
   5   0   5 1440.65 71.8339  -2
  -5   0   7 1440.65 71.8339   1
   4   0   5 666.778 24.9952  -2
  -4   0   7 666.778 24.9952   1
  -3   0   7 637.343 17.2436   1
   2   0   6 670.665 16.7794  -2
  -2   0   7 670.665 16.7794   1
  -1   0   7 2009.57 37.0664   1
   0   0   7 127.837 7.82005  -2
   0   0   7 127.837 7.82005   1
   1   0   7 643.216 14.7431   1
  -2   0   8 101.369 14.9129  -2
   2   0   7 101.369 14.9129   1
   3   0   7 69.6916 10.5056   1
  -4   0   9 119.680 23.9170  -2
   4   0   7 119.680 23.9170   1
  -5   0   9 794.076 86.3016  -2
   5   0   7 794.076 86.3016   1
  -6   0  10 13.3243 30.3333  -2
   6   0   7 13.3243 30.3333   1
   8  -1   4 120.180 43.9239  -2
  -8   1   7 120.180 43.9239   1
   7  -1   4 78.4318 28.9603  -2
  -7   1   7 78.4318 28.9603   1
  -6   1   7 21.8486 10.3061   1
   5  -1   5 66.7711 16.2411  -2
  -5   1   7 66.7711 16.2411   1
  -4   1   7 310.319 14.2572   1
   3  -1   6 44.9599 12.2180  -2
  -3   1   7 44.9599 12.2180   1
  -2   1   7 445.855 11.5559   1
   1  -1   7 1864.01 38.8151  -2
  -1   1   7 1864.01 38.8151   1
   0   1   7 292.996 11.5485   1
  -1  -1   8 439.473 20.6092  -2
   1   1   7 439.473 20.6092   1
   2   1   7 76.1296 11.4264   1
  -3  -1   9 555.851 26.1102  -2
   3   1   7 555.851 26.1102   1
  -4  -1   9 417.807 32.8448  -2
   4   1   7 417.807 32.8448   1
  -5  -1  10 296.710 34.3452  -2
   5   1   7 296.710 34.3452   1
  -6  -1  10 65.9902 31.8185  -2
   6   1   7 65.9902 31.8185   1
   8  -2   4 25.6923 51.5956  -2
  -8   2   7 25.6923 51.5956   1
  -7   2   7 -5.9491 13.5236   1
   6  -2   5 199.734 20.5713  -2
  -6   2   7 199.734 20.5713   1
  -5   2   7 151.377 12.2786   1
   4  -2   6 604.879 18.6171  -2
  -4   2   7 604.879 18.6171   1
  -3   2   7 313.925 15.2375   1
   2  -2   7 416.517 18.7211  -2
  -2   2   7 416.517 18.7211   1
  -1   2   7 44.3978 8.57047   1
   0  -2   8 1858.03 40.1274  -2
   0   2   7 1858.03 40.1274   1
  -1  -2   8 453.223 42.2891  -2
   1   2   7 453.223 42.2891   1
  -2  -2   9 1197.20 35.8054  -2
   2   2   7 1197.20 35.8054   1
  -3  -2   9 1256.37 39.0129  -2
   3   2   7 1256.37 39.0129   1
  -4  -2  10 711.177 88.4905  -2
   4   2   7 711.177 88.4905   1
  -5  -2  10 176.351 29.4213  -2
   5   2   7 176.351 29.4213   1
   6   2   7 2.47566 14.6313   1
   7  -3   5 601.582 36.4103  -2
  -7   3   7 601.582 36.4103   1
  -6   3   7 26.9521 13.6056   1
   5  -3   6 737.633 28.0965  -2
  -5   3   7 737.633 28.0965   1
  -4   3   7 472.251 22.2555   1
   3  -3   7 274.003 21.3003  -2
  -3   3   7 274.003 21.3003   1
  -2   3   7 1243.85 30.3099   1
   1  -3   8 1051.90 31.7034  -2
  -1   3   7 1051.90 31.7034   1
   0  -3   8 1490.97 34.4696  -2
   0   3   7 1490.97 34.4696   1
  -1  -3   9 527.611 25.8223  -2
   1   3   7 527.611 25.8223   1
  -2  -3   9 55.0883 18.6940  -2
   2   3   7 55.0883 18.6940   1
  -3  -3  10 5.12013 58.9987  -2
   3   3   7 5.12013 58.9987   1
  -4  -3  10 261.057 25.1124  -2
   4   3   7 261.057 25.1124   1
   5   3   7 48.4611 14.3678   1
  -7   4   7 116.021 21.0891   1
   6  -4   6 104.946 25.9117  -2
  -6   4   7 104.946 25.9117   1
  -5   4   7 68.7358 16.6999   1
   4  -4   7 391.737 28.6811  -2
  -4   4   7 391.737 28.6811   1
  -3   4   7 806.992 27.3280   1
   2  -4   8 54.8028 18.8408  -2
  -2   4   7 54.8028 18.8408   1
   1  -4   8 818.788 28.2338  -2
  -1   4   7 818.788 28.2338   1
   0  -4   9 43.4477 54.8674  -2
   0   4   7 43.4477 54.8674   1
  -1  -4   9 81.8099 16.9461  -2
   1   4   7 81.8099 16.9461   1
   2   4   7 200.203 13.3086   1
  -3  -4  10 399.013 24.4962  -2
   3   4   7 399.013 24.4962   1
   4   4   7 165.694 17.0565   1
  -5  -4  11 280.346 27.9843  -2
   5   4   7 280.346 27.9843   1
   7  -5   6 138.358 41.4927  -2
  -7   5   7 138.358 41.4927   1
   6  -5   6 549.599 81.5847  -2
  -6   5   7 549.599 81.5847   1
   5  -5   7 426.152 33.4936  -2
  -5   5   7 426.152 33.4936   1
   4  -5   7 706.950 35.9931  -2
  -4   5   7 706.950 35.9931   1
   3  -5   8 186.905 26.3187  -2
  -3   5   7 186.905 26.3187   1
   2  -5   8 45.6945 18.8456  -2
  -2   5   7 45.6945 18.8456   1
  -1   5   7 386.526 16.7231   1
   0  -5   9 662.457 21.1619  -2
   0   5   7 662.457 21.1619   1
   1   5   7 883.446 34.3651   1
  -2  -5  10 278.207 17.7497  -2
   2   5   7 278.207 17.7497   1
   3   5   7 815.681 32.0366   1
  -4  -5  11 173.892 25.6820  -2
   4   5   7 173.892 25.6820   1
   5   5   7 168.634 34.3951   1
   6  -6   7 339.415 36.8074  -2
  -6   6   7 339.415 36.8074   1
   5  -6   7 365.649 35.1318  -2
  -5   6   7 365.649 35.1318   1
   4  -6   8 550.017 39.3566  -2
  -4   6   7 550.017 39.3566   1
   3  -6   8 640.276 32.5414  -2
  -3   6   7 640.276 32.5414   1
  -2   6   7 29.1940 10.6227   1
   1  -6   9 1060.34 35.6024  -2
  -1   6   7 1060.34 35.6024   1
   0   6   7 -1.8352 9.59581   1
  -1  -6  10 572.746 23.0791  -2
   1   6   7 572.746 23.0791   1
   2   6   7 31.1299 8.55509   1
  -3  -6  11 46.1895 21.7576  -2
   3   6   7 46.1895 21.7576   1
   4   6   7 26.8821 14.8976   1
   5  -7   8 58.8830 34.5875  -2
  -5   7   7 58.8830 34.5875   1
   4  -7   8 449.164 32.1089  -2
  -4   7   7 449.164 32.1089   1
  -3   7   7 97.6407 15.9563   1
   2  -7   9 213.624 21.9745  -2
  -2   7   7 213.624 21.9745   1
  -1   7   7 7.83593 9.13259   1
   0  -7  10 333.986 29.3146  -2
   0   7   7 333.986 29.3146   1
   1   7   7 239.626 21.9703   1
   3   7   7 121.245 16.2478   1
  -4   8   7 159.042 19.7653   1
   3  -8   9 83.1302 20.8298  -2
  -3   8   7 83.1302 20.8298   1
  -2   8   7 -4.1019 10.4596   1
   1  -8  10 67.0872 16.8205  -2
  -1   8   7 67.0872 16.8205   1
   0   8   7 232.701 22.7712   1
   2   8   7 475.080 42.7577   1
  -1   9   7 -3.8723 19.2943   1
  -3 -10   8 1.78913 16.7526   1
   2  10   3 239.777 37.3006  -2
  -2 -10   8 239.777 37.3006   1
   1  10   3 63.9417 42.6686  -2
  -1 -10   8 63.9417 42.6686   1
   0  10   4 354.894 40.0361  -2
   0 -10   8 354.894 40.0361   1
  -1  10   4 178.292 32.2948  -2
   1 -10   8 178.292 32.2948   1
  -2  10   5 118.400 73.8248  -2
   2 -10   8 118.400 73.8248   1
   4   9   2 526.081 63.0208  -2
  -4  -9   8 526.081 63.0208   1
   3   9   3 99.5023 35.5784  -2
  -3  -9   8 99.5023 35.5784   1
   2   9   3 564.752 40.7040  -2
  -2  -9   8 564.752 40.7040   1
   1   9   4 670.055 43.9255  -2
  -1  -9   8 670.055 43.9255   1
   0   9   4 317.367 30.2611  -2
   0  -9   8 317.367 30.2611   1
  -1   9   5 82.6332 75.6342  -2
   1  -9   8 82.6332 75.6342   1
  -2   9   5 207.547 26.1640  -2
   2  -9   8 207.547 26.1640   1
   3  -9   8 238.356 21.9696   1
   5   8   2 54.0648 35.2749  -2
  -5  -8   8 54.0648 35.2749   1
   4   8   3 311.525 36.3454  -2
  -4  -8   8 311.525 36.3454   1
   3   8   3 130.534 27.4925  -2
  -3  -8   8 130.534 27.4925   1
   2   8   4 129.633 45.3583  -2
  -2  -8   8 129.633 45.3583   1
   1   8   4 24.3453 24.1273  -2
  -1  -8   8 24.3453 24.1273   1
   0  -8   8 371.599 22.6299   1
  -1   8   5 104.347 21.4847  -2
   1  -8   8 104.347 21.4847   1
   2  -8   8 516.317 24.5394   1
  -3   8   6 528.723 26.2752  -2
   3  -8   8 528.723 26.2752   1
   4  -8   8 51.2849 14.5142   1
   6   7   2 371.104 66.6471  -2
  -6  -7   8 371.104 66.6471   1
   5   7   3 -9.0737 34.1764  -2
  -5  -7   8 -9.0737 34.1764   1
   4   7   3 90.1650 30.8709  -2
  -4  -7   8 90.1650 30.8709   1
   3   7   4 52.2370 64.1531  -2
  -3  -7   8 52.2370 64.1531   1
   2   7   4 739.389 31.0565  -2
  -2  -7   8 739.389 31.0565   1
  -1  -7   8 336.473 21.5586   1
   0   7   5 267.847 21.1884  -2
   0  -7   8 267.847 21.1884   1
   1  -7   8 433.443 20.5773   1
  -2   7   6 419.935 24.3346  -2
   2  -7   8 419.935 24.3346   1
   3  -7   8 139.057 18.2556   1
  -4   7   7 642.754 29.8921  -2
   4  -7   8 642.754 29.8921   1
  -5   7   7 74.2233 60.3747  -2
   5  -7   8 74.2233 60.3747   1
   6   6   3 -39.708 41.7759  -2
  -6  -6   8 -39.708 41.7759   1
   5   6   3 841.302 37.0899  -2
  -5  -6   8 841.302 37.0899   1
   4   6   4 378.820 92.3921  -2
  -4  -6   8 378.820 92.3921   1
   3   6   4 1404.80 43.9693  -2
  -3  -6   8 1404.80 43.9693   1
  -2  -6   8 112.873 14.1530   1
   1   6   5 1192.05 32.2781  -2
  -1  -6   8 1192.05 32.2781   1
   0  -6   8 249.845 14.8097   1
  -1   6   6 202.760 18.2032  -2
   1  -6   8 202.760 18.2032   1
   2  -6   8 864.641 27.7398   1
  -3   6   7 527.740 29.7250  -2
   3  -6   8 527.740 29.7250   1
  -4   6   7 765.951 45.3077  -2
   4  -6   8 765.951 45.3077   1
  -5   6   8 117.290 30.6261  -2
   5  -6   8 117.290 30.6261   1
  -7  -5   8 221.552 42.0098   1
   6   5   3 395.577 30.8001  -2
  -6  -5   8 395.577 30.8001   1
  -5  -5   8 766.694 30.1531   1
   4   5   4 351.332 24.3241  -2
  -4  -5   8 351.332 24.3241   1
  -3  -5   8 306.626 23.7203   1
   2   5   5 60.8404 14.6668  -2
  -2  -5   8 60.8404 14.6668   1
  -1  -5   8 214.571 12.8141   1
   0   5   6 978.406 26.0199  -2
   0  -5   8 978.406 26.0199   1
   1  -5   8 650.380 19.7904   1
  -2   5   7 10.8331 17.4909  -2
   2  -5   8 10.8331 17.4909   1
  -3   5   7 293.900 24.4989  -2
   3  -5   8 293.900 24.4989   1
  -4   5   8 11.7913 31.6904  -2
   4  -5   8 11.7913 31.6904   1
  -5   5   8 23.5072 31.2564  -2
   5  -5   8 23.5072 31.2564   1
   6  -5   8 77.5625 17.5992   1
   7   4   3 -21.639 27.5482  -2
  -7  -4   8 -21.639 27.5482   1
  -6  -4   8 298.137 22.1471   1
   5   4   4 619.985 26.1017  -2
  -5  -4   8 619.985 26.1017   1
   4   4   4 51.1393 94.7608  -2
  -4  -4   8 51.1393 94.7608   1
   3   4   5 236.285 17.8287  -2
  -3  -4   8 236.285 17.8287   1
   2   4   5 781.932 88.4687  -2
  -2  -4   8 781.932 88.4687   1
   1   4   6 339.157 17.9516  -2
  -1  -4   8 339.157 17.9516   1
   0   4   6 887.342 77.4699  -2
   0  -4   8 887.342 77.4699   1
  -1   4   7 619.682 24.8042  -2
   1  -4   8 619.682 24.8042   1
  -2   4   7 87.8923 17.1456  -2
   2  -4   8 87.8923 17.1456   1
  -3   4   8 297.439 65.2692  -2
   3  -4   8 297.439 65.2692   1
  -4   4   8 493.135 26.4212  -2
   4  -4   8 493.135 26.4212   1
   5  -4   8 866.027 29.7555   1
  -6   4   9 99.5267 24.2969  -2
   6  -4   8 99.5267 24.2969   1
  -7  -3   8 20.3901 15.4338   1
   6   3   4 292.126 23.5814  -2
  -6  -3   8 292.126 23.5814   1
  -5  -3   8 -13.821 10.8232   1
   4   3   5 1653.86 39.0315  -2
  -4  -3   8 1653.86 39.0315   1
   3   3   5 -70.453 84.7813  -2
  -3  -3   8 -70.453 84.7813   1
   2   3   6 1314.20 28.9780  -2
  -2  -3   8 1314.20 28.9780   1
   1   3   6 983.691 24.5405  -2
  -1  -3   8 983.691 24.5405   1
   0   3   7 1561.12 46.0680  -2
   0  -3   8 1561.12 46.0680   1
  -1   3   7 1487.06 34.2652  -2
   1  -3   8 1487.06 34.2652   1
   2  -3   8 51.9455 9.22431   1
  -3   3   8 1265.27 30.2204  -2
   3  -3   8 1265.27 30.2204   1
   4  -3   8 24.6046 9.45482   1
  -5   3   9 383.908 21.5184  -2
   5  -3   8 383.908 21.5184   1
   6  -3   8 22.5115 15.4658   1
  -8  -2   8 207.543 39.1837   1
   7   2   4 344.845 27.8368  -2
  -7  -2   8 344.845 27.8368   1
  -6  -2   8 932.841 30.5763   1
   5   2   5 174.608 23.0988  -2
  -5  -2   8 174.608 23.0988   1
   4   2   5 661.428 43.5070  -2
  -4  -2   8 661.428 43.5070   1
   3   2   6 34.3091 17.3598  -2
  -3  -2   8 34.3091 17.3598   1
   2   2   6 695.549 22.8174  -2
  -2  -2   8 695.549 22.8174   1
  -1  -2   8 455.910 14.1166   1
   0   2   7 1654.26 34.6491  -2
   0  -2   8 1654.26 34.6491   1
   1  -2   8 215.721 11.0827   1
  -2   2   8 779.728 23.2128  -2
   2  -2   8 779.728 23.2128   1
   3  -2   8 12.6512 8.77802   1
  -4   2   9 708.251 22.7390  -2
   4  -2   8 708.251 22.7390   1
   5  -2   8 97.9195 14.3463   1
  -6   2  10 325.613 31.3945  -2
   6  -2   8 325.613 31.3945   1
  -7  -1   8 120.917 16.6112   1
   6   1   5 83.6577 26.2472  -2
  -6  -1   8 83.6577 26.2472   1
   5   1   5 117.832 25.1717  -2
  -5  -1   8 117.832 25.1717   1
   4   1   6 1029.21 38.9076  -2
  -4  -1   8 1029.21 38.9076   1
   3   1   6 346.629 20.9937  -2
  -3  -1   8 346.629 20.9937   1
  -2  -1   8 1206.34 27.5801   1
   1   1   7 469.922 17.7645  -2
  -1  -1   8 469.922 17.7645   1
   0  -1   8 828.910 19.4701   1
  -1   1   8 353.897 13.8930  -2
   1  -1   8 353.897 13.8930   1
   2  -1   8 108.428 9.97442   1
  -3   1   9 91.4861 16.4315  -2
   3  -1   8 91.4861 16.4315   1
   4  -1   8 644.547 24.1073   1
  -5   1  10 250.225 29.9521  -2
   5  -1   8 250.225 29.9521   1
   6  -1   8 413.985 26.7631   1
   7   0   5 367.638 31.8249  -2
  -7   0   8 367.638 31.8249   1
   6   0   5 4.79472 24.1175  -2
  -6   0   8 4.79472 24.1175   1
   5   0   6 503.125 53.1861  -2
  -5   0   8 503.125 53.1861   1
   4   0   6 345.987 21.1786  -2
  -4   0   8 345.987 21.1786   1
  -3   0   8 1730.99 36.4749   1
   2   0   7 105.469 13.0124  -2
  -2   0   8 105.469 13.0124   1
  -1   0   8 1010.69 22.5723   1
   0   0   8 960.552 22.9219  -2
   0   0   8 960.552 22.9219   1
   1   0   8 127.617 10.3504   1
  -2   0   9 1225.96 35.7631  -2
   2   0   8 1225.96 35.7631   1
   3   0   8 7.55169 10.7990   1
  -4   0  10 939.036 37.2367  -2
   4   0   8 939.036 37.2367   1
   5   0   8 8.67243 13.6266   1
  -6   0  11 386.366 46.8177  -2
   6   0   8 386.366 46.8177   1
   7  -1   5 535.152 37.1556  -2
  -7   1   8 535.152 37.1556   1
   6  -1   6 226.117 78.4775  -2
  -6   1   8 226.117 78.4775   1
   5  -1   6 1106.73 32.9203  -2
  -5   1   8 1106.73 32.9203   1
  -4   1   8 54.3642 10.0169   1
   3  -1   7 1648.37 42.3545  -2
  -3   1   8 1648.37 42.3545   1
  -2   1   8 207.596 12.0161   1
   1  -1   8 255.593 17.0516  -2
  -1   1   8 255.593 17.0516   1
   0   1   8 54.7785 9.40750   1
  -1  -1   9 430.472 21.9616  -2
   1   1   8 430.472 21.9616   1
   2   1   8 14.8339 11.1745   1
  -3  -1  10 215.152 23.3654  -2
   3   1   8 215.152 23.3654   1
  -4  -1  10 375.600 32.5812  -2
   4   1   8 375.600 32.5812   1
  -5  -1  11 6.95949 33.0299  -2
   5   1   8 6.95949 33.0299   1
  -6  -1  11 130.881 52.8873  -2
   6   1   8 130.881 52.8873   1
  -7   2   8 26.2550 20.7553   1
   6  -2   6 213.538 25.4469  -2
  -6   2   8 213.538 25.4469   1
  -5   2   8 34.3934 11.5853   1
   4  -2   7 292.781 20.5477  -2
  -4   2   8 292.781 20.5477   1
  -3   2   8 304.014 19.1289   1
   2  -2   8 595.543 28.4368  -2
  -2   2   8 595.543 28.4368   1
  -1   2   8 507.424 19.0465   1
   0  -2   9 255.798 18.1182  -2
   0   2   8 255.798 18.1182   1
   1   2   8 21.8545 9.18587   1
  -2  -2  10 48.8527 22.0743  -2
   2   2   8 48.8527 22.0743   1
  -3  -2  10 155.652 25.1385  -2
   3   2   8 155.652 25.1385   1
  -4  -2  11 20.2890 76.9608  -2
   4   2   8 20.2890 76.9608   1
  -5  -2  11 296.341 32.8560  -2
   5   2   8 296.341 32.8560   1
   7  -3   6 185.300 35.6197  -2
  -7   3   8 185.300 35.6197   1
  -6   3   8 32.4599 17.6780   1
   5  -3   7 75.0083 21.5053  -2
  -5   3   8 75.0083 21.5053   1
  -4   3   8 417.311 22.8610   1
   3  -3   8 886.424 35.7167  -2
  -3   3   8 886.424 35.7167   1
  -2   3   8 783.439 27.1145   1
   1  -3   9 931.853 31.5467  -2
  -1   3   8 931.853 31.5467   1
   0  -3   9 721.434 28.9430  -2
   0   3   8 721.434 28.9430   1
  -1  -3  10 1075.21 35.3724  -2
   1   3   8 1075.21 35.3724   1
  -2  -3  10 420.413 24.6254  -2
   2   3   8 420.413 24.6254   1
  -3  -3  11 1356.30 111.579  -2
   3   3   8 1356.30 111.579   1
  -4  -3  11 55.6066 24.4321  -2
   4   3   8 55.6066 24.4321   1
   5   3   8 168.613 21.5037   1
  -7   4   8 16.6373 23.9520   1
   6  -4   7 938.616 42.7291  -2
  -6   4   8 938.616 42.7291   1
  -5   4   8 9.78222 15.5476   1
   4  -4   8 668.651 34.9379  -2
  -4   4   8 668.651 34.9379   1
  -3   4   8 82.8167 13.6649   1
   2  -4   9 483.492 30.4851  -2
  -2   4   8 483.492 30.4851   1
   1  -4   9 517.332 25.7251  -2
  -1   4   8 517.332 25.7251   1
   0  -4  10 208.534 34.9619  -2
   0   4   8 208.534 34.9619   1
  -1  -4  10 796.352 29.5305  -2
   1   4   8 796.352 29.5305   1
   2   4   8 289.164 20.1944   1
  -3  -4  11 532.372 27.0964  -2
   3   4   8 532.372 27.0964   1
   4   4   8 79.7652 16.1909   1
   6  -5   7 311.846 64.7627  -2
  -6   5   8 311.846 64.7627   1
   5  -5   8 -20.260 29.1970  -2
  -5   5   8 -20.260 29.1970   1
   4  -5   8 84.5086 29.1061  -2
  -4   5   8 84.5086 29.1061   1
   3  -5   9 127.809 28.4463  -2
  -3   5   8 127.809 28.4463   1
   2  -5   9 979.877 38.7380  -2
  -2   5   8 979.877 38.7380   1
  -1   5   8 21.5397 10.7604   1
   0  -5  10 521.568 27.8027  -2
   0   5   8 521.568 27.8027   1
   1   5   8 -18.847 8.16764   1
  -2  -5  11 333.421 19.8749  -2
   2   5   8 333.421 19.8749   1
   3   5   8 3.36379 11.8433   1
  -4  -5  12 269.855 36.1262  -2
   4   5   8 269.855 36.1262   1
   5  -6   8 62.0571 33.1880  -2
  -5   6   8 62.0571 33.1880   1
   4  -6   9 315.892 36.8806  -2
  -4   6   8 315.892 36.8806   1
   3  -6   9 386.691 30.7214  -2
  -3   6   8 386.691 30.7214   1
  -2   6   8 13.3463 12.7377   1
   1  -6  10 325.767 23.1465  -2
  -1   6   8 325.767 23.1465   1
   0   6   8 170.881 17.2758   1
  -1  -6  11 176.759 20.1771  -2
   1   6   8 176.759 20.1771   1
   2   6   8 637.454 24.0106   1
  -3  -6  12 437.765 29.7441  -2
   3   6   8 437.765 29.7441   1
   4  -7   9 101.172 29.3685  -2
  -4   7   8 101.172 29.3685   1
  -3   7   8 191.675 19.1098   1
   2  -7  10 319.199 27.7603  -2
  -2   7   8 319.199 27.7603   1
  -1   7   8 1.71730 10.1455   1
   0  -7  11 249.801 40.0601  -2
   0   7   8 249.801 40.0601   1
   1   7   8 28.9650 25.7251   1
   3  -8  10 183.041 52.3336  -2
  -3   8   8 183.041 52.3336   1
  -2   8   8 90.2081 14.5212   1
   1  -8  11 238.610 53.7247  -2
  -1   8   8 238.610 53.7247   1
   0   8   8 20.0008 29.4603   1
   1  10   4 184.727 46.8954  -2
  -1 -10   9 184.727 46.8954   1
   0  10   5 251.099 68.0941  -2
   0 -10   9 251.099 68.0941   1
  -1  10   5 306.735 43.5748  -2
   1 -10   9 306.735 43.5748   1
   2 -10   9 212.794 41.5746   1
   3   9   4 400.523 41.7534  -2
  -3  -9   9 400.523 41.7534   1
   2   9   4 -5.2621 36.5630  -2
  -2  -9   9 -5.2621 36.5630   1
   1   9   5 375.920 40.4453  -2
  -1  -9   9 375.920 40.4453   1
   0   9   5 136.044 30.6532  -2
   0  -9   9 136.044 30.6532   1
  -1   9   6 484.717 89.5298  -2
   1  -9   9 484.717 89.5298   1
  -2   9   6 83.2702 26.1018  -2
   2  -9   9 83.2702 26.1018   1
   3  -9   9 205.136 39.4584   1
   4   8   4 164.606 39.1269  -2
  -4  -8   9 164.606 39.1269   1
   3   8   4 632.742 44.6101  -2
  -3  -8   9 632.742 44.6101   1
   2   8   5 137.604 52.9477  -2
  -2  -8   9 137.604 52.9477   1
   1   8   5 900.114 37.6860  -2
  -1  -8   9 900.114 37.6860   1
   0   8   6 6.78694 70.2866  -2
   0  -8   9 6.78694 70.2866   1
  -1   8   6 650.066 33.5889  -2
   1  -8   9 650.066 33.5889   1
   2  -8   9 83.9586 15.9544   1
  -3   8   7 92.7480 21.4176  -2
   3  -8   9 92.7480 21.4176   1
   4  -8   9 53.1679 31.5499   1
   5   7   4 238.488 42.4724  -2
  -5  -7   9 238.488 42.4724   1
   4   7   4 334.614 39.5497  -2
  -4  -7   9 334.614 39.5497   1
   3   7   5 778.917 89.5323  -2
  -3  -7   9 778.917 89.5323   1
   2   7   5 309.474 32.2941  -2
  -2  -7   9 309.474 32.2941   1
  -1  -7   9 40.5431 14.9826   1
   0   7   6 74.7472 18.1618  -2
   0  -7   9 74.7472 18.1618   1
   1  -7   9 423.157 21.8527   1
  -2   7   7 143.680 21.6958  -2
   2  -7   9 143.680 21.6958   1
   3  -7   9 362.178 23.6868   1
  -4   7   8 120.402 33.6771  -2
   4  -7   9 120.402 33.6771   1
  -6  -6   9 249.940 35.8117   1
   5   6   4 277.292 30.9323  -2
  -5  -6   9 277.292 30.9323   1
   4   6   5 -70.966 65.7112  -2
  -4  -6   9 -70.966 65.7112   1
   3   6   5 118.988 26.2775  -2
  -3  -6   9 118.988 26.2775   1
  -2  -6   9 95.1453 18.0856   1
   1   6   6 203.098 17.4755  -2
  -1  -6   9 203.098 17.4755   1
   0  -6   9 361.753 18.2085   1
  -1   6   7 758.426 27.0666  -2
   1  -6   9 758.426 27.0666   1
   2  -6   9 966.084 33.1797   1
  -3   6   8 357.788 31.8451  -2
   3  -6   9 357.788 31.8451   1
  -4   6   8 461.220 43.5328  -2
   4  -6   9 461.220 43.5328   1
   6   5   4 187.050 31.3334  -2
  -6  -5   9 187.050 31.3334   1
  -5  -5   9 193.653 22.2450   1
   4   5   5 570.913 29.8817  -2
  -4  -5   9 570.913 29.8817   1
  -3  -5   9 151.005 20.5701   1
   2   5   6 1606.34 44.3033  -2
  -2  -5   9 1606.34 44.3033   1
  -1  -5   9 14.2393 9.64340   1
   0   5   7 880.332 26.2134  -2
   0  -5   9 880.332 26.2134   1
   1  -5   9 80.3050 11.1667   1
  -2   5   8 741.123 27.6053  -2
   2  -5   9 741.123 27.6053   1
  -3   5   8 118.749 35.6956  -2
   3  -5   9 118.749 35.6956   1
  -4   5   9 27.1544 36.0760  -2
   4  -5   9 27.1544 36.0760   1
  -5   5   9 374.846 38.7005  -2
   5  -5   9 374.846 38.7005   1
  -6  -4   9 112.068 18.4519   1
   5   4   5 31.0082 21.2926  -2
  -5  -4   9 31.0082 21.2926   1
   4   4   5 726.570 105.824  -2
  -4  -4   9 726.570 105.824   1
   3   4   6 253.022 19.6623  -2
  -3  -4   9 253.022 19.6623   1
  -2  -4   9 86.4289 11.0080   1
   1   4   7 98.8991 16.5305  -2
  -1  -4   9 98.8991 16.5305   1
   0   4   7 90.0614 34.7277  -2
   0  -4   9 90.0614 34.7277   1
  -1   4   8 387.764 24.3179  -2
   1  -4   9 387.764 24.3179   1
  -2   4   8 599.552 27.3924  -2
   2  -4   9 599.552 27.3924   1
  -3   4   9 545.715 75.2167  -2
   3  -4   9 545.715 75.2167   1
  -4   4   9 296.779 26.3143  -2
   4  -4   9 296.779 26.3143   1
   5  -4   9 6.21232 13.0084   1
  -7  -3   9 182.471 21.3380   1
   6   3   5 590.188 32.4013  -2
  -6  -3   9 590.188 32.4013   1
  -5  -3   9 439.118 24.1398   1
   4   3   6 -4.0486 19.3615  -2
  -4  -3   9 -4.0486 19.3615   1
   3   3   6 432.147 94.8760  -2
  -3  -3   9 432.147 94.8760   1
   2   3   7 46.9661 17.0412  -2
  -2  -3   9 46.9661 17.0412   1
   1   3   7 565.081 24.3633  -2
  -1  -3   9 565.081 24.3633   1
   0   3   8 537.988 37.6766  -2
   0  -3   9 537.988 37.6766   1
  -1   3   8 1184.03 34.2330  -2
   1  -3   9 1184.03 34.2330   1
  -2   3   9 219.587 57.3914  -2
   2  -3   9 219.587 57.3914   1
  -3   3   9 237.262 21.2072  -2
   3  -3   9 237.262 21.2072   1
   4  -3   9 186.633 14.5646   1
  -5   3  10 112.033 22.6005  -2
   5  -3   9 112.033 22.6005   1
   6  -3   9 478.436 43.5225   1
   7   2   5 102.559 24.7349  -2
  -7  -2   9 102.559 24.7349   1
  -6  -2   9 334.083 20.8056   1
   5   2   6 638.660 30.7200  -2
  -5  -2   9 638.660 30.7200   1
   4   2   6 441.263 43.1158  -2
  -4  -2   9 441.263 43.1158   1
   3   2   7 1617.88 40.6496  -2
  -3  -2   9 1617.88 40.6496   1
   2   2   7 1029.77 28.7193  -2
  -2  -2   9 1029.77 28.7193   1
   1   2   8 1790.49 93.3089  -2
  -1  -2   9 1790.49 93.3089   1
   0   2   8 264.436 19.0863  -2
   0  -2   9 264.436 19.0863   1
   1  -2   9 343.686 15.1711   1
  -2   2   9 734.607 25.6107  -2
   2  -2   9 734.607 25.6107   1
   3  -2   9 17.2359 11.5789   1
  -4   2  10 501.779 26.1180  -2
   4  -2   9 501.779 26.1180   1
   5  -2   9 143.938 17.8549   1
   7   1   5 -42.659 123.376  -2
  -7  -1   9 -42.659 123.376   1
   6   1   6 556.508 33.5858  -2
  -6  -1   9 556.508 33.5858   1
   5   1   6 620.659 31.6560  -2
  -5  -1   9 620.659 31.6560   1
   4   1   7 329.720 27.6901  -2
  -4  -1   9 329.720 27.6901   1
   3   1   7 419.755 23.1429  -2
  -3  -1   9 419.755 23.1429   1
  -2  -1   9 240.299 13.2329   1
   1   1   8 306.969 15.8913  -2
  -1  -1   9 306.969 15.8913   1
   0  -1   9 8.53840 7.20598   1
  -1   1   9 572.033 23.5082  -2
   1  -1   9 572.033 23.5082   1
   2  -1   9 306.685 23.0259   1
  -3   1  10 724.648 31.3361  -2
   3  -1   9 724.648 31.3361   1
   4  -1   9 20.6407 13.4000   1
  -5   1  11 2.67300 27.6509  -2
   5  -1   9 2.67300 27.6509   1
   7   0   6 21.0023 29.5328  -2
  -7   0   9 21.0023 29.5328   1
   6   0   6 391.880 30.1294  -2
  -6   0   9 391.880 30.1294   1
   5   0   7 444.581 33.6060  -2
  -5   0   9 444.581 33.6060   1
   4   0   7 139.653 21.9096  -2
  -4   0   9 139.653 21.9096   1
  -3   0   9 10.9050 10.2847   1
   2   0   8 932.919 27.5056  -2
  -2   0   9 932.919 27.5056   1
  -1   0   9 290.428 16.7952   1
   0   0   9 584.550 23.4834  -2
   0   0   9 584.550 23.4834   1
   1   0   9 26.3923 11.4729   1
  -2   0  10 513.332 29.8032  -2
   2   0   9 513.332 29.8032   1
   3   0   9 129.839 14.6808   1
  -4   0  11 579.661 33.5767  -2
   4   0   9 579.661 33.5767   1
  -5   0  11 450.672 81.1373  -2
   5   0   9 450.672 81.1373   1
   7  -1   6 135.758 42.2043  -2
  -7   1   9 135.758 42.2043   1
   6  -1   7 65.1469 77.8571  -2
  -6   1   9 65.1469 77.8571   1
   5  -1   7 493.746 29.5846  -2
  -5   1   9 493.746 29.5846   1
  -4   1   9 474.056 22.3250   1
   3  -1   8 103.708 20.4852  -2
  -3   1   9 103.708 20.4852   1
  -2   1   9 1793.94 52.0238   1
   1  -1   9 564.111 23.5496  -2
  -1   1   9 564.111 23.5496   1
   0   1   9 1003.35 30.5014   1
  -1  -1  10 127.542 21.7294  -2
   1   1   9 127.542 21.7294   1
   2   1   9 64.7134 15.2549   1
  -3  -1  11 223.995 28.2132  -2
   3   1   9 223.995 28.2132   1
  -4  -1  11 130.059 31.6778  -2
   4   1   9 130.059 31.6778   1
  -5  -1  12 177.052 55.9622  -2
   5   1   9 177.052 55.9622   1
  -7   2   9 80.6307 21.7507   1
   6  -2   7 298.948 37.3486  -2
  -6   2   9 298.948 37.3486   1
  -5   2   9 6.41972 13.2146   1
   4  -2   8 709.087 29.4855  -2
  -4   2   9 709.087 29.4855   1
  -3   2   9 23.1092 12.3917   1
   2  -2   9 614.570 30.3486  -2
  -2   2   9 614.570 30.3486   1
  -1   2   9 35.9589 10.6454   1
   0  -2  10 753.972 32.2275  -2
   0   2   9 753.972 32.2275   1
  -1  -2  10 5.97261 51.9882  -2
   1   2   9 5.97261 51.9882   1
  -2  -2  11 732.793 37.4407  -2
   2   2   9 732.793 37.4407   1
  -3  -2  11 138.939 27.1521  -2
   3   2   9 138.939 27.1521   1
  -4  -2  12 441.648 94.1603  -2
   4   2   9 441.648 94.1603   1
  -5  -2  12 -64.468 44.2382  -2
   5   2   9 -64.468 44.2382   1
  -6   3   9 72.9790 19.9361   1
   5  -3   8 420.757 29.4477  -2
  -5   3   9 420.757 29.4477   1
  -4   3   9 6.09189 12.6252   1
   3  -3   9 193.525 26.7739  -2
  -3   3   9 193.525 26.7739   1
  -2   3   9 392.333 21.9706   1
   1  -3  10 262.932 23.7210  -2
  -1   3   9 262.932 23.7210   1
   0  -3  10 254.851 27.3193  -2
   0   3   9 254.851 27.3193   1
  -1  -3  11 478.771 33.2124  -2
   1   3   9 478.771 33.2124   1
  -2  -3  11 67.6560 24.1888  -2
   2   3   9 67.6560 24.1888   1
  -3  -3  12 255.265 57.9883  -2
   3   3   9 255.265 57.9883   1
  -4  -3  12 352.684 30.5514  -2
   4   3   9 352.684 30.5514   1
   6  -4   8 41.2618 33.8478  -2
  -6   4   9 41.2618 33.8478   1
  -5   4   9 135.262 20.1092   1
   4  -4   9 186.584 33.0727  -2
  -4   4   9 186.584 33.0727   1
   3  -4   9 700.345 63.9981  -2
  -3   4   9 700.345 63.9981   1
   2  -4  10 40.1940 26.9485  -2
  -2   4   9 40.1940 26.9485   1
   1  -4  10 1222.31 43.9556  -2
  -1   4   9 1222.31 43.9556   1
   0  -4  11 397.739 37.1714  -2
   0   4   9 397.739 37.1714   1
  -1  -4  11 776.490 34.0601  -2
   1   4   9 776.490 34.0601   1
   2   4   9 723.914 40.6707   1
  -3  -4  12 25.8246 23.0565  -2
   3   4   9 25.8246 23.0565   1
   4   4   9 247.003 32.1439   1
   5  -5   9 354.137 35.1528  -2
  -5   5   9 354.137 35.1528   1
   4  -5   9 35.1316 30.8231  -2
  -4   5   9 35.1316 30.8231   1
   3  -5  10 808.097 47.8017  -2
  -3   5   9 808.097 47.8017   1
   2  -5  10 57.6446 25.9041  -2
  -2   5   9 57.6446 25.9041   1
   1  -5  11 151.599 36.7161  -2
  -1   5   9 151.599 36.7161   1
   0  -5  11 266.008 24.4405  -2
   0   5   9 266.008 24.4405   1
   1   5   9 177.003 21.3461   1
  -2  -5  12 131.154 18.1337  -2
   2   5   9 131.154 18.1337   1
   3   5   9 151.576 18.4764   1
   4  -6  10 123.832 44.1600  -2
  -4   6   9 123.832 44.1600   1
   3  -6  10 110.260 33.1825  -2
  -3   6   9 110.260 33.1825   1
  -2   6   9 26.4229 15.8014   1
   1  -6  11 222.050 29.4183  -2
  -1   6   9 222.050 29.4183   1
   0   6   9 17.6987 17.9228   1
  -1  -6  12 626.470 38.1775  -2
   1   6   9 626.470 38.1775   1
   2   6   9 10.1418 20.7750   1
  -3   7   9 11.8618 16.1471   1
   2  -7  11 576.738 34.2731  -2
  -2   7   9 576.738 34.2731   1
  -1   7   9 -0.3148 22.1409   1
   0  -7  12 288.950 43.5813  -2
   0   7   9 288.950 43.5813   1
   1   7   9 81.3538 45.8370   1
   2   9   5 394.414 65.9424  -2
  -2  -9  10 394.414 65.9424   1
   1   9   6 215.518 48.8872  -2
  -1  -9  10 215.518 48.8872   1
   0   9   6 102.512 30.9477  -2
   0  -9  10 102.512 30.9477   1
   1  -9  10 48.2485 19.1070   1
   3   8   5 101.882 39.9004  -2
  -3  -8  10 101.882 39.9004   1
   2   8   6 262.866 41.0899  -2
  -2  -8  10 262.866 41.0899   1
   1   8   6 295.449 31.8213  -2
  -1  -8  10 295.449 31.8213   1
   0   8   7 554.499 87.1282  -2
   0  -8  10 554.499 87.1282   1
  -1   8   7 82.0827 26.7120  -2
   1  -8  10 82.0827 26.7120   1
   2  -8  10 973.622 42.5581   1
  -5  -7  10 199.467 64.2904   1
   4   7   5 154.374 38.6522  -2
  -4  -7  10 154.374 38.6522   1
   3   7   6 252.270 73.1957  -2
  -3  -7  10 252.270 73.1957   1
   2   7   6 579.981 34.5122  -2
  -2  -7  10 579.981 34.5122   1
  -1  -7  10 -12.000 13.5385   1
   0   7   7 478.850 25.5068  -2
   0  -7  10 478.850 25.5068   1
   1  -7  10 3.53209 15.2841   1
  -2   7   8 230.053 26.5643  -2
   2  -7  10 230.053 26.5643   1
   3  -7  10 -0.2190 15.4782   1
  -6  -6  10 -17.024 66.7295   1
   5   6   5 423.079 36.3708  -2
  -5  -6  10 423.079 36.3708   1
   4   6   6 229.794 72.6202  -2
  -4  -6  10 229.794 72.6202   1
   3   6   6 398.511 29.8314  -2
  -3  -6  10 398.511 29.8314   1
  -2  -6  10 17.1407 14.6800   1
   1   6   7 558.017 25.8396  -2
  -1  -6  10 558.017 25.8396   1
   0  -6  10 23.1399 11.8494   1
  -1   6   8 203.510 21.4452  -2
   1  -6  10 203.510 21.4452   1
   2  -6  10 65.7537 16.1141   1
  -3   6   9 163.733 35.5619  -2
   3  -6  10 163.733 35.5619   1
  -4   6   9 150.178 42.3906  -2
   4  -6  10 150.178 42.3906   1
   6   5   5 96.0652 79.9188  -2
  -6  -5  10 96.0652 79.9188   1
  -5  -5  10 122.783 23.0104   1
   4   5   6 346.897 30.8230  -2
  -4  -5  10 346.897 30.8230   1
  -3  -5  10 3.59418 14.9285   1
   2   5   7 337.285 24.3933  -2
  -2  -5  10 337.285 24.3933   1
  -1  -5  10 113.493 14.9671   1
   0   5   8 444.936 23.2861  -2
   0  -5  10 444.936 23.2861   1
   1  -5  10 727.646 23.6023   1
  -2   5   9 13.4497 27.5146  -2
   2  -5  10 13.4497 27.5146   1
  -3   5   9 938.992 48.1580  -2
   3  -5  10 938.992 48.1580   1
  -4   5  10 244.308 44.8220  -2
   4  -5  10 244.308 44.8220   1
  -6  -4  10 893.325 41.1649   1
   5   4   6 516.426 30.9977  -2
  -5  -4  10 516.426 30.9977   1
  -4  -4  10 532.328 32.6137   1
   3   4   7 520.458 24.8648  -2
  -3  -4  10 520.458 24.8648   1
  -2  -4  10 14.9667 11.0771   1
   1   4   8 938.310 29.6988  -2
  -1  -4  10 938.310 29.6988   1
   0   4   8 128.166 32.6668  -2
   0  -4  10 128.166 32.6668   1
  -1   4   9 1153.82 37.4647  -2
   1  -4  10 1153.82 37.4647   1
  -2   4   9 47.3256 24.6062  -2
   2  -4  10 47.3256 24.6062   1
  -3   4  10 71.7339 46.8364  -2
   3  -4  10 71.7339 46.8364   1
  -4   4  10 23.5982 33.4349  -2
   4  -4  10 23.5982 33.4349   1
   5  -4  10 159.410 50.6898   1
   6   3   6 20.9838 26.3376  -2
  -6  -3  10 20.9838 26.3376   1
  -5  -3  10 -14.062 16.6295   1
   4   3   7 205.731 25.9803  -2
  -4  -3  10 205.731 25.9803   1
  -3  -3  10 66.7868 12.7429   1
   2   3   8 609.558 24.5364  -2
  -2  -3  10 609.558 24.5364   1
   1   3   8 852.515 30.8259  -2
  -1  -3  10 852.515 30.8259   1
   0   3   9 284.510 25.3291  -2
   0  -3  10 284.510 25.3291   1
  -1   3   9 249.271 23.4567  -2
   1  -3  10 249.271 23.4567   1
   2  -3  10 18.9283 10.4437   1
  -3   3  10 485.553 28.4949  -2
   3  -3  10 485.553 28.4949   1
   4  -3  10 77.6833 15.4094   1
  -5   3  11 345.381 46.0669  -2
   5  -3  10 345.381 46.0669   1
   6   2   6 124.378 75.4512  -2
  -6  -2  10 124.378 75.4512   1
   5   2   7 111.986 26.2438  -2
  -5  -2  10 111.986 26.2438   1
   4   2   7 533.945 38.0043  -2
  -4  -2  10 533.945 38.0043   1
   3   2   8 175.165 24.9930  -2
  -3  -2  10 175.165 24.9930   1
   2   2   8 41.4526 18.3041  -2
  -2  -2  10 41.4526 18.3041   1
   1   2   9 56.4869 36.7456  -2
  -1  -2  10 56.4869 36.7456   1
   0   2   9 1040.06 30.8109  -2
   0  -2  10 1040.06 30.8109   1
   1  -2  10 0.18260 11.6615   1
  -2   2  10 1296.28 46.6476  -2
   2  -2  10 1296.28 46.6476   1
   3  -2  10 26.4265 15.1080   1
  -4   2  11 396.021 29.3185  -2
   4  -2  10 396.021 29.3185   1
   5  -2  10 67.6916 28.2936   1
   7   1   6 347.122 54.0162  -2
  -7  -1  10 347.122 54.0162   1
   6   1   7 32.6396 28.5480  -2
  -6  -1  10 32.6396 28.5480   1
   5   1   7 420.538 30.5478  -2
  -5  -1  10 420.538 30.5478   1
   4   1   8 510.017 30.1543  -2
  -4  -1  10 510.017 30.1543   1
   3   1   8 235.945 23.3134  -2
  -3  -1  10 235.945 23.3134   1
  -2  -1  10 1233.53 32.5255   1
   1   1   9 174.185 17.1164  -2
  -1  -1  10 174.185 17.1164   1
   0  -1  10 648.438 25.9349   1
  -1   1  10 96.6316 21.5944  -2
   1  -1  10 96.6316 21.5944   1
   2  -1  10 104.421 18.3946   1
  -3   1  11 33.7527 22.8087  -2
   3  -1  10 33.7527 22.8087   1
   4  -1  10 51.2581 16.8386   1
   6   0   7 72.1344 32.4108  -2
  -6   0  10 72.1344 32.4108   1
   5   0   8 32.4595 33.6916  -2
  -5   0  10 32.4595 33.6916   1
   4   0   8 703.704 32.7937  -2
  -4   0  10 703.704 32.7937   1
  -3   0  10 356.078 25.7843   1
   2   0   9 495.449 29.2005  -2
  -2   0  10 495.449 29.2005   1
  -1   0  10 609.721 22.6607   1
   0   0  10 105.076 16.2567  -2
   0   0  10 105.076 16.2567   1
   1   0  10 34.4961 13.7305   1
  -2   0  11 448.666 30.2240  -2
   2   0  10 448.666 30.2240   1
   3   0  10 36.1529 15.4896   1
  -4   0  12 8.97803 31.4886  -2
   4   0  10 8.97803 31.4886   1
   6  -1   8 376.874 75.4563  -2
  -6   1  10 376.874 75.4563   1
   5  -1   8 277.873 32.6654  -2
  -5   1  10 277.873 32.6654   1
  -4   1  10 45.6898 17.1402   1
   3  -1   9 631.762 33.3021  -2
  -3   1  10 631.762 33.3021   1
  -2   1  10 58.6955 15.0635   1
   1  -1  10 65.6514 17.5670  -2
  -1   1  10 65.6514 17.5670   1
   0   1  10 17.3136 11.2308   1
  -1  -1  11 729.324 34.3699  -2
   1   1  10 729.324 34.3699   1
   2   1  10 -19.924 13.9865   1
  -3  -1  12 819.750 37.6329  -2
   3   1  10 819.750 37.6329   1
  -4  -1  12 70.5745 36.8292  -2
   4   1  10 70.5745 36.8292   1
   6  -2   8 483.204 43.3281  -2
  -6   2  10 483.204 43.3281   1
  -5   2  10 25.0640 15.0131   1
   4  -2   9 458.062 25.1856  -2
  -4   2  10 458.062 25.1856   1
  -3   2  10 387.832 26.4022   1
   2  -2  10 959.745 37.7291  -2
  -2   2  10 959.745 37.7291   1
  -1   2  10 876.277 29.8944   1
   0  -2  11 33.0471 23.5898  -2
   0   2  10 33.0471 23.5898   1
  -1  -2  11 705.896 54.1156  -2
   1   2  10 705.896 54.1156   1
  -2  -2  12 154.723 31.3770  -2
   2   2  10 154.723 31.3770   1
  -3  -2  12 35.2834 32.2236  -2
   3   2  10 35.2834 32.2236   1
   4   2  10 17.5589 24.4484   1
  -6   3  10 24.9071 23.0364   1
   5  -3   9 127.547 24.7951  -2
  -5   3  10 127.547 24.7951   1
  -4   3  10 50.7515 15.2596   1
   3  -3  10 538.518 33.6647  -2
  -3   3  10 538.518 33.6647   1
  -2   3  10 194.848 19.7078   1
   1  -3  11 297.930 34.6046  -2
  -1   3  10 297.930 34.6046   1
   0  -3  11 135.327 28.6893  -2
   0   3  10 135.327 28.6893   1
  -1  -3  12 260.057 31.2283  -2
   1   3  10 260.057 31.2283   1
  -2  -3  12 409.400 29.6527  -2
   2   3  10 409.400 29.6527   1
  -3  -3  13 335.892 89.9026  -2
   3   3  10 335.892 89.9026   1
  -5   4  10 18.2430 17.2683   1
   4  -4  10 21.5350 35.2141  -2
  -4   4  10 21.5350 35.2141   1
   3  -4  10 17.3898 52.2815  -2
  -3   4  10 17.3898 52.2815   1
   2  -4  11 512.018 34.9975  -2
  -2   4  10 512.018 34.9975   1
   1  -4  11 135.461 33.3001  -2
  -1   4  10 135.461 33.3001   1
   0  -4  12 393.583 38.9125  -2
   0   4  10 393.583 38.9125   1
  -1  -4  12 262.856 27.5599  -2
   1   4  10 262.856 27.5599   1
   2   4  10 592.482 33.8314   1
  -3  -4  13 -36.417 53.7496  -2
   3   4  10 -36.417 53.7496   1
   4  -5  10 153.322 41.2915  -2
  -4   5  10 153.322 41.2915   1
   3  -5  11 90.5946 38.0597  -2
  -3   5  10 90.5946 38.0597   1
   2  -5  11 578.097 36.6500  -2
  -2   5  10 578.097 36.6500   1
   1  -5  12 152.744 41.6024  -2
  -1   5  10 152.744 41.6024   1
   0  -5  12 465.342 30.6446  -2
   0   5  10 465.342 30.6446   1
   1   5  10 23.3729 10.8200   1
  -2  -5  13 416.395 27.3109  -2
   2   5  10 416.395 27.3109   1
   3  -6  11 201.407 69.9030  -2
  -3   6  10 201.407 69.9030   1
  -2   6  10 90.5653 28.5477   1
   1  -6  12 301.029 26.1949  -2
  -1   6  10 301.029 26.1949   1
   0   6  10 -2.1801 17.0114   1
   3   8   6 -114.84 68.4447  -2
  -3  -8  11 -114.84 68.4447   1
   2   8   7 509.257 58.1526  -2
  -2  -8  11 509.257 58.1526   1
   1   8   7 115.257 37.2758  -2
  -1  -8  11 115.257 37.2758   1
   0   8   8 -87.615 77.3443  -2
   0  -8  11 -87.615 77.3443   1
  -1   8   8 122.176 35.9907  -2
   1  -8  11 122.176 35.9907   1
   2  -8  11 -0.3426 31.4120   1
   3   7   7 162.669 78.0020  -2
  -3  -7  11 162.669 78.0020   1
   2   7   7 570.844 36.9042  -2
  -2  -7  11 570.844 36.9042   1
  -1  -7  11 110.041 19.4934   1
   0   7   8 286.760 29.6833  -2
   0  -7  11 286.760 29.6833   1
   1  -7  11 496.922 28.1971   1
  -2   7   9 366.423 29.7599  -2
   2  -7  11 366.423 29.7599   1
   3  -7  11 368.778 58.1545   1
   4   6   7 258.344 81.5912  -2
  -4  -6  11 258.344 81.5912   1
   3   6   7 -16.994 29.5867  -2
  -3  -6  11 -16.994 29.5867   1
  -2  -6  11 29.6510 16.1898   1
   1   6   8 193.991 24.5168  -2
  -1  -6  11 193.991 24.5168   1
   0  -6  11 40.6567 14.5992   1
  -1   6   9 180.961 24.6203  -2
   1  -6  11 180.961 24.6203   1
  -2   6   9 328.962 73.4423  -2
   2  -6  11 328.962 73.4423   1
  -3   6  10 93.8498 41.8573  -2
   3  -6  11 93.8498 41.8573   1
  -5  -5  11 47.7379 25.9516   1
   4   5   7 159.313 29.5264  -2
  -4  -5  11 159.313 29.5264   1
  -3  -5  11 2.47484 18.1000   1
   2   5   8 427.214 27.9769  -2
  -2  -5  11 427.214 27.9769   1
  -1  -5  11 46.8791 15.2079   1
   0   5   9 308.049 26.2280  -2
   0  -5  11 308.049 26.2280   1
  -1   5   9 86.6811 68.2248  -2
   1  -5  11 86.6811 68.2248   1
  -2   5  10 445.331 38.5397  -2
   2  -5  11 445.331 38.5397   1
  -3   5  10 32.6535 45.9889  -2
   3  -5  11 32.6535 45.9889   1
   5   4   7 183.773 28.9931  -2
  -5  -4  11 183.773 28.9931   1
  -4  -4  11 55.6897 19.0974   1
   3   4   8 760.922 38.8908  -2
  -3  -4  11 760.922 38.8908   1
  -2  -4  11 1.13735 11.7713   1
   1   4   9 839.867 32.4945  -2
  -1  -4  11 839.867 32.4945   1
   0   4   9 527.039 36.4395  -2
   0  -4  11 527.039 36.4395   1
  -1   4  10 192.927 26.4102  -2
   1  -4  11 192.927 26.4102   1
  -2   4  10 632.397 37.6834  -2
   2  -4  11 632.397 37.6834   1
  -3   4  11 107.635 47.4210  -2
   3  -4  11 107.635 47.4210   1
  -4   4  11 324.694 71.7412  -2
   4  -4  11 324.694 71.7412   1
   6   3   7 272.674 57.9687  -2
  -6  -3  11 272.674 57.9687   1
  -5  -3  11 833.009 42.6268   1
   4   3   8 94.7024 30.2116  -2
  -4  -3  11 94.7024 30.2116   1
   3   3   8 1227.41 95.7943  -2
  -3  -3  11 1227.41 95.7943   1
   2   3   9 129.675 20.1985  -2
  -2  -3  11 129.675 20.1985   1
   1   3   9 375.594 26.5560  -2
  -1  -3  11 375.594 26.5560   1
   0   3  10 103.160 27.9893  -2
   0  -3  11 103.160 27.9893   1
  -1   3  10 363.711 29.5008  -2
   1  -3  11 363.711 29.5008   1
   2  -3  11 104.092 16.8557   1
  -3   3  11 349.558 31.2267  -2
   3  -3  11 349.558 31.2267   1
   4  -3  11 20.0515 19.4133   1
  -6  -2  11 28.7873 20.1777   1
   5   2   8 223.669 28.6623  -2
  -5  -2  11 223.669 28.6623   1
   4   2   8 39.3897 30.1886  -2
  -4  -2  11 39.3897 30.1886   1
   3   2   9 210.040 27.1114  -2
  -3  -2  11 210.040 27.1114   1
   2   2   9 593.774 28.5185  -2
  -2  -2  11 593.774 28.5185   1
   1   2  10 948.251 61.4252  -2
  -1  -2  11 948.251 61.4252   1
   0   2  10 -6.0239 26.3909  -2
   0  -2  11 -6.0239 26.3909   1
   1  -2  11 86.5048 16.9493   1
  -2   2  11 -8.5248 26.6165  -2
   2  -2  11 -8.5248 26.6165   1
   3  -2  11 39.5294 16.5013   1
  -4   2  12 43.3893 31.3503  -2
   4  -2  11 43.3893 31.3503   1
   6   1   8 161.406 37.7142  -2
  -6  -1  11 161.406 37.7142   1
   5   1   8 35.6191 31.6815  -2
  -5  -1  11 35.6191 31.6815   1
   4   1   9 215.953 32.9630  -2
  -4  -1  11 215.953 32.9630   1
   3   1   9 186.254 31.6305  -2
  -3  -1  11 186.254 31.6305   1
   2   1  10 514.035 74.5196  -2
  -2  -1  11 514.035 74.5196   1
   1   1  10 626.590 32.7801  -2
  -1  -1  11 626.590 32.7801   1
   0  -1  11 220.434 18.2184   1
  -1   1  11 617.297 32.5469  -2
   1  -1  11 617.297 32.5469   1
   2  -1  11 31.8165 16.6323   1
  -3   1  12 992.686 38.4231  -2
   3  -1  11 992.686 38.4231   1
   4  -1  11 -4.0587 20.3798   1
   6   0   8 404.092 54.8675  -2
  -6   0  11 404.092 54.8675   1
   5   0   9 314.461 42.4228  -2
  -5   0  11 314.461 42.4228   1
   4   0   9 599.927 39.1505  -2
  -4   0  11 599.927 39.1505   1
  -3   0  11 19.8557 17.0154   1
   2   0  10 441.842 26.8770  -2
  -2   0  11 441.842 26.8770   1
  -1   0  11 396.455 22.0068   1
   0   0  11 7.11500 17.6078  -2
   0   0  11 7.11500 17.6078   1
   1   0  11 488.968 27.7043   1
  -2   0  12 268.857 29.5871  -2
   2   0  11 268.857 29.5871   1
   3   0  11 -4.6447 15.1615   1
  -6   1  11 162.856 41.3682   1
   5  -1   9 74.7192 31.0293  -2
  -5   1  11 74.7192 31.0293   1
  -4   1  11 42.1957 17.1923   1
   3  -1  10 31.4722 24.9261  -2
  -3   1  11 31.4722 24.9261   1
  -2   1  11 502.808 29.0503   1
   1  -1  11 462.586 28.4734  -2
  -1   1  11 462.586 28.4734   1
   0   1  11 317.556 20.7303   1
  -1  -1  12 62.8574 24.6778  -2
   1   1  11 62.8574 24.6778   1
   2   1  11 49.3567 16.8378   1
  -3  -1  13 69.1802 36.8657  -2
   3   1  11 69.1802 36.8657   1
  -5   2  11 82.2753 19.6885   1
   4  -2  10 329.590 28.6939  -2
  -4   2  11 329.590 28.6939   1
  -3   2  11 286.336 25.0975   1
   2  -2  11 41.9829 26.5295  -2
  -2   2  11 41.9829 26.5295   1
  -1   2  11 151.564 19.3523   1
   0  -2  12 208.881 28.7053  -2
   0   2  11 208.881 28.7053   1
  -1  -2  12 92.4997 42.3403  -2
   1   2  11 92.4997 42.3403   1
  -2  -2  13 748.058 37.1715  -2
   2   2  11 748.058 37.1715   1
  -4   3  11 76.3201 17.8312   1
   3  -3  11 331.255 30.6943  -2
  -3   3  11 331.255 30.6943   1
   2  -3  11 302.706 62.4694  -2
  -2   3  11 302.706 62.4694   1
   1  -3  12 87.2433 32.2443  -2
  -1   3  11 87.2433 32.2443   1
   0  -3  12 657.063 43.2959  -2
   0   3  11 657.063 43.2959   1
  -1  -3  13 76.4916 31.4423  -2
   1   3  11 76.4916 31.4423   1
  -2  -3  13 105.690 29.7591  -2
   2   3  11 105.690 29.7591   1
   3  -4  11 100.625 63.8801  -2
  -3   4  11 100.625 63.8801   1
   2  -4  12 298.031 40.3100  -2
  -2   4  11 298.031 40.3100   1
   1  -4  12 231.506 36.1536  -2
  -1   4  11 231.506 36.1536   1
   0  -4  13 52.5626 36.6768  -2
   0   4  11 52.5626 36.6768   1
  -1  -4  13 192.126 27.9858  -2
   1   4  11 192.126 27.9858   1
   2  -5  12 190.833 69.9056  -2
  -2   5  11 190.833 69.9056   1
  -1   5  11 38.2283 19.7436   1
  -3  -7  12 18.2954 41.9630   1
   2   7   8 39.2401 37.3119  -2
  -2  -7  12 39.2401 37.3119   1
  -1  -7  12 60.9535 18.1846   1
   0   7   9 299.838 32.4291  -2
   0  -7  12 299.838 32.4291   1
   1  -7  12 259.913 44.3512   1
   3   6   8 554.990 40.9360  -2
  -3  -6  12 554.990 40.9360   1
  -2  -6  12 26.6988 17.5056   1
   1   6   9 856.203 36.0967  -2
  -1  -6  12 856.203 36.0967   1
   0  -6  12 79.4469 17.3814   1
  -1   6  10 267.143 32.5462  -2
   1  -6  12 267.143 32.5462   1
   2  -6  12 41.1664 22.5291   1
   4   5   8 303.220 37.8759  -2
  -4  -5  12 303.220 37.8759   1
  -3  -5  12 171.376 23.1975   1
   2   5   9 150.162 27.1447  -2
  -2  -5  12 150.162 27.1447   1
  -1  -5  12 27.8688 15.0012   1
   0   5  10 307.418 28.3435  -2
   0  -5  12 307.418 28.3435   1
  -1   5  10 201.449 43.2212  -2
   1  -5  12 201.449 43.2212   1
  -2   5  11 192.549 53.3192  -2
   2  -5  12 192.549 53.3192   1
  -4  -4  12 118.439 22.1562   1
   3   4   9 11.8381 28.0149  -2
  -3  -4  12 11.8381 28.0149   1
  -2  -4  12 7.84032 13.9401   1
   1   4  10 301.204 30.0449  -2
  -1  -4  12 301.204 30.0449   1
   0   4  10 374.502 34.2307  -2
   0  -4  12 374.502 34.2307   1
  -1   4  11 149.133 30.3156  -2
   1  -4  12 149.133 30.3156   1
  -2   4  11 323.719 34.5961  -2
   2  -4  12 323.719 34.5961   1
   3  -4  12 63.9392 27.6176   1
  -5  -3  12 18.3197 27.1665   1
   4   3   9 381.045 43.5794  -2
  -4  -3  12 381.045 43.5794   1
   3   3   9 339.618 79.9878  -2
  -3  -3  12 339.618 79.9878   1
   2   3  10 523.717 39.0891  -2
  -2  -3  12 523.717 39.0891   1
   1   3  10 186.253 30.3613  -2
  -1  -3  12 186.253 30.3613   1
   0   3  11 688.373 41.9728  -2
   0  -3  12 688.373 41.9728   1
  -1   3  11 96.5346 32.1760  -2
   1  -3  12 96.5346 32.1760   1
   2  -3  12 188.136 27.1455   1
  -3   3  12 400.178 39.9718  -2
   3  -3  12 400.178 39.9718   1
   5   2   9 -22.571 61.2675  -2
  -5  -2  12 -22.571 61.2675   1
   4   2   9 584.434 43.2797  -2
  -4  -2  12 584.434 43.2797   1
   3   2  10 37.2898 29.7598  -2
  -3  -2  12 37.2898 29.7598   1
   2   2  10 274.469 34.1569  -2
  -2  -2  12 274.469 34.1569   1
   1   2  11 65.8038 33.5255  -2
  -1  -2  12 65.8038 33.5255   1
   0   2  11 182.333 30.7489  -2
   0  -2  12 182.333 30.7489   1
   1  -2  12 11.1954 15.2193   1
  -2   2  12 297.784 31.2448  -2
   2  -2  12 297.784 31.2448   1
   3  -2  12 27.8315 20.9976   1
   5   1   9 223.449 40.3011  -2
  -5  -1  12 223.449 40.3011   1
   4   1  10 73.6656 37.5347  -2
  -4  -1  12 73.6656 37.5347   1
   3   1  10 688.685 36.0415  -2
  -3  -1  12 688.685 36.0415   1
   2   1  11 388.107 77.2348  -2
  -2  -1  12 388.107 77.2348   1
   1   1  11 83.6798 32.3666  -2
  -1  -1  12 83.6798 32.3666   1
   0  -1  12 162.811 17.7217   1
  -1   1  12 89.6589 26.0340  -2
   1  -1  12 89.6589 26.0340   1
   2  -1  12 44.7056 18.2684   1
  -5   0  12 -16.885 46.7838   1
   4   0  10 49.9374 32.2353  -2
  -4   0  12 49.9374 32.2353   1
  -3   0  12 411.897 28.6436   1
   2   0  11 187.361 28.4392  -2
  -2   0  12 187.361 28.4392   1
  -1   0  12 773.221 40.6040   1
   0   0  12 76.0381 18.7236  -2
   0   0  12 76.0381 18.7236   1
   1   0  12 373.546 25.9032   1
  -2   0  13 270.620 31.0855  -2
   2   0  12 270.620 31.0855   1
  -4   1  12 6.28199 17.1622   1
   3  -1  11 842.466 39.7807  -2
  -3   1  12 842.466 39.7807   1
  -2   1  12 20.9915 16.5053   1
   1  -1  12 102.589 28.1818  -2
  -1   1  12 102.589 28.1818   1
   0   1  12 92.0132 15.5720   1
  -1  -1  13 87.7326 27.4169  -2
   1   1  12 87.7326 27.4169   1
   2   1  12 84.4679 21.1249   1
   4  -2  11 57.1092 36.1551  -2
  -4   2  12 57.1092 36.1551   1
  -3   2  12 -0.4418 15.4773   1
   2  -2  12 215.144 27.9072  -2
  -2   2  12 215.144 27.9072   1
  -1   2  12 167.291 20.1951   1
   0  -2  13 115.880 34.1032  -2
   0   2  12 115.880 34.1032   1
  -1  -2  13 522.277 39.0412  -2
   1   2  12 522.277 39.0412   1
  -4   3  12 116.144 37.3523   1
   3  -3  12 51.9477 55.5549  -2
  -3   3  12 51.9477 55.5549   1
  -2   3  12 313.760 24.4987   1
   1  -3  13 270.666 76.8070  -2
  -1   3  12 270.666 76.8070   1
   0  -3  13 225.436 53.8904  -2
   0   3  12 225.436 53.8904   1
   1   6  10 -8.0479 33.5239  -2
  -1  -6  13 -8.0479 33.5239   1
   0  -6  13 208.534 55.0654   1
  -3  -5  13 124.925 37.5451   1
   2   5  10 511.152 67.2925  -2
  -2  -5  13 511.152 67.2925   1
  -1  -5  13 33.5078 19.3760   1
   0   5  11 583.098 40.7420  -2
   0  -5  13 583.098 40.7420   1
   3   4  10 166.168 60.4617  -2
  -3  -4  13 166.168 60.4617   1
  -2  -4  13 118.402 24.3971   1
   1   4  11 204.607 33.0158  -2
  -1  -4  13 204.607 33.0158   1
   0   4  11 -16.291 40.8656  -2
   0  -4  13 -16.291 40.8656   1
   3   3  10 436.039 60.0320  -2
  -3  -3  13 436.039 60.0320   1
   2   3  11 94.7735 37.9668  -2
  -2  -3  13 94.7735 37.9668   1
   1   3  11 69.1478 40.6654  -2
  -1  -3  13 69.1478 40.6654   1
   0   3  12 163.005 35.7067  -2
   0  -3  13 163.005 35.7067   1
  -1   3  12 164.231 35.1157  -2
   1  -3  13 164.231 35.1157   1
   4   2  10 403.243 56.8831  -2
  -4  -2  13 403.243 56.8831   1
   3   2  11 164.980 51.6882  -2
  -3  -2  13 164.980 51.6882   1
   2   2  11 619.244 47.2578  -2
  -2  -2  13 619.244 47.2578   1
   1   2  12 606.699 50.8716  -2
  -1  -2  13 606.699 50.8716   1
   0   2  12 81.5136 29.5836  -2
   0  -2  13 81.5136 29.5836   1
   1  -2  13 357.402 26.8828   1
   3   1  11 208.384 34.5763  -2
  -3  -1  13 208.384 34.5763   1
   2   1  12 432.313 82.2868  -2
  -2  -1  13 432.313 82.2868   1
   1   1  12 70.0266 34.3733  -2
  -1  -1  13 70.0266 34.3733   1
   0  -1  13 59.7864 17.1535   1
  -1   1  13 68.7780 49.9722  -2
   1  -1  13 68.7780 49.9722   1
  -3   0  13 30.0486 17.4770   1
   2   0  12 210.825 34.4792  -2
  -2   0  13 210.825 34.4792   1
  -1   0  13 14.9945 17.5323   1
   0   0  13 218.608 57.1048  -2
   0   0  13 218.608 57.1048   1
   1   0  13 53.6368 32.3352   1
  -2   1  13 524.774 36.1135   1
   0   0   0    0.00    0.00   0
;
_shelx_hkl_checksum   85131
