# Supplementary material
Source: MDPI journal article supplement (https://www.mdpi.com/2304-6740/7/10/122)
Supplement: s1 [file s1 › ZnH4As2O8.cif]

data_global       

_publ_contact_author_name
  
;       
Matthias Weil       
;       
  
_publ_contact_author_address  
  
;  
Institute for Chemical Technologies and Analytics
Division of Structural Chemistry
TU Wien
Getreidemarkt 9/164-SC
A-1060 Vienna
Austria       
;  
  
_publ_contact_author_phone      '+43 1 58801 17122'
_publ_contact_author_fax        '+43 1 58801 17199'  
_publ_contact_author_email      'matthias.weil@tuwien.ac.at'
_publ_contact_letter
;
Please consider this CIF submission as supporting information
for Inorganic Chemistry.
;
_publ_requested_journal
;
data deposition
;
_publ_requested_category
;
;
_publ_requested_coeditor_name   ?
_journal_date_recd_electronic      ?
_journal_date_to_coeditor       ?
_journal_date_from_coeditor     ?       
_journal_date_accepted     ?
_journal_date_printers_first    ?       
_journal_date_printers_final    ?       
_journal_date_proofs_out        ?       
_journal_date_proofs_in ?       
_journal_coeditor_name  ?       
_journal_coeditor_code     ?
_journal_paper_category      ?
_journal_coeditor_notes   ?       
_journal_techeditor_code      ?
_iucr_compatibility_tag          ?
_journal_techeditor_notes ?       
_journal_coden_ASTM     ?       
_journal_name_full      ?       
_journal_year   ?       
_journal_volume ?       
_journal_issue  ?       
_journal_page_first     ?       
_journal_page_last      ?       
_journal_suppl_publ_number      ?       
_journal_suppl_publ_pages       ?       
  
_publ_section_title             
;   
data deposition
;
loop_       
  
 _publ_author_name       
 _publ_author_address       

'Weil, Matthias'
;  
Institute for Chemical Technologies and Analytics
Division of Structural Chemistry
TU Wien
Getreidemarkt 9/164-SC
A-1060 Vienna
Austria       
; 

_publ_section_abstract
;
;
_publ_section_comment
;
;
_publ_section_exptl_prep
;
;

_publ_section_exptl_refinement
;
;

_publ_section_references
;


;
_publ_section_acknowledgements
;
;

_publ_section_figure_captions
;
; 
data_ZnAs2H4O8
 
_audit_creation_method            'SHELXL-2018/3'
_shelx_SHELXL_version_number      '2018/3'
_chemical_name_systematic         ?
_chemical_name_common             ?
_chemical_melting_point           ?
_chemical_formula_moiety          'As2 O8 Zn' 
_chemical_formula_sum
 'As2 H4 O8 Zn' 
_chemical_formula_weight          347.24

loop_
 _atom_type_symbol
 _atom_type_description
 _atom_type_scat_dispersion_real
 _atom_type_scat_dispersion_imag
 _atom_type_scat_source
 'O'  'O'   0.0106   0.0060
 'International Tables Vol C Tables 4.2.6.8 and 6.1.1.4'
 'H'  'H'   0.0000   0.0000
 'International Tables Vol C Tables 4.2.6.8 and 6.1.1.4'
 'Zn'  'Zn'   0.2839   1.4301
 'International Tables Vol C Tables 4.2.6.8 and 6.1.1.4'
 'As'  'As'   0.0499   2.0058
 'International Tables Vol C Tables 4.2.6.8 and 6.1.1.4'
 
_space_group_crystal_system       triclinic
_space_group_IT_number            2
_space_group_name_H-M_alt         'P -1'
_space_group_name_Hall            '-P 1'
 
_shelx_space_group_comment
;
The symmetry employed for this shelxl refinement is uniquely defined
by the following loop, which should always be used as a source of
symmetry information in preference to the above space-group names.
They are only intended as comments.
;
 
loop_
 _space_group_symop_operation_xyz
 'x, y, z'
 '-x, -y, -z'
 
_cell_length_a                    4.9187(3)
_cell_length_b                    5.2357(3)
_cell_length_c                    12.8459(8)
_cell_angle_alpha                 83.987(3)
_cell_angle_beta                  81.286(3)
_cell_angle_gamma                 80.117(3)
_cell_volume                      321.09(3)
_cell_formula_units_Z             2
_cell_measurement_temperature     296(2)
_cell_measurement_reflns_used     3410
_cell_measurement_theta_min       3.220
_cell_measurement_theta_max       33.230
 
_exptl_crystal_description        fragment
_exptl_crystal_colour             colourless
_exptl_crystal_density_meas       ?
_exptl_crystal_density_method     ?
_exptl_crystal_density_diffrn     3.592          
_exptl_crystal_F_000              328
_exptl_transmission_factor_min    ?
_exptl_transmission_factor_max    ?
_exptl_crystal_size_max           0.120
_exptl_crystal_size_mid           0.120
_exptl_crystal_size_min           0.010
_exptl_absorpt_coefficient_mu     14.054
_shelx_estimated_absorpt_T_min    0.283
_shelx_estimated_absorpt_T_max    0.872
_exptl_absorpt_correction_type    'multi-scan'
_exptl_absorpt_correction_T_min   0.4800  
_exptl_absorpt_correction_T_max   0.7466
_exptl_absorpt_process_details    'SADABS'
_exptl_absorpt_special_details    ?
_diffrn_ambient_temperature       296(2)
_diffrn_radiation_wavelength      0.71073
_diffrn_radiation_type            MoK\a
_diffrn_source                    ?
_diffrn_measurement_device_type   'Bruker APEX-II CCD'
_diffrn_measurement_method        '\w- and \f-scans'
_diffrn_detector_area_resol_mean  ?
_diffrn_reflns_number             7650
_diffrn_reflns_av_unetI/netI      0.0491
_diffrn_reflns_av_R_equivalents   0.0461
_diffrn_reflns_limit_h_min        -7
_diffrn_reflns_limit_h_max        6
_diffrn_reflns_limit_k_min        -7
_diffrn_reflns_limit_k_max        7
_diffrn_reflns_limit_l_min        -18
_diffrn_reflns_limit_l_max        18
_diffrn_reflns_theta_min          3.964
_diffrn_reflns_theta_max          30.978
_diffrn_reflns_theta_full         25.242
_diffrn_measured_fraction_theta_max   0.981
_diffrn_measured_fraction_theta_full  0.988
_diffrn_reflns_Laue_measured_fraction_max    0.981
_diffrn_reflns_Laue_measured_fraction_full   0.988
_diffrn_reflns_point_group_measured_fraction_max   0.981
_diffrn_reflns_point_group_measured_fraction_full  0.988
_reflns_number_total              2011
_reflns_number_gt                 1600
_reflns_threshold_expression      'I > 2\s(I)'
_reflns_Friedel_coverage          0.000
_reflns_Friedel_fraction_max      .
_reflns_Friedel_fraction_full     .
 
_reflns_special_details
;
 Reflections were merged by SHELXL according to the crystal
 class for the calculation of statistics and refinement.
 
 _reflns_Friedel_fraction is defined as the number of unique
 Friedel pairs measured divided by the number that would be
 possible theoretically, ignoring centric projections and
 systematic absences.
;
 
_computing_data_collection        'APEX-2 (Bruker, 2012)'
_computing_cell_refinement        'SAINT (Bruker, 2012)'
_computing_data_reduction         'SAINT (Bruker, 2012)'
_computing_structure_solution     'SHELXS (Sheldrick, 2008)'
_computing_structure_refinement 'SHELXL-2018/3 (Sheldrick, 2018)'
_computing_molecular_graphics     ?
_computing_publication_material   ?
_refine_special_details           ?
_refine_ls_structure_factor_coef  Fsqd
_refine_ls_matrix_type            full
_refine_ls_weighting_scheme       calc
_refine_ls_weighting_details
'w=1/[\s^2^(Fo^2^)+(0.0522P)^2^+0.9966P] where P=(Fo^2^+2Fc^2^)/3'
_atom_sites_solution_primary      ?
_atom_sites_solution_secondary    ?
_atom_sites_solution_hydrogens    .
_refine_ls_hydrogen_treatment     none
_refine_ls_extinction_method      none
_refine_ls_extinction_coef        .
_refine_ls_number_reflns          2011
_refine_ls_number_parameters      100
_refine_ls_number_restraints      0
_refine_ls_R_factor_all           0.0548
_refine_ls_R_factor_gt            0.0380
_refine_ls_wR_factor_ref          0.0994
_refine_ls_wR_factor_gt           0.0911
_refine_ls_goodness_of_fit_ref    1.032
_refine_ls_restrained_S_all       1.032
_refine_ls_shift/su_max           0.001
_refine_ls_shift/su_mean          0.000
 
loop_
 _atom_site_label
 _atom_site_type_symbol
 _atom_site_fract_x
 _atom_site_fract_y
 _atom_site_fract_z
 _atom_site_U_iso_or_equiv
 _atom_site_adp_type
 _atom_site_occupancy
 _atom_site_site_symmetry_order  
 _atom_site_calc_flag
 _atom_site_refinement_flags_posn
 _atom_site_refinement_flags_adp
 _atom_site_refinement_flags_occupancy
 _atom_site_disorder_assembly
 _atom_site_disorder_group
Zn1 Zn 0.49183(11) 0.76394(11) 0.92434(5) 0.01255(15) Uani 1 1 d . . . . .
As1 As 0.08065(9) 0.32604(9) 0.88512(4) 0.00959(13) Uani 1 1 d . . . . .
As2 As 0.62059(10) 0.87353(11) 0.65313(4) 0.01614(14) Uani 1 1 d . . . . .
O1 O 0.0678(8) 0.1947(8) 0.7699(3) 0.0186(8) Uani 1 1 d . . . . .
O2 O 0.2404(7) 0.5862(7) 0.8421(3) 0.0156(7) Uani 1 1 d . . . . .
O3 O 0.2697(7) 0.1132(7) 0.9629(3) 0.0134(7) Uani 1 1 d . . . . .
O4 O 0.3645(9) 0.6996(10) 0.6547(3) 0.0324(11) Uani 1 1 d . . . . .
O5 O 0.6887(8) 0.8992(8) 0.7746(3) 0.0190(8) Uani 1 1 d . . . . .
O6 O 0.5457(12) 1.1676(9) 0.5854(4) 0.0383(12) Uani 1 1 d . . . . .
O7 O -0.2436(7) 0.4199(7) 0.9430(3) 0.0119(7) Uani 1 1 d . . . . .
O8 O 0.8929(10) 0.7267(11) 0.5727(4) 0.0385(12) Uani 1 1 d . . . . .
 
loop_
 _atom_site_aniso_label
 _atom_site_aniso_U_11
 _atom_site_aniso_U_22
 _atom_site_aniso_U_33
 _atom_site_aniso_U_23
 _atom_site_aniso_U_13
 _atom_site_aniso_U_12
Zn1 0.0113(3) 0.0077(3) 0.0184(3) -0.0002(2) -0.0030(2) -0.00025(19)
As1 0.0067(2) 0.0075(2) 0.0144(2) -0.00065(17) -0.00196(16) -0.00023(15)
As2 0.0123(2) 0.0216(3) 0.0154(3) -0.0014(2) -0.00151(19) -0.00570(19)
O1 0.0193(18) 0.0195(19) 0.020(2) -0.0075(15) -0.0026(15) -0.0075(15)
O2 0.0156(16) 0.0134(17) 0.0200(19) -0.0014(14) -0.0047(14) -0.0065(13)
O3 0.0115(15) 0.0082(15) 0.0208(19) 0.0017(13) -0.0052(13) -0.0014(12)
O4 0.030(2) 0.059(3) 0.016(2) -0.002(2) -0.0024(17) -0.030(2)
O5 0.0195(18) 0.023(2) 0.018(2) -0.0014(15) -0.0062(15) -0.0100(15)
O6 0.059(3) 0.023(2) 0.031(3) 0.0068(19) -0.013(2) -0.001(2)
O7 0.0066(14) 0.0084(15) 0.0193(18) 0.0009(13) -0.0003(13) 0.0003(11)
O8 0.023(2) 0.059(3) 0.033(3) -0.020(2) 0.0016(19) 0.000(2)
 
_geom_special_details
;
 All esds (except the esd in the dihedral angle between two l.s. planes)
 are estimated using the full covariance matrix.  The cell esds are taken
 into account individually in the estimation of esds in distances, angles
 and torsion angles; correlations between esds in cell parameters are only
 used when they are defined by crystal symmetry.  An approximate (isotropic)
 treatment of cell esds is used for estimating esds involving l.s. planes.
;
 
loop_
 _geom_bond_atom_site_label_1
 _geom_bond_atom_site_label_2
 _geom_bond_distance
 _geom_bond_site_symmetry_2
 _geom_bond_publ_flag
Zn1 O3 2.031(3) 1_565 ?
Zn1 O7 2.048(3) 1_655 ?
Zn1 O2 2.123(4) . ?
Zn1 O5 2.127(4) . ?
Zn1 O7 2.180(4) 2_567 ?
Zn1 O3 2.204(4) 2_667 ?
As1 O7 1.669(3) . ?
As1 O3 1.673(3) . ?
As1 O2 1.690(4) . ?
As1 O1 1.710(4) . ?
As2 O5 1.668(4) . ?
As2 O4 1.673(4) . ?
As2 O8 1.687(4) . ?
As2 O6 1.698(5) . ?
 
loop_
 _geom_angle_atom_site_label_1
 _geom_angle_atom_site_label_2
 _geom_angle_atom_site_label_3
 _geom_angle
 _geom_angle_site_symmetry_1
 _geom_angle_site_symmetry_3
 _geom_angle_publ_flag
O3 Zn1 O7 157.43(15) 1_565 1_655 ?
O3 Zn1 O2 106.94(14) 1_565 . ?
O7 Zn1 O2 91.18(14) 1_655 . ?
O3 Zn1 O5 96.45(15) 1_565 . ?
O7 Zn1 O5 97.67(15) 1_655 . ?
O2 Zn1 O5 87.65(15) . . ?
O3 Zn1 O7 88.47(14) 1_565 2_567 ?
O7 Zn1 O7 81.48(13) 1_655 2_567 ?
O2 Zn1 O7 79.79(14) . 2_567 ?
O5 Zn1 O7 167.37(14) . 2_567 ?
O3 Zn1 O3 76.83(14) 1_565 2_667 ?
O7 Zn1 O3 82.79(13) 1_655 2_667 ?
O2 Zn1 O3 167.88(15) . 2_667 ?
O5 Zn1 O3 103.53(14) . 2_667 ?
O7 Zn1 O3 88.90(14) 2_567 2_667 ?
O7 As1 O3 112.68(18) . . ?
O7 As1 O2 110.80(17) . . ?
O3 As1 O2 111.24(18) . . ?
O7 As1 O1 109.10(17) . . ?
O3 As1 O1 110.17(18) . . ?
O2 As1 O1 102.36(19) . . ?
O5 As2 O4 111.9(2) . . ?
O5 As2 O8 114.2(2) . . ?
O4 As2 O8 105.5(2) . . ?
O5 As2 O6 112.5(2) . . ?
O4 As2 O6 110.2(3) . . ?
O8 As2 O6 101.9(3) . . ?
As1 O2 Zn1 127.6(2) . . ?
As1 O3 Zn1 126.5(2) . 1_545 ?
As1 O3 Zn1 122.49(18) . 2_667 ?
Zn1 O3 Zn1 103.17(14) 1_545 2_667 ?
As2 O5 Zn1 130.4(2) . . ?
As1 O7 Zn1 130.5(2) . 1_455 ?
As1 O7 Zn1 130.56(19) . 2_567 ?
Zn1 O7 Zn1 98.52(13) 1_455 2_567 ?
 
_refine_diff_density_max    1.878
_refine_diff_density_min   -1.138
_refine_diff_density_rms    0.259

_shelx_res_file
;
TITL mw_zn_as_acid_0m in P-1
    temp.res
    created by SHELXL-2018/3 at 15:22:32 on 29-Aug-2019
CELL 0.71073   4.9187   5.2357  12.8459  83.987  81.286  80.117
ZERR    2.00   0.0003   0.0003   0.0008   0.003   0.003   0.003
LATT  1
SFAC O H ZN AS
UNIT 16 8 2 4
TEMP 23.000
L.S. 14
BOND
FMAP 2
PLAN 50
omit -4 62
omit 0 0 1
omit 0 0 2
acta
size 0.12 0.12 0.01
rem Xtal nach Messung fast zersetzt
rem erhalten aus eindunsten einer konzentrierten Zn-Arsensaeurelsg
rem daneben auch noch Kristalle von ZnHAsO4.H2O (Krautitanaolg) vorhanden!
rem deren Konzentration nimmt mit der Zeit zu, da sich das Arsensaeurematerial
rem zersetzt
WGHT    0.052200    0.996600
FVAR       0.19837
ZN1   3    0.491834    0.763938    0.924338    11.00000    0.01131    0.00765 =
         0.01839   -0.00023   -0.00301   -0.00025
AS1   4    0.080646    0.326042    0.885120    11.00000    0.00667    0.00745 =
         0.01443   -0.00065   -0.00196   -0.00023
AS2   4    0.620591    0.873529    0.653130    11.00000    0.01235    0.02161 =
         0.01540   -0.00143   -0.00151   -0.00570
O1    1    0.067801    0.194654    0.769931    11.00000    0.01932    0.01954 =
         0.01975   -0.00749   -0.00259   -0.00752
O2    1    0.240404    0.586233    0.842080    11.00000    0.01561    0.01345 =
         0.01998   -0.00136   -0.00475   -0.00653
O3    1    0.269725    0.113220    0.962917    11.00000    0.01151    0.00816 =
         0.02082    0.00173   -0.00523   -0.00144
O4    1    0.364502    0.699628    0.654689    11.00000    0.03002    0.05928 =
         0.01572   -0.00174   -0.00242   -0.03005
O5    1    0.688697    0.899225    0.774601    11.00000    0.01955    0.02310 =
         0.01779   -0.00142   -0.00625   -0.01002
O6    1    0.545747    1.167557    0.585372    11.00000    0.05904    0.02322 =
         0.03081    0.00682   -0.01282   -0.00110
O7    1   -0.243593    0.419874    0.942992    11.00000    0.00657    0.00841 =
         0.01933    0.00090   -0.00030    0.00027
O8    1    0.892882    0.726735    0.572738    11.00000    0.02274    0.05923 =
         0.03296   -0.01982    0.00157    0.00011
HKLF 4


REM  mw_zn_as_acid_0m in P-1
REM wR2 = 0.0994, GooF = S = 1.032, Restrained GooF = 1.032 for all data
REM R1 = 0.0380 for 1600 Fo > 4sig(Fo) and 0.0548 for all 2011 data
REM 100 parameters refined using 0 restraints

END

WGHT      0.0522      0.9965

REM Highest difference peak  1.878,  deepest hole -1.138,  1-sigma level  0.259
Q1    1   0.1175  0.3147  0.8254  11.00000  0.05    1.88
Q2    1   0.5341  0.7448  0.8579  11.00000  0.05    1.40
Q3    1   0.4745  0.7638  0.9939  11.00000  0.05    1.34
Q4    1   0.0463  0.3362  0.9493  11.00000  0.05    1.34
Q5    1   0.6796  0.8460  0.5981  11.00000  0.05    1.28
Q6    1  -0.1048  0.4142  0.9397  11.00000  0.05    1.14
Q7    1   0.5946  0.8750  0.7146  11.00000  0.05    1.13
Q8    1   0.1344  0.1852  0.9583  11.00000  0.05    1.12
Q9    1   0.1995  0.2592  0.8944  11.00000  0.05    1.07
Q10   1   0.2073  0.2308  0.9838  11.00000  0.05    1.03
Q11   1  -0.0478  0.4059  0.7978  11.00000  0.05    0.99
Q12   1  -0.0599  0.3792  0.8806  11.00000  0.05    0.95
Q13   1   0.7305  0.9033  0.7181  11.00000  0.05    0.93
Q14   1   0.5320  0.9708  0.7033  11.00000  0.05    0.92
Q15   1   0.2511  0.2324  0.8376  11.00000  0.05    0.92
Q16   1   0.2936  0.6010  0.7805  11.00000  0.05    0.81
Q17   1   0.4471  1.2992  0.6075  11.00000  0.05    0.79
Q18   1   0.8567  0.7066  0.7663  11.00000  0.05    0.78
Q19   1   0.2140  0.0715  0.9009  11.00000  0.05    0.77
Q20   1   0.5187  0.5834  0.9930  11.00000  0.05    0.74
Q21   1   0.6802  0.6889  0.8824  11.00000  0.05    0.72
Q22   1   0.6329  0.6530  1.0129  11.00000  0.05    0.72
Q23   1  -0.0814  0.1157  0.7762  11.00000  0.05    0.71
Q24   1   0.7455  0.7626  0.7411  11.00000  0.05    0.71
Q25   1   0.7520  0.8090  0.6560  11.00000  0.05    0.71
Q26   1   0.3386  0.6065  0.7214  11.00000  0.05    0.71
Q27   1   0.3425  0.8137  0.9230  11.00000  0.05    0.71
Q28   1   0.3109  0.7122  0.7229  11.00000  0.05    0.70
Q29   1   1.0515  0.6983  0.5863  11.00000  0.05    0.70
Q30   1   0.4605  1.1389  0.6389  11.00000  0.05    0.67
Q31   1   0.5655  0.9414  0.7558  11.00000  0.05    0.66
Q32   1   0.2485  1.3519  0.5754  11.00000  0.05    0.66
Q33   1   0.2894  0.1235  1.0143  11.00000  0.05    0.62
Q34   1   0.1633  0.1338  0.8164  11.00000  0.05    0.62
Q35   1   0.6242  0.7026  0.9190  11.00000  0.05    0.62
Q36   1   0.3563  0.1553  0.8908  11.00000  0.05    0.61
Q37   1  -0.2420  0.5141  0.9552  11.00000  0.05    0.61
Q38   1   0.5593  1.0039  0.6056  11.00000  0.05    0.61
Q39   1   0.9620  0.8453  0.5538  11.00000  0.05    0.60
Q40   1   0.4246 -0.0685  0.9887  11.00000  0.05    0.59
Q41   1   0.6983  0.8597  0.5366  11.00000  0.05    0.59
Q42   1   0.1041  0.7639  0.7739  11.00000  0.05    0.58
Q43   1  -0.1188  0.1635  0.7945  11.00000  0.05    0.58
Q44   1   0.1205  0.2945  0.7640  11.00000  0.05    0.58
Q45   1   0.7700  0.8814  0.7854  11.00000  0.05    0.57
Q46   1   0.2817  1.3925  0.6197  11.00000  0.05    0.57
Q47   1  -0.2802  0.2210  0.9492  11.00000  0.05    0.56
Q48   1   0.4618  0.6507  0.6645  11.00000  0.05    0.56
Q49   1   0.1223  0.1312  0.7447  11.00000  0.05    0.53
Q50   1   0.0010  0.5106  0.9454  11.00000  0.05    0.53
;
_shelx_res_checksum   53370

_shelx_hkl_file
;
  -1   0   0  100.03    5.30
  -1   0   0  104.91    4.96
  -1   0   0   97.06    5.25
  -1   0   0  101.17    5.04
  -1   0   0  102.08    5.27
   1   0   0   98.38    5.27
   1   0   0  102.09    4.97
   1   0   0   99.55    5.26
   1   0   0   96.40    5.03
   1   0   0  100.14    5.57
   1   0   0  102.57    5.31
  -2   0   0  112.56    5.93
  -2   0   0  114.98    5.64
  -2   0   0  110.14    5.99
  -2   0   0  108.79    5.58
   2   0   0  112.41    5.63
   2   0   0  108.85    6.27
   2   0   0  113.54    5.62
   2   0   0  109.41    5.99
   2   0   0  108.82    5.92
  -3   0   0   -0.67    0.78
  -3   0   0   -1.15    0.66
  -3   0   0   -2.26    0.65
  -3   0   0   -0.39    0.52
   3   0   0   -1.61    0.69
   3   0   0   -1.58    0.74
   3   0   0   -0.13    0.75
   3   0   0   -1.53    0.82
   3   0   0   -0.34    0.67
  -4   0   0    5.37    1.16
  -4   0   0    5.93    0.80
  -4   0   0    2.91    1.14
  -4   0   0    1.95    1.23
   4   0   0    5.15    1.08
   4   0   0    1.57    1.18
   4   0   0    3.91    1.25
   4   0   0    3.02    1.20
   4   0   0    6.52    1.24
  -5   0   0   39.49    2.86
   5   0   0   42.25    3.32
   5   0   0   50.11    3.07
   5   0   0   41.80    3.06
   5   0   0   37.62    2.93
  -6   0   0   12.59    1.89
  -6   0   0   13.99    1.91
   6   0   0   15.73    2.22
  -7   0   0   55.31    4.02
  -7   0   0   62.25    4.22
  -7   1   0    7.51    2.06
   6  -1   0   29.66    3.30
  -6   1   0   29.50    2.73
  -6   1   0   29.82    2.61
   5  -1   0    8.92    1.72
   5  -1   0    9.25    1.81
  -5   1   0    8.56    1.53
  -5   1   0    8.32    1.58
   4  -1   0   20.37    2.20
   4  -1   0   25.03    2.20
   4  -1   0   25.37    2.62
  -4   1   0   22.79    2.04
  -4   1   0   19.89    1.99
  -4   1   0   26.57    1.89
   3  -1   0  220.88   11.85
   3  -1   0  233.26   11.29
   3  -1   0  218.57   12.57
   3  -1   0  213.62   11.98
   3  -1   0  224.11   11.87
  -3   1   0  226.67   11.18
  -3   1   0  227.10   11.36
  -3   1   0  225.99   11.90
  -3   1   0  224.03   11.88
   2  -1   0   36.38    2.23
   2  -1   0   36.65    2.56
   2  -1   0   32.66    2.28
   2  -1   0   37.03    2.37
  -2   1   0   38.83    2.30
  -2   1   0   38.31    2.22
  -2   1   0   39.39    2.26
  -2   1   0   36.31    2.26
  -2   1   0   39.82    2.20
   1  -1   0    4.55    0.54
   1  -1   0    3.37    0.52
   1  -1   0    3.87    0.54
   1  -1   0    3.98    0.60
   1  -1   0    3.40    0.48
  -1   1   0    3.76    0.49
  -1   1   0    4.01    0.58
  -1   1   0    3.52    0.55
  -1   1   0    3.55    0.50
  -1   1   0    4.42    0.50
   0  -1   0   19.00    1.02
   0  -1   0   20.62    1.03
   0  -1   0   20.03    1.01
   0  -1   0   18.56    1.12
   0   1   0   18.99    1.13
   0   1   0   19.78    1.22
  -1  -1   0  628.42   30.20
   1   1   0  587.16   33.25
  -2  -1   0   31.94    1.79
  -2  -1   0   28.54    1.68
  -2  -1   0   28.84    1.84
   2   1   0   29.09    1.67
   2   1   0   27.75    1.77
   2   1   0   32.51    1.92
  -3  -1   0   62.08    3.59
  -3  -1   0   65.06    3.71
  -3  -1   0   59.21    3.39
   3   1   0   64.37    3.78
   3   1   0   64.18    3.61
   3   1   0   63.65    3.40
  -4  -1   0  150.51    8.23
  -4  -1   0  142.51    7.63
  -4  -1   0  143.97    8.09
   4   1   0  153.88    7.62
   4   1   0  151.15    8.52
   4   1   0  153.06    8.14
  -5  -1   0   15.68    1.62
   5   1   0   15.80    1.82
   5   1   0   14.07    1.75
  -6  -1   0    1.36    1.33
  -7  -1   0   20.91    2.42
  -7  -1   0   24.70    2.48
   6  -2   0    4.90    2.10
   6  -2   0    7.11    2.29
  -6   2   0    4.45    1.70
   5  -2   0   12.36    2.12
   5  -2   0    8.84    2.01
  -5   2   0    8.64    1.67
  -5   2   0   10.90    1.60
  -5   2   0    7.59    1.44
   4  -2   0   24.90    2.65
   4  -2   0   23.57    2.25
  -4   2   0   22.02    2.01
  -4   2   0   23.27    2.06
  -4   2   0   23.59    2.07
  -4   2   0   19.24    2.11
   3  -2   0    1.86    1.01
   3  -2   0    5.31    1.29
   3  -2   0   -0.90    1.08
   3  -2   0    1.02    1.15
  -3   2   0    1.78    1.00
  -3   2   0    2.18    0.96
  -3   2   0    0.93    0.95
  -3   2   0    1.53    1.08
  -3   2   0    2.21    0.90
   2  -2   0  766.17   40.58
   2  -2   0  720.24   42.80
   2  -2   0  783.72   40.52
   2  -2   0  791.34   38.08
  -2   2   0  804.29   40.52
  -2   2   0  792.15   40.46
  -2   2   0  823.83   37.98
  -2   2   0  830.05   38.50
  -2   2   0  767.10   38.92
  -2   2   0  735.90   40.45
   1  -2   0  167.68    8.87
   1  -2   0  172.71    8.41
   1  -2   0  166.85    8.87
  -1   2   0  167.32    8.42
  -1   2   0  170.07    8.86
  -1   2   0  171.28    9.42
  -1   2   0  163.68    8.61
  -1   2   0  168.49    8.30
   0  -2   0  395.56   18.58
   0  -2   0  399.98   18.85
   0  -2   0  387.80   18.62
   0   2   0  377.30   21.07
   0   2   0  353.62   19.11
  -1  -2   0   73.70    4.03
   1   2   0   81.42    4.06
   1   2   0   78.53    4.55
  -2  -2   0    1.97    0.47
  -2  -2   0    1.86    0.43
   2   2   0    2.27    0.74
  -3  -2   0  135.46    6.81
  -3  -2   0  122.91    6.36
   3   2   0  122.15    6.78
  -4  -2   0    6.20    1.22
  -4  -2   0    4.72    0.96
  -4  -2   0    6.11    1.04
   4   2   0    5.04    1.09
  -5  -2   0  136.55    7.10
   5   2   0  135.10    7.60
  -6  -2   0   25.71    2.28
  -7  -2   0   45.90    3.39
  -7  -2   0   45.45    3.44
   6  -3   0   17.40    2.95
   6  -3   0   13.08    2.75
   5  -3   0   38.81    4.10
   5  -3   0   32.21    3.27
  -5   3   0   38.08    2.93
  -5   3   0   36.23    3.04
   4  -3   0    6.53    1.81
   4  -3   0    4.05    1.74
  -4   3   0    9.74    1.43
  -4   3   0    5.51    1.46
  -4   3   0    6.39    1.47
  -4   3   0    5.61    1.14
   3  -3   0   -0.20    1.43
   3  -3   0    4.23    1.44
  -3   3   0    3.09    1.21
  -3   3   0   -2.26    1.05
  -3   3   0    4.55    1.32
  -3   3   0   -0.06    1.11
  -3   3   0    2.28    0.83
  -3   3   0    7.23    1.40
   2  -3   0   43.55    2.88
   2  -3   0   43.85    2.99
   2  -3   0   44.61    2.99
   2  -3   0   43.68    3.40
  -2   3   0   45.45    2.69
  -2   3   0   46.87    3.03
  -2   3   0   49.20    3.13
  -2   3   0   45.84    2.74
  -2   3   0   46.54    2.91
   1  -3   0  252.97   12.46
   1  -3   0  241.43   13.16
   1  -3   0  241.78   13.16
  -1   3   0  253.78   14.02
  -1   3   0  260.15   12.47
  -1   3   0  258.80   13.16
  -1   3   0  247.14   12.81
   0  -3   0    4.25    0.66
   0  -3   0    4.48    0.53
   0  -3   0    2.52    0.52
   0   3   0    3.40    0.85
   0   3   0    2.29    0.81
   1   3   0  142.30    7.23
   1   3   0  137.12    8.00
   2   3   0  147.92    8.52
  -3  -3   0   23.61    1.49
  -4  -3   0   -0.33    0.74
   4   3   0   -1.11    0.91
  -5  -3   0    8.10    1.22
   5   3   0    4.01    1.32
  -6  -3   0   24.87    2.19
   6   3   0   23.41    2.43
  -7  -3   0    3.62    1.61
   5  -4   0    0.56    2.13
   5  -4   0    4.94    2.40
  -5   4   0   -1.80    1.68
   4  -4   0   81.28    5.77
   4  -4   0   78.66    5.17
  -4   4   0   76.81    5.29
  -4   4   0   89.49    5.09
   3  -4   0   13.80    2.14
   3  -4   0   14.07    1.98
  -3   4   0   11.07    1.78
  -3   4   0   15.19    1.82
   2  -4   0  102.10    6.25
   2  -4   0  114.25    6.16
   2  -4   0  109.56    6.95
  -2   4   0  119.53    6.74
  -2   4   0  114.65    6.29
   1  -4   0    7.85    1.31
   1  -4   0    6.24    1.04
   1  -4   0    5.86    1.48
   1  -4   0    7.22    1.01
  -1   4   0    7.43    1.13
  -1   4   0    6.21    1.33
  -1   4   0    8.46    1.34
   0  -4   0   30.30    1.96
   0   4   0   23.86    2.25
   0   4   0   26.88    1.80
   0   4   0   29.30    2.34
   1   4   0   68.54    4.36
   1   4   0   67.02    3.96
   2   4   0    4.37    1.31
  -4  -4   0   18.38    1.39
   4   4   0   19.40    1.74
  -5  -4   0   76.85    4.16
   5   4   0   74.11    4.51
  -6  -4   0   30.91    2.36
   6   4   0   28.70    2.72
  -7  -4   0    3.83    1.52
   5  -5   0    4.72    2.85
   5  -5   0    4.25    2.47
   4  -5   0    7.95    2.52
   4  -5   0    5.51    2.25
  -4   5   0    4.88    2.00
   3  -5   0   66.87    5.08
   3  -5   0   66.78    4.49
  -3   5   0   67.12    4.48
  -3   5   0   64.07    4.60
   2  -5   0    0.09    1.41
   2  -5   0    0.05    1.63
  -2   5   0    0.10    1.32
  -2   5   0    1.99    1.47
   1  -5   0   69.62    4.88
   1  -5   0   72.04    4.13
  -1   5   0   69.86    4.34
  -1   5   0   67.49    4.55
  -1   5   0   65.80    4.14
   0  -5   0   24.81    2.51
   0  -5   0   24.71    1.95
   0   5   0   23.44    2.39
   0   5   0   21.61    1.75
   0   5   0   20.60    2.12
   1   5   0   10.02    1.48
   1   5   0    9.39    1.67
   2   5   0    0.89    1.35
   3   5   0    2.28    1.53
   5   5   0    0.23    1.22
  -6  -5   0   19.23    1.90
   6   5   0   17.57    2.09
   4  -6   0   32.30    3.51
   4  -6   0   36.83    4.02
   3  -6   0   -0.09    1.92
   3  -6   0    2.27    2.41
  -3   6   0    0.40    1.85
   2  -6   0   10.79    2.60
   2  -6   0   14.18    2.09
  -2   6   0    9.00    2.06
  -2   6   0   10.48    2.19
   1  -6   0   11.19    2.28
   1  -6   0   12.95    1.83
  -1   6   0   14.67    2.17
  -1   6   0   15.87    2.17
   0  -6   0    0.70    1.14
   0  -6   0   -0.74    1.47
   0   6   0   -0.35    0.99
   0   6   0   -0.10    1.48
   0   6   0    0.29    1.55
   1   6   0  127.73    7.88
   2   6   0    2.79    1.77
   3   6   0   39.15    3.51
   2  -7   0    4.33    2.05
   2  -7   0    4.80    2.78
  -2   7   0    0.77    2.12
   1  -7   0    1.04    2.29
   1  -7   0    3.68    1.72
  -1   7   0    1.89    2.00
   0  -7   0    0.03    1.90
   0  -7   0    0.70    1.44
   0   7   0    1.34    2.09
   1   7   0   -1.45    1.99
   2   7   0   66.66    5.03
   3   7   0   -1.32    2.08
   1   8   0   18.93    3.17
   2   8   0    7.93    2.69
   1   8  -1    6.87    2.62
   2   7  -1   59.55    4.73
   1   7  -1    1.26    2.10
   0   7  -1   73.68    5.19
   0  -7   1   70.09    4.10
   0  -7   1   61.80    5.09
  -1   7  -1    5.70    2.21
   1  -7   1    7.45    1.85
   1  -7   1    6.92    2.52
  -2   7  -1    8.40    2.41
   2  -7   1   14.58    3.08
   2  -7   1   12.59    2.29
   2   6  -1    0.41    1.68
   1   6  -1   51.98    4.03
  -1  -6   1   51.25    3.78
   0   6  -1    8.02    1.28
   0   6  -1   10.21    1.98
   0  -6   1   12.02    1.49
   0  -6   1    8.02    1.87
  -1   6  -1   84.53    5.80
   1  -6   1   89.53    5.08
   1  -6   1   88.45    6.01
  -2   6  -1    2.56    1.84
  -2   6  -1    4.89    1.81
   2  -6   1    2.93    1.80
   2  -6   1    5.04    2.38
   3  -6   1   16.41    2.94
   3  -6   1   12.54    2.46
   4  -6   1    5.26    2.45
   4  -6   1    6.92    2.68
   6   5  -1   -0.15    1.54
  -6  -5   1    1.10    1.18
   5   5  -1    3.13    1.39
   2   5  -1  140.31    8.44
   1   5  -1    9.18    1.69
   0   5  -1   17.55    1.97
   0   5  -1   16.16    1.85
   0   5  -1   13.91    1.38
   0  -5   1   16.89    1.48
  -1   5  -1   14.32    1.88
  -1   5  -1   10.18    1.47
  -1   5  -1   15.27    1.80
   1  -5   1   10.35    1.57
   1  -5   1   12.23    1.99
  -2   5  -1   14.99    1.97
  -2   5  -1   16.52    2.09
   2  -5   1   16.15    1.97
   2  -5   1   16.33    2.32
  -3   5  -1   49.15    3.54
  -3   5  -1   36.74    3.32
   3  -5   1   40.73    3.98
   3  -5   1   38.12    3.41
  -4   5  -1    1.65    1.89
   4  -5   1    1.88    2.11
   4  -5   1    1.05    2.27
   5  -5   1   32.87    3.66
   5  -5   1   40.40    4.16
   6   4  -1    8.47    1.83
  -6  -4   1    8.32    1.47
   5   4  -1    6.68    1.49
  -5  -4   1    6.93    1.15
   4   4  -1    1.91    1.14
  -4  -4   1    1.13    0.77
   2   4  -1   59.60    4.04
   1   4  -1  439.96   24.45
   0   4  -1    2.74    0.74
   0   4  -1    3.12    1.16
   0   4  -1    0.39    1.07
   0  -4   1    2.81    0.85
  -1   4  -1   30.37    2.35
  -1   4  -1   25.21    2.32
  -1   4  -1   27.57    2.05
   1  -4   1   27.12    2.03
   1  -4   1   26.60    2.19
   1  -4   1   25.99    2.01
  -2   4  -1    1.37    1.33
  -2   4  -1    5.66    1.27
   2  -4   1    3.50    1.56
   2  -4   1    2.50    1.35
   2  -4   1   -1.90    0.98
  -3   4  -1   10.65    1.64
  -3   4  -1   10.69    1.73
   3  -4   1    9.77    1.96
   3  -4   1    8.46    1.76
  -4   4  -1   17.98    2.21
   4  -4   1   18.83    2.64
   4  -4   1   17.49    2.41
  -5   4  -1    5.45    1.97
   5  -4   1    7.60    2.38
   5  -4   1    9.20    2.53
  -7  -3   1    5.31    1.69
   6   3  -1   27.67    2.74
  -6  -3   1   26.31    2.29
   5   3  -1    3.63    1.31
  -5  -3   1    2.92    1.06
   4   3  -1  168.29    8.49
  -4  -3   1  144.85    7.86
   3   3  -1    4.32    1.16
  -3  -3   1    5.90    0.77
   2   3  -1   -0.50    0.87
   1   3  -1    2.19    0.93
   0   3  -1  108.98    6.47
   0   3  -1  110.65    5.94
   0   3  -1  108.06    5.93
   0  -3   1  116.69    5.67
   0  -3   1  115.51    5.66
  -1   3  -1   74.85    4.32
  -1   3  -1   71.50    3.72
  -1   3  -1   74.18    4.01
  -1   3  -1   65.84    4.05
  -1   3  -1   72.53    3.67
   1  -3   1   70.42    3.99
   1  -3   1   70.95    4.00
   1  -3   1   67.28    3.88
  -2   3  -1   -2.09    0.77
  -2   3  -1   -1.05    0.88
  -2   3  -1   -2.09    1.00
  -2   3  -1   -2.19    0.78
  -2   3  -1    0.97    0.90
   2  -3   1   -1.60    0.83
   2  -3   1   -1.50    0.97
   2  -3   1   -0.74    0.91
   2  -3   1   -1.16    1.18
  -3   3  -1  160.88    8.37
  -3   3  -1  151.04    8.98
  -3   3  -1  152.78    8.52
  -3   3  -1  162.56    8.03
  -3   3  -1  163.69    8.18
  -3   3  -1  160.57    8.38
   3  -3   1  143.54    8.21
   3  -3   1  154.10    9.26
  -4   3  -1   45.63    2.90
  -4   3  -1   42.08    2.81
  -4   3  -1   39.97    3.08
  -4   3  -1   42.14    3.10
  -4   3  -1   37.17    3.21
   4  -3   1   42.89    3.33
   4  -3   1   42.90    3.64
  -5   3  -1    8.94    1.81
  -5   3  -1   13.89    1.89
   5  -3   1   11.22    2.34
   5  -3   1   10.64    2.26
   6  -3   1   34.64    3.57
   6  -3   1   38.68    4.09
  -7  -2   1    0.81    1.57
  -6  -2   1    0.67    1.27
   5   2  -1   33.75    2.63
  -5  -2   1   32.64    2.35
   4   2  -1   14.74    1.89
   4   2  -1   16.68    1.64
  -4  -2   1   16.55    1.71
  -4  -2   1   13.97    1.42
   3   2  -1  718.19   35.54
  -3  -2   1  670.23   35.60
  -3  -2   1  706.79   35.60
  -3  -2   1  648.27   33.30
  -2  -2   1   43.83    2.43
  -2  -2   1   44.69    2.38
  -2  -2   1   46.69    2.43
   1   2  -1   41.41    2.63
   0   2  -1   13.42    1.25
   0   2  -1   17.41    1.33
   0  -2   1   15.03    1.08
   0  -2   1   17.34    1.00
   0  -2   1   17.04    1.03
  -1   2  -1    8.77    0.87
  -1   2  -1    7.69    0.80
  -1   2  -1    8.61    0.74
  -1   2  -1    7.78    0.76
  -1   2  -1    6.07    0.92
   1  -2   1    6.78    0.79
   1  -2   1    7.46    0.88
   1  -2   1    8.55    0.83
   1  -2   1    7.81    0.76
  -2   2  -1   81.88    4.71
  -2   2  -1   87.36    4.49
  -2   2  -1   90.97    4.69
  -2   2  -1   81.73    4.68
  -2   2  -1   87.86    4.79
  -2   2  -1   90.27    4.55
   2  -2   1   79.41    4.59
   2  -2   1   85.97    4.76
   2  -2   1   83.05    4.85
  -3   2  -1   15.79    1.59
  -3   2  -1   17.12    1.59
  -3   2  -1   19.14    1.76
  -3   2  -1   17.48    1.71
  -3   2  -1   19.50    1.61
   3  -2   1   21.08    1.87
   3  -2   1   15.55    1.80
   3  -2   1   16.26    1.66
   3  -2   1   18.21    1.86
  -4   2  -1  180.25    9.33
  -4   2  -1  191.23    9.50
  -4   2  -1  172.62    9.99
  -4   2  -1  175.55    9.51
   4  -2   1  181.32   10.62
   4  -2   1  192.45    9.55
  -5   2  -1   23.53    2.05
  -5   2  -1   14.48    1.76
  -5   2  -1   14.20    1.93
   5  -2   1   15.57    2.22
   5  -2   1   15.71    2.34
  -6   2  -1   28.27    2.75
   6  -2   1   29.41    3.04
   6  -2   1   31.67    3.50
  -7  -1   1    1.03    1.62
  -7  -1   1    0.31    1.60
  -6  -1   1   83.65    4.87
   5   1  -1    0.45    1.18
   5   1  -1    1.40    1.50
  -5  -1   1    1.07    1.08
   4   1  -1    0.53    0.83
   4   1  -1    1.81    1.18
   4   1  -1    0.91    1.01
  -4  -1   1    0.26    0.99
  -4  -1   1    0.07    0.85
  -4  -1   1    0.31    0.93
   3   1  -1    4.44    0.99
   3   1  -1    4.04    0.74
   3   1  -1    4.35    0.85
  -3  -1   1    4.31    0.88
  -3  -1   1    4.53    0.85
  -3  -1   1    2.58    0.72
   2   1  -1  230.70   11.99
   2   1  -1  245.03   12.72
   2   1  -1  225.99   11.24
  -2  -1   1  239.53   12.03
  -2  -1   1  227.86   12.01
  -2  -1   1  208.22   11.22
  -1  -1   1   96.47    4.54
  -1  -1   1   87.38    4.59
   0   1  -1   11.55    0.66
   0   1  -1   11.03    0.77
   0   1  -1   10.81    0.82
   0  -1   1   10.40    0.64
   0  -1   1   10.63    0.76
   0  -1   1   10.81    0.65
   0  -1   1    9.48    0.69
  -1   1  -1  644.35   33.88
  -1   1  -1  652.37   32.24
  -1   1  -1  649.31   32.58
  -1   1  -1  685.60   33.98
  -1   1  -1  644.22   33.95
  -1   1  -1  626.65   31.80
   1  -1   1  656.41   33.96
   1  -1   1  665.13   33.99
   1  -1   1  675.28   33.88
   1  -1   1  676.61   32.24
   1  -1   1  642.27   31.84
  -2   1  -1   79.59    4.29
  -2   1  -1   78.86    4.16
  -2   1  -1   77.43    4.14
  -2   1  -1   78.85    4.34
  -2   1  -1   78.71    4.07
  -2   1  -1   82.78    4.35
   2  -1   1   75.11    4.41
   2  -1   1   77.84    4.28
   2  -1   1   74.22    4.14
  -3   1  -1   15.67    1.46
  -3   1  -1   16.54    1.45
  -3   1  -1   11.99    1.44
  -3   1  -1   16.44    1.45
  -3   1  -1   14.99    1.33
   3  -1   1   15.25    1.58
   3  -1   1   12.01    1.58
   3  -1   1   13.93    1.37
   3  -1   1   13.88    1.41
   3  -1   1   17.21    1.63
  -4   1  -1   42.77    2.88
  -4   1  -1   44.23    2.81
  -4   1  -1   37.47    2.90
  -4   1  -1   42.79    2.60
  -4   1  -1   42.22    2.87
   4  -1   1   42.39    2.79
   4  -1   1   40.06    2.98
   4  -1   1   36.08    3.05
   4  -1   1   41.91    3.16
  -5   1  -1   25.38    2.48
  -5   1  -1   25.41    2.30
   5  -1   1   26.27    2.78
   5  -1   1   27.86    2.40
  -6   1  -1   23.15    2.36
  -6   1  -1   20.11    2.36
   6  -1   1   22.08    2.66
  -7   1  -1   12.36    2.24
  -7   1  -1   12.18    2.29
  -7   0   1   24.69    2.65
  -7   0   1   19.78    2.47
   6   0  -1    0.79    1.88
  -6   0   1    1.41    1.39
   5   0  -1  234.87   11.41
   5   0  -1  212.24   11.97
   5   0  -1  217.01   12.02
   5   0  -1  226.94   12.72
  -5   0   1  223.54   11.33
   4   0  -1   24.63    2.38
   4   0  -1   23.55    2.17
   4   0  -1   27.42    2.29
   4   0  -1   28.44    2.07
   4   0  -1   24.51    2.09
  -4   0   1   23.50    1.97
  -4   0   1   24.93    2.11
  -4   0   1   25.21    1.73
   3   0  -1   91.43    5.70
   3   0  -1   96.70    5.16
   3   0  -1   96.80    5.33
   3   0  -1   99.26    5.44
   3   0  -1   99.00    5.39
  -3   0   1   90.23    5.06
  -3   0   1  101.40    5.44
  -3   0   1  102.39    5.07
  -3   0   1   99.17    5.37
   2   0  -1   85.59    4.49
   2   0  -1   85.17    4.52
   2   0  -1   85.78    4.73
   2   0  -1   88.98    4.73
   2   0  -1   86.00    5.03
   2   0  -1   92.07    4.80
  -2   0   1   88.83    4.50
  -2   0   1   87.73    4.74
  -2   0   1   84.32    4.47
  -2   0   1   91.51    4.78
   1   0  -1   30.64    1.67
   1   0  -1   30.90    1.68
   1   0  -1   28.92    1.68
   1   0  -1   28.11    1.79
   1   0  -1   29.39    1.60
   1   0  -1   30.15    1.58
  -1   0   1   28.02    1.57
  -1   0   1   29.91    1.67
  -1   0   1   28.52    1.57
  -1   0   1   30.29    1.66
   0   0  -1   -0.02    0.03
   0   0  -1   -0.04    0.06
   0   0  -1    0.01    0.06
   0   0  -1    0.02    0.03
   0   0  -1    0.00    0.05
   0   0  -1    0.02    0.06
   0   0   1   -0.03    0.03
   0   0   1    0.01    0.03
   0   0   1   -0.04    0.03
   0   0   1    0.01    0.07
   0   0   1   -0.01    0.03
  -1   0  -1   10.17    0.73
  -1   0  -1   11.10    0.75
  -1   0  -1   11.82    0.76
  -1   0  -1   10.41    0.67
  -1   0  -1   10.83    0.82
  -1   0  -1   10.47    0.71
   1   0   1   11.30    0.67
   1   0   1   11.48    0.73
   1   0   1   10.18    0.80
   1   0   1   11.22    0.72
   1   0   1   10.16    0.77
  -2   0  -1  371.75   18.96
  -2   0  -1  400.80   19.83
  -2   0  -1  375.98   18.59
  -2   0  -1  377.73   19.89
   2   0   1  393.12   19.79
   2   0   1  384.89   19.80
   2   0   1  387.11   18.61
   2   0   1  383.36   18.94
   2   0   1  361.39   19.85
   2   0   1  375.39   20.89
  -3   0  -1   46.37    2.93
  -3   0  -1   47.33    2.70
  -3   0  -1   46.58    2.79
  -3   0  -1   44.48    2.52
   3   0   1   44.27    2.72
   3   0   1   48.13    3.00
   3   0   1   47.61    2.82
   3   0   1   45.83    2.89
  -4   0  -1  197.88   11.01
  -4   0  -1  203.62   11.13
  -4   0  -1  206.86   10.38
  -4   0  -1  195.25   10.36
   4   0   1  215.79   10.41
   4   0   1  210.85   10.93
   4   0   1  217.35   11.05
   4   0   1  202.94   11.02
   4   0   1  198.58   11.57
  -5   0  -1   15.34    1.70
  -5   0  -1   11.29    1.72
   5   0   1   14.64    1.80
   5   0   1   11.47    1.50
   5   0   1   16.32    1.76
   5   0   1   15.64    1.71
  -6   0  -1   14.94    1.97
  -6   0  -1   12.80    1.88
  -7   0  -1   10.77    2.13
  -7   0  -1   12.74    2.13
  -7   1   1    1.08    1.75
   6  -1  -1    4.76    2.00
  -6   1   1    0.56    1.51
  -6   1   1    3.39    1.50
   5  -1  -1    4.21    1.57
   5  -1  -1    8.42    1.79
  -5   1   1    3.80    1.29
   4  -1  -1   87.88    5.11
   4  -1  -1   93.87    5.15
   4  -1  -1   87.56    5.59
   4  -1  -1   88.50    5.36
  -4   1   1   90.63    4.86
  -4   1   1   86.89    4.88
   3  -1  -1   22.80    2.10
   3  -1  -1   26.93    2.38
   3  -1  -1   24.57    1.97
   3  -1  -1   21.36    1.88
   3  -1  -1   22.30    1.86
  -3   1   1   23.30    1.85
  -3   1   1   24.47    1.87
  -3   1   1   27.03    1.83
  -3   1   1   26.49    1.94
   2  -1  -1    6.32    0.96
   2  -1  -1    5.54    0.76
   2  -1  -1    5.46    0.82
   2  -1  -1    5.82    0.90
  -2   1   1    7.03    0.80
  -2   1   1    6.16    0.81
  -2   1   1    5.35    0.76
  -2   1   1    5.46    0.74
  -2   1   1    5.20    0.77
   1  -1  -1  628.04   32.38
   1  -1  -1  621.73   30.42
   1  -1  -1  609.07   32.44
   1  -1  -1  646.36   34.25
   1  -1  -1  628.47   32.45
  -1   1   1  612.05   32.42
  -1   1   1  634.46   32.44
  -1   1   1  649.82   30.41
  -1   1   1  617.32   32.39
  -1   1   1  621.98   31.13
   0  -1  -1  283.76   15.07
   0  -1  -1  280.24   13.59
   0  -1  -1  286.73   13.38
   0  -1  -1  279.48   13.39
   0  -1  -1  283.30   13.71
   0   1   1  250.99   15.10
   0   1   1  260.55   13.70
   0   1   1  276.82   13.59
   1   1   1   67.73    3.86
  -2  -1  -1   -0.11    0.54
  -2  -1  -1    0.73    0.44
   2   1   1   -0.13    0.38
   2   1   1    0.15    0.43
  -3  -1  -1  109.45    5.88
  -3  -1  -1  105.75    5.57
  -3  -1  -1  108.86    6.03
   3   1   1  109.95    5.54
   3   1   1  111.56    5.91
   3   1   1  107.96    6.15
  -4  -1  -1   14.30    1.76
  -4  -1  -1   15.57    1.53
  -4  -1  -1   12.66    1.50
   4   1   1   11.86    1.56
   4   1   1   18.53    1.47
   4   1   1   16.38    1.46
  -5  -1  -1   29.91    2.33
   5   1   1   29.25    2.47
   5   1   1   30.94    2.60
  -6  -1  -1   11.97    1.92
  -6  -1  -1   16.13    1.92
  -7  -1  -1   21.07    2.39
  -7  -1  -1   18.92    2.33
   6  -2  -1    4.39    2.25
   6  -2  -1    1.16    2.05
  -6   2   1    4.13    1.62
   5  -2  -1   58.97    4.40
   5  -2  -1   57.25    4.07
  -5   2   1   56.58    3.59
  -5   2   1   57.00    3.78
  -5   2   1   52.27    3.59
   4  -2  -1    6.26    1.65
   4  -2  -1    1.99    1.49
  -4   2   1    1.86    1.11
  -4   2   1    4.05    1.15
  -4   2   1    0.83    1.11
   3  -2  -1   15.61    1.80
   3  -2  -1   15.94    1.57
   3  -2  -1   16.77    1.75
   3  -2  -1   13.95    1.64
  -3   2   1   16.82    1.48
  -3   2   1   13.35    1.43
  -3   2   1   15.51    1.58
  -3   2   1   16.89    1.57
   2  -2  -1   84.53    5.00
   2  -2  -1   89.99    5.38
   2  -2  -1   84.14    4.81
   2  -2  -1   87.51    4.94
  -2   2   1   91.16    4.86
  -2   2   1   90.63    4.65
  -2   2   1   93.70    4.95
  -2   2   1   90.12    4.84
   1  -2  -1   53.22    3.29
   1  -2  -1   50.64    2.82
   1  -2  -1   52.34    2.90
   1  -2  -1   49.01    2.89
  -1   2   1   51.57    2.73
  -1   2   1   52.38    2.96
  -1   2   1   51.33    2.89
  -1   2   1   52.08    2.78
   0  -2  -1  349.14   19.12
   0  -2  -1  355.26   16.91
   0   2   1  340.96   19.18
   0   2   1  347.82   17.41
  -1  -2  -1   23.56    1.40
   1   2   1   21.72    1.40
   1   2   1   22.85    1.65
  -2  -2  -1  263.15   12.84
   2   2   1  264.12   14.64
  -3  -2  -1   63.93    3.43
  -3  -2  -1   62.86    3.28
   3   2   1   57.57    3.45
  -4  -2  -1    9.50    1.43
  -4  -2  -1    9.48    1.19
  -4  -2  -1    9.70    1.16
   4   2   1    9.25    1.26
  -5  -2  -1    6.29    1.25
   5   2   1    3.66    1.38
  -6  -2  -1   12.37    1.67
  -6  -2  -1   12.71    1.73
  -7  -2  -1   26.49    2.60
  -7  -2  -1   23.74    2.48
   6  -3  -1   30.35    3.58
   6  -3  -1   29.00    3.37
   5  -3  -1    9.79    2.32
   5  -3  -1    4.54    2.14
  -5   3   1    7.27    1.64
  -5   3   1    6.96    1.57
   4  -3  -1   12.64    2.09
   4  -3  -1   10.73    2.02
  -4   3   1    9.46    1.64
  -4   3   1   10.67    1.66
  -4   3   1   12.37    1.51
   3  -3  -1   69.79    4.62
   3  -3  -1   75.56    5.08
  -3   3   1   77.33    4.34
  -3   3   1   78.38    4.27
  -3   3   1   76.71    4.48
  -3   3   1   75.91    4.31
  -3   3   1   81.44    4.53
   2  -3  -1   60.07    3.75
   2  -3  -1   57.87    3.68
   2  -3  -1   60.32    3.69
   2  -3  -1   60.39    4.17
  -2   3   1   60.06    3.46
  -2   3   1   69.45    4.04
  -2   3   1   63.37    3.71
  -2   3   1   62.48    3.42
  -2   3   1   60.15    3.71
   1  -3  -1   25.40    1.94
   1  -3  -1   27.85    1.82
   1  -3  -1   25.36    1.80
   1  -3  -1   27.51    2.27
  -1   3   1   25.35    1.68
  -1   3   1   32.60    2.15
  -1   3   1   27.44    2.03
  -1   3   1   26.09    1.86
  -1   3   1   27.29    1.69
   0  -3  -1   14.28    1.60
   0  -3  -1   15.02    1.09
   0  -3  -1   16.20    1.12
   0   3   1   14.56    1.47
   0   3   1   15.47    1.49
   1   3   1  165.49    9.49
   1   3   1  169.53    8.57
   2   3   1    7.41    1.18
  -3  -3  -1   27.77    1.63
  -4  -3  -1    7.17    1.06
   4   3   1    4.42    1.10
  -5  -3  -1   29.72    2.10
   5   3   1   25.95    2.26
  -6  -3  -1   16.88    1.83
  -6  -3  -1   16.38    1.83
   6   3   1   12.74    2.07
  -7  -3  -1   45.36    3.30
   5  -4  -1    2.62    2.30
   5  -4  -1    7.74    2.58
  -5   4   1    3.76    1.82
   4  -4  -1   23.15    2.88
   4  -4  -1   20.35    2.61
  -4   4   1   22.34    2.52
  -4   4   1   22.94    2.37
   3  -4  -1    6.77    1.73
   3  -4  -1    7.32    1.83
  -3   4   1    8.32    1.64
  -3   4   1    8.12    1.63
   2  -4  -1  273.96   14.57
   2  -4  -1  270.14   13.82
   2  -4  -1  267.86   15.55
  -2   4   1  269.64   15.43
  -2   4   1  287.90   14.20
   1  -4  -1   30.29    2.06
   1  -4  -1   31.18    2.86
   1  -4  -1   27.47    2.06
   1  -4  -1   30.09    2.32
  -1   4   1   28.97    2.43
  -1   4   1   30.77    2.18
  -1   4   1   32.50    2.54
   0  -4  -1   85.84    5.18
   0  -4  -1   87.67    4.41
   0   4   1   79.80    4.72
   0   4   1   81.10    4.54
   0   4   1   81.72    5.13
  -1  -4  -1   71.73    4.56
   1   4   1   76.43    4.70
   1   4   1   76.12    4.26
   2   4   1    9.54    1.49
   3   4   1   21.79    2.30
  -4  -4  -1   15.94    1.31
  -5  -4  -1   51.94    2.98
   5   4   1   46.39    3.24
  -6  -4  -1   12.13    1.57
  -6  -4  -1   12.14    1.53
   6   4   1    9.01    1.80
  -7  -4  -1   11.98    1.77
   5  -5  -1   13.75    3.25
   5  -5  -1   12.31    2.81
   4  -5  -1    0.08    2.32
   4  -5  -1    1.43    2.15
  -4   5   1    0.12    1.74
  -4   5   1    0.48    1.84
   3  -5  -1   -1.70    1.73
   3  -5  -1    0.19    1.92
  -3   5   1    1.67    1.63
  -3   5   1    2.39    1.62
   2  -5  -1   10.16    2.07
   2  -5  -1    9.73    1.79
  -2   5   1    9.33    1.77
  -2   5   1   10.14    1.81
   1  -5  -1   93.85    6.05
   1  -5  -1   94.02    5.29
  -1   5   1   97.45    5.42
  -1   5   1   90.43    5.48
  -1   5   1   93.93    5.91
   0  -5  -1    5.01    1.49
   0  -5  -1    6.64    1.17
   0   5   1    6.98    1.47
   0   5   1    3.99    1.00
   0   5   1    6.78    1.51
  -1  -5  -1   23.44    2.39
   1   5   1   26.81    2.53
   1   5   1   30.39    2.33
   2   5   1   18.61    2.12
   3   5   1   17.28    2.16
   5   5   1   71.49    4.24
  -6  -5  -1    4.39    1.28
  -6  -5  -1    6.66    1.33
   6   5   1   -0.17    1.48
   4  -6  -1   73.75    5.27
   3  -6  -1   10.82    2.35
   3  -6  -1    8.81    2.76
  -3   6   1    8.34    2.20
   2  -6  -1   33.10    3.74
   2  -6  -1   33.99    3.13
  -2   6   1   35.95    3.29
  -2   6   1   34.83    3.29
   1  -6  -1   17.05    1.99
   1  -6  -1   18.05    2.48
  -1   6   1   16.76    2.23
  -1   6   1   15.68    2.27
   0  -6  -1    1.35    1.60
   0  -6  -1    5.94    1.29
   0   6   1    4.17    1.58
   0   6   1    6.05    1.83
   0   6   1    3.12    1.11
   1   6   1   48.64    3.32
   1   6   1   43.76    3.67
   2   6   1   17.19    2.35
   3   6   1   63.75    4.66
   2  -7  -1    1.35    1.91
   2  -7  -1    4.41    2.78
  -2   7   1   -0.11    1.96
   1  -7  -1   30.35    2.81
   1  -7  -1   26.68    3.31
  -1   7   1   27.37    3.21
  -1   7   1   25.55    2.94
   0  -7  -1    8.01    2.21
   0  -7  -1    7.54    1.60
   0   7   1    6.63    2.01
   0   7   1    7.83    2.32
   1   7   1    4.32    2.15
   2   7   1    1.16    2.12
   3   7   1   31.54    3.40
   1   8   1   27.54    3.51
   2   8   1    4.59    2.58
   2   7  -2    4.55    2.24
   1   7  -2    2.80    2.12
   1   7  -2    3.21    1.15
   0   7  -2   37.41    3.61
   0  -7   2   35.89    2.68
   0  -7   2   31.95    3.40
  -1   7  -2   -0.59    2.00
   1  -7   2   -0.04    2.41
   1  -7   2    2.42    1.66
   2  -7   2   47.63    4.64
   2  -7   2   48.73    3.77
   2   6  -2    3.89    1.86
   1   6  -2   11.41    2.12
   0   6  -2   20.11    1.99
   0   6  -2   24.68    2.62
   0  -6   2   25.05    2.09
  -1   6  -2    4.04    1.80
   1  -6   2    6.19    1.63
   1  -6   2    8.45    2.06
  -2   6  -2    7.27    2.03
   2  -6   2   12.08    2.55
   2  -6   2    7.53    2.00
   3  -6   2   33.74    3.72
   3  -6   2   31.37    3.17
   4  -6   2   -0.24    2.27
   4  -6   2    3.24    2.61
   6   5  -2    1.66    1.70
  -6  -5   2    1.08    1.28
   5   5  -2    1.69    1.57
  -5  -5   2    1.55    1.01
  -4  -5   2    1.47    0.80
   2   5  -2   72.22    4.85
   1   5  -2    4.65    1.53
   0   5  -2  151.45    8.91
   0   5  -2  145.41    8.10
   0  -5   2  155.91    7.70
  -1   5  -2   68.55    4.17
  -1   5  -2   69.39    4.61
   1  -5   2   69.51    4.10
  -2   5  -2   14.00    1.90
  -2   5  -2   16.63    2.08
   2  -5   2   11.58    1.86
   2  -5   2   14.89    2.23
  -3   5  -2   29.21    2.92
  -3   5  -2   31.70    3.13
   3  -5   2   34.28    3.12
   3  -5   2   33.49    3.34
   4  -5   2   10.17    2.62
   4  -5   2   11.47    2.46
   5  -5   2   31.16    3.63
   5  -5   2   22.76    3.19
   6   4  -2   65.75    4.40
  -6  -4   2   60.05    3.81
   5   4  -2   -1.22    1.39
  -5  -4   2    0.06    0.98
   4   4  -2    6.23    1.46
  -4  -4   2    5.24    0.95
   2   4  -2   49.99    3.60
   1   4  -2   22.77    2.35
  -1  -4   2   25.38    1.63
   0   4  -2   25.07    2.22
   0   4  -2   22.88    1.72
   0  -4   2   23.34    1.81
  -1   4  -2  126.40    7.57
  -1   4  -2  132.28    7.07
  -1   4  -2  125.65    7.06
   1  -4   2  133.98    7.17
   1  -4   2  126.02    7.09
   1  -4   2  134.34    6.78
  -2   4  -2    5.94    1.29
  -2   4  -2    3.10    1.41
   2  -4   2    8.19    1.42
  -3   4  -2    9.83    1.59
  -3   4  -2   10.01    1.76
   3  -4   2   11.41    1.84
   3  -4   2    9.38    1.92
  -4   4  -2    2.08    1.61
   4  -4   2    3.86    1.89
   4  -4   2    3.19    1.98
   5  -4   2   31.11    3.46
   5  -4   2   25.73    3.13
  -7  -3   2   -1.53    1.48
  -6  -3   2   -0.50    1.30
   5   3  -2   36.76    2.78
  -5  -3   2   32.99    2.40
   4   3  -2   97.00    5.33
  -4  -3   2   86.24    4.81
   3   3  -2    3.93    1.34
  -3  -3   2    7.86    0.96
  -2  -3   2  432.53   21.32
   1   3  -2  285.74   16.34
  -1  -3   2  295.72   14.53
  -1  -3   2  297.17   14.28
   0   3  -2   44.41    2.73
   0   3  -2   48.96    3.10
   0  -3   2   48.12    2.57
   0  -3   2   45.85    2.61
  -1   3  -2  120.20    6.89
  -1   3  -2  114.94    6.38
  -1   3  -2  123.24    6.46
  -1   3  -2  116.62    5.97
   1  -3   2  125.35    6.19
   1  -3   2  125.18    6.52
   1  -3   2  114.16    6.15
   1  -3   2  116.23    6.48
  -2   3  -2   70.36    4.40
  -2   3  -2   71.37    4.24
  -2   3  -2   74.02    4.20
  -2   3  -2   70.86    3.88
  -2   3  -2   77.69    4.01
   2  -3   2   71.37    4.12
   2  -3   2   69.54    4.36
   2  -3   2   71.12    4.17
  -3   3  -2   44.08    2.65
  -3   3  -2   39.51    3.03
  -3   3  -2   44.10    2.95
  -3   3  -2   37.26    2.83
  -3   3  -2   45.22    2.78
  -3   3  -2   41.89    2.92
   3  -3   2   37.27    3.07
   3  -3   2   43.43    3.43
  -4   3  -2    1.71    1.02
  -4   3  -2    2.76    1.27
  -4   3  -2    0.22    1.31
  -4   3  -2    4.44    1.36
  -4   3  -2    0.50    1.32
   4  -3   2    3.25    1.71
   4  -3   2    2.87    1.60
  -5   3  -2   37.41    2.95
   5  -3   2   31.69    3.17
   5  -3   2   35.76    3.61
   6  -3   2   33.54    3.43
   6  -3   2   35.03    3.64
  -7  -2   2   -0.35    1.59
  -6  -2   2   10.42    1.66
   5   2  -2    8.86    1.64
  -5  -2   2   11.82    1.43
   4   2  -2   21.79    2.18
   4   2  -2   18.08    1.89
  -4  -2   2   19.97    1.67
  -4  -2   2   19.08    1.83
   3   2  -2  113.54    5.78
   3   2  -2   88.75    6.17
  -3  -2   2  108.82    5.31
  -3  -2   2  110.53    5.68
  -3  -2   2   93.65    5.81
   2   2  -2   15.46    1.41
  -2  -2   2   15.84    1.36
   1   2  -2  492.36   28.74
  -1  -2   2  554.06   25.76
  -1  -2   2  532.94   25.37
  -1  -2   2  513.34   25.37
   0   2  -2   10.55    1.18
   0   2  -2   11.75    0.96
   0  -2   2   10.26    0.97
   0  -2   2   10.91    0.87
  -1   2  -2   69.77    4.19
  -1   2  -2   74.67    3.78
  -1   2  -2   72.17    3.97
  -1   2  -2   72.97    3.70
  -1   2  -2   69.83    3.94
   1  -2   2   74.63    4.04
   1  -2   2   71.71    4.00
   1  -2   2   73.94    3.80
   1  -2   2   71.23    3.82
  -2   2  -2    1.74    0.93
  -2   2  -2    1.82    0.47
  -2   2  -2    2.58    0.97
  -2   2  -2    5.09    0.77
  -2   2  -2    3.37    0.72
  -2   2  -2    4.85    0.83
  -2   2  -2    2.81    0.80
   2  -2   2    2.07    0.89
   2  -2   2    1.44    0.77
   2  -2   2    3.90    0.89
  -3   2  -2  115.56    5.79
  -3   2  -2  113.32    5.87
  -3   2  -2  108.22    5.95
  -3   2  -2  111.66    6.08
  -3   2  -2  112.02    6.18
   3  -2   2  108.39    6.65
   3  -2   2  104.82    6.09
   3  -2   2  103.16    6.27
   3  -2   2  108.24    5.93
  -4   2  -2   13.62    1.60
  -4   2  -2    6.14    1.44
  -4   2  -2    6.66    1.59
  -4   2  -2    9.97    1.46
   4  -2   2    9.69    1.78
  -5   2  -2   37.45    2.83
  -5   2  -2   35.72    2.95
   5  -2   2   34.12    3.13
   5  -2   2   36.35    3.40
  -6   2  -2   25.62    2.58
   6  -2   2   21.84    2.86
   6  -2   2   24.18    2.79
  -7  -1   2   16.93    2.30
  -6  -1   2   29.36    2.58
   5   1  -2    0.46    1.60
  -5  -1   2    1.63    1.10
   4   1  -2  303.69   14.78
   4   1  -2  315.38   16.68
   4   1  -2  298.29   15.76
  -4  -1   2  313.04   15.82
  -4  -1   2  259.15   14.73
   3   1  -2  133.01    6.99
   3   1  -2  145.76    7.96
   3   1  -2  141.84    7.47
  -3  -1   2  139.99    7.47
  -3  -1   2  129.29    6.98
  -3  -1   2  139.01    7.01
   2   1  -2  103.24    6.40
   2   1  -2  111.86    5.53
   2   1  -2  116.67    5.95
  -2  -1   2  109.02    5.53
  -2  -1   2  104.72    5.98
  -2  -1   2  112.86    5.88
   1   1  -2  284.15   15.37
   1   1  -2  255.02   13.56
   1   1  -2  292.11   14.53
  -1  -1   2  284.05   13.77
  -1  -1   2  277.65   14.49
  -1  -1   2  281.76   14.51
   0   1  -2  275.99   13.42
   0   1  -2  274.05   15.13
   0  -1   2  274.91   14.33
   0  -1   2  260.99   14.33
   0  -1   2  276.40   13.40
   0  -1   2  290.53   13.60
  -1   1  -2  160.66    8.32
  -1   1  -2  161.97    8.66
  -1   1  -2  159.04    9.07
  -1   1  -2  155.86    8.21
  -1   1  -2  161.08    8.09
  -1   1  -2  178.38    8.69
   1  -1   2  166.75    8.66
   1  -1   2  168.07    8.62
   1  -1   2  162.46    8.20
   1  -1   2  171.01    8.71
   1  -1   2  166.27    8.14
  -2   1  -2   14.20    1.33
  -2   1  -2   14.20    1.19
  -2   1  -2   15.18    1.35
  -2   1  -2   13.05    1.14
  -2   1  -2   13.23    1.26
  -2   1  -2   12.98    1.24
   2  -1   2   13.28    1.38
   2  -1   2   15.50    1.37
   2  -1   2   15.73    1.21
  -3   1  -2  189.93    9.21
  -3   1  -2  181.67    9.66
  -3   1  -2  179.67    9.17
  -3   1  -2  181.68    9.68
  -3   1  -2  180.02    9.04
   3  -1   2  176.94    9.57
   3  -1   2  164.81    9.71
   3  -1   2  176.01    9.10
   3  -1   2  182.69    9.58
   3  -1   2  180.07   10.20
  -4   1  -2  138.91    7.26
  -4   1  -2  138.48    7.23
  -4   1  -2  146.59    7.39
  -4   1  -2  135.40    7.72
  -4   1  -2  137.99    7.73
   4  -1   2  131.21    7.78
   4  -1   2  142.92    8.16
   4  -1   2  133.38    7.59
   4  -1   2  142.44    7.35
  -5   1  -2   24.83    2.36
  -5   1  -2   25.25    2.41
   5  -1   2   25.87    2.48
   5  -1   2   24.47    2.75
  -6   1  -2   82.06    5.04
  -6   1  -2   86.37    5.18
   6  -1   2   83.51    5.69
  -7   1  -2    2.88    1.99
  -7   1  -2    2.38    1.90
  -7   0   2    4.12    1.90
  -7   0   2    6.71    1.99
   6   0  -2    4.41    2.13
  -6   0   2    3.90    1.54
   5   0  -2   43.87    3.39
   5   0  -2   34.55    3.00
   5   0  -2   41.20    3.04
   5   0  -2   39.36    3.01
  -5   0   2   41.15    2.82
   4   0  -2    2.71    1.29
   4   0  -2    4.00    1.18
   4   0  -2    3.97    1.21
   4   0  -2    1.66    1.08
   4   0  -2    4.63    1.14
  -4   0   2    3.01    0.82
  -4   0   2    3.00    1.02
  -4   0   2    3.83    1.09
   3   0  -2  557.60   27.67
   3   0  -2  512.66   29.10
   3   0  -2  520.74   27.59
   3   0  -2  534.43   25.94
   3   0  -2  546.43   27.59
  -3   0   2  525.75   26.38
  -3   0   2  535.93   27.60
  -3   0   2  524.27   27.61
  -3   0   2  511.97   25.88
   2   0  -2    7.54    0.85
   2   0  -2    6.28    0.81
   2   0  -2    8.64    0.92
   2   0  -2    5.95    0.81
   2   0  -2    6.96    0.82
  -2   0   2    6.82    0.78
  -2   0   2    6.83    0.70
  -2   0   2    7.48    0.78
  -2   0   2    6.64    0.83
   1   0  -2  309.99   15.74
   1   0  -2  275.99   16.61
   1   0  -2  314.61   15.79
   1   0  -2  297.33   15.74
  -1   0   2  306.14   15.11
  -1   0   2  327.25   15.78
  -1   0   2  303.52   15.73
  -1   0   2  304.01   15.72
  -1   0   2  288.94   14.75
   0   0  -2    9.51    0.85
   0   0  -2   11.17    0.82
   0   0  -2    9.94    0.74
   0   0  -2    8.71    0.78
   0   0  -2   10.50    0.74
   0   0   2    9.38    0.79
   0   0   2    9.20    0.71
   0   0   2   10.15    0.76
   0   0   2    9.60    0.85
  -1   0  -2  133.82    6.89
  -1   0  -2  136.42    7.40
  -1   0  -2  142.59    7.37
  -1   0  -2  145.06    7.33
  -1   0  -2  136.01    6.99
   1   0   2  136.31    7.34
   1   0   2  151.17    7.34
   1   0   2  143.10    6.90
   1   0   2  138.69    7.38
  -2   0  -2   38.53    2.43
  -2   0  -2   38.02    2.23
  -2   0  -2   38.84    2.19
  -2   0  -2   38.34    2.31
   2   0   2   38.63    2.22
   2   0   2   38.55    2.24
   2   0   2   40.12    2.27
   2   0   2   39.84    2.39
   2   0   2   40.15    2.14
  -3   0  -2   53.31    3.01
  -3   0  -2   50.91    3.05
  -3   0  -2   54.94    3.16
  -3   0  -2   52.21    3.30
   3   0   2   54.05    3.26
   3   0   2   52.18    3.03
   3   0   2   54.64    3.14
   3   0   2   52.88    3.06
   3   0   2   52.27    3.35
  -4   0  -2  116.00    6.66
  -4   0  -2  109.24    6.12
  -4   0  -2  112.59    6.52
  -4   0  -2  117.32    6.29
   4   0   2  122.54    6.18
   4   0   2  115.94    6.51
   4   0   2  120.29    6.38
   4   0   2  113.03    6.83
   4   0   2  122.51    6.56
  -5   0  -2    4.62    1.37
  -5   0  -2    2.58    1.38
   5   0   2    3.47    1.35
   5   0   2    2.26    1.11
   5   0   2    6.01    1.36
   5   0   2    6.14    1.41
  -6   0  -2   14.99    2.02
  -6   0  -2   14.72    1.98
  -7   0  -2   18.34    2.42
  -7   0  -2   19.93    2.51
  -7   1   2   -0.22    1.76
   6  -1  -2   75.86    5.31
  -6   1   2   73.13    4.65
  -6   1   2   70.47    4.51
   5  -1  -2   14.72    1.98
   5  -1  -2   10.71    2.06
  -5   1   2   11.24    1.62
   4  -1  -2   28.03    2.76
   4  -1  -2   24.04    2.16
   4  -1  -2   26.72    2.43
   4  -1  -2   29.32    2.52
  -4   1   2   25.68    2.03
  -4   1   2   25.78    2.07
   3  -1  -2   29.49    2.10
   3  -1  -2   27.52    2.26
   3  -1  -2   28.67    2.18
   3  -1  -2   25.59    2.49
   3  -1  -2   29.09    2.09
  -3   1   2   29.63    2.06
  -3   1   2   28.16    2.01
  -3   1   2   29.09    2.01
  -3   1   2   28.80    2.08
   2  -1  -2  113.02    7.06
   2  -1  -2  125.20    6.68
   2  -1  -2  119.04    6.29
   2  -1  -2  125.09    6.61
  -2   1   2  121.53    6.59
  -2   1   2  123.38    6.24
  -2   1   2  128.18    6.62
  -2   1   2  127.95    6.63
  -2   1   2  125.63    6.37
   1  -1  -2   80.59    4.36
   1  -1  -2   80.97    4.68
   1  -1  -2   82.13    4.37
   1  -1  -2   80.31    4.33
   1  -1  -2   80.24    4.12
  -1   1   2   81.95    4.33
  -1   1   2   81.22    4.34
  -1   1   2   79.30    4.21
  -1   1   2   82.16    4.10
   0  -1  -2   60.95    3.25
   0  -1  -2   64.18    3.40
   0  -1  -2   64.68    3.33
   0  -1  -2   65.81    3.21
   0  -1  -2   63.28    3.43
   0  -1  -2   66.67    3.33
   0  -1  -2   67.32    3.66
   0   1   2   64.82    3.41
   0   1   2   62.20    3.32
   0   1   2   64.93    3.20
  -1  -1  -2  376.59   18.25
  -1  -1  -2  378.03   18.51
  -1  -1  -2  404.14   18.25
   1   1   2  351.24   18.68
   1   1   2  369.86   20.62
  -2  -1  -2  352.21   17.56
  -2  -1  -2  369.56   18.70
  -2  -1  -2  362.79   18.76
   2   1   2  362.68   18.69
   2   1   2  355.42   17.52
  -3  -1  -2  150.21    8.12
  -3  -1  -2  152.37    7.99
  -3  -1  -2  144.26    7.53
   3   1   2  152.70    7.48
   3   1   2  157.66    8.01
   3   1   2  142.98    8.35
  -4  -1  -2  251.31   13.67
  -4  -1  -2  256.72   12.86
  -4  -1  -2  260.80   13.85
   4   1   2  252.34   14.29
   4   1   2  261.67   12.79
   4   1   2  265.96   13.69
  -5  -1  -2    4.84    1.26
  -5  -1  -2    2.48    1.23
   5   1   2    4.45    1.35
  -6  -1  -2   17.85    2.01
  -6  -1  -2   14.74    2.03
  -7  -1  -2    6.57    1.97
  -7  -1  -2    7.68    1.89
   6  -2  -2   -1.78    2.01
   6  -2  -2    2.14    2.17
  -6   2   2    1.81    1.55
   5  -2  -2  157.60    9.44
   5  -2  -2  157.06    8.56
  -5   2   2  152.79    8.21
  -5   2   2  159.26    8.38
  -5   2   2  150.33    8.32
   4  -2  -2    7.70    1.76
   4  -2  -2   10.86    1.87
  -4   2   2   11.17    1.44
  -4   2   2   10.63    1.42
   3  -2  -2   85.88    4.95
   3  -2  -2   87.78    5.11
   3  -2  -2   84.98    5.61
   3  -2  -2   86.68    4.99
  -3   2   2   86.43    4.86
  -3   2   2   89.08    4.71
  -3   2   2   83.91    4.86
  -3   2   2   90.35    4.98
   2  -2  -2    7.12    1.08
   2  -2  -2    6.76    1.04
   2  -2  -2    8.57    1.26
   2  -2  -2    6.95    1.02
  -2   2   2   10.23    0.99
  -2   2   2    9.71    1.03
  -2   2   2    7.86    0.85
  -2   2   2    9.88    1.08
   1  -2  -2   16.97    1.66
   1  -2  -2   18.84    1.34
   1  -2  -2   17.69    1.28
   1  -2  -2   17.36    1.30
  -1   2   2   18.05    1.50
  -1   2   2   18.77    1.30
  -1   2   2   17.38    1.21
  -1   2   2   16.85    1.33
   0  -2  -2   62.26    3.59
   0  -2  -2   61.37    3.08
   0  -2  -2   63.23    3.08
   0   2   2   60.15    3.29
   0   2   2   60.72    3.07
   0   2   2   55.75    3.56
  -1  -2  -2   20.73    1.29
  -1  -2  -2   19.91    1.35
   1   2   2   19.51    1.48
   1   2   2   18.65    1.31
  -2  -2  -2  500.08   23.39
   2   2   2  463.67   26.51
  -3  -2  -2   79.91    4.14
   3   2   2   79.09    4.36
  -4  -2  -2   62.18    3.44
  -4  -2  -2   61.78    3.82
  -4  -2  -2   58.85    3.56
   4   2   2   61.46    3.62
  -5  -2  -2   44.16    2.94
  -5  -2  -2   45.75    2.93
   5   2   2   45.79    3.17
  -6  -2  -2    7.76    1.59
  -6  -2  -2    6.13    1.48
  -7  -2  -2   13.96    1.96
  -7  -2  -2   10.35    1.97
   6  -3  -2    4.63    2.57
   6  -3  -2    4.78    2.50
   5  -3  -2    4.06    2.17
   5  -3  -2    1.63    2.18
  -5   3   2    5.69    1.51
  -5   3   2    3.85    1.59
   4  -3  -2   38.97    3.66
   4  -3  -2   38.86    3.34
  -4   3   2   41.59    2.98
  -4   3   2   38.94    2.74
  -4   3   2   40.63    3.03
   3  -3  -2   13.58    1.92
   3  -3  -2   11.69    1.83
  -3   3   2   14.15    1.63
  -3   3   2   11.45    1.40
  -3   3   2   13.36    1.47
  -3   3   2   13.84    1.42
  -3   3   2   12.35    1.23
   2  -3  -2   23.49    2.04
   2  -3  -2   21.46    2.13
   2  -3  -2   26.85    2.54
   2  -3  -2   26.75    1.97
  -2   3   2   27.38    1.93
  -2   3   2   24.75    1.85
  -2   3   2   27.24    2.00
  -2   3   2   26.21    2.14
   1  -3  -2   80.89    5.20
   1  -3  -2   84.71    4.71
   1  -3  -2   82.28    4.53
   1  -3  -2   88.12    4.74
  -1   3   2   85.67    4.38
  -1   3   2   88.13    5.16
  -1   3   2   88.94    4.74
  -1   3   2   86.72    4.75
   0  -3  -2  109.01    6.27
   0  -3  -2  107.94    5.41
   0   3   2  107.90    6.29
   0   3   2  110.63    5.75
   0   3   2  105.97    5.72
  -1  -3  -2   59.08    3.42
   1   3   2   57.19    3.19
   1   3   2   54.24    3.52
   2   3   2  327.10   18.66
   2   3   2  343.83   16.79
  -3  -3  -2   12.35    1.08
   3   3   2   13.88    1.55
  -4  -3  -2   22.29    1.68
   4   3   2   17.00    1.72
  -5  -3  -2   10.50    1.36
  -5  -3  -2   11.13    1.39
   5   3   2   11.04    1.51
  -6  -3  -2   -2.29    1.28
  -6  -3  -2   -2.92    1.29
   6   3   2   -5.81    1.45
  -7  -3  -2   16.08    2.00
   5  -4  -2   20.49    3.07
   5  -4  -2   29.18    3.42
  -5   4   2   23.17    2.57
  -5   4   2   20.26    2.92
   4  -4  -2    0.05    1.87
   4  -4  -2    1.41    1.93
  -4   4   2    3.92    1.81
  -4   4   2    1.25    1.54
   3  -4  -2    3.23    1.66
   3  -4  -2    5.04    1.75
  -3   4   2    6.40    1.53
  -3   4   2    4.81    1.58
   2  -4  -2   32.52    3.13
   2  -4  -2   30.18    2.77
  -2   4   2   38.14    2.80
  -2   4   2   38.16    2.83
   1  -4  -2   21.58    1.96
   1  -4  -2   22.21    1.72
   1  -4  -2   21.99    1.77
   1  -4  -2   22.85    2.54
  -1   4   2   22.78    2.13
  -1   4   2   24.74    2.24
  -1   4   2   21.22    1.81
   0  -4  -2  224.30   12.47
   0  -4  -2  226.44   10.95
   0   4   2  215.23   11.38
   0   4   2  214.88   12.51
   0   4   2  222.81   11.57
  -1  -4  -2   84.34    5.02
   1   4   2   80.88    5.12
   1   4   2   86.11    4.69
   2   4   2  148.95    7.49
   2   4   2  137.90    8.36
   3   4   2   99.50    6.11
  -5  -4  -2   22.84    1.87
  -5  -4  -2   19.54    1.80
   5   4   2   18.06    1.89
  -6  -4  -2   30.02    2.34
  -6  -4  -2   28.11    2.31
   6   4   2   26.64    2.59
  -7  -4  -2    2.35    1.46
   5  -5  -2    6.75    2.67
   4  -5  -2   11.15    2.90
   4  -5  -2   10.20    2.45
  -4   5   2   10.96    2.26
  -4   5   2   10.53    2.11
   3  -5  -2   21.92    2.68
   3  -5  -2   24.63    3.01
  -3   5   2   22.15    2.63
  -3   5   2   27.89    2.62
   2  -5  -2   16.84    2.11
   2  -5  -2   18.63    2.40
  -2   5   2   18.03    2.13
  -2   5   2   17.25    2.22
   1  -5  -2    0.27    1.41
   1  -5  -2    4.24    1.66
  -1   5   2    5.87    1.48
  -1   5   2   -0.44    1.19
  -1   5   2    5.86    1.50
   0  -5  -2   94.79    5.84
   0  -5  -2   92.83    5.01
   0   5   2   99.30    5.43
   0   5   2   92.18    5.85
   0   5   2   90.21    5.18
  -1  -5  -2   28.96    2.48
   1   5   2   28.95    2.33
   1   5   2   28.20    2.65
   2   5   2   33.45    2.46
   2   5   2   32.10    2.86
   3   5   2   30.89    2.88
  -5  -5  -2   19.82    1.65
   5   5   2   17.54    1.81
  -6  -5  -2   -2.62    1.14
   6   5   2   -4.85    1.36
   4  -6  -2   22.63    3.12
   3  -6  -2    4.54    2.69
   3  -6  -2    2.58    2.08
  -3   6   2    3.14    2.00
   2  -6  -2   57.76    4.00
   2  -6  -2   57.72    4.78
  -2   6   2   54.17    4.27
  -2   6   2   52.86    4.01
   1  -6  -2    8.33    1.75
   1  -6  -2   10.84    2.22
  -1   6   2   10.57    1.95
  -1   6   2    7.94    1.98
   0  -6  -2   67.45    4.82
   0  -6  -2   76.49    4.13
   0   6   2   69.95    4.82
   0   6   2   65.36    4.16
   0   6   2   71.64    4.44
   1   6   2   52.52    4.07
   1   6   2   56.97    3.70
   2   6   2    2.90    1.75
   3   6   2   30.71    3.11
   2  -7  -2   14.91    2.37
   2  -7  -2   18.09    3.38
  -2   7   2   12.61    2.58
   1  -7  -2   12.74    2.80
   1  -7  -2   13.17    1.95
  -1   7   2    8.65    2.24
  -1   7   2    8.44    2.36
   0  -7  -2   14.67    1.82
   0   7   2   13.80    2.31
   0   7   2   14.90    2.59
   1   7   2   21.96    2.99
   2   7   2    0.55    2.04
   3   7   2    5.34    2.34
   1   8   2   15.73    3.02
   2   8   2    1.95    2.51
   2   7  -3   18.92    2.93
   1   7  -3   11.55    2.57
   0   7  -3   12.57    2.54
   0  -7   3   13.13    1.76
   0  -7   3   11.28    2.50
  -1   7  -3   11.93    2.50
   1  -7   3   10.49    1.90
   1  -7   3   10.08    2.83
   2  -7   3   26.72    3.64
   2  -7   3   27.49    2.78
   5   6  -3    5.69    1.91
   2   6  -3   49.16    3.97
   1   6  -3    2.78    1.83
   1   6  -3    3.28    1.19
  -1  -6   3    3.52    1.14
   0   6  -3   -0.75    1.62
   0   6  -3   -0.09    1.10
   0  -6   3    0.58    1.17
  -1   6  -3    4.11    1.89
   1  -6   3    6.31    1.60
   2  -6   3   41.15    3.46
   2  -6   3   51.91    4.44
   3  -6   3    4.12    2.07
   3  -6   3    3.97    2.50
   4  -6   3   29.32    3.29
   6   5  -3   -0.40    1.83
  -6  -5   3    1.65    1.33
   5   5  -3   65.72    4.37
  -5  -5   3   64.13    3.74
   4   5  -3   23.23    2.47
  -4  -5   3   31.21    2.06
   2   5  -3   35.59    3.14
   1   5  -3   41.07    3.33
  -1  -5   3   41.58    2.52
   0   5  -3   37.52    2.56
   0   5  -3   40.33    3.20
   0  -5   3   40.56    2.54
  -1   5  -3    3.06    1.40
   1  -5   3    0.96    1.23
  -2   5  -3   74.72    5.00
   2  -5   3   79.31    4.63
   3  -5   3   39.18    3.37
   3  -5   3   43.34    4.04
   4  -5   3    6.13    2.20
   4  -5   3    4.93    2.46
   5  -5   3   47.11    4.25
   5  -5   3   53.66    4.89
   6   4  -3    6.33    2.05
  -6  -4   3    6.01    1.52
   5   4  -3    1.17    1.70
  -5  -4   3    1.98    1.13
   4   4  -3   93.42    5.79
  -4  -4   3  101.67    5.19
   3   4  -3    0.66    1.33
  -3  -4   3   -0.02    1.01
  -2  -4   3    3.27    1.06
   1   4  -3   20.13    2.00
  -1  -4   3   17.27    1.50
   0   4  -3  124.75    7.28
   0   4  -3  120.41    6.68
   0  -4   3  123.97    6.30
  -1   4  -3    4.99    1.07
  -1   4  -3    4.43    1.26
   1  -4   3    6.50    1.17
   1  -4   3    4.89    1.18
   1  -4   3    5.74    1.16
  -2   4  -3   70.49    4.40
   2  -4   3   67.45    4.14
  -3   4  -3   27.66    2.46
   3  -4   3   26.55    3.00
   3  -4   3   27.69    2.53
   4  -4   3    1.52    1.92
   4  -4   3    1.28    1.85
   5  -4   3    2.79    2.20
   5  -4   3    4.19    2.43
  -7  -3   3   44.75    3.37
  -6  -3   3   13.62    1.86
   5   3  -3   13.35    1.92
  -5  -3   3   11.00    1.51
   4   3  -3   37.69    2.89
  -4  -3   3   37.73    2.45
   3   3  -3   59.89    4.04
  -3  -3   3   68.57    3.63
   2   3  -3   39.07    2.44
  -2  -3   3   41.33    2.46
  -2  -3   3   44.74    2.75
   1   3  -3   13.97    1.45
  -1  -3   3   11.84    1.12
  -1  -3   3    9.33    1.06
  -1  -3   3   12.28    1.13
   0   3  -3  395.08   20.32
   0   3  -3  390.31   21.58
   0  -3   3  382.28   19.25
   0  -3   3  391.10   19.03
  -1   3  -3  218.69   11.83
  -1   3  -3  231.41   12.57
   1  -3   3  224.45   11.95
   1  -3   3  230.22   11.29
   1  -3   3  226.46   11.91
   1  -3   3  216.00   11.17
  -2   3  -3   30.07    2.29
  -2   3  -3   31.52    2.16
  -2   3  -3   32.77    2.12
  -2   3  -3   32.37    2.29
  -2   3  -3   30.81    2.39
   2  -3   3   30.88    2.27
   2  -3   3   30.81    2.49
   2  -3   3   28.97    2.40
  -3   3  -3  156.53    8.33
  -3   3  -3  160.09    8.12
  -3   3  -3  149.21    8.45
  -3   3  -3  158.40    7.96
  -3   3  -3  149.73    8.85
  -3   3  -3  160.34    8.32
   3  -3   3  149.71    8.16
  -4   3  -3    4.27    1.33
  -4   3  -3    3.92    1.50
   4  -3   3    3.12    1.65
   4  -3   3    5.16    1.76
  -5   3  -3   40.93    3.09
   5  -3   3   38.04    3.75
   5  -3   3   36.38    3.40
   6  -3   3   12.12    2.61
   6  -3   3   16.74    2.86
  -7  -2   3   -1.38    1.56
  -6  -2   3   73.37    4.44
   5   2  -3    0.19    1.39
  -5  -2   3    0.34    1.11
   4   2  -3   23.38    2.16
   4   2  -3   23.76    2.44
  -4  -2   3   23.55    1.91
  -4  -2   3   22.30    1.92
   3   2  -3   31.52    3.09
   3   2  -3   37.37    2.09
   3   2  -3   37.05    2.66
  -3  -2   3   37.58    2.29
  -3  -2   3   37.03    2.34
  -3  -2   3   31.49    2.72
   2   2  -3  194.13   10.20
   2   2  -3  165.32    9.67
  -2  -2   3  182.14    9.55
  -2  -2   3  187.73    9.08
  -2  -2   3  186.93    9.50
  -2  -2   3  168.10    9.03
  -1  -2   3   18.27    1.30
  -1  -2   3   17.07    1.55
   0   2  -3   71.66    4.15
   0   2  -3   65.99    3.67
   0   2  -3   69.20    3.72
   0  -2   3   72.46    3.66
   0  -2   3   75.02    3.86
   0  -2   3   71.63    3.64
   0  -2   3   65.04    3.96
  -1   2  -3  315.95   15.52
  -1   2  -3  308.27   16.28
  -1   2  -3  324.45   17.28
  -1   2  -3  317.81   16.34
  -1   2  -3  306.32   15.29
   1  -2   3  315.24   16.41
   1  -2   3  314.16   15.54
   1  -2   3  307.66   16.43
   1  -2   3  310.36   15.38
  -2   2  -3   -0.04    0.23
  -2   2  -3    0.74    0.72
  -2   2  -3    0.35    0.69
  -2   2  -3   -0.64    0.77
  -2   2  -3   -0.24    0.93
  -2   2  -3    0.54    0.77
  -2   2  -3   -0.48    0.60
   2  -2   3    0.19    0.79
   2  -2   3    0.33    0.87
   2  -2   3    0.54    0.76
  -3   2  -3   29.95    2.31
  -3   2  -3   27.85    2.03
  -3   2  -3   26.69    2.17
  -3   2  -3   25.77    2.13
  -3   2  -3   25.25    2.06
  -3   2  -3   27.79    2.19
   3  -2   3   25.54    2.32
   3  -2   3   27.36    2.37
   3  -2   3   23.86    2.05
  -4   2  -3    7.86    1.45
  -4   2  -3    7.47    1.42
   4  -2   3    7.92    1.70
   4  -2   3    5.32    1.51
  -5   2  -3   45.72    3.24
  -5   2  -3   43.71    3.33
   5  -2   3   44.49    3.45
   5  -2   3   46.01    3.73
  -6   2  -3    7.17    1.98
   6  -2   3    5.84    2.23
   6  -2   3    4.98    2.08
  -7  -1   3    1.76    1.77
  -6  -1   3    6.72    1.64
   5   1  -3   20.31    2.54
  -5  -1   3   18.50    1.85
   4   1  -3   34.92    2.67
   4   1  -3   38.58    3.22
   4   1  -3   36.41    2.55
  -4  -1   3   37.98    2.59
  -4  -1   3   34.77    2.44
  -4  -1   3   36.85    2.27
   3   1  -3   23.93    1.95
   3   1  -3   24.14    2.50
   3   1  -3   23.18    1.78
  -3  -1   3   23.59    1.98
  -3  -1   3   20.67    1.68
  -3  -1   3   22.16    1.68
  -3  -1   3   22.23    1.63
   2   1  -3  338.59   17.41
   2   1  -3  317.19   18.46
   2   1  -3  342.50   16.27
  -2  -1   3  352.62   16.31
  -2  -1   3  297.25   17.43
  -2  -1   3  346.36   17.34
   1   1  -3  248.14   14.64
   1   1  -3  256.71   12.88
   1   1  -3  275.08   13.85
  -1  -1   3  258.49   13.74
  -1  -1   3  250.57   13.02
  -1  -1   3  269.65   13.81
  -1  -1   3  291.64   13.11
   0   1  -3  196.72   10.33
   0   1  -3  191.72    9.74
   0   1  -3  201.51   10.36
   0   1  -3  198.44    9.89
   0  -1   3  205.23   10.39
   0  -1   3  194.24    9.69
   0  -1   3  180.32   10.44
   0  -1   3  216.49    9.87
  -1   1  -3  132.25    6.84
  -1   1  -3  142.60    7.65
  -1   1  -3  135.71    7.37
  -1   1  -3  146.07    7.38
  -1   1  -3  136.10    6.95
   1  -1   3  135.57    7.35
   1  -1   3  142.78    7.40
   1  -1   3  140.01    7.29
   1  -1   3  133.98    6.88
  -2   1  -3   14.48    1.25
  -2   1  -3   14.70    1.42
  -2   1  -3   15.77    1.36
  -2   1  -3   14.44    1.45
  -2   1  -3   14.66    1.29
   2  -1   3   14.43    1.25
   2  -1   3   15.13    1.46
   2  -1   3   16.00    1.42
  -3   1  -3  140.29    7.37
  -3   1  -3  143.60    7.89
  -3   1  -3  143.14    7.91
  -3   1  -3  149.19    7.49
   3  -1   3  145.53    7.43
   3  -1   3  144.18    7.94
   3  -1   3  147.77    7.80
   3  -1   3  138.17    7.77
  -4   1  -3   20.65    1.88
  -4   1  -3   16.03    1.83
  -4   1  -3   18.06    1.79
   4  -1   3   20.39    1.88
   4  -1   3   17.38    1.76
   4  -1   3   21.43    2.03
   4  -1   3   16.37    1.92
  -5   1  -3    8.34    1.62
  -5   1  -3    6.07    1.57
   5  -1   3    7.03    1.59
   5  -1   3    7.36    1.66
  -6   1  -3   32.03    2.93
  -6   1  -3   30.82    3.02
   6  -1   3   37.22    3.37
  -7   1  -3    8.94    2.27
  -7   1  -3    8.87    2.24
  -7   0   3    0.11    1.72
  -7   0   3    0.75    1.77
   6   0  -3   19.79    2.81
  -6   0   3   17.09    2.11
   5   0  -3    5.27    1.83
   5   0  -3    7.49    1.57
   5   0  -3    4.64    1.51
  -5   0   3    4.89    1.37
   4   0  -3   61.47    3.97
   4   0  -3   64.93    4.36
   4   0  -3   62.51    3.91
   4   0  -3   63.90    3.82
  -4   0   3   61.66    3.66
  -4   0   3   63.44    3.57
   3   0  -3    0.70    0.92
   3   0  -3    0.40    1.04
   3   0  -3    0.96    0.95
   3   0  -3    0.60    0.90
   3   0  -3   -0.51    0.88
  -3   0   3   -0.35    0.83
  -3   0   3    0.85    0.69
  -3   0   3    1.00    0.76
  -3   0   3    0.55    0.75
   2   0  -3   32.56    2.07
   2   0  -3   30.29    1.93
   2   0  -3   31.53    2.03
   2   0  -3   30.51    2.36
   2   0  -3   29.83    1.97
  -2   0   3   31.02    1.89
  -2   0   3   31.24    1.90
  -2   0   3   30.74    1.93
   1   0  -3  363.45   20.50
   1   0  -3  369.56   19.39
   1   0  -3  355.73   19.47
   1   0  -3  379.58   18.16
   1   0  -3  383.53   19.40
  -1   0   3  366.34   19.44
  -1   0   3  385.01   19.38
  -1   0   3  382.21   18.20
   0   0  -3   46.15    2.48
   0   0  -3   41.97    2.29
   0   0  -3   38.07    2.61
   0   0  -3   37.89    2.35
   0   0  -3   43.69    2.43
   0   0   3   42.51    2.30
   0   0   3   42.82    2.52
   0   0   3   43.69    2.37
   0   0   3   39.28    2.41
  -1   0  -3  244.22   11.88
  -1   0  -3  232.62   11.70
  -1   0  -3  238.82   12.57
  -1   0  -3  240.43   12.47
  -1   0  -3  239.59   12.49
  -1   0  -3  234.46   12.53
   1   0   3  254.67   12.56
   1   0   3  221.55   11.70
   1   0   3  249.81   12.48
   1   0   3  243.70   12.51
  -2   0  -3    6.51    0.99
  -2   0  -3    5.68    0.75
  -2   0  -3    6.33    0.75
  -2   0  -3    6.36    0.84
   2   0   3    5.78    0.73
   2   0   3    6.65    0.75
   2   0   3    7.36    0.88
   2   0   3    6.94    0.74
   2   0   3    6.31    0.63
  -3   0  -3   65.46    3.52
  -3   0  -3   60.51    3.54
  -3   0  -3   62.74    3.86
  -3   0  -3   61.94    3.71
   3   0   3   65.17    3.52
   3   0   3   64.27    3.76
   3   0   3   65.29    3.61
   3   0   3   64.65    3.68
  -4   0  -3    1.63    1.27
  -4   0  -3    0.88    1.08
  -4   0  -3    0.56    1.02
  -4   0  -3    1.81    1.10
   4   0   3    2.05    1.07
   4   0   3    1.58    1.04
   4   0   3   -1.50    1.01
   4   0   3    0.96    1.11
  -5   0  -3   92.17    5.38
  -5   0  -3   98.92    5.49
   5   0   3  100.54    5.37
   5   0   3   93.04    5.46
   5   0   3   99.62    5.66
   5   0   3   96.29    5.96
  -6   0  -3    0.74    1.55
  -6   0  -3    2.50    1.53
  -7   0  -3    3.40    1.89
  -7   0  -3    5.30    1.97
  -7   1   3    2.81    1.97
   6  -1  -3   18.66    2.79
  -6   1   3   14.20    2.08
   5  -1  -3    0.12    1.68
   5  -1  -3    0.30    1.57
  -5   1   3    1.25    1.21
   4  -1  -3  101.26    5.83
   4  -1  -3   98.40    6.13
   4  -1  -3  101.24    5.50
   4  -1  -3   90.13    5.57
  -4   1   3   98.49    5.29
  -4   1   3   94.59    5.30
   3  -1  -3  147.69    8.15
   3  -1  -3  151.39    8.14
   3  -1  -3  148.67    8.24
   3  -1  -3  147.08    8.72
   3  -1  -3  149.72    7.78
  -3   1   3  160.08    7.80
  -3   1   3  140.49    8.07
  -3   1   3  152.10    7.66
  -3   1   3  153.43    8.14
   2  -1  -3  158.29    8.26
   2  -1  -3  170.40    8.74
   2  -1  -3  169.14    9.33
   2  -1  -3  165.91    8.79
  -2   1   3  159.53    8.20
  -2   1   3  154.59    8.68
  -2   1   3  170.61    8.74
  -2   1   3  165.01    8.39
   1  -1  -3   83.62    4.50
   1  -1  -3   89.80    4.79
   1  -1  -3   94.76    4.84
   1  -1  -3   85.05    5.14
  -1   1   3   94.20    4.80
  -1   1   3   95.54    4.80
  -1   1   3   87.55    4.51
  -1   1   3   83.20    4.62
   0  -1  -3   55.17    2.91
   0  -1  -3   43.20    2.72
   0  -1  -3   53.71    2.75
   0  -1  -3   44.19    2.80
   0  -1  -3   52.21    2.80
   0  -1  -3   50.81    3.05
   0   1   3   51.06    2.75
   0   1   3   54.70    2.65
   0   1   3   53.94    2.77
   0   1   3   49.76    2.80
   0   1   3   57.99    2.84
  -1  -1  -3   77.00    3.86
  -1  -1  -3   82.50    4.34
  -1  -1  -3   78.70    3.80
  -1  -1  -3   75.46    4.03
   1   1   3   77.74    4.31
   1   1   3   77.32    3.91
   1   1   3   75.99    4.03
   1   1   3   63.23    3.90
  -2  -1  -3    1.16    0.51
  -2  -1  -3    0.17    0.48
  -2  -1  -3    1.14    0.50
  -2  -1  -3    0.16    0.74
   2   1   3    0.74    0.49
   2   1   3    0.34    0.47
   2   1   3    1.50    0.44
  -3  -1  -3   30.78    1.92
  -3  -1  -3   28.78    2.17
  -3  -1  -3   28.44    1.92
  -3  -1  -3   28.05    1.85
   3   1   3   25.79    1.93
   3   1   3   29.64    1.94
   3   1   3   28.71    1.80
  -4  -1  -3   42.86    2.66
  -4  -1  -3   40.29    3.02
  -4  -1  -3   43.29    2.79
  -4  -1  -3   38.06    2.71
   4   1   3   46.48    2.84
   4   1   3   38.15    2.87
   4   1   3   42.66    2.59
  -5  -1  -3   23.47    2.18
  -5  -1  -3   23.10    2.09
   5   1   3   25.23    2.29
  -6  -1  -3  144.54    7.76
  -6  -1  -3  145.39    7.88
  -7  -1  -3    3.30    1.77
  -7  -1  -3    3.48    1.90
   6  -2  -3   10.04    2.58
   6  -2  -3   11.31    2.60
  -6   2   3   12.56    2.03
   5  -2  -3    4.07    2.02
   5  -2  -3    5.80    2.09
  -5   2   3    5.12    1.41
  -5   2   3    5.23    1.51
   4  -2  -3   15.34    2.03
   4  -2  -3   14.72    2.10
  -4   2   3   16.11    1.69
  -4   2   3   13.71    1.56
   3  -2  -3  107.38    5.93
   3  -2  -3  100.58    6.58
   3  -2  -3  111.23    6.23
  -3   2   3  109.80    6.05
  -3   2   3  109.02    5.72
  -3   2   3  109.58    5.88
  -3   2   3  107.98    5.97
   2  -2  -3   46.31    2.88
   2  -2  -3   46.28    3.36
   2  -2  -3   44.65    2.91
   2  -2  -3   45.77    2.83
  -2   2   3   48.82    2.84
  -2   2   3   45.41    2.86
  -2   2   3   49.53    2.71
  -2   2   3   49.42    2.76
   1  -2  -3   89.83    4.81
   1  -2  -3   85.70    5.18
   1  -2  -3   87.52    4.76
  -1   2   3   87.62    4.70
  -1   2   3   85.53    4.68
  -1   2   3   93.11    4.48
  -1   2   3   83.62    4.83
  -1   2   3   88.30    4.76
   0  -2  -3   52.33    2.84
   0  -2  -3   53.70    2.82
   0  -2  -3   55.54    2.74
   0  -2  -3   54.35    3.16
   0   2   3   47.23    3.13
   0   2   3   49.55    2.80
   0   2   3   48.92    2.60
   0   2   3   50.49    2.87
  -1  -2  -3  103.32    5.14
  -1  -2  -3  104.65    5.06
  -1  -2  -3  104.78    5.74
   1   2   3  103.73    5.28
   1   2   3   97.43    5.85
  -2  -2  -3    0.34    0.43
  -2  -2  -3    0.42    0.44
  -2  -2  -3    1.47    0.45
   2   2   3    0.85    0.68
  -3  -2  -3  141.75    7.55
  -3  -2  -3  141.15    7.15
  -3  -2  -3  133.97    7.24
  -3  -2  -3  149.10    7.69
   3   2   3  148.35    7.60
  -4  -2  -3    3.60    0.97
  -4  -2  -3    1.13    0.89
  -4  -2  -3    3.98    0.97
  -4  -2  -3    3.57    1.30
   4   2   3    2.12    1.00
  -5  -2  -3   -2.03    1.10
  -5  -2  -3   -1.00    1.06
   5   2   3   -3.29    1.20
  -6  -2  -3    7.69    1.54
  -6  -2  -3    7.56    1.60
  -7  -2  -3   43.80    3.43
  -7  -2  -3   48.73    3.44
   6  -3  -3   23.35    3.35
   6  -3  -3   22.57    3.33
   5  -3  -3   34.16    3.38
   5  -3  -3   34.76    3.45
  -5   3   3   27.31    2.66
  -5   3   3   29.67    2.86
   4  -3  -3   26.29    2.78
   4  -3  -3   29.92    2.75
  -4   3   3   24.85    2.43
  -4   3   3   23.81    2.22
  -4   3   3   25.86    2.38
   3  -3  -3  102.55    6.62
   3  -3  -3  103.05    5.89
  -3   3   3  106.92    5.86
  -3   3   3  105.50    5.91
  -3   3   3  103.40    5.67
  -3   3   3  105.03    5.80
  -3   3   3  107.16    5.58
   2  -3  -3   30.09    2.15
   2  -3  -3   31.62    2.85
   2  -3  -3   30.31    2.24
   2  -3  -3   27.76    2.21
  -2   3   3   26.84    2.05
  -2   3   3   27.96    2.11
  -2   3   3   29.91    1.96
  -2   3   3   26.92    2.26
   1  -3  -3   22.45    1.60
   1  -3  -3   19.78    1.66
   1  -3  -3   20.32    2.24
   1  -3  -3   24.77    1.65
  -1   3   3   22.24    1.48
  -1   3   3   22.43    1.65
  -1   3   3   25.43    2.06
  -1   3   3   17.97    1.86
   0  -3  -3    0.10    0.55
   0  -3  -3    0.15    0.82
   0   3   3    0.94    0.52
   0   3   3   -0.14    0.76
   0   3   3    0.28    0.70
  -1  -3  -3   77.67    4.26
   1   3   3   67.72    4.39
   1   3   3   72.12    3.96
   2   3   3  132.34    7.71
   2   3   3  135.03    6.84
  -3  -3  -3   13.42    1.22
  -3  -3  -3   13.58    1.18
   3   3   3   15.00    1.59
  -4  -3  -3  263.75   12.88
  -4  -3  -3  245.22   13.03
   4   3   3  272.00   13.72
  -5  -3  -3    3.35    1.15
  -5  -3  -3    3.45    1.12
   5   3   3    2.80    1.22
  -6  -3  -3   23.07    2.27
  -6  -3  -3   24.30    2.28
   6   3   3   25.07    2.51
  -7  -3  -3    4.17    1.69
   5  -4  -3   45.59    4.46
   5  -4  -3   39.37    3.92
  -5   4   3   44.64    3.54
  -5   4   3   37.90    4.11
   4  -4  -3    7.76    2.24
   4  -4  -3    8.56    2.31
  -4   4   3    8.31    1.78
  -4   4   3    6.43    2.16
   3  -4  -3   35.73    3.11
   3  -4  -3   39.85    3.61
  -3   4   3   38.92    3.23
  -3   4   3   38.40    2.95
   2  -4  -3   39.90    2.99
   2  -4  -3   42.37    3.53
  -2   4   3   41.21    2.97
  -2   4   3   43.52    3.23
   1  -4  -3   30.02    2.14
   1  -4  -3   31.58    2.24
   1  -4  -3   32.37    2.20
   1  -4  -3   31.64    2.83
  -1   4   3   31.23    2.19
  -1   4   3   29.61    2.59
  -1   4   3   28.91    2.44
   0  -4  -3   13.40    1.53
   0  -4  -3   13.35    1.30
   0   4   3   11.64    1.52
   0   4   3   11.34    1.21
   0   4   3   13.15    1.47
  -1  -4  -3  113.57    6.38
   1   4   3  111.49    5.90
   1   4   3  103.25    6.51
   2   4   3   18.73    2.05
   2   4   3   19.29    1.68
   3   4   3    2.51    1.28
  -4  -4  -3   11.94    1.14
  -4  -4  -3   11.89    1.15
  -5  -4  -3   76.32    4.20
  -5  -4  -3   73.57    4.20
   5   4   3   77.11    4.50
  -6  -4  -3    1.50    1.26
  -6  -4  -3    3.42    1.30
   6   4   3   -1.12    1.40
  -7  -4  -3   16.18    2.01
   4  -5  -3    7.09    2.45
   4  -5  -3   11.80    2.83
  -4   5   3    8.27    2.02
  -4   5   3    9.56    2.25
   3  -5  -3   15.75    2.68
   3  -5  -3   14.36    2.35
  -3   5   3   16.80    2.33
  -3   5   3   14.77    2.17
   2  -5  -3    9.70    2.10
   2  -5  -3    9.35    1.78
  -2   5   3   10.47    1.91
  -2   5   3    7.21    1.68
   1  -5  -3   33.56    3.27
   1  -5  -3   31.42    2.57
  -1   5   3   33.63    2.47
  -1   5   3   36.14    2.77
  -1   5   3   32.19    2.92
   0  -5  -3   84.54    5.35
   0  -5  -3   81.86    4.53
   0   5   3   86.29    5.41
   0   5   3   81.73    4.72
   0   5   3   86.55    4.97
  -1  -5  -3   15.51    1.68
   1   5   3   15.80    1.89
   1   5   3   16.74    1.77
   2   5   3  182.44   11.05
   2   5   3  198.95    9.93
   3   5   3    1.62    1.43
  -6  -5  -3   -0.85    1.19
   6   5   3   -3.06    1.43
   3  -6  -3    4.48    2.75
   3  -6  -3    1.18    2.02
  -3   6   3    1.24    2.02
   2  -6  -3   12.06    2.19
   2  -6  -3   16.84    2.98
  -2   6   3   15.84    2.27
  -2   6   3   13.20    2.37
   1  -6  -3   22.12    2.30
   1  -6  -3   21.42    2.78
  -1   6   3   24.68    2.52
  -1   6   3   24.62    2.72
   0  -6  -3   31.11    3.18
   0  -6  -3   33.87    2.49
   0   6   3   32.90    2.78
   0   6   3   26.40    2.30
   0   6   3   29.90    2.97
   1   6   3    4.49    1.46
   1   6   3    3.43    1.68
   2   6   3   17.16    1.91
   2   6   3   17.94    2.37
   3   6   3   43.86    3.70
   4   6   3   -0.93    1.83
   2  -7  -3   13.78    2.35
   2  -7  -3   12.67    3.19
  -2   7   3   14.72    2.71
   1  -7  -3    2.64    2.49
   1  -7  -3    6.57    1.77
  -1   7   3    2.69    1.98
  -1   7   3    5.53    2.28
   0  -7  -3   58.55    3.74
   0   7   3   57.30    4.64
   0   7   3   54.26    4.15
   1   7   3   -1.38    2.00
   1   7   3   -0.51    1.69
   2   7   3   34.12    3.55
   3   7   3    1.10    2.19
   4   7   3    1.10    2.26
   1   8   3   22.72    3.38
   2   8   3   -0.97    2.36
   1   7  -4   31.54    3.46
   0   7  -4    6.61    2.39
   0  -7   4   11.75    1.74
   1  -7   4    1.65    2.46
   1  -7   4    2.00    1.64
   2  -7   4   21.43    3.48
   2  -7   4   24.07    2.63
   5   6  -4    1.13    1.92
   4   6  -4   20.84    2.46
   1   6  -4   41.99    2.99
   1   6  -4   42.73    3.63
  -1  -6   4   43.12    2.76
   0   6  -4   10.44    2.10
   0  -6   4    8.11    1.48
  -1   6  -4    1.11    1.77
   1  -6   4    2.13    1.47
   2  -6   4    1.99    2.26
   2  -6   4    2.49    1.76
   3  -6   4    1.17    2.48
   3  -6   4    0.08    1.96
   6   5  -4    6.58    2.29
  -6  -5   4    9.27    1.70
   5   5  -4    8.20    2.13
  -5  -5   4   10.13    1.56
   4   5  -4    0.86    1.73
  -4  -5   4    0.49    1.19
   3   5  -4   74.88    4.27
  -3  -5   4   63.22    4.00
   2   5  -4   72.00    4.28
  -2  -5   4   78.78    4.21
   1   5  -4    0.62    1.48
  -1  -5   4    1.69    1.01
   0   5  -4   40.87    2.83
   0   5  -4   43.71    3.37
   0  -5   4   44.96    2.75
  -1   5  -4   10.02    1.74
   1  -5   4   11.28    1.55
  -2   5  -4   21.26    2.26
   2  -5   4   21.98    2.19
   3  -5   4   14.62    2.25
   3  -5   4   17.83    2.67
   4  -5   4    1.52    2.06
   4  -5   4    2.92    2.37
   5  -5   4   24.81    3.16
  -6  -4   4   13.98    1.89
   5   4  -4   75.50    5.10
  -5  -4   4   80.03    4.49
   4   4  -4   -1.46    1.58
  -4  -4   4    0.36    1.10
   3   4  -4   49.13    3.40
  -3  -4   4   46.17    3.04
   2   4  -4   36.64    2.38
  -2  -4   4   40.18    2.64
   1   4  -4    3.39    1.35
  -1  -4   4    3.23    0.91
   0   4  -4    0.29    1.02
   0   4  -4   -0.20    1.16
   0  -4   4   -0.26    0.88
  -1   4  -4    0.11    1.07
  -1   4  -4    0.21    0.96
   1  -4   4    0.01    0.97
   1  -4   4    0.36    1.05
   1  -4   4    1.36    1.11
  -2   4  -4  138.81    8.12
   2  -4   4  140.24    7.39
   3  -4   4   -0.58    1.42
   4  -4   4   86.05    6.05
   4  -4   4   83.92    5.28
   5  -4   4    4.08    2.47
   5  -4   4   -0.29    2.11
  -6  -3   4    2.95    1.57
   5   3  -4   90.21    5.55
  -5  -3   4   85.68    4.96
   4   3  -4  105.44    6.52
  -4  -3   4  117.77    5.96
   3   3  -4   31.19    2.61
  -3  -3   4   27.02    2.26
   2   3  -4   72.33    4.17
  -2  -3   4   72.71    4.16
  -1  -3   4   65.44    3.92
  -1  -3   4   73.80    3.72
   0   3  -4  133.09    6.86
   0   3  -4  143.23    7.73
   0   3  -4  132.79    7.30
   0  -3   4  134.85    7.21
   0  -3   4  138.16    6.83
   0  -3   4  115.13    7.28
   0  -3   4  136.96    6.76
  -1   3  -4   12.74    1.09
  -1   3  -4   10.91    1.30
  -1   3  -4   12.86    1.29
  -1   3  -4   10.51    1.05
   1  -3   4   10.55    1.20
   1  -3   4   12.86    1.42
   1  -3   4   11.24    1.36
  -2   3  -4    3.39    0.93
  -2   3  -4    2.39    0.91
  -2   3  -4    3.79    1.03
  -2   3  -4    3.83    0.97
   2  -3   4    3.64    1.07
   2  -3   4    3.88    1.11
   2  -3   4    2.31    1.20
  -3   3  -4   48.05    2.92
  -3   3  -4   45.55    3.07
  -3   3  -4   46.53    3.08
  -3   3  -4   44.79    2.89
   3  -3   4   46.99    3.22
  -4   3  -4   16.12    1.99
  -4   3  -4   18.33    1.88
   4  -3   4   17.89    2.18
   4  -3   4   17.91    2.33
  -5   3  -4   91.33    5.35
   5  -3   4   91.57    6.29
   5  -3   4   92.58    5.64
   6  -3   4    9.20    2.54
   6  -3   4    5.87    2.33
  -7  -2   4   29.78    2.90
  -6  -2   4    0.99    1.50
   5   2  -4   30.73    2.76
  -5  -2   4   26.11    2.35
   4   2  -4   95.17    5.39
   4   2  -4   89.64    5.86
  -4  -2   4   86.99    4.88
  -4  -2   4   86.86    5.13
   3   2  -4   -0.59    1.38
   3   2  -4    0.60    1.63
  -3  -2   4    1.33    0.96
  -3  -2   4    1.43    1.24
  -3  -2   4    1.45    0.77
   2   2  -4   15.17    1.14
   2   2  -4   16.92    1.72
   2   2  -4   17.26    1.73
  -2  -2   4   13.91    1.17
  -2  -2   4   12.35    1.38
  -2  -2   4   14.21    1.41
  -2  -2   4   14.61    1.42
   1   2  -4    0.18    0.44
   1   2  -4    0.80    0.64
  -1  -2   4    0.47    0.42
  -1  -2   4   -0.02    0.64
  -1  -2   4   -0.71    0.76
  -1  -2   4    1.06    0.68
   0   2  -4  368.10   19.07
   0   2  -4  396.38   21.51
   0  -2   4  377.89   20.43
   0  -2   4  406.60   19.32
   0  -2   4  400.02   19.05
   0  -2   4  393.87   20.36
  -1   2  -4   30.61    1.88
  -1   2  -4   33.27    2.07
  -1   2  -4   29.92    2.00
  -1   2  -4   30.31    2.14
  -1   2  -4   30.61    1.90
  -1   2  -4   30.16    1.83
   1  -2   4   31.96    2.17
   1  -2   4   28.16    1.95
   1  -2   4   35.13    2.16
  -2   2  -4  315.26   15.01
  -2   2  -4  294.83   16.54
  -2   2  -4  310.56   15.83
  -2   2  -4  305.44   15.77
  -2   2  -4  296.28   14.76
   2  -2   4  291.90   15.79
   2  -2   4  282.87   14.83
   2  -2   4  303.12   15.93
  -3   2  -4    0.25    1.27
  -3   2  -4    1.75    1.04
  -3   2  -4   -0.10    1.00
  -3   2  -4    1.08    1.05
  -3   2  -4    0.03    0.72
   3  -2   4    0.21    1.11
   3  -2   4    1.67    1.10
   3  -2   4    1.01    0.99
  -4   2  -4   12.94    1.68
  -4   2  -4   13.26    1.68
   4  -2   4   12.99    1.79
   4  -2   4   13.67    1.94
  -5   2  -4    1.67    1.55
  -5   2  -4    1.71    1.50
   5  -2   4    1.92    1.68
   5  -2   4    0.84    1.60
  -6   2  -4   19.55    2.46
   6  -2   4   18.20    2.53
   6  -2   4   17.20    2.63
  -7  -1   4   33.62    3.19
  -6  -1   4   42.28    3.21
   5   1  -4   38.63    3.87
  -5  -1   4   38.79    2.83
   4   1  -4   66.27    3.83
   4   1  -4   59.22    4.71
   4   1  -4   67.34    4.10
  -4  -1   4   65.18    3.66
  -4  -1   4   64.09    3.78
   3   1  -4  105.66    5.76
   3   1  -4  101.39    5.31
   3   1  -4   88.64    6.27
  -3  -1   4  108.41    5.41
  -3  -1   4  102.73    5.59
  -3  -1   4   94.52    5.74
  -3  -1   4  102.14    5.33
   2   1  -4   89.57    5.89
   2   1  -4  109.04    5.40
   2   1  -4  108.85    6.40
  -2  -1   4  109.91    5.71
  -2  -1   4  112.84    5.52
  -2  -1   4  104.31    5.92
   1   1  -4   26.37    2.54
   1   1  -4   34.74    1.92
   1   1  -4   36.41    2.05
   1   1  -4   33.50    2.02
   1   1  -4   32.45    2.33
  -1  -1   4   37.75    2.12
  -1  -1   4   32.74    1.96
  -1  -1   4   33.41    2.18
  -1  -1   4   32.77    2.26
   0   1  -4  156.98    8.14
   0   1  -4  128.74    8.09
   0   1  -4  148.43    7.80
   0   1  -4  148.25    7.69
   0   1  -4  159.68    8.10
   0  -1   4  165.24    8.18
   0  -1   4  166.13    7.79
   0  -1   4  156.73    8.26
   0  -1   4  156.62    7.61
  -1   1  -4  104.91    5.56
  -1   1  -4  102.92    5.54
  -1   1  -4   97.70    5.10
  -1   1  -4   98.17    5.19
   1  -1   4   98.15    5.15
   1  -1   4  101.40    5.57
   1  -1   4  105.56    5.49
   1  -1   4  105.25    5.55
  -2   1  -4   68.99    3.81
  -2   1  -4   66.82    3.95
  -2   1  -4   68.88    3.95
  -2   1  -4   67.30    3.62
  -2   1  -4   65.73    3.67
   2  -1   4   67.32    3.97
   2  -1   4   67.26    3.65
   2  -1   4   67.46    3.80
  -3   1  -4  390.62   20.71
  -3   1  -4  381.74   20.73
  -3   1  -4  393.67   19.63
  -3   1  -4  391.14   19.36
   3  -1   4  400.77   20.58
   3  -1   4  414.19   19.41
   3  -1   4  392.29   20.74
   3  -1   4  384.19   20.60
  -4   1  -4   -1.40    1.06
  -4   1  -4    1.08    1.17
   4  -1   4   -0.72    1.12
   4  -1   4    0.81    1.17
   4  -1   4   -0.41    0.98
   4  -1   4    0.91    1.26
  -5   1  -4    7.15    1.67
  -5   1  -4    9.90    1.71
   5  -1   4    8.76    1.68
   5  -1   4    8.83    1.66
  -6   1  -4    6.21    1.84
  -6   1  -4    8.22    1.95
   6  -1   4    5.05    1.92
  -7   1  -4    4.33    2.17
  -7   1  -4    3.94    2.06
  -7   0   4    8.25    2.14
   6   0  -4   48.74    4.56
  -6   0   4   47.99    3.52
   5   0  -4    1.36    1.47
   5   0  -4    0.28    1.81
  -5   0   4   -0.22    1.21
   4   0  -4   18.66    2.22
   4   0  -4   20.05    2.02
   4   0  -4   18.33    1.97
   4   0  -4   20.78    1.91
  -4   0   4   18.79    1.74
  -4   0   4   19.85    1.81
   3   0  -4    4.05    1.05
   3   0  -4    2.75    1.22
   3   0  -4    2.54    1.05
   3   0  -4    4.73    1.33
   3   0  -4    4.85    1.12
  -3   0   4    4.90    1.06
  -3   0   4    3.83    0.96
  -3   0   4    4.02    0.87
  -3   0   4    5.12    0.93
   2   0  -4  158.20    8.87
   2   0  -4  157.15    9.32
   2   0  -4  161.55    8.24
   2   0  -4  165.74    8.80
   2   0  -4  167.84    8.78
  -2   0   4  170.28    8.41
  -2   0   4  170.04    8.80
  -2   0   4  162.86    8.71
  -2   0   4  164.93    8.24
   1   0  -4   12.37    1.37
   1   0  -4   14.55    1.14
   1   0  -4   13.52    1.38
   1   0  -4   16.64    1.17
   1   0  -4   12.89    1.21
  -1   0   4   12.36    1.30
  -1   0   4   13.39    1.28
  -1   0   4   14.01    1.04
   0   0  -4  434.17   20.27
   0   0  -4  351.32   21.36
   0   0  -4  374.88   19.25
   0   0  -4  396.59   18.98
   0   0  -4  420.96   20.27
   0   0   4  386.56   19.01
   0   0   4  349.04   20.20
   0   0   4  395.14   20.32
  -1   0  -4    3.84    0.52
  -1   0  -4    3.72    0.74
  -1   0  -4    4.18    0.85
  -1   0  -4    3.61    0.62
  -1   0  -4    3.22    0.57
   1   0   4    3.17    0.72
   1   0   4    3.83    0.56
   1   0   4    4.47    0.65
   1   0   4    3.43    0.60
  -2   0  -4   18.28    1.44
  -2   0  -4   15.30    1.59
  -2   0  -4   18.85    1.49
  -2   0  -4   17.23    1.34
   2   0   4   19.30    1.39
   2   0   4   17.05    1.54
   2   0   4   15.98    1.34
   2   0   4   20.07    1.37
  -3   0  -4    1.53    1.09
  -3   0  -4    3.35    0.99
  -3   0  -4    2.47    0.87
  -3   0  -4    2.21    0.87
   3   0   4    1.90    0.98
   3   0   4    2.62    0.78
   3   0   4    2.44    0.80
   3   0   4    2.36    0.81
  -4   0  -4   64.48    4.25
  -4   0  -4   65.43    3.89
  -4   0  -4   69.62    3.96
   4   0   4   65.04    4.03
   4   0   4   68.93    4.12
   4   0   4   66.95    3.88
   4   0   4   68.52    4.30
   4   0   4   66.72    3.83
  -5   0  -4   22.07    2.11
  -5   0  -4   20.71    2.03
   5   0   4   23.46    2.14
   5   0   4   17.34    1.86
   5   0   4   19.94    2.21
   5   0   4   19.08    1.98
  -6   0  -4   -0.44    1.59
  -6   0  -4    1.20    1.51
  -7   0  -4   68.33    4.69
  -7   0  -4   68.43    4.58
   6  -1  -4   39.08    4.06
  -6   1   4   34.44    3.06
   5  -1  -4   36.49    3.56
   5  -1  -4   32.56    3.17
  -5   1   4   33.63    2.70
   4  -1  -4   11.22    1.58
   4  -1  -4   12.31    1.94
   4  -1  -4   14.02    1.85
   4  -1  -4   10.49    1.78
  -4   1   4   15.15    1.49
  -4   1   4   12.61    1.49
   3  -1  -4    0.79    1.27
   3  -1  -4    0.41    0.99
   3  -1  -4    1.72    1.05
   3  -1  -4   -0.05    0.94
  -3   1   4    0.83    0.77
  -3   1   4    1.19    0.93
  -3   1   4    0.34    0.92
  -3   1   4    0.04    0.83
   2  -1  -4  179.19   11.23
   2  -1  -4  207.31   11.96
   2  -1  -4  210.00   10.64
   2  -1  -4  223.68   11.28
   2  -1  -4  223.21   11.35
  -2   1   4  213.85   10.81
  -2   1   4  226.77   11.29
  -2   1   4  215.88   10.60
  -2   1   4  217.62   11.23
   1  -1  -4  362.68   17.14
   1  -1  -4  366.52   18.31
   1  -1  -4  358.65   18.24
   1  -1  -4  333.68   19.30
   1  -1  -4  344.66   18.27
  -1   1   4  371.16   18.27
  -1   1   4  359.87   18.27
  -1   1   4  326.05   17.52
  -1   1   4  342.18   17.11
  -1   1   4  339.64   18.22
   0  -1  -4   31.89    1.95
   0  -1  -4   30.06    1.94
   0  -1  -4   32.07    2.19
   0  -1  -4   31.51    2.10
   0  -1  -4   30.24    2.04
   0   1   4   32.67    2.02
   0   1   4   35.39    1.88
   0   1   4   32.33    1.95
   0   1   4   32.15    1.93
   0   1   4   33.76    1.86
  -1  -1  -4  974.63   45.77
  -1  -1  -4  905.35   50.85
  -1  -1  -4  982.51   45.14
  -1  -1  -4  903.93   48.30
  -1  -1  -4 1000.00   48.23
   1   1   4  851.16   48.18
   1   1   4  975.33   48.12
   1   1   4  851.50   45.21
   1   1   4  947.15   50.96
  -2  -1  -4   41.03    2.44
  -2  -1  -4   33.73    2.08
  -2  -1  -4   35.92    2.14
  -2  -1  -4   35.64    2.05
   2   1   4   34.39    2.19
   2   1   4   36.14    2.12
   2   1   4   34.30    1.97
  -3  -1  -4   34.21    2.16
  -3  -1  -4   31.03    2.07
  -3  -1  -4   34.68    2.41
  -3  -1  -4   30.22    2.10
   3   1   4   34.35    2.15
   3   1   4   30.75    1.98
  -4  -1  -4   19.43    1.97
  -4  -1  -4   20.28    1.66
  -4  -1  -4   18.43    1.76
  -4  -1  -4   19.85    1.81
   4   1   4   17.57    1.79
   4   1   4   19.06    1.67
   4   1   4   14.46    1.69
  -5  -1  -4    2.53    1.26
  -5  -1  -4    3.89    1.29
   5   1   4    2.15    1.30
  -6  -1  -4   46.65    3.34
  -6  -1  -4   47.77    3.47
  -7  -1  -4    1.45    1.84
  -7  -1  -4    0.63    1.72
   6  -2  -4    8.15    2.62
   6  -2  -4    9.16    2.68
  -6   2   4    8.57    1.97
   5  -2  -4    2.93    2.09
   5  -2  -4    3.91    2.03
  -5   2   4    2.89    1.43
  -5   2   4    2.10    1.38
   4  -2  -4   44.92    3.36
   4  -2  -4   42.05    3.63
  -4   2   4   41.23    2.93
  -4   2   4   41.60    2.84
   3  -2  -4    4.15    1.31
   3  -2  -4    4.00    1.56
  -3   2   4    4.02    0.89
  -3   2   4    5.74    1.11
  -3   2   4    5.10    1.12
  -3   2   4    4.53    1.15
   2  -2  -4  151.43    8.86
   2  -2  -4  152.53    8.31
   2  -2  -4  146.06    7.79
  -2   2   4  156.41    8.15
  -2   2   4  159.57    8.18
  -2   2   4  156.69    7.72
  -2   2   4  150.30    7.94
  -2   2   4  144.80    8.18
   1  -2  -4   42.30    2.96
   1  -2  -4   41.25    2.42
   1  -2  -4   41.75    2.53
   1  -2  -4   42.63    2.61
  -1   2   4   44.48    2.66
  -1   2   4   39.45    2.54
  -1   2   4   45.98    2.38
  -1   2   4   42.05    2.41
  -1   2   4   40.29    2.52
   0  -2  -4    4.73    0.86
   0  -2  -4    5.12    0.87
   0  -2  -4    4.97    0.88
   0  -2  -4    5.50    0.81
   0  -2  -4    4.67    0.60
   0   2   4    4.73    0.54
   0   2   4    4.07    0.72
   0   2   4    6.12    0.97
   0   2   4    4.89    0.64
  -1  -2  -4    4.17    0.80
  -1  -2  -4    4.87    0.54
  -1  -2  -4    4.75    0.74
  -1  -2  -4    4.61    0.62
   1   2   4    4.17    0.63
   1   2   4    3.64    0.51
   1   2   4    3.55    0.72
   1   2   4    3.47    0.52
  -2  -2  -4  135.39    6.65
  -2  -2  -4  140.48    6.56
   2   2   4  128.92    6.93
   2   2   4  135.55    7.49
   2   2   4  130.85    6.67
   2   2   4  120.27    7.07
  -3  -2  -4   37.35    2.51
  -3  -2  -4   33.85    2.13
  -3  -2  -4   33.41    2.16
  -3  -2  -4   36.83    2.15
   3   2   4   33.82    2.22
  -4  -2  -4   15.32    1.41
  -4  -2  -4   14.28    1.74
  -4  -2  -4   12.47    1.37
  -4  -2  -4   14.23    1.39
   4   2   4   15.11    1.48
  -5  -2  -4  148.60    7.94
  -5  -2  -4  147.07    7.83
   5   2   4  157.96    8.40
  -6  -2  -4   28.43    2.50
  -6  -2  -4   27.48    2.51
  -7  -2  -4    4.34    1.78
  -7  -2  -4    6.26    1.80
   6  -3  -4    7.98    2.68
   6  -3  -4    1.84    2.74
   5  -3  -4    6.91    2.50
   5  -3  -4    7.24    2.45
  -5   3   4    6.44    1.73
   4  -3  -4   44.73    4.10
   4  -3  -4   50.46    3.79
  -4   3   4   47.35    3.41
  -4   3   4   47.74    3.15
  -4   3   4   52.01    3.37
   3  -3  -4  115.85    6.12
   3  -3  -4   97.67    6.73
  -3   3   4  104.96    6.00
  -3   3   4  109.02    6.02
  -3   3   4  108.82    6.07
  -3   3   4  112.87    5.78
   2  -3  -4   15.24    1.92
   2  -3  -4   14.22    1.59
   2  -3  -4   16.56    1.65
   2  -3  -4   16.81    1.77
  -2   3   4   16.13    1.46
  -2   3   4   17.67    1.64
   1  -3  -4  380.17   19.14
   1  -3  -4  374.60   20.27
   1  -3  -4  374.22   17.95
   1  -3  -4  348.47   19.05
  -1   3   4  358.56   17.81
  -1   3   4  382.85   20.36
  -1   3   4  371.39   19.04
  -1   3   4  327.56   18.36
   0  -3  -4    3.89    1.02
   0  -3  -4    3.89    0.90
   0  -3  -4    2.93    0.58
   0  -3  -4    4.57    0.76
   0   3   4    3.39    0.95
   0   3   4    3.46    0.67
   0   3   4    2.37    0.81
  -1  -3  -4  185.77    9.34
  -1  -3  -4  197.11   10.49
  -1  -3  -4  190.80    9.51
   1   3   4  185.92    9.61
   1   3   4  182.58   10.64
  -2  -3  -4   33.19    1.93
   2   3   4   35.34    2.09
   2   3   4   33.60    2.47
  -3  -3  -4    9.50    0.99
  -3  -3  -4    9.77    0.97
   3   3   4   10.65    1.42
  -4  -3  -4   90.49    5.06
  -4  -3  -4   98.10    5.02
   4   3   4   98.62    5.35
  -5  -3  -4    5.04    1.25
  -5  -3  -4    4.76    1.19
   5   3   4    4.25    1.30
  -6  -3  -4  132.43    7.03
  -6  -3  -4  128.05    7.10
   6   3   4  134.26    7.58
  -7  -3  -4    5.64    1.76
   5  -4  -4    5.18    2.64
   5  -4  -4    6.55    2.67
  -5   4   4    3.48    1.91
   4  -4  -4   37.13    3.99
   4  -4  -4   34.25    3.45
  -4   4   4   41.48    3.23
   3  -4  -4   31.70    3.09
   3  -4  -4   33.44    2.94
  -3   4   4   29.57    2.70
  -3   4   4   32.27    3.13
   2  -4  -4    0.38    1.21
   2  -4  -4    2.86    1.61
  -2   4   4    3.37    1.54
  -2   4   4    5.17    1.33
   1  -4  -4   22.75    1.79
   1  -4  -4   24.90    2.56
   1  -4  -4   22.30    1.93
   1  -4  -4   22.11    1.87
  -1   4   4   23.09    2.32
  -1   4   4   22.22    2.10
  -1   4   4   23.86    1.88
   0  -4  -4   69.04    4.28
   0   4   4   59.79    3.84
   0   4   4   65.81    3.71
   0   4   4   66.71    4.28
  -1  -4  -4   39.42    2.29
  -1  -4  -4   34.97    2.67
   1   4   4   37.11    2.51
   1   4   4   34.75    2.81
   2   4   4   60.24    4.12
   2   4   4   66.39    3.63
   3   4   4  137.30    8.11
  -4  -4  -4   15.17    1.30
  -4  -4  -4   15.10    1.29
   4   4   4   12.84    1.29
  -5  -4  -4    7.43    1.28
  -5  -4  -4    9.35    1.35
   5   4   4    6.73    1.39
  -6  -4  -4   -1.77    1.21
  -6  -4  -4   -0.10    1.26
   6   4   4    0.67    1.44
  -7  -4  -4   24.92    2.42
   4  -5  -4    7.84    2.59
   4  -5  -4   11.46    2.89
  -4   5   4   10.20    2.13
  -4   5   4    9.75    2.40
   3  -5  -4   58.80    4.26
   3  -5  -4   59.71    4.90
  -3   5   4   53.54    4.08
  -3   5   4   63.46    4.48
   2  -5  -4    4.03    1.94
   2  -5  -4    3.14    1.54
  -2   5   4    4.40    1.52
  -2   5   4    3.00    1.69
   1  -5  -4   81.73    5.37
   1  -5  -4   82.86    4.61
  -1   5   4   77.71    5.28
  -1   5   4   77.25    4.82
   0  -5  -4   10.02    1.68
   0  -5  -4    9.61    1.21
   0   5   4    8.09    1.57
   0   5   4    7.86    1.63
   0   5   4    9.06    1.14
  -1  -5  -4   -0.05    1.14
   1   5   4   -0.11    1.15
   1   5   4    0.61    1.25
   2   5   4   33.20    2.41
   2   5   4   31.14    2.83
   3   5   4    9.62    1.86
   4   5   4  202.11   11.80
  -5  -5  -4    5.08    1.17
  -6  -5  -4   35.27    2.55
   6   5   4   32.07    2.79
   3  -6  -4   16.89    3.24
   3  -6  -4   13.21    2.58
  -3   6   4   13.50    2.68
   2  -6  -4   11.00    2.23
   2  -6  -4   17.92    3.01
  -2   6   4   18.90    2.68
  -2   6   4   16.44    2.35
   1  -6  -4    8.13    1.73
   1  -6  -4    9.27    2.29
  -1   6   4    9.96    2.15
  -1   6   4    8.43    1.89
   0  -6  -4   22.43    2.42
   0  -6  -4   19.31    1.87
   0   6   4   20.71    2.27
   0   6   4   18.81    1.86
   0   6   4   20.02    2.46
   1   6   4   28.65    3.06
   1   6   4   34.12    2.71
   2   6   4   -0.41    1.63
   2   6   4   -0.37    1.32
   3   6   4    8.01    2.09
   4   6   4   -0.10    1.90
   2  -7  -4   -1.05    2.81
   2  -7  -4    0.46    1.97
  -2   7   4   -2.09    2.05
   1  -7  -4    2.48    1.73
   1  -7  -4   -1.04    2.41
  -1   7   4    1.87    2.18
   0  -7  -4    7.74    1.67
   0   7   4    5.72    2.30
   0   7   4    7.19    2.00
   1   7   4    0.08    2.07
   1   7   4    0.48    1.71
   2   7   4   90.34    6.28
   3   7   4    3.83    2.30
   4   7   4   26.21    3.29
   1   8   4    0.82    2.46
   2   8   4   -4.12    2.34
   2   7  -5    9.80    1.75
   0   7  -5    7.84    2.41
   0  -7   5   11.38    1.85
   1  -7   5    0.19    1.65
   2  -7   5    7.99    2.12
   4   6  -5    3.84    2.01
   3   6  -5    1.46    1.69
   2   6  -5    4.81    1.39
  -2  -6   5    1.41    1.54
   1   6  -5  104.49    6.68
   1   6  -5   97.95    6.02
  -1  -6   5  105.92    5.52
   0   6  -5    2.46    1.92
   0  -6   5    7.08    1.48
  -1   6  -5   74.96    5.33
   1  -6   5   79.79    4.61
   2  -6   5    1.93    1.71
   3  -6   5    7.98    2.15
   3  -6   5    7.83    2.78
   5   5  -5    0.87    2.04
  -5  -5   5    3.16    1.48
   4   5  -5   36.33    3.20
  -4  -5   5   36.19    2.84
   3   5  -5   19.25    2.22
  -3  -5   5   18.71    1.93
   2   5  -5    5.23    1.23
  -2  -5   5    4.85    1.46
   1   5  -5    7.57    1.83
  -1  -5   5   10.87    1.33
   0   5  -5   34.04    3.06
   0   5  -5   34.79    2.65
   0  -5   5   39.08    2.55
  -1   5  -5    5.22    1.60
   1  -5   5    5.18    1.37
   2  -5   5   70.56    4.32
   3  -5   5   27.71    2.71
   4  -5   5    6.36    2.56
   4  -5   5    1.74    2.05
  -6  -4   5    4.35    1.69
   5   4  -5   -2.78    1.88
  -5  -4   5   -1.09    1.36
   4   4  -5   -0.34    1.68
  -4  -4   5    1.69    1.31
   3   4  -5  112.45    6.33
  -3  -4   5  102.77    5.81
   2   4  -5   10.68    1.36
  -2  -4   5    9.51    1.57
  -1  -4   5  222.95   11.08
   0   4  -5    2.51    1.29
   0   4  -5    2.32    1.22
   0  -4   5    4.23    1.12
   0  -4   5    2.67    1.01
  -1   4  -5   24.08    2.04
  -1   4  -5   21.78    2.20
   1  -4   5   23.09    1.97
   1  -4   5   24.68    2.20
  -2   4  -5    5.05    1.24
   2  -4   5    3.03    1.28
   3  -4   5    4.87    1.60
   4  -4   5   63.98    5.01
   4  -4   5   60.18    4.26
   5  -4   5   -0.56    2.09
   5  -4   5    2.65    2.39
   5   3  -5    6.41    2.06
  -5  -3   5    7.48    1.64
   4   3  -5    2.01    1.69
  -4  -3   5    4.23    1.32
   3   3  -5   71.33    4.38
  -3  -3   5   63.87    3.98
   2   3  -5   53.80    3.49
  -2  -3   5   58.57    3.49
  -2  -3   5   53.64    3.40
   1   3  -5   34.29    2.39
  -1  -3   5   29.45    2.54
  -1  -3   5   37.81    2.41
  -1  -3   5   38.23    2.29
  -1  -3   5   35.14    2.18
   0   3  -5  320.93   18.03
   0   3  -5  367.83   19.05
   0   3  -5  351.54   17.08
   0   3  -5  296.29   16.74
   0  -3   5  367.63   16.84
   0  -3   5  322.76   18.08
   0  -3   5  346.70   18.00
   0  -3   5  366.73   17.07
  -1   3  -5   27.91    2.12
  -1   3  -5   28.34    2.19
  -1   3  -5   27.93    2.01
  -1   3  -5   28.86    1.94
   1  -3   5   28.17    2.08
   1  -3   5   30.05    2.34
   1  -3   5   27.52    2.33
  -2   3  -5    7.75    1.11
  -2   3  -5    8.42    1.13
  -2   3  -5    8.67    1.18
   2  -3   5    6.90    1.26
   2  -3   5    7.97    1.25
  -3   3  -5   29.54    2.22
  -3   3  -5   30.36    2.41
  -3   3  -5   32.30    2.32
   3  -3   5   30.14    2.55
  -4   3  -5    0.45    1.23
  -4   3  -5   -0.07    1.44
   4  -3   5    0.73    1.53
  -5   3  -5   15.29    2.07
   5  -3   5   13.00    2.31
   6  -3   5    5.36    2.44
   6  -3   5    7.18    2.36
  -6  -2   5    3.42    1.75
  -5  -2   5   58.16    3.75
   4   2  -5   11.37    2.25
   4   2  -5    4.26    1.67
  -4  -2   5    8.89    1.40
   3   2  -5  168.99   10.86
   3   2  -5  169.20   10.22
  -3  -2   5  212.85   10.33
  -3  -2   5  191.52   10.00
  -3  -2   5  193.07    9.54
   2   2  -5   19.61    2.11
   2   2  -5   19.02    1.43
   2   2  -5   19.48    2.02
  -2  -2   5   19.55    1.47
  -2  -2   5   18.71    1.83
  -2  -2   5   19.37    1.94
  -2  -2   5   22.44    1.74
   1   2  -5   24.35    1.60
   1   2  -5   25.92    1.85
  -1  -2   5   26.48    2.06
  -1  -2   5   24.04    1.91
  -1  -2   5   26.24    1.92
  -1  -2   5   24.84    1.64
   0   2  -5    0.28    0.80
   0   2  -5   -0.33    0.87
   0  -2   5    0.38    0.66
   0  -2   5    0.22    0.78
   0  -2   5   -0.66    0.94
   0  -2   5    1.20    0.64
  -1   2  -5    7.38    0.85
  -1   2  -5    5.70    0.86
  -1   2  -5    6.14    1.12
  -1   2  -5    8.02    1.01
  -1   2  -5    8.32    0.88
  -1   2  -5    5.58    0.87
   1  -2   5    6.83    0.94
   1  -2   5    6.88    1.17
   1  -2   5    5.17    1.03
  -2   2  -5   90.19    4.73
  -2   2  -5   89.18    4.81
  -2   2  -5   89.08    5.10
  -2   2  -5   90.09    5.09
  -2   2  -5   89.45    5.04
   2  -2   5   88.99    5.07
   2  -2   5   89.53    5.20
   2  -2   5   87.31    4.79
  -3   2  -5    3.22    1.37
  -3   2  -5    1.05    1.12
  -3   2  -5    2.02    1.11
  -3   2  -5    2.89    1.09
   3  -2   5    4.06    1.28
   3  -2   5    1.64    1.10
   3  -2   5    0.45    0.75
  -4   2  -5  234.87   12.10
  -4   2  -5  242.44   11.92
   4  -2   5  226.47   11.97
  -5   2  -5   19.38    2.22
  -5   2  -5   20.56    2.26
   5  -2   5   21.10    2.49
   5  -2   5   20.65    2.31
  -6   2  -5    7.48    2.05
   6  -2   5    8.75    2.15
   6  -2   5   10.77    2.33
  -7  -1   5    0.16    1.89
  -6  -1   5    0.96    1.70
   5   1  -5   48.46    4.69
  -5  -1   5   59.30    3.67
   4   1  -5   50.51    4.57
   4   1  -5   62.09    4.01
  -4  -1   5   62.00    3.72
  -4  -1   5   64.09    3.60
   3   1  -5   30.16    2.15
   3   1  -5   26.14    2.73
   3   1  -5   26.96    2.42
  -3  -1   5   24.89    2.36
  -3  -1   5   31.14    2.08
  -3  -1   5   27.54    2.18
  -3  -1   5   26.89    2.31
   2   1  -5  276.90   14.70
   2   1  -5  277.21   12.86
   2   1  -5  222.33   13.65
   2   1  -5  243.22   13.79
  -2  -1   5  261.46   12.95
  -2  -1   5  265.64   13.64
  -2  -1   5  274.61   13.85
   1   1  -5    1.45    1.24
   1   1  -5    1.19    1.10
   1   1  -5    1.17    0.78
   1   1  -5    1.72    0.57
   1   1  -5    1.75    0.68
   1   1  -5    0.82    0.82
  -1  -1   5    1.28    0.55
  -1  -1   5    0.72    0.96
  -1  -1   5    0.22    0.97
   0   1  -5   14.23    1.43
   0   1  -5   13.45    1.25
   0   1  -5   13.65    1.36
   0   1  -5   15.51    1.35
   0   1  -5   15.17    1.31
   0  -1   5   14.95    1.29
   0  -1   5   15.55    1.42
   0  -1   5   16.88    1.62
  -1   1  -5  181.32    9.56
  -1   1  -5  201.37   10.33
  -1   1  -5  197.80   10.25
  -1   1  -5  194.48    9.73
  -1   1  -5  194.83   10.35
   1  -1   5  188.42    9.61
   1  -1   5  198.80   10.36
   1  -1   5  196.76   10.33
  -2   1  -5    1.48    0.77
  -2   1  -5    1.06    0.72
  -2   1  -5    1.12    1.00
  -2   1  -5    1.21    0.98
   2  -1   5    0.65    0.90
   2  -1   5   -0.32    0.69
   2  -1   5    0.72    0.74
   2  -1   5   -0.04    0.29
  -3   1  -5   82.91    4.55
  -3   1  -5   79.06    4.47
  -3   1  -5   78.98    4.83
  -3   1  -5   87.08    4.92
   3  -1   5   78.95    4.68
   3  -1   5   83.91    4.70
   3  -1   5   83.08    4.49
   3  -1   5   80.62    4.91
  -4   1  -5    0.27    1.17
  -4   1  -5    1.66    1.21
   4  -1   5    1.26    1.05
   4  -1   5    1.54    1.29
   4  -1   5    0.98    1.15
  -5   1  -5  122.71    6.78
  -5   1  -5  119.54    6.64
   5  -1   5  119.37    6.60
   5  -1   5  120.99    7.38
  -6   1  -5    2.09    1.81
  -6   1  -5    1.30    1.73
   6  -1   5    1.95    1.72
  -7   1  -5   14.05    2.52
   6   0  -5   -1.97    2.52
  -6   0   5   -0.24    1.66
   5   0  -5   64.97    4.96
  -5   0   5   62.43    4.01
   4   0  -5    5.24    1.54
   4   0  -5    6.65    1.48
   4   0  -5    8.85    1.94
   4   0  -5    8.44    1.55
  -4   0   5    8.37    1.28
  -4   0   5    7.27    1.37
   3   0  -5   -0.41    0.95
   3   0  -5    0.82    1.32
   3   0  -5   -0.13    1.01
   3   0  -5   -0.12    1.09
   3   0  -5   -0.12    1.40
  -3   0   5    1.13    0.97
  -3   0   5   -0.38    1.00
  -3   0   5   -0.02    0.89
  -3   0   5   -0.20    0.72
   2   0  -5    2.57    1.00
   2   0  -5    3.03    1.21
   2   0  -5    1.88    0.83
   2   0  -5    2.52    0.87
   2   0  -5    1.38    1.16
  -2   0   5    2.12    0.67
  -2   0   5    1.10    0.80
  -2   0   5    2.29    0.95
  -2   0   5    1.75    0.97
   1   0  -5   -0.20    1.11
   1   0  -5    0.11    0.68
   1   0  -5    0.62    0.66
   1   0  -5    0.18    0.90
   1   0  -5    0.67    0.87
   1   0  -5    0.62    1.07
  -1   0   5    0.47    0.86
  -1   0   5    1.24    0.58
  -1   0   5    1.32    0.82
   0   0  -5   78.40    4.16
   0   0  -5   70.46    4.81
   0   0  -5   76.81    4.28
   0   0  -5   90.32    4.43
   0   0  -5   81.38    4.51
   0   0   5   81.50    4.57
   0   0   5   81.87    4.31
   0   0   5   70.78    4.41
  -1   0  -5    2.01    0.77
  -1   0  -5    1.58    0.67
  -1   0  -5    1.61    0.59
  -1   0  -5    1.52    0.53
  -1   0  -5    1.32    0.92
   1   0   5    2.64    0.76
   1   0   5    0.96    0.68
   1   0   5    1.80    0.64
   1   0   5    2.12    0.55
  -2   0  -5  398.49   20.36
  -2   0  -5  414.79   21.57
  -2   0  -5  399.67   20.07
  -2   0  -5  394.29   21.38
  -2   0  -5  407.92   21.49
   2   0   5  408.56   20.08
   2   0   5  432.44   21.50
   2   0   5  424.40   21.41
   2   0   5  420.70   21.39
  -3   0  -5   57.68    3.46
  -3   0  -5   56.36    3.80
  -3   0  -5   55.12    3.40
  -3   0  -5   61.65    3.73
   3   0   5   62.32    3.50
   3   0   5   61.83    3.57
   3   0   5   61.19    3.41
   3   0   5   66.19    3.74
  -4   0  -5   19.65    1.75
  -4   0  -5   18.17    2.06
  -4   0  -5   19.31    1.77
   4   0   5   18.87    1.68
   4   0   5   16.06    1.60
   4   0   5   18.40    1.83
   4   0   5   18.98    1.77
  -5   0  -5    5.02    1.50
  -5   0  -5    7.55    1.53
   5   0   5    7.58    1.43
   5   0   5    6.89    1.47
   5   0   5    7.45    1.40
  -6   0  -5   14.98    2.21
  -6   0  -5   16.36    2.18
  -7   0  -5   25.53    2.85
  -7   0  -5   27.08    2.89
   6  -1  -5   46.65    4.57
  -6   1   5   42.82    3.48
   5  -1  -5   12.16    2.40
   5  -1  -5    7.37    2.07
  -5   1   5    9.47    1.69
   4  -1  -5   97.05    6.14
   4  -1  -5   93.75    5.44
  -4   1   5   91.10    5.20
  -4   1   5   90.82    5.18
   3  -1  -5    1.84    1.12
   3  -1  -5    0.08    1.11
   3  -1  -5   -0.51    1.32
   3  -1  -5   -0.99    0.99
  -3   1   5    0.36    0.98
  -3   1   5   -0.30    0.90
  -3   1   5    0.21    0.78
  -3   1   5   -0.13    1.00
   2  -1  -5   48.10    3.09
   2  -1  -5   49.60    3.54
   2  -1  -5   49.52    3.00
   2  -1  -5   50.77    3.14
   2  -1  -5   52.92    3.12
  -2   1   5   55.72    3.12
  -2   1   5   48.35    2.98
  -2   1   5   49.70    2.93
  -2   1   5   48.49    2.95
   1  -1  -5   97.92    6.08
   1  -1  -5  113.93    5.42
   1  -1  -5  101.51    5.71
   1  -1  -5  105.35    5.76
   1  -1  -5  108.00    5.70
  -1   1   5  111.67    5.71
  -1   1   5   99.58    5.66
  -1   1   5  104.41    5.37
  -1   1   5  103.33    5.51
  -1   1   5  101.22    5.72
   0  -1  -5   56.99    2.99
   0  -1  -5   51.33    3.19
   0  -1  -5   57.22    3.13
   0  -1  -5   53.53    3.08
   0  -1  -5   50.15    3.45
   0   1   5   50.97    3.15
   0   1   5   54.13    2.95
   0   1   5   54.21    3.05
   0   1   5   53.67    3.12
  -1  -1  -5  132.95    6.99
  -1  -1  -5  129.11    6.43
  -1  -1  -5  119.02    7.24
  -1  -1  -5  131.08    6.32
  -1  -1  -5  134.64    6.80
   1   1   5  137.74    6.75
   1   1   5  119.81    6.70
   1   1   5  132.84    6.69
   1   1   5  114.47    6.47
   1   1   5  117.45    6.88
   1   1   5  126.61    7.09
  -2  -1  -5   44.19    2.84
  -2  -1  -5   40.27    2.36
  -2  -1  -5   41.22    2.49
  -2  -1  -5   40.13    2.32
   2   1   5   41.39    2.42
   2   1   5   39.14    2.47
   2   1   5   40.68    2.31
  -3  -1  -5  383.99   20.02
  -3  -1  -5  385.85   20.14
  -3  -1  -5  378.03   18.74
  -3  -1  -5  386.59   19.01
   3   1   5  370.18   18.68
   3   1   5  389.22   19.94
  -4  -1  -5    5.46    1.13
  -4  -1  -5    3.45    1.21
  -4  -1  -5    4.59    1.10
  -4  -1  -5    2.51    1.44
   4   1   5    4.32    0.94
   4   1   5    4.92    1.12
   4   1   5    4.32    0.96
  -5  -1  -5   54.19    3.52
  -5  -1  -5   56.54    3.51
  -6  -1  -5    3.64    1.60
  -6  -1  -5    4.72    1.64
  -7  -1  -5   23.46    2.67
  -7  -1  -5   21.56    2.57
   6  -2  -5    3.03    2.64
  -6   2   5    4.91    1.87
   5  -2  -5   -1.82    2.00
   5  -2  -5   -1.85    2.04
  -5   2   5    0.46    1.50
  -5   2   5   -0.75    1.33
   4  -2  -5    3.64    1.71
   4  -2  -5    1.52    1.79
  -4   2   5    3.94    1.37
  -4   2   5    0.89    1.19
   3  -2  -5    5.82    1.41
   3  -2  -5    6.04    1.71
  -3   2   5    8.13    1.23
  -3   2   5    6.80    1.04
  -3   2   5    8.17    1.31
  -3   2   5    7.00    1.25
   2  -2  -5  143.38    7.47
   2  -2  -5  146.30    7.94
   2  -2  -5  137.80    8.41
   2  -2  -5  144.51    7.85
  -2   2   5  145.05    7.77
  -2   2   5  135.04    7.55
  -2   2   5  150.30    7.36
  -2   2   5  143.39    7.82
  -2   2   5  148.23    7.78
   1  -2  -5   -0.37    0.79
   1  -2  -5   -0.40    0.97
   1  -2  -5    0.43    0.80
  -1   2   5    0.58    0.87
  -1   2   5   -0.16    0.69
  -1   2   5    0.27    0.55
  -1   2   5   -0.15    0.63
  -1   2   5    0.44    0.59
   0  -2  -5  275.98   14.99
   0  -2  -5  308.61   16.60
   0  -2  -5  294.63   15.77
   0  -2  -5  271.19   14.74
   0   2   5  302.45   15.09
   0   2   5  321.36   15.65
   0   2   5  325.49   14.67
  -1  -2  -5   59.44    3.26
  -1  -2  -5   60.12    3.74
  -1  -2  -5   57.08    3.22
  -1  -2  -5   62.72    3.14
  -1  -2  -5   61.92    3.29
   1   2   5   59.04    3.58
   1   2   5   59.84    3.34
   1   2   5   57.79    3.29
   1   2   5   56.93    3.25
  -2  -2  -5   33.67    1.90
  -2  -2  -5   32.00    1.94
   2   2   5   28.49    2.31
   2   2   5   29.36    1.95
   2   2   5   34.01    2.20
   2   2   5   34.36    1.91
  -3  -2  -5   -0.76    0.76
  -3  -2  -5   -0.66    1.25
  -3  -2  -5    0.54    0.77
  -3  -2  -5    0.74    0.73
   3   2   5   -0.11    0.80
   3   2   5    0.03    0.73
  -4  -2  -5   83.39    4.64
  -4  -2  -5   91.07    5.14
  -4  -2  -5   85.22    4.86
  -4  -2  -5   80.93    4.55
   4   2   5   83.96    4.84
  -5  -2  -5   48.01    3.06
  -5  -2  -5   46.27    3.08
   5   2   5   45.69    3.26
  -6  -2  -5    3.00    1.48
  -6  -2  -5    4.57    1.57
  -7  -2  -5   37.07    3.13
  -7  -2  -5   41.28    3.29
   6  -3  -5   21.35    3.43
   6  -3  -5   24.04    3.65
   5  -3  -5    1.95    2.28
   5  -3  -5    5.53    2.54
  -5   3   5    2.95    1.63
   4  -3  -5   36.35    3.80
   4  -3  -5   42.04    3.58
  -4   3   5   40.20    2.92
  -4   3   5   42.47    3.10
   3  -3  -5    3.74    1.68
   3  -3  -5    3.03    1.50
  -3   3   5    5.41    1.40
  -3   3   5    3.00    1.02
  -3   3   5    3.92    1.12
  -3   3   5    3.54    1.08
   2  -3  -5    0.72    1.02
   2  -3  -5    1.43    1.06
   2  -3  -5   -0.06    1.40
  -2   3   5    0.98    0.80
  -2   3   5    1.25    0.98
  -2   3   5   -0.02    1.01
   1  -3  -5   44.82    2.77
   1  -3  -5   44.44    3.34
   1  -3  -5   40.63    2.86
  -1   3   5   46.15    2.49
  -1   3   5   44.77    2.74
  -1   3   5   40.60    2.81
   0  -3  -5   28.69    1.83
   0  -3  -5   26.52    2.06
   0  -3  -5   33.66    2.15
   0  -3  -5   29.56    2.40
   0  -3  -5   32.49    2.04
   0   3   5   28.62    2.36
   0   3   5   26.09    1.87
   0   3   5   26.08    2.06
  -1  -3  -5  488.84   26.29
  -1  -3  -5  487.41   23.76
  -1  -3  -5  479.23   23.41
   1   3   5  477.29   23.96
   1   3   5  482.04   24.82
   1   3   5  461.48   26.46
  -2  -3  -5    0.90    0.57
  -2  -3  -5    0.31    0.70
  -2  -3  -5    1.51    0.64
   2   3   5    0.72    0.70
   2   3   5    1.71    0.98
  -3  -3  -5  105.80    5.56
  -3  -3  -5  107.12    5.47
   3   3   5  104.57    5.77
   3   3   5  108.39    6.38
   3   3   5  111.43    5.89
  -4  -3  -5    0.29    0.90
  -4  -3  -5    1.35    0.91
   4   3   5    1.24    0.92
  -5  -3  -5   19.08    1.74
  -5  -3  -5   16.37    1.71
   5   3   5   18.78    1.87
  -6  -3  -5    2.89    1.41
   6   3   5    1.34    1.60
  -7  -3  -5   10.22    1.96
   5  -4  -5    7.26    2.79
   5  -4  -5    2.42    2.66
   4  -4  -5   31.35    3.45
   4  -4  -5   30.02    3.28
  -4   4   5   28.68    2.73
   3  -4  -5   -1.81    1.76
   3  -4  -5    0.38    1.58
  -3   4   5    0.97    1.40
  -3   4   5   -0.43    1.89
   2  -4  -5  112.35    6.80
   2  -4  -5  110.35    5.96
  -2   4   5  101.08    6.67
  -2   4   5  103.70    5.99
   1  -4  -5    5.64    1.57
   1  -4  -5    4.40    1.14
   1  -4  -5    2.55    1.06
   1  -4  -5    2.33    0.95
  -1   4   5    4.34    1.41
  -1   4   5    3.77    1.00
  -1   4   5    5.11    1.24
   0  -4  -5   41.92    2.44
   0  -4  -5   37.52    3.06
   0   4   5   36.67    2.42
   0   4   5   37.68    2.71
   0   4   5   37.91    3.01
  -1  -4  -5    0.55    0.97
  -1  -4  -5   -0.10    1.02
  -1  -4  -5   -1.67    0.83
   1   4   5    1.49    1.11
   1   4   5    0.02    0.96
  -2  -4  -5  109.51    5.60
   2   4   5  104.02    6.46
   2   4   5  108.58    5.74
   3   4   5   27.86    1.79
   3   4   5   21.63    2.35
  -4  -4  -5    1.09    0.92
  -4  -4  -5   -0.09    0.91
   4   4   5    1.87    0.89
   4   4   5    1.15    1.43
  -5  -4  -5   88.96    4.88
  -5  -4  -5   89.17    4.82
   5   4   5   87.39    5.13
  -6  -4  -5    7.96    1.60
  -6  -4  -5    9.94    1.62
   6   4   5   10.41    1.80
  -7  -4  -5   14.19    1.97
   4  -5  -5    7.12    2.82
   4  -5  -5    3.98    2.59
  -4   5   5    3.47    2.26
   3  -5  -5   14.85    2.83
   3  -5  -5   12.68    2.40
  -3   5   5   14.44    2.14
  -3   5   5   14.74    2.51
   2  -5  -5   11.99    2.29
   2  -5  -5    6.27    1.74
  -2   5   5    6.59    1.91
  -2   5   5    9.38    1.76
   1  -5  -5  197.77   10.12
   1  -5  -5  209.70   11.54
  -1   5   5  193.55   11.52
  -1   5   5  186.28   10.43
   0  -5  -5    5.43    1.59
   0  -5  -5    4.26    1.10
   0   5   5    4.61    1.53
   0   5   5    6.26    1.04
   0   5   5    5.02    1.43
  -1  -5  -5   54.15    3.85
   1   5   5   60.13    3.60
   1   5   5   56.94    4.00
   2   5   5   -1.18    1.04
   2   5   5    1.91    1.42
   3   5   5    0.38    1.51
   4   5   5    7.01    1.87
  -5  -5  -5    5.11    1.19
   5   5   5    5.55    1.31
  -6  -5  -5   55.56    3.25
  -6  -5  -5   48.29    3.26
   6   5   5   49.84    3.57
   3  -6  -5    1.40    2.81
   3  -6  -5    0.28    2.21
  -3   6   5    2.12    2.22
   2  -6  -5    0.69    2.50
   2  -6  -5    2.39    1.87
  -2   6   5    1.78    1.79
  -2   6   5    5.44    2.20
   1  -6  -5    0.20    1.44
   1  -6  -5    1.53    2.05
  -1   6   5   -0.01    1.60
  -1   6   5    0.44    1.84
   0  -6  -5   29.67    2.77
   0  -6  -5   28.18    2.29
   0   6   5   29.92    2.71
   0   6   5   25.65    2.87
   0   6   5   24.32    2.15
   1   6   5    5.80    1.58
   1   6   5    1.07    1.64
   2   6   5    4.24    1.88
   2   6   5    3.11    1.39
   3   6   5   69.31    4.95
   4   6   5   11.52    2.31
   2  -7  -5    4.85    2.98
   2  -7  -5    1.60    2.08
  -2   7   5    3.21    2.44
   1  -7  -5   29.40    3.41
   1  -7  -5   20.42    2.52
  -1   7   5   26.88    3.32
   0  -7  -5   -0.42    1.44
   0   7   5    0.03    2.12
   0   7   5    2.48    1.85
   1   7   5    0.91    1.69
   1   7   5    0.69    1.02
   1   7   5   -1.55    2.07
   2   7   5   15.83    2.79
   3   7   5   -0.31    2.17
   4   7   5   36.32    3.80
   1   8   5   16.20    3.19
   2   8   5    3.51    2.71
   2   7  -6    0.86    1.63
  -1  -7   6    7.12    1.78
   0  -7   6   27.10    2.62
   1  -7   6   -1.85    1.71
   4   6  -6   35.48    3.33
   3   6  -6    1.66    1.97
  -3  -6   6    2.90    1.60
   2   6  -6    3.99    1.54
  -2  -6   6    4.14    1.81
  -1  -6   6    2.70    1.43
   0   6  -6   -3.39    1.68
   0  -6   6    0.64    1.46
   1  -6   6   50.95    3.48
   2  -6   6   -0.06    1.77
   3  -6   6   46.13    3.80
   3  -6   6   48.43    4.66
   5   5  -6    2.99    2.21
  -5  -5   6    9.51    1.83
   4   5  -6   -1.49    1.84
  -4  -5   6   -2.48    1.50
   3   5  -6   28.12    2.88
  -3  -5   6   35.61    2.71
   2   5  -6   48.21    3.21
  -2  -5   6   45.02    3.32
   1   5  -6   -0.91    1.64
  -1  -5   6    1.88    1.21
   0   5  -6   41.88    3.39
   0  -5   6   44.04    2.89
  -1   5  -6    1.90    1.54
   1  -5   6    4.74    1.39
   2  -5   6    7.73    1.66
   3  -5   6   10.47    2.03
   4  -5   6   26.34    2.92
   4  -5   6   24.44    3.36
  -6  -4   6   32.89    3.02
   5   4  -6    3.85    2.23
  -5  -4   6    2.78    1.65
   4   4  -6    3.36    1.85
  -4  -4   6    2.05    1.50
   3   4  -6    1.97    1.73
  -3  -4   6    1.13    1.32
   2   4  -6    2.66    1.37
  -2  -4   6    1.04    1.46
   1   4  -6  147.15    7.99
  -1  -4   6  144.49    7.48
   0   4  -6    4.06    1.37
   0   4  -6    4.35    1.41
   0  -4   6    4.14    1.16
   0  -4   6    6.38    1.24
  -1   4  -6  183.65   10.71
   1  -4   6  188.81    9.56
   1  -4   6  190.79   10.39
   2  -4   6   11.51    1.59
   3  -4   6   13.91    1.90
   4  -4   6    4.46    1.90
   5  -4   6    6.41    2.62
   5  -4   6   11.77    2.45
  -6  -3   6   -2.69    1.75
  -5  -3   6   36.49    3.04
   4   3  -6   14.60    2.27
  -4  -3   6   19.40    1.97
   3   3  -6    0.06    1.61
  -3  -3   6   -2.28    1.27
   2   3  -6  109.80    6.33
  -2  -3   6  114.29    6.03
  -2  -3   6  109.25    6.25
   1   3  -6   10.35    1.32
  -1  -3   6    8.04    1.08
  -1  -3   6    9.51    1.26
  -1  -3   6    8.59    1.32
   0   3  -6   21.18    1.71
   0   3  -6   23.09    1.84
   0   3  -6   20.80    2.13
   0  -3   6   23.05    2.05
   0  -3   6   22.78    1.84
   0  -3   6   20.33    2.06
  -1   3  -6    3.74    1.03
  -1   3  -6    3.60    1.02
  -1   3  -6    2.40    0.98
  -1   3  -6    3.05    1.13
   1  -3   6    4.24    1.41
   1  -3   6    4.96    1.18
   1  -3   6    2.50    1.01
  -2   3  -6   75.08    4.02
   2  -3   6   69.39    4.15
   2  -3   6   75.03    4.48
  -3   3  -6    2.96    1.35
  -3   3  -6    3.83    1.16
  -3   3  -6    5.42    1.24
   3  -3   6    4.70    1.37
  -4   3  -6    8.23    1.60
  -4   3  -6    4.37    1.62
   4  -3   6    7.62    1.77
   5  -3   6   18.50    2.81
   5  -3   6   19.46    2.53
   6  -3   6   24.46    3.05
   6  -3   6   26.68    3.31
  -6  -2   6   -0.45    1.77
   5   2  -6    1.79    2.41
  -5  -2   6    0.76    1.52
   4   2  -6    1.60    2.12
   4   2  -6   -2.51    1.58
  -4  -2   6    0.07    1.25
   3   2  -6  178.92   10.57
   3   2  -6  180.35    9.92
  -3  -2   6  169.06    9.24
  -3  -2   6  188.12    9.65
   2   2  -6   24.21    3.01
   2   2  -6   35.45    2.86
   2   2  -6   37.43    2.21
  -2  -2   6   35.36    2.90
  -2  -2   6   37.71    2.27
  -2  -2   6   35.14    2.61
   1   2  -6  336.86   18.40
   1   2  -6  352.97   18.11
   1   2  -6  401.11   19.43
  -1  -2   6  356.24   19.33
  -1  -2   6  373.39   19.43
  -1  -2   6  426.84   18.62
  -1  -2   6  348.08   18.25
   0   2  -6   64.90    3.63
   0   2  -6   66.83    3.80
   0   2  -6   63.71    3.76
   0  -2   6   63.88    3.57
   0  -2   6   65.90    3.87
   0  -2   6   66.90    4.06
  -1   2  -6   33.27    2.33
  -1   2  -6   32.17    2.11
  -1   2  -6   32.92    2.35
  -1   2  -6   36.14    2.25
  -1   2  -6   32.76    2.24
   1  -2   6   37.33    2.61
   1  -2   6   31.92    2.49
   1  -2   6   32.77    2.24
  -2   2  -6    9.58    1.23
  -2   2  -6    8.34    1.18
  -2   2  -6    8.45    1.35
  -2   2  -6   11.40    1.50
  -2   2  -6    9.03    1.15
   2  -2   6    9.00    1.33
   2  -2   6   11.20    1.45
   2  -2   6   10.37    1.27
  -3   2  -6   18.97    1.90
  -3   2  -6   19.05    2.02
  -3   2  -6   20.97    1.96
  -3   2  -6   19.38    2.03
   3  -2   6   20.07    1.84
  -4   2  -6   44.42    3.14
  -4   2  -6   40.52    2.95
   4  -2   6   43.74    3.10
  -5   2  -6   -0.02    1.53
  -5   2  -6    0.40    1.57
   5  -2   6    0.38    1.70
   5  -2   6   -0.26    1.55
  -6   2  -6   52.41    3.84
   6  -2   6   49.07    3.93
   6  -2   6   51.73    4.39
  -6  -1   6    8.30    2.08
   5   1  -6    7.11    2.50
  -5  -1   6    4.22    1.68
   4   1  -6   27.61    3.16
  -4  -1   6   29.92    2.56
  -4  -1   6   36.86    2.58
   3   1  -6    6.34    2.00
   3   1  -6    4.76    1.56
   3   1  -6    8.55    1.31
  -3  -1   6    5.05    1.30
  -3  -1   6    7.69    1.48
  -3  -1   6    6.30    1.48
  -3  -1   6    9.45    1.13
   2   1  -6   69.31    4.46
   2   1  -6   54.61    3.79
   2   1  -6   68.20    4.05
   2   1  -6   62.79    3.64
  -2  -1   6   67.62    3.65
  -2  -1   6   54.65    3.73
  -2  -1   6   70.08    4.01
   1   1  -6    5.70    0.93
   1   1  -6    4.73    1.32
   1   1  -6    1.40    1.45
   1   1  -6    6.67    1.12
   1   1  -6    6.31    1.09
   1   1  -6    5.66    0.83
  -1  -1   6    7.33    1.24
  -1  -1   6    4.93    0.81
  -1  -1   6    6.40    1.28
   0   1  -6  199.90    9.81
   0   1  -6  169.98    9.38
   0   1  -6  177.44    9.21
   0   1  -6  174.38    9.74
   0   1  -6  191.15    9.85
   0  -1   6  183.73    9.19
   0  -1   6  192.53    9.94
   0  -1   6  181.94    9.82
  -1   1  -6    1.69    0.99
  -1   1  -6    1.23    0.77
  -1   1  -6    1.62    0.73
  -1   1  -6    1.72    0.81
  -1   1  -6    1.67    1.00
  -1   1  -6    1.76    0.70
   1  -1   6    2.07    1.00
   1  -1   6    3.41    0.74
   1  -1   6    2.02    0.91
  -2   1  -6   17.74    1.56
  -2   1  -6   17.68    1.80
  -2   1  -6   17.53    1.62
  -2   1  -6   16.26    1.74
   2  -1   6   16.98    1.74
   2  -1   6   17.54    1.59
   2  -1   6   17.80    1.64
   2  -1   6   16.72    1.50
  -3   1  -6   15.84    1.87
  -3   1  -6   18.14    1.57
  -3   1  -6   16.21    1.93
  -3   1  -6   16.48    1.59
   3  -1   6   16.90    1.56
   3  -1   6   15.25    1.56
   3  -1   6   16.63    1.81
  -4   1  -6   87.15    5.13
  -4   1  -6   94.98    5.08
   4  -1   6   94.02    5.48
   4  -1   6   91.50    5.08
   4  -1   6   85.91    5.22
  -5   1  -6    3.20    1.48
  -5   1  -6    2.70    1.51
   5  -1   6    3.13    1.46
   5  -1   6    2.05    1.50
  -6   1  -6   13.42    2.19
  -6   1  -6   10.79    2.17
   6  -1   6   11.87    2.13
  -7   1  -6   28.79    3.08
   6   0  -6    3.96    2.87
  -6   0   6    0.99    1.80
   5   0  -6   90.39    6.41
  -5   0   6   90.04    5.34
   4   0  -6   10.06    1.78
   4   0  -6   13.43    1.94
   4   0  -6   14.80    2.37
   4   0  -6    9.80    1.71
  -4   0   6   14.34    1.74
  -4   0   6   14.91    1.59
   3   0  -6  249.56   13.58
   3   0  -6  241.51   14.42
   3   0  -6  224.74   13.63
   3   0  -6  257.71   13.56
   3   0  -6  273.88   12.80
  -3   0   6  258.19   13.44
  -3   0   6  260.92   12.74
  -3   0   6  264.23   12.98
  -3   0   6  244.86   13.60
   2   0  -6   62.30    3.40
   2   0  -6   51.07    3.95
   2   0  -6   56.44    3.72
   2   0  -6   49.19    3.48
  -2   0   6   56.35    3.20
  -2   0   6   60.78    3.32
  -2   0   6   53.86    3.42
  -2   0   6   47.34    3.41
   1   0  -6   18.46    1.63
   1   0  -6   20.20    1.58
   1   0  -6   18.62    2.00
   1   0  -6   19.71    1.91
   1   0  -6   19.14    1.82
   1   0  -6   19.74    1.91
  -1   0   6   21.19    1.55
  -1   0   6   20.53    1.78
  -1   0   6   20.14    1.63
   0   0  -6   46.83    2.93
   0   0  -6   48.39    2.74
   0   0  -6   42.70    2.63
   0   0  -6   39.82    3.27
   0   0  -6   42.74    2.91
   0   0  -6   43.76    2.76
   0   0   6   41.59    2.82
   0   0   6   45.22    2.98
  -1   0  -6   88.07    4.74
  -1   0  -6   88.14    4.84
  -1   0  -6   94.43    5.16
  -1   0  -6   98.41    5.17
  -1   0  -6   94.77    5.36
   1   0   6   98.17    5.18
   1   0   6   95.06    5.20
   1   0   6   84.54    4.77
   1   0   6   93.89    5.13
  -2   0  -6  153.15    8.17
  -2   0  -6  159.60    8.70
  -2   0  -6  165.37    8.84
  -2   0  -6  162.84    8.91
  -2   0  -6  164.46    8.32
   2   0   6  169.05    8.72
   2   0   6  162.42    8.70
   2   0   6  170.20    8.81
   2   0   6  163.17    8.17
  -3   0  -6   12.15    1.32
  -3   0  -6    9.83    1.43
  -3   0  -6   11.51    1.26
  -3   0  -6   10.22    1.64
   3   0   6   11.93    1.22
   3   0   6   10.05    1.21
   3   0   6   10.33    1.23
   3   0   6   11.68    1.45
  -4   0  -6  175.70    9.16
  -4   0  -6  171.13    9.00
   4   0   6  180.14    9.60
   4   0   6  181.45    8.99
   4   0   6  171.67    9.44
  -5   0  -6   81.59    4.80
  -5   0  -6   77.55    4.65
   5   0   6   78.85    4.59
   5   0   6   76.61    4.79
   5   0   6   84.23    5.10
  -6   0  -6   21.99    2.50
  -6   0  -6   22.01    2.49
  -7   0  -6   27.24    2.96
  -7   0  -6   26.12    2.88
   6  -1  -6    3.85    2.80
  -6   1   6    4.97    1.96
   5  -1  -6   -0.23    2.25
   5  -1  -6    0.26    1.97
  -5   1   6   -0.70    1.39
   4  -1  -6   41.63    3.82
   4  -1  -6   42.11    3.32
  -4   1   6   42.15    2.98
  -4   1   6   43.94    3.06
   3  -1  -6    4.85    1.32
   3  -1  -6    4.28    1.38
   3  -1  -6    9.33    1.80
   3  -1  -6    7.32    1.42
  -3   1   6    4.74    1.19
  -3   1   6    4.76    0.96
  -3   1   6    7.64    1.28
  -3   1   6    3.67    1.21
   2  -1  -6  352.14   19.47
   2  -1  -6  379.57   19.45
   2  -1  -6  375.08   19.53
   2  -1  -6  351.23   20.59
  -2   1   6  363.89   19.37
  -2   1   6  376.21   18.25
  -2   1   6  392.11   19.47
  -2   1   6  370.28   18.67
   1  -1  -6    5.73    1.03
   1  -1  -6    7.17    1.03
   1  -1  -6    4.34    0.99
   1  -1  -6    6.24    0.98
   1  -1  -6    7.31    1.22
   1  -1  -6    6.67    1.24
  -1   1   6    6.76    0.97
  -1   1   6    6.50    0.96
  -1   1   6    5.56    0.99
  -1   1   6    7.42    1.03
  -1   1   6    7.06    1.14
   0  -1  -6   33.63    2.93
   0  -1  -6   42.86    2.57
   0  -1  -6   43.85    2.45
   0  -1  -6   41.73    2.69
   0  -1  -6   41.00    2.58
   0   1   6   39.15    2.50
   0   1   6   43.05    2.45
   0   1   6   39.57    2.59
   0   1   6   36.45    2.43
   0   1   6   31.99    2.56
  -1  -1  -6    2.67    0.66
  -1  -1  -6    0.95    1.15
  -1  -1  -6    3.22    0.83
  -1  -1  -6    2.22    1.15
  -1  -1  -6    1.60    0.71
   1   1   6    2.96    0.65
   1   1   6    2.80    0.81
   1   1   6    3.46    0.99
   1   1   6    1.24    0.72
   1   1   6    1.97    0.99
   1   1   6    3.02    0.68
  -2  -1  -6  105.41    5.60
  -2  -1  -6  106.42    6.20
  -2  -1  -6  111.02    5.51
  -2  -1  -6  110.33    5.93
   2   1   6  106.85    5.52
   2   1   6  107.50    6.07
   2   1   6  109.61    5.84
   2   1   6  108.81    5.92
   2   1   6  106.13    5.72
  -3  -1  -6    1.32    1.35
  -3  -1  -6    1.81    0.91
  -3  -1  -6    0.97    0.84
  -3  -1  -6    2.63    1.05
   3   1   6    2.94    0.89
   3   1   6    2.97    0.79
  -4  -1  -6   41.68    3.25
  -4  -1  -6   39.12    2.81
  -4  -1  -6   43.97    2.75
   4   1   6   46.64    2.91
   4   1   6   40.05    2.65
  -5  -1  -6  106.32    5.90
  -5  -1  -6  109.43    6.03
  -6  -1  -6    3.05    1.69
  -6  -1  -6    2.66    1.67
  -7  -1  -6    7.83    2.16
  -7  -1  -6    7.88    2.12
   6  -2  -6    0.02    2.74
  -6   2   6   -2.16    1.70
   5  -2  -6   82.08    6.27
   5  -2  -6   91.39    5.85
  -5   2   6   89.38    5.28
  -5   2   6   82.41    5.17
   4  -2  -6    1.78    1.73
   4  -2  -6    0.37    1.86
  -4   2   6    2.51    1.35
  -4   2   6    1.77    1.22
   3  -2  -6   11.08    2.00
   3  -2  -6   10.39    1.72
  -3   2   6   11.05    1.50
  -3   2   6   13.33    1.47
  -3   2   6   12.19    1.33
  -3   2   6   11.02    1.55
   2  -2  -6   10.53    1.42
   2  -2  -6   12.43    1.50
   2  -2  -6    9.36    1.46
   2  -2  -6   12.03    1.76
  -2   2   6   10.95    1.29
  -2   2   6   10.55    1.30
  -2   2   6   13.33    1.31
  -2   2   6   11.34    1.40
   1  -2  -6  119.24    6.30
   1  -2  -6  120.78    6.65
   1  -2  -6  115.97    7.15
  -1   2   6  115.33    6.42
  -1   2   6  125.64    6.52
  -1   2   6  119.93    6.61
  -1   2   6  124.87    6.68
  -1   2   6  126.96    6.22
   0  -2  -6  145.05    7.65
   0  -2  -6  135.55    7.79
   0  -2  -6  163.01    8.08
   0  -2  -6  148.68    8.61
   0  -2  -6  147.95    8.16
   0   2   6  157.08    8.06
   0   2   6  151.38    7.82
   0   2   6  157.82    7.54
  -1  -2  -6    1.13    0.73
  -1  -2  -6    1.67    0.72
  -1  -2  -6    1.10    0.79
  -1  -2  -6    1.47    0.74
  -1  -2  -6    0.93    1.15
   1   2   6    1.05    0.83
   1   2   6    0.53    0.74
   1   2   6    1.24    0.58
   1   2   6    1.95    0.75
  -2  -2  -6  494.33   25.32
  -2  -2  -6  473.67   23.87
  -2  -2  -6  507.85   23.55
   2   2   6  499.04   25.08
   2   2   6  435.57   25.20
   2   2   6  478.16   26.58
   2   2   6  494.93   24.09
  -3  -2  -6  159.37    8.90
  -3  -2  -6  168.88    8.36
  -3  -2  -6  164.46    8.48
  -3  -2  -6  177.45    9.25
   3   2   6  164.46    8.86
   3   2   6  165.71    9.41
  -4  -2  -6   61.06    3.61
  -4  -2  -6   53.12    3.36
  -4  -2  -6   57.97    3.90
  -4  -2  -6   56.25    3.43
   4   2   6   61.01    3.57
  -5  -2  -6   64.61    3.93
  -5  -2  -6   64.16    3.89
   5   2   6   66.16    4.13
  -6  -2  -6   27.13    2.52
  -6  -2  -6   26.82    2.59
  -7  -2  -6    4.78    1.98
  -7  -2  -6   10.10    2.07
   5  -3  -6    0.63    2.35
   5  -3  -6    3.29    2.56
  -5   3   6    2.81    1.77
   4  -3  -6  141.49    7.86
   4  -3  -6  127.97    8.52
  -4   3   6  134.51    7.28
  -4   3   6  137.57    7.54
   3  -3  -6   -0.03    1.69
   3  -3  -6    0.89    1.49
  -3   3   6    2.20    1.37
  -3   3   6    1.69    1.12
  -3   3   6    0.88    1.04
  -3   3   6    1.35    1.06
   2  -3  -6   40.36    3.42
   2  -3  -6   39.14    2.82
  -2   3   6   37.59    2.78
  -2   3   6   39.68    2.50
   1  -3  -6    9.35    1.66
   1  -3  -6    6.26    1.29
   1  -3  -6   14.90    1.43
  -1   3   6    9.22    1.19
  -1   3   6    9.35    1.00
  -1   3   6    9.08    1.32
   0  -3  -6    3.13    1.17
   0  -3  -6    2.35    1.04
   0  -3  -6    2.94    1.20
   0  -3  -6    3.71    0.84
   0  -3  -6    2.06    1.00
   0   3   6    4.08    0.84
   0   3   6    2.70    0.57
   0   3   6    3.32    1.22
   0   3   6    3.50    1.02
  -1  -3  -6   46.00    2.73
  -1  -3  -6   41.79    2.84
  -1  -3  -6   46.12    3.01
   1   3   6   42.86    2.64
   1   3   6   41.69    2.70
   1   3   6   43.97    3.03
  -2  -3  -6   30.74    1.85
  -2  -3  -6   30.42    1.94
   2   3   6   29.84    2.03
   2   3   6   28.37    2.35
   2   3   6   30.32    2.31
   2   3   6   28.32    1.89
  -3  -3  -6  234.99   11.89
  -3  -3  -6  249.60   11.73
   3   3   6  241.86   12.57
   3   3   6  239.68   13.37
   3   3   6  226.11   12.44
   3   3   6  231.77   11.91
  -4  -3  -6    8.90    1.24
  -4  -3  -6   10.24    1.23
   4   3   6    8.31    1.23
  -5  -3  -6   32.11    2.47
  -5  -3  -6   33.12    2.42
   5   3   6   34.02    2.63
  -6  -3  -6   -0.01    1.49
  -6  -3  -6    1.06    1.44
   6   3   6    0.34    1.58
  -7  -3  -6   16.62    2.23
   5  -4  -6    4.22    2.90
   5  -4  -6    3.74    2.76
   4  -4  -6    0.78    2.31
   4  -4  -6    1.03    2.26
  -4   4   6    0.46    1.63
   3  -4  -6   17.28    2.39
   3  -4  -6   22.73    2.74
  -3   4   6   20.03    2.21
   2  -4  -6   27.00    3.02
   2  -4  -6   32.24    2.57
  -2   4   6   26.92    2.46
  -2   4   6   26.59    2.97
   1  -4  -6    4.51    1.27
   1  -4  -6    4.22    1.08
   1  -4  -6    5.68    1.72
  -1   4   6    6.04    1.35
  -1   4   6    7.26    1.60
  -1   4   6    5.35    1.13
   0  -4  -6  267.49   12.34
   0  -4  -6  257.81   14.02
   0   4   6  236.37   14.09
   0   4   6  228.67   12.70
   0   4   6  246.58   13.06
  -1  -4  -6   47.48    3.39
  -1  -4  -6   49.72    3.26
  -1  -4  -6   61.49    3.74
   1   4   6   61.38    3.86
   1   4   6   58.81    3.42
   1   4   6   57.62    3.25
  -2  -4  -6   50.37    3.24
   2   4   6   55.36    3.22
   2   4   6   56.35    3.70
  -3  -4  -6   64.69    3.50
  -3  -4  -6   64.12    3.59
   3   4   6   67.71    4.39
   3   4   6   68.31    3.65
  -4  -4  -6   21.59    1.68
  -4  -4  -6   18.89    1.71
   4   4   6   16.96    1.66
   4   4   6   22.92    2.25
  -5  -4  -6    9.44    1.37
  -5  -4  -6    7.77    1.39
   5   4   6    7.33    1.42
  -6  -4  -6   13.46    1.79
  -6  -4  -6   13.04    1.74
   6   4   6   12.12    1.93
  -7  -4  -6   19.70    2.17
   4  -5  -6   16.04    3.11
   4  -5  -6   20.80    3.41
  -4   5   6   15.56    2.99
   3  -5  -6    3.93    2.17
   3  -5  -6    6.63    2.61
  -3   5   6    8.37    1.94
  -3   5   6    7.62    2.37
   2  -5  -6   -0.14    2.07
   2  -5  -6   -1.26    1.50
  -2   5   6    1.15    1.53
  -2   5   6   -0.30    1.69
   1  -5  -6   23.13    2.31
   1  -5  -6   27.30    2.76
  -1   5   6   25.73    2.71
  -1   5   6   24.66    2.34
   0  -5  -6    0.76    1.52
   0   5   6    1.59    1.29
   0   5   6    0.77    0.89
   0   5   6    0.16    1.40
  -1  -5  -6  133.62    7.79
  -1  -5  -6  132.53    6.78
   1   5   6  131.73    7.19
   1   5   6  130.71    7.15
   1   5   6  136.85    8.07
   2   5   6   13.92    1.60
   2   5   6   15.51    2.06
   3   5   6   60.64    4.27
   4   5   6    0.46    1.70
  -5  -5  -6   12.28    1.48
  -5  -5  -6   15.08    1.51
   5   5   6   13.67    1.61
  -6  -5  -6    2.72    1.38
  -6  -5  -6    2.06    1.36
   6   5   6    1.31    1.51
   3  -6  -6    3.00    2.99
   3  -6  -6    4.58    2.36
  -3   6   6    1.98    2.36
   2  -6  -6   50.27    4.56
   2  -6  -6   44.18    3.81
  -2   6   6   44.25    4.21
  -2   6   6   48.67    3.82
   1  -6  -6   11.01    1.88
   1  -6  -6   10.32    2.53
  -1   6   6   12.06    2.05
  -1   6   6   12.22    2.41
   0  -6  -6   10.83    1.58
   0  -6  -6   11.90    2.14
   0   6   6    9.57    2.21
   0   6   6   11.34    1.94
  -1  -6  -6   14.19    1.48
   1   6   6   15.17    1.98
   1   6   6   13.39    1.40
   1   6   6   16.87    2.36
   2   6   6    9.07    2.15
   2   6   6   12.15    1.76
   3   6   6   11.89    2.32
   4   6   6   12.13    2.45
   2  -7  -6   -0.57    2.94
   2  -7  -6   -1.92    2.00
  -2   7   6    4.51    2.54
   1  -7  -6   46.74    4.31
   1  -7  -6   39.28    3.51
  -1   7   6   37.78    4.03
   0  -7  -6    2.64    1.57
   0   7   6    0.10    1.84
   0   7   6    0.28    2.27
   1   7   6   30.05    2.97
   1   7   6   32.37    3.61
   2   7   6    5.34    2.42
   3   7   6    8.04    2.59
   4   7   6    2.21    2.40
   2   7  -7    3.25    1.91
   1   7  -7   -0.92    1.79
  -1  -7   7   -0.39    1.74
   0  -7   7   12.87    2.03
   1  -7   7    5.07    1.98
   4   6  -7   40.33    3.59
   3   6  -7    2.43    2.10
  -3  -6   7    2.48    1.66
   2   6  -7   55.14    3.85
  -2  -6   7   52.25    3.89
   1   6  -7    0.15    1.64
  -1  -6   7    0.75    1.52
   0  -6   7    5.31    1.64
   1  -6   7    4.26    1.78
   2  -6   7   11.19    2.17
   3  -6   7   16.71    2.61
   5   5  -7   12.62    2.62
  -5  -5   7   15.71    2.15
   4   5  -7   -0.42    1.91
  -4  -5   7   -0.46    1.62
   3   5  -7    4.36    2.03
  -3  -5   7    4.74    1.65
   2   5  -7    6.37    1.79
  -2  -5   7    7.99    1.85
   1   5  -7   30.93    2.67
  -1  -5   7   35.22    2.56
   0  -5   7   31.74    2.48
   1  -5   7    1.75    1.37
   2  -5   7   35.72    2.95
   3  -5   7   38.20    3.24
   4  -5   7    0.54    2.35
   4  -5   7    0.27    2.09
  -5  -4   7    7.55    1.92
   4   4  -7   85.78    5.42
  -4  -4   7   78.78    4.93
   3   4  -7    3.04    1.82
  -3  -4   7   -0.14    1.39
   2   4  -7    9.49    1.79
  -2  -4   7    9.38    1.78
   1   4  -7    6.13    1.43
  -1  -4   7    6.89    1.36
   0   4  -7   13.88    1.91
   0  -4   7   15.62    1.61
  -1   4  -7   49.90    3.53
   1  -4   7   54.56    3.31
   2  -4   7   -1.38    1.25
   3  -4   7  107.02    6.04
   4  -4   7   23.24    2.64
   5  -4   7    2.60    2.47
   5  -4   7    3.20    2.27
  -6  -3   7   -2.81    1.85
  -5  -3   7    6.40    1.94
   4   3  -7    0.01    1.78
  -4  -3   7    0.94    1.50
   3   3  -7   50.71    3.51
  -3  -3   7   39.43    3.20
   2   3  -7   27.83    2.77
  -2  -3   7   31.21    2.47
  -2  -3   7   32.59    2.60
   1   3  -7    5.44    1.37
  -1  -3   7    3.75    1.30
  -1  -3   7    5.21    1.29
  -1  -3   7    2.64    1.18
   0   3  -7   54.88    4.13
   0   3  -7   69.33    3.96
   0   3  -7   61.52    3.57
   0  -3   7   63.84    3.66
   0  -3   7   67.32    4.04
   0  -3   7   63.42    4.24
  -1   3  -7   88.67    4.73
   1  -3   7   85.93    5.29
   1  -3   7   84.67    4.76
  -2   3  -7    1.79    0.90
  -2   3  -7    2.80    1.07
   2  -3   7    1.80    1.13
  -3   3  -7   33.03    2.49
  -3   3  -7   31.40    2.66
  -3   3  -7   37.07    2.54
   3  -3   7   33.57    2.67
  -4   3  -7   40.45    2.93
   4  -3   7   33.14    3.00
   5  -3   7    5.04    2.27
   5  -3   7    5.93    2.10
   6  -3   7    0.07    2.21
   6  -3   7    2.84    2.44
   5   2  -7    1.29    2.55
  -5  -2   7   -1.18    1.72
   4   2  -7    4.45    2.33
   4   2  -7    1.86    1.79
  -4  -2   7    3.76    1.52
   3   2  -7    0.00    2.00
   3   2  -7    0.92    1.57
  -3  -2   7   -0.13    0.87
  -3  -2   7    0.09    1.27
   2   2  -7   23.91    2.48
   2   2  -7   21.73    2.57
  -2  -2   7   22.28    1.73
  -2  -2   7   15.86    2.11
  -2  -2   7   25.62    2.28
   1   2  -7   81.77    4.57
   1   2  -7   68.12    4.26
   1   2  -7   69.84    4.10
  -1  -2   7   75.79    4.42
  -1  -2   7   78.91    4.41
  -1  -2   7   82.33    4.54
   0   2  -7   -0.40    1.01
   0   2  -7    1.92    1.08
   0   2  -7    0.32    0.96
   0  -2   7   -0.17    1.27
   0  -2   7    1.12    0.93
   0  -2   7   -0.45    1.04
  -1   2  -7  361.96   17.65
  -1   2  -7  358.91   18.82
  -1   2  -7  362.77   18.86
  -1   2  -7  366.80   18.84
  -1   2  -7  366.74   17.93
   1  -2   7  343.00   19.03
   1  -2   7  345.32   17.66
   1  -2   7  364.91   18.98
  -2   2  -7  144.95    7.51
  -2   2  -7  147.14    8.15
  -2   2  -7  148.46    8.14
  -2   2  -7  150.50    7.68
   2  -2   7  143.89    8.15
   2  -2   7  149.30    8.28
   2  -2   7  146.86    7.61
  -3   2  -7   35.75    2.65
  -3   2  -7   35.16    2.82
  -3   2  -7   37.78    2.57
  -3   2  -7   38.05    2.84
   3  -2   7   34.31    2.63
  -4   2  -7   24.47    2.43
  -4   2  -7   23.43    2.33
   4  -2   7   27.34    2.34
  -5   2  -7   26.74    2.60
   5  -2   7   28.83    3.21
   5  -2   7   28.40    2.81
  -6   2  -7   14.40    2.37
   6  -2   7   16.93    2.45
   6  -2   7   15.07    2.56
  -6  -1   7   -1.12    1.90
   5   1  -7   36.56    3.90
  -5  -1   7   42.96    3.39
   4   1  -7   23.41    2.96
  -4  -1   7   25.47    2.47
  -4  -1   7   25.27    2.44
   3   1  -7   -1.24    1.37
   3   1  -7   -0.22    1.80
   3   1  -7   -0.14    1.12
  -3  -1   7    0.43    1.22
  -3  -1   7    1.28    1.45
  -3  -1   7    0.58    0.86
   2   1  -7   48.44    3.38
   2   1  -7   53.03    3.87
   2   1  -7   37.99    3.10
   2   1  -7   47.85    2.91
  -2  -1   7   38.44    3.11
  -2  -1   7   53.97    3.30
  -2  -1   7   49.77    2.90
   1   1  -7   50.88    3.40
   1   1  -7   49.12    3.24
   1   1  -7   50.58    4.00
   1   1  -7   62.25    3.36
   1   1  -7   56.98    3.55
   1   1  -7   59.32    3.71
  -1  -1   7   53.31    3.71
  -1  -1   7   66.62    3.53
  -1  -1   7   58.04    3.40
   0   1  -7    1.36    1.13
   0   1  -7    0.95    1.04
   0   1  -7    0.84    1.00
   0   1  -7    0.77    0.90
   0   1  -7    1.84    0.86
   0  -1   7    1.14    1.15
   0  -1   7    0.51    0.90
   0  -1   7    0.53    0.90
  -1   1  -7   51.48    3.24
  -1   1  -7   46.23    3.05
  -1   1  -7   46.64    3.17
  -1   1  -7   50.53    2.81
  -1   1  -7   49.78    3.02
  -1   1  -7   48.61    2.88
   1  -1   7   49.06    3.20
   1  -1   7   46.89    2.84
   1  -1   7   48.46    3.14
  -2   1  -7  188.94    9.44
  -2   1  -7  177.70   10.09
  -2   1  -7  196.08   10.33
  -2   1  -7  197.84    9.62
  -2   1  -7  176.70   10.16
   2  -1   7  188.49   10.15
   2  -1   7  187.62   10.09
   2  -1   7  191.67   10.23
   2  -1   7  189.26    9.49
  -3   1  -7    0.71    1.08
  -3   1  -7    0.57    1.04
  -3   1  -7   -0.75    1.38
  -3   1  -7    1.31    1.43
   3  -1   7    0.55    1.25
   3  -1   7   -0.48    1.04
   3  -1   7   -0.28    1.01
  -4   1  -7    2.35    1.26
  -4   1  -7    3.06    1.31
   4  -1   7    1.59    1.25
  -5   1  -7   12.06    1.87
  -5   1  -7   11.49    1.87
   5  -1   7    9.91    1.75
   5  -1   7   11.56    1.90
  -6   1  -7   53.29    4.00
  -6   1  -7   56.84    4.24
   6  -1   7   60.63    4.42
  -7   1  -7    3.45    2.13
   6   0  -7    1.63    3.06
  -6   0   7    0.16    1.95
   5   0  -7    1.84    2.62
  -5   0   7    0.00    1.61
   4   0  -7   13.79    1.98
   4   0  -7   10.57    1.85
   4   0  -7   11.57    2.54
   4   0  -7   10.52    1.87
  -4   0   7   16.70    1.77
  -4   0   7   13.20    1.82
   3   0  -7   64.85    5.21
   3   0  -7   71.24    4.72
   3   0  -7   77.61    4.59
   3   0  -7   74.93    4.40
  -3   0   7   73.77    4.38
  -3   0   7   80.06    4.43
   2   0  -7    0.38    1.19
   2   0  -7    0.00    1.64
   2   0  -7   -0.33    1.04
   2   0  -7   -0.47    1.33
   2   0  -7   -0.53    1.04
  -2   0   7   -0.85    1.21
  -2   0   7    0.06    1.06
  -2   0   7   -0.72    0.73
  -2   0   7    0.74    1.21
   1   0  -7  303.45   16.02
   1   0  -7  331.60   18.19
   1   0  -7  352.13   17.17
   1   0  -7  347.29   17.23
   1   0  -7  295.26   16.29
  -1   0   7  354.05   17.18
  -1   0   7  307.35   17.10
  -1   0   7  307.44   16.08
   0   0  -7  176.52   10.19
   0   0  -7  182.75   10.12
   0   0  -7  202.23   10.04
   0   0  -7  196.01    9.44
   0   0  -7  161.30   10.70
   0   0  -7  191.66    9.64
   0   0   7  196.42   10.20
   0   0   7  194.50   10.14
   0   0   7  186.85    9.55
  -1   0  -7  133.19    6.89
  -1   0  -7  135.11    7.44
  -1   0  -7  142.46    7.48
  -1   0  -7  143.27    7.06
  -1   0  -7  114.16    7.56
   1   0   7  135.54    6.96
   1   0   7  137.65    7.41
   1   0   7  140.67    7.53
   1   0   7  146.34    7.51
  -2   0  -7   87.88    5.03
  -2   0  -7   89.49    4.81
  -2   0  -7   92.92    5.31
  -2   0  -7   88.38    4.70
  -2   0  -7   84.24    5.12
   2   0   7   89.69    5.09
   2   0   7   95.17    5.02
   2   0   7   86.41    4.68
   2   0   7   88.57    4.99
  -3   0  -7  117.62    6.55
  -3   0  -7  104.24    5.80
  -3   0  -7  111.25    5.96
  -3   0  -7  108.89    6.35
   3   0   7  110.88    5.82
   3   0   7  116.00    6.13
   3   0   7  109.14    6.16
   3   0   7  110.63    6.25
  -4   0  -7   26.55    2.30
  -4   0  -7   23.37    2.13
   4   0   7   25.06    2.01
   4   0   7   28.33    2.27
   4   0   7   26.33    2.17
  -5   0  -7    6.36    1.57
  -5   0  -7    5.79    1.55
   5   0   7    5.34    1.19
   5   0   7    5.76    1.46
   5   0   7    6.26    1.39
  -6   0  -7   44.39    3.50
  -6   0  -7   40.43    3.33
  -7   0  -7   23.61    2.89
  -7   0  -7   28.36    3.01
   6  -1  -7    4.66    3.13
  -6   1   7    5.05    2.08
   5  -1  -7    0.85    2.48
   5  -1  -7    4.01    2.18
  -5   1   7    1.10    1.62
   4  -1  -7   33.45    3.15
   4  -1  -7   31.18    3.35
  -4   1   7   35.95    2.81
  -4   1   7   37.41    2.91
   3  -1  -7   20.67    2.24
   3  -1  -7   24.47    2.39
   3  -1  -7   26.95    2.68
   3  -1  -7   23.24    2.44
  -3   1   7   29.23    2.31
  -3   1   7   22.27    2.18
   2  -1  -7    7.69    1.46
   2  -1  -7    6.62    1.37
   2  -1  -7    7.98    1.76
  -2   1   7    8.30    1.11
  -2   1   7    7.73    1.38
  -2   1   7    7.66    1.26
  -2   1   7    7.34    1.29
   1  -1  -7   30.32    2.86
   1  -1  -7   34.92    2.61
   1  -1  -7   33.27    2.55
   1  -1  -7   27.65    2.27
   1  -1  -7   31.33    2.36
   1  -1  -7   33.96    2.40
  -1   1   7   35.98    2.53
  -1   1   7   29.60    2.39
  -1   1   7   34.78    2.38
  -1   1   7   36.18    2.33
   0  -1  -7  278.44   13.01
   0  -1  -7  255.27   14.51
   0  -1  -7  253.63   13.78
   0  -1  -7  293.42   12.81
   0  -1  -7  279.52   13.64
   0   1   7  247.55   13.57
   0   1   7  227.02   13.64
   0   1   7  235.91   13.13
   0   1   7  246.60   12.78
  -1  -1  -7   -1.87    0.80
  -1  -1  -7    0.60    0.73
  -1  -1  -7    0.07    1.26
  -1  -1  -7   -0.53    1.16
  -1  -1  -7   -0.70    0.76
   1   1   7    0.58    0.79
   1   1   7    0.41    1.01
   1   1   7    0.18    0.73
   1   1   7    0.87    1.00
  -2  -1  -7   52.98    3.28
  -2  -1  -7   51.60    2.93
  -2  -1  -7   51.22    3.03
  -2  -1  -7   49.64    3.72
   2   1   7   54.35    3.13
   2   1   7   53.21    3.30
   2   1   7   52.41    2.98
   2   1   7   51.24    3.10
   2   1   7   53.12    3.16
   2   1   7   52.48    3.04
  -3  -1  -7   27.13    2.35
  -3  -1  -7   33.05    2.70
  -3  -1  -7   24.47    2.06
  -3  -1  -7   26.03    1.96
   3   1   7   28.90    2.03
   3   1   7   25.17    1.98
  -4  -1  -7  127.62    6.91
  -4  -1  -7  126.71    6.79
   4   1   7  133.88    7.20
   4   1   7  130.76    6.71
  -5  -1  -7    0.18    1.22
  -5  -1  -7   -1.39    1.28
  -6  -1  -7   44.61    3.39
  -6  -1  -7   40.95    3.20
  -7  -1  -7   13.84    2.33
  -7  -1  -7   13.42    2.41
   6  -2  -7    1.43    2.96
  -6   2   7    2.26    1.99
   5  -2  -7   39.34    4.06
   5  -2  -7   38.08    3.83
  -5   2   7   29.97    3.07
  -5   2   7   41.43    3.30
   4  -2  -7   -0.30    1.98
   4  -2  -7   -0.26    1.82
  -4   2   7    1.59    1.37
  -4   2   7    1.59    1.48
   3  -2  -7  174.18    9.37
   3  -2  -7  177.63   10.60
  -3   2   7  176.56    9.36
  -3   2   7  174.65    9.69
  -3   2   7  178.81    9.15
   2  -2  -7   46.87    3.67
   2  -2  -7   41.55    3.06
   2  -2  -7   39.73    3.14
  -2   2   7   47.39    2.96
  -2   2   7   42.10    3.08
  -2   2   7   49.88    2.93
  -2   2   7   48.24    3.10
   1  -2  -7   87.61    5.97
   1  -2  -7  110.61    6.04
   1  -2  -7  102.86    6.47
   1  -2  -7  108.25    5.74
  -1   2   7  113.97    5.62
  -1   2   7  103.96    5.82
  -1   2   7  115.89    6.04
  -1   2   7  111.90    5.86
  -1   2   7  109.36    5.97
   0  -2  -7   77.65    4.38
   0  -2  -7   72.42    4.39
   0  -2  -7   72.05    4.32
   0  -2  -7   78.59    4.81
   0  -2  -7   73.87    4.18
   0   2   7   78.61    4.08
   0   2   7   78.37    4.30
   0   2   7   77.74    4.36
  -1  -2  -7   77.69    4.35
  -1  -2  -7   83.68    4.92
  -1  -2  -7   72.82    4.15
  -1  -2  -7   74.18    4.30
  -1  -2  -7   72.81    4.47
   1   2   7   76.34    4.54
   1   2   7   82.60    4.62
   1   2   7   72.57    4.07
   1   2   7   79.40    4.25
  -2  -2  -7   28.03    2.48
  -2  -2  -7   23.46    1.80
  -2  -2  -7   23.46    1.87
  -2  -2  -7   26.12    1.71
   2   2   7   23.31    1.83
   2   2   7   25.74    1.83
   2   2   7   22.80    1.84
   2   2   7   24.23    1.80
   2   2   7   19.87    2.16
  -3  -2  -7   33.29    2.35
  -3  -2  -7   36.57    3.15
  -3  -2  -7   33.94    2.28
  -3  -2  -7   34.85    2.47
   3   2   7   35.01    2.15
   3   2   7   35.61    2.48
   3   2   7   33.90    2.35
  -4  -2  -7  129.13    6.83
  -4  -2  -7  131.32    7.49
  -4  -2  -7  123.50    6.69
   4   2   7  132.59    7.12
  -5  -2  -7   51.26    3.47
  -5  -2  -7   56.30    3.41
   5   2   7   56.63    3.69
  -6  -2  -7   16.07    2.14
  -6  -2  -7   24.12    2.27
  -7  -2  -7   41.16    3.30
   5  -3  -7    3.62    2.81
   5  -3  -7   -1.85    2.57
  -5   3   7    4.53    2.02
   4  -3  -7    6.65    2.42
   4  -3  -7    5.26    2.36
  -4   3   7    9.30    1.89
  -4   3   7    2.90    1.47
   3  -3  -7    3.07    1.92
   3  -3  -7    2.75    1.68
  -3   3   7    2.50    1.29
  -3   3   7    2.66    1.49
  -3   3   7    1.07    1.09
  -3   3   7    1.80    1.16
   2  -3  -7  107.34    6.60
   2  -3  -7  105.09    5.81
  -2   3   7   96.89    5.76
  -2   3   7   98.95    5.75
  -2   3   7  106.22    5.51
   1  -3  -7   -1.04    1.08
   1  -3  -7    0.24    1.47
   1  -3  -7   -0.53    1.23
   1  -3  -7    0.82    1.09
  -1   3   7   -0.14    0.74
  -1   3   7    0.23    1.12
  -1   3   7    0.46    0.90
   0  -3  -7   47.67    3.61
   0  -3  -7   62.33    3.71
   0  -3  -7   54.91    3.77
   0  -3  -7   68.71    4.17
   0  -3  -7   65.07    3.70
   0   3   7   65.85    4.20
   0   3   7   60.92    3.70
   0   3   7   61.71    3.66
   0   3   7   65.26    3.32
  -1  -3  -7   26.15    2.48
  -1  -3  -7   26.42    2.10
  -1  -3  -7   26.36    2.23
  -1  -3  -7   25.75    1.92
  -1  -3  -7   25.26    1.87
   1   3   7   27.67    2.28
   1   3   7   24.99    1.97
   1   3   7   25.52    2.02
  -2  -3  -7  121.80    6.73
  -2  -3  -7  127.26    6.33
  -2  -3  -7  118.48    7.26
  -2  -3  -7  122.35    6.46
   2   3   7  125.74    7.03
   2   3   7  125.85    7.27
   2   3   7  125.56    6.53
   2   3   7  129.81    6.75
  -3  -3  -7    7.43    1.06
  -3  -3  -7    4.29    1.03
   3   3   7    7.57    1.37
   3   3   7    4.59    1.37
   3   3   7    7.31    0.92
   3   3   7    5.87    1.04
  -4  -3  -7   52.37    3.06
  -4  -3  -7   50.09    3.10
   4   3   7   50.37    3.21
  -5  -3  -7   46.08    3.17
  -5  -3  -7   50.00    3.14
   5   3   7   50.66    3.35
  -6  -3  -7    1.01    1.56
  -6  -3  -7    1.74    1.48
  -7  -3  -7    4.63    1.78
   5  -4  -7   44.23    4.45
   5  -4  -7   34.56    4.33
   4  -4  -7    6.17    2.61
   4  -4  -7    8.37    2.71
  -4   4   7    9.97    2.15
   3  -4  -7   21.08    2.99
   3  -4  -7   21.69    2.70
  -3   4   7   25.32    2.50
   2  -4  -7   21.36    2.28
   2  -4  -7   24.92    2.78
  -2   4   7   23.41    2.38
  -2   4   7   22.22    2.81
   1  -4  -7   10.40    1.97
  -1   4   7    8.63    1.51
  -1   4   7    9.93    1.90
   0  -4  -7   23.54    2.12
   0  -4  -7   24.50    2.61
   0   4   7   25.44    2.01
   0   4   7   24.67    2.22
   0   4   7   24.83    2.53
  -1  -4  -7   10.13    1.38
  -1  -4  -7    8.15    1.47
  -1  -4  -7   14.02    1.67
   1   4   7   10.38    1.20
   1   4   7   10.31    1.65
   1   4   7   12.76    1.44
  -2  -4  -7  105.12    6.01
  -2  -4  -7  112.48    5.83
   2   4   7  109.97    6.69
   2   4   7  115.28    5.99
   2   4   7  112.00    6.08
   2   4   7  112.39    6.14
  -3  -4  -7   72.30    3.82
  -3  -4  -7   70.96    3.92
   3   4   7   74.47    3.96
   3   4   7   69.41    4.48
   3   4   7   69.54    4.06
   3   4   7   72.02    4.64
  -4  -4  -7   40.23    2.65
  -4  -4  -7   41.30    2.59
   4   4   7   42.63    3.32
   4   4   7   40.59    2.70
  -5  -4  -7   49.77    2.98
  -5  -4  -7   47.35    3.04
   5   4   7   42.01    3.15
  -6  -4  -7    2.93    1.49
  -6  -4  -7    0.85    1.49
   6   4   7    3.93    1.67
  -7  -4  -7   12.34    1.96
   4  -5  -7   30.44    3.85
   4  -5  -7   35.07    4.23
  -4   5   7   34.47    3.94
   3  -5  -7    0.77    2.57
   3  -5  -7   -0.06    2.09
  -3   5   7   -1.88    2.11
  -3   5   7   -1.31    1.67
   2  -5  -7   21.35    2.99
   2  -5  -7   19.19    2.40
  -2   5   7   21.55    2.74
  -2   5   7   21.07    2.38
   1  -5  -7   -0.13    1.37
   1  -5  -7   -0.41    1.84
  -1   5   7    0.99    1.64
  -1   5   7   -0.32    1.42
   0  -5  -7   28.72    2.89
   0   5   7   27.56    2.45
   0   5   7   28.29    2.89
   0   5   7   25.93    2.19
  -1  -5  -7    1.50    1.12
  -1  -5  -7    3.38    1.60
   1   5   7    2.43    1.28
   1   5   7    2.20    1.55
   1   5   7    1.42    0.94
  -2  -5  -7   29.37    2.46
  -2  -5  -7   37.11    2.40
   2   5   7   32.49    2.53
   2   5   7   35.69    3.05
  -3  -5  -7   38.90    2.81
   3   5   7   45.40    3.44
  -4  -5  -7    4.13    1.09
   4   5   7    3.44    1.86
   4   5   7    6.32    1.39
  -5  -5  -7   11.15    1.50
  -5  -5  -7   14.80    1.59
   5   5   7   12.45    1.65
  -6  -5  -7    0.22    1.43
  -6  -5  -7    2.86    1.44
   6   5   7    4.65    1.64
   3  -6  -7    1.03    3.08
   3  -6  -7    0.42    2.32
  -3   6   7    4.13    2.58
   2  -6  -7   14.81    2.50
   2  -6  -7   15.34    3.18
  -2   6   7   14.15    2.35
  -2   6   7   17.97    2.92
   1  -6  -7   -2.17    2.24
   1  -6  -7    2.51    1.66
  -1   6   7    3.52    1.73
  -1   6   7   -2.15    1.97
   0  -6  -7   39.00    2.99
   0  -6  -7   41.93    3.65
   0   6   7   41.87    3.80
   0   6   7   40.01    3.24
   1   6   7   41.57    3.25
   1   6   7   43.20    2.92
   1   6   7   46.10    3.86
   2   6   7   31.22    2.66
   2   6   7   28.08    3.18
   3   6   7   48.60    4.06
   4   6   7    3.55    2.20
   1  -7  -7    0.34    2.66
   1  -7  -7    1.21    1.89
  -1   7   7    1.32    2.46
   0  -7  -7   12.16    1.90
   0   7   7   10.18    2.24
   0   7   7   14.56    2.82
   1   7   7   23.31    2.62
   1   7   7   22.31    3.25
   2   7   7    4.36    2.47
   3   7   7   13.59    2.87
   4   7   7    6.80    2.66
   1   7  -8   23.18    2.69
  -1  -7   8   20.87    2.62
   0  -7   8   16.10    2.28
   3   6  -8    4.97    2.30
  -3  -6   8    7.26    1.87
   2   6  -8   10.00    2.29
  -2  -6   8    9.48    2.15
   1   6  -8    1.17    1.78
  -1  -6   8    2.49    1.72
   0   6  -8   55.83    4.08
   0  -6   8   53.39    3.65
   1  -6   8    4.65    1.88
   2  -6   8   -2.29    1.90
   3  -6   8   -0.42    2.14
  -5  -5   8    9.84    2.15
   4   5  -8    2.44    2.06
  -4  -5   8   -2.67    1.62
   3   5  -8   37.94    3.79
  -3  -5   8   53.72    3.45
   2   5  -8   36.58    3.25
  -2  -5   8   36.64    3.18
   1   5  -8   -0.09    1.60
  -1  -5   8    0.60    1.50
   0   5  -8   24.82    2.61
   0  -5   8   24.01    2.24
   1  -5   8   18.39    2.10
   2  -5   8   11.84    1.96
   3  -5   8   -0.91    1.83
   4  -5   8   15.39    2.66
  -5  -4   8   -1.10    1.84
   4   4  -8   19.23    2.58
  -4  -4   8   14.57    2.19
   3   4  -8    6.16    1.95
  -3  -4   8    0.95    1.51
   2   4  -8   87.97    5.62
  -2  -4   8   94.63    5.33
   1   4  -8   35.94    2.87
  -1  -4   8   35.48    2.75
   0   4  -8   10.32    1.76
   0  -4   8    7.15    1.49
   1  -4   8   -0.53    1.28
   2  -4   8   43.04    3.10
   3  -4   8   13.65    2.05
   4  -4   8    6.63    2.09
   5  -4   8    8.21    2.70
   5  -4   8    5.27    2.38
  -6  -3   8   -1.49    2.13
  -5  -3   8   27.93    2.86
   4   3  -8   34.20    3.21
  -4  -3   8   31.21    2.96
   3   3  -8    2.21    1.82
  -3  -3   8    3.03    1.52
   2   3  -8   16.25    2.34
  -2  -3   8   22.84    2.09
   1   3  -8   43.32    3.08
  -1  -3   8   38.83    3.08
  -1  -3   8   35.41    2.86
   0   3  -8   18.58    1.85
   0   3  -8   10.88    2.05
   0  -3   8   18.63    1.71
   0  -3   8   15.82    2.05
  -1   3  -8    2.27    1.23
   1  -3   8    2.87    1.20
  -2   3  -8   44.68    2.92
  -2   3  -8   48.38    2.94
   2  -3   8   46.59    3.11
  -3   3  -8   91.10    6.37
  -3   3  -8  122.40    6.02
  -3   3  -8  119.63    6.37
   3  -3   8  109.71    6.12
  -4   3  -8    6.27    1.60
   4  -3   8    2.69    1.75
   5  -3   8   35.46    3.91
   5  -3   8   34.91    3.25
   6  -3   8    1.06    2.39
   6  -3   8    0.62    2.28
  -6  -2   8   22.23    2.92
   5   2  -8   -1.88    2.60
  -5  -2   8    0.54    1.90
   4   2  -8   82.42    5.44
  -4  -2   8   62.86    4.44
   3   2  -8   54.11    4.26
   3   2  -8   55.17    3.71
  -3  -2   8   40.40    3.37
   2   2  -8   35.60    2.93
   2   2  -8   31.35    3.21
  -2  -2   8   34.69    2.72
  -2  -2   8   35.78    2.43
   1   2  -8   16.34    1.73
   1   2  -8   15.54    1.55
   1   2  -8   16.89    2.02
  -1  -2   8   18.20    1.97
  -1  -2   8   15.66    1.79
  -1  -2   8   19.05    1.85
   0   2  -8  133.96    7.05
   0   2  -8  131.18    7.37
   0   2  -8  130.55    6.86
   0  -2   8  140.07    7.60
   0  -2   8  131.36    6.91
   0  -2   8  131.56    7.47
  -1   2  -8    9.87    1.39
  -1   2  -8   12.80    1.39
  -1   2  -8   10.07    1.49
  -1   2  -8   11.79    1.53
  -1   2  -8    6.50    1.11
  -1   2  -8   12.38    1.40
   1  -2   8    9.77    1.32
   1  -2   8    9.92    1.58
   1  -2   8   10.16    1.79
  -2   2  -8    4.17    1.14
  -2   2  -8    0.00    1.36
  -2   2  -8    2.31    1.18
  -2   2  -8    3.19    1.43
   2  -2   8    2.81    1.30
   2  -2   8    2.77    1.18
  -3   2  -8   43.49    2.87
  -3   2  -8   38.98    3.14
  -3   2  -8   42.63    3.22
  -3   2  -8   44.65    3.00
   3  -2   8   44.70    3.01
  -4   2  -8   25.49    2.51
  -4   2  -8   23.72    2.38
   4  -2   8   27.25    2.38
  -5   2  -8    2.31    1.77
   5  -2   8    5.99    1.90
  -6   2  -8   27.62    2.98
   6  -2   8   27.09    3.18
  -6  -1   8   13.59    2.61
   5   1  -8    1.40    2.46
  -5  -1   8    0.45    1.88
   4   1  -8   12.09    2.54
  -4  -1   8    9.72    1.84
  -4  -1   8   12.44    1.91
   3   1  -8   67.67    4.56
   3   1  -8   78.46    5.17
   3   1  -8   63.31    4.22
   3   1  -8   81.51    4.26
  -3  -1   8   60.99    4.27
  -3  -1   8   73.16    4.45
   2   1  -8    8.88    1.71
   2   1  -8    8.60    1.38
   2   1  -8    6.02    1.19
   2   1  -8    5.93    1.49
   2   1  -8    8.78    2.12
  -2  -1   8    6.49    1.48
  -2  -1   8    6.06    1.06
  -2  -1   8    5.88    1.47
   1   1  -8    3.25    1.29
   1   1  -8    4.49    1.12
   1   1  -8    2.65    1.42
   1   1  -8    2.91    1.05
   1   1  -8    5.44    1.54
   1   1  -8    5.28    1.92
  -1  -1   8    2.76    1.46
  -1  -1   8    3.51    1.24
  -1  -1   8    6.05    1.35
   0   1  -8   74.90    4.48
   0   1  -8   81.30    4.37
   0   1  -8   80.56    4.84
   0   1  -8   85.41    4.57
   0   1  -8   79.55    4.76
   0  -1   8   77.96    4.47
   0  -1   8   73.75    4.68
   0  -1   8   83.84    4.83
  -1   1  -8  407.60   20.35
  -1   1  -8  436.28   21.41
  -1   1  -8  432.75   20.06
  -1   1  -8  371.38   21.49
  -1   1  -8  438.19   21.61
   1  -1   8  344.63   21.50
   1  -1   8  419.51   20.07
   1  -1   8  414.77   21.48
  -2   1  -8   30.12    2.26
  -2   1  -8   30.49    2.72
  -2   1  -8   33.20    2.20
  -2   1  -8   30.50    2.36
  -2   1  -8   28.36    2.48
   2  -1   8   29.83    2.42
   2  -1   8   32.27    2.58
   2  -1   8   30.23    2.28
  -3   1  -8  104.64    5.58
  -3   1  -8  103.61    5.67
  -3   1  -8   96.32    6.08
  -3   1  -8  103.23    6.23
   3  -1   8   98.10    5.89
   3  -1   8  108.04    6.16
   3  -1   8  109.98    5.63
  -4   1  -8   22.54    2.13
  -4   1  -8   22.45    2.22
   4  -1   8   23.73    2.09
  -5   1  -8    6.13    1.67
  -5   1  -8    5.45    1.73
   5  -1   8    4.18    1.62
  -6   1  -8    1.67    1.88
  -6   1  -8    0.58    1.84
   6   0  -8   36.67    4.50
  -6   0   8   39.67    3.71
   5   0  -8   10.10    3.08
  -5   0   8   10.20    2.21
   4   0  -8   14.62    1.98
   4   0  -8   16.90    2.25
   4   0  -8   15.67    2.13
   4   0  -8   11.78    2.84
  -4   0   8   19.51    2.04
  -4   0   8   12.78    2.09
   3   0  -8   47.10    3.37
   3   0  -8   54.74    3.35
   3   0  -8   48.10    3.39
   3   0  -8   33.97    4.01
  -3   0   8   43.77    3.24
  -3   0   8   45.01    3.28
   2   0  -8   83.90    4.30
   2   0  -8   67.98    5.14
   2   0  -8   75.61    4.51
   2   0  -8   78.38    4.62
   2   0  -8   65.45    4.52
  -2   0   8   74.08    4.51
  -2   0   8   66.63    4.26
  -2   0   8   70.85    4.45
  -2   0   8   74.68    4.30
   1   0  -8   33.07    3.03
   1   0  -8   33.57    2.60
   1   0  -8   29.06    2.28
   1   0  -8   24.67    2.22
   1   0  -8   38.33    2.65
   1   0  -8   26.39    2.50
  -1   0   8   32.41    2.39
  -1   0   8   33.74    2.52
   0   0  -8   -0.15    0.98
   0   0  -8    1.31    0.93
   0   0  -8    1.82    1.21
   0   0  -8    0.68    0.89
   0   0  -8    0.10    1.37
   0   0  -8    1.18    1.57
   0   0   8    0.47    1.14
   0   0   8    1.23    1.17
   0   0   8   -0.72    1.15
  -1   0  -8  210.50   11.61
  -1   0  -8  212.13   10.80
  -1   0  -8  210.94   11.62
  -1   0  -8  229.76   11.03
   1   0   8  216.66   11.67
   1   0   8  210.82   11.69
   1   0   8  225.72   10.89
  -2   0  -8  110.67    5.86
  -2   0  -8  107.56    6.39
  -2   0  -8  117.26    6.38
  -2   0  -8  111.53    6.00
  -2   0  -8  120.22    6.67
   2   0   8  112.85    6.29
   2   0   8  109.96    5.90
   2   0   8  110.71    6.38
   2   0   8  119.29    6.31
  -3   0  -8   16.01    2.08
  -3   0  -8   13.09    1.51
  -3   0  -8   12.44    1.80
  -3   0  -8   11.60    1.42
   3   0   8   13.41    1.41
   3   0   8   13.29    1.49
   3   0   8   11.60    1.58
   3   0   8   11.41    1.46
  -4   0  -8   84.57    4.89
  -4   0  -8   83.09    4.79
   4   0   8   85.07    5.08
   4   0   8   85.76    4.93
   4   0   8   89.90    4.82
  -5   0  -8   19.11    2.02
  -5   0  -8   16.72    1.94
   5   0   8   12.68    1.57
  -6   0  -8    4.63    1.92
  -6   0  -8    5.29    1.91
  -7   0  -8   11.69    2.40
  -7   0  -8   11.22    2.50
   6  -1  -8    4.64    3.42
  -6   1   8    1.87    2.11
   5  -1  -8   53.35    5.06
   5  -1  -8   48.85    4.42
  -5   1   8   50.25    3.84
   4  -1  -8    3.55    2.39
   4  -1  -8    5.44    2.01
  -4   1   8    8.62    1.76
  -4   1   8    6.68    1.76
   3  -1  -8    5.75    1.65
   3  -1  -8    6.59    2.14
  -3   1   8    5.40    1.47
  -3   1   8    7.55    1.56
   2  -1  -8   26.40    2.43
   2  -1  -8   29.32    2.81
   2  -1  -8   21.78    2.39
   2  -1  -8   30.27    2.35
  -2   1   8   29.26    2.36
  -2   1   8   24.52    2.12
  -2   1   8   29.36    2.42
  -2   1   8   22.83    2.30
   1  -1  -8  248.61   12.10
   1  -1  -8  211.19   12.52
   1  -1  -8  228.61   11.80
   1  -1  -8  218.26   13.41
   1  -1  -8  254.61   12.58
  -1   1   8  237.26   12.14
  -1   1   8  242.27   11.81
   0  -1  -8   37.00    2.98
   0  -1  -8   33.68    2.38
   0  -1  -8   41.15    2.57
   0  -1  -8   37.70    3.08
   0  -1  -8   37.24    2.38
   0   1   8   35.19    2.50
   0   1   8   36.38    2.72
   0   1   8   34.34    2.62
   0   1   8   31.67    2.45
   0   1   8   33.34    2.72
  -1  -1  -8  239.01   13.17
  -1  -1  -8  265.34   13.39
  -1  -1  -8  235.36   12.31
  -1  -1  -8  226.39   13.99
  -1  -1  -8  231.32   12.53
   1   1   8  262.60   12.44
   1   1   8  267.98   13.14
   1   1   8  261.52   13.24
   1   1   8  242.72   13.11
  -2  -1  -8   80.59    4.38
  -2  -1  -8   75.71    4.48
  -2  -1  -8   77.03    5.24
  -2  -1  -8   81.50    4.82
   2   1   8   88.32    4.72
   2   1   8   85.30    4.88
   2   1   8   86.36    4.55
   2   1   8   81.24    4.71
   2   1   8   84.68    4.70
   2   1   8   79.93    4.53
  -3  -1  -8   -0.20    0.97
  -3  -1  -8   -0.86    1.01
  -3  -1  -8    0.17    1.26
  -3  -1  -8    1.35    1.69
   3   1   8   -0.09    0.94
   3   1   8   -1.06    0.96
   3   1   8    0.67    0.73
  -4  -1  -8   -0.06    1.07
  -4  -1  -8   -0.28    1.17
   4   1   8    1.47    1.09
   4   1   8    0.94    1.01
  -5  -1  -8    1.34    1.36
  -5  -1  -8   -0.59    1.29
  -6  -1  -8   45.11    3.47
  -6  -1  -8   42.77    3.31
  -7  -1  -8    2.06    2.01
  -7  -1  -8    2.09    1.96
   5  -2  -8    9.69    3.19
   5  -2  -8   14.23    3.05
  -5   2   8   12.76    2.26
  -5   2   8   16.66    2.40
   4  -2  -8   17.85    3.00
   4  -2  -8   20.82    2.78
  -4   2   8   22.83    2.40
  -4   2   8   17.38    2.20
   3  -2  -8   30.37    3.22
   3  -2  -8   30.98    2.94
  -3   2   8   31.07    2.78
  -3   2   8   33.12    2.61
   2  -2  -8    6.84    1.94
  -2   2   8    7.04    1.34
  -2   2   8    5.82    1.42
  -2   2   8    5.72    1.22
  -2   2   8    7.43    1.43
   1  -2  -8  263.48   14.10
   1  -2  -8  230.09   13.19
   1  -2  -8  258.45   14.97
  -1   2   8  281.05   14.06
  -1   2   8  280.87   13.18
  -1   2   8  269.93   13.92
  -1   2   8  261.96   13.56
   0  -2  -8  202.82    9.86
   0  -2  -8  200.19    9.64
   0  -2  -8  182.52   10.20
   0  -2  -8  192.02   10.28
   0  -2  -8  182.99   11.00
   0   2   8  188.58    9.88
   0   2   8  200.85    9.60
   0   2   8  164.87   10.09
   0   2   8  198.47   10.26
  -1  -2  -8   41.63    3.39
  -1  -2  -8   57.86    3.72
  -1  -2  -8   48.06    3.00
  -1  -2  -8   51.11    3.09
  -1  -2  -8   40.87    3.17
   1   2   8   49.64    3.08
   1   2   8   57.39    3.29
   1   2   8   42.68    2.89
   1   2   8   49.14    3.34
  -2  -2  -8  104.14    5.56
  -2  -2  -8  115.18    6.36
  -2  -2  -8  114.18    6.07
  -2  -2  -8   96.24    5.67
   2   2   8  110.48    6.22
   2   2   8  113.99    5.95
   2   2   8  103.05    5.75
   2   2   8  106.07    6.16
   2   2   8  104.41    5.63
  -3  -2  -8   16.41    2.39
  -3  -2  -8   18.24    1.89
  -3  -2  -8   18.57    1.79
  -3  -2  -8   18.84    1.66
   3   2   8   17.32    1.71
   3   2   8   20.82    1.82
   3   2   8   19.74    1.70
  -4  -2  -8   20.40    2.07
  -4  -2  -8   23.74    1.99
   4   2   8   25.06    2.08
  -5  -2  -8   17.01    1.82
  -5  -2  -8   17.43    1.91
   5   2   8   16.77    1.91
  -6  -2  -8    4.52    1.66
  -6  -2  -8    4.63    1.78
  -7  -2  -8   13.01    2.25
   5  -3  -8    3.22    3.05
   5  -3  -8    4.50    3.10
  -5   3   8    5.30    2.18
   4  -3  -8    7.79    2.67
   4  -3  -8    4.96    2.49
  -4   3   8    8.57    2.02
   3  -3  -8   38.71    4.21
   3  -3  -8   40.08    3.38
  -3   3   8   38.96    3.01
  -3   3   8   43.27    3.24
  -3   3   8   39.82    2.93
   2  -3  -8    0.97    1.90
   2  -3  -8    1.87    1.49
  -2   3   8    2.77    1.08
  -2   3   8    1.17    1.05
  -2   3   8    2.31    1.45
  -2   3   8    1.00    0.86
   1  -3  -8   95.43    5.52
   1  -3  -8   99.32    5.79
   1  -3  -8  101.88    6.35
  -1   3   8  103.25    5.31
  -1   3   8   97.73    5.61
   0  -3  -8   72.50    4.18
   0  -3  -8   58.79    4.15
   0  -3  -8   63.52    4.03
   0  -3  -8   73.17    4.67
   0   3   8   65.19    4.06
   0   3   8   70.61    4.11
   0   3   8   73.71    4.66
   0   3   8   72.15    3.76
  -1  -3  -8    2.29    1.08
  -1  -3  -8    4.13    1.71
  -1  -3  -8    4.27    1.07
  -1  -3  -8    2.58    1.19
  -1  -3  -8    4.28    1.24
   1   3   8    4.35    1.14
   1   3   8    4.41    1.31
   1   3   8    4.65    1.17
  -2  -3  -8   17.00    1.81
  -2  -3  -8   22.06    2.11
  -2  -3  -8   16.70    1.61
  -2  -3  -8   19.94    1.71
   2   3   8   17.54    1.76
   2   3   8   18.16    1.59
   2   3   8   18.41    2.06
   2   3   8   17.39    1.79
  -3  -3  -8    0.66    0.96
  -3  -3  -8    1.57    0.99
   3   3   8    2.41    0.86
   3   3   8    1.38    0.99
   3   3   8    2.19    1.23
   3   3   8   -0.32    1.33
  -4  -3  -8   74.57    4.12
  -4  -3  -8   74.26    4.20
   4   3   8   69.77    4.31
   4   3   8   73.48    4.71
  -5  -3  -8    2.84    1.37
  -5  -3  -8   -0.22    1.25
   5   3   8    1.19    1.32
  -6  -3  -8   65.57    4.08
  -6  -3  -8   65.33    4.20
  -7  -3  -8    3.34    1.78
   4  -4  -8   -0.22    2.58
   4  -4  -8    5.34    2.86
  -4   4   8    5.12    2.05
   3  -4  -8   59.58    5.07
   3  -4  -8   62.83    4.53
  -3   4   8   56.60    4.15
   2  -4  -8   68.98    4.95
   2  -4  -8   64.93    4.25
  -2   4   8   65.94    4.14
  -2   4   8   51.45    4.67
   1  -4  -8   46.10    3.91
  -1   4   8   37.80    3.54
  -1   4   8   43.88    3.13
   0  -4  -8   63.00    4.02
   0  -4  -8   71.21    4.64
   0   4   8   68.20    4.65
   0   4   8   68.51    4.10
   0   4   8   65.66    4.09
  -1  -4  -8   20.27    1.94
  -1  -4  -8   21.96    2.23
  -1  -4  -8   21.05    2.01
   1   4   8   18.80    2.18
   1   4   8   19.67    1.84
   1   4   8   20.81    2.02
  -2  -4  -8   25.63    2.49
  -2  -4  -8   31.19    2.38
   2   4   8   28.43    2.55
   2   4   8   33.97    2.72
   2   4   8   31.28    2.29
  -3  -4  -8    6.06    1.16
  -3  -4  -8    3.96    1.08
   3   4   8    4.00    1.54
   3   4   8    4.80    1.03
   3   4   8    5.23    1.17
   3   4   8    3.48    1.68
  -4  -4  -8   12.89    1.49
  -4  -4  -8   14.70    1.50
   4   4   8   13.45    2.01
   4   4   8   12.30    1.54
  -5  -4  -8   31.30    2.51
  -5  -4  -8   31.54    2.48
   5   4   8   33.13    2.60
  -6  -4  -8    8.88    1.77
  -6  -4  -8    8.64    1.71
   6   4   8    7.92    1.84
   4  -5  -8   -0.57    3.17
   4  -5  -8   -2.20    2.70
  -4   5   8   -3.21    2.48
   3  -5  -8   25.82    3.55
   3  -5  -8   19.87    2.98
  -3   5   8   18.28    3.10
  -3   5   8   18.63    2.61
   2  -5  -8   24.65    2.80
   2  -5  -8   32.62    3.48
  -2   5   8   25.99    3.13
  -2   5   8   25.50    2.72
   1  -5  -8    1.34    2.13
   1  -5  -8    0.09    1.50
  -1   5   8   -0.05    1.53
  -1   5   8   -0.06    1.76
   0  -5  -8   23.46    2.05
   0  -5  -8   18.72    2.51
   0   5   8   18.81    2.09
   0   5   8   19.62    2.54
  -1  -5  -8   -1.14    1.25
   1   5   8    1.42    1.07
   1   5   8    0.99    1.28
   1   5   8    1.82    1.71
  -2  -5  -8   61.62    3.50
  -2  -5  -8   58.56    3.63
   2   5   8   64.09    4.25
   2   5   8   53.96    3.60
   2   5   8   56.34    3.63
  -3  -5  -8    0.58    1.40
   3   5   8   -0.51    1.05
   3   5   8    2.21    1.76
   3   5   8   -1.34    1.60
  -4  -5  -8   47.12    2.90
  -4  -5  -8   47.35    3.02
   4   5   8   48.76    3.90
   4   5   8   49.82    3.42
   4   5   8   46.12    3.09
  -5  -5  -8    0.77    1.25
  -5  -5  -8    1.16    1.28
   5   5   8    0.22    1.37
  -6  -5  -8    4.04    1.56
  -6  -5  -8    6.55    1.62
   6   5   8    3.12    1.70
   3  -6  -8   13.92    3.60
   3  -6  -8    9.94    2.84
  -3   6   8    9.91    2.91
   2  -6  -8   27.54    3.75
   2  -6  -8   24.01    3.07
  -2   6   8   29.43    3.61
   1  -6  -8    7.50    2.01
   1  -6  -8   10.79    2.76
  -1   6   8   11.09    2.11
  -1   6   8   13.43    2.71
   0  -6  -8   16.53    2.66
   0  -6  -8   14.67    1.96
   0   6   8   18.22    2.25
   0   6   8   13.88    2.61
   1   6   8    2.95    1.67
   1   6   8    2.74    2.11
   2   6   8   17.06    2.72
   2   6   8   16.66    2.04
   3   6   8   33.75    3.43
   4   6   8    7.40    2.39
   5   6   8   57.90    3.73
   1  -7  -8    1.68    1.97
   1  -7  -8    1.92    2.90
  -1   7   8    0.06    2.50
   0  -7  -8   13.09    2.11
   0   7   8   19.81    3.17
   1   7   8    0.55    1.86
   1   7   8    0.09    2.36
   2   7   8   29.71    3.47
   2   7   8   19.89    2.14
   3   7   8    3.32    2.57
   4   7   8    1.13    2.55
   3   6  -9    0.30    2.30
  -3  -6   9    0.38    1.79
   2   6  -9   -2.84    2.15
  -2  -6   9    1.85    1.98
   1   6  -9   27.27    3.02
  -1  -6   9   33.32    3.03
   0  -6   9    5.23    1.90
   1  -6   9   12.65    2.21
   2  -6   9   -1.56    2.01
   4   5  -9   10.46    2.41
  -4  -5   9    7.44    2.04
   3   5  -9   12.37    2.55
  -3  -5   9   20.00    2.22
   2   5  -9    0.75    2.10
  -2  -5   9    0.86    1.81
   1   5  -9   36.50    3.23
  -1  -5   9   34.42    3.05
   0   5  -9   91.95    5.69
   0  -5   9   90.10    5.25
   1  -5   9    8.12    1.84
   2  -5   9   38.51    3.20
   3  -5   9    3.76    2.06
   4  -5   9    8.33    2.48
  -5  -4   9   -0.33    1.96
  -4  -4   9   -2.14    1.73
   3   4  -9   44.73    3.87
  -3  -4   9   53.56    3.56
   2   4  -9    6.97    2.22
  -2  -4   9   11.11    1.90
   1   4  -9    1.16    1.74
  -1  -4   9    3.36    1.65
   0   4  -9   36.66    3.00
   0  -4   9   35.96    2.81
   1  -4   9    7.99    1.61
   2  -4   9    2.28    1.55
   3  -4   9   19.86    2.35
   4  -4   9   32.05    3.17
   5  -4   9    0.37    2.22
   5  -4   9    1.58    2.56
  -5  -3   9    4.67    2.20
  -4  -3   9    0.59    1.76
   3   3  -9   34.72    3.28
  -3  -3   9   39.15    3.07
   2   3  -9  120.43    7.60
  -2  -3   9  139.10    7.05
   1   3  -9   20.90    2.30
  -1  -3   9   17.74    2.12
   0   3  -9  113.78    6.62
   0  -3   9  116.35    6.22
  -1   3  -9   25.51    2.42
   1  -3   9   25.24    2.32
  -2   3  -9    9.07    1.48
   2  -3   9    7.27    1.54
  -3   3  -9    6.23    1.52
  -3   3  -9    4.71    1.49
   3  -3   9    7.47    1.67
   4  -3   9    3.43    1.76
   5  -3   9   48.44    3.84
  -6  -2   9   -3.44    2.23
   5   2  -9   40.81    3.93
  -5  -2   9   22.37    3.03
   4   2  -9    8.48    2.65
  -4  -2   9    4.78    1.89
   3   2  -9    1.78    2.26
   3   2  -9    3.74    1.84
  -3  -2   9   -0.04    1.48
   2   2  -9  102.30    7.58
   2   2  -9  128.41    7.10
  -2  -2   9  132.83    6.65
   1   2  -9   40.94    3.33
   1   2  -9   42.95    2.84
  -1  -2   9   41.44    3.20
  -1  -2   9   44.30    3.25
   0   2  -9    0.63    1.08
   0   2  -9    1.18    1.16
   0   2  -9    1.54    1.51
   0   2  -9    1.68    1.10
   0   2  -9    0.40    0.93
   0  -2   9    0.07    1.20
   0  -2   9   -0.69    1.42
   0  -2   9    0.74    1.24
  -1   2  -9   69.39    4.40
  -1   2  -9   70.14    4.35
  -1   2  -9   67.36    4.22
  -1   2  -9   71.92    4.12
  -1   2  -9   75.49    4.21
   1  -2   9   69.23    4.07
  -2   2  -9   60.25    3.53
  -2   2  -9   61.35    3.76
  -2   2  -9   55.11    3.95
  -2   2  -9   58.75    4.01
   2  -2   9   62.66    3.67
  -3   2  -9   -0.33    1.23
  -3   2  -9   -0.32    1.28
  -3   2  -9   -0.71    1.55
   3  -2   9    0.62    1.28
  -4   2  -9   33.61    2.96
  -4   2  -9   37.36    2.85
   4  -2   9   36.21    2.94
  -5   2  -9    0.94    1.75
   5  -2   9    0.49    1.76
  -6   2  -9   13.67    2.44
   6  -2   9    8.90    2.54
  -6  -1   9   -1.23    2.23
   5   1  -9   25.39    3.46
  -5  -1   9   24.79    3.00
   4   1  -9   80.00    5.41
  -4  -1   9   64.00    4.48
  -4  -1   9   64.38    4.53
   3   1  -9   10.57    2.35
   3   1  -9    7.96    1.49
   3   1  -9    7.73    1.70
  -3  -1   9    4.66    1.64
  -3  -1   9    8.72    1.90
   2   1  -9  174.62    9.23
   2   1  -9  142.73    7.83
   2   1  -9  137.40    8.23
   2   1  -9  167.22    8.55
   2   1  -9  133.43    8.33
  -2  -1   9  153.31    7.99
   1   1  -9   71.98    4.15
   1   1  -9   72.31    4.36
   1   1  -9   64.43    4.83
   1   1  -9   54.40    4.24
   1   1  -9   70.26    3.93
  -1  -1   9   68.73    4.34
  -1  -1   9   65.47    4.37
  -1  -1   9   69.52    4.09
   0   1  -9    1.52    1.07
   0   1  -9    1.99    1.05
   0   1  -9    0.26    1.12
   0   1  -9    1.68    1.50
   0   1  -9    0.38    1.47
   0  -1   9    1.91    1.31
   0  -1   9   -0.85    1.28
   0  -1   9    1.90    1.33
  -1   1  -9    0.62    1.50
  -1   1  -9    0.71    1.29
  -1   1  -9   -0.29    1.15
  -1   1  -9    0.91    1.32
  -1   1  -9    2.28    1.15
   1  -1   9    0.80    1.17
   1  -1   9    0.12    1.15
   1  -1   9    0.32    1.08
  -2   1  -9    7.66    1.71
  -2   1  -9   12.11    1.43
  -2   1  -9   11.68    1.54
  -2   1  -9   11.83    1.99
   2  -1   9   12.18    1.47
   2  -1   9    8.69    1.54
   2  -1   9   10.58    1.65
  -3   1  -9  156.60    8.80
  -3   1  -9  169.01    8.66
   3  -1   9  170.04    9.39
   3  -1   9  177.57    8.72
  -4   1  -9    5.19    1.52
  -4   1  -9    4.17    1.42
   4  -1   9    4.31    1.46
  -5   1  -9  143.18    8.05
  -5   1  -9  146.93    7.87
   5  -1   9  145.97    7.88
  -6   1  -9    2.65    2.04
  -6   1  -9    1.11    1.94
   6   0  -9    6.25    3.28
  -6   0   9    2.36    2.33
   5   0  -9    4.01    2.94
  -5   0   9    3.32    2.13
   4   0  -9   86.57    7.07
  -4   0   9  111.52    6.11
  -4   0   9  108.02    6.13
   3   0  -9   55.15    3.53
   3   0  -9   48.00    3.43
   3   0  -9   51.76    3.53
   3   0  -9   43.19    4.22
  -3   0   9   41.37    3.32
  -3   0   9   41.53    3.42
   2   0  -9    4.05    1.44
   2   0  -9    6.77    1.59
   2   0  -9    4.68    1.55
   2   0  -9    4.86    2.03
  -2   0   9    7.92    1.73
  -2   0   9    5.97    1.49
  -2   0   9    3.92    0.91
   1   0  -9   30.79    2.44
   1   0  -9   31.04    2.70
   1   0  -9   32.37    2.72
   1   0  -9   37.79    3.22
   1   0  -9   23.49    2.29
   1   0  -9   32.13    2.70
  -1   0   9   31.78    2.42
  -1   0   9   32.68    2.54
   0   0  -9  109.46    5.62
   0   0  -9  105.53    6.66
   0   0  -9  101.40    6.05
   0   0  -9  100.97    6.28
   0   0  -9  106.61    5.77
   0   0  -9  102.67    5.90
   0   0   9  108.85    6.10
   0   0   9  108.15    6.12
   0   0   9  104.22    5.77
  -1   0  -9   26.42    2.37
  -1   0  -9   30.60    2.38
  -1   0  -9   31.07    2.23
  -1   0  -9   24.33    2.50
   1   0   9   28.69    2.54
   1   0   9   33.86    2.46
   1   0   9   22.12    2.41
  -2   0  -9   96.85    5.94
  -2   0  -9   99.31    5.29
  -2   0  -9   97.27    5.15
  -2   0  -9   89.99    5.58
   2   0   9   97.47    5.54
   2   0   9   93.70    5.64
   2   0   9   97.05    5.52
   2   0   9   97.50    5.21
  -3   0  -9   22.99    2.02
  -3   0  -9   20.96    1.91
  -3   0  -9   19.62    2.45
   3   0   9   20.57    1.96
   3   0   9   19.62    2.10
   3   0   9   20.63    1.93
  -4   0  -9   49.99    3.46
  -4   0  -9   51.70    3.42
   4   0   9   55.70    3.43
   4   0   9   53.14    3.57
   4   0   9   55.35    3.41
  -5   0  -9    1.34    1.54
  -5   0  -9    0.68    1.51
  -6   0  -9   33.08    3.01
  -6   0  -9   32.64    3.20
  -7   0  -9    9.82    2.34
   6  -1  -9    8.34    3.74
   5  -1  -9    0.39    3.08
  -5   1   9    0.14    1.95
   4  -1  -9   57.54    4.36
   4  -1  -9   52.49    5.08
  -4   1   9   56.38    4.03
  -4   1   9   58.07    4.04
   3  -1  -9   29.61    3.42
   3  -1  -9   34.46    3.02
  -3   1   9   32.75    2.89
  -3   1   9   32.88    2.85
   2  -1  -9    7.37    1.63
   2  -1  -9    3.68    1.71
   2  -1  -9    3.16    1.41
   2  -1  -9    4.05    2.11
  -2   1   9    3.17    1.35
  -2   1   9    3.71    1.37
  -2   1   9    4.24    1.33
  -2   1   9    4.68    1.57
   1  -1  -9   24.14    2.01
   1  -1  -9   22.81    2.23
   1  -1  -9   21.03    1.95
   1  -1  -9   14.56    2.45
  -1   1   9   19.12    1.95
  -1   1   9   25.23    2.16
  -1   1   9   18.62    2.09
   0  -1  -9   32.59    3.10
   0  -1  -9   31.96    2.82
   0  -1  -9   32.92    2.53
   0  -1  -9   31.23    2.37
   0  -1  -9   31.50    2.29
   0   1   9   35.14    2.61
   0   1   9   31.76    2.44
   0   1   9   30.63    2.74
   0   1   9   31.28    2.59
   0   1   9   33.80    2.51
  -1  -1  -9  186.40   10.12
  -1  -1  -9  207.58   11.04
  -1  -1  -9  188.95   10.33
  -1  -1  -9  198.14   11.57
   1   1   9  198.78   10.76
   1   1   9  213.43   10.74
   1   1   9  208.87   10.19
  -2  -1  -9    3.59    1.18
  -2  -1  -9    4.34    1.39
  -2  -1  -9    5.18    1.12
  -2  -1  -9    3.07    1.96
   2   1   9    3.18    1.30
   2   1   9    5.46    1.05
   2   1   9    3.75    1.23
   2   1   9    3.46    1.19
   2   1   9    4.31    0.79
   2   1   9    3.42    1.29
  -3  -1  -9  234.78   12.86
  -3  -1  -9  238.72   11.85
   3   1   9  227.19   12.20
   3   1   9  223.77   11.63
   3   1   9  235.30   12.39
  -4  -1  -9    0.72    1.20
  -4  -1  -9    1.02    1.27
  -5  -1  -9   15.31    1.96
  -5  -1  -9   14.68    1.86
  -6  -1  -9   -0.34    1.75
  -6  -1  -9    1.87    1.66
  -7  -1  -9    9.05    2.24
   5  -2  -9   24.45    3.92
   5  -2  -9   18.63    3.49
  -5   2   9   20.90    2.72
   4  -2  -9   20.62    3.39
   4  -2  -9   22.41    3.06
  -4   2   9   23.48    2.55
  -4   2   9   26.66    2.72
   3  -2  -9    8.86    2.09
   3  -2  -9   12.65    2.58
  -3   2   9    7.10    1.70
  -3   2   9   12.34    1.97
   2  -2  -9   57.75    4.37
  -2   2   9   56.88    3.51
  -2   2   9   53.12    3.60
  -2   2   9   53.89    3.66
  -2   2   9   49.83    3.48
   1  -2  -9   15.01    1.87
   1  -2  -9   10.01    1.68
   1  -2  -9   10.63    1.99
   1  -2  -9   15.30    2.33
  -1   2   9   16.47    1.89
  -1   2   9   14.25    1.45
  -1   2   9   17.47    1.62
  -1   2   9   14.67    1.67
   0  -2  -9   57.80    3.84
   0  -2  -9   51.55    3.42
   0  -2  -9   62.74    3.42
   0  -2  -9   63.43    3.61
   0  -2  -9   46.49    4.25
   0   2   9   54.97    3.22
   0   2   9   53.25    3.55
   0   2   9   55.52    3.70
   0   2   9   50.58    3.35
  -1  -2  -9   23.82    2.42
  -1  -2  -9   31.25    2.87
  -1  -2  -9   32.90    2.94
  -1  -2  -9   25.73    2.27
  -1  -2  -9   27.54    2.29
   1   2   9   25.47    2.34
   1   2   9   30.51    2.40
   1   2   9   30.93    2.60
   1   2   9   20.41    2.12
  -2  -2  -9   63.11    4.24
  -2  -2  -9   57.48    3.42
  -2  -2  -9   61.53    3.81
  -2  -2  -9   55.77    3.58
   2   2   9   53.73    3.70
   2   2   9   57.65    3.93
   2   2   9   64.78    3.54
   2   2   9   63.01    3.76
   2   2   9   61.85    3.77
  -3  -2  -9   45.47    2.93
  -3  -2  -9   45.08    3.95
  -3  -2  -9   47.53    3.07
   3   2   9   45.35    3.04
   3   2   9   51.20    3.17
   3   2   9   48.89    3.12
  -4  -2  -9   95.21    5.27
  -4  -2  -9   98.36    5.40
   4   2   9   95.82    5.53
  -5  -2  -9   16.42    2.00
  -5  -2  -9   20.44    2.00
  -6  -2  -9    4.92    1.76
  -6  -2  -9    5.49    1.85
  -7  -2  -9    7.92    2.12
   5  -3  -9    7.94    3.41
   5  -3  -9    5.37    3.24
   4  -3  -9    3.21    2.80
   4  -3  -9    6.02    2.70
  -4   3   9    3.56    2.03
   3  -3  -9    4.70    2.44
   3  -3  -9    6.23    2.16
  -3   3   9    6.38    1.96
   2  -3  -9   14.58    2.51
   2  -3  -9   11.92    2.08
  -2   3   9   13.70    1.94
  -2   3   9   10.93    1.47
  -2   3   9    8.88    1.24
  -2   3   9   13.58    1.61
   1  -3  -9  108.21    6.76
   1  -3  -9  133.09    7.83
  -1   3   9  123.77    6.91
  -1   3   9  137.05    6.64
   0  -3  -9   16.76    1.84
   0  -3  -9   20.57    1.91
   0  -3  -9   22.68    2.47
   0  -3  -9   18.24    2.05
   0  -3  -9   17.89    1.88
   0   3   9   21.84    2.17
   0   3   9   21.46    2.37
   0   3   9   18.93    2.00
  -1  -3  -9  111.34    7.64
  -1  -3  -9  125.38    7.09
  -1  -3  -9  127.07    6.64
  -1  -3  -9  123.14    6.78
   1   3   9  131.54    6.83
   1   3   9  121.52    7.14
   1   3   9  140.22    7.56
  -2  -3  -9    1.40    1.21
  -2  -3  -9   -0.05    1.13
  -2  -3  -9   -0.74    1.67
  -2  -3  -9   -0.21    1.13
   2   3   9    0.06    1.49
   2   3   9    2.65    1.12
   2   3   9    1.16    1.20
  -3  -3  -9   23.01    2.11
  -3  -3  -9   25.49    2.01
   3   3   9   26.12    2.33
   3   3   9   25.34    2.14
   3   3   9   23.36    2.37
   3   3   9   28.66    2.02
  -4  -3  -9   -1.04    1.17
  -4  -3  -9   -1.31    1.14
   4   3   9    0.00    1.15
   4   3   9   -0.27    1.31
  -5  -3  -9   13.91    1.77
  -5  -3  -9   12.32    1.76
   5   3   9    8.91    1.73
  -6  -3  -9   25.09    2.48
  -6  -3  -9   25.73    2.49
  -7  -3  -9    3.12    1.82
   4  -4  -9    7.54    3.00
   4  -4  -9    8.92    3.37
   3  -4  -9    1.55    2.31
   3  -4  -9    9.26    2.86
  -3   4   9    8.12    2.14
   2  -4  -9    5.26    1.95
   2  -4  -9    6.91    2.47
  -2   4   9    4.44    1.80
   1  -4  -9   21.36    2.76
   1  -4  -9   23.31    2.30
  -1   4   9   20.19    2.22
  -1   4   9   15.45    2.50
   0  -4  -9   37.58    3.30
   0  -4  -9   23.13    2.38
   0   4   9   35.91    2.70
   0   4   9   31.66    3.01
  -1  -4  -9   34.27    2.54
  -1  -4  -9   34.46    2.67
  -1  -4  -9   28.81    2.94
   1   4   9   28.21    2.51
   1   4   9   32.52    2.59
   1   4   9   35.03    3.06
  -2  -4  -9  129.47    6.92
  -2  -4  -9  120.37    7.06
   2   4   9  128.80    7.49
   2   4   9  140.36    7.87
   2   4   9  134.36    7.02
  -3  -4  -9    7.90    1.30
  -3  -4  -9    6.55    1.37
   3   4   9    8.40    1.80
   3   4   9    8.40    1.87
   3   4   9    8.12    1.39
  -4  -4  -9    4.98    1.26
  -4  -4  -9    2.64    1.27
   4   4   9    3.60    1.29
   4   4   9    3.09    1.68
  -5  -4  -9    7.66    1.66
  -5  -4  -9   10.84    1.68
   5   4   9    9.30    1.70
  -6  -4  -9   -0.50    1.56
  -6  -4  -9    2.65    1.68
   6   4   9    1.82    1.78
   3  -5  -9   35.70    4.27
   3  -5  -9   31.80    3.64
  -3   5   9   20.18    3.50
   2  -5  -9    4.85    2.12
   2  -5  -9    2.97    2.88
  -2   5   9    4.69    2.29
  -2   5   9    4.95    1.97
   1  -5  -9   58.53    4.12
   1  -5  -9   65.24    5.14
  -1   5   9   57.20    4.05
  -1   5   9   54.19    4.56
   0  -5  -9    3.60    1.69
   0  -5  -9    4.95    2.12
   0   5   9    7.31    1.71
   0   5   9    5.73    2.06
  -1  -5  -9    4.19    1.56
  -1  -5  -9    4.38    1.70
   1   5   9    6.87    1.99
   1   5   9    8.43    1.62
   1   5   9    5.43    1.34
  -2  -5  -9    5.29    1.37
  -2  -5  -9    3.12    1.48
   2   5   9    1.12    1.29
   2   5   9    0.94    1.41
   2   5   9    2.28    1.72
  -3  -5  -9   10.07    1.66
  -3  -5  -9    7.10    1.68
   3   5   9   10.46    2.15
   3   5   9    7.91    1.98
   3   5   9    6.68    1.53
  -4  -5  -9   23.99    2.10
  -4  -5  -9   25.40    2.22
   4   5   9   22.90    2.23
   4   5   9   30.02    2.98
   4   5   9   19.44    2.34
  -5  -5  -9   -1.45    1.34
  -5  -5  -9   -1.42    1.33
   5   5   9    0.66    1.42
  -6  -5  -9   49.88    3.33
   6   5   9   48.94    3.65
   2  -6  -9   17.24    3.53
   2  -6  -9   10.04    2.66
  -2   6   9   14.97    3.09
   1  -6  -9    3.66    2.00
   1  -6  -9    4.71    2.99
  -1   6   9    7.47    2.57
  -1   6   9    5.81    2.02
   0  -6  -9   71.75    4.58
   0  -6  -9   73.66    5.31
   0   6   9   69.46    4.72
   0   6   9   69.81    5.40
  -1  -6  -9    2.27    1.56
   1   6   9   -0.21    2.16
   1   6   9    1.10    1.67
  -2  -6  -9    5.70    1.65
   2   6   9   13.58    1.90
   2   6   9    8.64    1.61
   2   6   9   11.32    2.51
  -3  -6  -9   11.35    1.74
   3   6   9    8.43    2.49
   4   6   9   -0.69    1.64
   4   6   9    0.05    1.45
   4   6   9    1.60    2.24
  -5  -6  -9    7.96    1.72
   5   6   9    5.24    1.65
   1  -7  -9    0.90    2.08
  -1   7   9    0.04    2.62
   0  -7  -9   -0.06    1.71
   0   7   9    0.26    2.54
  -1  -7  -9    3.63    1.65
   1   7   9    2.93    2.56
   1   7   9    0.92    1.92
   2   7   9   14.33    3.09
   3   7   9   -2.95    2.52
   4   7   9   45.18    4.51
   2   6 -10   -0.89    2.47
  -2  -6  10   -0.22    1.90
  -1  -6  10   -0.30    2.11
   0  -6  10    0.75    1.99
   1  -6  10   35.28    3.26
   2  -6  10   -0.56    2.06
  -4  -5  10    3.47    1.95
   3   5 -10   23.47    2.96
  -3  -5  10   22.34    2.48
   2   5 -10    8.06    2.65
  -2  -5  10   11.57    2.14
   1   5 -10    0.11    2.25
  -1  -5  10    3.22    2.01
   0  -5  10    1.03    1.75
   1  -5  10    5.00    1.88
   2  -5  10   35.05    3.15
   3  -5  10    1.18    2.12
  -5  -4  10    9.91    2.40
  -4  -4  10    2.48    1.91
   3   4 -10    2.92    2.12
  -3  -4  10    2.52    1.74
   2   4 -10   -0.99    2.19
  -2  -4  10    1.12    1.69
   1   4 -10   69.88    4.68
  -1  -4  10   61.06    4.30
   0   4 -10    7.98    1.99
   0  -4  10    4.15    1.67
   1  -4  10   52.16    3.57
   2  -4  10   -1.25    1.61
   3  -4  10   10.44    2.14
   4  -4  10    2.03    2.14
  -5  -3  10   13.23    2.53
  -4  -3  10    3.22    1.95
  -3  -3  10    1.27    1.65
   2   3 -10    1.32    1.94
  -2  -3  10    1.97    1.55
   1   3 -10   15.61    2.29
  -1  -3  10   12.36    2.10
   0   3 -10  143.21    8.12
   0  -3  10  140.26    7.57
   1  -3  10    5.84    1.58
   2  -3  10  111.65    6.16
   3  -3  10   -0.17    1.58
   4  -3  10   -1.11    1.77
   5  -3  10   -2.50    2.05
   5   2 -10    1.26    2.83
  -5  -2  10   -1.74    2.22
   4   2 -10    2.32    2.64
  -4  -2  10   -0.27    1.83
   3   2 -10   90.39    5.96
  -3  -2  10   75.94    5.00
   2   2 -10    0.68    2.28
   2   2 -10    0.69    1.67
  -2  -2  10    2.61    1.48
   1   2 -10   80.97    5.64
   1   2 -10   97.84    5.07
  -1  -2  10   92.47    5.33
   0   2 -10    0.70    1.09
   0   2 -10    0.32    1.24
   0   2 -10   -0.42    0.95
   0   2 -10    0.10    1.12
   0   2 -10    1.10    1.61
   0  -2  10    0.19    1.36
  -1   2 -10   47.04    2.92
  -1   2 -10   42.89    3.23
  -1   2 -10   39.02    3.04
  -1   2 -10   43.92    3.21
   1  -2  10   42.36    3.05
  -2   2 -10   -0.52    1.48
  -2   2 -10   -1.78    1.30
  -2   2 -10    0.08    1.22
  -2   2 -10   -1.12    1.59
   2  -2  10    1.22    1.29
  -3   2 -10   20.33    2.09
  -3   2 -10   16.28    1.91
   3  -2  10   19.60    2.07
  -4   2 -10   59.29    3.89
   4  -2  10   60.32    3.98
  -5   2 -10   -1.63    1.69
   5  -2  10   -0.31    1.84
  -6   2 -10   21.44    2.74
   6  -2  10   15.89    2.85
   5   1 -10    3.60    2.91
  -5  -1  10   -0.26    2.28
   4   1 -10    1.77    2.55
  -4  -1  10    0.50    1.91
  -4  -1  10   -2.19    1.74
   3   1 -10   16.85    1.97
   3   1 -10   23.84    2.98
  -3  -1  10   23.81    2.44
  -3  -1  10   19.68    2.28
   2   1 -10  178.11   10.17
   2   1 -10  220.49   11.14
   2   1 -10  163.62    9.49
   2   1 -10  161.26   10.04
  -2  -1  10  210.60    9.74
   1   1 -10   24.78    2.09
   1   1 -10   19.48    1.83
   1   1 -10   17.75    2.13
   1   1 -10   18.13    2.20
   1   1 -10   12.42    1.71
   1   1 -10   17.89    2.64
  -1  -1  10   20.68    1.98
  -1  -1  10   17.63    1.98
   0   1 -10  201.49    9.41
   0   1 -10  161.37   10.21
   0   1 -10  173.00   10.18
   0   1 -10  201.86    9.96
   0   1 -10  194.01    9.60
   0  -1  10  205.68   10.26
   0  -1  10  167.02    9.57
   0  -1  10  165.30   10.17
  -1   1 -10    1.22    1.35
  -1   1 -10   -0.47    1.37
  -1   1 -10    0.86    1.70
  -1   1 -10    2.11    1.30
   1  -1  10   -0.35    0.55
   1  -1  10    2.05    1.34
   1  -1  10    1.66    1.28
  -2   1 -10   15.96    1.79
  -2   1 -10    9.49    1.82
  -2   1 -10   16.92    1.67
  -2   1 -10   15.18    2.25
   2  -1  10    9.62    1.73
   2  -1  10   14.06    1.70
   2  -1  10   11.16    1.74
  -3   1 -10    0.78    1.37
  -3   1 -10    0.65    1.26
   3  -1  10    0.46    1.28
  -4   1 -10    3.23    1.49
  -4   1 -10    0.61    1.47
   4  -1  10    2.29    1.46
  -5   1 -10   58.54    3.99
  -5   1 -10   50.05    3.75
   5  -1  10   53.98    3.84
  -6   1 -10   -0.25    1.99
  -6   1 -10    1.21    2.11
   5   0 -10   29.32    4.07
  -5   0  10   34.04    3.44
   4   0 -10    0.21    2.57
  -4   0  10    0.65    1.91
  -4   0  10    1.16    1.88
   3   0 -10   34.60    3.03
   3   0 -10   29.78    2.91
   3   0 -10   33.30    3.65
  -3   0  10   25.13    2.62
  -3   0  10   32.17    2.95
   2   0 -10    4.47    2.02
   2   0 -10    0.49    1.39
   2   0 -10    3.95    1.58
   2   0 -10    2.33    1.53
  -2   0  10    5.49    1.75
  -2   0  10    2.37    1.44
   1   0 -10   42.14    3.02
   1   0 -10   38.00    3.18
   1   0 -10   40.67    2.76
   1   0 -10   39.45    3.67
   1   0 -10   33.31    2.68
  -1   0  10   38.12    2.86
  -1   0  10   34.50    2.75
  -1   0  10   37.98    2.93
   0   0 -10   30.62    2.99
   0   0 -10   28.58    2.40
   0   0 -10   28.79    3.13
   0   0 -10   27.80    2.24
   0   0 -10   28.96    2.26
   0   0  10   31.51    2.50
   0   0  10   31.78    2.67
   0   0  10   31.01    2.53
  -1   0 -10   59.69    4.31
  -1   0 -10   67.72    3.93
  -1   0 -10   71.31    3.81
  -1   0 -10   58.85    3.99
   1   0  10   65.80    3.92
   1   0  10   59.34    4.06
   1   0  10   46.70    3.97
  -2   0 -10  126.75    6.49
  -2   0 -10  110.35    6.77
  -2   0 -10  120.73    6.26
   2   0  10  121.28    6.33
   2   0  10  108.26    6.83
   2   0  10  120.54    6.74
  -3   0 -10    3.31    1.26
  -3   0 -10    2.62    1.35
   3   0  10    1.21    1.22
   3   0  10    1.52    1.27
   3   0  10    0.89    1.39
  -4   0 -10   54.33    3.53
  -4   0 -10   52.45    3.40
   4   0  10   50.60    3.34
   4   0  10   47.80    3.57
   4   0  10   52.82    3.43
  -5   0 -10   13.19    1.94
  -5   0 -10    9.14    1.96
  -6   0 -10    3.01    2.00
  -6   0 -10    0.07    1.89
   5  -1 -10    5.44    3.44
  -5   1  10    3.59    2.20
   4  -1 -10   73.82    6.74
   4  -1 -10   88.87    5.88
  -4   1  10   95.35    5.65
  -4   1  10   95.26    5.63
   3  -1 -10   16.85    3.09
   3  -1 -10   16.85    2.37
  -3   1  10   18.39    2.29
  -3   1  10   16.36    2.13
   2  -1 -10   97.84    7.04
   2  -1 -10  113.14    6.01
  -2   1  10  111.21    6.01
  -2   1  10  101.71    6.12
   1  -1 -10    2.88    1.64
   1  -1 -10    3.15    1.39
   1  -1 -10    2.92    1.98
   1  -1 -10    4.26    1.30
   1  -1 -10    3.22    1.63
  -1   1  10    0.87    1.28
  -1   1  10    3.50    1.36
  -1   1  10    1.37    1.53
   0  -1 -10   24.17    2.31
   0  -1 -10   20.56    2.09
   0  -1 -10   27.21    2.65
   0  -1 -10   18.89    2.23
   0  -1 -10   21.07    1.90
   0   1  10   26.46    2.29
   0   1  10   21.71    2.13
   0   1  10   22.88    2.25
   0   1  10   22.06    2.33
  -1  -1 -10    0.09    1.19
  -1  -1 -10    0.07    1.64
  -1  -1 -10   -0.68    1.93
  -1  -1 -10    1.00    1.36
  -1  -1 -10    2.03    1.39
   1   1  10   -0.17    1.27
   1   1  10    0.75    1.15
   1   1  10    2.27    1.33
  -2  -1 -10   -1.24    1.19
  -2  -1 -10   -1.76    1.96
  -2  -1 -10    0.22    1.10
  -2  -1 -10   -0.47    1.28
   2   1  10    1.42    1.21
   2   1  10    0.05    0.75
   2   1  10   -1.41    1.33
   2   1  10    1.05    1.04
  -3  -1 -10  118.14    6.27
  -3  -1 -10  118.17    6.09
   3   1  10  111.83    6.24
   3   1  10  116.67    6.36
   3   1  10  115.17    6.14
   3   1  10  105.86    6.43
  -4  -1 -10   16.13    1.82
  -4  -1 -10   17.99    1.95
  -5  -1 -10   86.97    5.16
  -5  -1 -10   91.54    5.30
  -6  -1 -10    2.58    1.84
  -6  -1 -10    1.82    1.86
  -7  -1 -10    5.11    2.24
   5  -2 -10    1.82    3.40
   5  -2 -10    2.04    3.00
  -5   2  10    1.75    2.09
   4  -2 -10   12.82    2.82
   4  -2 -10   11.37    3.28
  -4   2  10   11.75    2.40
  -4   2  10   10.84    2.24
   3  -2 -10   16.68    3.03
   3  -2 -10   14.15    2.42
  -3   2  10   13.91    2.09
  -3   2  10   20.19    2.36
   2  -2 -10   14.45    2.14
   2  -2 -10   14.97    2.73
  -2   2  10    8.20    1.58
  -2   2  10   15.85    1.79
  -2   2  10   16.53    2.08
  -2   2  10   15.38    1.86
   1  -2 -10  102.32    6.09
   1  -2 -10  103.88    5.85
   1  -2 -10   97.60    6.88
  -1   2  10   99.70    5.92
  -1   2  10  105.07    6.06
  -1   2  10  120.89    6.12
  -1   2  10  104.14    5.75
   0  -2 -10   37.34    2.43
   0  -2 -10   29.91    2.97
   0  -2 -10   38.01    2.64
   0  -2 -10   29.24    2.95
   0   2  10   24.75    2.33
   0   2  10   25.70    2.01
   0   2  10   24.35    2.38
   0   2  10   20.85    2.28
  -1  -2 -10    3.21    1.71
  -1  -2 -10    5.91    1.93
  -1  -2 -10    0.76    1.26
  -1  -2 -10    1.49    1.38
  -1  -2 -10    1.22    1.39
   1   2  10    3.81    1.48
   1   2  10    3.50    1.50
   1   2  10    2.44    1.20
   1   2  10    2.81    1.44
  -2  -2 -10   48.40    3.33
  -2  -2 -10   63.49    4.21
  -2  -2 -10   53.86    3.49
  -2  -2 -10   58.22    3.69
   2   2  10   59.28    3.57
   2   2  10   63.58    3.88
   2   2  10   42.80    3.52
   2   2  10   55.73    3.37
  -3  -2 -10    7.05    1.34
  -3  -2 -10    6.54    1.41
   3   2  10    6.64    1.24
   3   2  10    7.41    1.41
   3   2  10    3.49    1.41
  -4  -2 -10    1.81    1.26
  -4  -2 -10    1.79    1.35
   4   2  10    0.45    1.27
  -5  -2 -10    3.23    1.56
  -5  -2 -10    3.41    1.56
  -6  -2 -10   33.35    3.07
  -6  -2 -10   34.41    2.96
  -7  -2 -10    1.74    1.96
   5  -3 -10    8.79    3.55
   5  -3 -10    1.12    3.57
   4  -3 -10   50.71    5.34
   4  -3 -10   49.79    4.82
  -4   3  10   58.45    4.32
   3  -3 -10    4.44    2.24
   3  -3 -10    3.84    2.72
  -3   3  10    5.02    2.04
   2  -3 -10    3.01    2.37
  -2   3  10    2.04    1.75
  -2   3  10    1.19    1.16
   1  -3 -10    0.98    1.53
   1  -3 -10    0.64    2.14
  -1   3  10    2.53    1.54
   0  -3 -10    1.34    2.03
   0  -3 -10    1.35    1.53
   0  -3 -10   -0.05    1.31
   0   3  10    2.41    1.45
   0   3  10    0.95    1.72
  -1  -3 -10  105.78    7.04
  -1  -3 -10  114.64    6.23
  -1  -3 -10  107.92    6.68
  -1  -3 -10  117.57    6.07
   1   3  10  120.08    6.32
   1   3  10  108.51    6.63
   1   3  10  116.50    6.91
  -2  -3 -10   28.05    2.63
  -2  -3 -10   29.95    2.53
  -2  -3 -10   31.58    3.14
   2   3  10   34.60    2.72
   2   3  10   33.98    2.61
   2   3  10   39.50    3.06
  -3  -3 -10  190.27   10.33
  -3  -3 -10  203.00   10.15
   3   3  10  200.31   10.84
   3   3  10  204.82   10.35
   3   3  10  203.74   11.45
  -4  -3 -10   11.90    1.70
  -4  -3 -10   13.36    1.70
   4   3  10   14.87    1.81
  -5  -3 -10    4.50    1.61
  -5  -3 -10    4.90    1.60
   5   3  10    2.91    1.60
  -6  -3 -10    9.81    1.98
  -6  -3 -10    6.69    1.95
   4  -4 -10   -2.91    2.80
   4  -4 -10   -1.19    3.36
   3  -4 -10   40.95    4.26
   3  -4 -10   48.17    4.96
  -3   4  10   54.58    4.10
   2  -4 -10    6.57    2.79
   2  -4 -10    6.28    2.20
  -2   4  10    8.69    2.09
   1  -4 -10    2.96    1.84
   1  -4 -10    0.77    2.28
  -1   4  10    2.02    1.71
  -1   4  10   -1.22    1.88
   0  -4 -10   28.10    3.00
   0  -4 -10   22.12    2.29
   0  -4 -10   21.91    2.54
   0   4  10   26.89    2.88
   0   4  10   27.30    2.57
  -1  -4 -10    1.14    1.37
  -1  -4 -10    0.81    1.40
  -1  -4 -10    0.99    2.03
   1   4  10    2.71    1.69
   1   4  10    0.83    1.42
  -2  -4 -10   24.69    2.53
  -2  -4 -10   27.16    2.43
   2   4  10   27.01    2.88
   2   4  10   28.53    2.46
   2   4  10   30.54    2.77
  -3  -4 -10    0.86    1.35
  -3  -4 -10    3.43    1.37
   3   4  10    3.54    1.48
   3   4  10    1.02    1.74
   3   4  10    2.87    1.63
  -4  -4 -10   50.69    3.54
  -4  -4 -10   60.13    3.45
   4   4  10   55.09    3.72
   4   4  10   60.28    4.18
  -5  -4 -10    0.29    1.49
  -5  -4 -10    0.39    1.45
   5   4  10   -1.00    1.50
  -6  -4 -10    8.87    1.94
  -6  -4 -10    8.63    1.88
   3  -5 -10    0.05    3.23
   3  -5 -10   -2.61    2.61
  -3   5  10   -2.72    2.58
   2  -5 -10    0.87    3.03
   2  -5 -10   -2.42    2.09
  -2   5  10   -0.83    1.98
  -2   5  10    0.77    2.22
   1  -5 -10   44.88    3.72
   1  -5 -10   50.55    4.48
  -1   5  10   49.63    3.73
  -1   5  10   37.14    3.99
   0  -5 -10    0.73    2.26
   0  -5 -10   -1.20    1.72
   0   5  10   -0.68    1.59
   0   5  10   -1.36    1.89
  -1  -5 -10  137.34    7.34
  -1  -5 -10  115.59    7.46
   1   5  10  149.53    8.57
   1   5  10  145.60    7.58
  -2  -5 -10   15.96    1.85
  -2  -5 -10   17.20    2.00
   2   5  10   13.67    1.86
   2   5  10   18.73    2.52
  -3  -5 -10    4.41    1.66
  -3  -5 -10    3.55    1.71
   3   5  10    3.81    2.02
  -4  -5 -10    6.73    1.61
  -4  -5 -10    3.76    1.52
   4   5  10    4.12    1.57
   4   5  10    3.28    2.15
  -5  -5 -10    3.47    1.59
  -5  -5 -10    6.11    1.60
   5   5  10    4.67    1.72
  -6  -5 -10   13.09    2.01
   6   5  10   15.88    2.27
   2  -6 -10    5.31    3.40
   2  -6 -10    5.27    2.52
  -2   6  10   10.30    2.96
   1  -6 -10   -0.62    2.02
   1  -6 -10   -0.87    2.93
  -1   6  10    0.26    2.48
   0   6  10   22.07    3.21
   0   6  10   23.95    2.69
  -1  -6 -10   -2.29    1.63
   1   6  10    0.14    2.30
   1   6  10    1.85    1.73
  -2  -6 -10   37.49    3.37
  -2  -6 -10   43.55    3.22
   2   6  10   54.63    4.27
  -3  -6 -10    2.10    1.66
  -3  -6 -10    4.77    1.55
   3   6  10    1.83    2.34
  -4  -6 -10   15.84    2.13
   4   6  10   16.82    2.88
   5   6  10    2.01    1.67
   0  -7 -10    2.99    1.94
   0   7  10    2.75    2.68
  -1  -7 -10    7.44    1.95
   1   7  10    8.23    2.91
   2   7  10    0.02    2.67
   3   7  10    5.78    2.93
  -1  -6  11   -1.28    2.27
   0  -6  11    1.34    2.17
   1  -6  11    3.89    2.22
  -3  -5  11   42.69    3.47
  -2  -5  11    1.47    1.91
  -1  -5  11   26.14    3.02
   0  -5  11    3.03    2.06
   1  -5  11    1.14    1.96
   2  -5  11   -0.36    2.00
   3  -5  11    1.96    2.19
  -4  -4  11   21.95    2.64
  -3  -4  11   -0.01    1.77
  -2  -4  11   13.01    2.09
  -1  -4  11    3.02    2.03
   0  -4  11    3.09    1.84
   1  -4  11   83.68    5.05
   2  -4  11    4.52    1.87
   3  -4  11   32.63    3.11
   4  -4  11   19.01    2.76
  -5  -3  11   27.45    3.14
  -4  -3  11   -0.57    1.95
  -3  -3  11   57.75    4.02
  -2  -3  11   10.74    1.90
  -1  -3  11   -0.92    1.83
   0  -3  11    0.31    1.60
   1  -3  11   -1.86    1.52
   2  -3  11   85.31    5.03
   3  -3  11    0.16    1.69
   4  -3  11   46.88    3.70
   5  -3  11   -0.46    2.23
   5   2 -11    0.64    2.86
  -5  -2  11   -2.12    2.32
   4   2 -11    9.55    2.87
  -4  -2  11    4.61    2.04
   3   2 -11    0.99    2.42
  -3  -2  11   -1.16    1.62
  -2  -2  11   29.54    2.73
  -1  -2  11  122.27    6.77
   0   2 -11    3.02    1.48
   0   2 -11    4.01    1.16
   0   2 -11    5.34    1.33
   0  -2  11    6.95    1.75
  -1   2 -11   76.90    5.06
  -1   2 -11   84.98    4.72
  -1   2 -11   70.92    4.68
   1  -2  11   84.93    4.73
  -2   2 -11   15.33    1.97
  -2   2 -11   12.90    2.26
  -2   2 -11   15.95    2.03
  -2   2 -11   16.72    1.92
   2  -2  11   18.67    1.99
  -3   2 -11   -2.98    1.35
   3  -2  11    0.04    1.47
  -4   2 -11   19.26    2.30
   4  -2  11   20.15    2.38
  -5   2 -11   24.92    2.68
   5  -2  11   19.61    2.68
  -6   2 -11    8.61    2.43
   6  -2  11    8.86    2.58
   5   1 -11   49.26    4.86
  -5  -1  11   36.61    3.88
   4   1 -11   19.94    3.29
  -4  -1  11   11.82    2.38
  -4  -1  11   18.49    2.58
   3   1 -11    0.62    2.36
  -3  -1  11    0.78    1.83
  -3  -1  11    0.54    1.66
   2   1 -11    3.42    1.58
   2   1 -11   -0.56    1.51
   2   1 -11    2.63    2.30
   2   1 -11    0.99    1.41
  -2  -1  11    4.90    1.61
   1   1 -11    0.80    2.16
   1   1 -11    1.93    1.51
   1   1 -11   -0.62    1.21
   1   1 -11   -0.19    1.18
   1   1 -11    0.82    1.63
  -1  -1  11    1.63    1.40
   0   1 -11  186.14    8.68
   0   1 -11  173.11    8.83
   0   1 -11  137.58    9.42
   0   1 -11  176.98    9.16
   0  -1  11  161.99    8.92
  -1   1 -11    9.15    1.53
  -1   1 -11   10.05    1.83
  -1   1 -11    7.57    2.04
  -1   1 -11    9.00    1.70
   1  -1  11   10.72    1.78
  -2   1 -11  188.50    9.98
  -2   1 -11  198.97   10.24
   2  -1  11  196.69   10.05
  -3   1 -11    0.89    1.46
  -3   1 -11    1.37    1.38
   3  -1  11    1.28    1.43
  -4   1 -11    8.54    1.75
  -4   1 -11    6.84    1.79
   4  -1  11    6.68    1.72
  -5   1 -11    2.97    1.85
  -5   1 -11   -1.32    1.82
   5  -1  11    1.72    1.79
  -6   1 -11   13.06    2.44
   5   0 -11   -2.67    2.88
  -5   0  11   -3.41    2.23
   4   0 -11   18.42    3.21
  -4   0  11   14.52    2.51
  -4   0  11   10.05    2.39
   3   0 -11   55.27    4.22
   3   0 -11   63.18    4.95
  -3   0  11   64.58    4.24
  -3   0  11   57.79    4.13
   2   0 -11    1.91    1.56
   2   0 -11    1.59    2.07
   2   0 -11    0.54    1.55
  -2   0  11    3.07    1.76
  -2   0  11    2.45    1.54
   1   0 -11  110.66    6.99
   1   0 -11  115.61    7.52
   1   0 -11  125.70    6.71
   1   0 -11  120.50    6.41
  -1   0  11  121.55    6.54
   0   0 -11    0.06    1.85
   0   0 -11    2.03    1.26
   0   0 -11    0.61    1.11
   0   0 -11    1.13    1.21
   0   0 -11    3.12    2.14
   0   0  11    0.31    1.47
   0   0  11    1.07    1.25
   0   0  11    1.43    1.42
  -1   0 -11    2.11    1.55
  -1   0 -11    0.87    1.41
  -1   0 -11    1.54    1.92
  -1   0 -11    0.93    1.39
   1   0  11   -0.87    1.55
   1   0  11    2.10    1.58
   1   0  11    1.05    1.50
  -2   0 -11   17.13    1.94
  -2   0 -11   15.67    1.77
   2   0  11   18.08    1.90
   2   0  11   12.06    2.00
   2   0  11   13.68    1.87
  -3   0 -11   48.70    3.23
  -3   0 -11   48.83    3.43
   3   0  11   52.83    3.31
   3   0  11   44.11    3.58
   3   0  11   49.19    3.36
  -4   0 -11   14.02    1.85
  -4   0 -11   11.27    1.89
   4   0  11   13.08    1.81
   4   0  11    9.65    1.90
  -5   0 -11   -0.06    1.68
  -5   0 -11    1.87    1.65
  -6   0 -11   26.64    2.93
  -6   0 -11   27.59    2.88
   5  -1 -11    0.35    3.45
  -5   1  11   -2.22    2.22
   4  -1 -11    0.16    3.09
   4  -1 -11    3.37    2.48
  -4   1  11    1.25    1.97
  -4   1  11    3.69    2.13
   3  -1 -11   -2.27    2.54
   3  -1 -11   -2.51    1.80
  -3   1  11   -1.53    1.85
  -3   1  11   -0.88    1.60
   2  -1 -11   75.41    4.79
   2  -1 -11   74.13    5.73
  -2   1  11   79.76    4.98
  -2   1  11   83.33    4.81
   1  -1 -11   23.62    2.46
   1  -1 -11   19.37    2.69
   1  -1 -11   24.28    2.15
  -1   1  11   24.86    2.41
  -1   1  11   23.90    2.38
  -1   1  11   20.30    2.19
   0  -1 -11  260.09   13.29
   0  -1 -11  265.95   15.21
   0  -1 -11  262.51   13.56
   0   1  11  266.46   14.17
   0   1  11  279.50   13.40
   0   1  11  259.08   14.28
   0   1  11  260.17   13.78
  -1  -1 -11    1.11    1.76
  -1  -1 -11    4.14    2.11
  -1  -1 -11    1.32    1.53
  -1  -1 -11    2.23    1.42
   1   1  11    2.47    1.43
   1   1  11    2.43    1.36
   1   1  11    2.62    1.25
  -2  -1 -11    6.33    1.47
  -2  -1 -11    8.79    1.63
   2   1  11    7.60    1.37
   2   1  11    6.06    1.71
   2   1  11    9.36    1.46
  -3  -1 -11    1.76    1.29
  -3  -1 -11    3.79    1.50
   3   1  11    1.04    1.06
   3   1  11    0.84    1.43
  -4  -1 -11   19.20    2.02
  -4  -1 -11   18.11    2.08
  -5  -1 -11   14.71    2.09
  -5  -1 -11   12.24    1.97
  -6  -1 -11    1.04    1.90
  -6  -1 -11    3.58    1.93
   5  -2 -11   11.72    4.10
   4  -2 -11    1.42    3.42
   4  -2 -11   -2.61    2.51
  -4   2  11   -0.82    1.90
  -4   2  11   -0.61    2.10
   3  -2 -11   43.62    5.03
   3  -2 -11   49.23    4.13
  -3   2  11   56.70    3.97
  -3   2  11   52.05    3.93
   2  -2 -11   -0.11    2.54
   2  -2 -11   -3.05    1.73
  -2   2  11    1.31    1.76
  -2   2  11   -1.24    1.24
  -2   2  11   -2.18    1.41
   1  -2 -11   12.07    2.12
   1  -2 -11   12.06    1.76
   1  -2 -11    7.14    2.50
  -1   2  11    8.66    1.62
  -1   2  11   12.94    1.72
  -1   2  11    8.37    1.97
  -1   2  11    8.74    1.41
   0  -2 -11    3.16    1.47
   0  -2 -11    4.59    1.35
   0  -2 -11    2.39    1.97
   0   2  11    0.32    1.22
   0   2  11    0.50    1.29
   0   2  11    0.85    1.53
   0   2  11   -0.09    0.96
  -1  -2 -11   50.67    3.90
  -1  -2 -11   42.77    3.20
  -1  -2 -11   43.22    3.02
   1   2  11   36.42    3.25
   1   2  11   42.41    3.33
   1   2  11   47.34    3.05
  -2  -2 -11   22.33    2.15
  -2  -2 -11   19.67    2.02
   2   2  11   17.03    2.15
   2   2  11   26.54    2.11
  -3  -2 -11    5.70    1.50
  -3  -2 -11    4.34    1.40
   3   2  11    0.49    1.48
   3   2  11    3.55    1.51
  -4  -2 -11   25.64    2.54
  -4  -2 -11   28.53    2.39
  -5  -2 -11   38.40    3.16
  -5  -2 -11   39.22    2.98
  -6  -2 -11    1.04    1.87
  -6  -2 -11    1.22    1.80
   4  -3 -11   33.03    4.65
   4  -3 -11   30.53    4.11
  -4   3  11   42.24    3.86
   3  -3 -11    5.96    2.53
   3  -3 -11    5.97    3.17
  -3   3  11    9.35    2.33
   2  -3 -11  133.40    8.53
  -2   3  11  123.41    7.38
   1  -3 -11    4.13    1.74
   1  -3 -11    4.80    2.55
  -1   3  11    5.59    1.83
   0  -3 -11    0.65    2.24
   0  -3 -11    6.70    1.80
   0  -3 -11    7.36    1.55
   0   3  11    3.61    1.69
   0   3  11    4.37    2.04
  -1  -3 -11    0.42    1.26
  -1  -3 -11   -1.84    1.83
  -1  -3 -11    2.18    1.34
   1   3  11    2.45    1.57
   1   3  11    1.10    1.52
  -2  -3 -11   17.21    2.01
  -2  -3 -11   14.09    2.08
  -2  -3 -11   19.03    2.55
   2   3  11   20.95    2.12
   2   3  11   21.20    2.05
  -3  -3 -11   37.32    2.69
  -3  -3 -11   31.24    2.80
   3   3  11   38.78    2.96
   3   3  11   35.47    2.91
   3   3  11   38.81    2.76
  -4  -3 -11    1.92    1.51
  -4  -3 -11    4.22    1.49
   4   3  11    4.63    1.59
  -5  -3 -11   56.44    3.79
  -5  -3 -11   62.65    3.99
  -6  -3 -11   24.44    2.67
  -6  -3 -11   28.69    2.69
   4  -4 -11   -0.38    3.13
   4  -4 -11    1.20    3.66
   3  -4 -11    9.56    3.62
   3  -4 -11    3.13    2.73
  -3   4  11   11.83    2.56
   2  -4 -11    2.35    3.02
   2  -4 -11   -0.66    2.08
  -2   4  11    0.67    2.05
   1  -4 -11   42.44    4.11
   1  -4 -11   26.97    2.92
  -1   4  11   37.33    3.13
  -1   4  11   22.09    3.15
   0  -4 -11   21.90    2.69
   0  -4 -11   27.16    2.51
   0  -4 -11   27.08    3.31
   0   4  11   26.65    2.92
   0   4  11   30.39    2.86
  -1  -4 -11    2.13    2.14
  -1  -4 -11    3.14    1.59
  -1  -4 -11    2.72    1.50
   1   4  11    4.20    1.94
   1   4  11    4.20    1.67
  -2  -4 -11   25.63    2.56
  -2  -4 -11   23.33    2.38
   2   4  11   30.42    2.56
   2   4  11   25.50    2.77
  -3  -4 -11   26.00    2.72
  -3  -4 -11   29.77    2.57
   3   4  11   36.39    2.98
  -4  -4 -11   -0.63    1.42
  -4  -4 -11   -1.30    1.45
   4   4  11    0.15    1.52
  -5  -4 -11   17.73    2.17
  -5  -4 -11   18.32    2.17
   5   4  11   20.59    2.35
  -6  -4 -11   26.89    2.61
   3  -5 -11   -2.11    3.56
   3  -5 -11   -2.18    2.74
  -3   5  11   -2.37    2.56
   2  -5 -11   11.16    3.62
   2  -5 -11    4.86    2.53
  -2   5  11    4.08    2.57
  -2   5  11   11.35    2.57
   1  -5 -11    2.58    2.95
  -1   5  11    1.15    2.18
  -1   5  11    0.20    2.04
   0  -5 -11    2.05    1.97
   0  -5 -11    7.42    2.75
   0   5  11    8.38    2.44
   0   5  11    7.54    2.03
  -1  -5 -11   46.71    3.37
  -1  -5 -11   38.00    3.53
   1   5  11   46.15    3.43
   1   5  11   50.22    4.12
  -2  -5 -11    4.61    1.57
  -2  -5 -11    3.07    1.67
   2   5  11    2.05    2.03
   2   5  11    2.54    1.54
  -3  -5 -11   61.31    3.90
  -3  -5 -11   56.50    4.04
   3   5  11   64.38    4.69
  -4  -5 -11   17.62    2.10
  -4  -5 -11   14.60    2.17
   4   5  11   19.77    2.33
  -5  -5 -11   21.29    2.34
  -5  -5 -11   22.62    2.30
   5   5  11   25.91    2.58
   2  -6 -11    5.14    3.67
   2  -6 -11    5.56    2.78
  -2   6  11    1.59    2.71
   1  -6 -11   -1.13    3.20
   1  -6 -11    0.34    2.25
  -1   6  11    1.52    2.62
   0   6  11   14.92    2.46
   0   6  11    7.05    2.78
  -1  -6 -11    1.04    1.89
   1   6  11    8.31    2.06
   1   6  11    7.11    2.69
  -2  -6 -11    2.01    1.77
  -2  -6 -11   -2.93    1.88
   2   6  11    1.06    2.38
  -3  -6 -11   15.63    2.16
  -3  -6 -11   17.64    2.05
   3   6  11   13.23    2.94
  -4  -6 -11   29.97    2.81
   4   6  11   20.56    3.32
   0  -7 -11   -1.09    2.01
   1   7  11   34.56    4.22
   2   7  11    3.15    2.91
   3   7  11   12.84    3.30
  -3  -5  12    1.04    1.94
  -2  -5  12    0.87    1.97
  -1  -5  12   17.15    2.87
   0  -5  12    3.83    2.30
   1  -5  12   20.50    2.78
   2  -5  12    0.85    2.18
  -3  -4  12    6.96    2.09
  -2  -4  12   40.49    3.34
  -1  -4  12    4.99    2.32
   0  -4  12    0.98    2.05
   1  -4  12   13.97    2.36
   2  -4  12   12.20    2.28
   3  -4  12   20.08    2.70
   4  -4  12    0.00    2.21
  -4  -3  12    2.38    2.09
  -3  -3  12   56.94    4.05
  -2  -3  12    0.40    1.64
  -1  -3  12   49.14    3.84
   0  -3  12    1.98    1.92
   1  -3  12    0.99    1.74
   2  -3  12    1.55    1.82
   3  -3  12   36.39    3.21
   4  -3  12    7.81    2.25
   5  -3  12    2.86    2.35
   5   2 -12    3.63    2.98
  -5  -2  12    2.17    2.47
   4   2 -12   46.15    4.56
  -4  -2  12   39.44    3.69
   3   2 -12    2.01    2.59
  -3  -2  12    5.16    1.94
  -2  -2  12    0.76    1.63
  -1  -2  12   17.68    2.20
   0   2 -12   14.84    1.67
   0   2 -12    7.23    1.76
   0   2 -12    9.69    1.41
   0  -2  12    9.19    2.08
  -1   2 -12   57.87    3.76
  -1   2 -12   63.89    3.96
  -1   2 -12   56.45    4.25
   1  -2  12   67.62    4.13
  -2   2 -12    0.76    1.60
  -2   2 -12   -0.49    1.36
   2  -2  12    1.27    1.62
  -3   2 -12   57.96    3.94
   3  -2  12   61.42    4.00
  -4   2 -12   43.84    3.40
   4  -2  12   43.82    3.46
  -5   2 -12    1.97    2.01
   5  -2  12    3.01    2.12
   5   1 -12   38.96    4.25
  -5  -1  12   25.91    3.51
   4   1 -12    4.95    2.92
  -4  -1  12    3.12    2.24
  -4  -1  12    2.57    2.11
   3   1 -12   74.40    5.65
  -3  -1  12   74.46    4.85
  -3  -1  12   71.39    4.78
   2   1 -12    1.84    1.59
   2   1 -12    0.09    1.57
   2   1 -12    0.11    1.45
   2   1 -12    5.65    2.45
  -2  -1  12    1.99    1.62
   1   1 -12    4.53    1.41
   1   1 -12    5.88    2.34
   1   1 -12    0.57    1.68
   1   1 -12    2.32    1.37
  -1  -1  12    2.29    1.55
   0   1 -12    3.49    1.27
   0   1 -12    3.33    1.32
   0   1 -12    3.77    1.90
   0   1 -12    1.97    1.30
   0  -1  12    2.87    1.74
  -1   1 -12   34.71    3.22
  -1   1 -12   41.74    3.07
  -1   1 -12   40.81    2.89
   1  -1  12   37.87    3.25
  -2   1 -12    6.44    1.78
  -2   1 -12    7.12    1.73
   2  -1  12   10.02    1.84
  -3   1 -12    1.63    1.71
  -3   1 -12    4.24    1.58
   3  -1  12    2.39    1.65
  -4   1 -12   66.51    4.38
  -4   1 -12   59.31    4.09
   4  -1  12   65.88    4.20
  -5   1 -12    6.59    2.01
  -5   1 -12    3.88    2.08
  -6   1 -12    2.60    2.18
   5   0 -12   -3.46    2.99
  -5   0  12   -1.44    2.37
   4   0 -12    1.42    2.81
  -4   0  12    0.19    2.11
  -4   0  12   -1.20    2.18
   3   0 -12   -3.75    2.33
   3   0 -12    1.05    1.92
  -3   0  12    1.21    2.00
  -3   0  12    0.33    1.74
   2   0 -12   10.12    2.59
   2   0 -12   12.23    2.00
  -2   0  12    9.92    2.10
  -2   0  12   12.32    1.94
   1   0 -12   83.40    4.90
   1   0 -12   76.08    4.58
   1   0 -12   75.65    5.51
  -1   0  12   76.43    4.69
   0   0 -12   11.14    2.46
   0   0 -12   13.26    1.73
   0   0 -12    9.79    1.61
   0   0  12   15.44    1.88
  -1   0 -12   94.06    5.51
  -1   0 -12   89.87    5.25
   1   0  12   98.48    5.61
   1   0  12   91.70    5.42
   1   0  12   82.91    5.64
  -2   0 -12   80.81    4.50
  -2   0 -12   73.13    4.26
   2   0  12   61.96    4.55
   2   0  12   71.48    4.37
   2   0  12   58.92    4.42
  -3   0 -12   13.33    2.01
  -3   0 -12   13.39    1.87
   3   0  12    8.33    1.96
   3   0  12   15.81    1.96
  -4   0 -12   28.60    2.80
  -4   0 -12   27.59    2.57
   4   0  12   29.13    2.69
  -5   0 -12   18.49    2.36
  -5   0 -12   17.81    2.43
  -6   0 -12    2.65    2.05
  -6   0 -12    3.58    2.19
   5  -1 -12   30.97    4.53
  -5   1  12   22.81    3.26
   4  -1 -12   -4.05    2.37
   4  -1 -12   -1.94    3.20
  -4   1  12    1.29    2.23
  -4   1  12   -3.55    1.95
   3  -1 -12   -5.11    1.87
   3  -1 -12   -0.11    2.70
  -3   1  12   -1.71    1.99
  -3   1  12   -2.38    1.65
   2  -1 -12   -1.77    1.73
   2  -1 -12    1.79    2.31
  -2   1  12   -0.77    1.80
  -2   1  12    0.16    1.56
   1  -1 -12    8.47    2.39
   1  -1 -12   15.86    2.18
   1  -1 -12   13.07    1.81
  -1   1  12   13.73    1.89
  -1   1  12   11.23    2.10
   0  -1 -12   24.22    2.29
   0  -1 -12   23.85    2.28
   0  -1 -12   27.61    3.02
   0   1  12   25.64    2.56
   0   1  12   25.30    2.39
   0   1  12   29.13    2.49
   0   1  12   23.52    2.52
  -1  -1 -12   -0.55    1.45
  -1  -1 -12    0.65    1.40
  -1  -1 -12   -0.05    2.18
   1   1  12    0.27    1.44
   1   1  12    1.80    1.36
   1   1  12    0.07    1.20
  -2  -1 -12   95.69    5.63
  -2  -1 -12  101.43    5.51
   2   1  12  101.28    5.58
   2   1  12  104.59    5.59
   2   1  12   82.03    5.52
  -3  -1 -12   36.78    2.85
  -3  -1 -12   31.62    2.55
   3   1  12   29.00    2.73
   3   1  12   24.20    2.19
   3   1  12   27.94    2.32
  -4  -1 -12    7.60    1.72
  -4  -1 -12    9.83    1.90
  -5  -1 -12    1.88    1.80
  -5  -1 -12    3.02    1.77
  -6  -1 -12   18.41    2.61
  -6  -1 -12   20.40    2.61
   4  -2 -12    8.57    3.05
   4  -2 -12    6.87    3.83
  -4   2  12    7.37    2.37
  -4   2  12   13.34    2.80
   3  -2 -12   21.43    3.02
   3  -2 -12   26.30    4.05
  -3   2  12   20.07    2.64
  -3   2  12   24.01    2.90
   2  -2 -12    5.75    2.10
   2  -2 -12    1.04    2.81
  -2   2  12    4.90    2.05
  -2   2  12    4.94    1.70
   1  -2 -12   47.82    4.49
   1  -2 -12   57.58    3.89
   1  -2 -12   55.29    3.59
  -1   2  12   47.79    3.84
  -1   2  12   45.21    3.38
  -1   2  12   44.53    3.48
  -1   2  12   56.47    3.57
   0  -2 -12   76.72    5.04
   0  -2 -12   80.28    4.35
   0  -2 -12   74.49    4.09
   0   2  12   53.93    3.91
   0   2  12   59.48    4.31
   0   2  12   59.94    4.14
   0   2  12   69.96    4.12
  -1  -2 -12    4.75    2.24
  -1  -2 -12    1.86    1.38
  -1  -2 -12    2.85    1.51
   1   2  12    1.39    1.70
   1   2  12    7.46    1.49
   1   2  12    2.94    1.64
  -2  -2 -12   40.21    3.29
  -2  -2 -12   42.52    3.10
   2   2  12   41.89    3.23
   2   2  12   41.47    3.03
  -3  -2 -12   27.62    2.46
  -3  -2 -12   27.40    2.63
   3   2  12   24.30    2.44
  -4  -2 -12    1.55    1.66
  -4  -2 -12    0.69    1.53
  -5  -2 -12   -1.55    1.62
  -5  -2 -12    0.28    1.70
  -6  -2 -12   10.58    2.30
  -6  -2 -12   11.38    2.27
   4  -3 -12   -3.38    2.90
   4  -3 -12   -0.56    3.88
   3  -3 -12    0.69    3.51
   3  -3 -12    2.92    2.55
  -3   3  12    2.24    2.37
   2  -3 -12   39.42    4.60
  -2   3  12   43.05    3.75
   1  -3 -12   -2.23    2.63
   1  -3 -12   -0.48    1.71
  -1   3  12   -0.79    1.79
   0  -3 -12   79.32    5.96
   0  -3 -12  102.44    5.36
   0  -3 -12   93.63    5.02
   0   3  12   81.17    5.27
   0   3  12   69.06    5.72
  -1  -3 -12   36.87    2.81
  -1  -3 -12   45.20    3.72
  -1  -3 -12   36.55    2.94
   1   3  12   35.74    3.28
   1   3  12   35.40    3.09
  -2  -3 -12   15.52    2.15
  -2  -3 -12   22.61    2.71
  -2  -3 -12   12.50    2.06
   2   3  12   18.79    2.15
   2   3  12   16.79    2.12
  -3  -3 -12   18.33    2.15
  -3  -3 -12   19.15    2.13
   3   3  12   20.05    2.04
  -4  -3 -12   29.00    2.59
  -4  -3 -12   29.53    2.76
   4   3  12   29.91    2.90
  -5  -3 -12    3.57    1.83
  -5  -3 -12    3.10    1.81
  -6  -3 -12   10.33    2.15
   3  -4 -12   17.57    4.14
   3  -4 -12    9.46    3.06
   2  -4 -12    3.68    2.41
   2  -4 -12   18.85    3.91
  -2   4  12   13.98    2.72
   1  -4 -12    1.31    3.03
   1  -4 -12   -2.67    1.97
  -1   4  12   -2.72    2.05
  -1   4  12    1.60    2.09
   0  -4 -12   18.95    3.39
   0  -4 -12   30.84    2.74
   0  -4 -12   27.92    2.87
   0   4  12   31.75    2.89
   0   4  12   17.48    2.88
  -1  -4 -12   38.52    3.15
  -1  -4 -12   38.76    2.92
  -1  -4 -12   36.37    3.68
   1   4  12   31.44    3.47
   1   4  12   40.35    3.20
  -2  -4 -12    1.93    1.51
  -2  -4 -12    2.76    1.58
   2   4  12    2.78    1.86
   2   4  12    4.91    1.65
  -3  -4 -12   -0.45    1.70
  -3  -4 -12    1.65    1.80
   3   4  12    4.26    1.85
  -4  -4 -12   13.86    2.14
  -4  -4 -12   17.34    2.07
   4   4  12   16.15    2.35
  -5  -4 -12   56.53    3.76
  -5  -4 -12   55.22    3.94
  -6  -4 -12    1.83    1.91
   2  -5 -12   53.47    5.19
  -2   5  12   30.05    4.01
   1  -5 -12    6.60    3.44
  -1   5  12    1.04    2.37
  -1   5  12   10.96    2.46
   0  -5 -12    9.90    3.19
   0  -5 -12    9.02    2.32
   0   5  12   15.71    2.45
   0   5  12   10.91    2.69
  -1  -5 -12   17.69    2.62
  -1  -5 -12   26.44    2.48
   1   5  12   15.32    2.88
   1   5  12   19.73    2.44
  -2  -5 -12   13.81    2.18
  -2  -5 -12   19.26    2.14
   2   5  12   15.46    2.17
   2   5  12   17.71    2.78
  -3  -5 -12   13.12    2.10
  -3  -5 -12   12.84    2.02
   3   5  12   11.47    2.53
  -4  -5 -12    5.31    1.90
  -4  -5 -12    5.58    2.03
  -5  -5 -12   21.44    2.36
   5   5  12   20.29    2.68
   1  -6 -12    9.80    3.82
   1  -6 -12   10.36    2.65
  -1   6  12    7.66    2.97
   0   6  12    3.89    2.70
  -1  -6 -12    4.21    2.04
   1   6  12    4.97    2.07
   1   6  12    3.74    2.72
  -2  -6 -12    2.70    2.14
  -2  -6 -12    8.90    1.99
   2   6  12    4.67    2.66
  -3  -6 -12   33.56    2.89
  -3  -6 -12   32.42    3.05
   3   6  12   30.68    3.76
  -2  -5  13   -0.22    2.02
  -1  -5  13    3.29    2.55
   0  -5  13   26.30    3.33
   1  -5  13    3.18    2.45
   2  -5  13    6.55    2.50
  -3  -4  13    3.22    2.09
  -2  -4  13   45.82    3.62
  -1  -4  13    4.48    2.39
   0  -4  13   39.33    3.81
   1  -4  13   36.60    3.54
   2  -4  13   -2.12    2.13
   3  -4  13   14.85    2.63
  -4  -3  13    0.70    2.07
  -3  -3  13    0.22    1.87
  -2  -3  13   24.95    2.63
  -1  -3  13    8.13    2.20
   0  -3  13    2.19    2.21
   1  -3  13   48.12    3.82
   2  -3  13    2.06    2.01
   3  -3  13    1.59    2.05
   4  -3  13    1.31    2.15
   4   2 -13   47.47    4.75
  -4  -2  13   42.49    3.84
  -3  -2  13   10.70    2.18
  -2  -2  13   63.93    4.28
  -1  -2  13   33.20    3.00
   0   2 -13    1.34    1.61
   0  -2  13    0.44    2.07
  -1   2 -13   24.81    2.85
  -1   2 -13   27.51    2.30
  -1   2 -13   31.27    2.74
   1  -2  13   31.13    2.94
  -2   2 -13   23.05    2.64
   2  -2  13   29.20    2.75
  -3   2 -13   13.65    2.28
   3  -2  13   15.13    2.33
  -4   2 -13   -0.87    1.90
   4  -2  13    2.97    2.06
  -5   2 -13   12.27    2.51
   5  -2  13   12.77    2.53
   4   1 -13    4.03    3.07
  -4  -1  13    9.54    2.50
  -4  -1  13    7.47    2.34
   3   1 -13   11.83    2.98
  -3  -1  13    8.55    2.17
  -3  -1  13   12.83    2.40
   2   1 -13    3.78    2.53
  -2  -1  13    6.17    1.89
   1   1 -13   84.46    4.62
   1   1 -13   75.27    5.13
   1   1 -13   63.33    4.73
   1   1 -13   83.41    5.61
  -1  -1  13   82.95    4.77
   0   1 -13    3.29    1.44
   0   1 -13    3.73    1.43
   0   1 -13    1.29    1.35
   0  -1  13    1.70    1.78
  -1   1 -13   -1.28    1.61
  -1   1 -13   -0.57    1.52
   1  -1  13   -1.42    1.82
  -2   1 -13   -0.47    1.71
  -2   1 -13    0.60    1.80
   2  -1  13    1.29    1.75
  -3   1 -13   44.09    3.24
  -3   1 -13   34.91    3.42
   3  -1  13   44.95    3.36
  -4   1 -13    2.56    1.96
  -4   1 -13   -1.01    1.74
   4  -1  13    1.23    1.91
  -5   1 -13   25.56    2.83
   4   0 -13   46.38    4.86
  -4   0  13   40.67    3.92
  -4   0  13   41.11    4.06
   3   0 -13   25.27    3.48
   3   0 -13   15.14    2.72
  -3   0  13   24.55    2.67
  -3   0  13   26.60    2.89
   2   0 -13    0.66    2.33
   2   0 -13   -0.42    1.73
  -2   0  13   -0.36    1.85
  -2   0  13    1.16    1.64
   1   0 -13   26.97    2.71
   1   0 -13   31.26    2.64
   1   0 -13   30.52    3.29
  -1   0  13   32.03    2.78
   0   0 -13   40.91    2.84
   0   0 -13   37.00    3.84
   0   0 -13   39.26    3.04
   0   0  13   40.94    3.06
  -1   0 -13    4.94    1.79
  -1   0 -13    6.03    1.70
   1   0  13    7.32    1.94
  -2   0 -13   -1.74    1.72
  -2   0 -13    1.31    1.69
   2   0  13    1.13    1.78
  -3   0 -13   51.83    3.54
  -3   0 -13   53.11    3.82
   3   0  13   45.53    3.62
  -4   0 -13   93.48    5.42
  -4   0 -13   88.84    5.61
  -5   0 -13    3.44    2.03
  -5   0 -13    4.94    2.00
  -6   0 -13   32.84    3.27
  -6   0 -13   34.22    3.44
   4  -1 -13   -2.65    3.13
  -4   1  13    0.29    2.20
  -4   1  13   -1.58    2.31
   3  -1 -13   31.53    3.52
   3  -1 -13   40.69    4.35
  -3   1  13   47.77    3.91
  -3   1  13   39.44    3.49
   2  -1 -13    3.11    1.96
   2  -1 -13    1.01    2.41
  -2   1  13    2.90    2.10
  -2   1  13    2.99    1.71
   1  -1 -13    0.04    1.80
   1  -1 -13   -0.86    2.23
   1  -1 -13    2.42    1.54
  -1   1  13   -0.15    1.49
  -1   1  13    1.74    1.87
   0  -1 -13   -0.33    2.22
   0  -1 -13   -0.54    1.44
   0  -1 -13    2.20    1.42
   0   1  13   -1.31    1.72
   0   1  13   -1.63    1.38
   0   1  13    0.55    1.44
  -1  -1 -13   61.43    4.11
  -1  -1 -13   59.33    3.88
  -1  -1 -13   70.07    4.90
   1   1  13   68.43    3.97
   1   1  13   48.84    4.06
   1   1  13   63.66    3.91
  -2  -1 -13   10.43    1.99
  -2  -1 -13   10.57    2.08
   2   1  13    4.81    1.52
   2   1  13   11.48    1.93
   2   1  13   10.29    1.50
  -3  -1 -13   16.47    2.29
  -3  -1 -13   23.87    2.24
   3   1  13   13.66    1.73
  -4  -1 -13   10.02    2.07
  -4  -1 -13    9.40    1.94
  -5  -1 -13   13.47    2.29
  -5  -1 -13    7.93    2.11
  -6  -1 -13   -1.04    1.97
  -6  -1 -13   -0.70    2.05
   4  -2 -13   -1.73    2.77
   4  -2 -13    1.19    3.86
   3  -2 -13   10.16    3.67
   3  -2 -13    8.00    2.58
  -3   2  13    9.80    2.36
  -3   2  13    9.08    2.60
   2  -2 -13   19.44    2.63
   2  -2 -13   22.27    3.56
  -2   2  13   14.77    2.25
  -2   2  13   15.99    2.68
   1  -2 -13   10.08    2.73
   1  -2 -13   11.80    2.00
   1  -2 -13   12.64    2.34
  -1   2  13   11.50    1.66
  -1   2  13   11.63    2.34
  -1   2  13   12.16    1.89
   0  -2 -13    1.28    1.47
   0  -2 -13   -1.04    2.21
   0  -2 -13    0.51    1.59
   0   2  13    2.82    1.45
   0   2  13    0.31    1.09
   0   2  13   -0.53    1.36
   0   2  13    0.61    1.84
  -1  -2 -13   36.84    2.95
  -1  -2 -13   36.51    2.75
  -1  -2 -13   43.25    3.78
   1   2  13   25.65    3.01
   1   2  13   33.90    3.16
  -2  -2 -13  130.91    7.46
  -2  -2 -13  120.31    7.62
   2   2  13  155.80    7.68
  -3  -2 -13    8.19    1.94
  -3  -2 -13    7.57    1.87
   3   2  13    6.83    1.91
  -4  -2 -13   64.72    4.45
  -4  -2 -13   68.28    4.29
  -5  -2 -13    4.45    1.98
  -5  -2 -13    5.28    2.05
  -6  -2 -13   -0.10    1.99
   4  -3 -13   -3.60    2.96
   4  -3 -13   -3.18    4.19
   3  -3 -13   -0.44    3.85
   3  -3 -13   -2.20    2.45
  -3   3  13    2.90    2.61
   2  -3 -13    2.24    3.58
  -2   3  13    1.87    2.25
   1  -3 -13   44.43    3.41
   1  -3 -13   45.53    4.66
  -1   3  13   35.14    3.63
   0  -3 -13   12.51    2.73
   0  -3 -13   16.53    2.26
   0  -3 -13   17.09    2.06
   0   3  13    8.05    2.34
   0   3  13   12.80    2.52
  -1  -3 -13   14.41    1.86
  -1  -3 -13   16.25    2.73
  -1  -3 -13   14.09    1.99
   1   3  13    9.16    2.14
   1   3  13    7.09    2.17
  -2  -3 -13   37.80    3.05
  -2  -3 -13   39.61    3.27
  -2  -3 -13   41.70    3.72
   2   3  13   29.57    3.00
   2   3  13   35.68    3.09
  -3  -3 -13    9.17    2.10
  -3  -3 -13    8.76    1.98
   3   3  13   12.64    1.94
  -4  -3 -13    5.12    1.99
  -4  -3 -13    4.12    1.84
  -5  -3 -13   19.23    2.51
  -5  -3 -13   19.24    2.43
  -6  -3 -13   24.19    2.77
   3  -4 -13    5.02    3.01
   3  -4 -13    8.38    4.44
   2  -4 -13   -3.27    2.27
   2  -4 -13   -9.87    3.65
  -2   4  13   -0.98    2.36
   1  -4 -13   14.22    3.92
   1  -4 -13   17.11    2.76
  -1   4  13   26.20    3.07
  -1   4  13   17.45    2.96
   0  -4 -13   73.57    4.17
   0  -4 -13   61.47    4.44
   0  -4 -13   55.75    5.16
   0   4  13   45.68    4.60
   0   4  13   59.94    4.46
  -1  -4 -13   10.36    2.07
  -1  -4 -13   10.85    1.90
  -1  -4 -13   12.57    2.60
   1   4  13    8.92    2.13
   1   4  13    8.13    2.36
  -2  -4 -13   56.19    4.07
  -2  -4 -13   63.40    3.98
   2   4  13   64.38    4.70
   2   4  13   67.49    4.26
  -3  -4 -13   11.77    2.22
  -3  -4 -13    9.53    2.24
  -4  -4 -13    6.72    2.04
  -4  -4 -13    6.19    2.03
  -5  -4 -13    1.51    1.99
  -5  -4 -13    1.06    1.88
   2  -5 -13   -0.53    4.13
   2  -5 -13   -3.57    2.52
  -2   5  13    3.44    2.70
   1  -5 -13    4.68    3.84
  -1   5  13    3.25    2.46
   0  -5 -13   31.58    4.14
   0  -5 -13   33.32    3.27
   0   5  13   37.65    3.50
   0   5  13   24.52    3.61
  -1  -5 -13    5.82    2.05
  -1  -5 -13    7.11    2.29
   1   5  13    7.43    2.58
   1   5  13    8.69    2.26
  -2  -5 -13    9.03    1.97
  -2  -5 -13    7.29    2.03
   2   5  13   10.37    2.09
   2   5  13    7.84    2.55
  -3  -5 -13   15.30    2.12
  -3  -5 -13   13.71    2.20
   3   5  13   13.69    2.73
  -4  -5 -13   16.34    2.51
  -4  -5 -13   16.12    2.45
  -5  -5 -13   -3.92    1.91
   1  -6 -13    0.29    3.89
   1  -6 -13   -1.67    2.29
   0   6  13   21.09    3.53
  -1  -6 -13    6.39    2.19
   1   6  13    5.31    2.91
   1   6  13   11.88    2.40
  -2  -6 -13    5.45    2.07
  -2  -6 -13    3.16    2.21
   2   6  13    5.82    2.84
  -3  -6 -13    5.47    1.94
   3   6  13   -0.79    2.61
  -4  -6 -13    3.86    1.89
  -1  -5  14    5.49    2.61
   0  -5  14   -3.10    2.71
   1  -5  14    1.32    2.59
  -3  -4  14    4.15    2.08
  -2  -4  14    6.51    2.18
  -1  -4  14   16.24    2.82
   0  -4  14    4.35    2.71
   1  -4  14   -0.93    2.41
   2  -4  14   12.67    2.74
   3  -4  14   22.46    3.04
  -3  -3  14    0.30    1.97
  -2  -3  14    7.71    2.19
  -1  -3  14    7.67    2.29
   0  -3  14   35.77    3.66
   1  -3  14    3.86    2.38
   2  -3  14   40.57    3.76
   3  -3  14    1.90    2.30
   4  -3  14   -0.08    2.33
  -4  -2  14    8.89    2.36
  -3  -2  14   10.01    2.22
  -3  -2  14   10.74    2.51
  -2  -2  14    7.43    2.07
  -1  -2  14    0.45    1.84
   0  -2  14   37.37    3.61
   1  -2  14   58.75    4.45
  -2   2 -14    2.46    2.10
   2  -2  14    3.12    2.13
  -3   2 -14   31.58    3.19
   3  -2  14   34.08    3.34
  -4   2 -14    8.40    2.35
   4  -2  14    4.55    2.38
   4   1 -14    3.13    3.10
  -4  -1  14    2.73    2.22
   3   1 -14   13.28    3.19
  -3  -1  14   13.08    2.40
  -3  -1  14   12.49    2.51
   2   1 -14   49.97    4.70
  -2  -1  14   57.44    3.95
   1   1 -14    1.86    1.51
  -1  -1  14    3.63    1.78
   0   1 -14   24.21    2.40
   0  -1  14   24.29    2.63
  -1   1 -14    5.41    1.84
  -1   1 -14    4.79    1.71
   1  -1  14    8.15    2.29
  -2   1 -14    0.33    2.00
  -2   1 -14    0.07    1.91
   2  -1  14   -0.75    2.00
  -3   1 -14    1.49    1.97
  -3   1 -14    0.98    2.05
   3  -1  14   -4.67    1.92
  -4   1 -14   -2.77    1.86
   4  -1  14    0.48    2.11
  -5   1 -14   52.99    4.12
   4   0 -14    9.19    3.51
  -4   0  14   11.55    2.71
  -4   0  14    7.90    2.53
   3   0 -14    0.72    2.86
  -3   0  14    1.36    1.93
  -3   0  14   -0.14    2.15
   2   0 -14   37.35    4.04
   2   0 -14   31.55    3.06
  -2   0  14   36.01    3.32
  -2   0  14   34.92    3.14
   1   0 -14   96.28    5.75
   1   0 -14   93.25    5.43
   1   0 -14   89.53    6.47
  -1   0  14   92.92    5.50
  -1   0  14   98.50    5.74
   0   0 -14   12.80    1.93
   0   0 -14   11.05    2.70
   0   0 -14   13.29    1.89
   0   0  14   15.47    2.05
  -1   0 -14   45.89    3.30
  -1   0 -14   48.04    3.63
   1   0  14   44.25    3.49
  -2   0 -14    7.13    2.03
  -2   0 -14    5.38    2.16
   2   0  14    6.26    2.17
  -3   0 -14    3.84    1.90
  -3   0 -14    1.38    2.01
   3   0  14    6.36    2.12
  -4   0 -14    6.01    2.04
  -4   0 -14    0.16    2.04
  -5   0 -14   -0.85    1.96
  -5   0 -14    1.45    2.11
   4  -1 -14   26.69    4.21
  -4   1  14   22.90    3.10
   3  -1 -14    5.51    2.36
   3  -1 -14    1.01    2.98
  -3   1  14    1.45    2.37
  -3   1  14    2.87    2.02
   2  -1 -14    2.32    2.68
   2  -1 -14    6.57    2.18
  -2   1  14    3.85    1.88
  -2   1  14    5.19    2.28
   1  -1 -14   17.67    2.53
   1  -1 -14   16.72    3.00
   1  -1 -14   21.36    2.24
  -1   1  14   16.56    2.17
  -1   1  14   21.01    2.57
   0  -1 -14    1.74    2.46
   0  -1 -14    5.07    1.71
   0  -1 -14    5.39    1.60
   0   1  14    4.62    1.65
   0   1  14    4.38    1.97
  -1  -1 -14   -1.24    1.51
  -1  -1 -14    0.23    1.57
   1   1  14   -0.90    1.33
   1   1  14    1.01    1.45
  -2  -1 -14    3.68    2.08
  -2  -1 -14    6.00    1.96
   2   1  14    0.85    1.47
   2   1  14    5.86    1.40
   2   1  14    4.60    1.75
  -3  -1 -14   99.98    6.04
  -3  -1 -14   96.33    5.80
  -4  -1 -14    5.81    2.04
  -4  -1 -14    6.96    2.16
  -5  -1 -14   34.67    3.42
  -5  -1 -14   33.88    3.22
  -6  -1 -14   -0.82    2.13
   4  -2 -14   12.97    4.21
   4  -2 -14    8.47    3.21
   3  -2 -14   39.86    4.97
  -3   2  14   40.21    4.06
   2  -2 -14    8.76    3.23
   2  -2 -14    2.76    2.30
  -2   2  14    5.13    1.93
  -2   2  14    3.02    2.41
   1  -2 -14   45.97    4.54
   1  -2 -14   52.40    3.65
  -1   2  14   46.98    3.98
  -1   2  14   51.17    3.67
   0  -2 -14   17.96    2.93
   0  -2 -14   13.54    2.14
   0  -2 -14   14.35    1.98
   0   2  14   11.79    1.84
   0   2  14   16.22    2.44
  -1  -2 -14   15.40    2.80
  -1  -2 -14   10.48    1.93
  -1  -2 -14   11.09    1.86
   1   2  14   13.63    2.24
   1   2  14   12.83    2.15
  -2  -2 -14    0.60    1.92
  -2  -2 -14   -0.48    1.80
   2   2  14    0.40    1.89
  -3  -2 -14    0.29    1.99
  -3  -2 -14   -2.98    1.83
   3   2  14   -0.95    1.84
  -4  -2 -14   50.29    3.90
  -4  -2 -14   45.84    3.63
  -5  -2 -14    6.36    2.18
  -5  -2 -14    9.22    2.32
  -6  -2 -14   47.86    3.84
   3  -3 -14   16.19    4.63
   3  -3 -14   11.08    2.99
   2  -3 -14    1.32    3.73
  -2   3  14    5.29    2.51
   1  -3 -14    0.06    1.98
   1  -3 -14   -1.59    3.06
  -1   3  14   -1.96    2.25
   0  -3 -14   13.32    2.10
   0  -3 -14   13.85    2.34
   0  -3 -14   12.81    2.83
   0   3  14   11.56    2.51
   0   3  14    8.98    2.51
  -1  -3 -14   49.78    3.34
  -1  -3 -14   48.82    3.54
  -1  -3 -14   55.80    4.37
   1   3  14   39.10    3.77
   1   3  14   40.84    3.83
  -2  -3 -14    3.90    1.91
  -2  -3 -14    1.92    1.76
   2   3  14    1.73    2.04
  -3  -3 -14   55.95    4.06
  -3  -3 -14   55.95    4.30
  -4  -3 -14    0.91    1.99
  -4  -3 -14   -0.68    1.99
  -5  -3 -14    4.43    2.17
  -5  -3 -14    1.59    2.04
   2  -4 -14    3.34    2.58
   2  -4 -14    8.54    4.31
  -2   4  14   10.93    2.89
   1  -4 -14    2.87    2.38
   1  -4 -14    1.71    3.60
  -1   4  14    4.37    2.53
  -1   4  14    8.82    2.63
   0  -4 -14    0.11    2.79
   0  -4 -14   -0.12    1.85
   0  -4 -14   -1.06    2.15
   0   4  14   -0.12    2.19
   0   4  14   -1.81    2.16
  -1  -4 -14   16.24    2.88
  -1  -4 -14   11.60    2.22
  -1  -4 -14   11.01    2.04
   1   4  14    9.50    2.33
   1   4  14    5.16    2.42
  -2  -4 -14   38.44    3.13
  -2  -4 -14   43.25    3.34
   2   4  14   39.87    3.45
   2   4  14   42.59    3.85
  -3  -4 -14    5.16    2.18
  -3  -4 -14    5.03    2.11
  -4  -4 -14   73.28    4.72
  -4  -4 -14   67.61    4.90
  -5  -4 -14   -1.55    2.01
   1  -5 -14    5.32    3.95
  -1   5  14    6.66    2.69
   0  -5 -14    3.71    3.29
   0  -5 -14    3.29    2.32
   0   5  14   -1.07    2.51
   0   5  14    1.45    2.43
  -1  -5 -14   28.76    3.10
  -1  -5 -14   32.66    2.99
   1   5  14   21.95    3.51
   1   5  14   31.28    3.23
  -2  -5 -14   -0.35    1.90
  -2  -5 -14    1.87    1.86
   2   5  14    0.90    2.47
   2   5  14    1.69    2.06
  -3  -5 -14    7.35    2.03
  -3  -5 -14    6.35    1.90
  -4  -5 -14    3.21    2.18
   0   6  14   10.68    3.22
  -1  -6 -14    0.69    2.16
   1   6  14    0.58    2.86
  -2  -6 -14   47.04    3.70
  -3  -6 -14    0.60    1.93
  -2  -4  15   15.46    2.58
  -1  -4  15    0.93    2.37
   0  -4  15    5.59    3.01
   1  -4  15   11.29    3.09
   2  -4  15   -0.16    2.58
  -3  -3  15    7.31    2.25
  -2  -3  15    3.19    2.13
  -1  -3  15   -2.27    2.07
   0  -3  15   -1.86    2.56
   1  -3  15   -0.36    2.58
   2  -3  15   83.76    5.65
   3  -3  15    5.16    2.63
  -3  -2  15   -1.90    1.98
  -2  -2  15   14.36    2.41
  -1  -2  15   13.51    2.35
   0  -2  15    2.88    2.36
   1  -2  15   -0.45    2.51
   2  -2  15   -2.89    2.33
   3  -2  15   41.78    3.83
   4  -2  15   -0.18    2.49
   4   1 -15    6.35    3.16
  -4  -1  15    6.54    2.32
   3   1 -15    2.79    2.92
  -3  -1  15    2.24    2.27
  -3  -1  15    0.70    2.03
   2   1 -15    3.67    2.71
  -2  -1  15   -0.49    1.83
  -2  -1  15    0.41    2.20
  -1  -1  15    0.40    1.86
   0   1 -15   94.58    5.49
   0  -1  15   96.11    5.71
  -1   1 -15   19.70    2.32
   1  -1  15   17.43    2.81
  -2   1 -15   41.13    3.82
   2  -1  15   52.51    4.13
  -3   1 -15   -2.32    2.13
   3  -1  15   -1.59    2.25
  -4   1 -15    1.19    2.24
   4  -1  15    4.37    2.44
  -5   1 -15    2.96    2.35
   4   0 -15   10.15    3.62
  -4   0  15   10.87    2.64
   3   0 -15   15.49    3.48
  -3   0  15   18.87    2.82
  -3   0  15   16.00    2.56
   2   0 -15    1.09    2.01
   2   0 -15    1.73    2.80
  -2   0  15    3.48    2.22
  -2   0  15    3.77    1.94
   1   0 -15    2.22    1.70
   1   0 -15    2.59    2.54
  -1   0  15   -0.27    1.76
  -1   0  15   -0.40    2.00
   0   0 -15    2.69    1.71
   0   0 -15    1.74    1.61
   0   0  15    1.13    1.75
  -1   0 -15   73.01    4.67
  -1   0 -15   68.71    4.39
   1   0  15   67.98    4.52
  -2   0 -15    4.08    2.30
  -2   0 -15    2.32    2.19
   2   0  15    3.05    2.17
  -3   0 -15   66.96    4.87
  -3   0 -15   72.06    4.67
   3   0  15   58.26    4.66
  -4   0 -15    3.69    2.21
  -4   0 -15    5.22    2.37
  -5   0 -15   -1.30    2.16
  -5   0 -15    0.42    2.27
   3  -1 -15    0.84    2.31
   3  -1 -15   -0.80    3.20
  -3   1  15    0.39    2.02
  -3   1  15    0.97    2.46
   2  -1 -15   55.25    4.12
   2  -1 -15   53.44    5.20
  -2   1  15   59.12    4.39
  -2   1  15   56.58    4.13
   1  -1 -15    2.36    1.77
   1  -1 -15    1.65    2.06
   1  -1 -15    5.85    2.76
  -1   1  15    4.84    2.16
  -1   1  15    5.75    1.82
   0  -1 -15   84.37    5.11
   0  -1 -15   91.17    6.28
   0  -1 -15   86.67    5.35
   0   1  15   84.36    5.42
   0   1  15   90.03    5.23
  -1  -1 -15    0.66    1.59
  -1  -1 -15   -1.42    1.60
   1   1  15    2.00    1.68
   1   1  15    1.10    1.99
  -2  -1 -15    9.75    2.39
  -2  -1 -15   10.80    2.46
  -3  -1 -15    0.21    2.17
  -3  -1 -15    0.65    2.10
  -4  -1 -15   11.08    2.54
  -4  -1 -15   10.64    2.39
  -5  -1 -15   34.06    3.40
  -5  -1 -15   30.47    3.22
   3  -2 -15   -1.01    3.45
   3  -2 -15    0.19    2.41
   2  -2 -15    7.01    3.32
   2  -2 -15    5.06    2.41
  -2   2  15    4.18    2.56
   1  -2 -15   57.03    5.15
   1  -2 -15   60.82    4.04
  -1   2  15   54.35    4.47
   0  -2 -15    0.64    2.70
   0  -2 -15    1.91    1.70
   0  -2 -15    0.21    1.83
   0   2  15    1.87    2.17
  -1  -2 -15   93.55    5.77
  -1  -2 -15  100.85    6.02
  -1  -2 -15  107.60    6.87
   1   2  15  107.47    6.21
  -2  -2 -15    6.05    2.23
  -2  -2 -15    5.92    2.10
   2   2  15   10.00    2.29
  -3  -2 -15    0.84    2.28
  -3  -2 -15   -1.99    2.13
   3   2  15   -1.53    1.99
  -4  -2 -15    0.86    2.22
  -4  -2 -15   -0.76    2.16
  -5  -2 -15    2.18    2.32
  -5  -2 -15   -1.12    2.13
   3  -3 -15   -5.47    4.14
   3  -3 -15    1.08    2.67
   2  -3 -15   44.40    5.28
   1  -3 -15    1.30    2.07
   1  -3 -15    3.38    3.15
  -1   3  15   -2.22    2.37
   0  -3 -15    2.69    1.95
   0  -3 -15    5.55    2.90
   0  -3 -15    3.04    2.11
   0   3  15    5.11    2.29
   0   3  15    0.64    2.40
  -1  -3 -15    2.55    2.68
  -1  -3 -15   -0.02    1.73
  -1  -3 -15    0.56    1.82
   1   3  15   -0.75    2.26
   1   3  15   -0.11    2.00
  -2  -3 -15   15.95    2.39
  -2  -3 -15   11.23    2.17
   2   3  15   14.34    2.59
  -3  -3 -15   38.98    3.55
  -3  -3 -15   33.97    3.57
  -4  -3 -15   -2.47    2.18
  -4  -3 -15    1.33    2.34
  -5  -3 -15   40.40    3.59
   2  -4 -15    1.87    2.57
   2  -4 -15   -3.30    4.11
  -2   4  15    2.85    2.67
   1  -4 -15   45.47    5.27
   1  -4 -15   47.19    4.06
  -1   4  15   49.05    4.46
   0  -4 -15    0.89    2.06
   0  -4 -15    0.01    2.93
   0   4  15    2.59    2.35
   0   4  15   -3.17    2.28
  -1  -4 -15    0.69    1.99
  -1  -4 -15    1.87    1.87
  -1  -4 -15    2.55    2.76
   1   4  15   -0.49    2.33
   1   4  15   -2.05    2.19
  -2  -4 -15   11.30    2.08
  -2  -4 -15    8.65    2.11
   2   4  15    4.70    2.24
  -3  -4 -15    2.50    2.12
  -3  -4 -15    0.32    2.06
  -4  -4 -15   34.33    3.36
  -4  -4 -15   28.74    3.38
  -5  -4 -15   -3.66    2.17
   1  -5 -15   -1.87    3.95
  -1   5  15    1.04    2.60
   0  -5 -15    8.16    2.52
   0  -5 -15    7.75    3.45
   0   5  15    5.22    2.87
  -1  -5 -15   25.00    3.00
  -1  -5 -15   24.01    2.81
   1   5  15   20.35    3.10
   1   5  15   18.67    3.37
  -2  -5 -15    2.03    2.04
  -2  -5 -15    2.27    1.95
  -3  -5 -15   22.59    2.53
  -4  -5 -15    6.07    2.23
   0  -4  16    9.13    3.16
   1  -4  16    1.37    2.95
  -2  -3  16    3.37    2.25
  -1  -3  16   29.53    3.23
   0  -3  16   -0.03    2.67
   1  -3  16   -0.57    2.94
   2  -3  16   -1.11    2.71
   3  -3  16   -2.15    2.65
  -3  -2  16    3.12    2.18
  -2  -2  16   22.22    2.80
  -1  -2  16    0.20    2.07
   0  -2  16   10.75    2.55
   1  -2  16   21.42    3.37
   2  -2  16    4.81    2.84
   3  -2  16   -1.19    2.61
   4  -2  16    1.41    2.68
   3   1 -16   32.05    4.03
  -3  -1  16   26.40    3.05
  -2  -1  16   -0.02    1.97
  -2  -1  16   -0.20    2.29
  -1  -1  16    3.01    2.01
   0   1 -16    2.32    1.71
   0  -1  16    3.50    2.05
  -1   1 -16    0.56    1.79
   1  -1  16    0.69    2.29
  -2   1 -16   52.65    4.09
   2  -1  16   46.36    4.46
  -3   1 -16    0.73    2.46
   3  -1  16    1.18    2.60
  -4   1 -16   35.13    3.64
   3   0 -16    2.24    3.26
  -3   0  16    1.90    2.04
   2   0 -16   29.31    3.91
  -2   0  16   26.90    2.90
  -2   0  16   30.13    3.21
   1   0 -16   20.05    3.25
   1   0 -16   18.04    2.31
  -1   0  16   17.77    2.70
  -1   0  16   15.52    2.42
   0   0 -16    4.96    1.86
   0   0  16    5.09    2.00
  -1   0 -16   14.38    2.21
  -1   0 -16   14.26    2.26
   1   0  16   12.77    2.27
  -2   0 -16    3.57    2.31
  -2   0 -16    5.48    2.44
   2   0  16    4.41    2.32
  -3   0 -16   20.54    3.22
  -3   0 -16   26.06    3.21
  -4   0 -16   -1.49    2.34
  -4   0 -16   -1.50    2.42
  -5   0 -16   21.36    3.03
   3  -1 -16   -3.73    3.44
  -3   1  16   -2.83    1.95
   2  -1 -16    0.03    2.09
   2  -1 -16   -4.05    2.96
  -2   1  16    0.54    1.82
  -2   1  16   -0.41    2.35
   1  -1 -16    0.00    1.84
   1  -1 -16   -0.56    2.89
   1  -1 -16   -0.15    2.16
  -1   1  16    0.74    1.82
  -1   1  16    2.89    2.24
   0  -1 -16   89.71    6.17
   0  -1 -16   86.54    5.36
   0  -1 -16   78.53    5.01
   0   1  16   81.77    5.43
   0   1  16   83.53    5.12
  -1  -1 -16    3.47    1.98
  -1  -1 -16    6.72    1.93
   1   1  16   10.15    2.33
   1   1  16    2.92    1.88
  -2  -1 -16   66.60    4.61
  -2  -1 -16   61.28    4.85
  -3  -1 -16    8.55    2.73
  -3  -1 -16    7.01    2.56
  -4  -1 -16   -2.83    2.30
  -4  -1 -16   -1.38    2.30
  -5  -1 -16    4.76    2.59
  -5  -1 -16    4.22    2.45
   3  -2 -16   -5.38    3.59
   3  -2 -16    1.93    2.55
   2  -2 -16    0.43    2.27
   2  -2 -16   -1.83    3.35
   1  -2 -16   13.53    2.38
   1  -2 -16   13.04    3.41
  -1   2  16   11.66    2.79
   0  -2 -16    2.14    2.85
   0  -2 -16   -0.22    1.80
   0  -2 -16    0.33    1.96
   0   2  16   -0.47    2.24
  -1  -2 -16   48.15    4.23
  -1  -2 -16   34.59    3.38
  -1  -2 -16   36.88    3.16
   1   2  16   37.13    3.51
  -2  -2 -16    2.55    2.12
  -2  -2 -16   -0.94    2.07
   2   2  16   -0.77    2.12
  -3  -2 -16   39.56    4.14
  -3  -2 -16   42.34    4.08
   3   2  16   53.30    3.85
  -4  -2 -16    0.80    2.47
  -4  -2 -16    0.48    2.45
  -5  -2 -16   -0.14    2.29
   2  -3 -16   34.87    4.89
   1  -3 -16    7.99    3.54
   1  -3 -16    4.55    2.35
   0  -3 -16   51.71    4.21
   0  -3 -16   47.25    3.87
   0  -3 -16   61.99    5.10
   0   3  16   58.68    4.43
   0   3  16   48.17    4.44
  -1  -3 -16    4.73    2.83
  -1  -3 -16    3.71    1.91
  -1  -3 -16    4.31    2.05
   1   3  16    1.70    2.43
  -2  -3 -16    0.34    1.96
  -2  -3 -16    1.59    1.89
   2   3  16   -0.50    2.29
  -3  -3 -16   -2.04    2.33
  -3  -3 -16    2.99    2.40
  -4  -3 -16   10.10    2.78
  -4  -3 -16    0.70    2.48
  -5  -3 -16   11.35    2.78
   1  -4 -16   20.00    3.08
   1  -4 -16   17.89    4.14
  -1   4  16   20.95    3.21
   0  -4 -16    4.24    3.27
   0  -4 -16    5.81    2.25
   0   4  16    2.95    2.44
  -1  -4 -16   43.56    3.67
  -1  -4 -16   43.39    3.40
   1   4  16   30.29    3.70
   1   4  16   41.32    4.10
  -2  -4 -16    0.52    1.90
  -2  -4 -16    2.41    2.01
   2   4  16   -4.24    2.15
  -3  -4 -16   -1.05    2.06
  -3  -4 -16    0.83    2.12
  -4  -4 -16   -4.84    2.40
   0  -5 -16    1.49    2.43
   0   5  16   -0.87    2.70
  -1  -5 -16    1.28    2.15
   1   5  16    1.48    2.69
  -2  -5 -16    5.02    2.12
  -3  -5 -16    9.64    2.17
  -1  -3  17   31.89    3.36
   0  -3  17    8.85    2.85
   1  -3  17   13.43    3.57
   2  -3  17    6.12    3.20
  -2  -2  17    2.61    2.23
  -1  -2  17    3.42    2.33
   0  -2  17    9.02    2.61
   1  -2  17   -1.23    2.70
   2  -2  17   14.49    3.41
   3  -2  17    6.38    3.09
  -2  -1  17    2.65    2.15
  -1  -1  17   41.67    3.66
   0  -1  17    4.39    2.24
  -1   1 -17    0.41    1.93
   1  -1  17   -1.62    2.25
  -2   1 -17    4.84    2.37
   2  -1  17    1.55    2.79
  -3   1 -17    9.93    2.87
   3  -1  17   10.02    3.14
  -4   1 -17   13.48    3.15
   2   0 -17   15.34    3.51
  -2   0  17   14.80    2.50
   1   0 -17    2.13    1.92
   1   0 -17    5.01    2.94
  -1   0  17    0.03    1.94
  -1   0  17    2.94    2.32
   0   0 -17   35.30    3.16
   0   0  17   40.08    3.39
  -1   0 -17    2.55    1.99
   1   0  17    1.66    2.05
  -2   0 -17    3.04    2.27
   2   0  17    2.40    2.28
  -3   0 -17    8.67    2.87
  -3   0 -17    4.34    2.86
  -4   0 -17   23.06    3.39
   2  -1 -17   -0.26    2.17
   2  -1 -17    2.38    3.32
  -2   1  17   -0.77    1.87
   1  -1 -17    1.89    2.95
   1  -1 -17    3.37    2.01
  -1   1  17    3.77    2.01
  -1   1  17    2.75    2.32
   0  -1 -17    2.23    2.06
   0  -1 -17    0.65    1.86
   0  -1 -17    6.13    2.99
   0   1  17    2.08    2.23
  -1  -1 -17   10.69    2.34
  -1  -1 -17   14.12    2.32
   1   1  17   16.22    2.62
  -2  -1 -17   34.24    3.58
  -2  -1 -17   36.77    3.51
   2   1  17   43.54    3.65
  -3  -1 -17    1.61    2.83
  -3  -1 -17    1.10    2.68
  -4  -1 -17   36.82    3.87
  -4  -1 -17   34.62    3.97
   2  -2 -17   26.18    4.46
   1  -2 -17    2.59    3.30
   1  -2 -17    5.94    2.20
   0  -2 -17    1.36    1.97
   0  -2 -17    2.92    3.02
   0  -2 -17    0.29    2.13
   0   2  17    1.83    2.46
  -1  -2 -17    5.14    2.16
  -1  -2 -17    9.47    2.28
   1   2  17   10.74    2.46
  -2  -2 -17   22.10    2.96
  -2  -2 -17   22.95    2.88
   2   2  17   30.02    3.08
  -3  -2 -17   -1.30    2.59
  -3  -2 -17    5.15    2.72
   3   2  17    5.60    2.33
  -4  -2 -17    3.49    2.79
  -4  -2 -17    4.70    2.81
   1  -3 -17    8.68    3.78
   1  -3 -17    7.57    2.50
   0  -3 -17   27.93    3.25
   0  -3 -17   28.21    4.08
   0  -3 -17   29.79    3.03
   0   3  17   30.49    3.36
  -1  -3 -17   -1.99    2.81
  -1  -3 -17   -0.20    1.99
  -1  -3 -17    0.00    2.04
   1   3  17   -1.22    2.46
  -2  -3 -17   37.52    3.41
  -2  -3 -17   40.23    3.71
   2   3  17   43.68    3.95
  -3  -3 -17   22.19    3.08
  -4  -3 -17   -2.51    2.62
   0  -4 -17    9.17    2.44
   0  -4 -17    4.69    3.54
   0   4  17   12.68    2.80
  -1  -4 -17    5.85    2.27
  -1  -4 -17    5.88    2.37
  -2  -4 -17   -0.53    2.01
   2   4  17    1.17    2.40
  -3  -4 -17   14.18    2.51
  -1  -2  18    5.41    2.37
   0  -2  18   18.63    3.01
   1  -2  18   26.22    3.61
   2  -2  18    3.48    3.24
  -1  -1  18   22.16    2.90
   0  -1  18   -0.29    2.24
   1  -1  18   31.17    3.40
   2  -1  18   11.30    3.15
  -3   1 -18    1.00    2.68
   2   0 -18   17.12    3.57
  -2   0  18   11.37    2.46
  -1   0  18   23.95    2.82
   0   0 -18    5.34    2.09
   0   0  18    6.17    2.21
  -1   0 -18    2.97    2.14
   1   0  18    2.14    2.14
  -2   0 -18    9.13    2.54
  -3   0 -18    5.46    2.88
  -4   0 -18   -2.59    2.74
   2  -1 -18    0.62    3.46
   1  -1 -18   43.29    4.59
   1  -1 -18   37.46    3.47
   0  -1 -18   20.97    2.62
  -1  -1 -18    0.95    2.10
  -1  -1 -18    0.14    2.14
   1   1  18    1.01    2.28
  -2  -1 -18    2.32    2.32
  -2  -1 -18    3.08    2.37
   2   1  18   -1.41    2.31
  -3  -1 -18   20.67    3.41
  -3  -1 -18   22.50    3.57
   3   1  18   22.54    3.04
  -4  -1 -18    3.51    2.87
   1  -2 -18   -1.54    3.39
   1  -2 -18   -0.91    2.13
   0  -2 -18   15.68    2.78
   0  -2 -18   17.30    3.57
   0  -2 -18   18.12    2.63
  -1  -2 -18    6.52    2.30
  -1  -2 -18    7.49    2.25
   1   2  18    1.10    2.35
  -2  -2 -18    1.83    2.24
  -2  -2 -18    1.87    2.27
   2   2  18    3.45    2.34
  -3  -2 -18    2.55    2.76
  -3  -2 -18   -1.97    2.60
  -4  -2 -18   19.47    3.50
   1  -3 -18    6.31    2.55
   1  -3 -18   -0.52    3.60
   0  -3 -18    1.71    3.29
   0  -3 -18    0.74    2.47
   0  -3 -18    9.67    2.34
  -1  -3 -18   14.25    3.33
  -1  -3 -18   10.94    2.41
  -1  -3 -18   12.23    2.61
  -2  -3 -18    3.49    2.26
  -2  -3 -18    1.55    2.21
   2   3  18    4.66    2.66
  -3  -3 -18   -0.25    2.41
  -1  -4 -18    0.20    2.14
  -2  -4 -18   20.06    2.78
   0  -1  19   21.95    3.06
   1  -1  19    5.22    2.61
   2  -1  19   -0.51    2.68
  -1   0  19    7.72    2.34
   0   0  19    3.92    2.30
  -1   0 -19   34.57    3.41
  -2   0 -19   -3.15    2.28
  -3   0 -19   12.46    3.18
   1  -1 -19    7.22    2.31
   1  -1 -19    6.64    3.31
   0  -1 -19    1.31    2.11
  -1  -1 -19   12.40    2.58
  -2  -1 -19    6.85    2.55
  -3  -1 -19   -0.70    2.87
  -3  -1 -19   -0.75    2.69
   0  -2 -19    3.16    3.18
   0  -2 -19   -0.51    2.18
  -1  -2 -19   16.08    2.80
  -1  -2 -19   16.27    2.71
  -2  -2 -19    1.46    2.43
  -2  -2 -19    4.12    2.41
  -3  -2 -19    1.37    2.64
  -1  -3 -19    0.01    2.19
  -2  -3 -19    8.02    2.51
   0   0   0    0.00    0.00
;
_shelx_hkl_checksum   59732
